# Supplementary material for: The Contribution of Environmental Science to Mental Health Research: A Scoping Review
Source: Int J Environ Res Public Health. 2023 Mar 27;20(7):5278. doi: 10.3390/ijerph20075278 (PMC10094550; doi:10.3390/ijerph20075278)
Supplement: Supplementary file 1 [file ijerph-20-05278-s001.zip]

Archive with 9 entries (9 files):
- Table S1 - Search Strings - Supplementary Materials.xlsx
- Table S2 - Screening Record - Supplementary Materials.xlsx
- Table S3 - All Returned Papers - Supplementary Materials.csv
- Table S4 - Title Screening - Supplementary Materials.xlsx
- Table S5 - Abstract Screening - Supplementary Material.xlsx
- Table S6 - Extraction Table - Supplementary Materials.xlsx
- Table S7 - Reviews - Supplementary Materials.xlsx
- Table S8 - Inaccessible Papers - Supplementary Materials.xlsx
- Protocol - Supplementary Material.pdf
