# Supplementary material for: The Contribution of Environmental Science to Mental Health Research: A Scoping Review
Source: Int J Environ Res Public Health. 2023 Mar 27;20(7):5278. doi: 10.3390/ijerph20075278 (PMC10094550; doi:10.3390/ijerph20075278)
Supplement: Supplementary file 1 [file ijerph-20-05278-s001.zip › Table S1 - Search Strings - Supplementary Materials.xlsx]

## Sheet: Table S1
Development of search strings for scoping review of environmental science contribution to mental health research. Beginning with terms suggested in expert workshops and developed iteratively by MR, KI, KC and MC, with continued discussion with experts, to find a search string which returned a managable number of papers and covered the bredth of the topic under review. Final search strings used we…
Version	Date	Where searched	Search string (Mental health)	Link	Search string (Environmental Science)	Search string exclusions	Date limits	Number of papers	Accepted?	Rationale	Comments
1	2020-08-06	WoS	TS = (“mental health” OR “mental ill*” OR “mental disorder” OR “general health questionnaire” OR “GHQ” OR “quality of life” OR “QOL” OR “life satisf*” OR content* OR Resilien* OR Relax* OR “self esteem” OR “self-esteem” OR “Psychological Restor*” OR Stress* OR destress OR “cognitive development” OR “cognitive decline” OR “neurocognitive disorder” OR “neuro-cognitive disorder” OR “Behaviour* probl…	AND	flood* OR “water inundation” OR “river avulsion” OR Sediment* OR Drought OR “water stress” OR “water level” OR “wild fire” OR “bush fire” OR “forest fire” OR “heat wave” OR “air temperature” OR Landslide* OR “climate change” OR “global warming” OR warming OR “sea level rise” OR geomorph* OR water OR “Riparian corridor” OR river OR Coast* OR “rock pool” OR “sea stack” OR “sea arch” OR cliff OR Mou…	TI = (mice OR mouse)	1990 to today	3469053	No	To many!	As expected very very high (though higher than I imagined!). Disease is probably the biggest problem. Will re-run without.
2	2020-08-06	WoS	TS = (“mental health” OR “mental ill*” OR “mental disorder” OR “general health questionnaire” OR “GHQ” OR “quality of life” OR “QOL” OR “life satisf*” OR content* OR Resilien* OR Relax* OR “self esteem” OR “self-esteem” OR “Psychological Restor*” OR Stress* OR destress OR “cognitive development” OR “cognitive decline” OR “neurocognitive disorder” OR “neuro-cognitive disorder” OR “Behaviour* probl…	AND	flood* OR “water inundation” OR “river avulsion” OR Sediment* OR Drought OR “water stress” OR “water level” OR “wild fire” OR “bush fire” OR “forest fire” OR “heat wave” OR “air temperature” OR Landslide* OR “climate change” OR “global warming” OR warming OR “sea level rise” OR geomorph* OR water OR “Riparian corridor” OR river OR Coast* OR “rock pool” OR “sea stack” OR “sea arch” OR cliff OR Mou…	TI = (mice OR mouse)		2865713	No	Too many!	Running excluding 'disease'. Remove pathogen next
3	2020-08-06	WoS	TS = (“mental health” OR “mental ill*” OR “mental disorder” OR “general health questionnaire” OR “GHQ” OR “quality of life” OR “QOL” OR “life satisf*” OR content* OR Resilien* OR Relax* OR “self esteem” OR “self-esteem” OR “Psychological Restor*” OR Stress* OR destress OR “cognitive development” OR “cognitive decline” OR “neurocognitive disorder” OR “neuro-cognitive disorder” OR “Behaviour* probl…	AND	flood* OR “water inundation” OR “river avulsion” OR Sediment* OR Drought OR “water stress” OR “water level” OR “wild fire” OR “bush fire” OR “forest fire” OR “heat wave” OR “air temperature” OR Landslide* OR “climate change” OR “global warming” OR warming OR “sea level rise” OR geomorph* OR water OR “Riparian corridor” OR river OR Coast* OR “rock pool” OR “sea stack” OR “sea arch” OR cliff OR Mou…	TI = (mice OR mouse)		2771973	No	Too many!	Running excluding 'pathogen'. Removed hundred thosend. A scan of the top results identifies the folllowing words as problematic: stress, lead, resilient, content, natur*. Stress seems to be worst, will re-run without and see how many are removed, then can rethink how we can include.
4	2020-08-06	WoS	TS = (“mental health” OR “mental ill*” OR “mental disorder” OR “general health questionnaire” OR “GHQ” OR “quality of life” OR “QOL” OR “life satisf*” OR content* OR Resilien* OR Relax* OR “self esteem” OR “self-esteem” OR “Psychological Restor*” OR destress OR “cognitive development” OR “cognitive decline” OR “neurocognitive disorder” OR “neuro-cognitive disorder” OR “Behaviour* problem” OR “Beh…	AND	flood* OR “water inundation” OR “river avulsion” OR Sediment* OR Drought OR “water stress” OR “water level” OR “wild fire” OR “bush fire” OR “forest fire” OR “heat wave” OR “air temperature” OR Landslide* OR “climate change” OR “global warming” OR warming OR “sea level rise” OR geomorph* OR water OR “Riparian corridor” OR river OR Coast* OR “rock pool” OR “sea stack” OR “sea arch” OR cliff OR Mou…	TI = (mice OR mouse)		2228754	No	Too many!	Removing stress removed half a million. Next removed 'resilient', as an ecological word.
5	2020-08-06	WoS	TS = (“mental health” OR “mental ill*” OR “mental disorder” OR “general health questionnaire” OR “GHQ” OR “quality of life” OR “QOL” OR “life satisf*” OR content* OR Relax* OR “self esteem” OR “self-esteem” OR “Psychological Restor*” OR destress OR “cognitive development” OR “cognitive decline” OR “neurocognitive disorder” OR “neuro-cognitive disorder” OR “Behaviour* problem” OR “Behaviour* disor…	AND	flood* OR “water inundation” OR “river avulsion” OR Sediment* OR Drought OR “water stress” OR “water level” OR “wild fire” OR “bush fire” OR “forest fire” OR “heat wave” OR “air temperature” OR Landslide* OR “climate change” OR “global warming” OR warming OR “sea level rise” OR geomorph* OR water OR “Riparian corridor” OR river OR Coast* OR “rock pool” OR “sea stack” OR “sea arch” OR cliff OR Mou…	TI = (mice OR mouse)		2183760	No	Too many!	Removing resilient removed hundred thousend. Resilient would be less of a problem to remove entirely. Content removed next
6	2020-08-06	WoS	TS = (“mental health” OR “mental ill*” OR “mental disorder” OR “general health questionnaire” OR “GHQ” OR “quality of life” OR “QOL” OR “life satisf*” OR Relax* OR “self esteem” OR “self-esteem” OR “Psychological Restor*” OR destress OR “cognitive development” OR “cognitive decline” OR “neurocognitive disorder” OR “neuro-cognitive disorder” OR “Behaviour* problem” OR “Behaviour* disorder” OR “con…	AND	flood* OR “water inundation” OR “river avulsion” OR Sediment* OR Drought OR “water stress” OR “water level” OR “wild fire” OR “bush fire” OR “forest fire” OR “heat wave” OR “air temperature” OR Landslide* OR “climate change” OR “global warming” OR warming OR “sea level rise” OR geomorph* OR water OR “Riparian corridor” OR river OR Coast* OR “rock pool” OR “sea stack” OR “sea arch” OR cliff OR Mou…	TI = (mice OR mouse)		1424513	No	Too many!	Removed half a million. Again less of a problem to remove. Lead (as in the metal, but read as the other) removed next. Also remove mercury and cadmium, but leave 'heavy metal'
7	2020-08-06	WoS	TS = (“mental health” OR “mental ill*” OR “mental disorder” OR “general health questionnaire” OR “GHQ” OR “quality of life” OR “QOL” OR “life satisf*” OR Relax* OR “self esteem” OR “self-esteem” OR “Psychological Restor*” OR destress OR “cognitive development” OR “cognitive decline” OR “neurocognitive disorder” OR “neuro-cognitive disorder” OR “Behaviour* problem” OR “Behaviour* disorder” OR “con…	AND	flood* OR “water inundation” OR “river avulsion” OR Sediment* OR Drought OR “water stress” OR “water level” OR “wild fire” OR “bush fire” OR “forest fire” OR “heat wave” OR “air temperature” OR Landslide* OR “climate change” OR “global warming” OR warming OR “sea level rise” OR geomorph* OR water OR “Riparian corridor” OR river OR Coast* OR “rock pool” OR “sea stack” OR “sea arch” OR cliff OR Mou…	TI = (mice OR mouse)		1118528	No	Too many!	Another 300,000 removed. Easy removal. Will check how many removing 'nature' does, but that's problematic.
8	2020-08-06	WoS	TS = (“mental health” OR “mental ill*” OR “mental disorder” OR “general health questionnaire” OR “GHQ” OR “quality of life” OR “QOL” OR “life satisf*” OR Relax* OR “self esteem” OR “self-esteem” OR “Psychological Restor*” OR destress OR “cognitive development” OR “cognitive decline” OR “neurocognitive disorder” OR “neuro-cognitive disorder” OR “Behaviour* problem” OR “Behaviour* disorder” OR “con…	AND	flood* OR “water inundation” OR “river avulsion” OR Sediment* OR Drought OR “water stress” OR “water level” OR “wild fire” OR “bush fire” OR “forest fire” OR “heat wave” OR “air temperature” OR Landslide* OR “climate change” OR “global warming” OR warming OR “sea level rise” OR geomorph* OR water OR “Riparian corridor” OR river OR Coast* OR “rock pool” OR “sea stack” OR “sea arch” OR cliff OR Mou…	TI = (mice OR mouse)		920106	No	Too many!+A9:K9	That helped, removed 100,000, but probably lost many relevent papers. Keep in mind for adding back in, along with stress. Check again for obviously problematic words.
9	2020-08-06	WoS	TS = (“mental health” OR “mental ill*” OR “mental disorder” OR “general health questionnaire” OR “GHQ” OR “quality of life” OR “QOL” OR “life satisf*” OR Relax* OR “self esteem” OR “self-esteem” OR “Psychological Restor*” OR destress OR “cognitive development” OR “cognitive decline” OR “neurocognitive disorder” OR “neuro-cognitive disorder” OR “Behaviour* problem” OR “Behaviour* disorder” OR “con…	AND	flood* OR “water inundation” OR “river avulsion” OR Sediment* OR Drought OR “water stress” OR “water level” OR “wild fire” OR “bush fire” OR “forest fire” OR “heat wave” OR “air temperature” OR Landslide* OR “climate change” OR “global warming” OR warming OR “sea level rise” OR geomorph* OR water OR “Riparian corridor” OR river OR Coast* OR “rock pool” OR “sea stack” OR “sea arch” OR cliff OR Mou…	TI = (mice OR mouse)		693709	No	Too many!+A9:K9	ADD = add, remove acronym and hope caught by full word, removed 300,000, so that helped. Recheck for obviously problematic words.
10	2020-08-06	WoS	TS = (“mental health” OR “mental ill*” OR “mental disorder” OR “general health questionnaire” OR “GHQ” OR “quality of life” OR “QOL” OR “life satisf*” OR Relax* OR “self esteem” OR “self-esteem” OR “Psychological Restor*” OR destress OR “cognitive development” OR “cognitive decline” OR “neurocognitive disorder” OR “neuro-cognitive disorder” OR “Behaviour* problem” OR “Behaviour* disorder” OR “con…	AND	flood* OR “water inundation” OR “river avulsion” OR Sediment* OR Drought OR “water stress” OR “water level” OR “wild fire” OR “bush fire” OR “forest fire” OR “heat wave” OR “air temperature” OR Landslide* OR “climate change” OR “global warming” OR warming OR “sea level rise” OR geomorph* OR water OR “Riparian corridor” OR river OR Coast* OR “rock pool” OR “sea stack” OR “sea arch” OR cliff OR Mou…	TI = (mice OR mouse OR rat* OR rodent*)		6470935	No	Too many!	Add 'rat' and 'rodent' to excluded words, removed 300,000. Try putting topic rather than title exclusion.
11	2020-08-06	WoS	TS = (“mental health” OR “mental ill*” OR “mental disorder” OR “general health questionnaire” OR “GHQ” OR “quality of life” OR “QOL” OR “life satisf*” OR Relax* OR “self esteem” OR “self-esteem” OR “Psychological Restor*” OR destress OR “cognitive development” OR “cognitive decline” OR “neurocognitive disorder” OR “neuro-cognitive disorder” OR “Behaviour* problem” OR “Behaviour* disorder” OR “con…	AND	flood* OR “water inundation” OR “river avulsion” OR Sediment* OR Drought OR “water stress” OR “water level” OR “wild fire” OR “bush fire” OR “forest fire” OR “heat wave” OR “air temperature” OR Landslide* OR “climate change” OR “global warming” OR warming OR “sea level rise” OR geomorph* OR water OR “Riparian corridor” OR river OR Coast* OR “rock pool” OR “sea stack” OR “sea arch” OR cliff OR Mou…	TS = (mice OR mouse OR rat* OR rodent*)		427172	No	Too many!	Rodents excluded in topic loses another 200,000. Check again for obvious exclusions
12	2020-08-06	WoS	TS = (“mental health” OR “mental ill*” OR “mental disorder” OR “general health questionnaire” OR “GHQ” OR “quality of life” OR “QOL” OR “life satisf*” OR Relax* OR “self esteem” OR “self-esteem” OR “Psychological Restor*” OR destress OR “cognitive development” OR “cognitive decline” OR “neurocognitive disorder” OR “neuro-cognitive disorder” OR “Behaviour* problem” OR “Behaviour* disorder” OR “con…	AND	flood* OR “water inundation” OR “river avulsion” OR Sediment* OR Drought OR “water stress” OR “water level” OR “wild fire” OR “bush fire” OR “forest fire” OR “heat wave” OR “air temperature” OR Landslide* OR “climate change” OR “global warming” OR warming OR “sea level rise” OR geomorph* OR water OR “Riparian corridor” OR river OR Coast* OR “rock pool” OR “sea stack” OR “sea arch” OR cliff OR Mou…	TS = (mice OR mouse OR rat* OR rodent*)		321592	No	Too many!	mani* for manic also hits 'manipulation'. Change to 'manic OR mania'. Removes 100,000. Check again for obvious exclusions.
13	2020-08-06	WoS	TS = (“mental health” OR “mental ill*” OR “mental disorder” OR “general health questionnaire” OR “GHQ” OR “quality of life” OR “QOL” OR “life satisf*” OR Relax* OR “self esteem” OR “self-esteem” OR “Psychological Restor*” OR destress OR “cognitive development” OR “cognitive decline” OR “neurocognitive disorder” OR “neuro-cognitive disorder” OR “Behaviour* problem” OR “Behaviour* disorder” OR “con…	AND	flood* OR “water inundation” OR “river avulsion” OR Sediment* OR Drought OR “water stress” OR “water level” OR “wild fire” OR “bush fire” OR “forest fire” OR “heat wave” OR “air temperature” OR Landslide* OR “climate change” OR “global warming” OR warming OR “sea level rise” OR geomorph* OR water OR “Riparian corridor” OR river OR Coast* OR “rock pool” OR “sea stack” OR “sea arch” OR cliff OR Mou…	TS = (mice OR mouse OR rat* OR rodent*)		264991	No	Too many!	CO for carbon monoxide picks up co-. Remove acronym and hope full word is enough. Lost 70,000. Check for obvious exclusions
14	2020-08-06	WoS	TS = (“mental health” OR “mental ill*” OR “mental disorder” OR “general health questionnaire” OR “GHQ” OR “quality of life” OR “QOL” OR “life satisf*” OR Relax* OR “self esteem” OR “self-esteem” OR “Psychological Restor*” OR destress OR “cognitive development” OR “cognitive decline” OR “neurocognitive disorder” OR “neuro-cognitive disorder” OR “Behaviour* problem” OR “Behaviour* disorder” OR “con…	AND	TS=flood* OR “water inundation” OR “river avulsion” OR Sediment* OR Drought OR “water stress” OR “water level” OR “wild fire” OR “bush fire” OR “forest fire” OR “heat wave” OR “air temperature” OR Landslide* OR “climate change” OR “global warming” OR warming OR “sea level rise” OR geomorph* OR water OR “Riparian corridor” OR river OR Coast* OR “rock pool” OR “sea stack” OR “sea arch” OR cliff OR …	TS = (mice OR mouse OR rat* OR rodent*)		212031	No	Too many!	Alcohol* picks up alcohol in experiemment, replace with alcoholic and alcoholism. Lost 50,000.
15	2020-08-07	WoS	TS = (“mental health” OR “mental ill*” OR “mental disorder” OR “general health questionnaire” OR “GHQ” OR “quality of life” OR “QOL” OR “life satisf*” OR “self esteem” OR “self-esteem” OR “Psychological Restor*” OR destress OR “cognitive development” OR “cognitive decline” OR “neurocognitive disorder” OR “neuro-cognitive disorder” OR “Behaviour* problem” OR “Behaviour* disorder” OR “conduct disor…	AND	TS=flood* OR “water inundation” OR “river avulsion” OR Sediment* OR Drought OR “water stress” OR “water level” OR “wild fire” OR “bush fire” OR “forest fire” OR “heat wave” OR “air temperature” OR Landslide* OR “climate change” OR “global warming” OR warming OR “sea level rise” OR geomorph* OR water OR “Riparian corridor” OR river OR Coast* OR “rock pool” OR “sea stack” OR “sea arch” OR cliff OR …	TS = (mice OR mouse OR rat* OR rodent*)		159543	No	Too many!	Relax is causing problems because we 'relax' conditions. Removing it removes 50,000 entries
16	2020-08-07	WoS	TS = (“mental health” OR “mental ill*” OR “mental disorder” OR “general health questionnaire” OR “GHQ” OR “quality of life” OR “QOL” OR “life satisf*” OR “self esteem” OR “self-esteem” OR “Psychological Restor*” OR destress OR “cognitive development” OR “cognitive decline” OR “neurocognitive disorder” OR “neuro-cognitive disorder” OR “Behaviour* problem” OR “Behaviour* disorder” OR “conduct disor…	AND	TS=flood* OR “water inundation” OR “river avulsion” OR Sediment* OR Drought OR “water stress” OR “water level” OR “wild fire” OR “bush fire” OR “forest fire” OR “heat wave” OR “air temperature” OR Landslide* OR “climate change” OR “global warming” OR warming OR “sea level rise” OR geomorph* OR water OR “Riparian corridor” OR river OR Coast* OR “rock pool” OR “sea stack” OR “sea arch” OR cliff OR …	TS = (mice OR mouse OR rat* OR rodent*)		127932	No	Too many!	dissociation is a chemical term. Limit to dissociative disorder (as called by ICD10)? Remove30,000, potentially miss some papers though (through losing dissociative)
17	2020-08-07	WoS	TS = (“mental health” OR “mental ill*” OR “mental disorder” OR “general health questionnaire” OR “GHQ” OR “quality of life” OR “QOL” OR “life satisf*” OR “self esteem” OR “self-esteem” OR “Psychological Restor*” OR destress OR “cognitive development” OR “cognitive decline” OR “neurocognitive disorder” OR “neuro-cognitive disorder” OR “Behaviour* problem” OR “Behaviour* disorder” OR “conduct disor…	AND	TS=flood* OR “water inundation” OR “river avulsion” OR Sediment* OR Drought OR “water stress” OR “water level” OR “wild fire” OR “bush fire” OR “forest fire” OR “heat wave” OR “air temperature” OR Landslide* OR “climate change” OR “global warming” OR warming OR “sea level rise” OR geomorph* OR water OR “Riparian corridor” OR river OR Coast* OR “rock pool” OR “sea stack” OR “sea arch” OR cliff OR …	TS = (mice OR mouse OR rat* OR rodent*)		114725	No	Too many!	Trauma* giving physical trauma. Will replace with "post traumatic stress" OR "post-traumatic stress". Removed 15,000
19	2020-08-07	WoS	TS = (“mental health” OR “mental ill*” OR “mental disorder” OR “general health questionnaire” OR “GHQ” OR “quality of life” OR “QOL” OR “life satisf*” OR “self esteem” OR “self-esteem” OR “Psychological Restor*” OR destress OR “cognitive development” OR “cognitive decline” OR “neurocognitive disorder” OR “neuro-cognitive disorder” OR “Behaviour* problem” OR “Behaviour* disorder” OR “conduct disor…	AND	TS=flood* OR “water inundation” OR “river avulsion” OR Sediment* OR Drought OR “water stress” OR “water level” OR “wild fire” OR “bush fire” OR “forest fire” OR “heat wave” OR “air temperature” OR Landslide* OR “climate change” OR “global warming” OR warming OR “sea level rise” OR geomorph* OR water OR “Riparian corridor” OR river OR Coast* OR “rock pool” OR “sea stack” OR “sea arch” OR cliff OR …	TS = (mice OR mouse OR rat* OR rodent*)		108038	No	Too many!	Alcoholic still causing problems. Remove and hope caught by 'addict' and 'alcoholism'? Removed 6,000
20	2020-08-07	WoS	TS = (“mental health” OR “mental ill*” OR “mental disorder” OR "wellbeing" OR “general health questionnaire” OR “GHQ” OR “quality of life” OR “QOL” OR “life satisf*” OR “self esteem” OR “self-esteem” OR “Psychological Restor*” OR destress OR “cognitive development” OR “cognitive decline” OR “neurocognitive disorder” OR “neuro-cognitive disorder” OR “Behaviour* problem” OR “Behaviour* disorder” OR…	AND	TS=flood* OR “water inundation” OR “river avulsion” OR Sediment* OR Drought OR “water stress” OR “water level” OR “wild fire” OR “bush fire” OR “forest fire” OR “heat wave” OR “air temperature” OR Landslide* OR “climate change” OR “global warming” OR warming OR “sea level rise” OR geomorph* OR water OR “Riparian corridor” OR river OR Coast* OR “rock pool” OR “sea stack” OR “sea arch” OR cliff OR …	TS = (mice OR mouse OR rat* OR rodent*)		110670	No	Too many!	Missed wellbeing in my first copying over of search terms. Only added 2000 though.
21	2020-08-07	WoS	TS = (“mental health” OR “mental ill*” OR “mental disorder” OR "wellbeing" OR “general health questionnaire” OR “GHQ” OR “quality of life” OR “QOL” OR “life satisf*” OR “self esteem” OR “self-esteem” OR “Psychological Restor*” OR destress OR “cognitive development” OR “cognitive decline” OR “neurocognitive disorder” OR “neuro-cognitive disorder” OR “Behaviour* problem” OR “Behaviour* disorder” OR…	AND	TS=flood* OR “water inundation” OR “river avulsion” OR Sediment* OR Drought OR “water stress” OR “water level” OR “wild fire” OR “bush fire” OR “forest fire” OR “heat wave” OR “air temperature” OR Landslide* OR “climate change” OR “global warming” OR warming OR “sea level rise” OR geomorph* OR water OR “Riparian corridor” OR river OR Coast* OR “rock pool” OR “sea stack” OR “sea arch” OR cliff OR …	TS = (mice OR mouse OR rat* OR rodent*)		110195	No	Too many!	Replace anxi* with anxiety OR anxious. Barely helped
22	2020-08-07	WoS	TS = (“mental health” OR “mental ill*” OR “mental disorder” OR "wellbeing" OR “general health questionnaire” OR “GHQ” OR “quality of life” OR “QOL” OR “life satisf*” OR “self esteem” OR “self-esteem” OR “Psychological Restor*” OR destress OR “cognitive development” OR “cognitive decline” OR “neurocognitive disorder” OR “neuro-cognitive disorder” OR “Behaviour* problem” OR “Behaviour* disorder” OR…	AND	TS=flood* OR “water inundation” OR “river avulsion” OR Sediment* OR Drought OR “water stress” OR “water level” OR “wild fire” OR “bush fire” OR “forest fire” OR “heat wave” OR “air temperature” OR Landslide* OR “climate change” OR “global warming” OR warming OR “sea level rise” OR soil OR landscape OR “geomorphic hazard” OR Noise OR soundscape OR weather OR Rain OR Sun OR sunshine OR sunlight OR …	TS = (mice OR mouse OR rat* OR rodent*)		94954	No	Too many!	Depression is a geological term, and so causing problems in combination with geomorph, but also water, river, coast, mountain, soil. All of these are specific 'landscape' words and so could be removed? Risk losing some relevent papers though. 6,000 removed
23	2020-08-07	WoS	TS = (“mental health” OR “mental ill*” OR “mental disorder” OR "wellbeing" OR “general health questionnaire” OR “GHQ” OR “quality of life” OR “QOL” OR “life satisf*” OR “self esteem” OR “self-esteem” OR “Psychological Restor*” OR destress OR “cognitive development” OR “cognitive decline” OR “neurocognitive disorder” OR “neuro-cognitive disorder” OR “Behaviour* problem” OR “Behaviour* disorder” OR…	AND	TS=flood* OR “water inundation” OR “river avulsion” OR Drought OR “water stress” OR “water level” OR “wild fire” OR “bush fire” OR “forest fire” OR “heat wave” OR “air temperature” OR Landslide* OR “climate change” OR “global warming” OR warming OR “sea level rise” OR soil OR landscape OR “geomorphic hazard” OR Noise OR soundscape OR weather OR Rain OR Sun OR sunshine OR sunlight OR dark OR dayli…	TS = (mice OR mouse OR rat* OR rodent*)		89099	No	Too many!	Sediment and erosion continue to cause problems in combination with depression. These are important, but most likely to be studied in relation to flooding, so hopefully removal will not lose to many relevent papers. Remove 5,000
24	2020-08-07	WoS	TS = (“mental health” OR “mental ill*” OR “mental disorder” OR "wellbeing" OR “general health questionnaire” OR “GHQ” OR “quality of life” OR “QOL” OR “life satisf*” OR “self esteem” OR “self-esteem” OR “Psychological Restor*” OR destress OR “cognitive development” OR “cognitive decline” OR “neurocognitive disorder” OR “neuro-cognitive disorder” OR “Behaviour* problem” OR “Behaviour* disorder” OR…	AND	TS=flood* OR “water inundation” OR “river avulsion” OR Drought OR “water stress” OR “water level” OR “wild fire” OR “bush fire” OR “forest fire” OR “heat wave” OR “air temperature” OR Landslide* OR “climate change” OR “global warming” OR warming OR “sea level rise” OR soil OR landscape OR “geomorphic hazard” OR Noise OR soundscape OR weather OR Rain OR Sun OR sunshine OR sunlight OR dark OR dayli…	TS = (mice OR mouse OR rat* OR rodent*)		60751	No	Too many!	Animal causing problems because of 'animal models'. Throwing up a lot of lab studies. We are interested in only wild animals, which captured through wild*, and also diversity, captured through biodivers*. If removing animal will also remove plant, which does give papers like 'nuclear plant'. Remove 30,000
25	2020-08-07	WoS	TS = (“mental health” OR “mental ill*” OR “mental disorder” OR "wellbeing" OR “general health questionnaire” OR “GHQ” OR “quality of life” OR “QOL” OR “life satisf*” OR “self esteem” OR “self-esteem” OR “Psychological Restor*” OR destress OR “cognitive development” OR “cognitive decline” OR “neurocognitive disorder” OR “neuro-cognitive disorder” OR “Behaviour* problem” OR “Behaviour* disorder” OR…	AND	TS=flood* OR “water inundation” OR “river avulsion” OR Drought OR “water stress” OR “water level” OR “wild fire” OR “bush fire” OR “forest fire” OR “heat wave” OR “air temperature” OR Landslide* OR “climate change” OR “global warming” OR warming OR “sea level rise” OR soil OR landscape OR “geomorphic hazard” OR Noise OR soundscape OR weather OR Rain OR Sun OR sunshine OR sunlight OR daylength OR …	TS = (mice OR mouse OR rat* OR rodent*)		57751	No	Too many!	Dark is giving some random results, and likely to add little to the search, where daylight and daylength should capture relevent studies. Removed 3,000
26	2020-08-07	WoS	TS = (“mental health” OR “mental ill*” OR “mental disorder” OR "wellbeing" OR “general health questionnaire” OR “GHQ” OR “quality of life” OR “QOL” OR “life satisf*” OR “self esteem” OR “self-esteem” OR “Psychological Restor*” OR destress OR “cognitive development” OR “cognitive decline” OR “neurocognitive disorder” OR “neuro-cognitive disorder” OR “Behaviour* problem” OR “Behaviour* disorder” OR…	AND	TS=flood* OR “water inundation” OR “river avulsion” OR Drought OR “water stress” OR “water level” OR “wild fire” OR “bush fire” OR “forest fire” OR “heat wave” OR “air temperature” OR Landslide* OR “climate change” OR “global warming” OR warming OR “sea level rise” OR soil OR landscape OR “geomorphic hazard” OR Noise OR soundscape OR weather OR Rain OR Sun OR sunshine OR sunlight OR daylength OR …	TS = (mice OR mouse OR rat* OR rodent*)		57642	No	Too many!	Try excluding "great depression". Only removed 100 papers, but probably OK.
27	2020-08-07	WoS	TS = (“mental health” OR “mental ill*” OR “mental disorder” OR "wellbeing" OR “general health questionnaire” OR “GHQ” OR “quality of life” OR “QOL” OR “life satisf*” OR “self esteem” OR “self-esteem” OR “Psychological Restor*” OR destress OR “cognitive development” OR “cognitive decline” OR “neurocognitive disorder” OR “neuro-cognitive disorder” OR “Behaviour* problem” OR “Behaviour* disorder” OR…	AND	TS=flood* OR “water inundation” OR “river avulsion” OR Drought OR “water stress” OR “water level” OR “wild fire” OR “bush fire” OR “forest fire” OR “heat wave” OR “air temperature” OR Landslide* OR “climate change” OR “global warming” OR warming OR “sea level rise” OR soil OR landscape OR “geomorphic hazard” OR Noise OR soundscape OR weather OR Rain OR Sun OR sunshine OR sunlight OR daylength OR …	TS = (mice OR mouse OR rat* OR rodent*)		54987	No	Too many!	Schitzo is a type of fish! Specify disorders: schizophrenia, schizotypal schizoaffective. Removed 3,000
28	2020-08-07	WoS	TS = (“mental health” OR “mental ill*” OR “mental disorder” OR "wellbeing" OR “general health questionnaire” OR “GHQ” OR “quality of life” OR “QOL” OR “life satisf*” OR “self esteem” OR “self-esteem” OR “Psychological Restor*” OR destress OR “cognitive development” OR “cognitive decline” OR “neurocognitive disorder” OR “neuro-cognitive disorder” OR “Behaviour* problem” OR “Behaviour* disorder” OR…	AND	TS=flood* OR “water inundation” OR “river avulsion” OR Drought OR “water stress” OR “water level” OR “wild fire” OR “bush fire” OR “forest fire” OR “heat wave” OR “air temperature” OR Landslide* OR “climate change” OR “global warming” OR warming OR “sea level rise” OR soil OR landscape OR “geomorphic hazard” OR Noise OR soundscape OR weather OR Rain OR Sun OR sunshine OR sunlight OR daylength OR …	TS = (mice OR mouse OR rat* OR rodent* OR drosophila)		54552	No	Too many!	Add drosophlia to exclude list. Only removed 400 papers
29	2020-08-07	WoS	TS = (“mental health” OR “mental ill*” OR “mental disorder” OR "wellbeing" OR “general health questionnaire” OR “GHQ” OR “quality of life” OR “QOL” OR “life satisf*” OR “self esteem” OR “self-esteem” OR “Psychological Restor*” OR destress OR “cognitive development” OR “cognitive decline” OR “neurocognitive disorder” OR “neuro-cognitive disorder” OR “Behaviour* problem” OR “Behaviour* disorder” OR…	AND	TS=flood* OR “water inundation” OR “river avulsion” OR Drought OR “water stress” OR “water level” OR “wild fire” OR “bush fire” OR “forest fire” OR “heat wave” OR “air temperature” OR Landslide* OR “climate change” OR “global warming” OR warming OR “sea level rise” OR soil OR landscape OR “geomorphic hazard” OR Noise OR soundscape OR weather OR Rain OR Sun OR sunshine OR sunlight OR daylength OR …	TS = (mice OR mouse OR rat* OR rodent* OR drosophila)		54279	No	Too many!	Change acidifcation to soil, water, lake acidification. Only removed 300 papers
30	2020-08-07	WoS	TS = (“mental health” OR “mental ill*” OR “mental disorder” OR "wellbeing" OR “general health questionnaire” OR “GHQ” OR “quality of life” OR “QOL” OR “life satisf*” OR “self esteem” OR “self-esteem” OR “Psychological Restor*” OR destress OR “cognitive development” OR “cognitive decline” OR “neurocognitive disorder” OR “neuro-cognitive disorder” OR “Behaviour* problem” OR “Behaviour* disorder” OR…	AND	TS=flood* OR “water inundation” OR “river avulsion” OR Drought OR “water stress” OR “water level” OR “wild fire” OR “bush fire” OR “forest fire” OR “heat wave” OR “air temperature” OR Landslide* OR “climate change” OR “global warming” OR warming OR “sea level rise” OR soil OR landscape OR “geomorphic hazard” OR Noise OR soundscape OR weather OR Rain OR Sun OR sunshine OR sunlight OR daylength OR …	TS = (mice OR mouse OR rat* OR rodent* OR drosophila)		54020	No	Too many!	Remove 'depressurisation' and 'depressurization'. Only removed 200. The papers in this set are now largely relevent (not for the final paper list, but logical papers to be returned if you are researching mental health and environmental science). Try limiting to Title, Abstract and Keywords rather than all topic identifiers
31	2020-08-07	WoS	TI = ("mental health" OR "mental ill*" OR "mental disorder" OR wellbeing OR "general health questionnaire" OR "GHQ" OR "quality of life" OR "QOL" OR "life satisf*" OR "self esteem" OR "self-esteem" OR "Psychological Restor*" OR destress OR "cognitive development" OR "cognitive decline" OR "neurocognitive disorder" OR "neuro-cognitive disorder" OR "Behaviour* problem" OR "Behaviour* disorder" OR "…	AND	(TI =(flood* OR “water inundation” OR “river avulsion” OR Drought OR “water stress” OR “water level” OR “wild fire” OR “bush fire” OR “forest fire” OR “heat wave” OR “air temperature” OR Landslide* OR “climate change” OR “global warming” OR warming OR “sea level rise” OR soil OR landscape OR “geomorphic hazard” OR Noise OR soundscape OR weather OR Rain OR Sun OR sunshine OR sunlight OR "day lengt…	TS = (mice OR mouse OR rat* OR rodent* OR drosophila)		39980	No	Too many!	Title, abstract and keywords brings us down to 40,000
32	2020-08-07	WoS	TI = ("mental health" OR "mental ill*" OR "mental disorder" OR wellbeing OR "general health questionnaire" OR "GHQ" OR "quality of life" OR "QOL" OR "life satisf*" OR "self esteem" OR "self-esteem" OR "Psychological Restor*" OR destress OR "cognitive development" OR "cognitive decline" OR "neurocognitive disorder" OR "neuro-cognitive disorder" OR "Behaviour* problem" OR "Behaviour* disorder" OR "…	AND	(TI =(flood* OR “water inundation” OR “river avulsion” OR Drought OR “water stress” OR “water level” OR “wild fire” OR “bush fire” OR “forest fire” OR “heat wave” OR “air temperature” OR Landslide* OR “climate change” OR “global warming” OR warming OR “sea level rise” OR soil OR landscape OR “geomorphic hazard” OR Noise OR soundscape OR weather OR Rain OR Sun OR sunshine OR sunlight OR "day lengt…	TS = (mice OR mouse OR rat* OR rodent* OR drosophila)		39980	No	Too many!	Try removing psych*. This will leave us with only those disorders we specify. But made no difference! Same number of papers. Depression is the most obvious problem. Can try converting to more specific, though this will mean we lose relevent papers.
33	2020-08-07	WoS	TI = ("mental health" OR "mental ill*" OR "mental disorder" OR wellbeing OR "general health questionnaire" OR "GHQ" OR "quality of life" OR "QOL" OR "life satisf*" OR "self esteem" OR "self-esteem" OR "Psychological Restor*" OR destress OR "cognitive development" OR "cognitive decline" OR "neurocognitive disorder" OR "neuro-cognitive disorder" OR "Behaviour* problem" OR "Behaviour* disorder" OR "…	AND	(TI =(flood* OR “water inundation” OR “river avulsion” OR Drought OR “water stress” OR “water level” OR “wild fire” OR “bush fire” OR “forest fire” OR “heat wave” OR “air temperature” OR Landslide* OR “climate change” OR “global warming” OR warming OR “sea level rise” OR soil OR landscape OR “geomorphic hazard” OR Noise OR soundscape OR weather OR Rain OR Sun OR sunshine OR sunlight OR "day lengt…	TS = (mice OR mouse OR rat* OR rodent* OR drosophila)		27987	No	Too many!	replaced depress* with: “Depressive episode” OR “Depressive disorder” OR “clinical depression” OR “depressive symptom*” OR “depression scale” OR “diagnosed depression”. Removed 12,000
34	2020-08-07	WoS	TI = ("mental health" OR "mental ill*" OR "mental disorder" OR "mental health and wellbeing" OR "mental wellbeing" OR "general health questionnaire" OR "GHQ" OR "quality of life" OR "QOL" OR "life satisf*" OR "self esteem" OR "self-esteem" OR "Psychological Restor*" OR destress OR "cognitive development" OR "cognitive decline" OR "neurocognitive disorder" OR "neuro-cognitive disorder" OR "Behavio…	AND	(TI =(flood* OR “water inundation” OR “river avulsion” OR Drought OR “water stress” OR “water level” OR “wild fire” OR “bush fire” OR “forest fire” OR “heat wave” OR “air temperature” OR Landslide* OR “climate change” OR “global warming” OR warming OR “sea level rise” OR soil OR landscape OR “geomorphic hazard” OR Noise OR soundscape OR weather OR Rain OR Sun OR sunshine OR sunlight OR "day lengt…	TS = (mice OR mouse OR rat* OR rodent* OR drosophila)		26222	No	Too many!	Try "mental health and wellbeing" OR "mental wellbeing" in place of wellbing. Removed over 1,000
35	2020-08-07	WoS	TI = (“perceived stress” OR "mental health" OR "mental ill*" OR "mental disorder" OR "mental health and wellbeing" OR "mental wellbeing" OR "general health questionnaire" OR "GHQ" OR "quality of life" OR "QOL" OR "life satisf*" OR "self esteem" OR "self-esteem" OR "Psychological Restor*" OR destress OR "cognitive development" OR "cognitive decline" OR "neurocognitive disorder" OR "neuro-cognitive…	AND	(TI =(flood* OR “water inundation” OR “river avulsion” OR Drought OR “water stress” OR “water level” OR “wild fire” OR “bush fire” OR “forest fire” OR “heat wave” OR “air temperature” OR Landslide* OR “climate change” OR “global warming” OR warming OR “sea level rise” OR soil OR landscape OR “geomorphic hazard” OR Noise OR soundscape OR weather OR Rain OR Sun OR sunshine OR sunlight OR "day lengt…	TS = (mice OR mouse OR rat* OR rodent* OR drosophila)		26281	No	Too many!	Need to add stress back. Added in as 'percieved stress', only 100 extra papers
36	2020-08-07	WoS	TI = (“perceived stress” OR "mental health" OR "mental ill*" OR "mental disorder" OR "mental health and wellbeing" OR "mental wellbeing" OR "general health questionnaire" OR "GHQ" OR "quality of life" OR "QOL" OR "life satisf*" OR "self esteem" OR "self-esteem" OR "Psychological Restor*" OR destress OR "cognitive development" OR "cognitive decline" OR "neurocognitive disorder" OR "neuro-cognitive…	AND	(TI =(flood* OR “water inundation” OR “river avulsion” OR Drought OR “water stress” OR “water level” OR “wild fire” OR “bush fire” OR “forest fire” OR “heat wave” OR “air temperature” OR Landslide* OR “climate change” OR “global warming” OR warming OR “sea level rise” OR soil OR landscape OR “geomorphic hazard” OR Noise OR soundscape OR weather OR Rain OR Sun OR sunshine OR sunlight OR "day lengt…	TS = (mice OR mouse OR rat* OR rodent* OR drosophila)		25322	No	Too many!	Removed invasive species, internalising and externalising symptoms, planetary health, psychosolcial. Removed 1000. Still need to get down to 1/10th of what we have.
37	2020-08-07	WoS	(TI = ( “mental health” OR “mental ill*” OR “mental disorder” OR “general health questionnaire” OR “GHQ” OR “mental health and wellbeing” OR “mental wellbeing” “neurocognitive disorder” OR “neuro-cognitive disorder” OR “Behaviour* problem” OR “Behaviour* disorder” OR “conduct disorder” OR “attention deficit disorder” OR ADHD OR “attention deficit hyperactivity disorder” OR dementia OR Alzheimer’s…	AND	(TI =(flood* OR “water inundation” OR “river avulsion” OR Drought OR “water stress” OR “water level” OR “wild fire” OR “bush fire” OR “forest fire” OR “heat wave” OR “air temperature” OR Landslide* OR “climate change” OR “global warming” OR warming OR “sea level rise” OR soil OR landscape OR “geomorphic hazard” OR Noise OR soundscape OR weather OR Rain OR Sun OR sunshine OR sunlight OR "day lengt…	TS = (mice OR mouse OR rat* OR rodent* OR drosophila)		16208	No	Too many!	Really restrict mental health - remove specifics of wellbeing, removed cog development and decline, remove suicide and self harm, remove alcholo and addict. Only mood disorders, no specifics
38	2020-08-07	WoS	(TI = ( “mental health” OR “mental ill*” OR “mental disorder” OR “general health questionnaire” OR “GHQ” OR “mental health and wellbeing” OR “mental wellbeing” “neurocognitive disorder” OR “neuro-cognitive disorder” OR “Behaviour* problem” OR “Behaviour* disorder” OR “conduct disorder” OR “attention deficit disorder” OR ADHD OR “attention deficit hyperactivity disorder” OR dementia OR Alzheimer’s…	AND	(TI = (flood* OR Drought OR “wild fire” OR “bush fire” OR “forest fire” OR Landslide* OR storm “heat wave” OR “air temperature” OR “climate change” OR “global warming” OR landscape OR Noise OR soundscape OR weather OR daylength OR daylight OR pollut* OR biodivers* OR Tree* OR forest* OR wood* OR Wild* OR “Normalised difference vegetation” OR “NDVI” OR Greenspace OR “green space” OR greenness OR “…	TS = (mice OR mouse OR rat* OR rodent* OR drosophila)		10524	No	Too many!	Really restrict environmental science. Getting there! Need about 1/5th current amount. Options are: limit time, limit geography, further limit env and mh. I don't really want to further restrict env and mh… let's try date
39	2020-08-07	WoS	(TI = ( “mental health” OR “mental ill*” OR “mental disorder” OR “general health questionnaire” OR “GHQ” OR “mental health and wellbeing” OR “mental wellbeing” “neurocognitive disorder” OR “neuro-cognitive disorder” OR “Behaviour* problem” OR “Behaviour* disorder” OR “conduct disorder” OR “attention deficit disorder” OR ADHD OR “attention deficit hyperactivity disorder” OR dementia OR Alzheimer’s…	AND	(TI = (flood* OR Drought OR “wild fire” OR “bush fire” OR “forest fire” OR Landslide* OR storm “heat wave” OR “air temperature” OR “climate change” OR “global warming” OR landscape OR Noise OR soundscape OR weather OR daylength OR daylight OR pollut* OR biodivers* OR Tree* OR forest* OR wood* OR Wild* OR “Normalised difference vegetation” OR “NDVI” OR Greenspace OR “green space” OR greenness OR “…	TS = (mice OR mouse OR rat* OR rodent* OR drosophila)	2000 to today	9734	No	Too many!	Restricting the date helped less than hoped. Try 10 years?
40	2020-08-07	WoS	(TI = ( “mental health” OR “mental ill*” OR “mental disorder” OR “general health questionnaire” OR “GHQ” OR “mental health and wellbeing” OR “mental wellbeing” “neurocognitive disorder” OR “neuro-cognitive disorder” OR “Behaviour* problem” OR “Behaviour* disorder” OR “conduct disorder” OR “attention deficit disorder” OR ADHD OR “attention deficit hyperactivity disorder” OR dementia OR Alzheimer’s…	AND	(TI = (flood* OR Drought OR “wild fire” OR “bush fire” OR “forest fire” OR Landslide* OR storm “heat wave” OR “air temperature” OR “climate change” OR “global warming” OR landscape OR Noise OR soundscape OR weather OR daylength OR daylight OR pollut* OR biodivers* OR Tree* OR forest* OR wood* OR Wild* OR “Normalised difference vegetation” OR “NDVI” OR Greenspace OR “green space” OR greenness OR “…	TS = (mice OR mouse OR rat* OR rodent* OR drosophila)	2010 to today	7610	No	Too many!	10 years still gives far too many papers. Going to repeat very restrictive on mental health and environmental science
41	2020-08-07	WoS	(TI = (“mental health” OR “mental ill*” OR “mental disorder” OR “mental health and wellbeing” OR “mental wellbeing” OR "cognitive development" OR "cognitive decline") OR AB = (“mental health” OR “mental ill*” OR “mental disorder” OR “mental health and wellbeing” OR “mental wellbeing” OR "cognitive development" OR "cognitive decline") OR AK = (“mental health” OR “mental ill*” OR “mental disorder” …	AND	(TI = (flood* OR drought OR “wild fire” OR “bush fire” OR “forest fire” OR Landslide* OR “climate change” OR “global warming” OR landscape OR Noise OR soundscape OR weather OR pollut* OR biodivers*) OR AB = (flood* OR drought OR “wild fire” OR “bush fire” OR “forest fire” OR Landslide* OR “climate change” OR “global warming” OR landscape OR Noise OR soundscape OR weather OR pollut* OR biodivers*)…	TS = (mice OR mouse OR rat* OR rodent* OR drosophila)	1990 to today	1377	Potentially	Realistic number of papers. Could now broaden out environmental science again. Papers look relevent.	Getting there! Going to add back in greenspace and biodiversity.
42	2020-08-07	WoS	((TI = ("mental health" OR "mental ill*" OR "mental disorder" OR "mental health and wellbeing" OR "mental wellbeing" OR "cognitive development" OR "cognitive decline") OR AB = ("mental health" OR "mental ill*" OR "mental disorder" OR "mental health and wellbeing" OR "mental wellbeing" OR "cognitive development" OR "cognitive decline") OR AK = ("mental health" OR "mental ill*" OR "mental disorder"…	AND	(TI = (flood* OR drought OR "wild fire" OR "bush fire" OR "forest fire" OR Landslide* OR "climate change" OR "global warming" OR landscape OR Noise OR soundscape OR weather OR pollut* OR biodivers* OR Tree* OR forest* OR wood* OR Wild* OR Greenspace OR "green space" OR greenness OR "open space" OR park OR "botanic garden" OR greenbelt OR "green belt" OR garden OR yard OR outdoors OR Bluespace OR …	TS = (mice OR mouse OR rat* OR rodent* OR drosophila)	1990 to today	2420	Potentially	Realistic number of papers. Could now broaden out environmental science again. Papers look relevent.	Slightly more than wanted, but that could work. Return to original set and look at alternative set of mental health options.
43	2020-08-07	WoS	(((TI = ("quality of life" OR "QOL" OR "life satisf*" OR "self esteem" OR "self-esteem" OR "Psychological Restor*" OR destress OR "perceived stress" OR "Behaviour* problem" OR "Behaviour* disorder" OR "conduct disorder" OR "attention deficit disorder" OR ADHD OR "attention deficit hyperactivity disorder" OR schizophrenia OR schizotypal OR schizoaffective OR "post-traumatic stress" OR "post trauma…	AND	(TI = (flood* OR drought OR "wild fire" OR "bush fire" OR "forest fire" OR Landslide* OR "climate change" OR "global warming" OR landscape OR Noise OR soundscape OR weather OR pollut* OR biodivers* OR Tree* OR forest* OR wood* OR Wild* OR Greenspace OR "green space" OR greenness OR "open space" OR park OR "botanic garden" OR greenbelt OR "green belt" OR garden OR yard OR outdoors OR Bluespace OR …	TS = (mice OR mouse OR rat* OR rodent* OR drosophila)	1990 to today	8052	No	Too many!	Expanding mental health has ended up with many more. Two options. Limit dates or less mental health options. Look at what restricting dates does.
44	2020-08-07	WoS	(((TI = ("quality of life" OR "QOL" OR "life satisf*" OR "self esteem" OR "self-esteem" OR "Psychological Restor*" OR destress OR "perceived stress" OR "Behaviour* problem" OR "Behaviour* disorder" OR "conduct disorder" OR "attention deficit disorder" OR ADHD OR "attention deficit hyperactivity disorder" OR schizophrenia OR schizotypal OR schizoaffective OR "post-traumatic stress" OR "post trauma…	AND	(TI = (flood* OR drought OR "wild fire" OR "bush fire" OR "forest fire" OR Landslide* OR "climate change" OR "global warming" OR landscape OR Noise OR soundscape OR weather OR pollut* OR biodivers* OR Tree* OR forest* OR wood* OR Wild* OR Greenspace OR "green space" OR greenness OR "open space" OR park OR "botanic garden" OR greenbelt OR "green belt" OR garden OR yard OR outdoors OR Bluespace OR …	TS = (mice OR mouse OR rat* OR rodent* OR drosophila)	2010 to today	6266	No	Too many!	Restricting to 10 years didn't help. Look at more restrictive mental health
45	2020-08-07	WoS	TI = (“mental health and wellbeing" OR "mental wellbeing" OR “attention deficit disorder” OR ADHD OR “attention deficit hyperactivity disorder” OR schizophrenia OR schizotypal OR schizoaffective OR "post-traumatic stress" OR "post traumatic stress" OR PTSD OR anxiety OR anxious OR “Depressive episode” OR “Depressive disorder” OR “clinical depression” OR “depressive symptom*” OR “depression scale”…	AND	(TI = (flood* OR drought OR "wild fire" OR "bush fire" OR "forest fire" OR Landslide* OR "climate change" OR "global warming" OR landscape OR Noise OR soundscape OR weather OR pollut* OR biodivers* OR Tree* OR forest* OR wood* OR Wild* OR Greenspace OR "green space" OR greenness OR "open space" OR park OR "botanic garden" OR greenbelt OR "green belt" OR garden OR yard OR outdoors OR Bluespace OR …	TS = (mice OR mouse OR rat* OR rodent* OR drosophila)	2010 to today	2790	Potentially	Manageable number, but maybe less relevent than broad mental health.	Replaced specifics of wellbeing with "mental health and wellbeing" and "mental wellbeing". This gives a similar number to before, but seems slightly less relevent in looking at initial results.
46	2020-08-07	WoS	TI = (“mental health and wellbeing" OR "mental wellbeing" OR “attention deficit disorder” OR ADHD OR “attention deficit hyperactivity disorder” OR schizophrenia OR schizotypal OR schizoaffective OR "post-traumatic stress" OR "post traumatic stress" OR PTSD OR anxiety OR anxious OR “Depressive episode” OR “Depressive disorder” OR “clinical depression” OR “depressive symptom*” OR “depression scale”…	AND	(TI = (flood* OR drought OR "wild fire" OR "bush fire" OR "forest fire" OR Landslide* OR "climate change" OR "global warming" OR landscape OR Noise OR soundscape OR weather OR pollut* OR biodivers* OR Tree* OR forest* OR wood* OR Wild* OR Greenspace OR "green space" OR greenness OR "open space" OR park OR "botanic garden" OR greenbelt OR "green belt" OR garden OR yard OR outdoors OR Bluespace OR …	TS = (mice OR mouse OR rat* OR rodent* OR drosophila)	1990 to today	3651	Potentially	Manageable number, but maybe less relevent than broad mental health.	Expnading back to 1990
47	2020-08-07	WoS	((TI = ("mental health" OR "mental ill*" OR "mental disorder" OR "mental health and wellbeing" OR "mental wellbeing" OR "cognitive development" OR "cognitive decline") OR AB = ("mental health" OR "mental ill*" OR "mental disorder" OR "mental health and wellbeing" OR "mental wellbeing" OR "cognitive development" OR "cognitive decline") OR AK = ("mental health" OR "mental ill*" OR "mental disorder"…	AND	(TI = (flood* OR drought OR "wild fire" OR "bush fire" OR "forest fire" OR Landslide* OR "climate change" OR "global warming" OR landscape OR Noise OR soundscape OR weather OR pollut* OR biodivers* OR Tree* OR forest* OR wood* OR Wild* OR Greenspace OR "green space" OR greenness OR "open space" OR park OR "botanic garden" OR greenbelt OR "green belt" OR garden OR yard OR outdoors OR Bluespace OR …	TS = (mice OR mouse OR rat* OR rodent* OR drosophila)	2010 to today	1991	Potentially	Realistic number of papers, papers look relevent	Repeat of 42 but with restricted dates to 2010.
48	2020-08-10	WoS	((TI = ("mental health" OR "mental ill*" OR "mental disorder" OR "mental health and wellbeing" OR "mental wellbeing" OR "cognitive development" OR "cognitive decline") OR AB = ("mental health" OR "mental ill*" OR "mental disorder" OR "mental health and wellbeing" OR "mental wellbeing" OR "cognitive development" OR "cognitive decline") OR AK = ("mental health" OR "mental ill*" OR "mental disorder"…	AND	(TI = (flood* OR drought OR "wild fire" OR "bush fire" OR "forest fire" OR Landslide* OR "climate change" OR "global warming" OR landscape OR Noise OR soundscape OR weather OR pollut* OR biodivers* OR Tree* OR forest* OR wood* OR Wild* OR Greenspace OR "green space" OR greenness OR "open space" OR park OR "botanic garden" OR greenbelt OR "green belt" OR garden OR yard OR outdoors OR Bluespace OR …	TS = (mice OR mouse OR rat* OR rodent* OR drosophila)	2010 to today	2103	Potentially	Realistic number of papers, papers look relevent	Adding 'natural environment', 'natural land', 'natural space', 'natural area' as a replacement for 'nature'. Still OK number!
49	2020-08-10	WoS	((TI = ("mental health" OR "mental ill*" OR "mental disorder" OR "mental health and wellbeing" OR "mental wellbeing" OR "cognitive development" OR "cognitive decline") OR AB = ("mental health" OR "mental ill*" OR "mental disorder" OR "mental health and wellbeing" OR "mental wellbeing" OR "cognitive development" OR "cognitive decline") OR AK = ("mental health" OR "mental ill*" OR "mental disorder"…	AND	(TI = (flood* OR drought OR "wild fire" OR "bush fire" OR "forest fire" OR Landslide* OR "climate change" OR "global warming" OR landscape OR Noise OR soundscape OR weather OR pollut* OR biodivers* OR Tree* OR forest* OR wood* OR Wild* OR Greenspace OR "green space" OR greenness OR "open space" OR park OR "botanic garden" OR greenbelt OR "green belt" OR garden OR yard OR outdoors OR Bluespace OR …	TS = (mice OR mouse OR rat* OR rodent* OR drosophila)	2010 to today	2126	Potentially	Realistic number of papers, papers look relevent	Adding environmental greif papers back. Only adds an additional 20 papers
50	2020-08-10	WoS	(TI = ("mental health" OR "mental ill*" OR "mental disorder" OR "mental health and wellbeing" OR "mental wellbeing" OR "cognitive development" OR "cognitive decline") OR AB = ("mental health" OR "mental ill*" OR "mental disorder" OR "mental health and wellbeing" OR "mental wellbeing" OR "cognitive development" OR "cognitive decline") OR AK = ("mental health" OR "mental ill*" OR "mental disorder" …	AND	(TI = (flood* OR drought OR "wild fire" OR "bush fire" OR "forest fire" OR Landslide* OR "climate change" OR "global warming" OR landscape OR Noise OR soundscape OR weather OR pollut* OR biodivers* OR Tree* OR forest* OR wood* OR Wild* OR "natural environment" OR "natural land" OR "natural space" OR "natural area" ) OR AB = (flood* OR drought OR "wild fire" OR "bush fire" OR "forest fire" OR Land…	TS = (mice OR mouse OR rat* OR rodent* OR drosophila)	2010 to today	1774	Potentially	Realistic number of papers, papers look relevent	Removing greenspace (already covered in other reviews) and climate greif (less relevent)
51	2020-08-10	WoS	(TI = ("mental health" OR "mental ill*" OR "mental disorder" OR "mental health and wellbeing" OR "mental wellbeing" OR "cognitive development" OR "cognitive decline" OR demintia OR schizophrenia OR schizotypal OR "mood disorder" OR "neurotic disorder" OR "stress disorder" OR "somatoform disorder" OR "substance abuse" OR "behaviour disorder" OR "personality disorder") OR AB = ("mental health" OR "…	AND	(TI = (flood* OR drought OR "wild fire" OR "bush fire" OR "forest fire" OR Landslide* OR "climate change" OR "global warming" OR landscape OR Noise OR soundscape OR weather OR pollut* OR biodivers* OR Tree* OR forest* OR wood* OR Wild* OR "natural environment" OR "natural land" OR "natural space" OR "natural area" ) OR AB = (flood* OR drought OR "wild fire" OR "bush fire" OR "forest fire" OR Land…	TS = (mice OR mouse OR rat* OR rodent* OR drosophila)	2010 to today	3060	no	too high	Trying addition of ICD higher level disorders. A bit high.
52	2020-08-10	WoS	(TI = ("mental health" OR "mental ill*" OR "mental disorder" OR "mental health and wellbeing" OR "mental wellbeing" OR "cognitive development" OR "cognitive decline" OR dementia OR schizophrenia OR schizotypal OR "mood disorder" OR "stress disorder" OR "substance abuse" ) OR AB = ("mental health" OR "mental ill*" OR "mental disorder" OR "mental health and wellbeing" OR "mental wellbeing" OR "cogn…	AND	(TI = (flood* OR drought OR "wild fire" OR "bush fire" OR "forest fire" OR Landslide* OR "climate change" OR "global warming" OR landscape OR Noise OR soundscape OR weather OR pollut* OR biodivers* OR Tree* OR forest* OR wood* OR Wild* OR "natural environment" OR "natural land" OR "natural space" OR "natural area" ) OR AB = (flood* OR drought OR "wild fire" OR "bush fire" OR "forest fire" OR Land…	TS = (mice OR mouse OR rat* OR rodent* OR drosophila)	2010 to today	3036	No	Too high	Trying addition of ICD higher level disorders, but only those identified by our workshops. Still to many papers
53	2020-08-10	WoS	(TI = ("mental health" OR "mental ill*" OR "mental disorder" OR "mental health and wellbeing" OR "mental wellbeing" OR "cognitive development" OR "cognitive decline" OR dementia OR schizophrenia OR "Depressive episode" OR "Depressive disorder" OR "clinical depression" OR "depressive symptom*" OR "depression scale" OR "diagnosed depression" OR anxiety OR autism OR biplolar OR "substance abuse" ) O…	AND	(TI = (flood* OR drought OR "wild fire" OR "bush fire" OR "forest fire" OR Landslide* OR "climate change" OR "global warming" OR landscape OR Noise OR soundscape OR weather OR pollut* OR biodivers* OR Tree* OR forest* OR wood* OR Wild* OR "natural environment" OR "natural land" OR "natural space" OR "natural area" ) OR AB = (flood* OR drought OR "wild fire" OR "bush fire" OR "forest fire" OR Land…	TS = (mice OR mouse OR rat* OR rodent* OR drosophila)	2010 to today	4948	No	Too high	Trying addition of Bratman et al disorders. Too many.
54	2020-08-10	WoS	(TI = ("mental health" OR "mental ill*" OR "mental disorder" OR "mental health and wellbeing" OR "mental wellbeing" OR "cognitive development" OR "cognitive decline" OR dementia OR "mood disorders" OR "psychotic disorders" OR "anxiety" OR "substance abuse" ) OR AB = ("mental health" OR "mental ill*" OR "mental disorder" OR "mental health and wellbeing" OR "mental wellbeing" OR "cognitive developm…	AND	(TI = (flood* OR drought OR "wild fire" OR "bush fire" OR "forest fire" OR Landslide* OR "climate change" OR "global warming" OR landscape OR Noise OR soundscape OR weather OR pollut* OR biodivers* OR Tree* OR forest* OR wood* OR Wild* OR "natural environment" OR "natural land" OR "natural space" OR "natural area" ) OR AB = (flood* OR drought OR "wild fire" OR "bush fire" OR "forest fire" OR Land…	TS = (mice OR mouse OR rat* OR rodent* OR drosophila)	2010 to today	3651	No	Too high	Trying addition of Fineberg most costly disorders: dementia, mood disorders, psychotic disorders, anxiety, addiction. Still too many.
55	2020-08-10	WoS	(TI = ("mental health" OR "mental ill*" OR "mental disorder" OR "mental health and wellbeing" OR "mental wellbeing" OR "cognitive development" OR "cognitive decline" OR "psychotic disorders" ) OR AB = ("mental health" OR "mental ill*" OR "mental disorder" OR "mental health and wellbeing" OR "mental wellbeing" OR "cognitive development" OR "cognitive decline" OR "psychotic disorders" OR ) OR AK = …	AND	(TI = (flood* OR drought OR "wild fire" OR "bush fire" OR "forest fire" OR Landslide* OR "climate change" OR "global warming" OR landscape OR Noise OR soundscape OR weather OR pollut* OR biodivers* OR Tree* OR forest* OR wood* OR Wild* OR "natural environment" OR "natural land" OR "natural space" OR "natural area" ) OR AB = (flood* OR drought OR "wild fire" OR "bush fire" OR "forest fire" OR Land…	TS = (mice OR mouse OR rat* OR rodent* OR drosophila)	2010 to today	1788	Potentially	Manageable number	Trying just addition of psychotic disorders (which inc schizophrenia) as recognised as often missed. Still acceptable numbers.
56	2020-08-10	WoS	(TI = ("mental health" OR "mental ill*" OR "mental disorder" OR "mental health and wellbeing" OR "mental wellbeing" OR "cognitive development" OR "cognitive decline" OR "psychotic disorders") OR AB = ("mental health" OR "mental ill*" OR "mental disorder" OR "mental health and wellbeing" OR "mental wellbeing" OR "cognitive development" OR "cognitive decline" OR "psychotic disorders") OR AK = ("men…	AND	(TI = (flood* OR drought OR "wild fire" OR "bush fire" OR "forest fire" OR Landslide* OR "climate change" OR "global warming" OR landscape OR Noise OR soundscape OR weather OR pollut* OR biodivers* OR Tree* OR forest* OR wood* OR Wild* OR "natural environment" OR "natural land" OR "natural space" OR "natural area" OR"air quality" OR "water quality") OR AB = (flood* OR drought OR "wild fire" OR "b…	TS = (mice OR mouse OR rat* OR rodent* OR drosophila)	2010 to today	1803	Potentially	Manageable number	Now playing with adding in further environmental science words. Ad "water quality" and "air quality".
57	2020-08-10	WoS	(TI = ("mental health" OR "mental ill*" OR "mental disorder" OR "mental health and wellbeing" OR "mental wellbeing" OR "cognitive development" OR "cognitive decline" OR "psychotic disorders") OR AB = ("mental health" OR "mental ill*" OR "mental disorder" OR "mental health and wellbeing" OR "mental wellbeing" OR "cognitive development" OR "cognitive decline" OR "psychotic disorders") OR AK = ("men…	AND	(TI = (flood* OR drought OR "wild fire" OR "bush fire" OR "forest fire" OR Landslide* OR "climate change" OR "global warming" OR landscape OR Noise OR soundscape OR weather OR pollut* OR biodivers* OR Tree* OR forest* OR wood* OR Wild* OR "natural environment" OR "natural land" OR "natural space" OR "natural area" OR"air quality" OR "water quality" OR ecosystem) OR AB = (flood* OR drought OR "wil…	TS = (mice OR mouse OR rat* OR rodent* OR drosophila)	2010 to today	1867	Potentially	Manageable number	Now playing with adding in further environmental science words. Ad ecosystem - to capture environmental science lost through excluding greenspace
58	2020-08-10	WoS	(TI = ("mental health" OR "mental ill*" OR "mental disorder" OR "mental health and wellbeing" OR "mental wellbeing" OR "cognitive development" OR "cognitive decline" OR "psychotic disorders") OR AB = ("mental health" OR "mental ill*" OR "mental disorder" OR "mental health and wellbeing" OR "mental wellbeing" OR "cognitive development" OR "cognitive decline" OR "psychotic disorders") OR AK = ("men…	AND	(TI = (flood* OR drought OR "wild fire" OR "bush fire" OR "forest fire" OR Landslide* OR "climate change" OR "global warming" OR landscape OR Noise OR soundscape OR weather OR pollut* OR biodivers* OR Tree* OR forest* OR wood* OR Wild* OR "natural environment" OR "natural land" OR "natural space" OR "natural area" OR"air quality" OR "water quality" OR ecosystem OR soil OR lake OR river OR ocean O…	TS = (mice OR mouse OR rat* OR rodent* OR drosophila)	2010 to today	2234	No	Too many, though potentially if really needed?	Now playing with adding in further environmental science words. Ad landscape words: soil OR lake OR river OR ocean OR sea OR coast OR mountain OR beach OR dune OR waterfall. A bit too high
59	2020-08-10	WoS	(TI = ("mental health" OR "mental ill*" OR "mental disorder" OR "mental health and wellbeing" OR "mental wellbeing" OR "cognitive development" OR "cognitive decline" OR "psychotic disorders") OR AB = ("mental health" OR "mental ill*" OR "mental disorder" OR "mental health and wellbeing" OR "mental wellbeing" OR "cognitive development" OR "cognitive decline" OR "psychotic disorders") OR AK = ("men…	AND	(TI = (flood* OR drought OR "wild fire" OR "bush fire" OR "forest fire" OR Landslide* OR "climate change" OR "global warming" OR landscape OR Noise OR soundscape OR pollut* OR biodivers* OR Tree* OR forest* OR wood* OR Wild* OR "natural environment" OR "natural land" OR "natural space" OR "natural area" OR"air quality" OR "water quality" OR ecosystem OR soil OR lake OR river OR ocean OR sea OR co…	TS = (mice OR mouse OR rat* OR rodent* OR drosophila)	2010 to today	2177	No	Too many, though potentially if really needed?	Try removing weather? Still a bit high
60	2020-08-10	WoS	(TI = ("mental health" OR "mental ill*" OR "mental disorder" OR "mental health and wellbeing" OR "mental wellbeing" OR "cognitive development" OR "cognitive decline" OR "psychotic disorders") OR AB = ("mental health" OR "mental ill*" OR "mental disorder" OR "mental health and wellbeing" OR "mental wellbeing" OR "cognitive development" OR "cognitive decline" OR "psychotic disorders") OR AK = ("men…	AND	(TI = (flood* OR drought OR "wild fire" OR "bush fire" OR "forest fire" OR Landslide* OR "climate change" OR "global warming" OR landscape OR Noise OR soundscapeOR pollut* OR biodivers* OR Tree* OR forest* OR wood* OR Wild* OR "natural environment" OR "natural land" OR "natural space" OR "natural area" OR"air quality" OR "water quality" OR ecosystem OR erosion) OR AB = (flood* OR drought OR "wild…	TS = (mice OR mouse OR rat* OR rodent* OR drosophila)	2010 to today	1856	Potentially	Manageable number	Remove landscape words and weather but add erosion. This returns 2327 from PubMed.
61	2020-08-10	WoS	((TI = ("mental health" OR "mental ill*" OR "mental disorder" OR "mental health and wellbeing" OR "mental wellbeing" OR "cognitive development" OR "cognitive decline" OR "psychotic disorders") OR AB = ("mental health" OR "mental ill*" OR "mental disorder" OR "mental health and wellbeing" OR "mental wellbeing" OR "cognitive development" OR "cognitive decline" OR "psychotic disorders") OR AK = ("me…	AND	(TI = (flood* OR drought OR "wild fire" OR "bush fire" OR "forest fire" OR Landslide* OR "climate change" OR "global warming" OR landscape OR Noise OR soundscape OR pollut* OR biodivers* OR Tree* OR forest* OR wood* OR Wild* OR "natural environment" OR "natural land" OR "natural space" OR "natural area" OR"air quality" OR "water quality" OR ecosystem OR lake OR river OR ocean OR sea OR coast OR m…	TS = (mice OR mouse OR rat* OR rodent* OR drosophila)	2010 to today	2088	Potentially	Manageable number	Landscape words excuding soil
62	2020-08-10	WoS	((TI = ("mental health" OR "mental ill*" OR "mental disorder" OR "mental health and wellbeing" OR "mental wellbeing" OR "cognitive development" OR "cognitive decline" OR "psychotic disorders") OR AB = ("mental health" OR "mental ill*" OR "mental disorder" OR "mental health and wellbeing" OR "mental wellbeing" OR "cognitive development" OR "cognitive decline" OR "psychotic disorders") OR AK = ("me…		TI = (flood* OR drought OR "wild fire" OR "bush fire" OR "forest fire" OR Landslide* OR "climate change" OR "global warming" OR landscape OR Noise OR soundscape OR pollut* OR biodivers* OR Tree* OR forest* OR wood* OR Wild* OR "natural environment" OR "natural land" OR "natural space" OR "natural area" OR"air quality" OR "water quality" OR ecosystem OR lake OR river OR coastal OR erosion) OR AB =…	TS = (mice OR mouse OR rat* OR rodent* OR drosophila)	2010 to today	1886			Wider landscape words - coastal, lake river, landscape - but excluding soil, mountain, coast, dune, beach, sea, ocean and waterfall
63	2020-08-10	WoS	((TI = ("mental health" OR "mental ill*" OR "mental disorder" OR "mental health and wellbeing" OR "mental wellbeing" OR "cognitive development" OR "cognitive decline") OR AB = ("mental health" OR "mental ill*" OR "mental disorder" OR "mental health and wellbeing" OR "mental wellbeing" OR "cognitive development" OR "cognitive decline") OR AK = ("mental health" OR "mental ill*" OR "mental disorder"…		(TI = (flood* OR drought OR "wild fire" OR "bush fire" OR "forest fire" OR Landslide* OR "climate change" OR "global warming" OR landscape OR Noise OR soundscape OR pollut* OR biodivers* OR Tree* OR forest* OR wood* OR Wild* OR "natural environment" OR "natural land" OR "natural space" OR "natural area" OR"air quality" OR "water quality" OR ecosystem OR lake OR river OR coastal OR erosion) OR AB …	TS = (mice OR mouse OR rat* OR rodent* OR drosophila)	2010 to today	1873			Remove psychotic
64	2020-08-10	WoS	(TI = ("mental health" OR "mental ill*" OR "mental disorder" OR "mental health and wellbeing" OR "mental wellbeing" OR "cognitive development" OR "cognitive decline" OR "psychopatholog*" OR "psychiatric" ) OR AB = ("mental health" OR "mental ill*" OR "mental disorder" OR "mental health and wellbeing" OR "mental wellbeing" OR "cognitive development" OR "cognitive decline" OR "psychopatholog*" OR "…		(TI = (flood* OR drought OR "wild fire" OR "bush fire" OR "forest fire" OR Landslide* OR "climate change" OR "global warming" OR landscape OR Noise OR soundscape OR pollut* OR biodivers* OR Tree* OR forest* OR wood* OR Wild* OR "natural environment" OR "natural land" OR "natural space" OR "natural area" OR"air quality" OR "water quality" OR ecosystem OR lake OR river OR coastal OR erosion) OR AB …	TS = (mice OR mouse OR rat* OR rodent* OR drosophila)	2010 to today	2451			Add "psychiatric" OR "psychopatholog*"
64	2020-08-10	WoS	((TI = ("mental health" OR "mental ill*" OR "mental disorder" OR "mental health and wellbeing" OR "mental wellbeing" OR "cognitive development" OR "cognitive decline" OR "psychopatholog*" ) OR AB = ("mental health" OR "mental ill*" OR "mental disorder" OR "mental health and wellbeing" OR "mental wellbeing" OR "cognitive development" OR "cognitive decline" OR "psychopatholog*" ) OR AK = ("mental h…		(TI = (flood* OR drought OR "wild fire" OR "bush fire" OR "forest fire" OR Landslide* OR "climate change" OR "global warming" OR landscape OR Noise OR soundscape OR pollut* OR biodivers* OR Tree* OR forest* OR wood* OR Wild* OR "natural environment" OR "natural land" OR "natural space" OR "natural area" OR"air quality" OR "water quality" OR ecosystem OR lake OR river OR coastal OR erosion) OR AB …	TS = (mice OR mouse OR rat* OR rodent* OR drosophila)	2010 to today	1975	Yes		Remove psychiatri
65	2020-08-10	WoS	(TI = ("mental health" OR "mental ill*" OR "mental disorder" OR "mental health and wellbeing" OR "mental wellbeing" OR "cognitive development" OR "cognitive decline"OR "psychopatholog*" ) OR AB = ("mental health" OR "mental ill*" OR "mental disorder" OR "mental health and wellbeing" OR "mental wellbeing" OR "cognitive development" OR "cognitive decline" OR "psychopatholog*") OR AK = ("mental heal…		(TI = (flood* OR drought OR "wild fire" OR "bush fire" OR "forest fire" OR Landslide* OR "climate change" OR "global warming" OR landscape OR Noise OR soundscape OR pollut* OR biodivers* OR Tree* OR forest* OR wood* OR Wild* OR "natural environment" OR "natural land" OR "natural space" OR "natural area" OR"air quality" OR "water quality" OR ecosystem OR lake OR river OR coastal OR erosion) OR AB …	TS = (mice OR mouse OR rat* OR rodent* OR drosophila)	2010 to today	2365	No		Remove psycolog but keep psychiatric
66	2020-08-11	Pubmed	((("mental health"[Title/Abstract] OR "mental ill*"[Title/Abstract] OR "mental disorder"[Title/Abstract] OR "mental wellbeing"[Title/Abstract] OR "cognitive development"[Title/Abstract] OR "cognitive decline"[Title/Abstract] OR [Title/Abstract]) AND )) NOT (mice OR mouse OR rat OR rats OR rodent* OR drosophila))		(flood*[Title/Abstract] OR drought[Title/Abstract] OR "wild fire"[Title/Abstract] OR "bush fire"[Title/Abstract] OR "forest fire"[Title/Abstract] OR Landslide*[Title/Abstract] OR "climate change"[Title/Abstract] OR "global warming"[Title/Abstract] OR landscape[Title/Abstract] OR Noise[Title/Abstract] OR soundscape[Title/Abstract] OR pollut*[Title/Abstract] OR biodivers*[Title/Abstract] OR Tree*[T…	(mice OR mouse OR rat OR rats OR rodent* OR drosophila)	2011 to today	2022	Yes		Same serach string in PubMed
67	2020-08-13	Brirish Library	"mental health" OR "mental ill*" OR "mental disorder" OR "mental health and wellbeing" OR "mental wellbeing" OR "cognitive development" OR "cognitive decline" OR "psychopatholog*"		flood* OR drought OR "wild fire" OR "bush fire" OR "forest fire" OR Landslide* OR "climate change" OR "global warming" OR landscape OR Noise OR soundscape OR pollut* OR biodivers* OR Tree* OR forest* OR wood* OR Wild* OR "natural environment" OR "natural land" OR "natural space" OR "natural area" OR"air quality" OR "water quality" OR ecosystem OR lake OR river OR coastal OR erosion	mice OR mouse OR rat* OR rodent* OR drosophila	2010 to today	370	Yes

## Sheet: Table Info
Date	Where searched	Search string	Number of papers	Accepted?	Rationale	Comments
Date of search	Name of database	Exact search string used	Number of papers found with search string	Is this the final search string?	Why string accepted or rejected, including edits made to next string	Additional comments
