# Supplementary material for: The Contribution of Environmental Science to Mental Health Research: A Scoping Review
Source: Int J Environ Res Public Health. 2023 Mar 27;20(7):5278. doi: 10.3390/ijerph20075278 (PMC10094550; doi:10.3390/ijerph20075278)
Supplement: Supplementary file 1 [file ijerph-20-05278-s001.zip › Table S2 - Screening Record - Supplementary Materials.xlsx]

## Sheet: Table S2
Screening record for review of environmental science contribution to mental health research. For search strings see separate file.
Stage	Papers added	Papers rejected	Total papers
Original search (WoS)	1975		1975
Original search (PubMed)	2022		3997
Removal of duplicates		1234	2763
Original search (UK Gov)	4		2767
Original search (Scot Gov)	0		2767
Original search (NI Gov)	0		2767
Original search (Welsh Gov)	0		2767
Original search (EU)	0		2767
Original search (British Library)	9		2776
Title screening		1274	1502
Abstract screening		908	594
Removed: Greenspace		121	473
Removed: Air pollution		98	375
Removed: Flooding		75	300
Removed: Climate Change		35	265
Inaccessible papers		10	255
Full text screening		53	202

## Sheet: Table Info
Stage	Papers added	Papers rejected	Total papers
Review stage. Separate line for each database searched.	Number of papers added at this stage (can be 0 for some stages e.g. title screening)	Number of papers rejected at this stage (can be 0 for some stages e.g. original search)	Total number of papers
