# Supplementary material for: The Contribution of Environmental Science to Mental Health Research: A Scoping Review
Source: Int J Environ Res Public Health. 2023 Mar 27;20(7):5278. doi: 10.3390/ijerph20075278 (PMC10094550; doi:10.3390/ijerph20075278)
Supplement: Supplementary file 1 [file ijerph-20-05278-s001.zip › Table S3 - All Returned Papers - Supplementary Materials.csv]

All papers returned following search of Web of Science and PubMed for scoping review of environmental science contribution to mental health research, including duplications. For search string see separate document.
	Authors	Publication.Year	Title	Publication	DOI	Database	dup
3734	Temte JL, Holzhauer JR, Kushner KP.	2019	Correlation Between Climate Change and Dysphoria in Primary Care	WMJ	x	PubMed	NA
3735	Parker CL, Wellbery CE, Mueller M.	2019	The Changing Climate: Managing Health Impacts	Am Fam Physician	x	PubMed	NA
3736	Shorthouse M, Stone L.	2018	Inequity amplified: climate change, the Australian farmer, and mental health	Med J Aust	x	PubMed	NA
3737	Zhang Y, Beggs PJ, Bambrick H, Berry HL, Linnenluecke MK, Trueck S, Alders R, Bi P, Boylan SM, Green D, Guo Y, Hanigan IC, Hanna EG, Malik A, Morgan GG, Stevenson M, Tong S, Watts N, Capon AG.	2018	The MJA-Lancet Countdown on health and climate change: Australian policy inaction threatens lives	Med J Aust	x	PubMed	NA
3738	Randolph R, Chacko S, Morsch G.	2019	Disaster Medicine: Public Health Threats Associated With Disasters	FP Essent	x	PubMed	NA
3739	Hijar G, Bonilla C, Munayco CV, Gutierrez EL, Ramos W.	2016	[El ni??o phenomenon and natural disasters: public health interventions for disaster preparedness and response]	Rev Peru Med Exp Salud Publica	x	PubMed	NA
3740	Kohen DE, Bougie E, Gu?�vremont A.	2015	Housing and health among Inuit children	Health Rep	x	PubMed	NA
3741	Pashkov VM, Trotska MV.	2019	Natural environment as component of public health: some aspects of its legal regulation	Wiad Lek	x	PubMed	NA
3742	Austin EK, Handley T, Kiem AS, Rich JL, Lewin TJ, Askland HH, Askarimarnani SS, Perkins DA, Kelly BJ.	2018	Drought-related stress among farmers: findings from the Australian Rural Mental Health Study	Med J Aust	x	PubMed	NA
3743	Falconer E, El-Hay T, Alevras D, Docherty J, Yanover C, Kalton A, Goldschmidt Y, Rosen-Zvi M.	2014	Integrated multisystem analysis in a mental health and criminal justice ecosystem	AMIA Annu Symp Proc	x	PubMed	NA
3744	Ng FY, Wilson LA, Veitch C.	2015	Climate adversity and resilience: the voice of rural Australia	Rural Remote Health	x	PubMed	NA
3745	Gunn KM, Kettler LJ, Skaczkowski GL, Turnbull DA.	2012	Farmers' stress and coping in a time of drought	Rural Remote Health	x	PubMed	NA
3746	Johnson IR, McDonnell C, O'Connell AM, Glynn LG.	2011	Patient perspectives on health, health needs, and health care services in a rural Irish community: a qualitative study	Rural Remote Health	x	PubMed	NA
3747	Parton D.	2015	Significant changes to the mental health landscape--some good, some not so good	Ment Health Today	x	PubMed	NA
3748	Bond T.	2010	Comparing decalage and development with cognitive developmental tests	J Appl Meas	x	PubMed	NA
3749	Tanielian T, Hansen ML, Martin LT, Grimm G, Ogletree C.	2016	Supporting the Mental Health Needs of Veterans in the Metro Detroit Area	Rand Health Q	x	PubMed	NA
3750	Syed Sheriff RJ, Reggi M, Mohamed A, Haibe F, Whitwell S, Jenkins R.	2011	Mental health in Somalia	Int Psychiatry	x	PubMed	NA
3751	Otsuka K, Sakai A, Nakamura H, Akahira M.	2013	[Mental health activities following the Great East Japan Earthquake in the stricken coastal area of Iwate Prefecture]	Seishin Shinkeigaku Zasshi	x	PubMed	NA
3752	Kretzschmar I, Nyan O, Mendy AM, Janneh B.	2012	Mental health in the Republic of The Gambia	Int Psychiatry	x	PubMed	NA
3753	Hossain D, Gorman D, Eley R, Coutts J.	2010	Value of mental health first aid training of advisory and extension agents in supporting farmers in rural Queensland	Rural Remote Health	x	PubMed	NA
3754	Makopa Kenda I, Agoub M, Ahami AO.	2014	[Noise Effects on Mental Health: a review of literature]	Sante Ment Que	x	PubMed	NA
3755	Matsuoka H.	2012	[The Great East Japan earthquake and mid- and long-term prospect for mental health and welfare in Miyagi Prefecture]	Seishin Shinkeigaku Zasshi	x	PubMed	NA
3756	Krawisz B.	2020	Health Effects of Climate Destabilization: Understanding the Problem	WMJ	x	PubMed	NA
3757	Percy-Smith L, Wischmann S, Josvassen JL, Hallstr?�m M, Laplante-L?�vesque A, Sorgenfrei MG, Caye-Thomasen P.	2020	Evaluation of a sentence test in noise in children with hearing impairment	Dan Med J	x	PubMed	NA
3758	Mahomed F.	2020	Addressing the Problem of Severe Underinvestment in Mental Health and Well-Being from a Human Rights Perspective	Health Hum Rights	x	PubMed	NA
3759	Reynolds CA, Gatz M, Pedersen NL, Prince JA.	2011	An assessment of CETP sequence variation in relation to cognitive decline and dementia risk	Int J Mol Epidemiol Genet	x	PubMed	NA
3760	Ramchand R, Jaycox LH, Ebener PA.	2017	Suicide Prevention Hotlines in California: Diversity in Services, Structure, and Organization and the Potential Challenges Ahead	Rand Health Q	x	PubMed	NA
3761	Maillard I.	2011	[Key elements of the evolution of adolescent mental health policies]	Sante Publique	x	PubMed	NA
3762	Sidandi P, Opondo P, Tidimane S.	2011	Mental health in Botswana	Int Psychiatry	x	PubMed	NA
3763	Matsumoto K.	2014	[Mental health care systems and provisions in the immediate and acute phase of the Great East Japan Earthquake: situational and support activities in Miyagi Prefecture]	Seishin Shinkeigaku Zasshi	x	PubMed	NA
3764	Chan EJ, McNiel DE, Binder RL.	2016	Sex Offenders in the Digital Age	J Am Acad Psychiatry Law	x	PubMed	NA
3765	Diaz JH.	2011	The legacy of the Gulf oil spill: analyzing acute public health effects and predicting chronic ones in Louisiana	Am J Disaster Med	x	PubMed	NA
3766	Kingdom SE, Smith AP.	2011	Psychosocial risk factors for work-related stress in Her Majesty's Coastguard	Int Marit Health	x	PubMed	NA
3767	D'Alessandro D, Buffoli M, Capasso L, Fara GM, Rebecchi A, Capolongo S; Hygiene on Built EnvironmentWorking Group on Healthy Buildings of the Italian Society of Hygiene, Preventive Medicine and Public Health (SItI).	2015	Green areas and public health: improving wellbeing and physical activity in the urban context	Epidemiol Prev	x	PubMed	NA
3768	Li YH, Qu LN, Chen HL.	2013	[Space stress injury and related protective measures]	Sheng Li Ke Xue Jin Zhan	x	PubMed	NA
3769	Qi B, Dong R, Li X, Gao W, Liu B.	2015	[The effect of improving the physical and mental health on different rehabilitation programs for post-linguistic cochlear implantees]	Lin Chung Er Bi Yan Hou Tou Jing Wai Ke Za Zhi	x	PubMed	NA
3770	Jeurissen PP, Ravesteijn BA, Janssen RT, Tanke MA.	2016	[Towards a sustainable, cost-effective mental health care; a policy perspective]	Tijdschr Psychiatr	x	PubMed	NA
3771	Knopf A.	2013	Treating mental illness and addiction in Salt Lake County	Behav Healthc	x	PubMed	NA
3772	Noguchi M, Moriya A, Fujita K.	2012	[Outreach services to clients with severe mental illness in the Okayama Prefectural Mental Health and Welfare Center]	Seishin Shinkeigaku Zasshi	x	PubMed	NA
3773		2013	Behavioral Health, United States, 2012	Behavioral Health, United States, 2012	x	PubMed	NA
3774	Spruiell GL, Hauser MJ, Commons ML, Drogin EY.	2011	Clinicians imagine a patient's view: Rating disclosures of confidential information	J Am Acad Psychiatry Law	x	PubMed	NA
3775	Yedlinsky NT, Neff LA, Jordan KM.	2019	Care of the Military Veteran: Selected Health Issues	Am Fam Physician	x	PubMed	NA
3776	Tian T, Chen Y, Zhu J, Liu P.	2015	Effect of Air Pollution and Rural-Urban Difference on Mental Health of the Elderly in China	Iran J Public Health	x	PubMed	NA
3777	Valenti?� D, Micovi?� V, Kolari?� B, Brnci?� N, Ljubotina A.	2010	The role of air quality in perception of health of the local population	Coll Antropol	x	PubMed	NA
3778	Kleisiaris CF, Sfakianakis C, Papathanasiou IV.	2014	Health care practices in ancient Greece: The Hippocratic ideal	J Med Ethics Hist Med	x	PubMed	NA
3779	Fordham A.	2013	Camp promotes mental health and fun	Aust Nurs Midwifery J	x	PubMed	NA
3780	Schilling S, Bustamante JA, Sala A, Acevedo C, Tapia E, Alvarado R, Sapag JC, Yang LH, Lukens E, Mascayano F, Cid P, Tapia T.	2015	Development of an intervention to reduce self-stigma in outpatient mental health service users in Chile	Rev Fac Cien Med Univ Nac Cordoba	x	PubMed	NA
3781	Backovi?� D.	2010	[Mental hygiene: ideas and practice in Serbia]	Srp Arh Celok Lek	x	PubMed	NA
3782	Wong GH, Hui CL, Wong DY, Tang JY, Chang WC, Chan SK, Lee EH, Xu JQ, Lin JJ, Lai DC, Tam W, Kok J, Chung DW, Hung SF, Chen EY.	2012	Developments in early intervention for psychosis in Hong Kong	East Asian Arch Psychiatry	x	PubMed	NA
3783	Stough LM, North CS.	2018	The association of adverse mental health effects with repeated exposure to disasters	Ann Clin Psychiatry	x	PubMed	NA
3784	Bhamani A, Sobani ZA, Baqir M, Bham NS, Beg MA, Fistein E.	2012	Mental health in the wake of flooding in pakistan: an ongoing humanitarian crisis	J Coll Physicians Surg Pak	x	PubMed	NA
3785	Strauss J, Peguero AM, Hirst G.	2013	Machine learning methods for clinical forms analysis in mental health	Stud Health Technol Inform	x	PubMed	NA
3786	Yanofski J.	2010	Prisoners v. Prisons: A History of Correctional Mental Health Rights	Psychiatry (Edgmont)	x	PubMed	NA
3787	Amorosi M.	2018	Ecosustainibility and Mental Health: female aspects	Psychiatr Danub	x	PubMed	NA
3788	Yacoub W, Douira-Khomsi W, Louati H, Lahmar L, Ben Hassine L, Nouira F, Jlidi S, Bellagha I.	2018	Self extrusion on an ingested foreign body: a case report	Tunis Med	x	PubMed	NA
3789	Gurney SM, Scott KS, Kacinko SL, Presley BC, Logan BK.	2014	Pharmacology, Toxicology, and Adverse Effects of Synthetic Cannabinoid Drugs	Forensic Sci Rev	x	PubMed	NA
3790	Tymoshchuk OV, Zhurakivska OY, Derpak VV, Kostitska IO, Tokar IT.	2020	Special aspects of the efficient daily routine of students at modern educational establishments of different types	Wiad Lek	x	PubMed	NA
3791	Pedata P, Grella R, Lamberti M, Bergamasco N.	2014	[Using the Mini-Mental State Examination (MMSE) for preliminary assessment of cognitive impairment in subjects exposed to air pollution with particulate matter]	G Ital Med Lav Ergon	x	PubMed	NA
3792	Kulkarni V, Chinnakali P, Kanchan T, Rao A, Shenoy M, Papanna MK.	2014	Psychiatric Co-morbidities among Patients with Select Non-communicable Diseases in a Coastal City of South India	Int J Prev Med	x	PubMed	NA
3793	Oken BS, Goodrich E, Klee D, Memmott T, Proulx J.	2018	Predictors of Improvements in Mental Health From Mindfulness Meditation in Stressed Older Adults	Altern Ther Health Med	x	PubMed	NA
3794	Sram RJ, Veleminsky M Jr, Veleminsky M Sr, Stejskalov?� J.	2017	The impact of air pollution to central nervous system in children and adults	Neuro Endocrinol Lett	x	PubMed	NA
3795	Murawiec S, Britmann J, Krysta K.	2013	Different facets of schizophrenia illustrated by the analysis of the homes of three patients diagnosed with schizophrenia	Psychiatr Danub	x	PubMed	NA
3796		2019	Community Water Fluoridation Exposure: A Review of Neurological and Cognitive Effects	Community Water Fluoridation Exposure: A Review of Neurological and Cognitive Effects	x	PubMed	NA
3797	Roysden N, Wright A.	2015	Predicting Health Care Utilization After Behavioral Health Referral Using Natural Language Processing and Machine Learning	AMIA Annu Symp Proc	x	PubMed	NA
3798	Antonelli JR, Seltzer R.	2016	Oral and Physical Manifestations of Anorexia and Bulimia Nervosa	Tex Dent J	x	PubMed	NA
3799	Papanikolaou V, Adamis D, Mellon RC, Prodromitis G.	2011	Psychological distress following wildfires disaster in a rural part of Greece: a case-control population-based study	Int J Emerg Ment Health	x	PubMed	NA
3800	Sitwat A, Asad S, Yousaf A.	2015	Psychopathology, Psychiatric Symptoms and their Demographic Correlates in Female Adolescents Flood Victims	J Coll Physicians Surg Pak	x	PubMed	NA
3801	Haswell MR, Bethmont A.	2016	Health concerns associated with unconventional gas mining in rural Australia	Rural Remote Health	x	PubMed	NA
3802	Tomita H.	2014	[Perspectives on researches in disaster psychiatry]	Seishin Shinkeigaku Zasshi	x	PubMed	NA
3803	Morris JG Jr, Grattan LM, Mayer BM, Blackburn JK.	2013	Psychological responses and resilience of people and communities impacted by the deepwater horizon oil spill	Trans Am Clin Climatol Assoc	x	PubMed	NA
3804	Greenhill JA, Walker J, Playford D.	2015	Outcomes of Australian rural clinical schools: a decade of success building the rural medical workforce through the education and training continuum	Rural Remote Health	x	PubMed	NA
3805	Nowosielski R, Mazurek T, Florkowski A.	2010	[Psychopathology service on ships]	Pol Merkur Lekarski	x	PubMed	NA
3806	Khorrami M, Mahdavi M, Fakhr F, Kheirollahi M.	2019	A Novel Pathogenic Variant in NAGLU?�(N-Acetyl-Alpha-Glucosaminidase)?�gene Identified by Targeted Next-Generation Sequencing Followed by in Silico Analysis	Iran J Child Neurol	x	PubMed	NA
3807	Beletskaya EN, Onul NM, Glavatskaya VI, Antonova EV, Golovkova TA.	2014	[Clinical and hygienic substantiation of individual biocorrection for ecologically dependent conditions in the critical groups of the population of Ukrainian industrial areas]	Gig Sanit	x	PubMed	NA
3808	Toonen RB, Wardenaar KJ, van Ockenburg SL, Bos EH, de Jonge P.	2016	Using State Space Methods to Reveal Dynamical Associations Between Cortisol and Depression	Nonlinear Dynamics Psychol Life Sci	x	PubMed	NA
3809	Chen CH, Chi MT, Huang HM, Sun FK.	2012	[Traumatic response experiences: one year after Typhoon Morakot]	Hu Li Za Zhi	x	PubMed	NA
3810	Rezaei-Yazdi A, Buckingham CD.	2014	Understanding data collection behaviour of mental health practitioners	Stud Health Technol Inform	x	PubMed	NA
3811	Brackbill RM, Caramanica K, Maliniak M, Stellman SD, Fairclough MA, Farfel MR, Turner L, Maslow CB, Moy AJ, Wu D, Yu S, Welch AE, Cone JE, Walker DJ.	2014	Nonfatal injuries 1 week after hurricane sandy--New York city metropolitan area, October 2012	MMWR Morb Mortal Wkly Rep	x	PubMed	NA
3812	Yaklin S, Jain R, Cole SP, Raison C, Rolin D, Jain S.	2020	HERO Wellness Scale: Examining a new mental wellness scale	Ann Clin Psychiatry	x	PubMed	NA
3813	Mahendran R, Hendricks M, Chan YH.	2010	Weight gain in Asian patients on second-generation antipsychotics	Ann Acad Med Singapore	x	PubMed	NA
3814	Nev?�rez-Sida A, Valencia-Huarte E, Escobedo-Islas O, Constantino-Casas P, Verduzco-Fragoso W, Le??n-Gonz?�lez G.	2013	[Cost-effectiveness of two hospital care schemes for psychiatric disorders]	Rev Med Inst Mex Seguro Soc	x	PubMed	NA
3815	Boraii S.	2017	A Descriptive Study to Assess Quality of Life in Egyptian Patients With a Stoma	Ostomy Wound Manage	x	PubMed	NA
3816	Tokmic F, Hadzikadic M, Cook JR, Tcheremissine OV.	2018	Development of a Behavioral Health Stigma Measure and Application of Machine Learning for Classification	Innov Clin Neurosci	x	PubMed	NA
3817	Rey GN, Aguilar PS, P?�rez FC, Orford J, Escudero GS, Sainz MT.	2016	[Cost-effectiveness of a brief intervention to support indigenous women in Hidalgo (Mexico) who live with alcohol abusers]	Rev Panam Salud Publica	x	PubMed	NA
3818	Shea SE, Goldman R.	2017	Ending Disparities and Achieving Justice for Individuals with Mental Disabilities	Albany Law Rev	x	PubMed	NA
3819	Zdanowicz N, Lepiece B, Tordeurs D, Jacques D, Janne P, Reynaert C.	2011	Families and health interactions	Psychiatr Danub	x	PubMed	NA
3820	Lee YC, Gao L, Dear BF, Titov N, Mihalopoulos C.	2017	The Cost-effectiveness of the Online MindSpot Clinic for the Treatment of Depression and Anxiety in Australia	J Ment Health Policy Econ	x	PubMed	NA
3821	Wagner G, Ghosh-Dastidar B, Ngo V, Robinson E, Musisi S, Glick P, Dickens A.	2016	A cluster randomized controlled trial of two task-shifting depression care models on depression alleviation and antidepressant response among HIV clients in Uganda	Res Adv Psychiatry	x	PubMed	NA
3822	Tanaka S.	2014	[Persistent depression with minute schizophrenia-like symptoms--from the viewpoint of "pluridimensional psychiatry"]	Seishin Shinkeigaku Zasshi	x	PubMed	NA
3823	Soares Santos A, de Souza Noronha KVM, Viegas Andrade M, Mariano Ruas C.	2020	PERSPECTIVES: Insurance markets, labor markets, and the mental health services delivery system	J Ment Health Policy Econ	x	PubMed	NA
3824	Thornton JD, Dwibedi N, Scott V, Ponte CD, Ziedonis D, Sambamoorthi N, Sambamoorthi U.	2018	Predictors of Transitioning to Incident Chronic Opioid Therapy Among Working-Age Adults in the United States	Am Health Drug Benefits	x	PubMed	NA
3825	Nika S, Ploumpidis D, Zervas J, Papadimitriou GN, Tzinieri-Kokkosi M.	2013	[Depression and anxiety in mothers of children who grow up in an area with industrial pollution]	Psychiatriki	x	PubMed	NA
3826	Koka K, Patel BC.	2020	Ptosis Correction	StatPearls	x	PubMed	NA
3827	Pershad Y, Guo M, Altman RB.	2020	Pathway and network embedding methods for prioritizing psychiatric drugs	Pac Symp Biocomput	x	PubMed	NA
3828	Mackinnon DF.	2012	A family tree filled with mental illness: review: a lethal inheritance: a mother uncovers the science behind three generations of mental illness by victoria costello	Cerebrum	x	PubMed	NA
3829	Ng SS, Lak DC, Lee SC, Ng PP.	2015	Concurrent validation of a neurocognitive assessment protocol for clients with mental illness in job matching as shop sales in supported employment	East Asian Arch Psychiatry	x	PubMed	NA
3830	Mahomed, Faraaz	2020	Addressing the Problem of Severe Underinvestment in Mental Health and Well-Being from a Human Rights Perspective	HEALTH AND HUMAN RIGHTS	x	WoS	NA
3831	Demler, Tammie Lee	2020	Assessing the Current Anti psychotics Landscape	US PHARMACIST	x	WoS	NA
3832	Kondo, Michelle C.; Mueller, Natalie; Locke, Dexter H.; Roman, Lara A.; Rojas-Rueda, David; Schinasi, Leah H.; Gascon, Mireia; Nieuwenhuijsen, Mark J.	2020	Health impact assessment of Philadelphia's 2025 tree canopy cover goals	LANCET PLANETARY HEALTH	x	WoS	NA
3833	Yadiyal, Aruna; Ruksheda, Syeda	2020	Indian Mental Health Landscape :Where do women stand?	INDIAN JOURNAL OF PSYCHIATRY	x	WoS	NA
3834	Van den Hazel, Peter	2019	Prevention of mental health effects by climate change and environmental drivers	EUROPEAN JOURNAL OF PUBLIC HEALTH	x	WoS	NA
3835	Yedlinsky, Nicole T.; Neff, Laurel A.; Jordan, Kevin M.	2019	Care of the Military Veteran: Selected Health Issues	AMERICAN FAMILY PHYSICIAN	x	WoS	NA
3836	Khorrami, Mehdi; Mahdavi, Manijeh; Fakhr, Fatemeh; Kheirollahi, Majid	2019	A Novel Pathogenic Variant in NAGLU (N-Acetyl-Alpha-Glucosaminidase) gene Identified by Targeted Next-Generation Sequencing Followed by in Silico Analysis	IRANIAN JOURNAL OF CHILD NEUROLOGY	x	WoS	NA
3837	Wiley, Elizabeth	2019	The unseen impacts of climate change on mental health	BRITISH COLUMBIA MEDICAL JOURNAL	x	WoS	NA
3838	Kulick, Erin; Wellenius, Gregory; Boehme, Amelia; Schupf, Nicole; Mayeux, Richard; Sacco, Ralph; Manly, Jennifer; Elkind, Mitchell	2019	Long-term Exposure to Ambient Air Pollution and Trajectories of Cognitive Decline among Older Adults in Northern Manhattan	NEUROLOGY	x	WoS	NA
3839	Chiauzzi, Emil; Torous, John; Nguyen, Theresa; Rethorst, Chad D.	2019	DIGITAL HEALTH IN THE WILD: HOW DO WE HELP PEOPLE WITH MENTAL HEALTH DISORDERS UTILIZE TECHNOLOGY IN THEIR TREATMENT?	ANNALS OF BEHAVIORAL MEDICINE	x	WoS	NA
3840	Reich, Devin; Todoki, Ariel; Dowsley, Rafael; De Cock, Martine; Nascimento, Anderson	2019	Privacy-Preserving Classification of Personal Text Messages with Secure Multi-Party Computation: An Application to Hate-Speech Detection	Advances in Neural Information Processing Systems	x	WoS	NA
3841	Harper, Ross; Southern, Joshua	2019	End-To-End Prediction of Emotion From Heartbeat Data Collected by a Consumer Fitness Tracker	International Conference on Affective Computing and Intelligent Interaction	x	WoS	NA
3842	Madhusri, V.; Kesavkrishna, G.; Marimuthu, Ramalatha; Sathyanarayanan, R.	2019	PERFORMANCE COMPARISON OF MACHINE LEARNING ALGORITHMS TO PREDICT LABOR COMPLICATIONS AND BIRTH DEFECTS BASED ON STRESS	International Conference on Awareness Science and Technology	x	WoS	NA
3843	Watthananon, Julaluk; Chintanaporn, Pollawat	2019	Utilizing Data Mining Techniques to Predicting IT Occupation of Persons with Disabilities in Thailand	2019 34TH INTERNATIONAL TECHNICAL CONFERENCE ON CIRCUITS/SYSTEMS, COMPUTERS AND COMMUNICATIONS (ITC-CSCC 2019)	x	WoS	NA
3844	Braga-Pinto, Cesar	2019	THE PLEASURES OF IMITATION: GABRIEL TARDE, OSCAR WILDE, AND JOAO DO RIO IN BRAZIL'S LONG FIN DE SIECLE	COMPARATIVE LITERATURE STUDIES	x	WoS	NA
3845	Almutairi, Mona; Alhamad, Nada; Alyami, Albandari; Alshubbar, Zainab; Alfayez, Heela; Al-Akkas, Noor; Alhiyafi, Jamal A.; Olatunji, Sunday O.	2019	Preemptive Diagnosis of Schizophrenia Disease Using Computational Intelligence Techniques	2019 2ND INTERNATIONAL CONFERENCE ON COMPUTER APPLICATIONS & INFORMATION SECURITY (ICCAIS)	x	WoS	NA
3846	Sebayang, Susy K.; Astutik, Erni; Dewi, Desak M. S. K.; Puspikawati, Septa I.	2019	Body Mass Index Is Associated with Mental Health Problems in Coastal Communities of Banyuwangi, Indonesia	ANNALS OF NUTRITION AND METABOLISM	x	WoS	NA
3847	Mills, Laura; Dionne, Alexandre; Bingley, Jennifer; Watson, Shelley L.	2019	Stumbling Along, Walking on Eggshells, and Vicious Circles: What Happens While Families Wait for Youth Substance Use Treatment	CANADIAN JOURNAL OF FAMILY AND YOUTH	x	WoS	NA
3848	Nicholas, Patrice K.; Breakey, Suellen	2019	The Economics of Climate Change and the Intersection with Conflict, Violence, and Migration: Implications for the Nursing Profession	NURSING ECONOMICS	x	WoS	NA
3849	Bhat, Bilal Ahmad	2019	Socio-demographic Profile and Psychiatric Morbidity of Flood Victims in a Mental Health Camp	INDIAN JOURNAL OF PSYCHIATRY	x	WoS	NA
3850	Punnoose, Varghese; Kumar, Sebind; Rajan, Varun	2019	Disasters And Mental Health - Lessons Learned The From Kerala Floods (Symposium)	INDIAN JOURNAL OF PSYCHIATRY	x	WoS	NA
3851	Choi, Jihye	2018	Perceptions of forest contact and its therapeutic role in university students in South Korea	AMAZONIA INVESTIGA	x	WoS	NA
3852	[Anonymous]	2018	Pollution linked to cognitive decline	NEW SCIENTIST	x	WoS	NA
3853	Idris, Idayu Badilla; Puteh, Sharifa Ezat Wan; Hod, Rozita; Nawi, Azmawati Mohammed; Ahmad, Izzah Syazwani; Siwar, Chamhuri; Taha, Mohd Raihan	2018	MENTAL HEALTH DISORDER AMONG POST FLOOD VICTIMS IN PAHANG	ASEAN JOURNAL OF PSYCHIATRY	x	WoS	NA
3854	Levai, Mihaela Codrina; Kanalas, Ghizela; Micu-Serbu, Iulia Bianca; Talpos, Cristina; Anghel, Mirella; Krems, Cristian Dan; Podariu, Alexandra Sabina	2018	Resilience and Risk Factors in Children Originated from Families in which Parents Migrate due to Labor Conditions	REVISTA DE CERCETARE SI INTERVENTIE SOCIALA	x	WoS	NA
3855	Reding, Michael E. J.; Guan, Karen; Regan, Jennifer; Palinkas, Lawrence A.; Lau, Anna S.; Chorpita, Bruce F.	2018	Implementation in a Changing Landscape: Provider Experiences During Rapid Scaling of Use of Evidence-Based Treatments	COGNITIVE AND BEHAVIORAL PRACTICE	x	WoS	NA
3856	Rabelo Taveira, D. Londe; Verlaine Borges e Azevedo, P.; Ferreira Caixeta, L.	2018	Prevalence of mental health problems among isolated indigenous youth from Amazonian forest	EUROPEAN PSYCHIATRY	x	WoS	NA
3857	Reddy, U. Srinivasulu; Thota, Aditya Vivek; Dharun, A.	2018	Machine Learning Techniques for Stress Prediction in Working Employees	IEEE International Conference on Computational Intelligence and Computing Research	x	WoS	NA
3858	Ner, Rohit; Das, Dibya Prakash; Kumar, Rishabh; Garg, Shubhika	2018	Fuzzy Based Wellness Analyzer	International Conference on Fuzzy Theory and Its Applications	x	WoS	NA
3859	Wang, Ying	2018	Analysis and Reference of the Public Hazards Prevention Agreement	Advances in Intelligent Systems Research	x	WoS	NA
3860	Amorosi, Marilisa	2018	ECOSUSTAINIBILITY AND MENTAL HEALTH: FEMALE ASPECTS	PSYCHIATRIA DANUBINA	x	WoS	NA
3861	Komorowska, Anna	2018	Forest School - a forest playground as a remedy for nature-deficit disorder in children	E-MENTOR	x	WoS	NA
3862	Donovan, Ryan; Healy, Michael; Zheng, Huiru; Engel, Felix; Binh Vu; Fuchs, Michael; Walsh, Paul; Hemmje, Matthias; Mc Kevitt, Paul	2018	SenseCare: Using Automatic Emotional Analysis to Provide Effective Tools for Supporting Wellbeing	IEEE International Conference on Bioinformatics and Biomedicine-BIBM	x	WoS	NA
3863	Kumail, Ali; Akhtar, Junaid; Raja, Muhammad Adil	2018	Neural Correlates of Belief	2018 INTERNATIONAL CONFERENCE ON COMPUTING, ELECTRONIC AND ELECTRICAL ENGINEERING (ICE CUBE)	x	WoS	NA
3864	Brennan, A.; Dempsey, M.	2018	THE STUDENT VOICE: THE STUDENTS OWN VIEWS ON SMARTPHONE USAGE AND IMPACT ON THEIR ACADEMIC PERFORMANCE	INTED Proceedings	x	WoS	NA
3865	Merlo, Emanuele Maria	2018	Index of scientific production during the 5 years of the MJCP	MEDITERRANEAN JOURNAL OF CLINICAL PSYCHOLOGY	x	WoS	NA
3866	Ruiz-Grao, M. C.; Hernandez-Martinez, A.; Garcia-Alcaraz, F.; Garcia-Moreno, M.; Amo-Saus, M. Ll.; Martinez-Esparcia, L.; Garcia-Lopez, A.; Molina-Alarcon, M.	2018	STUDY ABOUT NOISE LEVELS IN UNIVERSITY STUDENTS' LEISURE AREAS: A BARRIER AGAINST NOISE	INTED Proceedings	x	WoS	NA
3867	Byeon, Haewon	2017	Chi-Square Automatic Interaction Detection Modeling for Predicting Depression in Multicultural Female Students	INTERNATIONAL JOURNAL OF ADVANCED COMPUTER SCIENCE AND APPLICATIONS	x	WoS	NA
3868	Lee, Yu-Chen; Gao, Lan; Dear, Blake F.; Titov, Nickolai; Mihalopoulos, Cathrine	2017	The Cost-effectiveness of the Online MindSpot Clinic for the Treatment of Depression and Anxiety in Australia	JOURNAL OF MENTAL HEALTH POLICY AND ECONOMICS	x	WoS	NA
3869	Jevtic, M.	2017	Mental Health & the role of mindset in Climate Change issues	EUROPEAN JOURNAL OF PUBLIC HEALTH	x	WoS	NA
3870	Dzhambov, A.; Markevych, I.; Tilov, B.; Dimitrova, D.	2017	Residential greenspace modifies the effect of road traffic noise exposure on mental health in youth	EUROPEAN JOURNAL OF PUBLIC HEALTH	x	WoS	NA
3871	Van den Hazel, P.	2017	Perspective on Children's public mental health and climate change	EUROPEAN JOURNAL OF PUBLIC HEALTH	x	WoS	NA
3872	Chang, Chien Kai; Yang, Shu-Fei; Ho, Li-Chih; Chien, Hui-Lin	2017	Landscape Preference In Taiwanese School-Aged Children	I-PERCEPTION	x	WoS	NA
3873	Sharma, Malvika; Banerjee, Bratati; Garg, Suneela	2017	Assessment of Mental Health Literacy in School-going Adolescents	JOURNAL OF INDIAN ASSOCIATION FOR CHILD AND ADOLESCENT MENTAL HEALTH	x	WoS	NA
3874	Bhagwat, Samir; Bruxner, George	NA	Not quite out of the woods': potential for misdiagnosis of delayed neurologic syndrome of carbon monoxide poisoning as relapse of mental illness AUSTRALASIAN PSYCHIATRY 25 5 494 496 10.1177/1039856217726695 OCT 2017 2017 0 WOS:000412090100016		x	WoS	NA
3875	Boraii, Sherif	2017	A Descriptive Study to Assess Quality of Life in Egyptian Patients With a Stoma	OSTOMY WOUND MANAGEMENT	x	WoS	NA
3876	Liu, Hai-Ying; Dunea, Daniel; Oprea, Mihaela; Savu, Tom; Iordache, Stefania	2017	Improving the Protection of Children Against Air Pollution Threats in Romania - The RokidAIR Project Approach and Future Perspectives	REVISTA DE CHIMIE	x	WoS	NA
3877	Hackett, Christina L.; Jung, Young; Mulvale, Gillian; Mills, Laura; Dowie, Vaughn	2017	Evaluating the Effectiveness and Social Return on Investment of the Pine River Institute: An Intensive Mental Health and Addiction Program for Young People	JOURNAL OF MENTAL HEALTH POLICY AND ECONOMICS	x	WoS	NA
3878	McGeachan, Cheryl	NA	The Head Carver': Art Extraordinary and the small spaces of asylum HISTORY OF PSYCHIATRY 28 1 58 71 10.1177/0957154X16676693 MAR 2017 2017 2 WOS:000394959000005		x	WoS	NA
3879	McLaughlan, Rebecca J.	2017	In Defence of Theodore Gray: Architecture as a Vehicle for Re-evaluating a Doctor's Commitment to Patient Care	HEALTH AND HISTORY	x	WoS	NA
3880	Zeng, Jing; Li, Canwen	2017	The Application of Green Plants in the Interior Space	Advances in Social Science Education and Humanities Research	x	WoS	NA
3881	Higuchi, Masakazu; Shinohara, Shuji; Nakamura, Mitsuteru; Mitsuyoshi, Shunji; Tokuno, Shinichi; Omiya, Yasuhiro; Hagiwara, Naoki; Takano, Takeshi	2017	An Effect of Noise on Mental Health Indicator using Voice	International Conference on Intelligent Informatics and Biomedical Sciences ICIIBMS	x	WoS	NA
3882	Yin, Liying	2017	Research on the ecological consumption education in Colleges and universities from the perspective of College Students' Consumption Psychology	Advances in Social Science Education and Humanities Research	x	WoS	NA
3883	Wang, Jingying; Sui, Xiaoyun; Zhu, Tingshao; Flint, Jonathan	2017	Identifying Comorbidities from Depressed People via Voice Analysis	IEEE International Conference on Bioinformatics and Biomedicine-BIBM	x	WoS	NA
3884	Jindal, K.; Upadhyay, R.	2017	Epileptic Seizure Detection from EEG Signal using Flexible Analytical Wavelet Transform	2017 INTERNATIONAL CONFERENCE ON COMPUTER, COMMUNICATIONS AND ELECTRONICS (COMPTELIX)	x	WoS	NA
3885	Haghi, Mostafa; Thurow, Kerstin; Stoll, Norbert	2017	Four-Layer Wrist Worn Device for Sound level and Hazardous Gases Environmental Monitoring	2017 2ND INTERNATIONAL CONFERENCE ON SYSTEM RELIABILITY AND SAFETY (ICSRS)	x	WoS	NA
3886	Sram, Radim J.; Veleminsky, Milos; Veleminsky, Milos; Stejskalova, Jana	2017	The impact of air pollution to central nervous system in children and adults	NEUROENDOCRINOLOGY LETTERS	x	WoS	NA
3887	Nagaratnam, N.; Nagaratnam, S. A.	2017	Advanced carotid artery disease associated with recurring delirium followed by dementia	JOURNAL OF GERONTOLOGY AND GERIATRICS	x	WoS	NA
3888	Chen, Hao; Liu, Shubing; Lin, Yingchao	2017	Effect of Haze on Human Health and Prevention	AER-Advances in Engineering Research	x	WoS	NA
3889	Jones, Gavin	2017	To a God Unknown: Drought, Climate, and Race in the West	STEINBECK REVIEW	x	WoS	NA
3890	Granda Cantuna, Jorge; Solorzano, Santiago; Clairand, Jean-Michel	2017	Noise Pollution Measurement System Using Wireless Sensor Network and BAN Sensors	International Conference on eDemocracy and eGovernment ICEDEG	x	WoS	NA
3891	Eskelinen, A.; Saarikivi, C.	2017	THE STUDENTS' LEARNING EXPERIENCES IN A MULTIPROFESSIONAL LIVING LAB	EDULEARN Proceedings	x	WoS	NA
3892	Divandari, Javad; Emamian, Zahra Sadat	2016	THE ROLE OF STRUCTURAL ELEMENTS OF PERSIAN GARDEN IN MENTAL HEALTH	IIOAB JOURNAL	x	WoS	NA
3893	Haswell, M.; Bethmont, A.	2016	Health concerns associated with unconventional gas mining in rural Australia	RURAL AND REMOTE HEALTH	x	WoS	NA
3894	Mukari, Siti Zamratol-Mai Sarah; Maamor, Nashrah; Ishak, Wan Syafira; Hashim, Wan Fazlina Wan	2016	Hearing Loss and Risk Factors among Community Dwelling Older Adults in Selangor	SAINS MALAYSIANA	x	WoS	NA
3895	Chan, Eric J.; McNiel, Dale E.; Binder, Renee L.	2016	Sex Offenders in the Digital Age	JOURNAL OF THE AMERICAN ACADEMY OF PSYCHIATRY AND THE LAW	x	WoS	NA
3896	Cole, F.; Christie, M.	2016	Occupational engagement in a woodland: belonging and wellbeing for mental health	BRITISH JOURNAL OF OCCUPATIONAL THERAPY	x	WoS	NA
3897	Peterson, Barbara; Kaas, Merrie	2016	Developing a Roadmap for Interprofessional Education in Community-Based Mental Health Sites: Learning the Landscape, Signposts, Detours, and Reaching the Destination	JOURNAL OF THE AMERICAN PSYCHIATRIC NURSES ASSOCIATION	x	WoS	NA
3898	Lavelock, Caroline R.; Griffin, Brandon J.; Worthington, Everett L., Jr.; Benotsch, Eric G.; Lin, Yin; Greer, Chelsea L.; Garthe, Rachel C.; Coleman, Jennifer A.; Hughes, Chelsea M.; Davis, Don E.; Hook, Joshua N.	2016	A Qualitative Review and Integrative Model of Gratitude and Physical Health	JOURNAL OF PSYCHOLOGY AND THEOLOGY	x	WoS	NA
3899	Anjomshoa, Ali; Dolatshahi, Mahsa; Amirkhani, Fatemeh; Rahmani, Farzaneh; Mirbagheri, Mehdi M.; Aarabi, Mohammad Hadi	2016	Structural Brain Network Analysis in Schizophrenia Using Minimum Spanning Tree	IEEE Engineering in Medicine and Biology Society Conference Proceedings	x	WoS	NA
3900	Willox, Ashlee Cunsolo; Shiwak, Inez; Wood, Michele	2016	Climate change: the next challenge for circumpolar mental health?	INTERNATIONAL JOURNAL OF CIRCUMPOLAR HEALTH	x	WoS	NA
3901	Orudjev, Nazim Y.; Lempert, Mikhail B.; Osaulenko, Ivan; Salnikova, Natalia A.; Kuzmichev, Andrew A.; Kravets, Alla G.	2016	Computer - Based Visual Analysis of Ecology Influence on Human Mental Health	International Conference Information Intelligence Systems and Applications	x	WoS	NA
3902	Husain, Wahidah; Xin, Lee Ker; Rashid, Nur'Aini Abdul; Jothi, Neesha	2016	Predicting Generalized Anxiety Disorder Among Women Using Random Forest Approach	2016 3RD INTERNATIONAL CONFERENCE ON COMPUTER AND INFORMATION SCIENCES (ICCOINS)	x	WoS	NA
3903	Li, Xiaowei; Cao, Tong; Sun, Shuting; Hu, Bin; Ratcliffe, Martyn	2016	Classification Study on Eye Movement Data: Towards A New Approach in Depression Detection	IEEE Congress on Evolutionary Computation	x	WoS	NA
3904	Gideon, John; Provost, Emily Mower; Mclnnis, Melvin	2016	MOOD STATE PREDICTION FROM SPEECH OF VARYING ACOUSTIC QUALITY FOR INDIVIDUALS WITH BIPOLAR DISORDER	International Conference on Acoustics Speech and Signal Processing ICASSP	x	WoS	NA
3905	Mitra, Vikramjit; Tsiartas, Andreas; Shriberg, Elizabeth	2016	NOISE AND REVERBERATION EFFECTS ON DEPRESSION DETECTION FROM SPEECH	International Conference on Acoustics Speech and Signal Processing ICASSP	x	WoS	NA
3906	Li, Zhongqiu; Shi, Dianxi; Wang, Feng; Liu, Fan	2016	Loneliness Recognition Based on Mobile Phone Data	AER-Advances in Engineering Research	x	WoS	NA
3907	Rodrigues, R.; Silva, L.; Souza, E.; Souza, A.; Brito, F.	2016	Performance evaluation in teaching environments on climate change	OCCUPATIONAL SAFETY AND HYGIENE IV	x	WoS	NA
3908	Dutta, Sandipayan; Srivastava, Smriti; Panda, Soma; Thakur, Devesh; Pokhrel, Dhiraj; Venkatesh, Thuppil	2016	Estimation of Lead (Pb) in Toys Using X-Ray Fluorescence Technology	JOURNAL OF KRISHNA INSTITUTE OF MEDICAL SCIENCES UNIVERSITY	x	WoS	NA
3909	Sumathi, M. R.; Poorna, B.	2016	Prediction of Mental Health Problems Among Children Using Machine Learning Techniques	INTERNATIONAL JOURNAL OF ADVANCED COMPUTER SCIENCE AND APPLICATIONS	x	WoS	NA
3910	Toonen, Roelof B.; Wardenaar, Klaas J.; van Ockenburg, Sonja L.; Bos, Elisabeth H.; de Jonge, Peter	2016	Using State Space Methods to Reveal Dynamical Associations Between Cortisol and Depression	NONLINEAR DYNAMICS PSYCHOLOGY AND LIFE SCIENCES	x	WoS	NA
3911	Cianconi, P.; Tarricone, I.; Ventriglio, A.; De Rosa, C.; Fiorillo, A.; Saito, T.; Bhugra, D.	2015	Psychopathology in postmodern societies	JOURNAL OF PSYCHOPATHOLOGY	x	WoS	NA
3912	Kohen, Dafna E.; Bougie, Evelyne; Guevremont, Anne	2015	Housing and health among Inuit children	HEALTH REPORTS	x	WoS	NA
3913	Derevensky, Jeffrey L.; Gilbeau, Lynette	2015	Adolescent Gambling: Twenty-five Years of Research	CANADIAN JOURNAL OF ADDICTION	x	WoS	NA
3914	Tian, Tao; Chen, Yuhuai; Zhu, Jing; Liu, Pengling	2015	Effect of Air Pollution and Rural-Urban Difference on Mental Health of the Elderly in China	IRANIAN JOURNAL OF PUBLIC HEALTH	x	WoS	NA
3915	Cole, F.; Christie, M.	2015	Researching wellbeing in a woodland: participant and researcher occupational engagement	BRITISH JOURNAL OF OCCUPATIONAL THERAPY	x	WoS	NA
3916	D'Alessandro, Daniela; Buffoli, Maddalena; Capasso, Lorenzo; Fara, Gaetano Maria; Rebecchi, Andrea; Capolongo, Stefano	2015	Green areas and public health: improving wellbeing and physical activity in the urban context	EPIDEMIOLOGIA & PREVENZIONE	x	WoS	NA
3917	Greenhill, J. A.; Walker, J.; Playford, D.	2015	Outcomes of Australian rural clinical schools: a decade of success building the rural medical workforce through the education and training continuum	RURAL AND REMOTE HEALTH	x	WoS	NA
3918	Every-Palmer, S.; McBride, S.	2015	CLIMATE CHANGE AND MENTAL HEALTH	AUSTRALIAN AND NEW ZEALAND JOURNAL OF PSYCHIATRY	x	WoS	NA
3919	[Anonymous]	2015	GREEN EQUALS HEALTHY? TOWARDS AN EVIDENCE BASE FOR HIGH DENSITY HEALTHY CITY RESEARCH	LANDSCAPE ARCHITECTURE FRONTIERS	x	WoS	NA
3920	Vergyri, Dimitra; Knoth, Bruce; Shriberg, Elizabeth; Mitra, Vikramjit; McLaren, Mitchell; Ferrer, Luciana; Garcia, Pablo; Marmara, Charles	2015	Speech-Based Assessment of PTSD in a Military Population using Diverse Feature Classes	16TH ANNUAL CONFERENCE OF THE INTERNATIONAL SPEECH COMMUNICATION ASSOCIATION (INTERSPEECH 2015), VOLS 1-5	x	WoS	NA
3921	D'monte, Silviya; Panchal, Dakshata	2015	Data Mining Approach for Diagnose of Anxiety Disorder	2015 INTERNATIONAL CONFERENCE ON COMPUTING, COMMUNICATION & AUTOMATION (ICCCA)	x	WoS	NA
3922	Vossoughi, M.; Vierkotter, A.; Sugiri, D.; Probst-Hensch, N.; Stolz, S.; Luckhaus, C.; Huls, A.; Ranft, U.; Kramer, U.; Schikowski, T.	2015	The Roles Of Lung Function And Air Pollution On Cognitive Decline: Predictor And Mediator?	AMERICAN JOURNAL OF RESPIRATORY AND CRITICAL CARE MEDICINE	x	WoS	NA
3923	Liu, Yanghe; Sheng, Chenguang; Nnanna, George Agbai	2015	Detection of Selected Pharmaceutical Contaminants and Removal Efficiency of Emerging Contaminants by Application of Membrane Filtration Technology	PROCEEDINGS OF THE ASME INTERNATIONAL MECHANICAL ENGINEERING CONGRESS AND EXPOSITION, 2014, VOL 7	x	WoS	NA
3924	Peng, Li-yun; Fan, Lei; Wang, Jian-ye	2015	Research on the Psychological Effect of Low-frequency Noise on People and its Evaluation Methods	2015 4TH INTERNATIONAL CONFERENCE ON ENERGY AND ENVIRONMENTAL PROTECTION (ICEEP 2015)	x	WoS	NA
3925	Hu, Xuan	2015	Research on Urban Light Pollution and Its Prevention	AER-Advances in Engineering Research	x	WoS	NA
3926	Zhao Xin-feng; Li Chun; Yuan Zong-wei	2015	Study Research on the Improvement of Ecological Compensation Mechanism in the Process of Jing-jin-ji Ecological Environment Governance - Based on the Case of Jing-ji Tree Planting Project	PROCEEDINGS OF 2015 INTERNATIONAL CONFERENCE ON PUBLIC ADMINISTRATION (11TH) VOL I	x	WoS	NA
3927	Wang, Zhaoyu; Huang, Chunjia; Zheng, Guozhong	2015	The influence of fan system and air conditioner on indoor particles in university dormitories	ACSR-Advances in Comptuer Science Research	x	WoS	NA
3928	Badida, Miroslav; Borosova, Lenka; Liptai, Pavol; Moravec, Marek; Konkoly, Tomas	2015	MEASUREMENT OF THE SOUND ABSORPTION COEFFICIENT OF MATERIALS USING OF COMBINED SENSOR OF PARTICLE VELOCITY AND ACOUSTIC PRESSURE	International Multidisciplinary Scientific GeoConference-SGEM	x	WoS	NA
3929	Psarros, C.; Theleritis, C.; Economou, M.; Tzavara, Ch; Mantonakis, L.; Kioulos, K.; Roukas, D.; Bergiannaki, J. -D	2015	Insomnia is Related to the Early Development of PTSD in Victims of Wildfires	MULTIDIMENSIONAL CONSIDERATIONS	x	WoS	NA
3930	Pearce, Meryl; Eagle, Lynne; Low, David; Schurmann, Andrea	2015	CUT FROM 'COUNTRY': THE IMPACT OF CLIMATE CHANGE ON THE MENTAL HEALTH OF ABORIGINAL PASTORALISTS	AUSTRALASIAN JOURNAL OF REGIONAL STUDIES	x	WoS	NA
3931	Perticas, Diana Claudia; Simut, Ramona Marinela	2015	ECONOMETRIC TESTING OF THE RELATIONSHIP BETWEEN THE CO2 LEVEL AND LIFE EXPECTANCY IN ROMANIA	PROCEEDINGS OF 12TH INTERNATIONAL SCIENTIFIC CONFERENCE: ECONOMIC POLICY IN THE EUROPEAN UNION MEMBER COUNTRIES, PTS I AND II	x	WoS	NA
3932	Kalamkar, Gayatri S.; Sawai, R., V; Rampurkar, M., V	2015	Role of Ayurveda in Communicable Diseases	INTERNATIONAL JOURNAL OF AYURVEDIC MEDICINE	x	WoS	NA
3933	Liu, Wei; Shi, Benhui; Jiang, Lanping; Tangs, Xiaolin	2015	The Impact of Health Education or Health of the Victims of the Earthquake in Disaster Area	Advances in Social Science Education and Humanities Research	x	WoS	NA
3934	Khachatryan, E. A.; Van Hulle, M. M.; Manvelyan, H. M.	2015	COGNITIVE EVOKED POTENTIALS: A METHOD FOR INVESTIGATION OF LANGUAGE PROCESSING IN BRAIN	NEW ARMENIAN MEDICAL JOURNAL	x	WoS	NA
3935	Zafran, Hiba; Tallant, Beverlea	NA	It Would Be a Shame to Lose Them'': A Critical Historical, Scoping, and Expert Review on the Use of Projective Assessments in Occupational Therapy, Part I OCCUPATIONAL THERAPY IN MENTAL HEALTH 31 3 187 210 10.1080/0164212X.2015.1065538 2015 2015 6 WOS:000210641300001		x	WoS	NA
3936	Zafran, Hiba; Tallant, Beverlea	NA	It Would Be a Shame to Lose Them'': A Critical Historical, Scoping, and Expert Review on the Use of Projective Assessments in Occupational Therapy, Part II OCCUPATIONAL THERAPY IN MENTAL HEALTH 31 4 328 365 10.1080/0164212X.2015.1065539 2015 2015 6 WOS:000210642000002		x	WoS	NA
3937	Craig, J.	2014	WHAT IS THE CURRENT SITUATION? HOW DID WE GET HERE? WHAT DO WE THINK OF THE EVOLVING LANDSCAPE IN MENTAL HEALTH?	AUSTRALIAN AND NEW ZEALAND JOURNAL OF PSYCHIATRY	x	WoS	NA
3938	Milner, Erin; Fiorella, Kathryn; Hickey, Matthew; Salmen, Charles; Omollo, Dan; Mattah, Brian; Magerenge, Richard; Brashares, Justin; Fernald, Lia	2014	Household food insecurity associated with child cognitive development in a rural Kenyan community on Lake Victoria	FASEB JOURNAL	x	WoS	NA
3939	Fletcher, Richard Ribon; Oreskovic, Nicolas M.; Robinson, Alyssa I.	2014	Design and Clinical Feasibility of Personal Wearable Monitor for Measurement of Activity and Environmental Exposure	IEEE Engineering in Medicine and Biology Society Conference Proceedings	x	WoS	NA
3940	Ulloa, Alvaro; Liu, Jingyu; Vergara, Victor; Chen, Jiayu; Calhoun, Vince; Pattichis, Marios	2014	Three-way Parallel Independent Component Analysis for Imaging Genetics Using Multi-Objective Optimization	IEEE Engineering in Medicine and Biology Society Conference Proceedings	x	WoS	NA
3941	Lotfalian, M.; Emadian, S. F.; Far, N. Riahi; Salimi, M.; Sheikhmoonesi, F.	2014	OCCUPATIONAL STRESS IMPACT ON MENTAL HEALTH STATUS OF FOREST WORKERS	EUROPEAN PSYCHIATRY	x	WoS	NA
3942	Gafencu, M.; Tomita, M.; Dragu, M.; Bajireanu, D.; Moron, M.; Stan, V	2014	Resilience centered approach for children during floods	SECOND WORLD CONGRESS ON RESILIENCE: FROM PERSON TO SOCIETY	x	WoS	NA
3943	Kanalas, G.; Micu-Serbu, I. B.; Gulyas, V.; Ranta, M.; Nussbaum, L.; Nyiredi, A.; Jurma, A.; Rozinbaum, G. I.	2014	Resilience in children originated from families in which parents migrate due to labor conditions	SECOND WORLD CONGRESS ON RESILIENCE: FROM PERSON TO SOCIETY	x	WoS	NA
3944	Su, Yun; Hu, Bin; Xu, Lixin; Cai, Hanshu; Moore, Philip; Zhang, Xiaowei; Chen, Jing	2014	EmotionO plus : Physiological Signals Knowledge Representation and Emotion Reasoning Model for Mental Health Monitoring	IEEE International Conference on Bioinformatics and Biomedicine-BIBM	x	WoS	NA
3945	Freina, Laura; Busi, Michela; Canessa, Andrea; Caponetto, Ilaria; Ott, Michela	2014	LEARNING TO COPE WITH STREET DANGERS: AN INTERACTIVE ENVIRONMENT FOR THE INTELLECTUALLY IMPAIRED	EDULEARN Proceedings	x	WoS	NA
3946	Shah, Sharrda	2014	MULTI-GENERATIONAL OPPORTUNITY EROSION - EARLY NEGLECT, MENTAL HEALTH AND THE COMPROMISED FUTURE OF A GENERATION	ICERI Proceedings	x	WoS	NA
3947	Phillips, J.; Cruz, A.; Cuadra, S.; Martinez, D.; Perdomo, M.	2013	PREDICTORS OF MENTAL HEALTH AFTER A DISASTER: A STUDY OF OLDER ADULTS FOUR YEARS AFTER THE 2007 SAN DIEGO COUNTY WILDFIRES	GERONTOLOGIST	x	WoS	NA
3948	Yoda, T.; Yoshioka, A.; Sakano, N.; Miyatake, N.; Suzue, T.; Hirao, T.	2013	Mental health research for the 2011 flood affected people in Thailand	TROPICAL MEDICINE & INTERNATIONAL HEALTH	x	WoS	NA
3949	Voltas Moreso, Nuria; Hernandez-Martinez, Carmen; Arija Val, Victoria; Canals Sans, Josefa	2013	Socio-demographic and psychopathological risk factors in obsessive-compulsive disorder: Epidemiologic study of school population	INTERNATIONAL JOURNAL OF CLINICAL AND HEALTH PSYCHOLOGY	x	WoS	NA
3950	Rana, C. S.; Tiwari, J. K.; Dangwal, L. R.; Gairola, S.	2013	Faith herbal healer knowledge document of Nanda Devi Biosphere Reserve, Uttarakhand, India	INDIAN JOURNAL OF TRADITIONAL KNOWLEDGE	x	WoS	NA
3951	Raffensperger, Kathryn	2013	ATKINS V. VIRGINIA: THE NEED FOR CONSISTENT SUBSTANTIVE AND PROCEDURAL APPLICATION OF THE BAN ON EXECUTING THE INTELLECTUALLY DISABLED	DENVER UNIVERSITY LAW REVIEW	x	WoS	NA
3952	Ma Shuiping; Li Qiang	2013	A Study on Humanized Design of City Square by Environmental Psychology	PROCEEDINGS OF THE 9TH EURO-ASIA CONFERENCE ON ENVIRONMENT AND CSR: TOURISM, SOCIETY AND EDUCATION SESSION (PT III)	x	WoS	NA
3953	Wan, Chao; Liu, Wei	2013	The Comparative Study of Tree Drawing Test on Chinese College Students and African Students	Advances in Education Research	x	WoS	NA
3954	Pearson, D.	2013	Health Benefits from Urban Agriculture Using Organic Methods	Acta Horticulturae	x	WoS	NA
3955	Li Ruijing; Zhong Bo; Chen Xiaomei; He Longbiao; Xu Huan	2013	Design and Realization of Inspection System for Bone-Conduction Hearing Aid	2013 ICME INTERNATIONAL CONFERENCE ON COMPLEX MEDICAL ENGINEERING (CME)	x	WoS	NA
3956	Christian, A.; Aikins, A. de-Graft; Lartey, A.	2013	CLIMATE VARIABILITY ON CAREGIVER'S MENTAL HEALTH AND CHILD NUTRITIONAL STATUS	ANNALS OF NUTRITION AND METABOLISM	x	WoS	NA
3957	Karakolios, Efthymios A.; Vosniakos, Fokion K.; Mamoukaris, Alexandros; Xipolitos, Konstantinos; Constantin, Daniel E.	2013	VEHICLE EMISSIONS IN THE CITY OF LEPTOKARIA (GREECE) AND ITS CONTRIBUTION TO THE ATMOSPHERIC AIR AND NOISE POLLUTION	FRESENIUS ENVIRONMENTAL BULLETIN	x	WoS	NA
3958	Li Ruiling; Wei Liang; Li Lianyu	2013	The Research to Strengthen College Students' Psychological Health Education	Advances in Education Research	x	WoS	NA
3959	Buckingham, Christopher D.; Ahmed, Abu; Adams, Ann	2013	Designing multiple user perspectives and functionality for clinical decision support systems	Federated Conference on Computer Science and Information Systems	x	WoS	NA
3960	Li, Yang; Hu, Bin; Zhao, Qinglin; Peng, Hong; Shi, Yujun; Li, Yunpeng; Moore, Philip	2013	The Removal of ocular artifacts from EEG Signals: an Adaptive Modeling technique for Portable Applications	IEEE International Conference on Bioinformatics and Biomedicine-BIBM	x	WoS	NA
3961	Gordon, Judy O'Buck	2013	THE URBAN PATCH: STUDENT RESEARCH, APPLIED INNOVATIVE FARM TECHNOLOGY AND SPATIAL DESIGN	INTED Proceedings	x	WoS	NA
3962	Murawiec, Slawomir; Britmann, Jonathan; Krysta, Krzysztof	2013	DIFFERENT FACETS OF SCHIZOPHRENIA ILLUSTRATED BY THE ANALYSIS OF THE HOMES OF THREE PATIENTS DIAGNOSED WITH SCHIZOPHRENIA	PSYCHIATRIA DANUBINA	x	WoS	NA
3963	Sebastian, Catherine	2012	Don't leave me out!	PSYCHOLOGIST	x	WoS	NA
3964	Gunn, K. M.; Kettler, L. J.; Skaczkowski, G. L. A.; Turnbull, D. A.	2012	Farmers' stress and coping in a time of drought	RURAL AND REMOTE HEALTH	x	WoS	NA
3965	Weuve, Jennifer; Yanosky, Jeff D.	2012	Polycyclic Aromatic Hydrocarbons, Particulate Air Pollution, and Cognitive Decline reply	ARCHIVES OF INTERNAL MEDICINE	x	WoS	NA
3966	Grant, William B.	2012	Polycyclic Aromatic Hydrocarbons, Particulate Air Pollution, and Cognitive Decline	ARCHIVES OF INTERNAL MEDICINE	x	WoS	NA
3967	Garg, Vikas; Garg, Hitta; Pai, Nagesh; Malesu, Rammohan	2012	GLOBAL WARMING AND MENTAL HEALTH	AUSTRALIAN AND NEW ZEALAND JOURNAL OF PSYCHIATRY	x	WoS	NA
3968	Fistein, Elizabeth; Bhamani, Amyn; Sobani, Zain A.; Baqir, Maryam; Bham, Nida Shahab; Beg, M. Asim	2012	Mental Health in the Wake of Flooding in Pakistan: An Ongoing Humanitarian Crisis (vol 22, pg 66, 2012)	JCPSP-JOURNAL OF THE COLLEGE OF PHYSICIANS AND SURGEONS PAKISTAN	x	WoS	NA
3969	Blank, Karen; Hash, Michael; Feder, Judith	2012	FEDERAL HEALTH POLICY: MENTAL HEALTH PRIORITIES IN A CHALLENGING CONGRESSIONAL LANDSCAPE	AMERICAN JOURNAL OF GERIATRIC PSYCHIATRY	x	WoS	NA
3970	Sivalingam, Ravishankar; Cherian, Anoop; Fasching, Joshua; Walczak, Nicholas; Bird, Nathaniel; Morellas, Vassilios; Murphy, Barbara; Cullen, Kathryn; Lim, Kelvin; Sapiro, Guillermo; Papanikolopoulos, Nikolaos	2012	A Multi-Sensor Visual Tracking System for Behavior Monitoring of At-Risk Children	IEEE International Conference on Robotics and Automation ICRA	x	WoS	NA
3971	Fistein, Elizabeth; Bhamani, Amyn; Sobani, Zain A.; Baqir, Maryam; Bham, Nida Shahab; Beg, M. Asim	2012	Mental Health in the Wake of Flooding in Pakistan: An Ongoing Humanitarian Crisis	JCPSP-JOURNAL OF THE COLLEGE OF PHYSICIANS AND SURGEONS PAKISTAN	x	WoS	NA
3972	Lapaige, Veronique	2012	GLOBALIZATION AND KNOWLEDGE TRANSLATION SCIENCE IN MENTAL ECOHEALTH: NEW ACTORS, RENEWED PERSPECTIVES	EDULEARN Proceedings	x	WoS	NA
3973	Maghrabi, Katibah	2012	Impact of Flood Disaster on the Mental Health of Residents in the Eastern Region of Jeddah Governorate, 2010: A Study in Medical geography	LIFE SCIENCE JOURNAL-ACTA ZHENGZHOU UNIVERSITY OVERSEAS EDITION	x	WoS	NA
3974	Norra, C.; Ngoc, D. T. M.; Trang, P. T. K.; Lan, V. T. M.; Viet, P. H.; Norra, S.; Kunert, H. J.	2012	Mental health burden and neuropsychiatric deficits of chronic arsenic exposure: First results of the Vietnamese field study	Arsenic in the Environment	x	WoS	NA
3975	Patrick, Rebecca; Capetola, Teresa	2011	It's here! Are we ready? Five case studies of health promotion practices that address climate change from within Victorian health care settings	HEALTH PROMOTION JOURNAL OF AUSTRALIA	x	WoS	NA
3976	Howat, Peter; Stoneham, Melissa	2011	Why sustainable population growth is a key to climate change and public health equity	HEALTH PROMOTION JOURNAL OF AUSTRALIA	x	WoS	NA
3977	Hungerford, C.	2011	Changing landscapes: A partnership between mental health nurses and the Psychotherapy and Counselling Federation of Australia Inc. (PACFA)	INTERNATIONAL JOURNAL OF MENTAL HEALTH NURSING	x	WoS	NA
3978	Zdanowicz, Nicolas; Lepiece, Brice; Tordeurs, David; Jacques, Denis; Janne, Pascal; Reynaert, Christine	2011	FAMILIES AND HEALTH INTERACTIONS	PSYCHIATRIA DANUBINA	x	WoS	NA
3979	Bugaj, Katarzyna; Brenner, Brenda	2011	The Effects of Music Instruction on Cognitive Development and Reading Skills-An Overview	BULLETIN OF THE COUNCIL FOR RESEARCH IN MUSIC EDUCATION	x	WoS	NA
3980	Valcour, J.; Martin, D.; Bull, J.; Paul, M.; Graham, J.; Wall, D.	2011	A LOSS OF COLOUR: MENTAL HEALTH IN SOUTH LABRADOR COASTAL COMMUNITIES	AMERICAN JOURNAL OF EPIDEMIOLOGY	x	WoS	NA
3981	Bradbery, Patrick	2011	Plumbing the Depths: Research as a Developmental Tool	PROCEEDINGS OF THE 10TH EUROPEAN CONFERENCE ON RESEARCH METHODOLOGY FOR BUSINESS AND MANAGEMENT STUDIES	x	WoS	NA
3982	Raphaely, T. D.; Marinova, D.	2011	Preventing further climate change: A call to individual action through a decrease in meat consumption	19TH INTERNATIONAL CONGRESS ON MODELLING AND SIMULATION (MODSIM2011)	x	WoS	NA
3983	Lapaige, Veronique	2011	THE EMERGENCE OF WEATHER-RELATED DISASTER PUBLIC HEALTH AND MENTAL HEALTH DISCIPLINE: WEB 2.0 AND WEB 3.0 CONTINUING MEDICAL EDUCATION IS REQUIRED	2011 4TH INTERNATIONAL CONFERENCE OF EDUCATION, RESEARCH AND INNOVATION (ICERI)	x	WoS	NA
3984	Sun, Fuhua; Shen, Juqin; Ji, Jian; Qin, Qi; Wu, Jun	2011	Scope definition of social impact of the Blue-green algae event in Taihu Lake and necessity and feasibility of research	2011 INTERNATIONAL CONFERENCE ON ELECTRONICS, COMMUNICATIONS AND CONTROL (ICECC)	x	WoS	NA
3985	Lapaige, Veronique	2011	EECOHEALTH: ADAPTIVE TRANSFRONTIER ECOLEARNING FOR CLIMATE CHANGE-ORIENTED EHEALTH AND CLIMATE-SENSITIVE PSYCHOPATHOLOGY	EDULEARN Proceedings	x	WoS	NA
3986	Adamis, D.; Papanikolaou, V.; Mellon, R. C.; Prodromitis, G.	2011	THE IMPACT OF WILDFIRES ON MENTAL HEALTH OF RESIDENTS IN A RURAL AREA OF GREECE. A CASE CONTROL POPULATION BASED STUDY	EUROPEAN PSYCHIATRY	x	WoS	NA
3987	Hossain, D.; Gorman, D.; Eley, R.; Coutts, J.	2010	Value of Mental Health First Aid training of Advisory and Extension Agents in supporting farmers in rural Queensland	RURAL AND REMOTE HEALTH	x	WoS	NA
3988	Mahendran, Rathi; Hendricks, M.; Chan, Yiong Huak	2010	Weight Gain in Asian Patients on Second-generation Antipsychotics	ANNALS ACADEMY OF MEDICINE SINGAPORE	x	WoS	NA
3989	Oliver, Javier; Garcia, Begona	2010	LEARNING MODELS AND TEACHING PERSPECTIVES	3RD INTERNATIONAL CONFERENCE OF EDUCATION, RESEARCH AND INNOVATION (ICERI2010)	x	WoS	NA
3990	Hayashi, Mayumi	2010	Citizen Education Programs at Awaji Landscape Planning & Horticulture Academy for the Improvement of the Landscape and the Environment	47TH INTERNATIONAL FEDERATION OF LANDSCAPE ARCHITECTS (IFLA) WORLD CONGRESS	x	WoS	NA
3991	Yang, Huiqin; Luo, Hongge	2010	Correlation Study between Indoor Air Pollution and Mental Health Status of Inhabitant	CONFERENCE ON ENVIRONMENTAL POLLUTION AND PUBLIC HEALTH, VOL 1-2	x	WoS	NA
3992	Li Wenchang; Yin Shang-xian	2010	Theory and Technology System of Green Coal Mining for Mine Areas with High Confined Pressure Groundwater	INTERNATIONAL MINING FORUM 2010: MINE SAFETY AND EFFICIENT EXPLOITATION FACING CHALLENGE OF THE 21ST CENTURY	x	WoS	NA
3993	Kamii, Constance; Russell, Kelly A.	2010	The Older of Two Trees: Young Children's Development of Operational Time	JOURNAL FOR RESEARCH IN MATHEMATICS EDUCATION	x	WoS	NA
3994	Davidson, Graham R.; Carr, Stuart C.	2010	Forced Migration, Social Exclusion and Poverty: Introduction	JOURNAL OF PACIFIC RIM PSYCHOLOGY	x	WoS	NA
3995	Hesselink, Ann-Mari Elizabeth; Herbig, Friedo Johann Willem	2010	Offender Rehabilitation and Counselling Dynamics in the South African Correctional Environment: Systems and Prospects	JOURNAL OF PSYCHOLOGY IN AFRICA	x	WoS	NA
3996	Rosen, Craig S.; Cohen, Michael	2010	Subgroups of New York City Children at High Risk of PTSD After the September 11 Attacks: A Signal Detection Analysis	PSYCHIATRIC SERVICES	x	WoS	NA
3997	Hong, Jiang; Jian, Kang; Hong, Jin	2010	Noise Control in Public Areas of Subway Stations	GRF Asia Publication Series	x	WoS	NA
1	Scott J, Varghese D, McGrath J.	2010	As the twig is bent, the tree inclines: adult mental health consequences of childhood adversity	Arch Gen Psychiatry	10.1001/archgenpsychiatry.2009.188	PubMed	FALSE
2	Scott, James; Varghese, Daniel; McGrath, John	2010	As the Twig Is Bent, the Tree Inclines Adult Mental Health Consequences of Childhood Adversity	ARCHIVES OF GENERAL PSYCHIATRY	10.1001/archgenpsychiatry.2009.188	WoS	TRUE
3	Weuve J, Puett RC, Schwartz J, Yanosky JD, Laden F, Grodstein F.	2012	Exposure to particulate air pollution and cognitive decline in older women	Arch Intern Med	10.1001/archinternmed.2011.683	PubMed	FALSE
4	Bhatia R.	2012	Policy and regulatory action can reduce harms from particulate pollution: comment on "exposure to particulate air pollution and cognitive decline in older women"	Arch Intern Med	10.1001/archinternmed.2011.799	PubMed	FALSE
5	Grant WB.	2012	Polycyclic aromatic hydrocarbons, particulate air pollution, and cognitive decline	Arch Intern Med	10.1001/archinternmed.2012.1698	PubMed	FALSE
6	Weuve J, Yanosky JD.	2012	Polycyclic aromatic hydrocarbons, particulate air pollution, and cognitive decline-reply	Arch Intern Med	10.1001/archinternmed.2012.2159	PubMed	FALSE
7	McClellan J, King MC.	2010	Genomic analysis of mental illness: a changing landscape	JAMA	10.1001/jama.2010.869	PubMed	FALSE
8	McClellan, Jon; King, Mary-Claire	2010	Genomic Analysis of Mental Illness A Changing Landscape	JAMA-JOURNAL OF THE AMERICAN MEDICAL ASSOCIATION	10.1001/jama.2010.869	WoS	TRUE
9	McClellan, Jon	2010	Genomic Analysis of Mental Illness: A Changing Landscape (vol 303, pg 2523, 2010)	JAMA-JOURNAL OF THE AMERICAN MEDICAL ASSOCIATION	10.1001/jama.2010.943	WoS	FALSE
10	Patz JA, Frumkin H, Holloway T, Vimont DJ, Haines A.	2014	Climate change: challenges and opportunities for global health	JAMA	10.1001/jama.2014.13186	PubMed	FALSE
11	Patz, Jonathan A.; Frumkin, Howard; Holloway, Tracey; Vimont, Daniel J.; Haines, Andrew	2014	Climate Change Challenges and Opportunities for Global Health	JAMA-JOURNAL OF THE AMERICAN MEDICAL ASSOCIATION	10.1001/jama.2014.13186	WoS	TRUE
12	Morris PE, Berry MJ, Files DC, Thompson JC, Hauser J, Flores L, Dhar S, Chmelo E, Lovato J, Case LD, Bakhru RN, Sarwal A, Parry SM, Campbell P, Mote A, Winkelman C, Hite RD, Nicklas B, Chatterjee A, Young MP.	2016	Standardized Rehabilitation and Hospital Length of Stay Among Patients With Acute Respiratory Failure: A Randomized Clinical Trial	JAMA	10.1001/jama.2016.7201	PubMed	FALSE
13	Morris, Peter E.; Berry, Michael J.; Files, D. Clark; Thompson, J. Clifton; Hauser, Jordan; Flores, Lori; Dhar, Sanjay; Chmelo, Elizabeth; Lovato, James; Case, L. Douglas; Bakhru, Rita N.; Sarwal, Aarti; Parry, Selina M.; Campbell, Pamela; Mote, Arthur; Winkelman, Chris; Hite, Robert D.; Nicklas, Barbara; Chatterjee, Arjun; Young, Michael P.	2016	Standardized Rehabilitation and Hospital Length of Stay Among Patients With Acute Respiratory Failure A Randomized Clinical Trial	JAMA-JOURNAL OF THE AMERICAN MEDICAL ASSOCIATION	10.1001/jama.2016.7201	WoS	TRUE
14	South EC, Hohl BC, Kondo MC, MacDonald JM, Branas CC.	2018	Effect of Greening Vacant Land on Mental Health of Community-Dwelling Adults: A Cluster Randomized Trial	JAMA Netw Open	10.1001/jamanetworkopen.2018.0298	PubMed	FALSE
15	South, Eugenia C.; Hohl, Bernadette C.; Kondo, Michelle C.; MacDonald, John M.; Branas, Charles C.	2018	Effect of Greening Vacant Land on Mental Health of Community-Dwelling Adults A Cluster Randomized Trial	JAMA NETWORK OPEN	10.1001/jamanetworkopen.2018.0298	WoS	TRUE
16	Astell-Burt T, Feng X.	2019	Association of Urban Green Space With Mental Health and General Health Among Adults in Australia	JAMA Netw Open	10.1001/jamanetworkopen.2019.8209	PubMed	FALSE
17	Kaup AR, Nettiksimmons J, Harris TB, Sink KM, Satterfield S, Metti AL, Ayonayon HN, Yaffe K; Health, Aging, and Body Composition (Health ABC) Study.	2015	Cognitive resilience to apolipoprotein E ?�4: contributing factors in black and white older adults	JAMA Neurol	10.1001/jamaneurol.2014.3978	PubMed	FALSE
18	Mosnier I, Bebear JP, Marx M, Fraysse B, Truy E, Lina-Granade G, Mondain M, Sterkers-Arti?�res F, Bordure P, Robier A, Godey B, Meyer B, Frachet B, Poncet-Wallet C, Bouccara D, Sterkers O.	2015	Improvement of cognitive function after cochlear implantation in elderly patients	JAMA Otolaryngol Head Neck Surg	10.1001/jamaoto.2015.129	PubMed	FALSE
19	Thomson H, Thomas S, Sellstrom E, Petticrew M.	2013	Housing improvements for health and associated socio-economic outcomes	Cochrane Database Syst Rev	10.1002/14651858.CD008657.pub2	PubMed	FALSE
20	Khokhar WA, Clifton A, Jones H, Tosh G.	2011	Oral health advice for people with serious mental illness	Cochrane Database Syst Rev	10.1002/14651858.CD008802.pub2	PubMed	FALSE
21	Khokhar, Waqqas Ahmad; Clifton, Andrew; Jones, Hannah; Tosh, Graeme	2011	Oral health advice for people with serious mental illness	COCHRANE DATABASE OF SYSTEMATIC REVIEWS	10.1002/14651858.CD008802.pub2	WoS	TRUE
22	Khokhar MA, Khokhar WA, Clifton AV, Tosh GE.	2016	Oral health education (advice and training) for people with serious mental illness	Cochrane Database Syst Rev	10.1002/14651858.CD008802.pub3	PubMed	FALSE
23	Husk K, Lovell R, Cooper C, Stahl-Timmins W, Garside R.	2016	Participation in environmental enhancement and conservation activities for health and well-being in adults: a review of quantitative and qualitative evidence	Cochrane Database Syst Rev	10.1002/14651858.CD010351.pub2	PubMed	FALSE
24	Foudi, Sebastien; Oses-Eraso, Nuria; Galarraga, Ibon	2017	The effect of flooding on mental health: Lessons learned for building resilience	WATER RESOURCES RESEARCH	10.1002/2017WR020435	WoS	FALSE
25	Adams EA, Stoler J, Adams Y.	2020	Water insecurity and urban poverty in the Global South: Implications for health and human biology	Am J Hum Biol	10.1002/ajhb.23368	PubMed	FALSE
26	Adams, Ellis A.; Stoler, Justin; Adams, Yenupini	2020	Water insecurity and urban poverty in the Global South: Implications for health and human biology	AMERICAN JOURNAL OF HUMAN BIOLOGY	10.1002/ajhb.23368	WoS	TRUE
27	Rosati AG.	2019	Heterochrony in chimpanzee and bonobo spatial memory development	Am J Phys Anthropol	10.1002/ajpa.23833	PubMed	FALSE
28	Rosati, Alexandra G.	2019	Heterochrony in chimpanzee and bonobo spatial memory development	AMERICAN JOURNAL OF PHYSICAL ANTHROPOLOGY	10.1002/ajpa.23833	WoS	TRUE
29	Orhan G, Bock M, Schepers D, Ilina EI, Reichel SN, L?�ffler H, Jezutkovic N, Weckhuysen S, Mandelstam S, Suls A, Danker T, Guenther E, Scheffer IE, De Jonghe P, Lerche H, Maljevic S.	2014	Dominant-negative effects of KCNQ2 mutations are associated with epileptic encephalopathy	Ann Neurol	10.1002/ana.24080	PubMed	FALSE
30	Orhan, Goekce; Bock, Merle; Schepers, Dorien; Ilina, Elena I.; Reichel, Stephanie Nadine; Loeffler, Heidi; Jezutkovic, Nicole; Weckhuysen, Sarah; Mandelstam, Simone; Suls, Arvid; Danker, Timm; Guenther, Elke; Scheffer, Ingrid E.; De Jonghe, Peter; Lerche, Holger; Maljevic, Snezana	2014	Dominant-negative effects of KCNQ2 mutations are associated with epileptic encephalopathy	ANNALS OF NEUROLOGY	10.1002/ana.24080	WoS	TRUE
31	Oliver KL, Franceschetti S, Milligan CJ, Muona M, Mandelstam SA, Canafoglia L, Boguszewska-Chachulska AM, Korczyn AD, Bisulli F, Di Bonaventura C, Ragona F, Michelucci R, Ben-Zeev B, Straussberg R, Panzica F, Massano J, Friedman D, Crespel A, Engelsen BA, Andermann F, Andermann E, Spodar K, Lasek-Bal A, Riguzzi P, Pasini E, Tinuper P, Licchetta L, Gardella E, Lindenau M, Wulf A, M?�ller RS, Benni…	2017	Myoclonus epilepsy and ataxia due to KCNC1 mutation: Analysis of 20 cases and K(+) channel properties	Ann Neurol	10.1002/ana.24929	PubMed	FALSE
32	Oliver, Karen L.; Franceschetti, Silvana; Milligan, Carol J.; Muona, Mikko; Mandelstam, Simone A.; Canafoglia, Laura; Boguszewska-Chachulska, Anna M.; Korczyn, Amos D.; Bisulli, Francesca; Di Bonaventura, Carlo; Ragona, Francesca; Michelucci, Roberto; Ben-Zeev, Bruria; Straussberg, Rachel; Panzica, Ferruccio; Massano, Joao; Friedman, Daniel; Crespel, Arielle; Engelsen, Bernt A.; Andermann, Freder…	2017	Myoclonus Epilepsy and Ataxia due to KCNC1 Mutation: Analysis of 20 Cases and K plus Channel Properties	ANNALS OF NEUROLOGY	10.1002/ana.24929	WoS	TRUE
33	Alvarez-Fernandez S, Brown HR, Zhao Y, Raithel JA, Bishop SL, Kern SB, Lord C, Petkova E, Di Martino A.	2017	Perceived social support in adults with autism spectrum disorder and attention-deficit/hyperactivity disorder	Autism Res	10.1002/aur.1735	PubMed	FALSE
34	Schmitgen MM, Niedtfeld I, Schmitt R, Mancke F, Winter D, Schmahl C, Herpertz SC.	2019	Individualized treatment response prediction of dialectical behavior therapy for borderline personality disorder using multimodal magnetic resonance imaging	Brain Behav	10.1002/brb3.1384	PubMed	FALSE
35	Fan T, Hu Y, Xin J, Zhao M, Wang J.	2020	Analyzing the genes and pathways related to major depressive disorder via a systems biology approach	Brain Behav	10.1002/brb3.1502	PubMed	FALSE
36	Fan, Ting; Hu, Ying; Xin, Juncai; Zhao, Mengwen; Wang, Ju	2020	Analyzing the genes and pathways related to major depressive disorder via a systems biology approach	BRAIN AND BEHAVIOR	10.1002/brb3.1502	WoS	TRUE
37	Holoyda BJ.	2018	Animal maltreatment law: Evolving efforts to protect animals and their forensic mental health implications	Behav Sci Law	10.1002/bsl.2367	PubMed	FALSE
38	Holoyda, Brian James	2018	Animal maltreatment law: Evolving efforts to protect animals and their forensic mental health implications	BEHAVIORAL SCIENCES & THE LAW	10.1002/bsl.2367	WoS	TRUE
39	Martin MS, Wamboldt AD, O'Connor SL, Fortier J, Simpson AI.	2013	A comparison of scoring models for computerised mental health screening for federal prison inmates	Crim Behav Ment Health	10.1002/cbm.1853	PubMed	FALSE
40	Duan, Lijuan; Lian, Zhaoyang; Chen, Juncheng; Qiao, Yuanhua; Miao, Jun; Li, Mingai	2020	Classification of epilepsy period based on combination feature extraction methods and spiking swarm intelligent optimization algorithm	CONCURRENCY AND COMPUTATION-PRACTICE & EXPERIENCE	10.1002/cpe.5550	WoS	FALSE
41	Turna J, Patterson B, Van Ameringen M.	2017	Is cannabis treatment for anxiety, mood, and related disorders ready for prime time?	Depress Anxiety	10.1002/da.22664	PubMed	FALSE
42	Turna, Jasmine; Patterson, Beth; Van Ameringen, Michael	2017	Is cannabis treatment for anxiety, mood, and related disorders ready for prime time?	DEPRESSION AND ANXIETY	10.1002/da.22664	WoS	TRUE
43	Miguel EM, Chou T, Golik A, Cornacchio D, Sanchez AL, DeSerisy M, Comer JS.	2017	Examining the scope and patterns of deliberate self-injurious cutting content in popular social media	Depress Anxiety	10.1002/da.22668	PubMed	FALSE
44	Miguel, Elizabeth M.; Chou, Tommy; Golik, Alejandra; Cornacchio, Danielle; Sanchez, Amanda L.; DeSerisy, Mariah; Comer, Jonathan S.	2017	Examining the scope and patterns of deliberate self-injurious cutting content in popular social media	DEPRESSION AND ANXIETY	10.1002/da.22668	WoS	TRUE
45	Min JY, Min KB.	2018	Night noise exposure and risk of death by suicide in adults living in metropolitan areas	Depress Anxiety	10.1002/da.22789	PubMed	FALSE
46	Kelsey C, Dreisbach C, Alhusen J, Grossmann T.	2019	A primer on investigating the role of the microbiome in brain and cognitive development	Dev Psychobiol	10.1002/dev.21778	PubMed	FALSE
47	Perone S, Gartstein MA.	2019	Mapping cortical rhythms to infant behavioral tendencies via baseline EEG and parent-report	Dev Psychobiol	10.1002/dev.21867	PubMed	FALSE
48	Perone, Sammy; Gartstein, Maria A.	2019	Mapping cortical rhythms to infant behavioral tendencies via baseline EEG and parent-report	DEVELOPMENTAL PSYCHOBIOLOGY	10.1002/dev.21867	WoS	TRUE
49	Amano T, Butt I, Peh KS.	2018	The importance of green spaces to public health: a multi-continental analysis	Ecol Appl	10.1002/eap.1748	PubMed	FALSE
50	Amano, Tatsuya; Butt, Isabel; Peh, Kelvin S. -H.	2018	The importance of green spaces to public health: a multi-continental analysis	ECOLOGICAL APPLICATIONS	10.1002/eap.1748	WoS	TRUE
51	Forbush KT, Wildes JE, Hunt TK.	2014	Gender norms, psychometric properties, and validity for the Eating Pathology Symptoms Inventory	Int J Eat Disord	10.1002/eat.22180	PubMed	FALSE
52	Forbush, Kelsie T.; Wildes, Jennifer E.; Hunt, Tyler K.	2014	Gender Norms, Psychometric Properties, and Validity for the Eating Pathology Symptoms Inventory	INTERNATIONAL JOURNAL OF EATING DISORDERS	10.1002/eat.22180	WoS	TRUE
53	Mehl A, Rohde P, Gau JM, Stice E.	2019	Disaggregating the predictive effects of impaired psychosocial functioning on future DSM-5 eating disorder onset in high-risk female adolescents	Int J Eat Disord	10.1002/eat.23082	PubMed	FALSE
54	Cooper C, Aguirre E, Barber JA, Bass N, Brodaty H, Burton A, Higgs P, Hunter R, Huntley J, Lang I, Kales HC, Marchant NL, Minihane AM, Ritchie K, Morgan-Trimmer S, Walker Z, Walters K, Wenborn J, Rapaport P.	2020	APPLE-Tree (Active Prevention in People at risk of dementia: Lifestyle, bEhaviour change and Technology to REducE cognitive and functional decline) programme: Protocol	Int J Geriatr Psychiatry	10.1002/gps.5249	PubMed	FALSE
55	Cooper, Claudia; Aguirre, Elisa; Barber, Julie A.; Bass, Nick; Brodaty, Henry; Burton, Alexandra; Higgs, Paul; Hunter, Rachael; Huntley, Jonathan; Lang, Iain; Kales, Helen C.; Marchant, Natalie L.; Minihane, Anne Marie; Ritchie, Karen; Morgan-Trimmer, Sarah; Walker, Zuzana; Walters, Kate; Wenborn, Jennifer; Rapaport, Penny	2020	APPLE-Tree (Active Prevention in People at risk of dementia: Lifestyle, bEhaviour change and Technology to REducE cognitive and functional decline) programme: Protocol	INTERNATIONAL JOURNAL OF GERIATRIC PSYCHIATRY	10.1002/gps.5249	WoS	TRUE
56	Wang R, Yang B, Liu P, Zhang J, Liu Y, Yao Y, Lu Y.	2020	The longitudinal relationship between exposure to air pollution and depression in older adults	Int J Geriatr Psychiatry	10.1002/gps.5277	PubMed	FALSE
57	Wang, Ruoyu; Yang, Boyi; Liu, Penghua; Zhang, Jinbao; Liu, Ye; Yao, Yao; Lu, Yi	2020	The longitudinal relationship between exposure to air pollution and depression in older adults	INTERNATIONAL JOURNAL OF GERIATRIC PSYCHIATRY	10.1002/gps.5277	WoS	TRUE
58	O'Muircheartaigh J, Dean DC 3rd, Ginestet CE, Walker L, Waskiewicz N, Lehman K, Dirks H, Piryatinsky I, Deoni SC.	2014	White matter development and early cognition in babies and toddlers	Hum Brain Mapp	10.1002/hbm.22488	PubMed	FALSE
59	O'Muircheartaigh, Jonathan; Dean, Douglas C., III; Ginestet, Cedric E.; Walker, Lindsay; Waskiewicz, Nicole; Lehman, Katie; Dirks, Holly; Piryatinsky, Irene; Deoni, Sean C. L.	2014	White Matter Development and Early Cognition in Babies and Toddlers	HUMAN BRAIN MAPPING	10.1002/hbm.22488	WoS	TRUE
60	Taya F, Dimitriadis SI, Dragomir A, Lim J, Sun Y, Wong KF, Thakor NV, Bezerianos A.	2018	Fronto-Parietal Subnetworks Flexibility Compensates For Cognitive Decline Due To Mental Fatigue	Hum Brain Mapp	10.1002/hbm.24192	PubMed	FALSE
61	Taya, Fumihiko; Dimitriadis, Stavros I.; Dragomir, Andrei; Lim, Julian; Sun, Yu; Wong, Kian Foong; Thakor, Nitish V.; Bezerianos, Anastasios	2018	Fronto-Parietal Subnetworks Flexibility Compensates For Cognitive Decline Due To Mental Fatigue	HUMAN BRAIN MAPPING	10.1002/hbm.24192	WoS	TRUE
62	Karrer TM, Bassett DS, Derntl B, Gruber O, Aleman A, Jardri R, Laird AR, Fox PT, Eickhoff SB, Grisel O, Varoquaux G, Thirion B, Bzdok D.	2019	Brain-based ranking of cognitive domains to predict schizophrenia	Hum Brain Mapp	10.1002/hbm.24716	PubMed	FALSE
63	Karrer, Teresa M.; Bassett, Danielle S.; Derntl, Birgit; Gruber, Oliver; Aleman, Andre; Jardri, Renaud; Laird, Angela R.; Fox, Peter T.; Eickhoff, Simon B.; Grisel, Olivier; Varoquaux, Gael; Thirion, Bertrand; Bzdok, Danilo	2019	Brain-based ranking of cognitive domains to predict schizophrenia	HUMAN BRAIN MAPPING	10.1002/hbm.24716	WoS	TRUE
64	Giuliano A, Donatelli G, Cosottini M, Tosetti M, Retico A, Fantacci ME.	2017	Hippocampal subfields at ultra high field MRI: An overview of segmentation and measurement methods	Hippocampus	10.1002/hipo.22717	PubMed	FALSE
65	Mmako NJ, Capetola T, Henderson-Wilson C.	2019	Sowing social inclusion for marginalised residents of a social housing development through a community garden	Health Promot J Austr	10.1002/hpja.225	PubMed	FALSE
66	Mmako, Nkolika J.; Capetola, Teresa; Henderson-Wilson, Claire	2019	Sowing social inclusion for marginalised residents of a social housing development through a community garden	HEALTH PROMOTION JOURNAL OF AUSTRALIA	10.1002/hpja.225	WoS	TRUE
67	Maynard AE, Greenfield PM, Childs CP.	2015	Developmental effects of economic and educational change: cognitive representation in three generations across 43���years in a Maya community	Int J Psychol	10.1002/ijop.12129	PubMed	FALSE
68	Maynard, Ashley E.; Greenfield, Patricia M.; Childs, Carla P.	2015	Developmental effects of economic and educational change: Cognitive representation in three generations across 43 years in a Maya community	INTERNATIONAL JOURNAL OF PSYCHOLOGY	10.1002/ijop.12129	WoS	TRUE
69	Clauss-Ehlers, Caroline S.; Parham, William D.	2014	Landscape of Diversity in Higher Education: Linking Demographic Shifts to Contemporary University and College Counseling Center Practices	JOURNAL OF MULTICULTURAL COUNSELING AND DEVELOPMENT	10.1002/j.2161-1912.2014.00045.x	WoS	FALSE
70	Hausberg MC, Schulz H, Andreas S.	2013	The relationship between individual resource realization and sociodemographic and clinical characteristics in mentally ill patients	J Clin Psychol	10.1002/jclp.21914	PubMed	FALSE
71	Hausberg, Maria Christina; Schulz, Holger; Andreas, Sylke	2013	The Relationship Between Individual Resource Realization and Sociodemographic and Clinical Characteristics in Mentally Ill Patients	JOURNAL OF CLINICAL PSYCHOLOGY	10.1002/jclp.21914	WoS	TRUE
72	Aiena BJ, Buchanan EM, Smith CV, Schulenberg SE.	2016	Meaning, Resilience, and Traumatic Stress After the Deepwater Horizon Oil Spill: A Study of Mississippi Coastal Residents Seeking Mental Health Services	J Clin Psychol	10.1002/jclp.22232	PubMed	FALSE
73	Aiena, Bethany J.; Buchanan, Erin M.; Smith, C. Veronica; Schulenberg, Stefan E.	2016	Meaning, Resilience, and Traumatic Stress After the Deepwater Horizon Oil Spill: A Study of Mississippi Coastal Residents Seeking Mental Health Services	JOURNAL OF CLINICAL PSYCHOLOGY	10.1002/jclp.22232	WoS	TRUE
74	Walsh S, Cassidy M, Priebe S.	2017	The Application of Positive Psychotherapy in Mental Health Care: A Systematic Review	J Clin Psychol	10.1002/jclp.22368	PubMed	FALSE
75	Felix, Erika D.; Afifi, Walid	2015	THE ROLE OF SOCIAL SUPPORT ON MENTAL HEALTH AFTER MULTIPLE WILDFIRE DISASTERS	JOURNAL OF COMMUNITY PSYCHOLOGY	10.1002/jcop.21671	WoS	FALSE
76	Kruger, Daniel J.; Cupal, Suzanne; Franzen, Susan P.; Kodjebacheva, Gergana; Bailey, Elder Sarah; Key, Kent D.; Kaufman, Martin M.	2017	Toxic trauma: Household water quality experiences predict posttraumatic stress disorder symptoms during the Flint, Michigan, water crisis	JOURNAL OF COMMUNITY PSYCHOLOGY	10.1002/jcop.21898	WoS	FALSE
77	Zhou Y, Lutz PE, Ibrahim EC, Courtet P, Tzavara E, Turecki G, Belzeaux R.	2020	Suicide and suicide behaviors: A review of transcriptomics and multiomics studies in psychiatric disorders	J Neurosci Res	10.1002/jnr.24367	PubMed	FALSE
78	Zhou, Yi; Lutz, Pierre-Eric; Ibrahim, El Cherif; Courtet, Philippe; Tzavara, Eleni; Turecki, Gustavo; Belzeaux, Raoul	2020	Suicide and suicide behaviors: A review of transcriptomics and multiomics studies in psychiatric disorders	JOURNAL OF NEUROSCIENCE RESEARCH	10.1002/jnr.24367	WoS	TRUE
79	Leiter, Michael P.; Hakanen, Jari J.; Ahola, Kirsi; Toppinen-Tanner, Salla; Koskinen, Aki; Vaananen, Ari	2013	Organizational predictors and health consequences of changes in burnout: A 12-year cohort study	JOURNAL OF ORGANIZATIONAL BEHAVIOR	10.1002/job.1830	WoS	FALSE
80	Bade MJ, Wolfe P, Zeni JA, Stevens-Lapsley JE, Snyder-Mackler L.	2012	Predicting poor physical performance after total knee arthroplasty	J Orthop Res	10.1002/jor.22140	PubMed	FALSE
81	Bade, Michael J.; Wolfe, Pamela; Zeni, Joseph A.; Stevens-Lapsley, Jennifer E.; Snyder-Mackler, Lynn	2012	Predicting poor physical performance after total knee arthroplasty	JOURNAL OF ORTHOPAEDIC RESEARCH	10.1002/jor.22140	WoS	TRUE
82	Brock RL, O'Hara MW, Hart KJ, McCabe-Beane JE, Williamson JA, Brunet A, Laplante DP, Yu C, King S.	2015	Peritraumatic Distress Mediates the Effect of Severity of Disaster Exposure on Perinatal Depression: The Iowa Flood Study	J Trauma Stress	10.1002/jts.22056	PubMed	FALSE
83	Brock, Rebecca L.; O'Hara, Michael W.; Hart, Kimberly J.; McCabe-Beane, Jennifer E.; Williamson, J. Austin; Brunet, Alain; Laplante, David P.; Yu, Chunbo; King, Suzanne	2015	Peritraumatic Distress Mediates the Effect of Severity of Disaster Exposure on Perinatal Depression: The Iowa Flood Study	JOURNAL OF TRAUMATIC STRESS	10.1002/jts.22056	WoS	TRUE
84	Gradus JL, King MW, Galatzer-Levy I, Street AE.	2017	Gender Differences in Machine Learning Models of Trauma and Suicidal Ideation in Veterans of the Iraq and Afghanistan Wars	J Trauma Stress	10.1002/jts.22210	PubMed	FALSE
85	Felix ED, Binmoeller C, Nylund-Gibson K, Benight CC, Benner AD, Terzieva A.	2019	Addressing Disaster Exposure Measurement Issues With Latent Class Analysis	J Trauma Stress	10.1002/jts.22368	PubMed	FALSE
86	Felix, Erika D.; Binmoeller, Cecile; Nylund-Gibson, Karen; Benight, Charles C.; Benner, Aprile D.; Terzieva, Antoniya	2019	Addressing Disaster Exposure Measurement Issues With Latent Class Analysis	JOURNAL OF TRAUMATIC STRESS	10.1002/jts.22368	WoS	TRUE
87	Schwartz RM, Rasul R, Gargano LM, Lieberman-Cribbin W, Brackbill RM, Taioli E.	2019	Examining Associations Between Hurricane Sandy Exposure and Posttraumatic Stress Disorder by Community of Residence	J Trauma Stress	10.1002/jts.22445	PubMed	FALSE
88	Schwartz, Rebecca M.; Rasul, Rehana; Gargano, Lisa M.; Lieberman-Cribbin, Wil; Brackbill, Robert M.; Taioli, Emanuela	2019	Examining Associations Between Hurricane Sandy Exposure and Posttraumatic Stress Disorder by Community of Residence	JOURNAL OF TRAUMATIC STRESS	10.1002/jts.22445	WoS	TRUE
89	Lerche S, Wurster I, Roeben B, Zimmermann M, Riebenbauer B, Deuschle C, Hauser AK, Schulte C, Berg D, Maetzler W, Waniek K, Lachmann I, Liepelt-Scarfone I, Gasser T, Brockmann K.	2020	Parkinson's Disease: Glucocerebrosidase 1 Mutation Severity Is Associated with CSF Alpha-Synuclein Profiles	Mov Disord	10.1002/mds.27884	PubMed	FALSE
90	Lerche, Stefanie; Wurster, Isabel; Roeben, Benjamin; Zimmermann, Milan; Riebenbauer, Benjamin; Deuschle, Christian; Hauser, Ann-Kathrin; Schulte, Claudia; Berg, Daniela; Maetzler, Walter; Waniek, Katharina; Lachmann, Ingolf; Liepelt-Scarfone, Inga; Gasser, Thomas; Brockmann, Kathrin	2020	Parkinson's Disease: Glucocerebrosidase 1 Mutation Severity Is Associated with CSF Alpha-Synuclein Profiles	MOVEMENT DISORDERS	10.1002/mds.27884	WoS	TRUE
91	Barrig??n ML, Berrouiguet S, Carballo JJ, Bonal-Gim?�nez C, Fern?�ndez-Navarro P, Pfang B, Delgado-G??mez D, Courtet P, Aroca F, Lopez-Castroman J, Art?�s-Rodr?�guez A, Baca-Garc?�a E; MEmind study group.	2017	User profiles of an electronic mental health tool for ecological momentary assessment: MEmind	Int J Methods Psychiatr Res	10.1002/mpr.1554	PubMed	FALSE
92	Luisa Barrigon, Maria; Berrouiguet, Sofian; Jose Carballo, Juan; Bonal-Gimenez, Covadonga; Fernandez-Navarro, Pablo; Pfang, Bernadette; Delgado-Gomez, David; Courtet, Philippe; Aroca, Fuensanta; Lopez-Castroman, Jorge; Artes-Rodriguez, Antonio; Baca-Garcia, Enrique	2017	User profiles of an electronic mental health tool for ecological momentary assessment: MEmind	INTERNATIONAL JOURNAL OF METHODS IN PSYCHIATRIC RESEARCH	10.1002/mpr.1554	WoS	TRUE
93	Meneses K, Azuero A, Su X, Benz R, McNees P.	2014	Predictors of attrition among rural breast cancer survivors	Res Nurs Health	10.1002/nur.21576	PubMed	FALSE
94	Meneses, Karen; Azuero, Andres; Su, Xiaogang; Benz, Rachel; McNees, Patrick	2014	Predictors of Attrition Among Rural Breast Cancer Survivors	RESEARCH IN NURSING & HEALTH	10.1002/nur.21576	WoS	TRUE
95	Brooks JL, Asafu-Adjei J, Currin EG, Beeber LS.	2020	Exploring a broader context of the home environment and its relationship with asthma control in American?�Indian children	Res Nurs Health	10.1002/nur.22020	PubMed	FALSE
96	Brooks, Jada L.; Asafu-Adjei, Josephine; Currin, Emily G.; Beeber, Linda S.	2020	Exploring a broader context of the home environment and its relationship with asthma control in American Indian children	RESEARCH IN NURSING & HEALTH	10.1002/nur.22020	WoS	TRUE
97	Lunansky, Gabriela; van Borkulo, Claudia; Borsboom, Denny	2020	Personality, Resilience, and Psychopathology: A Model for the Interaction between Slow and Fast Network Processes in the Context of Mental Health	EUROPEAN JOURNAL OF PERSONALITY	10.1002/per.2263	WoS	FALSE
98	Day NJS, Hunt A, Cortis-Jones L, Grenyer BFS.	2018	Clinician attitudes towards borderline personality disorder: A 15-year comparison	Personal Ment Health	10.1002/pmh.1429	PubMed	FALSE
99	Day, Nicholas J. S.; Hunt, Annalise; Cortis-Jones, Louise; Grenyer, Brin F. S.	2018	Clinician attitudes towards borderline personality disorder: A 15-year comparison	PERSONALITY AND MENTAL HEALTH	10.1002/pmh.1429	WoS	TRUE
100	Conway, Christopher C.; Simms, Leonard J.	2020	Maximizing the applied value of structural models of psychopathology: Introduction to a special issue of Personality and Mental Health	PERSONALITY AND MENTAL HEALTH	10.1002/pmh.1474	WoS	FALSE
101	Garg RK, Mahadevan A, Malhotra HS, Rizvi I, Kumar N, Uniyal R.	2019	Subacute sclerosing panencephalitis	Rev Med Virol	10.1002/rmv.2058	PubMed	FALSE
102	Garg, Ravindra Kumar; Mahadevan, Anita; Malhotra, Hardeep Singh; Rizvi, Imran; Kumar, Neeraj; Uniyal, Ravi	2019	Subacute sclerosing panencephalitis	REVIEWS IN MEDICAL VIROLOGY	10.1002/rmv.2058	WoS	TRUE
103	Tallman, Paula Skye	2019	Water insecurity and mental health in the Amazon: Economic and ecological drivers of distress	ECONOMIC ANTHROPOLOGY	10.1002/sea2.12144	WoS	FALSE
104	Sargent L, Nalls M, Amella EJ, Slattum PW, Mueller M, Bandinelli S, Tian Q, Swift-Scanlan T, Lageman SK, Singleton A.	2020	Shared mechanisms for cognitive impairment and physical frailty: A model for complex systems	Alzheimers Dement (N Y)	10.1002/trc2.12027	PubMed	FALSE
105	Prasetiawan, Teddy; Nastiti, Anindrya; Muntalif, Barti Setiani	2017	'Bad' piped water and other perceptual drivers of bottled water consumption in Indonesia	WILEY INTERDISCIPLINARY REVIEWS-WATER	10.1002/wat2.1219	WoS	FALSE
106	Mareschal D.	2010	Computational perspectives on cognitive development	Wiley Interdiscip Rev Cogn Sci	10.1002/wcs.67	PubMed	FALSE
107	Mareschal, Denis	2010	Computational perspectives on cognitive development	WILEY INTERDISCIPLINARY REVIEWS-COGNITIVE SCIENCE	10.1002/wcs.67	WoS	TRUE
108	Kessler RC, Rose S, Koenen KC, Karam EG, Stang PE, Stein DJ, Heeringa SG, Hill ED, Liberzon I, McLaughlin KA, McLean SA, Pennell BE, Petukhova M, Rosellini AJ, Ruscio AM, Shahly V, Shalev AY, Silove D, Zaslavsky AM, Angermeyer MC, Bromet EJ, de Almeida JM, de Girolamo G, de Jonge P, Demyttenaere K, Florescu SE, Gureje O, Haro JM, Hinkov H, Kawakami N, Kovess-Masfety V, Lee S, Medina-Mora ME, Murp…	2014	How well can post-traumatic stress disorder be predicted from pre-trauma risk factors? An exploratory study in the WHO World Mental Health Surveys	World Psychiatry	10.1002/wps.20150	PubMed	FALSE
109	Kessler, Ronald C.; Rose, Sherri; Koenen, Karestan C.; Karam, Elie G.; Stang, Paul E.; Stein, Dan J.; Heeringa, Steven G.; Hill, Eric D.; Liberzon, Israel; McLaughlin, Katie A.; McLean, Samuel A.; Pennell, Beth E.; Petukhova, Maria; Rosellini, Anthony J.; Ruscio, Ayelet M.; Shahly, Victoria; Shalev, Arieh Y.; Silove, Derrick; Zaslavsky, Alan M.; Angermeyer, Matthias C.; Bromet, Evelyn J.; Caldas …	2014	How well can post-traumatic stress disorder be predicted from pre-trauma risk factors? An exploratory study in the WHO World Mental Health Surveys	WORLD PSYCHIATRY	10.1002/wps.20150	WoS	TRUE
110	Neubert, Peer; Protzel, Peter	2018	Towards Hypervector Representations for Learning and Planning with Schemas	Lecture Notes in Artificial Intelligence	10.1007/978-3-030-00111-7_16	WoS	FALSE
111	Trancoso, Isabel; Correia, Joana; Teixeira, Francisco; Raj, Bhiksha; Abad, Alberto	2018	Analysing Speech for Clinical Applications	Lecture Notes in Artificial Intelligence	10.1007/978-3-030-00810-9_1	WoS	FALSE
112	Liu, Xiaodong; Liu, Qi; Zou, Yanyun; Liu, Qiang	2020	A LSTM-Based Approach to Haze Prediction Using a Self-organizing Single Hidden Layer Scheme	Advances in Intelligent Systems and Computing	10.1007/978-3-030-16946-6_57	WoS	FALSE
113	Pannese, L.; Wortley, D.; Ascolese, A.	2016	Gamified Wellbeing for All Ages - How Technology and Gamification Can Support Physical and Mental Wellbeing in the Ageing Society	IFMBE Proceedings	10.1007/978-3-319-32703-7_245	WoS	FALSE
114	Chang, Zhuoqing; Qiu, Qiang; Sapiro, Guillermo	2016	Synthesis-Based Low-Cost Gaze Analysis	Communications in Computer and Information Science	10.1007/978-3-319-40542-1_15	WoS	FALSE
115	Sattler, David N.	2017	Climate Change and Extreme Weather Events: The Mental Health Impact	Climate Change Management	10.1007/978-3-319-50094-2_4	WoS	FALSE
116	Garcia-Martinez, Beatriz; Martinez-Rodrigo, Arturo; Fernandez-Caballero, Antonio; Gonzalez, Pascual; Alcaraz, Raul	2017	Conditional Entropy Estimates for Distress Detection with EEG Signals	Lecture Notes in Computer Science	10.1007/978-3-319-59740-9_19	WoS	FALSE
117	Kayihan, Kutlu Sevinc	2018	Examination of Biophilia Phenomenon in the Context of Sustainable Architecture	Lecture Notes in Civil Engineering	10.1007/978-3-319-63709-9_7	WoS	FALSE
118	Zhou, Xin; Salinas, Emilio; Stanford, Terrence R.; Constantinidis, Christos	2016	Dynamic Interactions in Prefrontal Functional Connectivity During Adolescence	Advances in Cognitive Neurodynamics	10.1007/978-981-10-0207-6_27	WoS	FALSE
119	Grimm A, Biliouris EE, Lang UE, G?�tz J, Mensah-Nyagan AG, Eckert A.	2016	Sex hormone-related neurosteroids differentially rescue bioenergetic deficits induced by amyloid-?? or hyperphosphorylated tau protein	Cell Mol Life Sci	10.1007/s00018-015-1988-x	PubMed	FALSE
120	Adak, Atanu; Khan, Mojibur R.	2019	An insight into gut microbiota and its functionalities	CELLULAR AND MOLECULAR LIFE SCIENCES	10.1007/s00018-018-2943-4	WoS	FALSE
121	Berry HL, Bowen K, Kjellstrom T.	2010	Climate change and mental health: a causal pathways framework	Int J Public Health	10.1007/s00038-009-0112-0	PubMed	FALSE
122	Berry, Helen Louise; Bowen, Kathryn; Kjellstrom, Tord	2010	Climate change and mental health: a causal pathways framework	INTERNATIONAL JOURNAL OF PUBLIC HEALTH	10.1007/s00038-009-0112-0	WoS	TRUE
123	Cheng JJ, Berry P.	2013	Health co-benefits and risks of public health adaptation strategies to climate change: a review of current literature	Int J Public Health	10.1007/s00038-012-0422-5	PubMed	FALSE
124	Heaney AK, Winter SJ.	2016	Climate-driven migration: an exploratory case study of Maasai health perceptions and help-seeking behaviors	Int J Public Health	10.1007/s00038-015-0759-7	PubMed	FALSE
125	Heaney, Alexandra K.; Winter, Sandra J.	2016	Climate-driven migration: an exploratory case study of Maasai health perceptions and help-seeking behaviors	INTERNATIONAL JOURNAL OF PUBLIC HEALTH	10.1007/s00038-015-0759-7	WoS	TRUE
126	Min KB, Kim HJ, Kim HJ, Min JY.	2017	Parks and green areas and the risk for depression and suicidal indicators	Int J Public Health	10.1007/s00038-017-0958-5	PubMed	FALSE
127	Min, Kyoung-bok; Kim, Hyun-Jin; Kim, Hye-Jin; Min, Jin-young	2017	Parks and green areas and the risk for depression and suicidal indicators	INTERNATIONAL JOURNAL OF PUBLIC HEALTH	10.1007/s00038-017-0958-5	WoS	TRUE
128	Bein T, Karagiannidis C, Gr??ndling M, Quintel M.	2020	[New challenges for intensive care medicine due to climate change and global warming]	Anaesthesist	10.1007/s00101-020-00783-w	PubMed	FALSE
129	Bozorgmehr K, Mohsenpour A, Saure D, Stock C, Loerbroks A, Joos S, Schneider C.	2016	[Systematic review and evidence mapping of empirical studies on health status and medical care among refugees and asylum seekers in Germany (1990-2014)]	Bundesgesundheitsblatt Gesundheitsforschung Gesundheitsschutz	10.1007/s00103-016-2336-5	PubMed	FALSE
130	Bunz M, M??cke HG.	2017	[Climate change - physical and mental consequences]	Bundesgesundheitsblatt Gesundheitsforschung Gesundheitsschutz	10.1007/s00103-017-2548-3	PubMed	FALSE
131	B?�ge I, Schepker R, Fegert JM.	2019	[Intensive psychiatric care of children and adolescents in their natural environment : Alternatives to inpatient treatment]	Bundesgesundheitsblatt Gesundheitsforschung Gesundheitsschutz	10.1007/s00103-018-2874-0	PubMed	FALSE
132	Mambrey V, Wermuth I, B?�se-O'Reilly S.	2019	[Extreme weather events and their impact on the mental health of children and adolescents]	Bundesgesundheitsblatt Gesundheitsforschung Gesundheitsschutz	10.1007/s00103-019-02937-7	PubMed	FALSE
133	Mundt CH, Hoffmann K, Wilmanns J.	2011	[Karl Wilmanns' theoretical contributions and his clinical practice. What does it mean for contemporary psychiatry?]	Nervenarzt	10.1007/s00115-010-3167-5	PubMed	FALSE
134	Zhao X.	2017	[The first Mental Health Act in China 2013 : An?�historical step towards human rights]	Nervenarzt	10.1007/s00115-017-0314-2	PubMed	FALSE
135	Pervilhac C, Schoilew K, Znoj H, M??ller TJ.	2020	[Weather and suicide : Association between meteorological variables and suicidal behavior-a?�systematic qualitative review article]	Nervenarzt	10.1007/s00115-019-00795-x	PubMed	FALSE
136	Pr???� H, K?�hler S, M??ller S.	2020	[Autoimmune encephalitis-Diagnostic and therapeutic decision tree from a psychiatric, neurological and ethico-legal point of view : Approach in cases of lack of ability to give consent and permissibility of compulsory treatment]	Nervenarzt	10.1007/s00115-019-00802-1	PubMed	FALSE
137	H?�fner H.	2019	[Bernhard von Gudden's psychiatric assessment and the deposition of King Ludwig?�II of Bavaria in 1886 : Comments on the article by R.?�Steinberg in Der Nervenarzt 01/2019]	Nervenarzt	10.1007/s00115-019-0769-4	PubMed	FALSE
138	McKenzie DP, Creamer M, Kelsall HL, Forbes AB, Ikin JF, Sim MR, McFarlane AC.	2010	Temporal relationships between Gulf War deployment and subsequent psychological disorders in Royal Australian Navy Gulf War veterans	Soc Psychiatry Psychiatr Epidemiol	10.1007/s00127-009-0134-1	PubMed	FALSE
139	Kelly BJ, Lewin TJ, Stain HJ, Coleman C, Fitzgerald M, Perkins D, Carr VJ, Fragar L, Fuller J, Lyle D, Beard JR.	2011	Determinants of mental health and well-being within rural and remote communities	Soc Psychiatry Psychiatr Epidemiol	10.1007/s00127-010-0305-0	PubMed	FALSE
140	Le, Felice; Tracy, Melissa; Norris, Fran H.; Galea, Sandro	2013	Displacement, county social cohesion, and depression after a large-scale traumatic event	SOCIAL PSYCHIATRY AND PSYCHIATRIC EPIDEMIOLOGY	10.1007/s00127-013-0698-7	WoS	FALSE
141	Guimar?�es R, Fleming M, Cardoso MF.	2014	Validation of the Orbach & Mikulincer Mental Pain Scale (OMMP) on a drug addicted population	Soc Psychiatry Psychiatr Epidemiol	10.1007/s00127-013-0751-6	PubMed	FALSE
142	Guimaraes, Rui; Fleming, Manuela; Cardoso, Margarida Fonseca	2014	Validation of the Orbach & Mikulincer Mental Pain Scale (OMMP) on a drug addicted population	SOCIAL PSYCHIATRY AND PSYCHIATRIC EPIDEMIOLOGY	10.1007/s00127-013-0751-6	WoS	TRUE
143	Iyegbe C, Campbell D, Butler A, Ajnakina O, Sham P.	2014	The emerging molecular architecture of schizophrenia, polygenic risk scores and the clinical implications for GxE research	Soc Psychiatry Psychiatr Epidemiol	10.1007/s00127-014-0823-2	PubMed	FALSE
144	Iyegbe, Conrad; Campbell, Desmond; Butler, Amy; Ajnakina, Olesya; Sham, Pak	2014	The emerging molecular architecture of schizophrenia, polygenic risk scores and the clinical implications for GxE research	SOCIAL PSYCHIATRY AND PSYCHIATRIC EPIDEMIOLOGY	10.1007/s00127-014-0823-2	WoS	TRUE
145	Vaughn MG, Salas-Wright CP, DeLisi M, Qian Z.	2015	The antisocial family tree: family histories of behavior problems in antisocial personality in the United States	Soc Psychiatry Psychiatr Epidemiol	10.1007/s00127-014-0987-9	PubMed	FALSE
146	Vaughn, Michael G.; Salas-Wright, Christopher P.; DeLisi, Matt; Qian, Zhengmin	2015	The antisocial family tree: family histories of behavior problems in antisocial personality in the United States	SOCIAL PSYCHIATRY AND PSYCHIATRIC EPIDEMIOLOGY	10.1007/s00127-014-0987-9	WoS	TRUE
147	Yagi J, Fujiwara T, Yambe T, Okuyama M, Kawachi I, Sakai A.	2016	Does social capital reduce child behavior problems? Results from the Great East Japan Earthquake follow-up for Children Study	Soc Psychiatry Psychiatr Epidemiol	10.1007/s00127-016-1227-2	PubMed	FALSE
148	Yagi, Junko; Fujiwara, Takeo; Yambe, Takehito; Okuyama, Makiko; Kawachi, Ichiro; Sakai, Akio	2016	Does social capital reduce child behavior problems? Results from the Great East Japan Earthquake follow-up for Children Study	SOCIAL PSYCHIATRY AND PSYCHIATRIC EPIDEMIOLOGY	10.1007/s00127-016-1227-2	WoS	TRUE
149	Larvin H, Peckham E, Prady SL.	2019	Case-finding for common mental disorders in primary care using routinely collected data: a systematic review	Soc Psychiatry Psychiatr Epidemiol	10.1007/s00127-019-01744-4	PubMed	FALSE
150	Larvin, Harriet; Peckham, Emily; Prady, Stephanie L.	2019	Case-finding for common mental disorders in primary care using routinely collected data: a systematic review	SOCIAL PSYCHIATRY AND PSYCHIATRIC EPIDEMIOLOGY	10.1007/s00127-019-01744-4	WoS	TRUE
151	Collier KM, Weiss B, Pollack A, Lam T.	2020	Explanatory variables for women's increased risk for mental health problems in Vietnam	Soc Psychiatry Psychiatr Epidemiol	10.1007/s00127-019-01761-3	PubMed	FALSE
152	Collier, K. Megan; Weiss, Bahr; Pollack, Amie; Lam, Trung	2020	Explanatory variables for women's increased risk for mental health problems in Vietnam	SOCIAL PSYCHIATRY AND PSYCHIATRIC EPIDEMIOLOGY	10.1007/s00127-019-01761-3	WoS	TRUE
153	Weiss B, Dang HM, Lam TT, Nguyen MC.	2020	Urbanization, and child mental health and life functioning in Vietnam: implications for global health disparities	Soc Psychiatry Psychiatr Epidemiol	10.1007/s00127-020-01838-4	PubMed	FALSE
154	Weiss, Bahr; Hoang-Minh Dang; Lam, Trung T.; Nguyen, Minh C.	2020	Urbanization, and child mental health and life functioning in Vietnam: implications for global health disparities	SOCIAL PSYCHIATRY AND PSYCHIATRIC EPIDEMIOLOGY	10.1007/s00127-020-01838-4	WoS	TRUE
155	Rossi M, Candelise N, Baiardi S, Capellari S, Giannini G, Orr?? CD, Antelmi E, Mammana A, Hughson AG, Calandra-Buonaura G, Ladogana A, Plazzi G, Cortelli P, Caughey B, Parchi P.	2020	Ultrasensitive RT-QuIC assay with high sensitivity and specificity for Lewy body-associated synucleinopathies	Acta Neuropathol	10.1007/s00401-020-02160-8	PubMed	FALSE
156	Rossi, Marcello; Candelise, Niccolo; Baiardi, Simone; Capellari, Sabina; Giannini, Giulia; Orru, Christina D.; Antelmi, Elena; Mammana, Angela; Hughson, Andrew G.; Calandra-Buonaura, Giovanna; Ladogana, Anna; Plazzi, Giuseppe; Cortelli, Pietro; Caughey, Byron; Parchi, Piero	2020	Ultrasensitive RT-QuIC assay with high sensitivity and specificity for Lewy body-associated synucleinopathies	ACTA NEUROPATHOLOGICA	10.1007/s00401-020-02160-8	WoS	TRUE
157	Boormans EM, Birnie E, Hoffer MJ, Macville MV, Galjaard RJ, Schuring-Blom GH, Bhola SL, Huijsdens K, Smits A, van Lith JM.	2012	Economic evaluation of multiplex ligation-dependent probe amplification and karyotyping in prenatal diagnosis: a cost-minimization analysis	Arch Gynecol Obstet	10.1007/s00404-011-1921-y	PubMed	FALSE
158	Di Nardo W, Anzivino R, Giannantonio S, Schinaia L, Paludetti G.	2014	The effects of cochlear implantation on quality of life in the elderly	Eur Arch Otorhinolaryngol	10.1007/s00405-013-2396-1	PubMed	FALSE
159	Di Nardo, W.; Anzivino, R.; Giannantonio, S.; Schinaia, L.; Paludetti, G.	2014	The effects of cochlear implantation on quality of life in the elderly	EUROPEAN ARCHIVES OF OTO-RHINO-LARYNGOLOGY	10.1007/s00405-013-2396-1	WoS	TRUE
160	Smarius LJCA, Strieder TGA, Doreleijers TAH, Vrijkotte TGM, Zafarmand MH, de Rooij SR.	2020	Maternal verbal aggression in early infancy and child's internalizing symptoms: interaction by common oxytocin polymorphisms	Eur Arch Psychiatry Clin Neurosci	10.1007/s00406-019-01013-0	PubMed	FALSE
161	Smarius, Laetitia J. C. A.; Strieder, Thea G. A.; Doreleijers, Theo A. H.; Vrijkotte, Tanja G. M.; Zafarmand, M. Hadi; de Rooij, Susanne R.	2020	Maternal verbal aggression in early infancy and child's internalizing symptoms: interaction by common oxytocin polymorphisms	EUROPEAN ARCHIVES OF PSYCHIATRY AND CLINICAL NEUROSCIENCE	10.1007/s00406-019-01013-0	WoS	TRUE
162	Thorsen SV, Burr H, Diderichsen F, Bjorner JB.	2013	A one-item workability measure mediates work demands, individual resources and health in the prediction of sickness absence	Int Arch Occup Environ Health	10.1007/s00420-012-0807-z	PubMed	FALSE
163	Thorsen, Sannie Vester; Burr, Hermann; Diderichsen, Finn; Bjorner, Jakob Bue	2013	A one-item workability measure mediates work demands, individual resources and health in the prediction of sickness absence	INTERNATIONAL ARCHIVES OF OCCUPATIONAL AND ENVIRONMENTAL HEALTH	10.1007/s00420-012-0807-z	WoS	TRUE
164	Groneberg DA, Braumann H, Rolle S, Quarcoo D, Klingelh?�fer D, Fischer A, Nienhaus A, Br??ggmann D.	2020	Needlestick injuries: a density-equalizing mapping and socioeconomic analysis of the global research	Int Arch Occup Environ Health	10.1007/s00420-020-01547-0	PubMed	FALSE
165	van Hoffen MFA, Norder G, Twisk JWR, Roelen CAM.	2020	External validation of a prediction model and decision tree for sickness absence due to mental disorders	Int Arch Occup Environ Health	10.1007/s00420-020-01548-z	PubMed	FALSE
166	van Hoffen, Marieke F. A.; Norder, Giny; Twisk, Jos W. R.; Roelen, Corne A. M.	2020	External validation of a prediction model and decision tree for sickness absence due to mental disorders	INTERNATIONAL ARCHIVES OF OCCUPATIONAL AND ENVIRONMENTAL HEALTH	10.1007/s00420-020-01548-z	WoS	TRUE
167	Wray J, Cassedy A, Ernst MM, Franklin RC, Brown K, Marino BS.	2018	Psychosocial functioning of parents of children with heart disease-describing the landscape	Eur J Pediatr	10.1007/s00431-018-3250-7	PubMed	FALSE
168	Yackerson NS, Zilberman A, Todder D, Kaplan Z.	2014	The influence of air-suspended particulate concentration on the incidence of suicide attempts and exacerbation of schizophrenia	Int J Biometeorol	10.1007/s00484-012-0624-9	PubMed	FALSE
169	Yackerson, Naomy S.; Zilberman, Arkadi; Todder, Doron; Kaplan, Zeev	2014	The influence of air-suspended particulate concentration on the incidence of suicide attempts and exacerbation of schizophrenia	INTERNATIONAL JOURNAL OF BIOMETEOROLOGY	10.1007/s00484-012-0624-9	WoS	TRUE
170	Tapak L, Maryanaji Z, Hamidi O, Abbasi H, Najafi-Vosough R.	2018	Investigating the effect of climatic parameters on mental disorder admissions	Int J Biometeorol	10.1007/s00484-018-1605-4	PubMed	FALSE
171	Tapak, Leili; Maryanaji, Zohreh; Hamidi, Omid; Abbasi, Hamed; Najafi-Vosough, Roya	2018	Investigating the effect of climatic parameters on mental disorder admissions	INTERNATIONAL JOURNAL OF BIOMETEOROLOGY	10.1007/s00484-018-1605-4	WoS	TRUE
172	Lee GL, Pang GS, Akhileswaran R, Ow MY, Fan GK, Wong CC, Wee HL, Cheung YB.	2016	Understanding domains of health-related quality of life concerns of Singapore Chinese patients with advanced cancer: a qualitative analysis	Support Care Cancer	10.1007/s00520-015-2886-3	PubMed	FALSE
173	Lee, G. L.; Pang, G. S. Y.; Akhileswaran, R.; Ow, M. Y. L.; Fan, G. K. T.; Wong, C. C. F.; Wee, H. L.; Cheung, Y. B.	2016	Understanding domains of health-related quality of life concerns of Singapore Chinese patients with advanced cancer: a qualitative analysis	SUPPORTIVE CARE IN CANCER	10.1007/s00520-015-2886-3	WoS	TRUE
174	Boyle T, Vallance JK, Ransom EK, Lynch BM.	2016	How sedentary and physically active are breast cancer survivors, and which population subgroups have higher or lower levels of these behaviors?	Support Care Cancer	10.1007/s00520-015-3011-3	PubMed	FALSE
175	Boyle, Terry; Vallance, Jeff K.; Ransom, Emily K.; Lynch, Brigid M.	2016	How sedentary and physically active are breast cancer survivors, and which population subgroups have higher or lower levels of these behaviors?	SUPPORTIVE CARE IN CANCER	10.1007/s00520-015-3011-3	WoS	TRUE
176	Gu, Kuiying; Zhou, Yi; Sun, Hui; Zhao, Lianming; Liu, Shaokun	2020	Prediction of air quality in Shenzhen based on neural network algorithm	NEURAL COMPUTING & APPLICATIONS	10.1007/s00521-019-04492-3	WoS	FALSE
177	Cheong JLY, Burnett AC, Treyvaud K, Spittle AJ.	2020	Early environment and long-term outcomes of preterm infants	J Neural Transm (Vienna)	10.1007/s00702-019-02121-w	PubMed	FALSE
178	Cheong, Jeanie L. Y.; Burnett, Alice C.; Treyvaud, Karli; Spittle, Alicia J.	2020	Early environment and long-term outcomes of preterm infants	JOURNAL OF NEURAL TRANSMISSION	10.1007/s00702-019-02121-w	WoS	TRUE
179	Rhodes AM, Segre LS.	2013	Perinatal depression: a review of US legislation and law	Arch Womens Ment Health	10.1007/s00737-013-0359-6	PubMed	FALSE
180	Rhodes, Ann M.; Segre, Lisa S.	2013	Perinatal depression: a review of US legislation and law	ARCHIVES OF WOMENS MENTAL HEALTH	10.1007/s00737-013-0359-6	WoS	TRUE
181	Br??ggmann D, Wagner C, Klingelh?�fer D, Sch?�ffel N, Bendels M, Louwen F, Jaque J, Groneberg DA.	2017	Maternal depression research: socioeconomic analysis and density-equalizing mapping of the global research architecture	Arch Womens Ment Health	10.1007/s00737-016-0669-6	PubMed	FALSE
182	Brueggmann, Doerthe; Wagner, Christina; Klingelhoefer, Doris; Schoeffel, Norman; Bendels, Michael; Louwen, Frank; Jaque, Jenny; Groneberg, David A.	2017	Maternal depression research: socioeconomic analysis and density-equalizing mapping of the global research architecture	ARCHIVES OF WOMENS MENTAL HEALTH	10.1007/s00737-016-0669-6	WoS	TRUE
183	Kildea S, Simcock G, Liu A, Elgbeili G, Laplante DP, Kahler A, Austin MP, Tracy S, Kruske S, Tracy M, O'Hara MW, King S.	2018	Continuity of midwifery carer moderates the effects of prenatal maternal stress on postnatal maternal wellbeing: the Queensland flood study	Arch Womens Ment Health	10.1007/s00737-017-0781-2	PubMed	FALSE
184	Kildea, Sue; Simcock, Gabrielle; Liu, Aihua; Elgbeili, Guillaume; Laplante, David P.; Kahler, Adele; Austin, Marie-Paule; Tracy, Sally; Kruske, Sue; Tracy, Mark; O'Hara, Michael W.; King, Suzanne	2018	Continuity of midwifery carer moderates the effects of prenatal maternal stress on postnatal maternal wellbeing: the Queensland flood study	ARCHIVES OF WOMENS MENTAL HEALTH	10.1007/s00737-017-0781-2	WoS	TRUE
185	Garza-Lomb?? C, Pappa A, Panayiotidis MI, Gonsebatt ME, Franco R.	2019	Arsenic-induced neurotoxicity: a mechanistic appraisal	J Biol Inorg Chem	10.1007/s00775-019-01740-8	PubMed	FALSE
186	Garza-Lombo, Carla; Pappa, Aglaia; Panayiotidis, Mihalis, I; Gonsebatt, Maria E.; Franco, Rodrigo	2019	Arsenic-induced neurotoxicity: a mechanistic appraisal	JOURNAL OF BIOLOGICAL INORGANIC CHEMISTRY	10.1007/s00775-019-01740-8	WoS	TRUE
187	Daley D, O'Brien M.	2013	A small-scale randomized controlled trial of the self-help version of the New Forest Parent Training Programme for children with ADHD symptoms	Eur Child Adolesc Psychiatry	10.1007/s00787-013-0396-8	PubMed	FALSE
188	Daley, David; O'Brien, Michelle	2013	A small-scale randomized controlled trial of the self-help version of the New Forest Parent Training Programme for children with ADHD symptoms	EUROPEAN CHILD & ADOLESCENT PSYCHIATRY	10.1007/s00787-013-0396-8	WoS	TRUE
189	Wolpert M, Zamperoni V, Napoleone E, Patalay P, Jacob J, Fokkema M, Promberger M, Costa da Silva L, Patel M, Edbrooke-Childs J.	2020	Predicting mental health improvement and deterioration in a large community sample of 11- to 13-year-olds	Eur Child Adolesc Psychiatry	10.1007/s00787-019-01334-4	PubMed	FALSE
190	Warner G, Keeshin B, Sarkadi A.	2020	Mapping trauma support onto the shifting landscape of seeking refuge in Sweden: insights from an ongoing programme of research on refugee minors' mental health	Eur Child Adolesc Psychiatry	10.1007/s00787-020-01592-7	PubMed	FALSE
191	Warner, Georgina; Keeshin, Brooks; Sarkadi, Anna	2020	Mapping trauma support onto the shifting landscape of seeking refuge in Sweden: insights from an ongoing programme of research on refugee minors' mental health	EUROPEAN CHILD & ADOLESCENT PSYCHIATRY	10.1007/s00787-020-01592-7	WoS	TRUE
192	Brucoli M, Baena RRY, Boffano P, Benech A.	2019	Psychological profiles in patients undergoing orthognathic surgery or rhinoplasty: a preoperative and preliminary comparison	Oral Maxillofac Surg	10.1007/s10006-019-00758-1	PubMed	FALSE
193	Brucoli, Matteo; Baena, Ruggero Rodriguez Y.; Boffano, Paolo; Benech, Arnaldo	2019	Psychological profiles in patients undergoing orthognathic surgery or rhinoplasty: a preoperative and preliminary comparison	ORAL AND MAXILLOFACIAL SURGERY-HEIDELBERG	10.1007/s10006-019-00758-1	WoS	TRUE
194	Potvin DA.	2017	Coping with a changing soundscape: avoidance, adjustments and adaptations	Anim Cogn	10.1007/s10071-016-0999-9	PubMed	FALSE
195	Potvin, Dominique A.	2017	Coping with a changing soundscape: avoidance, adjustments and adaptations	ANIMAL COGNITION	10.1007/s10071-016-0999-9	WoS	TRUE
196	Riley JL, Noble DWA, Byrne RW, Whiting MJ.	2017	Does social environment influence learning ability in a family-living lizard?	Anim Cogn	10.1007/s10071-016-1068-0	PubMed	FALSE
197	Riley, Julia L.; Noble, Daniel W. A.; Byrne, Richard W.; Whiting, Martin J.	2017	Does social environment influence learning ability in a family-living lizard?	ANIMAL COGNITION	10.1007/s10071-016-1068-0	WoS	TRUE
198	Belin L, Formanek L, Heyraud C, Hausberger M, Henry L.	2018	Influence of early experience on processing 2D threatening pictures by European starlings (Sturnus vulgaris)	Anim Cogn	10.1007/s10071-018-1207-x	PubMed	FALSE
199	Belin, Laurine; Formanek, Laureline; Heyraud, Christine; Hausberger, Martine; Henry, Laurence	2018	Influence of early experience on processing 2D threatening pictures by European starlings (Sturnus vulgaris)	ANIMAL COGNITION	10.1007/s10071-018-1207-x	WoS	TRUE
200	Willox, Ashlee Cunsolo; Stephenson, Eleanor; Allen, Jim; Bourque, Francois; Drossos, Alexander; Elgaroy, Sigmund; Kral, Michael J.; Mauro, Ian; Moses, Joshua; Pearce, Tristan; MacDonald, Joanna Petrasek; Wexler, Lisa	2015	Examining relationships between climate change and mental health in the Circumpolar North	REGIONAL ENVIRONMENTAL CHANGE	10.1007/s10113-014-0630-z	WoS	FALSE
201	Negrey JD, Langergraber KE.	2020	Corpse-directed play parenting by a sterile adult female chimpanzee	Primates	10.1007/s10329-019-00734-z	PubMed	FALSE
202	Negrey, Jacob D.; Langergraber, Kevin E.	2020	Corpse-directed play parenting by a sterile adult female chimpanzee	PRIMATES	10.1007/s10329-019-00734-z	WoS	TRUE
203	Miyamoto A, Hasegawa J, Hoshino O.	2012	Dynamic modulation of an orientation preference map by GABA responsible for age-related cognitive performance	Cogn Process	10.1007/s10339-012-0524-2	PubMed	FALSE
204	Johnson, Emmanuel Janagan; Boodram, Cheryl-Ann Sarita	2017	Health, well-being and quality of life of community members displaced after an industrial disaster in Trinidad	JOURNAL OF PUBLIC HEALTH-HEIDELBERG	10.1007/s10389-016-0759-y	WoS	FALSE
205	Wilson RL, Wilson GG, Usher K.	2015	Rural Mental Health Ecology: A Framework for Engaging with Mental Health Social Capital in Rural Communities	Ecohealth	10.1007/s10393-015-1037-0	PubMed	FALSE
206	Wilson, Rhonda L.; Wilson, G. Glenn; Usher, Kim	2015	Rural Mental Health Ecology: A Framework for Engaging with Mental Health Social Capital in Rural Communities	ECOHEALTH	10.1007/s10393-015-1037-0	WoS	TRUE
207	Eisenman D, McCaffrey S, Donatello I, Marshal G.	2015	An Ecosystems and Vulnerable Populations Perspective on Solastalgia and Psychological Distress After a Wildfire	Ecohealth	10.1007/s10393-015-1052-1	PubMed	FALSE
208	Eisenman, David; McCaffrey, Sarah; Donatello, Ian; Marshal, Grant	2015	An Ecosystems and Vulnerable Populations Perspective on Solastalgia and Psychological Distress After a Wildfire	ECOHEALTH	10.1007/s10393-015-1052-1	WoS	TRUE
209	Dounias E, Ichikawa M.	2017	Seasonal Bushmeat Hunger in the Congo Basin	Ecohealth	10.1007/s10393-017-1252-y	PubMed	FALSE
210	Dounias, Edmond; Ichikawa, Mitsuo	2017	Seasonal Bushmeat Hunger in the Congo Basin	ECOHEALTH	10.1007/s10393-017-1252-y	WoS	TRUE
211	Hanigan IC, Schirmer J, Niyonsenga T.	2018	Drought and Distress in Southeastern Australia	Ecohealth	10.1007/s10393-018-1339-0	PubMed	FALSE
212	Huth, Neil I.; Cocks, Brett; Dalgliesh, Neal; Poulton, Perry L.; Marinoni, Oswald; Garcia, Javier Navarro	2018	Farmers' perceptions of coexistence between agriculture and a large scale coal seam gas development	AGRICULTURE AND HUMAN VALUES	10.1007/s10460-017-9801-0	WoS	FALSE
213	Konda KA, Celentano DD, Kegeles S, Coates TJ, Caceres CF; NIMH Collaborative HIV/STD Prevention Trial Group.	2011	Latent class analysis of sexual risk patterns among esquineros (street corner men) a group of heterosexually identified, socially marginalized men in urban coastal Peru	AIDS Behav	10.1007/s10461-010-9772-2	PubMed	FALSE
214	Konda, Kelika A.; Celentano, David D.; Kegeles, Susan; Coates, Thomas J.; Caceres, Carlos F.	2011	Latent Class Analysis of Sexual Risk Patterns Among Esquineros (Street Corner Men) a Group of Heterosexually Identified, Socially Marginalized Men in Urban Coastal Peru	AIDS AND BEHAVIOR	10.1007/s10461-010-9772-2	WoS	TRUE
215	Tally S, Levack A, Sarkin AJ, Gilmer T, Groessl EJ.	2013	The impact of the San Diego wildfires on a general mental health population residing in evacuation areas	Adm Policy Ment Health	10.1007/s10488-012-0425-9	PubMed	FALSE
216	Tally, Steven; Levack, Ashley; Sarkin, Andrew J.; Gilmer, Todd; Groessl, Erik J.	2013	The Impact of the San Diego Wildfires on a General Mental Health Population Residing in Evacuation Areas	ADMINISTRATION AND POLICY IN MENTAL HEALTH AND MENTAL HEALTH SERVICES RESEARCH	10.1007/s10488-012-0425-9	WoS	TRUE
217	Lyon AR, Wasse JK, Ludwig K, Zachry M, Bruns EJ, Un??tzer J, McCauley E.	2016	The Contextualized Technology Adaptation Process (CTAP): Optimizing Health Information Technology to Improve Mental Health Systems	Adm Policy Ment Health	10.1007/s10488-015-0637-x	PubMed	FALSE
218	Lyon, Aaron R.; Wasse, Jessica Knaster; Ludwig, Kristy; Zachry, Mark; Bruns, Eric J.; Unuetzer, Juergen; McCauley, Elizabeth	2016	The Contextualized Technology Adaptation Process (CTAP): Optimizing Health Information Technology to Improve Mental Health Systems	ADMINISTRATION AND POLICY IN MENTAL HEALTH AND MENTAL HEALTH SERVICES RESEARCH	10.1007/s10488-015-0637-x	WoS	TRUE
219	Boswell JF, Constantino MJ, Kraus DR, Bugatti M, Oswald JM.	2016	The Expanding Relevance of Routinely Collected Outcome Data for Mental Health Care Decision Making	Adm Policy Ment Health	10.1007/s10488-015-0649-6	PubMed	FALSE
220	Boswell, James F.; Constantino, Michael J.; Kraus, David R.; Bugatti, Matteo; Oswald, Jennifer M.	2016	The Expanding Relevance of Routinely Collected Outcome Data for Mental Health Care Decision Making	ADMINISTRATION AND POLICY IN MENTAL HEALTH AND MENTAL HEALTH SERVICES RESEARCH	10.1007/s10488-015-0649-6	WoS	TRUE
221	Beidas RS, Stewart RE, Adams DR, Fernandez T, Lustbader S, Powell BJ, Aarons GA, Hoagwood KE, Evans AC, Hurford MO, Rubin R, Hadley T, Mandell DS, Barg FK.	2016	A Multi-Level Examination of Stakeholder Perspectives of Implementation of Evidence-Based Practices in a Large Urban Publicly-Funded Mental Health System	Adm Policy Ment Health	10.1007/s10488-015-0705-2	PubMed	FALSE
222	Beidas, Rinad S.; Stewart, Rebecca E.; Adams, Danielle R.; Fernandez, Tara; Lustbader, Susanna; Powell, Byron J.; Aarons, Gregory A.; Hoagwood, Kimberly E.; Evans, Arthur C.; Hurford, Matthew O.; Rubin, Ronnie; Hadley, Trevor; Mandell, David S.; Barg, Frances K.	2016	A Multi-Level Examination of Stakeholder Perspectives of Implementation of Evidence-Based Practices in a Large Urban Publicly-Funded Mental Health System	ADMINISTRATION AND POLICY IN MENTAL HEALTH AND MENTAL HEALTH SERVICES RESEARCH	10.1007/s10488-015-0705-2	WoS	TRUE
223	Morrow AS, Campos Vega AD, Zhao X, Liriano MM.	2020	Leveraging Machine Learning to Identify Predictors of Receiving Psychosocial Treatment for Attention Deficit/Hyperactivity Disorder	Adm Policy Ment Health	10.1007/s10488-020-01045-y	PubMed	FALSE
224	Morrow, Anne S.; Vega, Alexandro D. Campos; Zhao, Xin; Liriano, Michelle M.	2020	Leveraging Machine Learning to Identify Predictors of Receiving Psychosocial Treatment for Attention Deficit/Hyperactivity Disorder	ADMINISTRATION AND POLICY IN MENTAL HEALTH AND MENTAL HEALTH SERVICES RESEARCH	10.1007/s10488-020-01045-y	WoS	TRUE
225	Lyver, P. O'. B.; Timoti, P.; Jones, C. J.; Richardson, S. J.; Tahi, B. L.; Greenhalgh, S.	2017	An indigenous community-based monitoring system for assessing forest health in New Zealand	BIODIVERSITY AND CONSERVATION	10.1007/s10531-016-1142-6	WoS	FALSE
226	Smith NJ, Marcus RE, Sahakian BJ, Kapur N, Cox TM.	2010	Haematopoietic stem cell transplantation does not retard disease progression in the psycho-cognitive variant of late-onset metachromatic leukodystrophy	J Inherit Metab Dis	10.1007/s10545-010-9240-1	PubMed	FALSE
227	Smith, Nicholas J.; Marcus, Robert E.; Sahakian, Barbara J.; Kapur, Narinder; Cox, Timothy M.	2010	Haematopoietic stem cell transplantation does not retard disease progression in the psycho-cognitive variant of late-onset metachromatic leukodystrophy	JOURNAL OF INHERITED METABOLIC DISEASE	10.1007/s10545-010-9240-1	WoS	TRUE
228	Pobric G, Hulleman J, Lavidor M, Silipo G, Rohrig S, Dias E, Javitt DC.	2018	Seeing the World as it is: Mimicking Veridical Motion Perception in Schizophrenia Using Non-invasive Brain Stimulation in Healthy Participants	Brain Topogr	10.1007/s10548-018-0639-6	PubMed	FALSE
229	Pobric, Gorana; Hulleman, Johan; Lavidor, Michal; Silipo, Gail; Rohrig, Stephanie; Dias, Elisa; Javitt, Daniel C.	2018	Seeing the World as it is: Mimicking Veridical Motion Perception in Schizophrenia Using Non-invasive Brain Stimulation in Healthy Participants	BRAIN TOPOGRAPHY	10.1007/s10548-018-0639-6	WoS	TRUE
230	Mumtaz W, Malik AS.	2018	A Comparative Study of Different EEG Reference Choices for Diagnosing Unipolar Depression	Brain Topogr	10.1007/s10548-018-0651-x	PubMed	FALSE
231	Mumtaz, Wajid; Malik, Aamir Saeed	2018	A Comparative Study of Different EEG Reference Choices for Diagnosing Unipolar Depression	BRAIN TOPOGRAPHY	10.1007/s10548-018-0651-x	WoS	TRUE
232	Becker, Stephen P.	2010	Wilderness Therapy: Ethical Considerations for Mental Health Professionals	CHILD & YOUTH CARE FORUM	10.1007/s10566-009-9085-7	WoS	FALSE
233	Scott, David A.; Duerson, Lauren M.	2010	Continuing the Discussion: A Commentary on "Wilderness Therapy: Ethical Considerations for Mental Health Professionals"	CHILD & YOUTH CARE FORUM	10.1007/s10566-009-9090-x	WoS	FALSE
234	Sprague, Caryll M.; Kia-Keating, Maryam; Felix, Erika; Afifi, Tamara; Reyes, Gilbert; Afifi, Walid	2015	Youth Psychosocial Adjustment Following Wildfire: The Role of Family Resilience, Emotional Support, and Concrete Support	CHILD & YOUTH CARE FORUM	10.1007/s10566-014-9285-7	WoS	FALSE
235	Tucker, Anita R.; Bettmann, Joanna E.; Norton, Christine L.; Comart, Casey	2015	The Role of Transport Use in Adolescent Wilderness Treatment: Its Relationship to Readiness to Change and Outcomes	CHILD & YOUTH CARE FORUM	10.1007/s10566-015-9301-6	WoS	FALSE
236	Combs, Katie Massey; Hoag, Matthew J.; Roberts, Sean D.; Javorski, Stephen	2016	A Multilevel Model to Examine Adolescent Outcomes in Outdoor Behavioral Healthcare: The Parent Perspective	CHILD & YOUTH CARE FORUM	10.1007/s10566-015-9331-0	WoS	FALSE
237	Gillis, Harold L., Jr.; Speelman, Elizabeth; Linville, Noelle; Bailey, Emily; Kalle, Ashley; Oglesbee, Nathan; Sandlin, James; Thompson, Lauren; Jensen, Jennifer	2016	Meta-analysis of Treatment Outcomes Measured by the Y-OQ and Y-OQ-SR Comparing Wilderness and Non-wilderness Treatment Programs	CHILD & YOUTH CARE FORUM	10.1007/s10566-016-9360-3	WoS	FALSE
238	Paley B, Lester P, Mogil C.	2013	Family systems and ecological perspectives on the impact of deployment on military families	Clin Child Fam Psychol Rev	10.1007/s10567-013-0138-y	PubMed	FALSE
239	Paley, Blair; Lester, Patricia; Mogil, Catherine	2013	Family Systems and Ecological Perspectives on the Impact of Deployment on Military Families	CLINICAL CHILD AND FAMILY PSYCHOLOGY REVIEW	10.1007/s10567-013-0138-y	WoS	TRUE
240	Schleider JL, Mullarkey MC, Chacko A.	2020	Harnessing Wise Interventions to Advance the Potency and Reach of Youth Mental Health Services	Clin Child Fam Psychol Rev	10.1007/s10567-019-00301-4	PubMed	FALSE
241	Schleider, Jessica L.; Mullarkey, Michael C.; Chacko, Anil	2020	Harnessing Wise Interventions to Advance the Potency and Reach of Youth Mental Health Services	CLINICAL CHILD AND FAMILY PSYCHOLOGY REVIEW	10.1007/s10567-019-00301-4	WoS	TRUE
242	Chen, Keng; Mi, Ya-Jing; Ma, Yue; Fu, Hua-Lin; Jin, Wei-Lin	2011	The Mental Retardation Associated Protein, srGAP3 Negatively Regulates VPA-Induced Neuronal Differentiation of Neuro2A Cells	CELLULAR AND MOLECULAR NEUROBIOLOGY	10.1007/s10571-011-9664-7	WoS	FALSE
243	Watkiss, Paul; Hunt, Alistair	2012	Projection of economic impacts of climate change in sectors of Europe based on bottom up analysis: human health	CLIMATIC CHANGE	10.1007/s10584-011-0342-z	WoS	FALSE
244	Willox, Ashlee Cunsolo; Harper, Sherilee L.; Ford, James D.; Edge, Victoria L.; Landman, Karen; Houle, Karen; Blake, Sarah; Wolfrey, Charlotte	2013	Climate change and mental health: an exploratory case study from Rigolet, Nunatsiavut, Canada	CLIMATIC CHANGE	10.1007/s10584-013-0875-4	WoS	FALSE
245	Dannenberg, Andrew L.; Frumkin, Howard; Hess, Jeremy J.; Ebi, Kristie L.	2019	Managed retreat as a strategy for climate change adaptation in small communities: public health implications	CLIMATIC CHANGE	10.1007/s10584-019-02382-0	WoS	FALSE
246	Hannes K, Pieters G, Goedhuys J, Aertgeerts B.	2010	Exploring barriers to the implementation of evidence-based practice in psychiatry to inform health policy: a focus group based study	Community Ment Health J	10.1007/s10597-009-9260-1	PubMed	FALSE
247	Hannes, Karin; Pieters, Guido; Goedhuys, Jo; Aertgeerts, Bert	2010	Exploring Barriers to the Implementation of Evidence-Based Practice in Psychiatry to Inform Health Policy: A Focus Group Based Study	COMMUNITY MENTAL HEALTH JOURNAL	10.1007/s10597-009-9260-1	WoS	TRUE
248	Topor A, Andersson G, B??low P, Stefansson CG, Denhov A.	2016	After the Asylum? The New Institutional Landscape	Community Ment Health J	10.1007/s10597-015-9928-7	PubMed	FALSE
249	Topor, Alain; Andersson, Gunnel; Bulow, Per; Stefansson, Claes-Goran; Denhov, Anne	2016	After the Asylum? The New Institutional Landscape	COMMUNITY MENTAL HEALTH JOURNAL	10.1007/s10597-015-9928-7	WoS	TRUE
250	King RV, Polatin PB, Hogan D, Downs DL, North CS.	2016	Needs Assessment of Hurricane Katrina Evacuees Residing Temporarily in Dallas	Community Ment Health J	10.1007/s10597-015-9938-5	PubMed	FALSE
251	King, Richard V.; Polatin, Peter B.; Hogan, David; Downs, Dana L.; North, Carol S.	2016	Needs Assessment of Hurricane Katrina Evacuees Residing Temporarily in Dallas	COMMUNITY MENTAL HEALTH JOURNAL	10.1007/s10597-015-9938-5	WoS	TRUE
252	Hashoul-Andary, Raneen; Assayag-Nitzan, Yaara; Yuval, Kim; Aderka, Idan M.; Litz, Brett; Bernstein, Amit	2016	A Longitudinal Study of Emotional Distress Intolerance and Psychopathology Following Exposure to a Potentially Traumatic Event in a Community Sample	COGNITIVE THERAPY AND RESEARCH	10.1007/s10608-015-9730-4	WoS	FALSE
253	Raymen, Thomas; Smith, Oliver	2019	Deviant Leisure: A Critical Criminological Perspective for the Twenty-First Century	CRITICAL CRIMINOLOGY	10.1007/s10612-019-09435-x	WoS	FALSE
254	Norton, Christine Lynn	2010	Into the Wilderness-A Case Study: The Psychodynamics of Adolescent Depression and the Need for a Holistic Intervention	CLINICAL SOCIAL WORK JOURNAL	10.1007/s10615-009-0205-5	WoS	FALSE
255	Bennett, John L.; Douglass, Katie E.	2013	Growing Pains: An Eriksonian View of the Arc of Presenting Concerns in an LGBT Community Mental Health Center	CLINICAL SOCIAL WORK JOURNAL	10.1007/s10615-013-0442-5	WoS	FALSE
256	Butters, Robert P.; Droubay, Brian A.; Seawright, Jessica L.; Tollefson, Derrik R.; Lundahl, Brad; Whitaker, Lauren	2020	Intimate Partner Violence Perpetrator Treatment: Tailoring Interventions to Individual Needs	CLINICAL SOCIAL WORK JOURNAL	10.1007/s10615-020-00763-y	WoS	FALSE
257	Wang S, Jiang J, Zhou Y, Li J, Zhao D, Lin S.	2020	Climate-change information, health-risk perception and residents' environmental complaint behavior: an empirical study in China	Environ Geochem Health	10.1007/s10653-018-0235-4	PubMed	FALSE
258	Wang, Shanyong; Jiang, Jingjing; Zhou, Yu; Li, Jun; Zhao, Dingtao; Lin, Shoufu	2020	Climate-change information, health-risk perception and residents' environmental complaint behavior: an empirical study in China	ENVIRONMENTAL GEOCHEMISTRY AND HEALTH	10.1007/s10653-018-0235-4	WoS	TRUE
259	Al-Mutairi NZ, Al-Attar MA, Al-Rukaibi FS.	2011	Traffic-generated noise pollution: exposure of road users and populations in Metropolitan Kuwait	Environ Monit Assess	10.1007/s10661-011-1906-0	PubMed	FALSE
260	Al-Mutairi, N. Z.; Al-Attar, M. A.; Al-Rukaibi, F. S.	2011	Traffic-generated noise pollution: exposure of road users and populations in Metropolitan Kuwait	ENVIRONMENTAL MONITORING AND ASSESSMENT	10.1007/s10661-011-1906-0	WoS	TRUE
261	Liang J, Wu HB, Wang XX.	2019	Distribution characteristics and health risk assessment of heavy metals and PAHs in the soils of green spaces in Shanghai, China	Environ Monit Assess	10.1007/s10661-019-7476-2	PubMed	FALSE
262	Liang, Jing; Wu, Hai B.; Wang, Xing X.	2019	Distribution characteristics and health risk assessment of heavy metals and PAHs in the soils of green spaces in Shanghai, China	ENVIRONMENTAL MONITORING AND ASSESSMENT	10.1007/s10661-019-7476-2	WoS	TRUE
263	Jing, Xiaoli; Ghosh, Ratna; Sun, Zhaohui; Liu, Qiang	2020	Mapping global research related to international students: a scientometric review	HIGHER EDUCATION	10.1007/s10734-019-00489-y	WoS	FALSE
264	Boulanger-Lapointe, Noemie; Gerin-Lajoie, Jose; Collier, Laura Siegwart; Desrosiers, Sarah; Spiech, Carmen; Henry, Gregory H. R.; Hermanutz, Luise; Levesque, Esther; Cuerrier, Alain	2019	Berry Plants and Berry Picking in Inuit Nunangat: Traditions in a Changing Socio-Ecological Landscape	HUMAN ECOLOGY	10.1007/s10745-018-0044-5	WoS	FALSE
265	Zeller M, Yuval K, Nitzan-Assayag Y, Bernstein A.	2015	Self-compassion in recovery following potentially traumatic stress: longitudinal study of at-risk youth	J Abnorm Child Psychol	10.1007/s10802-014-9937-y	PubMed	FALSE
266	Zeller, Mordechai; Yuval, Kim; Nitzan-Assayag, Yaara; Bernstein, Amit	2015	Self-Compassion in Recovery Following Potentially Traumatic Stress: Longitudinal Study of At-Risk Youth	JOURNAL OF ABNORMAL CHILD PSYCHOLOGY	10.1007/s10802-014-9937-y	WoS	TRUE
267	Kuhn, Jocelyn; Ford, Katie; Dawalt, Leann Smith	2018	Brief Report: Mapping Systems of Support and Psychological Well-Being of Mothers of Adolescents with Autism Spectrum Disorders	JOURNAL OF AUTISM AND DEVELOPMENTAL DISORDERS	10.1007/s10803-017-3381-0	WoS	FALSE
268	Hu Q, Chandrasekhar T.	2020	Meeting the Mental Health Needs of College Students with ASD: A Survey of University and College Counseling Center Directors	J Autism Dev Disord	10.1007/s10803-020-04530-3	PubMed	FALSE
269	Hu, Qin; Chandrasekhar, Tara	2020	Meeting the Mental Health Needs of College Students with ASD: A Survey of University and College Counseling Center Directors	JOURNAL OF AUTISM AND DEVELOPMENTAL DISORDERS	10.1007/s10803-020-04530-3	WoS	TRUE
270	Lovasi GS, Eldred-Skemp N, Quinn JW, Chang HW, Rauh VA, Rundle A, Orjuela MA, Perera FP.	2014	Neighborhood Social Context and Individual Polycyclic Aromatic Hydrocarbon Exposures Associated with Child Cognitive Test Scores	J Child Fam Stud	10.1007/s10826-013-9731-4	PubMed	FALSE
271	Lovasi, Gina S.; Eldred-Skemp, Nicolia; Quinn, James W.; Chang, Hsin-wen; Rauh, Virginia A.; Rundle, Andrew; Orjuela, Manuela A.; Perera, Frederica P.	2014	Neighborhood Social Context and Individual Polycyclic Aromatic Hydrocarbon Exposures Associated with Child Cognitive Test Scores	JOURNAL OF CHILD AND FAMILY STUDIES	10.1007/s10826-013-9731-4	WoS	TRUE
272	Lewis, Krystal M.; Langley, Audra K.; Jones, Russell T.	2015	Impact of Coping Efficacy and Acculturation on Psychopathology in Adolescents Following a Wildfire	JOURNAL OF CHILD AND FAMILY STUDIES	10.1007/s10826-013-9838-7	WoS	FALSE
273	Bettmann, Joanna E.; Gillis, H. L.; Speelman, Elizabeth A.; Parry, Kimber J.; Case, Jonathan M.	2016	A Meta-analysis of Wilderness Therapy Outcomes for Private Pay Clients	JOURNAL OF CHILD AND FAMILY STUDIES	10.1007/s10826-016-0439-0	WoS	FALSE
274	Bettmann, Joanna E.; Tucker, Anita; Behrens, Ellen; Vanderloo, Mindy	2017	Changes in Late Adolescents and Young Adults' Attachment, Separation, and Mental Health During Wilderness Therapy	JOURNAL OF CHILD AND FAMILY STUDIES	10.1007/s10826-016-0577-4	WoS	FALSE
275	Lynch, Sean E.; Teich, Judith L.; Smith, Kelley E.	2017	Psychiatric Residential Treatment Centers for Children and Adolescents: Modeling Variation in Facility Definition Type	JOURNAL OF CHILD AND FAMILY STUDIES	10.1007/s10826-016-0640-1	WoS	FALSE
276	Jansson-Fr?�jmark M, Evander J, Alfonsson S.	2019	Are sleep hygiene practices related to the incidence, persistence and remission of insomnia? Findings from a prospective community study	J Behav Med	10.1007/s10865-018-9949-0	PubMed	FALSE
277	Jansson-Frojmark, Markus; Evander, Jonas; Alfonsson, Sven	2019	Are sleep hygiene practices related to the incidence, persistence and remission of insomnia? Findings from a prospective community study	JOURNAL OF BEHAVIORAL MEDICINE	10.1007/s10865-018-9949-0	WoS	TRUE
278	Fillmore EP, Ramirez M, Roth L, Robertson M, Atchison CG, Peek-Asa C.	2011	After the waters receded: a qualitative study of university officials' disaster experiences during the Great Iowa Flood of 2008	J Community Health	10.1007/s10900-010-9312-z	PubMed	FALSE
279	Fillmore, Erin P.; Ramirez, Marizen; Roth, Lisa; Robertson, McKaylee; Atchison, Christopher G.; Peek-Asa, Corinne	2011	After the Waters Receded: A Qualitative Study of University Official's Disaster Experiences During the Great Iowa Flood of 2008	JOURNAL OF COMMUNITY HEALTH	10.1007/s10900-010-9312-z	WoS	TRUE
280	Moghaddam JF, Momper SL, Fong T.	2013	Discrimination and participation in traditional healing for American Indians and Alaska Natives	J Community Health	10.1007/s10900-013-9721-x	PubMed	FALSE
281	Putrik P, de Vries NK, Mujakovic S, van Amelsvoort L, Kant I, Kunst AE, van Oers H, Jansen M.	2015	Living environment matters: relationships between neighborhood characteristics and health of the residents in a Dutch municipality	J Community Health	10.1007/s10900-014-9894-y	PubMed	FALSE
282	Del Brutto OH, Mera RM, Gillman J, Zambrano M, Ha JE.	2016	Oily Fish Intake and Cognitive Performance in Community-Dwelling Older Adults: The Atahualpa Project	J Community Health	10.1007/s10900-015-0070-9	PubMed	FALSE
283	Sansom G, Parras J, Parras A, Nieto Y, Arellano Y, Berke P, McDonald T, Shipp E, Horney JA.	2017	The Impacts of Exposure to Environmental Risk on Physical and Mental Health in a Small Geographic Community in Houston, TX	J Community Health	10.1007/s10900-017-0322-y	PubMed	FALSE
284	Sansom, Garett; Parras, Juan; Parras, Ana; Nieto, Yudith; Arellano, Yvette; Berke, Philip; McDonald, Thomas; Shipp, Eva; Horney, Jennifer A.	2017	The Impacts of Exposure to Environmental Risk on Physical and Mental Health in a Small Geographic Community in Houston, TX	JOURNAL OF COMMUNITY HEALTH	10.1007/s10900-017-0322-y	WoS	TRUE
285	Mannix TR, Austin SD, Baayd JL, Simonsen SE.	2018	A Community Needs Assessment of Urban Utah American Indians and Alaska Natives	J Community Health	10.1007/s10900-018-0542-9	PubMed	FALSE
286	Mannix, Tazlina R.; Austin, Sharon D.; Baayd, Jami L.; Simonsen, Sara E.	2018	A Community Needs Assessment of Urban Utah American Indians and Alaska Natives	JOURNAL OF COMMUNITY HEALTH	10.1007/s10900-018-0542-9	WoS	TRUE
287	Karaye IM, Ross AD, Horney JA.	2020	Self-Rated Mental and Physical Health of U.S. Gulf Coast Residents	J Community Health	10.1007/s10900-019-00779-7	PubMed	FALSE
288	Collins TW, Jimenez AM, Grineski SE.	2013	Hispanic health disparities after a flood disaster: results of a population-based survey of individuals experiencing home site damage in El Paso (Texas, USA)	J Immigr Minor Health	10.1007/s10903-012-9626-2	PubMed	FALSE
289	Collins, Timothy W.; Jimenez, Anthony M.; Grineski, Sara E.	2013	Hispanic Health Disparities After a Flood Disaster: Results of a Population-Based Survey of Individuals Experiencing Home Site Damage in El Paso (Texas, USA)	JOURNAL OF IMMIGRANT AND MINORITY HEALTH	10.1007/s10903-012-9626-2	WoS	TRUE
290	van der Boor CF, White R.	2020	Barriers to Accessing and Negotiating Mental Health Services in Asylum Seeking and Refugee Populations: The Application of the Candidacy Framework	J Immigr Minor Health	10.1007/s10903-019-00929-y	PubMed	FALSE
291	van der Boor, Catharina F.; White, Ross	2020	Barriers to Accessing and Negotiating Mental Health Services in Asylum Seeking and Refugee Populations: The Application of the Candidacy Framework	JOURNAL OF IMMIGRANT AND MINORITY HEALTH	10.1007/s10903-019-00929-y	WoS	TRUE
292	Kalton A, Falconer E, Docherty J, Alevras D, Brann D, Johnson K.	2016	Multi-Agent-Based Simulation of a Complex Ecosystem of Mental Health Care	J Med Syst	10.1007/s10916-015-0374-4	PubMed	FALSE
293	Kalton, Alan; Falconer, Erin; Docherty, John; Alevras, Dimitris; Brann, David; Johnson, Kyle	2016	Multi-Agent-Based Simulation of a Complex Ecosystem of Mental Health Care	JOURNAL OF MEDICAL SYSTEMS	10.1007/s10916-015-0374-4	WoS	TRUE
294	Srividya M, Mohanavalli S, Bhalaji N.	2018	Behavioral Modeling for Mental Health using Machine Learning Algorithms	J Med Syst	10.1007/s10916-018-0934-5	PubMed	FALSE
295	Srividya, M.; Mohanavalli, S.; Bhalaji, N.	2018	Behavioral Modeling for Mental Health using Machine Learning Algorithms	JOURNAL OF MEDICAL SYSTEMS	10.1007/s10916-018-0934-5	WoS	TRUE
296	Mahato S, Paul S.	2019	Classification of Depression Patients and Normal Subjects Based on Electroencephalogram (EEG) Signal Using Alpha Power and Theta Asymmetry	J Med Syst	10.1007/s10916-019-1486-z	PubMed	FALSE
297	Mahato, Shalini; Paul, Sanchita	2020	Classification of Depression Patients and Normal Subjects Based on Electroencephalogram (EEG) Signal Using Alpha Power and Theta Asymmetry	JOURNAL OF MEDICAL SYSTEMS	10.1007/s10916-019-1486-z	WoS	TRUE
298	Smith PM, Black O, Keegel T, Collie A.	2014	Are the predictors of work absence following a work-related injury similar for musculoskeletal and mental health claims?	J Occup Rehabil	10.1007/s10926-013-9455-8	PubMed	FALSE
299	Smith, Peter M.; Black, Oliver; Keegel, Tessa; Collie, Alex	2014	Are the Predictors of Work Absence Following a Work-Related Injury Similar for Musculoskeletal and Mental Health Claims?	JOURNAL OF OCCUPATIONAL REHABILITATION	10.1007/s10926-013-9455-8	WoS	TRUE
300	van Hoffen MFA, Norder G, Twisk JWR, Roelen CAM.	2020	Development of Prediction Models for Sickness Absence Due to Mental Disorders in the General Working Population	J Occup Rehabil	10.1007/s10926-019-09852-3	PubMed	FALSE
301	Baneshi MR, Haghdoost AA, Zolala F, Nakhaee N, Jalali M, Tabrizi R, Akbari M.	2017	Can Religious Beliefs be a Protective Factor for Suicidal Behavior? A Decision Tree Analysis in a Mid-Sized City in Iran, 2013	J Relig Health	10.1007/s10943-016-0215-x	PubMed	FALSE
302	Baneshi, Mohammad Reza; Haghdoost, Ali Akbar; Zolala, Farzaneh; Nakhaee, Nouzar; Jalali, Maryam; Tabrizi, Reza; Akbari, Maryam	2017	Can Religious Beliefs be a Protective Factor for Suicidal Behavior? A Decision Tree Analysis in a Mid-Sized City in Iran, 2013	JOURNAL OF RELIGION & HEALTH	10.1007/s10943-016-0215-x	WoS	TRUE
303	Hearld KR, Badham A, Budhwani H.	2017	Statistical Effects of Religious Participation and Marriage on Substance Use and Abuse in Racial and Ethnic Minorities	J Relig Health	10.1007/s10943-016-0330-8	PubMed	FALSE
304	Yu CH, Trier H, Slama M.	2019	A Data Mining and Data Visualization Approach to Examine the Interrelationships Between Life Satisfaction, Secularization and Religiosity	J Relig Health	10.1007/s10943-018-0737-5	PubMed	FALSE
305	Houghton S, Lawrence D, Hunter SC, Rosenberg M, Zadow C, Wood L, Shilton T.	2018	Reciprocal Relationships between Trajectories of Depressive Symptoms and Screen Media Use during Adolescence	J Youth Adolesc	10.1007/s10964-018-0901-y	PubMed	FALSE
306	Houghton, Stephen; Lawrence, David; Hunter, Simon C.; Rosenberg, Michael; Zadow, Corinne; Wood, Lisa; Shilton, Trevor	2018	Reciprocal Relationships between Trajectories of Depressive Symptoms and Screen Media Use during Adolescence	JOURNAL OF YOUTH AND ADOLESCENCE	10.1007/s10964-018-0901-y	WoS	TRUE
307	Granvik Saminathen M, Plenty S, Modin B.	2020	The Role of Academic Achievement in the Relationship between School Ethos and Adolescent Distress and Aggression: A Study of Ninth Grade Students in the Segregated School Landscape of Stockholm	J Youth Adolesc	10.1007/s10964-020-01199-w	PubMed	FALSE
308	Oldani, Michael	2014	Deep Pharma: Psychiatry, Anthropology, and Pharmaceutical Detox	CULTURE MEDICINE AND PSYCHIATRY	10.1007/s11013-014-9369-8	WoS	FALSE
309	Huang, Hsuan-Ying	2018	Untamed Jianghu or Emerging Profession: Diagnosing the Psycho-Boom amid China's Mental Health Legislation	CULTURE MEDICINE AND PSYCHIATRY	10.1007/s11013-017-9553-8	WoS	FALSE
310	Henckes N.	2019	Schizophrenia Infrastructures: Local and Global Dynamics of Transformation in Psychiatric Diagnosis-Making in the Twentieth and Twenty-First Centuries	Cult Med Psychiatry	10.1007/s11013-019-09636-7	PubMed	FALSE
311	Henckes, Nicolas	2019	Schizophrenia Infrastructures: Local and Global Dynamics of Transformation in Psychiatric Diagnosis-Making in the Twentieth and Twenty-First Centuries	CULTURE MEDICINE AND PSYCHIATRY	10.1007/s11013-019-09636-7	WoS	TRUE
312	Read UM.	2019	Rights as Relationships: Collaborating with Faith Healers in Community Mental Health in Ghana	Cult Med Psychiatry	10.1007/s11013-019-09648-3	PubMed	FALSE
313	Chua JL.	2020	Medication by Proxy: The Devolution of Psychiatric Power and Shared Accountability to Psychopharmaceutical Use Among Soldiers in America's Post-9/11 Wars	Cult Med Psychiatry	10.1007/s11013-020-09673-7	PubMed	FALSE
314	Chua, Jocelyn Lim	2020	Medication by Proxy: The Devolution of Psychiatric Power and Shared Accountability to Psychopharmaceutical Use Among Soldiers in America's Post-9/11 Wars	CULTURE MEDICINE AND PSYCHIATRY	10.1007/s11013-020-09673-7	WoS	TRUE
315	Kaur, Pavleen; Kumar, Ravinder; Kumar, Munish	2019	A healthcare monitoring system using random forest and internet of things (IoT)	MULTIMEDIA TOOLS AND APPLICATIONS	10.1007/s11042-019-7327-8	WoS	FALSE
316	Abootalebi, Hassan	2018	Paranoia and its ensuing effects in Ken Kesey's One Flew over the Cuckoo's Nest	NEOHELICON	10.1007/s11059-017-0392-y	WoS	FALSE
317	Maqsood R, Stone TW.	2016	The Gut-Brain Axis, BDNF, NMDA and CNS Disorders	Neurochem Res	10.1007/s11064-016-2039-1	PubMed	FALSE
318	Khan, M. M. H.; Gruebner, Oliver; Kraemer, Alexander	2014	Is area affected by flood or stagnant water independently associated with poorer health outcomes in urban slums of Dhaka and adjacent rural areas?	NATURAL HAZARDS	10.1007/s11069-013-0829-1	WoS	FALSE
319	Bunce, Anna; Ford, James; Harper, Sherilee; Edge, Victoria	2016	Vulnerability and adaptive capacity of Inuit women to climate change: a case study from Iqaluit, Nunavut	NATURAL HAZARDS	10.1007/s11069-016-2398-6	WoS	FALSE
320	Stewart, Ronald E.; Betancourt, Daniel; Davies, James B.; Harford, Deborah; Klein, Yaheli; Lannigan, Robert; Mortsch, Linda; O'Connell, Erin; Tang, Kathy; Whitfield, Paul H.	2017	A multi-perspective examination of heat waves affecting Metro Vancouver: now into the future	NATURAL HAZARDS	10.1007/s11069-017-2793-7	WoS	FALSE
321	Seyedin, Hesam; HabibiSaravi, Reza; Sayfouri, Nasrin; Djenab, Vahid Hoseini; Hamedani, Fariba Ghasemi	2017	Psychological sequels of flood on residents of southeast Caspian region	NATURAL HAZARDS	10.1007/s11069-017-2926-z	WoS	FALSE
322	Mercer, Joyce Ann	2015	Pastoral Care with Children of War: A Community-Based Model of Trauma Healing in the Aftermath of Indonesia's Religious Conflicts	PASTORAL PSYCHOLOGY	10.1007/s11089-015-0654-4	WoS	FALSE
323	Osafo, Joseph	2016	Seeking Paths for Collaboration between Religious Leaders and Mental Health Professionals in Ghana	PASTORAL PSYCHOLOGY	10.1007/s11089-016-0703-7	WoS	FALSE
324	Barker, Gillian	2017	From stability to norm transformation: lessons about resilience, for development, from ecology	PHENOMENOLOGY AND THE COGNITIVE SCIENCES	10.1007/s11097-017-9527-x	WoS	FALSE
325	Wolsko, Christopher; Marino, Elizabeth	2016	Disasters, migrations, and the unintended consequences of urbanization: What's the harm in getting out of harm's way?	POPULATION AND ENVIRONMENT	10.1007/s11111-015-0248-1	WoS	FALSE
326	Xu, Ying; Wheeler, Sarah Ann; Zuo, Alec	2018	Will boys' mental health fare worse under a hotter climate in Australia?	POPULATION AND ENVIRONMENT	10.1007/s11111-018-0306-6	WoS	FALSE
327	Mohyuddin F, Mathai AJ, Weinberg P, Saeed SA.	2015	Career Paths and Trends: How Does One Become a Leader in Psychiatric Administration? Implications for Residency Training	Psychiatr Q	10.1007/s11126-015-9380-4	PubMed	FALSE
328	Mohyuddin, Farooq; Mathai, Ashwin Jacob; Weinberg, Pamela; Saeed, Sy Atezaz	2015	Career Paths and Trends: How Does One Become a Leader in Psychiatric Administration? Implications for Residency Training	PSYCHIATRIC QUARTERLY	10.1007/s11126-015-9380-4	WoS	TRUE
329	Craciun, Mariana	2017	Time, Knowledge, and Power in Psychotherapy: A Comparison of Psychodynamic and Cognitive Behavioral Practices	QUALITATIVE SOCIOLOGY	10.1007/s11133-017-9355-x	WoS	FALSE
330	Sprangers MA, Bartels M, Veenhoven R, Baas F, Martin NG, Mosing M, Movsas B, Ropka ME, Shinozaki G, Swaab D; GENEQOL Consortium.	2010	Which patient will feel down, which will be happy? The need to study the genetic disposition of emotional states	Qual Life Res	10.1007/s11136-010-9652-2	PubMed	FALSE
331	Sprangers, Mirjam A. G.; Bartels, Meike; Veenhoven, Ruut; Baas, Frank; Martin, Nicholas G.; Mosing, Miriam; Movsas, Benjamin; Ropka, Mary E.; Shinozaki, Gen; Swaab, Dick	2010	Which patient will feel down, which will be happy? The need to study the genetic disposition of emotional states	QUALITY OF LIFE RESEARCH	10.1007/s11136-010-9652-2	WoS	TRUE
332	Jafflin K, Pfeiffer C, Bergman MM.	2019	Effects of self-esteem and stress on self-assessed health: a Swiss study from adolescence to early adulthood	Qual Life Res	10.1007/s11136-018-2059-1	PubMed	FALSE
333	Gomez, Jennifer M.; Gobin, Robyn L.	2020	Black Women and Girls & #MeToo: Rape, Cultural Betrayal, & Healing	SEX ROLES	10.1007/s11199-019-01040-0	WoS	FALSE
334	Mendes, Salome; Severo, Milton; Lopes, Carla	2012	Comparison of Modes of Administration and Response Options in the Assessment of Subjective Health Using the First Question of SF-36	SOCIAL INDICATORS RESEARCH	10.1007/s11205-011-9849-y	WoS	FALSE
335	Crabtree, Andrew	2013	Questioning Psychosocial Resilience After Flooding and the Consequences for Disaster Risk Reduction	SOCIAL INDICATORS RESEARCH	10.1007/s11205-013-0297-8	WoS	FALSE
336	Walters, A. Brooke; Drescher, Christopher F.; Baczwaski, Brandy J.; Aiena, Bethany J.; Darden, Marie C.; Johnson, Laura R.; Buchanan, Erin M.; Schulenberg, Stefan E.	2014	Getting Active in the Gulf: Environmental Attitudes and Action Following Two Mississippi Coastal Disasters	SOCIAL INDICATORS RESEARCH	10.1007/s11205-013-0428-2	WoS	FALSE
337	Yu, Wei-hsin; Chiu, Chi-Tsun	2016	Growing Pains: Changes in Psychological Well-Being in Urban China	SOCIAL INDICATORS RESEARCH	10.1007/s11205-015-1166-4	WoS	FALSE
338	Pickett, Steward T. A.; Buckley, Geoffrey L.; Kaushal, Sujay S.; Williams, Yvette	2011	Social-ecological science in the humane metropolis	URBAN ECOSYSTEMS	10.1007/s11252-011-0166-7	WoS	FALSE
339	Blouin, Daniel; Pellerin, Stephanie; Poulin, Monique	2019	Increase in non-native species richness leads to biotic homogenization in vacant lots of a highly urbanized landscape	URBAN ECOSYSTEMS	10.1007/s11252-019-00863-9	WoS	FALSE
340	Mullins, David; Acheson, Nicholas	2014	Competing Drivers of Hybridity: Third-Sector Housing Organisations in Northern Ireland	VOLUNTAS	10.1007/s11266-013-9423-0	WoS	FALSE
341	Acharjee A, Prentice P, Acerini C, Smith J, Hughes IA, Ong K, Griffin JL, Dunger D, Koulman A.	2017	The translation of lipid profiles to nutritional biomarkers in the study of infant metabolism	Metabolomics	10.1007/s11306-017-1166-2	PubMed	FALSE
342	Acharjee, Animesh; Prentice, Philippa; Acerini, Carlo; Smith, James; Hughes, Ieuan A.; Ong, Ken; Griffin, Julian L.; Dunger, David; Koulman, Albert	2017	The translation of lipid profiles to nutritional biomarkers in the study of infant metabolism	METABOLOMICS	10.1007/s11306-017-1166-2	WoS	TRUE
343	Shiue I.	2015	Neighborhood epidemiological monitoring and adult mental health: European Quality of Life Survey, 2007-2012	Environ Sci Pollut Res Int	10.1007/s11356-014-3818-3	PubMed	FALSE
344	Shiue I.	2016	People with dyslexia and?�heart, chest, skin, digestive, musculoskeletal, vision, learning, speech and mental disorders were more dissatisfied with neighbourhoods: Scottish Household Survey, 2007-2008	Environ Sci Pollut Res Int	10.1007/s11356-016-7585-1	PubMed	FALSE
345	Shiue, Ivy	2016	People with dyslexia and heart, chest, skin, digestive, musculoskeletal, vision, learning, speech and mental disorders were more dissatisfied with neighbourhoods: Scottish Household Survey, 2007-2008	ENVIRONMENTAL SCIENCE AND POLLUTION RESEARCH	10.1007/s11356-016-7585-1	WoS	TRUE
346	Ramakreshnan L, Aghamohammadi N, Fong CS, Bulgiba A, Zaki RA, Wong LP, Sulaiman NM.	2018	Haze and health impacts in ASEAN countries: a systematic review	Environ Sci Pollut Res Int	10.1007/s11356-017-0860-y	PubMed	FALSE
347	Giovanis E, Ozdamar O.	2018	Health status, mental health and air quality: evidence from pensioners in Europe	Environ Sci Pollut Res Int	10.1007/s11356-018-1534-0	PubMed	FALSE
348	Giovanis, Eleftherios; Ozdamar, Oznur	2018	Health status, mental health and air quality: evidence from pensioners in Europe	ENVIRONMENTAL SCIENCE AND POLLUTION RESEARCH	10.1007/s11356-018-1534-0	WoS	TRUE
349	Sui G, Liu G, Jia L, Wang L, Yang G.	2018	The association between ambient air pollution exposure and mental health status in Chinese female college students: a cross-sectional study	Environ Sci Pollut Res Int	10.1007/s11356-018-2881-6	PubMed	FALSE
350	Sui, Guoyuan; Liu, Guangcong; Jia, Lianqun; Wang, Lie; Yang, Guanlin	2018	The association between ambient air pollution exposure and mental health status in Chinese female college students: a cross-sectional study	ENVIRONMENTAL SCIENCE AND POLLUTION RESEARCH	10.1007/s11356-018-2881-6	WoS	TRUE
351	Gu H, Yan W, Elahi E, Cao Y.	2020	Air pollution risks human mental health: an implication of two-stages least squares estimation of interaction effects	Environ Sci Pollut Res Int	10.1007/s11356-019-06612-x	PubMed	FALSE
352	Gu, Hejun; Yan, Weiran; Elahi, Ehsan; Cao, Yuxia	2020	Air pollution risks human mental health: an implication of two-stages least squares estimation of interaction effects	ENVIRONMENTAL SCIENCE AND POLLUTION RESEARCH	10.1007/s11356-019-06612-x	WoS	TRUE
353	Cucurachi S, Heijungs R, Ohlau K.	2012	Towards a general framework for including noise impacts in LCA	Int J Life Cycle Assess	10.1007/s11367-011-0377-4	PubMed	FALSE
354	Nguyen D.	2011	Acculturation and perceived mental health need among older Asian immigrants	J Behav Health Serv Res	10.1007/s11414-011-9245-z	PubMed	FALSE
355	Duy Nguyen	2011	Acculturation and Perceived Mental Health Need Among Older Asian Immigrants	JOURNAL OF BEHAVIORAL HEALTH SERVICES & RESEARCH	10.1007/s11414-011-9245-z	WoS	TRUE
356	Shultz JM, Walsh L, Garfin DR, Wilson FE, Neria Y.	2015	The 2010 Deepwater Horizon oil spill: the trauma signature of an ecological disaster	J Behav Health Serv Res	10.1007/s11414-014-9398-7	PubMed	FALSE
357	Shultz, James M.; Walsh, Lauren; Garfin, Dana Rose; Wilson, Fiona E.; Neria, Yuval	2015	The 2010 Deepwater Horizon Oil Spill: The Trauma Signature of an Ecological Disaster	JOURNAL OF BEHAVIORAL HEALTH SERVICES & RESEARCH	10.1007/s11414-014-9398-7	WoS	TRUE
358	Cuellar AE, Cheema J.	2014	Health care reform, behavioral health, and the criminal justice population	J Behav Health Serv Res	10.1007/s11414-014-9404-0	PubMed	FALSE
359	Cuellar, Alison Evans; Cheema, Jehanzeb	2014	Health Care Reform, Behavioral Health, and the Criminal Justice Population	JOURNAL OF BEHAVIORAL HEALTH SERVICES & RESEARCH	10.1007/s11414-014-9404-0	WoS	TRUE
360	Kim H, Tracy EM, Biegel DE, Min MO, Munson MR.	2015	The Effects of Organizational Culture on Mental Health Service Engagement of Transition Age Youth	J Behav Health Serv Res	10.1007/s11414-014-9406-y	PubMed	FALSE
361	Kim, HyunSoo; Tracy, Elizabeth M.; Biegel, David E.; Min, Meeyoung O.; Munson, Michelle R.	2015	The Effects of Organizational Culture on Mental Health Service Engagement of Transition Age Youth	JOURNAL OF BEHAVIORAL HEALTH SERVICES & RESEARCH	10.1007/s11414-014-9406-y	WoS	TRUE
362	Gould DW, Teich JL, Pemberton MR, Pierannunzi C, Larson S.	2015	Behavioral health in the gulf coast region following the Deepwater Horizon oil spill: findings from two federal surveys	J Behav Health Serv Res	10.1007/s11414-014-9441-8	PubMed	FALSE
363	Gould, Deborah W.; Teich, Judith L.; Pemberton, Michael R.; Pierannunzi, Carol; Larson, Sharon	2015	Behavioral Health in the Gulf Coast Region Following the Deepwater Horizon Oil Spill: Findings from Two Federal Surveys	JOURNAL OF BEHAVIORAL HEALTH SERVICES & RESEARCH	10.1007/s11414-014-9441-8	WoS	TRUE
364	Lambert D, Gale J, Hartley D, Croll Z, Hansen A.	2016	Understanding the Business Case for Telemental Health in Rural Communities	J Behav Health Serv Res	10.1007/s11414-015-9490-7	PubMed	FALSE
365	Lambert, David; Gale, John; Hartley, David; Croll, Zachariah; Hansen, Anush	2016	Understanding the Business Case for Telemental Health in Rural Communities	JOURNAL OF BEHAVIORAL HEALTH SERVICES & RESEARCH	10.1007/s11414-015-9490-7	WoS	TRUE
366	Skale G, Perez H, Williams ME.	2020	Factors Influencing Implementation of Evidence-Based Mental Health Interventions for Infants and Young Children	J Behav Health Serv Res	10.1007/s11414-020-09694-5	PubMed	FALSE
367	Skale, Genevieve; Perez, Hannah; Williams, Marian E.	2020	Factors Influencing Implementation of Evidence-Based Mental Health Interventions for Infants and Young Children	JOURNAL OF BEHAVIORAL HEALTH SERVICES & RESEARCH	10.1007/s11414-020-09694-5	WoS	TRUE
368	Fang BinXing; Guo YunChuan; Zhou Yuan	2010	Information content security on the Internet: the control model and its evaluation	SCIENCE CHINA-INFORMATION SCIENCES	10.1007/s11432-010-0014-z	WoS	FALSE
369	Van Hout, Marie Claire	2017	The Dynamic Landscape of Novel Psychoactive Substance (NPS) Use in Ireland: Results from an Expert Consultation	INTERNATIONAL JOURNAL OF MENTAL HEALTH AND ADDICTION	10.1007/s11469-016-9714-y	WoS	FALSE
370	Danhoundo, Georges; Khanlou, Nazilla	2017	Family Ties and Mental Health of Orphans in Ouagadougou (Burkina Faso). Does the Gender of the Dead Parent Matter?	INTERNATIONAL JOURNAL OF MENTAL HEALTH AND ADDICTION	10.1007/s11469-016-9717-8	WoS	FALSE
371	Hirsch, Jameson K.; Smalley, K. Bryant; Selby-Nelson, Emily M.; Hamel-Lambert, Jane M.; Rosmann, Michael R.; Barnes, Tammy A.; Abrahamson, Daniel; Meit, Scott S.; GreyWolf, Iva; Beckmann, Sarah; LaFromboise, Teresa	2018	Psychosocial Impact of Fracking: a Review of the Literature on the Mental Health Consequences of Hydraulic Fracturing	INTERNATIONAL JOURNAL OF MENTAL HEALTH AND ADDICTION	10.1007/s11469-017-9792-5	WoS	FALSE
372	Kotera, Yasuhiro; Richardson, Miles; Sheffield, David	2020	Effects of Shinrin-Yoku (Forest Bathing) and Nature Therapy on Mental Health: a Systematic Review and Meta-analysis	INTERNATIONAL JOURNAL OF MENTAL HEALTH AND ADDICTION	10.1007/s11469-020-00363-4	WoS	FALSE
373	Smith TE, Sederer LI.	2010	Changing the landscape of an urban public mental health system: the 2008 New York State/New York City Mental Health-Criminal Justice Review Panel	J Urban Health	10.1007/s11524-009-9407-y	PubMed	FALSE
374	Smith, Thomas E.; Sederer, Lloyd I.	2010	Changing the Landscape of an Urban Public Mental Health System: The 2008 New York State/New York City Mental Health-Criminal Justice Review Panel	JOURNAL OF URBAN HEALTH-BULLETIN OF THE NEW YORK ACADEMY OF MEDICINE	10.1007/s11524-009-9407-y	WoS	TRUE
375	Miles, Rebecca; Coutts, Christopher; Mohamadi, Asal	2012	Neighborhood Urban Form, Social Environment, and Depression	JOURNAL OF URBAN HEALTH-BULLETIN OF THE NEW YORK ACADEMY OF MEDICINE	10.1007/s11524-011-9621-2	WoS	FALSE
376	Strong C, Juon HS, Ensminger ME.	2014	Long-term effects of adolescent smoking on depression and socioeconomic status in adulthood in an urban African American cohort	J Urban Health	10.1007/s11524-013-9849-0	PubMed	FALSE
377	Strong, Carol; Juon, Hee-Soon; Ensminger, Margaret E.	2014	Long-term Effects of Adolescent Smoking on Depression and Socioeconomic Status in Adulthood in an Urban African American Cohort	JOURNAL OF URBAN HEALTH-BULLETIN OF THE NEW YORK ACADEMY OF MEDICINE	10.1007/s11524-013-9849-0	WoS	TRUE
378	Glick JL, Lopez A, Pollock M, Theall KP.	2019	"Housing Insecurity Seems to Almost Go Hand in Hand with Being Trans": Housing Stress among Transgender and Gender Non-conforming Individuals in New Orleans	J Urban Health	10.1007/s11524-019-00384-y	PubMed	FALSE
379	Glick, Jennifer L.; Lopez, Alex; Pollock, Miranda; Theall, Katherine P.	2019	Housing Insecurity Seems to Almost Go Hand in Hand with Being Trans: Housing Stress among Transgender and Gender Non-conforming Individuals in New Orleans	JOURNAL OF URBAN HEALTH-BULLETIN OF THE NEW YORK ACADEMY OF MEDICINE	10.1007/s11524-019-00384-y	WoS	TRUE
380	Lee, Ju-hyoung; Park, Ji-sook; Choi, Sunnam	2020	Environmental influence in the forested area toward human health: incorporating the ecological environment into art psychotherapy	JOURNAL OF MOUNTAIN SCIENCE	10.1007/s11629-019-5774-3	WoS	FALSE
381	Yin, Jiao; Cao, Jinli; Siuly, Siuly; Wang, Hua	2019	An Integrated MCI Detection Framework Based on Spectral-temporal Analysis	INTERNATIONAL JOURNAL OF AUTOMATION AND COMPUTING	10.1007/s11633-019-1197-4	WoS	FALSE
382	Sun Zhe; Zhan Dongsheng; Jin Fengjun	2019	Spatio-temporal Characteristics and Geographical Determinants of Air Quality in Cities at the Prefecture Level and Above in China	CHINESE GEOGRAPHICAL SCIENCE	10.1007/s11769-019-1031-5	WoS	FALSE
383	Wei Ye; Chen Zuoqi; Xiu Chunliang; Yu Bailang; Liu Hongxing	2019	Siting of Dark Sky Reserves in China Based on Multi-source Spatial Data and Multiple Criteria Evaluation Method	CHINESE GEOGRAPHICAL SCIENCE	10.1007/s11769-019-1079-2	WoS	FALSE
384	Kelly BD.	2020	"Dyspepsia," "seduction" and "violent hysteria": reports, reforms and the Irish asylums of the 1850s	Ir J Med Sci	10.1007/s11845-020-02274-8	PubMed	FALSE
385	Ieichalopoulos, Charalampos; Tzavara, Chara; Liodakis, Stylianos	2016	Intensive hog farming operations, health risks, and quality of life of nearby residents in east Mediterranean	AIR QUALITY ATMOSPHERE AND HEALTH	10.1007/s11869-015-0351-6	WoS	FALSE
386	Kolvir, Hojjatollah Rashid; Madadi, Aghil; Safarianzengir, Vahid; Sobhani, Behrouz	2020	Monitoring and analysis of the effects of atmospheric temperature and heat extreme of the environment on human health in Central Iran, located in southwest Asia	AIR QUALITY ATMOSPHERE AND HEALTH	10.1007/s11869-020-00843-5	WoS	FALSE
387	Callahan ML, Lim MM.	2018	Sensory Sensitivity in TBI: Implications for Chronic Disability	Curr Neurol Neurosci Rep	10.1007/s11910-018-0867-x	PubMed	FALSE
388	Callahan, Megan L.; Lim, Miranda M.	2018	Sensory Sensitivity in TBI: Implications for Chronic Disability	CURRENT NEUROLOGY AND NEUROSCIENCE REPORTS	10.1007/s11910-018-0867-x	WoS	TRUE
389	Burke SEL, Sanson AV, Van Hoorn J.	2018	The Psychological Effects of Climate Change on Children	Curr Psychiatry Rep	10.1007/s11920-018-0896-9	PubMed	FALSE
390	Burke, Susie E. L.; Sanson, Ann V.; Van Hoorn, Judith	2018	The Psychological Effects of Climate Change on Children	CURRENT PSYCHIATRY REPORTS	10.1007/s11920-018-0896-9	WoS	TRUE
391	Brickell CM.	2018	Diagnosis and Treatment of Borderline Personality Disorder in the College Mental Health Setting	Curr Psychiatry Rep	10.1007/s11920-018-0905-z	PubMed	FALSE
392	Brickell, Claire M.	2018	Diagnosis and Treatment of Borderline Personality Disorder in the College Mental Health Setting	CURRENT PSYCHIATRY REPORTS	10.1007/s11920-018-0905-z	WoS	TRUE
393	Collier S, Monette P, Hobbs K, Tabasky E, Forester BP, Vahia IV.	2018	Mapping Movement: Applying Motion Measurement Technologies to the Psychiatric Care of Older Adults	Curr Psychiatry Rep	10.1007/s11920-018-0921-z	PubMed	FALSE
394	Collier, Stephanie; Monette, Patrick; Hobbs, Katherine; Tabasky, Edward; Forester, Brent P.; Vahia, Ipsit V.	2018	Mapping Movement: Applying Motion Measurement Technologies to the Psychiatric Care of Older Adults	CURRENT PSYCHIATRY REPORTS	10.1007/s11920-018-0921-z	WoS	TRUE
395	Sussman N, DeJong SM.	2018	Ethical Considerations for Mental Health Clinicians Working with Adolescents in the Digital Age	Curr Psychiatry Rep	10.1007/s11920-018-0974-z	PubMed	FALSE
396	Sussman, Nicole; DeJong, Sandra M.	2018	Ethical Considerations for Mental Health Clinicians Working with Adolescents in the Digital Age	CURRENT PSYCHIATRY REPORTS	10.1007/s11920-018-0974-z	WoS	TRUE
397	M??ller A, Hase C, Pommnitz M, de Zwaan M.	2019	Depression and Suicide After Bariatric Surgery	Curr Psychiatry Rep	10.1007/s11920-019-1069-1	PubMed	FALSE
398	Mueller, Astrid; Hase, Carolin; Pommnitz, Melanie; de Zwaan, Martina	2019	Depression and Suicide After Bariatric Surgery	CURRENT PSYCHIATRY REPORTS	10.1007/s11920-019-1069-1	WoS	TRUE
399	Klein, Anke; Schroeder, Carolin; Heinemann, Axel; Pueschel, Klaus	2014	Homicide or suicide? Xylophagia: a possible explanation for extraordinary autopsy findings	FORENSIC SCIENCE MEDICINE AND PATHOLOGY	10.1007/s12024-014-9554-7	WoS	FALSE
400	Kim JH, Park BL, Pasaje CF, Bae JS, Park CS, Cha B, Kim BJ, Lee M, Choi WH, Shin TM, Choi IG, Hwang J, Koh I, Woo SI, Shin HD.	2012	Lack of associations of neuregulin 1 variations with schizophrenia and smooth pursuit eye movement abnormality in a Korean population	J Mol Neurosci	10.1007/s12031-011-9619-y	PubMed	FALSE
401	Firdaus, Ghuncha	2017	Built Environment and Health Outcomes: Identification of Contextual Risk Factors for Mental Well-being of Older Adults	AGEING INTERNATIONAL	10.1007/s12126-016-9276-0	WoS	FALSE
402	Allen, Priscilla D.; D'Elia, Christopher F.	2015	What Lies Beneath: the BP Oil Spill and the Need for New Response Models	CURRENT PSYCHOLOGY	10.1007/s12144-015-9367-1	WoS	FALSE
403	An, Jing; Wang, Siwei; Cheng, Mingwang; Li, Tan; Sheng, Liying; Bian, Shu; Ni, Xianlin; Yao, Jun; Fu, Changluan; An, Jinlong	2020	Mental health of urban residents in the developed cities of the Yangtze River Delta in China: Measurement with the mental composite scale from the WHOQOL-BREF	CURRENT PSYCHOLOGY	10.1007/s12144-019-0142-6	WoS	FALSE
404	Moreira, Helena; Vagos, Paula; Pereira, Joana; Fonseca, Ana; Canavarro, Maria Cristina; Rijo, Daniel	2020	Psychometric properties of the Portuguese version of the cognitive emotion regulation questionnaire-kids version (CERQ-kids) among a sample of children and adolescents exposed to wildfires	CURRENT PSYCHOLOGY	10.1007/s12144-020-00778-1	WoS	FALSE
405	Karjalainen E, Sarjala T, Raitio H.	2010	Promoting human health through forests: overview and major challenges	Environ Health Prev Med	10.1007/s12199-008-0069-2	PubMed	FALSE
406	Amin, Rizwana; Nadeem, Erum; Iqbal, Khizra; Asadullah, Muhammad Ali; Hussain, Bashir	2020	Support for Students Exposed to Trauma (SSET) Program: An Approach for Building Resilience and Social Support Among Flood-Impacted Children	SCHOOL MENTAL HEALTH	10.1007/s12310-020-09373-y	WoS	FALSE
407	Petruk C, Mathias J.	2020	The Myeloproliferative Neoplasm Landscape: A Patient's Eye View	Adv Ther	10.1007/s12325-020-01314-0	PubMed	FALSE
408	Petruk, Cheryl; Mathias, Jonathan	2020	The Myeloproliferative Neoplasm Landscape: A Patient's Eye View	ADVANCES IN THERAPY	10.1007/s12325-020-01314-0	WoS	TRUE
409	Herr RM, Loerbroks A, Bosch JA, Seegel M, Schneider M, Schmidt B.	2016	Associations of Organizational Justice with Tinnitus and the Mediating Role of Depressive Symptoms and Burnout-Findings from a Cross-Sectional Study	Int J Behav Med	10.1007/s12529-015-9505-z	PubMed	FALSE
410	Iliou, Theodoros; Konstantopoulou, Georgia; Ntekouli, Mandani; Lymperopoulou, Christina; Assimakopoulos, Konstantinos; Galiatsatos, Dimitrios; Anastassopoulos, George	2019	ILIOU machine learning preprocessing method for depression type prediction	EVOLVING SYSTEMS	10.1007/s12530-017-9205-9	WoS	FALSE
411	Aryana, Bijan; Brewster, Liz; Nocera, Jose Abdelnour	2019	Design for mobile mental health: an exploratory review	HEALTH AND TECHNOLOGY	10.1007/s12553-018-0271-1	WoS	FALSE
412	Post RM.	2010	Mechanisms of illness progression in the recurrent affective disorders	Neurotox Res	10.1007/s12640-010-9182-2	PubMed	FALSE
413	Zhou, Zhiguang; Zhu, Xiangjun; Liu, Yuhua; Ren, Qianqian; Wang, Changbo; Gu, Tianlong	2018	VisUPI: visual analytics for University Personality Inventory data	JOURNAL OF VISUALIZATION	10.1007/s12650-018-0499-x	WoS	FALSE
414	Baer, Ruth A.	2015	Assessing Mindfulness in Multiple Contexts: a Comment on Christopher, Woodrich, and Tiernan (2014)	MINDFULNESS	10.1007/s12671-014-0326-y	WoS	FALSE
415	Muris, Peter; Otgaar, Henry; Pfattheicher, Stefan	2019	Stripping the Forest from the Rotten Trees: Compassionate Self-Responding Is a Way of Coping, but Reduced Uncompassionate Self-Responding Mainly Reflects Psychopathology	MINDFULNESS	10.1007/s12671-018-1030-0	WoS	FALSE
416	Chua A Jr, Mendoza MJ, Ando M, Planilla CJ, Fernando G, Strebel HMJ, Ignacio J.	2020	Changing the Landscape of Medical Oncology Training at the National University Hospital in the Philippines during the Coronavirus Disease 2019 (COVID-19) Pandemic	J Cancer Educ	10.1007/s13187-020-01786-2	PubMed	FALSE
417	Chua, Alfredo; Mendoza, Marvin Jonne; Ando, Mark; Planilla, Cyril Jonas; Fernando, Gracieux; Strebel, Heinrik Martin Jude; Ignacio, Jorge	2020	Changing the Landscape of Medical Oncology Training at the National University Hospital in the Philippines during the Coronavirus Disease 2019 (COVID-19) Pandemic	JOURNAL OF CANCER EDUCATION	10.1007/s13187-020-01786-2	WoS	TRUE
418	Jepson P.	2019	Recoverable Earth: a twenty-first century environmental narrative	Ambio	10.1007/s13280-018-1065-4	PubMed	FALSE
419	Jepson, Paul	2019	Recoverable Earth: a twenty-first century environmental narrative	AMBIO	10.1007/s13280-018-1065-4	WoS	TRUE
420	Green RE, Pain DJ.	2019	Risks to human health from ammunition-derived lead in Europe	Ambio	10.1007/s13280-019-01194-x	PubMed	FALSE
421	Green, Rhys E.; Pain, Deborah J.	2019	Risks to human health from ammunition-derived lead in Europe	AMBIO	10.1007/s13280-019-01194-x	WoS	TRUE
422	Islam MR, Kabir MA, Ahmed A, Kamal ARM, Wang H, Ulhaq A.	2018	Depression detection from social network data using machine learning techniques	Health Inf Sci Syst	10.1007/s13755-018-0046-0	PubMed	FALSE
423	Mousavi A, Ardalan A, Takian A, Ostadtaghizadeh A, Naddafi K, Bavani AM.	2020	Climate change and health in Iran: a narrative review	J Environ Health Sci Eng	10.1007/s40201-020-00462-3	PubMed	FALSE
424	Mousavi, Arefeh; Ardalan, Ali; Takian, Amirhossein; Ostadtaghizadeh, Abbas; Naddafi, Kazem; Bavani, Alireza Massah	2020	Climate change and health in Iran: a narrative review	JOURNAL OF ENVIRONMENTAL HEALTH SCIENCE AND ENGINEERING	10.1007/s40201-020-00462-3	WoS	TRUE
425	Bandino JP, Hang A, Norton SA.	2015	The Infectious and Noninfectious Dermatological Consequences of Flooding: A Field Manual for the Responding Provider	Am J Clin Dermatol	10.1007/s40257-015-0138-4	PubMed	FALSE
426	Bandino, Justin P.; Hang, Anna; Norton, Scott A.	2015	The Infectious and Noninfectious Dermatological Consequences of Flooding: A Field Manual for the Responding Provider	AMERICAN JOURNAL OF CLINICAL DERMATOLOGY	10.1007/s40257-015-0138-4	WoS	TRUE
427	Mohiuddin S.	2014	A systematic and critical review of model-based economic evaluations of pharmacotherapeutics in patients with bipolar disorder	Appl Health Econ Health Policy	10.1007/s40258-014-0098-5	PubMed	FALSE
428	Rana AI, Castillo-Mancilla JR, Tashima KT, Landovitz RL.	2020	Advances in Long-Acting Agents for the Treatment of HIV Infection	Drugs	10.1007/s40265-020-01284-1	PubMed	FALSE
429	Rana, Aadia I.; Castillo-Mancilla, Jose R.; Tashima, Karen T.; Landovitz, Raphael L.	2020	Advances in Long-Acting Agents for the Treatment of HIV Infection	DRUGS	10.1007/s40265-020-01284-1	WoS	TRUE
430	Zheng Y, Pan F, Sorensen S.	2017	Modeling Treatment Sequences in Pharmacoeconomic Models	Pharmacoeconomics	10.1007/s40273-016-0455-3	PubMed	FALSE
431	Zheng, Ying; Pan, Feng; Sorensen, Sonja	2017	Modeling Treatment Sequences in Pharmacoeconomic Models	PHARMACOECONOMICS	10.1007/s40273-016-0455-3	WoS	TRUE
432	Bos I, De Boever P, Int Panis L, Meeusen R.	2014	Physical activity, air pollution and the brain	Sports Med	10.1007/s40279-014-0222-6	PubMed	FALSE
433	Petkova EP, Morita H, Kinney PL.	2014	Health impacts of heat in a changing climate: how can emerging science inform urban adaptation planning?	Curr Epidemiol Rep	10.1007/s40471-014-0009-1	PubMed	FALSE
434	James P, Banay RF, Hart JE, Laden F.	2015	A Review of the Health Benefits of Greenness	Curr Epidemiol Rep	10.1007/s40471-015-0043-7	PubMed	FALSE
435	Magee JC, Adut S, Brazill K, Warnick S.	2018	Mobile App Tools for Identifying and Managing Mental Health Disorders in Primary Care	Curr Treat Options Psychiatry	10.1007/s40501-018-0154-0	PubMed	FALSE
436	Boillot A, Ringuenet D, Kapila Y, Pallier A, Colon P, Bouchard P, Rang?� H.	2019	High serum ferritin levels are associated with a reduced periodontium in women with anorexia nervosa	Eat Weight Disord	10.1007/s40519-019-00832-3	PubMed	FALSE
437	Stansfeld S, Clark C.	2015	Health Effects of Noise Exposure in Children	Curr Environ Health Rep	10.1007/s40572-015-0044-1	PubMed	FALSE
438	Schneider A, R??ckerl R, Breitner S, Wolf K, Peters A.	2017	Thermal Control, Weather, and Aging	Curr Environ Health Rep	10.1007/s40572-017-0129-0	PubMed	FALSE
439	Hankey S, Marshall JD.	2017	Urban Form, Air Pollution, and Health	Curr Environ Health Rep	10.1007/s40572-017-0167-7	PubMed	FALSE
440	Zare Sakhvidi F, Zare Sakhvidi MJ, Mehrparvar AH, Dzhambov AM.	2018	Environmental Noise Exposure and Neurodevelopmental and Mental Health Problems in Children: a Systematic Review	Curr Environ Health Rep	10.1007/s40572-018-0208-x	PubMed	FALSE
441	Sakhvidi, Fariba Zare; Sakhvidi, Mohammad Javad Zare; Mehrparvar, Amir Houshang; Dzhambov, Angel M.	2018	Environmental Noise Exposure and Neurodevelopmental and Mental Health Problems in Children: a Systematic Review	CURRENT ENVIRONMENTAL HEALTH REPORTS	10.1007/s40572-018-0208-x	WoS	TRUE
442	de Prado Bert P, Mercader EMH, Pujol J, Sunyer J, Mortamais M.	2018	The Effects of Air Pollution on the Brain: a Review of Studies Interfacing Environmental Epidemiology and Neuroimaging	Curr Environ Health Rep	10.1007/s40572-018-0209-9	PubMed	FALSE
443	de Prado Bert, Paula; Henderson Mercader, Elisabet Mae; Pujol, Jesus; Sunyer, Jordi; Mortamais, Marion	2018	The Effects of Air Pollution on the Brain: a Review of Studies Interfacing Environmental Epidemiology and Neuroimaging	CURRENT ENVIRONMENTAL HEALTH REPORTS	10.1007/s40572-018-0209-9	WoS	TRUE
444	Zare Sakhvidi F, Zare Sakhvidi MJ, Mehrparvar AH, Dzhambov AM.	2018	Correction to: Environmental Noise Exposure and Neurodevelopmental and Mental Health Problems in Children: a Systematic Review	Curr Environ Health Rep	10.1007/s40572-018-0210-3	PubMed	FALSE
445	Sakhvidi, Fariba Zare; Sakhvidi, Mohammad Javad Zare; Mehrparvar, Amir Houshang; Dzhambov, Angel M.	2018	Environmental Noise Exposure and Neurodevelopmental and Mental Health Problems in Children: a Systematic Review (vol 86, pg 563, 2018)	CURRENT ENVIRONMENTAL HEALTH REPORTS	10.1007/s40572-018-0210-3	WoS	TRUE
446	Jaakkola JJK, Juntunen S, N?�kk?�l?�j?�rvi K.	2018	The Holistic Effects of Climate Change on the Culture, Well-Being, and Health of the Saami, the Only Indigenous People in the European Union	Curr Environ Health Rep	10.1007/s40572-018-0211-2	PubMed	FALSE
447	Jaakkola, Jouni J. K.; Juntunen, Suvi; Naekkaelaejaervi, Klemetti	2018	The Holistic Effects of Climate Change on the Culture, Well-Being, and Health of the Saami, the Only Indigenous People in the European Union	CURRENT ENVIRONMENTAL HEALTH REPORTS	10.1007/s40572-018-0211-2	WoS	TRUE
448	de Keijzer C, Bauwelinck M, Dadvand P.	2020	Long-Term Exposure to Residential Greenspace and Healthy Ageing: a Systematic Review	Curr Environ Health Rep	10.1007/s40572-020-00264-7	PubMed	FALSE
449	Dickerson AS, Wu AC, Liew Z, Weisskopf M.	2020	A Scoping Review of Non-Occupational Exposures to Environmental Pollutants and Adult Depression, Anxiety, and Suicide	Curr Environ Health Rep	10.1007/s40572-020-00280-7	PubMed	FALSE
450	Kirch, Darrell G.; Petelle, Kate	2018	Addressing the Health Effects of Climate Change: an Approach Based on Evidence and Ethics	ACADEMIC PSYCHIATRY	10.1007/s40596-018-0907-5	WoS	FALSE
451	Seritan AL, Seritan I.	2020	The Time Is Now: Climate Change and Mental Health	Acad Psychiatry	10.1007/s40596-020-01212-1	PubMed	FALSE
452	Seritan, Andreea L.; Seritan, Ioana	2020	The Time Is Now: Climate Change and Mental Health	ACADEMIC PSYCHIATRY	10.1007/s40596-020-01212-1	WoS	TRUE
453	Lai BS, Tiwari A, Self-Brown S, Cronholm P, Kinnish K.	2017	Patterns of Caregiver Factors Predicting Participation in Trauma-Focused Cognitive Behavioral Therapy	J Child Adolesc Trauma	10.1007/s40653-017-0177-5	PubMed	FALSE
454	Lai, Betty S.; Tiwari, Ashwini; Self-Brown, Shannon; Cronholm, Peter; Kinnish, Kelly	2019	Patterns of Caregiver Factors Predicting Participation in Trauma-Focused Cognitive Behavioral Therapy	JOURNAL OF CHILD & ADOLESCENT TRAUMA	10.1007/s40653-017-0177-5	WoS	TRUE
455	Bandyopadhyay, Amitava	2016	Neurological Disorders from Ambient (Urban) Air Pollution Emphasizing UFPM and PM2.5	CURRENT POLLUTION REPORTS	10.1007/s40726-016-0039-z	WoS	FALSE
456	Janssen, Bernd; Schaefer, Bernd	2017	Galantamine	CHEMTEXTS	10.1007/s40828-017-0043-y	WoS	FALSE
457	Wu, Yi-Ju; Outley, Corliss; Matarrita-Cascante, David; Murphrey, Theresa Pesl	2016	A Systematic Review of Recent Research on Adolescent Social Connectedness and Mental Health with Internet Technology Use	ADOLESCENT RESEARCH REVIEW	10.1007/s40894-015-0013-9	WoS	FALSE
458	Ungar T, Norman CD, Knaak S.	2017	Think You Can Shrink? A Proof-of-Concept Study for Men's Health Education Through Edutainment	J Technol Behav Sci	10.1007/s41347-016-0009-8	PubMed	FALSE
459	Collins, Lauren W.; Landrum, Timothy J.; Sweigart, Chris A.	2020	Extreme School Violence and Students with Emotional and Behavioral Disorders: (How) Do They Intersect?	EDUCATION AND TREATMENT OF CHILDREN	10.1007/s43494-020-00025-z	WoS	FALSE
460	Krishnan HR, Sakharkar AJ, Teppen TL, Berkel TD, Pandey SC.	2014	The epigenetic landscape of alcoholism	Int Rev Neurobiol	10.1016/B978-0-12-801311-3.00003-2	PubMed	FALSE
461	Krishnan, Harish R.; Sakharkar, Amul J.; Teppen, Tara L.; Berkel, Tiffani D. M.; Pandey, Subhash C.	2014	The Epigenetic Landscape of Alcoholism	International Review of Neurobiology	10.1016/B978-0-12-801311-3.00003-2	WoS	TRUE
462	Powell H, Kushner HI.	2015	Mozart at play: the limitations of attributing the etiology of genius to tourette syndrome and mental illness	Prog Brain Res	10.1016/bs.pbr.2014.11.010	PubMed	FALSE
463	Kennaway J.	2015	Historical perspectives on music as a cause of disease	Prog Brain Res	10.1016/bs.pbr.2014.11.017	PubMed	FALSE
464	Ballb?� M, Mart?�nez-S?�nchez JM, Gual A, Mart?�nez C, Fu M, Sureda X, Padr??n-Monedero A, Gal?�n I, Fern?�ndez E.	2015	Association of second-hand smoke exposure at home with psychological distress in the Spanish adult population	Addict Behav	10.1016/j.addbeh.2015.06.020	PubMed	FALSE
465	Spears CA, Jones DM, Pechacek TF, Ashley DL.	2019	Use of other combustible tobacco products among priority populations of smokers: Implications for U.S. tobacco regulatory policy	Addict Behav	10.1016/j.addbeh.2019.01.031	PubMed	FALSE
466	Spears, Claire Adams; Jones, Dina M.; Pechacek, Terry F.; Ashley, David L.	2019	Use of other combustible tobacco products among priority populations of smokers: Implications for US tobacco regulatory policy	ADDICTIVE BEHAVIORS	10.1016/j.addbeh.2019.01.031	WoS	TRUE
467	Cleverley K, Kidd SA.	2011	Resilience and suicidality among homeless youth	J Adolesc	10.1016/j.adolescence.2010.11.003	PubMed	FALSE
468	Beckman L, Svensson M.	2015	The cost-effectiveness of the Olweus Bullying Prevention Program: Results from a modelling study	J Adolesc	10.1016/j.adolescence.2015.07.020	PubMed	FALSE
469	Beckman, Linda; Svensson, Mikael	2015	The cost-effectiveness of the Olweus Bullying Prevention Program: Results from a modelling study	JOURNAL OF ADOLESCENCE	10.1016/j.adolescence.2015.07.020	WoS	TRUE
470	Mutz M, M??ller J.	2016	Mental health benefits of outdoor adventures: Results from two pilot studies	J Adolesc	10.1016/j.adolescence.2016.03.009	PubMed	FALSE
471	Mutz, Michael; Mueller, Johannes	2016	Mental health benefits of outdoor adventures: Results from two pilot studies	JOURNAL OF ADOLESCENCE	10.1016/j.adolescence.2016.03.009	WoS	TRUE
472	Mantler, Annemarie; Logan, Alan C.	2015	Natural environments and mental health	ADVANCES IN INTEGRATIVE MEDICINE	10.1016/j.aimed.2015.03.002	WoS	FALSE
473	Silverman, Michael J.; Rosenow, Sara	2013	Immediate quantitative effects of recreational music therapy on mood and perceived helpfulness in acute psychiatric inpatients: An exploratory investigation	ARTS IN PSYCHOTHERAPY	10.1016/j.aip.2013.04.001	WoS	FALSE
474	Schweitzer, Robert D.; Vromans, Lyn; Ranke, Grace; Griffin, Jane	2014	Narratives of healing: A case study of a young Liberian refugee settled in Australia	ARTS IN PSYCHOTHERAPY	10.1016/j.aip.2013.10.006	WoS	FALSE
475	Chong JX, McMillin MJ, Shively KM, Beck AE, Marvin CT, Armenteros JR, Buckingham KJ, Nkinsi NT, Boyle EA, Berry MN, Bocian M, Foulds N, Uzielli ML, Haldeman-Englert C, Hennekam RC, Kaplan P, Kline AD, Mercer CL, Nowaczyk MJ, Klein Wassink-Ruiter JS, McPherson EW, Moreno RA, Scheuerle AE, Shashi V, Stevens CA, Carey JC, Monteil A, Lory P, Tabor HK, Smith JD, Shendure J, Nickerson DA; University of…	2015	De novo mutations in NALCN cause a syndrome characterized by congenital contractures of the limbs and face, hypotonia, and developmental delay	Am J Hum Genet	10.1016/j.ajhg.2015.01.003	PubMed	FALSE
476	Keshavan MS.	2011	The changing global mental health landscape and need for leadership	Asian J Psychiatr	10.1016/j.ajp.2011.08.006	PubMed	FALSE
477	Rice SM, McIver LJ.	2016	Climate change and mental health: Rationale for research and intervention planning	Asian J Psychiatr	10.1016/j.ajp.2015.12.011	PubMed	FALSE
478	Bhat U S, Amaresha AC, Kodancha P, John S, Kumar S, Aiman A, Jain PA, Cherian AV.	2018	Psychological distress among college students of coastal district of Karnataka: A community-based cross-sectional survey	Asian J Psychiatr	10.1016/j.ajp.2018.10.006	PubMed	FALSE
479	Bhat, Shinivasa U.; Amaresha, Anekal C.; Kodancha, Prabhath; John, Soyuz; Kumar, Shishir; Aiman, Agneita; Jain, Praveen A.; Cherian, Anish, V	2018	Psychological distress among college students of coastal district of Karnataka: A community-based cross-sectional survey	ASIAN JOURNAL OF PSYCHIATRY	10.1016/j.ajp.2018.10.006	WoS	TRUE
480	Kumar A, Somani A.	2020	Dealing with Corona virus anxiety and OCD	Asian J Psychiatr	10.1016/j.ajp.2020.102053	PubMed	FALSE
481	Lavender A, Ramirez-Irizarry V, Bayakly AR, Koplan C, Bryan JM.	2016	Violent Deaths Among Georgia Workers: An Examination of Suicides and Homicides by Occupation, 2006-2009	Am J Prev Med	10.1016/j.amepre.2016.07.025	PubMed	FALSE
482	James P, Hart JE, Banay RF, Laden F, Signorello LB.	2017	Built Environment and Depression in Low-Income African Americans and Whites	Am J Prev Med	10.1016/j.amepre.2016.08.022	PubMed	FALSE
483	James, Peter; Hart, Jaime E.; Banay, Rachel F.; Laden, Francine; Signorello, Lisa B.	2017	Built Environment and Depression in Low-Income African Americans and Whites	AMERICAN JOURNAL OF PREVENTIVE MEDICINE	10.1016/j.amepre.2016.08.022	WoS	TRUE
484	Shargorodsky J, Curhan GC, Farwell WR.	2010	Prevalence and characteristics of tinnitus among US adults	Am J Med	10.1016/j.amjmed.2010.02.015	PubMed	FALSE
485	Milani RV, Bober RM, Lavie CJ, Wilt JK, Milani AR, White CJ.	2018	Reducing Hospital Toxicity: Impact on Patient Outcomes	Am J Med	10.1016/j.amjmed.2018.04.013	PubMed	FALSE
486	Moroge, Sophie; Paul, Frederic; Milan, Carole; Gignoux-Froment, Frederique; Pilard, Michel	2013	Nosological status of delusional parasitosis: About a case	ANNALES MEDICO-PSYCHOLOGIQUES	10.1016/j.amp.2013.04.010	WoS	FALSE
487	Prescott SL.	2020	A butterfly flaps its wings: Extinction of biological experience and the origins of allergy	Ann Allergy Asthma Immunol	10.1016/j.anai.2020.05.025	PubMed	FALSE
488	Bowles DC.	2015	Climate Change and Health Adaptation: Consequences for Indigenous Physical and Mental Health	Ann Glob Health	10.1016/j.aogh.2015.06.004	PubMed	FALSE
489	Bowles, Devin C.	2015	Climate Change and Health Adaptation: Consequences for Indigenous Physical and Mental Health	ANNALS OF GLOBAL HEALTH	10.1016/j.aogh.2015.06.004	WoS	TRUE
490	Levy BS, Patz JA.	2015	Climate Change, Human Rights, and Social Justice	Ann Glob Health	10.1016/j.aogh.2015.08.008	PubMed	FALSE
491	Levy, Barry S.; Patz, Jonathan A.	2015	Climate Change, Human Rights, and Social Justice	ANNALS OF GLOBAL HEALTH	10.1016/j.aogh.2015.08.008	WoS	TRUE
492	Aschengrau A, Janulewicz PA, White RF, Vieira VM, Gallagher LG, Getz KD, Webster TF, Ozonoff DM.	2016	Long-term Neurotoxic Effects of Early-life Exposure to?�Tetrachloroethylene-contaminated Drinking Water	Ann Glob Health	10.1016/j.aogh.2016.01.013	PubMed	FALSE
493	Aschengrau, Ann; Janulewicz, Patricia A.; White, Roberta F.; Vieira, Veronica M.; Gallagher, Lisa G.; Getz, Kelly D.; Webster, Thomas F.; Ozonoff, David M.	2016	Long-term Neurotoxic Effects of Early-life Exposure to Tetrachloroethylene-contaminated Drinking Water	ANNALS OF GLOBAL HEALTH	10.1016/j.aogh.2016.01.013	WoS	TRUE
494	de Oliveira Santos, Geanesson Alberto; do Nascimento, Eriberto Oliveira; Weinschutz, Regina; Mathias, Alvaro Luiz; Trombetta Zannin, Paulo Henrique	2020	Evaluation of tube-shaped bus shelters as a noise mitigation solution for passengers	APPLIED ACOUSTICS	10.1016/j.apacoust.2020.107245	WoS	FALSE
495	Chen, Guangwu; Zhu, Yuhan; Wiedmann, Thomas; Yao, Lina; Xu, Lixiao; Wang, Yafei	2019	Urban-rural disparities of household energy requirements and influence factors in China: Classification tree models	APPLIED ENERGY	10.1016/j.apenergy.2019.04.170	WoS	FALSE
496	Tobin, Graham A.; Whiteford, Linda M.; Jones, Eric C.; Murphy, Arthur D.; Garren, Sandra J.; Padros, Cecilia Vindrola	2011	The role of individual well-being in risk perception and evacuation for chronic vs. acute natural hazards in Mexico	APPLIED GEOGRAPHY	10.1016/j.apgeog.2010.12.008	WoS	FALSE
497	Wang, Bojie; Tang, Haiping; Xu, Ying	2017	Perceptions of human well-being across diverse respondents and landscapes in a mountain-basin system, China	APPLIED GEOGRAPHY	10.1016/j.apgeog.2017.05.006	WoS	FALSE
498	Aichele S, Rabbitt P, Ghisletta P.	2018	Cardiovascular symptoms and longitudinal declines in processing speed differentially predict cerebral white matter lesions in older adults	Arch Gerontol Geriatr	10.1016/j.archger.2018.06.010	PubMed	FALSE
499	Guo H, Wang T, Niu X, Wang H, Yang W, Qiu J, Yang L.	2018	The risk factors related to bruxism in children: A systematic review and meta-analysis	Arch Oral Biol	10.1016/j.archoralbio.2017.11.004	PubMed	FALSE
500	Guo, Huaqi; Wang, Tongxia; Niu, Xiaohong; Wang, Hui; Yang, Weihan; Qiu, Jie; Yang, Lan	2018	The risk factors related to bruxism in children: A systematic review and meta-analysis	ARCHIVES OF ORAL BIOLOGY	10.1016/j.archoralbio.2017.11.004	WoS	TRUE
501	Madigand-Tordjman MA, Egler PJ, Bertran F, Jokic M, Gu?�nol?� F.	2017	[Life-threatening sleepwalking (Elpenor's syndrome) in a 10-year-old child]	Arch Pediatr	10.1016/j.arcped.2017.03.011	PubMed	FALSE
502	Maltsev AV, Bystryak S, Galzitskaya OV.	2011	The role of ??-amyloid peptide in neurodegenerative diseases	Ageing Res Rev	10.1016/j.arr.2011.03.002	PubMed	FALSE
503	Maltsev, A. V.; Bystryak, S.; Galzitskaya, O. V.	2011	The role of beta-amyloid peptide in neurodegenerative diseases	AGEING RESEARCH REVIEWS	10.1016/j.arr.2011.03.002	WoS	TRUE
504	Tai AMY, Albuquerque A, Carmona NE, Subramanieapillai M, Cha DS, Sheko M, Lee Y, Mansur R, McIntyre RS.	2019	Machine learning and big data: Implications for disease modeling and therapeutic discovery in psychiatry	Artif Intell Med	10.1016/j.artmed.2019.101704	PubMed	FALSE
505	Soleimani, Zahra; Teymouri, Pari; Boloorani, Ali Darvishi; Mesdaghinia, Alireza; Middleton, Nick; Griffin, Dale W.	2020	An overview of bioaerosol load and health impacts associated with dust storms: A focus on the Middle East	ATMOSPHERIC ENVIRONMENT	10.1016/j.atmosenv.2019.117187	WoS	FALSE
506	Adelantado-Renau M, Esteban-Cornejo I, Rodriguez-Ayllon M, Cadenas-Sanchez C, Gil-Cosano JJ, Mora-Gonzalez J, Solis-Urra P, Verdejo-Rom?�n J, Aguilera CM, Escolano-Margarit MV, Verdejo-Garcia A, Catena A, Moliner-Urdiales D, Ortega FB.	2019	Inflammatory biomarkers and brain health indicators in children with overweight and obesity: The ActiveBrains project	Brain Behav Immun	10.1016/j.bbi.2019.07.020	PubMed	FALSE
507	Adelantado-Renau, Mireia; Esteban-Cornejo, Irene; Rodriguez-Ayllon, Maria; Cadenas-Sanchez, Cristina; Juan Gil-Cosano, Jose; Mora-Gonzalez, Jose; Solis-Urra, Patricio; Verdejo-Roman, Juan; Aguilera, Concepcion M.; Victoria Escolano-Margarit, Maria; Verdejo-Garcia, Antonio; Catena, Andres; Moliner-Urdiales, Diego; Ortega, Francisco B.	2019	Inflammatory biomarkers and brain health indicators in children with overweight and obesity: The ActiveBrains project	BRAIN BEHAVIOR AND IMMUNITY	10.1016/j.bbi.2019.07.020	WoS	TRUE
508	Maa?� SC, Riemer M, Wolbers T, van Rijn H.	2019	Timing deficiencies in amnestic Mild Cognitive Impairment: Disentangling clock and memory processes	Behav Brain Res	10.1016/j.bbr.2019.112110	PubMed	FALSE
509	Maass, Sarah C.; Riemer, Martin; Wolbers, Thomas; van Rijn, Hedderik	2019	Timing deficiencies in amnestic Mild Cognitive Impairment: Disentangling clock and memory processes	BEHAVIOURAL BRAIN RESEARCH	10.1016/j.bbr.2019.112110	WoS	TRUE
510	Caine, Joanne M.; Churches, Quentin; Waddington, Lynne; Nigro, Julie; Breheney, Kerry; Masters, Colin L.; Nuttall, Stewart D.; Streltsov, Victor A.	2014	Design of non-aggregating variants of A beta peptide	BIOCHEMICAL AND BIOPHYSICAL RESEARCH COMMUNICATIONS	10.1016/j.bbrc.2014.09.102	WoS	FALSE
511	Feczko E, Fair DA.	2020	Methods and Challenges for Assessing Heterogeneity	Biol Psychiatry	10.1016/j.biopsych.2020.02.015	PubMed	FALSE
512	Feczko, Eric; Fair, Damien A.	2020	Methods and Challenges for Assessing Heterogeneity	BIOLOGICAL PSYCHIATRY	10.1016/j.biopsych.2020.02.015	WoS	TRUE
513	Kilian J, Kitazawa M.	2018	The emerging risk of exposure to air pollution on?�cognitive decline and Alzheimer's disease - Evidence from epidemiological and animal studies	Biomed J	10.1016/j.bj.2018.06.001	PubMed	FALSE
514	Kilian, Jason; Kitazawa, Masashi	2018	The emerging risk of exposure to air pollution on cognitive decline and Alzheimer's disease - Evidence from epidemiological and animal studies	BIOMEDICAL JOURNAL	10.1016/j.bj.2018.06.001	WoS	TRUE
515	Walton EL.	2018	Tainted air: The link between pollution and Alzheimer's disease	Biomed J	10.1016/j.bj.2018.06.004	PubMed	FALSE
516	Walton, Emma Louise	2018	Tainted air: The link between pollution and Alzheimer's disease	BIOMEDICAL JOURNAL	10.1016/j.bj.2018.06.004	WoS	TRUE
517	Khalsa SS, Adolphs R, Cameron OG, Critchley HD, Davenport PW, Feinstein JS, Feusner JD, Garfinkel SN, Lane RD, Mehling WE, Meuret AE, Nemeroff CB, Oppenheimer S, Petzschner FH, Pollatos O, Rhudy JL, Schramm LP, Simmons WK, Stein MB, Stephan KE, Van den Bergh O, Van Diest I, von Leupoldt A, Paulus MP; Interoception Summit 2016 participants.	2018	Interoception and Mental Health: A Roadmap	Biol Psychiatry Cogn Neurosci Neuroimaging	10.1016/j.bpsc.2017.12.004	PubMed	FALSE
518	Khalsa, Sahib S.; Adolphs, Ralph; Cameron, Oliver G.; Critchley, Hugo D.; Davenport, Paul W.; Feinstein, Justin S.; Feusner, Jamie D.; Garfinkel, Sarah N.; Lane, Richard D.; Mehling, Wolf E.; Meuret, Alicia E.; Nemeroff, Charles B.; Oppenheimer, Stephen; Petzschner, Frederike H.; Pollatos, Olga; Rhudy, Jamie L.; Schramm, Lawrence P.; Simmons, W. Kyle; Stein, Murray B.; Stephan, Klaas E.; Van den …	2018	Interoception and Mental Health: A Roadmap	BIOLOGICAL PSYCHIATRY-COGNITIVE NEUROSCIENCE AND NEUROIMAGING	10.1016/j.bpsc.2017.12.004	WoS	TRUE
519	Rokham H, Pearlson G, Abrol A, Falakshahi H, Plis S, Calhoun VD.	2020	Addressing Inaccurate Nosology in Mental Health: A Multilabel Data Cleansing Approach for Detecting Label Noise From Structural Magnetic Resonance Imaging Data in Mood and Psychosis Disorders	Biol Psychiatry Cogn Neurosci Neuroimaging	10.1016/j.bpsc.2020.05.008	PubMed	FALSE
520	Moriyama, Karin; Kaga, Makiko	2013	Mental healthcare efforts for the public after the Great East Japan Earthquake "Guide to Good Mental Health for Those Affected by Natural Disasters" published by the Cabinet Office	BRAIN & DEVELOPMENT	10.1016/j.braindev.2012.11.003	WoS	FALSE
521	Luebke J, Barbas H, Peters A.	2010	Effects of normal aging on prefrontal area 46 in the rhesus monkey	Brain Res Rev	10.1016/j.brainresrev.2009.12.002	PubMed	FALSE
522	Luebke, Jennifer; Barbas, Helen; Peters, Alan	2010	Effects of normal aging on prefrontal area 46 in the rhesus monkey	BRAIN RESEARCH REVIEWS	10.1016/j.brainresrev.2009.12.002	WoS	TRUE
523	Lavender JM, Wonderlich SA, Crosby RD, Engel SG, Mitchell JE, Crow S, Peterson CB, Le Grange D.	2013	A naturalistic examination of body checking and dietary restriction in women with anorexia nervosa	Behav Res Ther	10.1016/j.brat.2013.05.004	PubMed	FALSE
524	Lavender, Jason M.; Wonderlich, Stephen A.; Crosby, Ross D.; Engel, Scott G.; Mitchell, James E.; Crow, Scott; Peterson, Carol B.; Le Grange, Daniel	2013	A naturalistic examination of body checking and dietary restriction in women with anorexia nervosa	BEHAVIOUR RESEARCH AND THERAPY	10.1016/j.brat.2013.05.004	WoS	TRUE
525	Lavender JM, Wonderlich SA, Crosby RD, Engel SG, Mitchell JE, Crow SJ, Peterson CB, Le Grange D.	2013	Personality-based subtypes of anorexia nervosa: examining validity and utility using baseline clinical variables and ecological momentary assessment	Behav Res Ther	10.1016/j.brat.2013.05.007	PubMed	FALSE
526	Lavender, Jason M.; Wonderlich, Stephen A.; Crosby, Ross D.; Engel, Scott G.; Mitchell, James E.; Crow, Scott J.; Peterson, Carol B.; Le Grange, Daniel	2013	Personality-based subtypes of anorexia nervosa: Examining validity and utility using baseline clinical variables and ecological momentary assessment	BEHAVIOUR RESEARCH AND THERAPY	10.1016/j.brat.2013.05.007	WoS	TRUE
527	Spyrou, Ioanna-Maria; Frantzidis, Christos; Bratsas, Charalampos; Antoniou, Ioannis; Bamidis, Panagiotis D.	2016	Geriatric depression symptoms coexisting with cognitive decline:. A comparison of classification methodologies	BIOMEDICAL SIGNAL PROCESSING AND CONTROL	10.1016/j.bspc.2015.10.006	WoS	FALSE
528	Kim, Jimin; Hong, Taehoon; Jeong, Jaemin; Koo, Choongwan; Kong, Minjin	2017	An integrated psychological response score of the occupants based on their activities and the indoor environmental quality condition changes	BUILDING AND ENVIRONMENT	10.1016/j.buildenv.2017.06.046	WoS	FALSE
529	Hoisington, Andrew J.; Stearns-Yoder, Kelly A.; Schuldt, Steven J.; Beemer, Cody J.; Maestre, Juan P.; Kinney, Kerry A.; Postolache, Teodor T.; Lowry, Christopher A.; Brenner, Lisa A.	2019	Ten questions concerning the built environment and mental health	BUILDING AND ENVIRONMENT	10.1016/j.buildenv.2019.03.036	WoS	FALSE
530	Dunleavy, Gerard; Bajpai, Ram; Tonon, Andre Comiran; Cheung, Kei Long; Thuan-Quoc Thach; Rykov, Yuri; Soh, Chee-Kiong; de Vries, Hein; Car, Josip; Christopoulos, Georgios	2020	Prevalence of psychological distress and its association with perceived indoor environmental quality and workplace factors in under and aboveground workplaces	BUILDING AND ENVIRONMENT	10.1016/j.buildenv.2020.106799	WoS	FALSE
531	Ben-Porath, Denise D.	2010	Dialectical Behavior Therapy Applied to Parent Skills Training: Adjunctive Treatment for Parents With Difficulties in Affect Regulation	COGNITIVE AND BEHAVIORAL PRACTICE	10.1016/j.cbpra.2009.07.005	WoS	FALSE
532	Chou, Tommy; Bry, Laura J.; Corner, Jonathan S.	2017	Multimedia Field Test: Evaluating the Creative Ambitions of SuperBetter and Its Quest to Gamify Mental Health	COGNITIVE AND BEHAVIORAL PRACTICE	10.1016/j.cbpra.2016.10.002	WoS	FALSE
533	Wallace J.	2014	Calcium dysregulation, and lithium treatment to forestall Alzheimer's disease - a merging of hypotheses	Cell Calcium	10.1016/j.ceca.2014.02.005	PubMed	FALSE
534	Wallace, James	2014	Calcium dysregulation, and lithium treatment to forestall Alzheimer's disease - a merging of hypotheses	CELL CALCIUM	10.1016/j.ceca.2014.02.005	WoS	TRUE
535	Krystal JH, State MW.	2014	Psychiatric disorders: diagnosis to therapy	Cell	10.1016/j.cell.2014.02.042	PubMed	FALSE
536	Krystal, John H.; State, Matthew W.	2014	Psychiatric Disorders: Diagnosis to Therapy	CELL	10.1016/j.cell.2014.02.042	WoS	TRUE
537	Patton, Desmond Upton; Hong, Jun Sung; Ranney, Megan; Patel, Sadiq; Kelley, Caitlin; Eschmann, Rob; Washington, Tyreasa	2014	Social media as a vector for youth violence: A review of the literature	COMPUTERS IN HUMAN BEHAVIOR	10.1016/j.chb.2014.02.043	WoS	FALSE
538	Carson NJ, Gansner M, Khang J.	2018	Assessment of Digital Media Use in the Adolescent Psychiatric Evaluation	Child Adolesc Psychiatr Clin N Am	10.1016/j.chc.2017.11.003	PubMed	FALSE
539	Carson, Nicholas J.; Gansner, Meredith; Khang, Jeane	2018	Assessment of Digital Media Use in the Adolescent Psychiatric Evaluation	CHILD AND ADOLESCENT PSYCHIATRIC CLINICS OF NORTH AMERICA	10.1016/j.chc.2017.11.003	WoS	TRUE
540	Bostic JQ, Thomas CR, Beresin EV, Rostain AL, Kaye DL.	2019	Make a Joyful Noise: Integrating Music into Child Psychiatry Evaluation and Treatment	Child Adolesc Psychiatr Clin N Am	10.1016/j.chc.2018.11.003	PubMed	FALSE
541	Bostic, Jeff Q.; Thomas, Christopher R.; Beresin, Eugene V.; Rostain, Anthony L.; Kaye, David L.	2019	Make a Joyful Noise: Integrating Music into Child Psychiatry Evaluation and Treatment	CHILD AND ADOLESCENT PSYCHIATRIC CLINICS OF NORTH AMERICA	10.1016/j.chc.2018.11.003	WoS	TRUE
542	Guha A, Luebbers S, Papalia N, Ogloff JRP.	2019	A follow-up study of mental health service utilisation in a cohort of 2433 sexually abused Australian children utilising five years of medical data	Child Abuse Negl	10.1016/j.chiabu.2019.01.015	PubMed	FALSE
543	Heflin, Colleen M.; Acevedo, Sharon Kukla	2011	Non-income effects of welfare receipt on early childhood cognitive scores	CHILDREN AND YOUTH SERVICES REVIEW	10.1016/j.childyouth.2010.11.006	WoS	FALSE
544	Liamputtong, Pranee; Kurban, Hala	2018	Health, social integration and social support: The lived experiences of young Middle-Eastern refugees living in Melbourne, Australia	CHILDREN AND YOUTH SERVICES REVIEW	10.1016/j.childyouth.2017.12.020	WoS	FALSE
545	King, Bryn; Fallon, Barbara; Filippelli, Joanne; Black, Tara; O'Connor, Carolyn	2018	Troubled teens and challenged caregivers: Characteristics associated with the decision to provide child welfare services to adolescents in Ontario, Canada	CHILDREN AND YOUTH SERVICES REVIEW	10.1016/j.childyouth.2018.02.037	WoS	FALSE
546	Harper, N. J.; Mott, A. J.; Obee, P.	2019	Client perspectives on wilderness therapy as a component of adolescent residential treatment for problematic substance use and mental health issues	CHILDREN AND YOUTH SERVICES REVIEW	10.1016/j.childyouth.2019.104450	WoS	FALSE
547	Utianski RL, Caviness JN, van Straaten EC, Beach TG, Dugger BN, Shill HA, Driver-Dunckley ED, Sabbagh MN, Mehta S, Adler CH, Hentz JG.	2016	Graph theory network function in Parkinson's disease assessed with electroencephalography	Clin Neurophysiol	10.1016/j.clinph.2016.02.017	PubMed	FALSE
548	Utianski, Rene L.; Caviness, John N.; van Straaten, Elisabeth C. W.; Beach, Thomas G.; Dugger, Brittany N.; Shill, Holly A.; Driver-Dunckley, Erika D.; Sabbagh, Marwan N.; Mehta, Shyamal; Adler, Charles H.; Hentz, Joseph G.	2016	Graph theory network function in Parkinson's disease assessed with electroencephalography	CLINICAL NEUROPHYSIOLOGY	10.1016/j.clinph.2016.02.017	WoS	TRUE
549	Lord K, Mitchell AJ, Ibrahim K, Kumar S, Rudd N, Symonds P.	2012	The beliefs and knowledge of patients newly diagnosed with cancer in a UK ethnically diverse population	Clin Oncol (R Coll Radiol)	10.1016/j.clon.2011.05.008	PubMed	FALSE
550	Lord, K.; Mitchell, A. J.; Ibrahim, K.; Kumar, S.; Rudd, N.; Symonds, P.	2012	The Beliefs and Knowledge of Patients Newly Diagnosed With Cancer in a UK Ethnically Diverse Population	CLINICAL ONCOLOGY	10.1016/j.clon.2011.05.008	WoS	TRUE
551	Moreira LB, Namen AA.	2018	A hybrid data mining model for diagnosis of patients with clinical suspicion of dementia	Comput Methods Programs Biomed	10.1016/j.cmpb.2018.08.016	PubMed	FALSE
552	Hinwood, Madeleine; Kluge, Murielle G.; Ilicic, Marina; Walker, Frederick Rohan	2019	Understanding microglial involvement in stress-induced mood disturbance: a modulator of vulnerability?	CURRENT OPINION IN BEHAVIORAL SCIENCES	10.1016/j.cobeha.2019.01.001	WoS	FALSE
553	Soley G, Spelke ES.	2016	Shared cultural knowledge: Effects of music on young children's social preferences	Cognition	10.1016/j.cognition.2015.09.017	PubMed	FALSE
554	Soley, Gaye; Spelke, Elizabeth S.	2016	Shared cultural knowledge: Effects of music on young children's social preferences	COGNITION	10.1016/j.cognition.2015.09.017	WoS	TRUE
555	Filippi R, Ceccolini A, Periche-Tomas E, Papageorgiou A, Bright P.	2020	Developmental trajectories of control of verbal and non-verbal interference in speech comprehension in monolingual and multilingual children	Cognition	10.1016/j.cognition.2020.104252	PubMed	FALSE
556	Filippi, Roberto; Ceccolini, Andrea; Periche-Tomas, Eva; Papageorgiou, Andriani; Bright, Peter	2020	Developmental trajectories of control of verbal and non-verbal interference in speech comprehension in monolingual and multilingual children	COGNITION	10.1016/j.cognition.2020.104252	WoS	TRUE
557	Koenig MA, Cole CA, Meyer M, Ridge KE, Kushnir T, Gelman SA.	2015	Reasoning about knowledge: Children's evaluations of generality and verifiability	Cogn Psychol	10.1016/j.cogpsych.2015.08.007	PubMed	FALSE
558	Koenig, Melissa A.; Cole, Caitlin A.; Meyer, Meredith; Ridge, Katherine E.; Kushnir, Tamar; Gelman, Susan A.	2015	Reasoning about knowledge: Children's evaluations of generality and verifiability	COGNITIVE PSYCHOLOGY	10.1016/j.cogpsych.2015.08.007	WoS	TRUE
559	Mayner L, Arbon P, Usher K.	2010	Emergency department patient presentations during the 2009 heatwaves in Adelaide	Collegian	10.1016/j.colegn.2010.09.004	PubMed	FALSE
560	Mayner, Lidia; Arbon, Paul; Usher, Kim	2010	Emergency department patient presentations during the 2009 heatwaves in Adelaide	COLLEGIAN	10.1016/j.colegn.2010.09.004	WoS	TRUE
561	Picot SA, Glaetzer KM, Myhill KJ.	2015	Coordinating end of life care for individuals with a mental illness--A nurse practitioner collaboration	Collegian	10.1016/j.colegn.2013.12.007	PubMed	FALSE
562	Picot, Sharon Anne; Glaetzer, Karen Michelle; Myhill, Karin Jasmine	2015	Coordinating end of life care for individuals with a mental illness-A nurse practitioner collaboration	COLLEGIAN	10.1016/j.colegn.2013.12.007	WoS	TRUE
563	Sekaran, Karthik; Sudha, M.	2020	Predicting drug responsiveness with deep learning from the effects on gene expression of Obsessive-Compulsive Disorder affected cases	COMPUTER COMMUNICATIONS	10.1016/j.comcom.2019.12.049	WoS	FALSE
564	Merckelbach H, Boskovic I, Pesy D, Dalsklev M, Lynn SJ.	2017	Symptom overreporting and dissociative experiences: A qualitative review	Conscious Cogn	10.1016/j.concog.2017.01.007	PubMed	FALSE
565	Merckelbach, H.; Boskovic, I.; Pesy, D.; Dalsklev, M.; Lynn, S. J.	2017	Symptom overreporting and dissociative experiences: A qualitative review	CONSCIOUSNESS AND COGNITION	10.1016/j.concog.2017.01.007	WoS	TRUE
566	Boda E, Rigamonti AE, Bollati V.	2019	Understanding the effects of air pollution on neurogenesis and gliogenesis in the growing and adult brain	Curr Opin Pharmacol	10.1016/j.coph.2019.12.003	PubMed	FALSE
567	Palinkas LA, Wong M.	2020	Global climate change and mental health	Curr Opin Psychol	10.1016/j.copsyc.2019.06.023	PubMed	FALSE
568	Palinkas, Lawrence A.; Wong, Marleen	2020	Global climate change and mental health	CURRENT OPINION IN PSYCHOLOGY	10.1016/j.copsyc.2019.06.023	WoS	TRUE
569	Reichert M, Braun U, Lautenbach S, Zipf A, Ebner-Priemer U, Tost H, Meyer-Lindenberg A.	2020	Studying the impact of built environments on human mental health in everyday life: methodological developments, state-of-the-art and technological frontiers	Curr Opin Psychol	10.1016/j.copsyc.2019.08.026	PubMed	FALSE
570	Reichert, Markus; Braun, Urs; Lautenbach, Sven; Zipf, Alexander; Ebner-Priemer, Ulrich; Tost, Heike; Meyer-Lindenberg, Andreas	2020	Studying the impact of built environments on human mental health in everyday life: methodological developments, state-of-the-art and technological frontiers	CURRENT OPINION IN PSYCHOLOGY	10.1016/j.copsyc.2019.08.026	WoS	TRUE
571	Kellermann TS, Bonilha L, Lin JJ, Hermann BP.	2015	Mapping the landscape of cognitive development in children with epilepsy	Cortex	10.1016/j.cortex.2015.02.001	PubMed	FALSE
572	Kellermann, Tanja S.; Bonilha, Leonardo; Lin, Jack J.; Hermann, Bruce P.	2015	Mapping the landscape of cognitive development in children with epilepsy	CORTEX	10.1016/j.cortex.2015.02.001	WoS	TRUE
573	Ziegler, Carol; Morelli, Vincent; Fawibe, Omotayo	2019	Climate Change and Underserved Communities	PHYSICIAN ASSISTANT CLINICS	10.1016/j.cpha.2018.08.008	WoS	FALSE
574	Weitzman M, Baten A, Rosenthal DG, Hoshino R, Tohn E, Jacobs DE.	2013	Housing and child health	Curr Probl Pediatr Adolesc Health Care	10.1016/j.cppeds.2013.06.001	PubMed	FALSE
575	Weitzman, Michael; Baten, Ahmareen; Rosenthal, David G.; Hoshino, Risa; Tohn, Ellen; Jacobs, David E.	2013	Housing and child Heagth	CURRENT PROBLEMS IN PEDIATRIC AND ADOLESCENT HEALTH CARE	10.1016/j.cppeds.2013.06.001	WoS	TRUE
576	Querstret D, Cropley M.	2013	Assessing treatments used to reduce rumination and/or worry: a systematic review	Clin Psychol Rev	10.1016/j.cpr.2013.08.004	PubMed	FALSE
577	Querstret, Dawn; Cropley, Mark	2013	Assessing treatments used to reduce rumination and/or worry: A systematic review	CLINICAL PSYCHOLOGY REVIEW	10.1016/j.cpr.2013.08.004	WoS	TRUE
578	Cooley SJ, Jones CR, Kurtz A, Robertson N.	2020	'Into the Wild': A meta-synthesis of talking therapy in natural outdoor spaces	Clin Psychol Rev	10.1016/j.cpr.2020.101841	PubMed	FALSE
579	Cooley, Sam J.; Jones, Ceri R.; Kurtz, Arabella; Robertson, Noelle	2020	'Into the Wild': A meta-synthesis of talking therapy in natural outdoor spaces	CLINICAL PSYCHOLOGY REVIEW	10.1016/j.cpr.2020.101841	WoS	TRUE
580	Acharibasam, Jeremiah Wezanamo; Anuga, Samuel Weniga	2018	Psychological distance of climate change and mental health risks assessment of smallholder farmers in Northern Ghana: Is habituation a threat to climate change?	CLIMATE RISK MANAGEMENT	10.1016/j.crm.2018.04.002	WoS	FALSE
581	Iyendo TO.	2017	Sound as a supportive design intervention for improving health care experience in the clinical ecosystem: A qualitative study	Complement Ther Clin Pract	10.1016/j.ctcp.2017.08.004	PubMed	FALSE
582	Alcantara J, Whetten A, Ohm J, Alcantara J.	2020	The relationship between quality of life and sense of coherence in patients presenting for care in a chiropractic practice-based research network	Complement Ther Med	10.1016/j.ctim.2019.102231	PubMed	FALSE
583	Wu YC, Lin YC, Yu HL, Chen JH, Chen TF, Sun Y, Wen LL, Yip PK, Chu YM, Chen YC.	2015	Association between air pollutants and dementia risk in the elderly	Alzheimers Dement (Amst)	10.1016/j.dadm.2014.11.015	PubMed	FALSE
584	Maserejian N, Bian S, Wang W, Jaeger J, Syrjanen JA, Aakre J, Jack CR Jr, Mielke MM, Gao F.	2019	Practical algorithms for amyloid ?? probability in subjective or mild cognitive impairment	Alzheimers Dement (Amst)	10.1016/j.dadm.2019.09.001	PubMed	FALSE
585	Jernigan TL, Brown SA; ABCD Consortium Coordinators.	2018	Introduction	Dev Cogn Neurosci	10.1016/j.dcn.2018.02.002	PubMed	FALSE
586	Huber, Elizabeth; Henriques, Rafael Neto; Owen, Julia P.; Rokem, Ariel; Yeatman, Jason D.	2019	Applying microstructural models to understand the role of white matter in cognitive development	DEVELOPMENTAL COGNITIVE NEUROSCIENCE	10.1016/j.dcn.2019.100624	WoS	FALSE
587	Gimm G, Hoffman D, Ireys HT.	2014	Early interventions to prevent disability for workers with mental health conditions: impacts from the DMIE	Disabil Health J	10.1016/j.dhjo.2013.07.002	PubMed	FALSE
588	Gimm, Gilbert; Hoffman, Denise; Ireys, Henry T.	2014	Early interventions to prevent disability for workers with mental health conditions: Impacts from the DMIE	DISABILITY AND HEALTH JOURNAL	10.1016/j.dhjo.2013.07.002	WoS	TRUE
589	Lloyd C, Page G, McKeganey N, Russell C.	2019	Capital depreciation: The lack of recovery capital and post-release support for prisoners leaving the Drug Recovery Wings in England and Wales	Int J Drug Policy	10.1016/j.drugpo.2019.06.012	PubMed	FALSE
590	Lloyd, Charlie; Page, Geoff; McKeganey, Neil; Russell, Christopher	2019	Capital depreciation: The lack of recovery capital and post-release support for prisoners leaving the Drug Recovery Wings in England and Wales	INTERNATIONAL JOURNAL OF DRUG POLICY	10.1016/j.drugpo.2019.06.012	WoS	TRUE
591	Taylor M.	2019	A review of food craving measures	Eat Behav	10.1016/j.eatbeh.2019.01.005	PubMed	FALSE
592	Taylor, Maija	2019	A review of food craving measures	EATING BEHAVIORS	10.1016/j.eatbeh.2019.01.005	WoS	TRUE
593	Tandon R, Pradhan S.	2019	Autistic features in Unverricht-Lundborg disease	Epilepsy Behav Rep	10.1016/j.ebr.2019.100323	PubMed	FALSE
594	Tsurumi, Tetsuya; Imauji, Atsushi; Managi, Shunsuke	2018	Greenery and Subjective Well-being: Assessing the Monetary Value of Greenery by Type	ECOLOGICAL ECONOMICS	10.1016/j.ecolecon.2018.02.014	WoS	FALSE
595	Yazd, Sahar Daghagh; Wheeler, Sarah Ann; Zuo, Alec	2020	Understanding the impacts of water scarcity and socio-economic demographics on farmer mental health in the Murray-Darling Basin	ECOLOGICAL ECONOMICS	10.1016/j.ecolecon.2019.106564	WoS	FALSE
596	Pascua, Pua'ala; McMillen, Heather; Ticktin, Tamara; Vaughan, Mehana; Winter, Kawika B.	2017	Beyond services: A process and framework to incorporate cultural, genealogical, place-based, and indigenous relationships in ecosystem service assessments	ECOSYSTEM SERVICES	10.1016/j.ecoser.2017.03.012	WoS	FALSE
597	Van Berkel DB, Tabrizian P, Dorning MA, Smart L, Newcomb D, Mehaffey M, Neale A, Meentemeyer RK.	2018	Quantifying the visual-sensory landscape qualities that contribute to cultural ecosystem services using social media and LiDAR	Ecosyst Serv	10.1016/j.ecoser.2018.03.022	PubMed	FALSE
598	Van Berkel, Derek B.; Tabrizian, Payam; Dorning, Monica A.; Smart, Lindsey; Newcomb, Doug; Mehaffey, Megan; Neale, Anne; Meentemeyer, Ross K.	2018	Quantifying the visual-sensory landscape qualities that contribute to cultural ecosystem services using social media and LiDAR	ECOSYSTEM SERVICES	10.1016/j.ecoser.2018.03.022	WoS	TRUE
599	van Oudenhoven, Alexander P. E.; Aukes, Ewert; Bontje, Lotte E.; Vikolainen, Vera; van Bodegom, Peter M.; Slinger, Jill H.	2018	'Mind the Gap' between ecosystem services classification and strategic decision making	ECOSYSTEM SERVICES	10.1016/j.ecoser.2018.09.003	WoS	FALSE
600	Gladkikh, Tatiana M.; Gould, Rachelle K.; Coleman, Kimberly J.	2019	Cultural ecosystem services and the well-being of refugee communities	ECOSYSTEM SERVICES	10.1016/j.ecoser.2019.101036	WoS	FALSE
601	Zhang Qi; Wang Zhenshu; Sun Yu; Wang Yu; Liu Zhanjie	2017	The Power System Environmental Optimal Dispatch Containing Air Quality Forecast	Energy Procedia	10.1016/j.egypro.2017.03.1053	WoS	FALSE
602	Zhao, Xiao-long; Zhao, Dong-qi; Zhou, Ye; Lv, Jia-jun	2017	The Microclimate Effect of Urban Park Fitness Trail in Spring - A Case Study of Harbin Zhao Lin Park	Energy Procedia	10.1016/j.egypro.2017.09.616	WoS	FALSE
603	Castelpietra, G.; Salvador-Carulla, L.; Almborg, A. -H.; Fernandez, A.; Madden, R.	2017	Working draft: Classifications of interventions in mental health care. An expert review	EUROPEAN JOURNAL OF PSYCHIATRY	10.1016/j.ejpsy.2017.10.001	WoS	FALSE
604	Halmer TC, Beall RC, Shah AA, Dark C.	2015	Health Policy Considerations in Treating Mental and Behavioral Health Emergencies in the United States	Emerg Med Clin North Am	10.1016/j.emc.2015.07.013	PubMed	FALSE
605	Halmer, Thiago C.; Beall, Rakel C.; Shah, Asim A.; Dark, Cedric	2015	Health Policy Considerations in Treating Mental and Behavioral Health Emergencies in the United States	EMERGENCY MEDICINE CLINICS OF NORTH AMERICA	10.1016/j.emc.2015.07.013	WoS	TRUE
606	Very E, Moncany AH, Yrondi A, Marquet T, Bui E, Schmitt L.	2018	[Work satisfaction and exhaustion among psychiatrists in psychiatric emergency services]	Encephale	10.1016/j.encep.2016.10.001	PubMed	FALSE
607	Dubreucq M, Jourdan S, Poizat A, Dubreucq J.	2020	[Midwives' feelings about the post-partum care of women with severe mental illness: A qualitative analysis]	Encephale	10.1016/j.encep.2019.07.009	PubMed	FALSE
608	Besch V, Debban?� M, Greiner C, Magnin C, De N?�ris M, Ambrosetti J, Perroud N, Poulet E, Prada P.	2020	Emergency psychiatric management of borderline personality disorder: Towards an articulation of modalities for personalised integrative care	Encephale	10.1016/j.encep.2020.04.013	PubMed	FALSE
609	Gonz?�lez Alonso S, Catal?� M, Maroto RR, Gil JL, de Miguel AG, Valc?�rcel Y.	2010	Pollution by psychoactive pharmaceuticals in the Rivers of Madrid metropolitan area (Spain)	Environ Int	10.1016/j.envint.2009.11.004	PubMed	FALSE
610	Pirrera S, De Valck E, Cluydts R.	2010	Nocturnal road traffic noise: A review on its assessment and consequences on sleep and health	Environ Int	10.1016/j.envint.2010.03.007	PubMed	FALSE
611	Pirrera, Sandra; De Valck, Elke; Cluydts, Raymond	2010	Nocturnal road traffic noise: A review on its assessment and consequences on sleep and health	ENVIRONMENT INTERNATIONAL	10.1016/j.envint.2010.03.007	WoS	TRUE
612	Dadvand P, de Nazelle A, Figueras F, Basaga??a X, Su J, Amoly E, Jerrett M, Vrijheid M, Sunyer J, Nieuwenhuijsen MJ.	2012	Green space, health inequality and pregnancy	Environ Int	10.1016/j.envint.2011.07.004	PubMed	FALSE
613	Dadvand, Payam; de Nazelle, Audrey; Figueras, Francesc; Basagana, Xavier; Su, Jason; Amoly, Elmira; Jerrett, Michael; Vrijheid, Martine; Sunyer, Jordi; Nieuwenhuijsen, Mark J.	2012	Green space, health inequality and pregnancy	ENVIRONMENT INTERNATIONAL	10.1016/j.envint.2011.07.004	WoS	TRUE
614	Forns J, Lertxundi N, Aranbarri A, Murcia M, Gascon M, Martinez D, Grellier J, Lertxundi A, Julvez J, Fano E, Go??i F, Grimalt JO, Ballester F, Sunyer J, Ibarluzea J.	2012	Prenatal exposure to organochlorine compounds and neuropsychological development up to two years of life	Environ Int	10.1016/j.envint.2012.04.009	PubMed	FALSE
615	Forns, Joan; Lertxundi, Nerea; Aranbarri, Aritz; Murcia, Mario; Gascon, Mireia; Martinez, David; Grellier, James; Lertxundi, Aitana; Julvez, Jordi; Fano, Eduardo; Goni, Fernando; Grimalt, Joan O.; Ballester, Ferran; Sunyer, Jordi; Ibarluzea, Jesus	2012	Prenatal exposure to organochlorine compounds and neuropsychological development up to two years of life	ENVIRONMENT INTERNATIONAL	10.1016/j.envint.2012.04.009	WoS	TRUE
616	Markevych I, Tiesler CM, Fuertes E, Romanos M, Dadvand P, Nieuwenhuijsen MJ, Berdel D, Koletzko S, Heinrich J.	2014	Access to urban green spaces and behavioural problems in children: Results from the GINIplus and LISAplus studies	Environ Int	10.1016/j.envint.2014.06.002	PubMed	FALSE
617	Lertxundi A, Baccini M, Lertxundi N, Fano E, Aranbarri A, Mart?�nez MD, Ayerdi M, ?�lvarez J, Santa-Marina L, Dorronsoro M, Ibarluzea J.	2015	Exposure to fine particle matter, nitrogen dioxide and benzene during pregnancy and cognitive and psychomotor developments in children at 15 months of age	Environ Int	10.1016/j.envint.2015.03.007	PubMed	FALSE
618	Lertxundi, Aitana; Baccini, Michela; Lertxundi, Nerea; Fano, Eduardo; Aranbarri, Aritz; Martinez, Maria Dolores; Ayerdi, Mikel; Alvarez, Jon; Santa-Marina, Loreto; Dorronsoro, Miren; Ibarluzea, Jesus	2015	Exposure to fine particle matter, nitrogen dioxide and benzene during pregnancy and cognitive and psychomotor developments in children at 15 months of age	ENVIRONMENT INTERNATIONAL	10.1016/j.envint.2015.03.007	WoS	TRUE
619	Gaspar FW, Harley KG, Kogut K, Chevrier J, Mora AM, Sj?�din A, Eskenazi B.	2015	Prenatal DDT and DDE exposure and child IQ in the CHAMACOS cohort	Environ Int	10.1016/j.envint.2015.09.004	PubMed	FALSE
620	Gaspar, Fraser W.; Harley, Kim G.; Kogut, Katherine; Chevrier, Jonathan; Maria Mora, Ana; Sjoedin, Andreas; Eskenazi, Brenda	2015	Prenatal DDT and DDE exposure and child IQ in the CHAMACOS cohort	ENVIRONMENT INTERNATIONAL	10.1016/j.envint.2015.09.004	WoS	TRUE
621	Liang CS, Duan FK, He KB, Ma YL.	2016	Review on recent progress in observations, source identifications and countermeasures of PM2.5	Environ Int	10.1016/j.envint.2015.10.016	PubMed	FALSE
622	Liang, Chun-Sheng; Duan, Feng-Kui; He, Ke-Bin; Ma, Yong-Liang	2016	Review on recent progress in observations, source identifications and countermeasures of PM2.5	ENVIRONMENT INTERNATIONAL	10.1016/j.envint.2015.10.016	WoS	TRUE
623	Dadvand P, Bartoll X, Basaga??a X, Dalmau-Bueno A, Martinez D, Ambros A, Cirach M, Triguero-Mas M, Gascon M, Borrell C, Nieuwenhuijsen MJ.	2016	Green spaces and General Health: Roles of mental health status, social support, and physical activity	Environ Int	10.1016/j.envint.2016.02.029	PubMed	FALSE
624	Dadvand, Payam; Bartoll, Xavier; Basagana, Xavier; Dalmau-Bueno, Albert; Martinez, David; Ambros, Albert; Cirach, Marta; Triguero-Mas, Margarita; Gascon, Mireia; Borrell, Carme; Nieuwenhuijsen, Mark J.	2016	Green spaces and General Health: Roles of mental health status, social support, and physical activity	ENVIRONMENT INTERNATIONAL	10.1016/j.envint.2016.02.029	WoS	TRUE
625	Kyriklaki A, Vafeiadi M, Kampouri M, Koutra K, Roumeliotaki T, Chalkiadaki G, Anousaki D, Rantakokko P, Kiviranta H, Fthenou E, Bitsios P, Kyrtopoulos SA, Kogevinas M, Chatzi L.	2016	Prenatal exposure to persistent organic pollutants in association with offspring neuropsychological development at 4years of age: The Rhea mother-child cohort, Crete, Greece	Environ Int	10.1016/j.envint.2016.09.012	PubMed	FALSE
626	Kyriklaki, Andriani; Vafeiadi, Marina; Kampouri, Mariza; Koutra, Katerina; Roumeliotaki, Theano; Chalkiadaki, Georgia; Anousaki, Despoina; Rantakokko, Panu; Kiviranta, Hannu; Fthenou, Eleni; Bitsios, Panos; Kyrtopoulos, Soterios A.; Kogevinas, Manolis; Chatzi, Leda	2016	Prenatal exposure to persistent organic pollutants in association with offspring neuropsychological development at 4 years of age: The Rhea mother-child cohort, Crete, Greece	ENVIRONMENT INTERNATIONAL	10.1016/j.envint.2016.09.012	WoS	TRUE
627	Tallon LA, Manjourides J, Pun VC, Salhi C, Suh H.	2017	Cognitive impacts of ambient air pollution in the National Social Health and Aging Project (NSHAP) cohort	Environ Int	10.1016/j.envint.2017.03.019	PubMed	FALSE
628	Tallon, Lindsay A.; Manjourides, Justin; Pun, Vivian C.; Salhi, Carmel; Suh, Helen	2017	Cognitive impacts of ambient air pollution in the National Social Health and Aging Project (NSHAP) cohort	ENVIRONMENT INTERNATIONAL	10.1016/j.envint.2017.03.019	WoS	TRUE
629	Dzhambov A, Tilov B, Markevych I, Dimitrova D.	2017	Residential road traffic noise and general mental health in youth: The role of noise annoyance, neighborhood restorative quality, physical activity, and social cohesion as potential mediators	Environ Int	10.1016/j.envint.2017.09.009	PubMed	FALSE
630	Dzhambov, Angel; Tilov, Boris; Markevych, Iana; Dimitrova, Donka	2017	Residential road traffic noise and general mental health in youth: The role of noise annoyance, neighborhood restorative quality, physical activity, and social cohesion as potential mediators	ENVIRONMENT INTERNATIONAL	10.1016/j.envint.2017.09.009	WoS	TRUE
631	Perera F, Lin CJ, Qu L, Tang D.	2018	Shorter telomere length in cord blood associated with prenatal air pollution exposure: Benefits of intervention	Environ Int	10.1016/j.envint.2018.01.005	PubMed	FALSE
632	Perera, Frederica; Lin, Chia-Jung; Qu, Lirong; Tang, Deliang	2018	Shorter telomere length in cord blood associated with prenatal air pollution exposure: Benefits of intervention	ENVIRONMENT INTERNATIONAL	10.1016/j.envint.2018.01.005	WoS	TRUE
633	Buoli M, Grassi S, Caldiroli A, Carnevali GS, Mucci F, Iodice S, Cantone L, Pergoli L, Bollati V.	2018	Is there a link between air pollution and mental disorders?	Environ Int	10.1016/j.envint.2018.05.044	PubMed	FALSE
634	Buoli, Massimiliano; Grassi, Silvia; Caldiroli, Alice; Carnevali, Greta Silvia; Mucci, Francesco; Iodice, Simona; Cantone, Laura; Pergoli, Laura; Bollati, Valentina	2018	Is there a link between air pollution and mental disorders?	ENVIRONMENT INTERNATIONAL	10.1016/j.envint.2018.05.044	WoS	TRUE
635	Okokon EO, Yli-Tuomi T, Turunen AW, Tiittanen P, Juutilainen J, Lanki T.	2018	Traffic noise, noise annoyance and psychotropic medication use	Environ Int	10.1016/j.envint.2018.06.034	PubMed	FALSE
636	Okokon, Enembe O.; Yli-Tuomi, Tarja; Turunen, Anu W.; Tiittanen, Pekka; Juutilainen, Jukka; Lanki, Timo	2018	Traffic noise, noise annoyance and psychotropic medication use	ENVIRONMENT INTERNATIONAL	10.1016/j.envint.2018.06.034	WoS	TRUE
637	Zock JP, Verheij R, Helbich M, Volker B, Spreeuwenberg P, Strak M, Janssen NAH, Dijst M, Groenewegen P.	2018	The impact of social capital, land use, air pollution and noise on individual morbidity in Dutch neighbourhoods	Environ Int	10.1016/j.envint.2018.09.008	PubMed	FALSE
638	Zock, Jan-Paul; Verheij, Robert; Helbich, Marco; Volker, Beate; Spreeuwenberg, Peter; Strak, Maciek; Janssen, Nicole A. H.; Dijst, Martin; Groenewegen, Peter	2018	The impact of social capital, land use, air pollution and noise on individual morbidity in Dutch neighbourhoods	ENVIRONMENT INTERNATIONAL	10.1016/j.envint.2018.09.008	WoS	TRUE
639	Chen G, Jin Z, Li S, Jin X, Tong S, Liu S, Yang Y, Huang H, Guo Y.	2018	Early life exposure to particulate matter air pollution (PM(1), PM(2.5) and PM(10)) and autism in Shanghai, China: A case-control study	Environ Int	10.1016/j.envint.2018.10.026	PubMed	FALSE
640	Godsmark CN, Irlam J, van der Merwe F, New M, Rother HA.	2019	Priority focus areas for a sub-national response to climate change and health: A South African provincial case study	Environ Int	10.1016/j.envint.2018.11.035	PubMed	FALSE
641	Godsmark, Christie Nicole; Irlam, James; van der Merwe, Frances; New, Mark; Rother, Hanna-Andrea	2019	Priority focus areas for a sub-national response to climate change and health: A South African provincial case study	ENVIRONMENT INTERNATIONAL	10.1016/j.envint.2018.11.035	WoS	TRUE
642	de Keijzer C, Tonne C, Sabia S, Basaga??a X, Valent?�n A, Singh-Manoux A, Ant?? JM, Alonso J, Nieuwenhuijsen MJ, Sunyer J, Dadvand P.	2019	Green and blue spaces and physical functioning in older adults: Longitudinal analyses of the Whitehall II study	Environ Int	10.1016/j.envint.2018.11.046	PubMed	FALSE
643	de Keijzer, Carmen; Tonne, Cathryn; Sabia, Severine; Basagana, Xavier; Valentin, Antonia; Singh-Manoux, Archana; Maria Anto, Josep; Alonso, Jordi; Nieuwenhuijsen, Mark J.; Sunyer, Jordi; Dadvand, Payam	2019	Green and blue spaces and physical functioning in older adults: Longitudinal analyses of the Whitehall II study	ENVIRONMENT INTERNATIONAL	10.1016/j.envint.2018.11.046	WoS	TRUE
644	Liao J, Zhang B, Xia W, Cao Z, Zhang Y, Liang S, Hu K, Xu S, Li Y.	2019	Residential exposure to green space and early childhood neurodevelopment	Environ Int	10.1016/j.envint.2019.03.070	PubMed	FALSE
645	Liao, Jiaqiang; Zhang, Bin; Xia, Wei; Cao, Zhongqiang; Zhang, Yimin; Liang, Shengwen; Hu, Ke; Xu, Shunqing; Li, Yuanyuan	2019	Residential exposure to green space and early childhood neurodevelopment	ENVIRONMENT INTERNATIONAL	10.1016/j.envint.2019.03.070	WoS	TRUE
646	Klompmaker JO, Hoek G, Bloemsma LD, Wijga AH, van den Brink C, Brunekreef B, Lebret E, Gehring U, Janssen NAH.	2019	Associations of combined exposures to surrounding green, air pollution and traffic noise on mental health	Environ Int	10.1016/j.envint.2019.05.040	PubMed	FALSE
647	Jorcano A, Lubczy?�ska MJ, Pierotti L, Altug H, Ballester F, Cesaroni G, El Marroun H, Fern?�ndez-Somoano A, Freire C, Hanke W, Hoek G, Ibarluzea J, I??iguez C, Jansen PW, Lepeule J, Markevych I, Pola?�ska K, Porta D, Schikowski T, Slama R, Standl M, Tardon A, Vrijkotte TGM, von Berg A, Tiemeier H, Sunyer J, Guxens M.	2019	Prenatal and postnatal exposure to air pollution and emotional and aggressive symptoms in children from 8 European birth cohorts	Environ Int	10.1016/j.envint.2019.104927	PubMed	FALSE
648	Jorcano, Ainhoa; Lubczynska, Malgorzata J.; Pierotti, Livia; Altug, Hicran; Ballester, Ferran; Cesaroni, Giulia; El Marroun, Hanan; Fernandez-Somoano, Ana; Freire, Carmen; Hanke, Wojciech; Hoek, Gerard; Ibarluzea, Jesus; Iniguez, Carmen; Jansen, Pauline W.; Lepeule, Johanna; Markevych, Iana; Polanska, Kinga; Porta, Daniela; Schikowski, Tamara; Slama, Remy; Standl, Marie; Tardon, Adonina; Vrijkott…	2019	Prenatal and postnatal exposure to air pollution and emotional and aggressive symptoms in children from 8 European birth cohorts	ENVIRONMENT INTERNATIONAL	10.1016/j.envint.2019.104927	WoS	TRUE
649	Pasanen TP, White MP, Wheeler BW, Garrett JK, Elliott LR.	2019	Neighbourhood blue space, health and wellbeing: The mediating role of different types of physical activity	Environ Int	10.1016/j.envint.2019.105016	PubMed	FALSE
650	Lee H, Jung J, Myung W, Baek JH, Kang JM, Kim DK, Kim H.	2019	Association between dust storm occurrence and risk of suicide: Case-crossover analysis of the Korean national death database	Environ Int	10.1016/j.envint.2019.105146	PubMed	FALSE
651	Lee, Hyewon; Jung, Jiyun; Myung, Woojae; Baek, Ji Hyun; Kang, Jae Myeong; Kim, Doh Kwan; Kim, Ho	2019	Association between dust storm occurrence and risk of suicide: Case-crossover analysis of the Korean national death database	ENVIRONMENT INTERNATIONAL	10.1016/j.envint.2019.105146	WoS	TRUE
652	Kumar P, Druckman A, Gallagher J, Gatersleben B, Allison S, Eisenman TS, Hoang U, Hama S, Tiwari A, Sharma A, Abhijith KV, Adlakha D, McNabola A, Astell-Burt T, Feng X, Skeldon AC, de Lusignan S, Morawska L.	2019	The nexus between air pollution, green infrastructure and human health	Environ Int	10.1016/j.envint.2019.105181	PubMed	FALSE
653	Kumar, Prashant; Druckman, Angela; Gallagher, John; Gatersleben, Birgitta; Allison, Sarah; Eisenman, Theodore S.; Hoang, Uy; Hama, Sarkawt; Tiwari, Arvind; Sharma, Ashish; Abhijith, K. V.; Adlakha, Deepti; McNabola, Aonghus; Astell-Burt, Thomas; Feng, Xiaoqi; Skeldon, Anne C.; de Lusignan, Simon; Morawska, Lidia	2019	The nexus between air pollution, green infrastructure and human health	ENVIRONMENT INTERNATIONAL	10.1016/j.envint.2019.105181	WoS	TRUE
654	Chen G, Xiang H, Mao Z, Huo W, Guo Y, Wang C, Li S.	2019	Is long-term exposure to air pollution associated with poor sleep quality in rural China?	Environ Int	10.1016/j.envint.2019.105205	PubMed	FALSE
655	Kulick ER, Elkind MSV, Boehme AK, Joyce NR, Schupf N, Kaufman JD, Mayeux R, Manly JJ, Wellenius GA.	2020	Long-term exposure to ambient air pollution, APOE-?�4 status, and cognitive decline in a cohort of older adults in northern Manhattan	Environ Int	10.1016/j.envint.2019.105440	PubMed	FALSE
656	Altu?� H, Fuks KB, H??ls A, Mayer AK, Tham R, Krutmann J, Schikowski T.	2020	Air pollution is associated with depressive symptoms in elderly women with cognitive impairment	Environ Int	10.1016/j.envint.2019.105448	PubMed	FALSE
657	Altug, Hicran; Fuks, Kateryna B.; Huels, Anke; Mayer, Anne-Kathrin; Tham, Rachel; Krutmann, Jean; Schikowski, Tamara	2020	Air pollution is associated with depressive symptoms in elderly women with cognitive impairment	ENVIRONMENT INTERNATIONAL	10.1016/j.envint.2019.105448	WoS	TRUE
658	Ma J, Li C, Kwan MP, Kou L, Chai Y.	2020	Assessing personal noise exposure and its relationship with mental health in Beijing based on individuals' space-time behavior	Environ Int	10.1016/j.envint.2020.105737	PubMed	FALSE
659	Ma, Jing; Li, Chunjiang; Kwan, Mei-Po; Kou, Lirong; Chai, Yanwei	2020	Assessing personal noise exposure and its relationship with mental health in Beijing based on individuals' space-time behavior	ENVIRONMENT INTERNATIONAL	10.1016/j.envint.2020.105737	WoS	TRUE
660	Lu P, Zhang Y, Xia G, Zhang W, Xu R, Wang C, Guo Y, Li S.	2020	Attributable risks associated with hospital outpatient visits for mental disorders due to air pollution: A multi-city study in China	Environ Int	10.1016/j.envint.2020.105906	PubMed	FALSE
661	Cerletti P, Eze IC, Schaffner E, Foraster M, Viennau D, Cajochen C, Wunderli JM, R?�?�sli M, Stolz D, Pons M, Imboden M, Probst-Hensch N.	2020	The independent association of source-specific transportation noise exposure, noise annoyance and noise sensitivity with health-related quality of life	Environ Int	10.1016/j.envint.2020.105960	PubMed	FALSE
662	Helbich M, O'Connor RC, Nieuwenhuijsen M, Hagedoorn P.	2020	Greenery exposure and suicide mortality later in life: A longitudinal register-based case-control study	Environ Int	10.1016/j.envint.2020.105982	PubMed	FALSE
663	Eze IC, Foraster M, Schaffner E, Vienneau D, Pieren R, Imboden M, Wunderli JM, Cajochen C, Brink M, R?�?�sli M, Probst-Hensch N.	2020	Incidence of depression in relation to transportation noise exposure and noise annoyance in the SAPALDIA study	Environ Int	10.1016/j.envint.2020.106014	PubMed	FALSE
664	Lederbogen F, Haddad L, Meyer-Lindenberg A.	2013	Urban social stress--risk factor for mental disorders. The case of schizophrenia	Environ Pollut	10.1016/j.envpol.2013.05.046	PubMed	FALSE
665	Lederbogen, Florian; Haddad, Leila; Meyer-Lindenberg, Andreas	2013	Urban social stress - Risk factor for mental disorders. The case of schizophrenia	ENVIRONMENTAL POLLUTION	10.1016/j.envpol.2013.05.046	WoS	TRUE
666	Wang Q, Yang Z.	2016	Industrial water pollution, water environment treatment, and health risks in China	Environ Pollut	10.1016/j.envpol.2016.07.011	PubMed	FALSE
667	Wang, Qing; Yang, Zhiming	2016	Industrial water pollution, water environment treatment, and health risks in China	ENVIRONMENTAL POLLUTION	10.1016/j.envpol.2016.07.011	WoS	TRUE
668	Alvarez-Pedrerol M, Rivas I, L??pez-Vicente M, Suades-Gonz?�lez E, Donaire-Gonzalez D, Cirach M, de Castro M, Esnaola M, Basaga??a X, Dadvand P, Nieuwenhuijsen M, Sunyer J.	2017	Impact of commuting exposure to traffic-related air pollution on cognitive development in children walking to school	Environ Pollut	10.1016/j.envpol.2017.08.075	PubMed	FALSE
669	Alvarez-Pedrerol, Mar; Rivas, Ioar; Lopez-Vicente, Monica; Suades-Gonzalez, Elisabet; Donaire-Gonzalez, David; Cirach, Marta; de Castro, Montserrat; Esnaola, Mikel; Basagana, Xavier; Dadvand, Payam; Nieuwenhuijsen, Mark; Sunyer, Jordi	2017	Impact of commuting exposure to traffic-related air pollution on cognitive development in children walking to school	ENVIRONMENTAL POLLUTION	10.1016/j.envpol.2017.08.075	WoS	TRUE
670	Andrade L, O'Dwyer J, O'Neill E, Hynds P.	2018	Surface water flooding, groundwater contamination, and enteric disease in developed countries: A scoping review of connections and?�consequences	Environ Pollut	10.1016/j.envpol.2018.01.104	PubMed	FALSE
671	Sygna K, Aasvang GM, Aamodt G, Oftedal B, Krog NH.	2014	Road traffic noise, sleep and mental health	Environ Res	10.1016/j.envres.2014.02.010	PubMed	FALSE
672	OBrien LV, Berry HL, Coleman C, Hanigan IC.	2014	Drought as a mental health exposure	Environ Res	10.1016/j.envres.2014.03.014	PubMed	FALSE
673	OBrien, L. V.; Berry, H. L.; Coleman, C.; Hanigan, I. C.	2014	Drought as a mental health exposure	ENVIRONMENTAL RESEARCH	10.1016/j.envres.2014.03.014	WoS	TRUE
674	Lamond JE, Joseph RD, Proverbs DG.	2015	An exploration of factors affecting the long term psychological impact and deterioration of mental health in flooded households	Environ Res	10.1016/j.envres.2015.04.008	PubMed	FALSE
675	Lamond, Jessica Elizabeth; Joseph, Rotimi D.; Proverbs, David G.	2015	An exploration of factors affecting the long term psychological impact and deterioration of mental health in flooded households	ENVIRONMENTAL RESEARCH	10.1016/j.envres.2015.04.008	WoS	TRUE
676	Dreger S, Meyer N, Fromme H, Bolte G; Study Group of the GME cohort.	2015	Environmental noise and incident mental health problems: A prospective cohort study among school children in Germany	Environ Res	10.1016/j.envres.2015.08.003	PubMed	FALSE
677	Dreger, Stefanie; Meyer, Nicole; Fromme, Hermann; Bolte, Gabriele	2015	Environmental noise and incident mental health problems: A prospective cohort study among school children in Germany	ENVIRONMENTAL RESEARCH	10.1016/j.envres.2015.08.003	WoS	TRUE
678	Clifford A, Lang L, Chen R, Anstey KJ, Seaton A.	2016	Exposure to air pollution and cognitive functioning across the life course--A systematic literature review	Environ Res	10.1016/j.envres.2016.01.018	PubMed	FALSE
679	Clifford, Angela; Lang, Linda; Chen, Ruoling; Anstey, Kaarin J.; Seaton, Anthony	2016	Exposure to air pollution and cognitive functioning across the life course - A systematic literature review	ENVIRONMENTAL RESEARCH	10.1016/j.envres.2016.01.018	WoS	TRUE
680	Grineski SE, Clark-Reyna SE, Collins TW.	2016	School-based exposure to hazardous air pollutants and grade point average: A multi-level study	Environ Res	10.1016/j.envres.2016.02.004	PubMed	FALSE
681	Stickley A, Sheng Ng CF, Konishi S, Koyanagi A, Watanabe C.	2017	Airborne pollen and suicide mortality in Tokyo, 2001-2011	Environ Res	10.1016/j.envres.2017.02.008	PubMed	FALSE
682	Zijlema WL, Triguero-Mas M, Smith G, Cirach M, Martinez D, Dadvand P, Gascon M, Jones M, Gidlow C, Hurst G, Masterson D, Ellis N, van den Berg M, Maas J, van Kamp I, van den Hazel P, Kruize H, Nieuwenhuijsen MJ, Julvez J.	2017	The relationship between natural outdoor environments and cognitive functioning and its mediators	Environ Res	10.1016/j.envres.2017.02.017	PubMed	FALSE
683	Zijlema, Wilma L.; Triguero-Mas, Margarita; Smith, Graham; Cirach, Marta; Martinez, David; Dadvand, Payam; Gascon, Mireia; Jones, Marc; Gidlow, Christopher; Hurst, Gemma; Masterson, Daniel; Ellis, Naomi; van den Berg, Magdalena; Maas, Jolanda; van Kamp, Irene; van den Hazel, Peter; Kruize, Hanneke; Nieuwenhuijsen, Mark J.; Julvez, Jordi	2017	The relationship between natural outdoor environments and cognitive functioning and its mediators	ENVIRONMENTAL RESEARCH	10.1016/j.envres.2017.02.017	WoS	TRUE
684	van den Bosch M, Ode Sang ?�.	2017	Urban natural environments as nature-based solutions for improved public health - A systematic review of reviews	Environ Res	10.1016/j.envres.2017.05.040	PubMed	FALSE
685	van den Bosch, M.; Sang, A. Ode	2017	Urban natural environments as nature-based solutions for improved public health - A systematic review of reviews	ENVIRONMENTAL RESEARCH	10.1016/j.envres.2017.05.040	WoS	TRUE
686	Vujcic M, Tomicevic-Dubljevic J, Grbic M, Lecic-Tosevski D, Vukovic O, Toskovic O.	2017	Nature based solution for improving mental health and well-being in urban areas	Environ Res	10.1016/j.envres.2017.06.030	PubMed	FALSE
687	Vujcic, Maja; Tomicevic-Dubljevic, Jelena; Grbic, Mihailo; Lecic-Tosevski, Dusica; Vukovic, Olivera; Toskovic, Oliver	2017	Nature based solution for improving mental health and well-being in urban areas	ENVIRONMENTAL RESEARCH	10.1016/j.envres.2017.06.030	WoS	TRUE
688	Richardson EA, Pearce J, Shortt NK, Mitchell R.	2017	The role of public and private natural space in children's social, emotional and behavioural development in Scotland: A longitudinal study	Environ Res	10.1016/j.envres.2017.07.038	PubMed	FALSE
689	Richardson, Elizabeth A.; Pearce, Jamie; Shortt, Niamh K.; Mitchell, Richard	2017	The role of public and private natural space in children's social, emotional and behavioural development in Scotland: A longitudinal study	ENVIRONMENTAL RESEARCH	10.1016/j.envres.2017.07.038	WoS	TRUE
690	Forns J, Dadvand P, Esnaola M, Alvarez-Pedrerol M, L??pez-Vicente M, Garcia-Esteban R, Cirach M, Basaga??a X, Guxens M, Sunyer J.	2017	Longitudinal association between air pollution exposure at school and cognitive development in school children over a period of 3.5 years	Environ Res	10.1016/j.envres.2017.08.031	PubMed	FALSE
691	Forns, Joan; Dadvand, Payam; Esnaola, Mikel; Alvarez-Pedrerol, Mar; Lopez-Vicente, Monica; Garcia-Esteban, Raquel; Cirach, Marta; Basagana, Xavier; Guxens, Monica; Sunyer, Jordi	2017	Longitudinal association between air pollution exposure at school and cognitive development in school children over a period of 3.5 years	ENVIRONMENTAL RESEARCH	10.1016/j.envres.2017.08.031	WoS	TRUE
692	Rugel EJ, Henderson SB, Carpiano RM, Brauer M.	2017	Beyond the Normalized Difference Vegetation Index (NDVI): Developing a Natural Space Index for population-level health research	Environ Res	10.1016/j.envres.2017.08.033	PubMed	FALSE
693	Rugel, Emily J.; Henderson, Sarah B.; Carpiano, Richard M.; Brauer, Michael	2017	Beyond the Normalized Difference Vegetation Index (NDVI): Developing a Natural Space Index for population-level health research	ENVIRONMENTAL RESEARCH	10.1016/j.envres.2017.08.033	WoS	TRUE
694	Dzhambov A, Hartig T, Markevych I, Tilov B, Dimitrova D.	2018	Urban residential greenspace and mental health in youth: Different approaches to testing multiple pathways yield different conclusions	Environ Res	10.1016/j.envres.2017.09.015	PubMed	FALSE
695	Dzhambov, Angel; Hartig, Terry; Markevych, Iana; Tilov, Boris; Dimitrova, Donka	2018	Urban residential greenspace and mental health in youth: Different approaches to testing multiple pathways yield different conclusions	ENVIRONMENTAL RESEARCH	10.1016/j.envres.2017.09.015	WoS	TRUE
696	Fioravanti S, Cesaroni G, Badaloni C, Michelozzi P, Forastiere F, Porta D.	2018	Traffic-related air pollution and childhood obesity in an Italian birth cohort	Environ Res	10.1016/j.envres.2017.10.003	PubMed	FALSE
697	Gascon M, S?�nchez-Benavides G, Dadvand P, Mart?�nez D, Gramunt N, Gotsens X, Cirach M, Vert C, Molinuevo JL, Crous-Bou M, Nieuwenhuijsen M.	2018	Long-term exposure to residential green and blue spaces and anxiety and depression in adults: A cross-sectional study	Environ Res	10.1016/j.envres.2018.01.012	PubMed	FALSE
698	Russell CL.	2018	5 G wireless telecommunications expansion: Public health and environmental implications	Environ Res	10.1016/j.envres.2018.01.016	PubMed	FALSE
699	Russell, Cindy L.	2018	5 G wireless telecommunications expansion: Public health and environmental implications	ENVIRONMENTAL RESEARCH	10.1016/j.envres.2018.01.016	WoS	TRUE
700	Zhao T, Markevych I, Romanos M, Nowak D, Heinrich J.	2018	Ambient ozone exposure and mental health: A systematic review of epidemiological studies	Environ Res	10.1016/j.envres.2018.04.015	PubMed	FALSE
701	Zhao, Tianyu; Markevych, Iana; Romanos, Marcel; Nowak, Dennis; Heinrich, Joachim	2018	Ambient ozone exposure and mental health: A systematic review of epidemiological studies	ENVIRONMENTAL RESEARCH	10.1016/j.envres.2018.04.015	WoS	TRUE
702	Dzhambov AM, Markevych I, Hartig T, Tilov B, Arabadzhiev Z, Stoyanov D, Gatseva P, Dimitrova DD.	2018	Multiple pathways link urban green- and bluespace to mental health in young adults	Environ Res	10.1016/j.envres.2018.06.004	PubMed	FALSE
703	Dzhambov, Angel M.; Markevych, Iana; Hartig, Terry; Tilov, Boris; Arabadzhiev, Zlatoslav; Stoyanov, Drozdstoj; Gatseva, Penka; Dimitrova, Donka D.	2018	Multiple pathways link urban green- and bluespace to mental health in young adults	ENVIRONMENTAL RESEARCH	10.1016/j.envres.2018.06.004	WoS	TRUE
704	Dzhambov AM, Markevych I, Tilov B, Arabadzhiev Z, Stoyanov D, Gatseva P, Dimitrova DD.	2018	Pathways linking residential noise and air pollution to mental ill-health in young adults	Environ Res	10.1016/j.envres.2018.06.031	PubMed	FALSE
705	Dzhambov, Angel M.; Markevych, Iana; Tilov, Boris; Arabadzhiev, Zlatoslav; Stoyanov, Drozdstoj; Gatseva, Penka; Dimitrova, Donka D.	2018	Pathways linking residential noise and air pollution to mental ill-health in young adults	ENVIRONMENTAL RESEARCH	10.1016/j.envres.2018.06.031	WoS	TRUE
706	Dadvand P, Hariri S, Abbasi B, Heshmat R, Qorbani M, Motlagh ME, Basaga??a X, Kelishadi R.	2019	Use of green spaces, self-satisfaction and social contacts in adolescents: A population-based CASPIAN-V study	Environ Res	10.1016/j.envres.2018.09.033	PubMed	FALSE
707	Dadvand, Payam; Hariri, Sanam; Abbasi, Behzad; Heshmat, Ramin; Qorbani, Mostafa; Motlagh, Mohammad Esmaeil; Basagana, Xavier; Kelishadi, Roya	2019	Use of green spaces, self-satisfaction and social contacts in adolescents: A population-based CASPIAN-V study	ENVIRONMENTAL RESEARCH	10.1016/j.envres.2018.09.033	WoS	TRUE
708	Liao W, Yang L, Zhong S, Hess JJ, Wang Q, Bao J, Huang C.	2019	Preparing the next generation of health professionals to tackle climate change: Are China's medical students ready?	Environ Res	10.1016/j.envres.2018.10.006	PubMed	FALSE
709	Freiberg A, Schefter C, Girbig M, Murta VC, Seidler A.	2019	Health effects of wind turbines on humans in residential settings: Results of a scoping review	Environ Res	10.1016/j.envres.2018.11.032	PubMed	FALSE
710	Freiberg, Alice; Schefter, Christiane; Girbig, Maria; Murta, Vanise C.; Seidler, Andreas	2019	Health effects of wind turbines on humans in residential settings: Results of a scoping review	ENVIRONMENTAL RESEARCH	10.1016/j.envres.2018.11.032	WoS	TRUE
711	He S, Smargiassi A, Low N, Bilodeau-Bertrand M, Ayoub A, Auger N.	2019	Residential noise exposure and the longitudinal risk of hospitalization for depression after pregnancy: Postpartum and beyond	Environ Res	10.1016/j.envres.2018.12.001	PubMed	FALSE
712	Rugel EJ, Carpiano RM, Henderson SB, Brauer M.	2019	Exposure to natural space, sense of community belonging, and adverse mental health outcomes across an urban region	Environ Res	10.1016/j.envres.2019.01.034	PubMed	FALSE
713	Yolton K, Khoury JC, Burkle J, LeMasters G, Cecil K, Ryan P.	2019	lifetime exposure to traffic-related air pollution and symptoms of depression and anxiety at age 12 years	Environ Res	10.1016/j.envres.2019.03.005	PubMed	FALSE
714	Yolton, Kimberly; Khoury, Jane C.; Burkle, Jeffrey; LeMasters, Grace; Cecil, Kim; Ryan, Patrick	2019	lifetime exposure to traffic-related air pollution and symptoms of depression and anxiety at age 12 years	ENVIRONMENTAL RESEARCH	10.1016/j.envres.2019.03.005	WoS	TRUE
715	Lertxundi A, Andiarena A, Mart?�nez MD, Ayerdi M, Murcia M, Estarlich M, Guxens M, Sunyer J, Julvez J, Ibarluzea J.	2019	Prenatal exposure to PM(2.5) and NO(2) and sex-dependent infant cognitive and motor development	Environ Res	10.1016/j.envres.2019.04.001	PubMed	FALSE
716	Lertxundi, Aitana; Andiarena, Ainara; Dolores Martinez, Maria; Ayerdi, Mikel; Murcia, Mario; Estarlich, Marisa; Guxens, Monica; Sunyer, Jordi; Julvez, Jordi; Ibarluzea, Jesus	2019	Prenatal exposure to PM2.5 and NO2 and sex-dependent infant cognitive and motor development	ENVIRONMENTAL RESEARCH	10.1016/j.envres.2019.04.001	WoS	TRUE
717	Brunst KJ, Ryan PH, Altaye M, Yolton K, Maloney T, Beckwith T, LeMasters G, Cecil KM.	2019	Myo-inositol mediates the effects of traffic-related air pollution on generalized anxiety symptoms at age 12�ǻyears	Environ Res	10.1016/j.envres.2019.05.009	PubMed	FALSE
718	Brunst, Kelly J.; Ryan, Patrick H.; Altaye, Mekibib; Yolton, Kimberly; Maloney, Thomas; Beckwith, Travis; LeMasters, Grace; Cecil, Kim M.	2019	Myo-inositol mediates the effects of traffic-related air pollution on generalized anxiety symptoms at age 12 years	ENVIRONMENTAL RESEARCH	10.1016/j.envres.2019.05.009	WoS	TRUE
719	Wang R, Helbich M, Yao Y, Zhang J, Liu P, Yuan Y, Liu Y.	2019	Urban greenery and mental wellbeing in adults: Cross-sectional mediation analyses on multiple pathways across different greenery measures	Environ Res	10.1016/j.envres.2019.108535	PubMed	FALSE
720	Wang, Ruoyu; Helbich, Marco; Yao, Yao; Zhang, Jinbao; Liu, Penghua; Yuan, Yuan; Liu, Ye	2019	Urban greenery and mental wellbeing in adults: Cross-sectional mediation analyses on multiple pathways across different greenery measures	ENVIRONMENTAL RESEARCH	10.1016/j.envres.2019.108535	WoS	TRUE
721	Nuyts V, Nawrot TS, Scheers H, Nemery B, Casas L.	2019	Air pollution and self-perceived stress and mood: A one-year panel study of healthy elderly persons	Environ Res	10.1016/j.envres.2019.108644	PubMed	FALSE
722	Nuyts, Valerie; Nawrot, Tim S.; Scheers, Hans; Nemery, Benoit; Casas, Lidia	2019	Air pollution and self-perceived stress and mood: A one-year panel study of healthy elderly persons	ENVIRONMENTAL RESEARCH	10.1016/j.envres.2019.108644	WoS	TRUE
723	Dzhambov AM, Hartig T, Tilov B, Atanasova V, Makakova DR, Dimitrova DD.	2019	Residential greenspace is associated with mental health via intertwined capacity-building and capacity-restoring pathways	Environ Res	10.1016/j.envres.2019.108708	PubMed	FALSE
724	Dzhambov, Angel M.; Hartig, Terry; Tilov, Boris; Atanasova, Victoria; Makakova, Desislava R.; Dimitrova, Donka D.	2019	Residential greenspace is associated with mental health via intertwined capacity-building and capacity-restoring pathways	ENVIRONMENTAL RESEARCH	10.1016/j.envres.2019.108708	WoS	TRUE
725	Nilsen FM, Tulve NS.	2020	A systematic review and meta-analysis examining the interrelationships between chemical and non-chemical stressors and inherent characteristics in children with ADHD	Environ Res	10.1016/j.envres.2019.108884	PubMed	FALSE
726	Nilsen, Frances M.; Tulve, Nicolle S.	2020	A systematic review and meta-analysis examining the interrelationships between chemical and non-chemical stressors and inherent characteristics in children with ADHD	ENVIRONMENTAL RESEARCH	10.1016/j.envres.2019.108884	WoS	TRUE
727	Hooyberg A, Roose H, Grellier J, Elliott LR, Lonneville B, White MP, Michels N, De Henauw S, Vandegehuchte M, Everaert G.	2020	General health and residential proximity to the coast in Belgium: Results from a cross-sectional health survey	Environ Res	10.1016/j.envres.2020.109225	PubMed	FALSE
728	Hooyberg, Alexander; Roose, Henk; Grellier, James; Elliott, Lewis R.; Lonneville, Britt; White, Mathew P.; Michels, Nathalie; De Henauw, Stefaan; Vandegehuchte, Michiel; Everaert, Gert	2020	General health and residential proximity to the coast in Belgium: Results from a cross-sectional health survey	ENVIRONMENTAL RESEARCH	10.1016/j.envres.2020.109225	WoS	TRUE
729	Dzhambov AM, Browning MHEM, Markevych I, Hartig T, Lercher P.	2020	Analytical approaches to testing pathways linking greenspace to health: A scoping review of the empirical literature	Environ Res	10.1016/j.envres.2020.109613	PubMed	FALSE
730	Dzhambov, Angel M.; Browning, Matthew H. E. M.; Markevych, Iana; Hartig, Terry; Lercher, Peter	2020	Analytical approaches to testing pathways linking greenspace to health: A scoping review of the empirical literature	ENVIRONMENTAL RESEARCH	10.1016/j.envres.2020.109613	WoS	TRUE
731	Jarvis I, Koehoorn M, Gergel SE, van den Bosch M.	2020	Different types of urban natural environments influence various dimensions of self-reported health	Environ Res	10.1016/j.envres.2020.109614	PubMed	FALSE
732	Jarvis, Ingrid; Koehoorn, Mieke; Gergel, Sarah E.; van den Bosch, Matilda	2020	Different types of urban natural environments influence various dimensions of self-reported health	ENVIRONMENTAL RESEARCH	10.1016/j.envres.2020.109614	WoS	TRUE
733	Engemann K, Svenning JC, Arge L, Brandt J, Erikstrup C, Geels C, Hertel O, Mortensen PB, Plana-Ripoll O, Tsirogiannis C, Sabel CE, Sigsgaard T, Pedersen CB.	2020	Associations between growing up in natural environments and subsequent psychiatric disorders in Denmark	Environ Res	10.1016/j.envres.2020.109788	PubMed	FALSE
734	Enssle, Friederike; Kabisch, Nadja	2020	Urban green spaces for the social interaction, health and well-being of older people-An integrated view of urban ecosystem services and socio-environmental justice	ENVIRONMENTAL SCIENCE & POLICY	10.1016/j.envsci.2020.04.008	WoS	FALSE
735	Sokolova, Marina V.; Gonzalez-Marti, Irene; Contreras Jordan, Onofre Ricardo; Fernandez Bustos, Juan Gregorio	2013	A case study of muscle dysmorphia disorder diagnostics	EXPERT SYSTEMS WITH APPLICATIONS	10.1016/j.eswa.2013.01.023	WoS	FALSE
736	Larivi?�re V, Diepeveen S, Ni Chonaill S, Macaluso B, Pollitt A, Grant J.	2013	International comparative performance of mental health research, 1980-2011	Eur Neuropsychopharmacol	10.1016/j.euroneuro.2013.01.006	PubMed	FALSE
737	Lariviere, Vincent; Diepeveen, Stephanie; Chonaill, Siobhan Ni; Macaluso, Benoit; Pollitt, Alexandra; Grant, Jonathan	2013	International comparative performance of mental health research, 1980-2011	EUROPEAN NEUROPSYCHOPHARMACOLOGY	10.1016/j.euroneuro.2013.01.006	WoS	TRUE
738	Yoshino Y, Roy B, Dwivedi Y.	2020	Altered miRNA landscape of the anterior cingulate cortex is associated with potential loss of key neuronal functions in depressed brain	Eur Neuropsychopharmacol	10.1016/j.euroneuro.2020.06.004	PubMed	FALSE
739	Bowen DJ, Neill JT, Crisp SJR.	2016	Wilderness adventure therapy effects on the mental health of youth participants	Eval Program Plann	10.1016/j.evalprogplan.2016.05.005	PubMed	FALSE
740	Bowen, Daniel J.; Neill, James T.; Crisp, Simon J. R.	2016	Wilderness adventure therapy effects on the mental health of youth participants	EVALUATION AND PROGRAM PLANNING	10.1016/j.evalprogplan.2016.05.005	WoS	TRUE
741	Coll KM, Sawyer S, Scholl S, Hauser N.	2019	A logic model development for an adolescent based intervention to improve benefits from Therapeutic Residential Care (TRC)	Eval Program Plann	10.1016/j.evalprogplan.2019.101678	PubMed	FALSE
742	Coll, Kenneth M.; Sawyer, Stephanie; Scholl, Stacey; Hauser, Nicole	2019	A logic model development for an adolescent based intervention to improve benefits from Therapeutic Residential Care (TRC)	EVALUATION AND PROGRAM PLANNING	10.1016/j.evalprogplan.2019.101678	WoS	TRUE
743	Scarabino D, Broggio E, Gambina G, Corbo RM.	2017	Leukocyte telomere length in mild cognitive impairment and Alzheimer's disease patients	Exp Gerontol	10.1016/j.exger.2017.08.025	PubMed	FALSE
744	Sassi S, Hakko H, R?�ty E, Riipinen P.	2018	Light motor vehicle collisions with heavy vehicles - Psychosocial and health related risk factors of drivers being at-fault for collisions	Forensic Sci Int	10.1016/j.forsciint.2018.08.037	PubMed	FALSE
745	Ord????ez-Iriarte JM.	2020	[Mental health and environmental health. A prospective view. SESPAS Report 2020]	Gac Sanit	10.1016/j.gaceta.2020.05.007	PubMed	FALSE
746	Mills PD, King LA, Watts BV, Hemphill RR.	2013	Inpatient suicide on mental health units in Veterans Affairs (VA) hospitals: avoiding environmental hazards	Gen Hosp Psychiatry	10.1016/j.genhosppsych.2013.03.021	PubMed	FALSE
747	Mills, Peter D.; King, Lori A.; Watts, Bradley V.; Hemphill, Robin R.	2013	Inpatient suicide on mental health units in Veterans Affairs (VA) hospitals: avoiding environmental hazards	GENERAL HOSPITAL PSYCHIATRY	10.1016/j.genhosppsych.2013.03.021	WoS	TRUE
748	Chen JA, Chung WJ, Young SK, Tuttle MC, Collins MB, Darghouth SL, Longley R, Levy R, Razafsha M, Kerner JC, Wozniak J, Huffman JC.	2020	COVID-19 and telepsychiatry: Early outpatient experiences and implications for the future	Gen Hosp Psychiatry	10.1016/j.genhosppsych.2020.07.002	PubMed	FALSE
749	Phillips, Judith; Walford, Nigel; Hockey, Ann; Foreman, Nigel; Lewis, Michael	2013	Older people and outdoor environments: Pedestrian anxieties and barriers in the use of familiar and unfamiliar spaces	GEOFORUM	10.1016/j.geoforum.2013.04.002	WoS	FALSE
750	MacKerron, George; Mourato, Susana	2013	Happiness is greater in natural environments	GLOBAL ENVIRONMENTAL CHANGE-HUMAN AND POLICY DIMENSIONS	10.1016/j.gloenvcha.2013.03.010	WoS	FALSE
751	Helm, Sabrina V.; Pollitt, Amanda; Barnett, Melissa A.; Curran, Melissa A.; Craig, Zelieann R.	2018	Differentiating environmental concern in the context of psychological adaption to climate change	GLOBAL ENVIRONMENTAL CHANGE-HUMAN AND POLICY DIMENSIONS	10.1016/j.gloenvcha.2017.11.012	WoS	FALSE
752	Cooper, Sarah; Hutchings, Paul; Butterworth, John; Joseph, Solome; Kebede, Abinet; Parker, Alison; Terefe, Bethel; Van Koppen, Barbara	2019	Environmental associated emotional distress and the dangers of climate change for pastoralist mental health	GLOBAL ENVIRONMENTAL CHANGE-HUMAN AND POLICY DIMENSIONS	10.1016/j.gloenvcha.2019.101994	WoS	FALSE
753	Roe J, Aspinall P.	2011	The restorative benefits of walking in urban and rural settings in adults with good and poor mental health	Health Place	10.1016/j.healthplace.2010.09.003	PubMed	FALSE
754	Roe, Jenny; Aspinall, Peter	2011	The restorative benefits of walking in urban and rural settings in adults with good and poor mental health	HEALTH & PLACE	10.1016/j.healthplace.2010.09.003	WoS	TRUE
755	Jadhav S, Barua M.	2012	The Elephant Vanishes: impact of human-elephant conflict on people's wellbeing	Health Place	10.1016/j.healthplace.2012.06.019	PubMed	FALSE
756	Jadhav, Sushrut; Barua, Maan	2012	The Elephant Vanishes: Impact of human-elephant conflict on people's wellbeing	HEALTH & PLACE	10.1016/j.healthplace.2012.06.019	WoS	TRUE
757	White MP, Alcock I, Wheeler BW, Depledge MH.	2013	Coastal proximity, health and well-being: results from a longitudinal panel survey	Health Place	10.1016/j.healthplace.2013.05.006	PubMed	FALSE
758	White, Mathew P.; Alcock, Ian; Wheeler, Benedict W.; Depledge, Michael H.	2013	Coastal proximity, health and well-being: Results from a longitudinal panel survey	HEALTH & PLACE	10.1016/j.healthplace.2013.05.006	WoS	TRUE
759	Brewster L.	2014	The public library as therapeutic landscape: a qualitative case study	Health Place	10.1016/j.healthplace.2013.12.015	PubMed	FALSE
760	Brewster, Liz	2014	The public library as therapeutic landscape: A qualitative case study	HEALTH & PLACE	10.1016/j.healthplace.2013.12.015	WoS	TRUE
761	Thomas, Felicity	2015	The role of natural environments within women's everyday health and wellbeing in Copenhagen, Denmark	HEALTH & PLACE	10.1016/j.healthplace.2014.11.005	WoS	FALSE
762	Lengen C.	2015	The effects of colours, shapes and boundaries of landscapes on perception, emotion and mentalising processes promoting health and well-being	Health Place	10.1016/j.healthplace.2015.05.016	PubMed	FALSE
763	Lengen, Charis	2015	The effects of colours, shapes and boundaries of landscapes on perception, emotion and mentalising processes promoting health and well-being	HEALTH & PLACE	10.1016/j.healthplace.2015.05.016	WoS	TRUE
764	Windhorst E, Williams A.	2015	"It's like a different world": Natural places, post-secondary students, and mental health	Health Place	10.1016/j.healthplace.2015.06.002	PubMed	FALSE
765	Windhorst, Eric; Williams, Allison	2015	It's like a different world: Natural places, post-secondary students, and mental health	HEALTH & PLACE	10.1016/j.healthplace.2015.06.002	WoS	TRUE
766	van den Berg M, van Poppel M, van Kamp I, Andrusaityte S, Balseviciene B, Cirach M, Danileviciute A, Ellis N, Hurst G, Masterson D, Smith G, Triguero-Mas M, Uzdanaviciute I, de Wit P, van Mechelen W, Gidlow C, Grazuleviciene R, Nieuwenhuijsen MJ, Kruize H, Maas J.	2016	Visiting green space is associated with mental health and vitality: A cross-sectional study in four european cities	Health Place	10.1016/j.healthplace.2016.01.003	PubMed	FALSE
767	van den Berg, Magdalena; van Poppel, Mireille; van Kamp, Irene; Andrusaityte, Sandra; Balseviciene, Birute; Cirach, Marta; Danileviciute, Asta; Ellis, Naomi; Hurst, Gemma; Masterson, Daniel; Smith, Graham; Triguero-Mas, Margarita; Uzdanaviciute, Inga; de Wit, Puck; van Mechelen, Willem; Gidlow, Christopher; Grazuleviciene, Regina; Nieuwenhuijsen, Mark J.; Kruize, Hanneke; Maas, Jolanda	2016	Visiting green space is associated with mental health and vitality: A cross-sectional study in four european cities	HEALTH & PLACE	10.1016/j.healthplace.2016.01.003	WoS	TRUE
768	Sampson N, Nassauer J, Schulz A, Hurd K, Dorman C, Ligon K.	2017	Landscape care of urban vacant properties and implications for health and safety: Lessons from photovoice	Health Place	10.1016/j.healthplace.2017.05.017	PubMed	FALSE
769	Sampson, Natalie; Nassauer, Joan; Schulz, Amy; Hurd, Kathleen; Dorman, Cynthia; Ligon, Khalil	2017	Landscape care of urban vacant properties and implications for health and safety: Lessons from photovoice	HEALTH & PLACE	10.1016/j.healthplace.2017.05.017	WoS	TRUE
770	Abraham TH, Koenig CJ, Zamora K, Hill C, Uddo M, Kelly AP, Hamilton MF, Curran GM, Pyne JM, Seal KH.	2017	Situating mental health work in place: Qualitative findings from interviews with Veterans in Southeastern Louisiana and Northern California	Health Place	10.1016/j.healthplace.2017.07.001	PubMed	FALSE
771	Abraham, Traci H.; Koenig, Christopher J.; Zamora, Kara; Hill, Coleen; Uddo, Madeline; Kelly, Adam P.; Hamilton, Michelle F.; Curran, Geoffrey M.; Pyne, Jeffrey M.; Seal, Karen H.	2017	Situating mental health work in place: Qualitative findings from interviews with Veterans in Southeastern Louisiana and Northern California	HEALTH & PLACE	10.1016/j.healthplace.2017.07.001	WoS	TRUE
772	Piat, Myra; Seida, Kimberly; Sabetti, Judith; Padgett, Deborah	2017	(Em) placing recovery: Sites of health and wellness for individuals with serious mental illness in supported housing	HEALTH & PLACE	10.1016/j.healthplace.2017.07.006	WoS	FALSE
773	Sass V, Kravitz-Wirtz N, Karceski SM, Hajat A, Crowder K, Takeuchi D.	2017	The effects of air pollution on individual psychological distress	Health Place	10.1016/j.healthplace.2017.09.006	PubMed	FALSE
774	Sass, Victoria; Kravitz-Wirtz, Nicole; Karceski, Steven M.; Hajat, Anjum; Crowder, Kyle; Takeuchi, David	2017	The effects of air pollution on individual psychological distress	HEALTH & PLACE	10.1016/j.healthplace.2017.09.006	WoS	TRUE
775	Rzotkiewicz A, Pearson AL, Dougherty BV, Shortridge A, Wilson N.	2018	Systematic review of the use of Google Street View in health research: Major themes, strengths, weaknesses and possibilities for future research	Health Place	10.1016/j.healthplace.2018.07.001	PubMed	FALSE
776	Rzotkiewicz, Amanda; Pearson, Amber L.; Dougherty, Benjamin V.; Shortridge, Ashton; Wilson, Nick	2018	Systematic review of the use of Google Street View in health research: Major themes, strengths, weaknesses and possibilities for future research	HEALTH & PLACE	10.1016/j.healthplace.2018.07.001	WoS	TRUE
777	Larson LR, Barger B, Ogletree S, Torquati J, Rosenberg S, Gaither CJ, Bartz JM, Gardner A, Moody E, Schutte A.	2018	Gray space and green space proximity associated with higher anxiety in youth with autism	Health Place	10.1016/j.healthplace.2018.07.006	PubMed	FALSE
778	Larson, Lincoln R.; Barger, Brian; Ogletree, Scott; Torquati, Julia; Rosenberg, Steven; Gaither, Cassandra Johnson; Bartz, Jody Marie; Gardner, Andrew; Moody, Eric; Schutte, Anne	2018	Gray space and green space proximity associated with higher anxiety in youth with autism	HEALTH & PLACE	10.1016/j.healthplace.2018.07.006	WoS	TRUE
779	Burley BA.	2018	Green infrastructure and violence: Do new street trees mitigate violent crime?	Health Place	10.1016/j.healthplace.2018.08.015	PubMed	FALSE
780	Burley, Blair Alexandra	2018	Green infrastructure and violence: Do new street trees mitigate violent crime?	HEALTH & PLACE	10.1016/j.healthplace.2018.08.015	WoS	TRUE
781	Dempsey S, Devine MT, Gillespie T, Lyons S, Nolan A.	2018	Coastal blue space and depression in older adults	Health Place	10.1016/j.healthplace.2018.09.002	PubMed	FALSE
782	Boucher, Marie-Eve; Groleau, Danielle; Whitley, Rob	2019	Recovery from severe mental illness in Quebec: The role of culture and place	HEALTH & PLACE	10.1016/j.healthplace.2019.01.008	WoS	FALSE
783	Lai Y, Kontokosta CE.	2019	The impact of urban street tree species on air quality and respiratory illness: A spatial analysis of large-scale, high-resolution urban data	Health Place	10.1016/j.healthplace.2019.01.016	PubMed	FALSE
784	Kriegel LS.	2019	Stranger support: How former prisoners with mental illnesses navigate the public landscape of reentry	Health Place	10.1016/j.healthplace.2019.01.021	PubMed	FALSE
785	Kriegel, Liat S.	2019	Stranger support: How former prisoners with mental illnesses navigate the public landscape of reentry	HEALTH & PLACE	10.1016/j.healthplace.2019.01.021	WoS	TRUE
786	Signoretta PE, Buffel V, Bracke P.	2019	Mental wellbeing, air pollution and the ecological state	Health Place	10.1016/j.healthplace.2019.03.003	PubMed	FALSE
787	Signoretta, Paola E.; Buffel, Veerle; Bracke, Piet	2019	Mental wellbeing, air pollution and the ecological state	HEALTH & PLACE	10.1016/j.healthplace.2019.03.003	WoS	TRUE
788	Block K, Molyneaux R, Gibbs L, Alkemade N, Baker E, MacDougall C, Ireton G, Forbes D.	2019	The role of the natural environment in disaster recovery: "We live here because we love the bush"	Health Place	10.1016/j.healthplace.2019.03.007	PubMed	FALSE
789	Block, Karen; Molyneaux, Robyn; Gibbs, Lisa; Alkemade, Nathan; Baker, Elyse; MacDougall, Colin; Ireton, Greg; Forbes, David	2019	The role of the natural environment in disaster recovery: "We live here because we love the bush"	HEALTH & PLACE	10.1016/j.healthplace.2019.03.007	WoS	TRUE
790	Mueller MAE, Flouri E, Kokosi T.	2019	The role of the physical environment in adolescent mental health	Health Place	10.1016/j.healthplace.2019.102153	PubMed	FALSE
791	Mueller, Marie A. E.; Flouri, Eirini; Kokosi, Theodora	2019	The role of the physical environment in adolescent mental health	HEALTH & PLACE	10.1016/j.healthplace.2019.102153	WoS	TRUE
792	Midouhas E, Kokosi T, Flouri E.	2019	Neighbourhood-level air pollution and greenspace and inflammation in adults	Health Place	10.1016/j.healthplace.2019.102167	PubMed	FALSE
793	Midouhas, Emily; Kokosi, Theodora; Flouri, Eirini	2019	Neighbourhood-level air pollution and greenspace and inflammation in adults	HEALTH & PLACE	10.1016/j.healthplace.2019.102167	WoS	TRUE
794	Yang T, Barnett R, Fan Y, Li L.	2019	The effect of urban green space on uncertainty stress and life stress: A nationwide study of university students in China	Health Place	10.1016/j.healthplace.2019.102199	PubMed	FALSE
795	Yang, Tingzhong; Barnett, Ross; Fan, Yafeng; Li, Lu	2019	The effect of urban green space on uncertainty stress and life stress: A nationwide study of university students in China	HEALTH & PLACE	10.1016/j.healthplace.2019.102199	WoS	TRUE
796	Garrett JK, Clitherow TJ, White MP, Wheeler BW, Fleming LE.	2019	Coastal proximity and mental health among urban adults in England: The moderating effect of household income	Health Place	10.1016/j.healthplace.2019.102200	PubMed	FALSE
797	Garrett, Joanne K.; Clitherow, Theodore J.; White, Mathew P.; Wheeler, Benedict W.; Fleming, Lora E.	2019	Coastal proximity and mental health among urban adults in England: The moderating effect of household income	HEALTH & PLACE	10.1016/j.healthplace.2019.102200	WoS	TRUE
798	Costello L, McDermott ML, Patel P, Dare J.	2019	'A lot better than medicine' - Self-organised ocean swimming groups as facilitators for healthy ageing	Health Place	10.1016/j.healthplace.2019.102212	PubMed	FALSE
799	Costello, Leesa; McDermott, Marie-Louise; Patel, Purvi; Dare, Julie	2019	'A lot better than medicine' - Self-organised ocean swimming groups as facilitators for healthy ageing	HEALTH & PLACE	10.1016/j.healthplace.2019.102212	WoS	TRUE
800	Heaslip, Vanessa; Vahdaninia, Mariam; Hind, Martin; Darvill, Tim; Staelens, Yvette; O'Donoghue, Daniel; Drysdale, Laura; Lunt, Sara; Hogg, Chris; Allfrey, Martin; Clifton, Briony; Sutcliffe, Toby	2020	Locating oneself in the past to influence the present: Impacts of Neolithic landscapes on mental health well-being	HEALTH & PLACE	10.1016/j.healthplace.2019.102273	WoS	FALSE
801	Birch J, Rishbeth C, Payne SR.	2020	Nature doesn't judge you - how urban nature supports young people's mental health and wellbeing in a diverse UK city	Health Place	10.1016/j.healthplace.2020.102296	PubMed	FALSE
802	Birch, Jo; Rishbeth, Clare; Payne, Sarah R.	2020	Nature doesn't judge you - how urban nature supports young people's mental health and wellbeing in a diverse UK city	HEALTH & PLACE	10.1016/j.healthplace.2020.102296	WoS	TRUE
803	Mmako NJ, Courtney-Pratt H, Marsh P.	2020	Green spaces, dementia and a meaningful life in the community: A mixed studies review	Health Place	10.1016/j.healthplace.2020.102344	PubMed	FALSE
804	Mmako, Nkolika Janet; Courtney-Pratt, Helen; Marsh, Pauline	2020	Green spaces, dementia and a meaningful life in the community: A mixed studies review	HEALTH & PLACE	10.1016/j.healthplace.2020.102344	WoS	TRUE
805	Chen Y, Yuan Y.	2020	The neighborhood effect of exposure to blue space on elderly individuals' mental health: A case study in Guangzhou, China	Health Place	10.1016/j.healthplace.2020.102348	PubMed	FALSE
806	Chen, Yujie; Yuan, Yuan	2020	The neighborhood effect of exposure to blue space on elderly individuals' mental health: A case study in Guangzhou, China	HEALTH & PLACE	10.1016/j.healthplace.2020.102348	WoS	TRUE
807	Watson C, Nieuwenhuijsen MJ, Triguero-Mas M, Cirach M, Maas J, Gidlow C, Kruize H, Andrusaityte S, Grazuleviciene R, Zijlema WL.	2020	The association between natural outdoor environments and common somatic symptoms	Health Place	10.1016/j.healthplace.2020.102381	PubMed	FALSE
808	Biddle L, Miners A, Bozorgmehr K.	2019	Cost-utility of screening for depression among asylum seekers: a modelling study in Germany	Health Policy	10.1016/j.healthpol.2019.05.011	PubMed	FALSE
809	Biddle, Louise; Miners, Alec; Bozorgmehr, Kayvan	2019	Cost-utility of screening for depression among asylum seekers: a modelling study in Germany	HEALTH POLICY	10.1016/j.healthpol.2019.05.011	WoS	TRUE
810	Rapoport L, Poole DN, Kazanas K, Mourtzaki M, Bump JB.	2020	Distal determinants of mental health conditions (MHC) for asylum-seeking children in Greece: A health system enhancement study	Health Policy	10.1016/j.healthpol.2020.07.006	PubMed	FALSE
811	Koehlmoos TP, Anwar S, Cravioto A.	2011	Global health: chronic diseases and other emergent issues in global health	Infect Dis Clin North Am	10.1016/j.idc.2011.05.008	PubMed	FALSE
812	Koehlmoos, Tracey Perez; Anwar, Shahela; Cravioto, Alejandro	2011	Global Health: Chronic Diseases and Other Emergent Issues in Global Health	INFECTIOUS DISEASE CLINICS OF NORTH AMERICA	10.1016/j.idc.2011.05.008	WoS	TRUE
813	Marques, Tatiana Milena; Cryan, John F.; Shanahan, Fergus; Fitzgerald, Gerald F.; Ross, R. Paul; Dinan, Timothy G.; Stanton, Catherine	2014	Gut microbiota modulation and implications for host health: Dietary strategies to influence the gut-brain axis	INNOVATIVE FOOD SCIENCE & EMERGING TECHNOLOGIES	10.1016/j.ifset.2013.10.016	WoS	FALSE
814	Akhter, Syeda Rezwana; Sarkar, Ratan Kumar; Dutta, Mitul; Khanom, Roxana; Akter, Nasima; Chowdhury, Md Raihan; Sultan, Mainus	2015	Issues with families and children in a disaster context: A qualitative perspective from rural Bangladesh	INTERNATIONAL JOURNAL OF DISASTER RISK REDUCTION	10.1016/j.ijdrr.2015.07.011	WoS	FALSE
815	Akhter, Syeda Rezwana; Sarkar, Ratan Kumar; Dutta, Mitul; Khanoma, Roxana; Akter, Nasima; Chowdhury, Md. Raihan; Sultan, Mainus	2015	Issues with families and children in A qualitative perspective from rural Bangladesh (Reprinted from International Journal of Disater Risk Reduction, vol 13, pg 313-323)	INTERNATIONAL JOURNAL OF DISASTER RISK REDUCTION	10.1016/j.ijdrr.2015.10.009	WoS	FALSE
816	Nicolay, Michael; Brown, Lisa M.; Johns, Raine; Ialynytchev, Anna	2016	A study of heat related illness preparedness in homeless veterans	INTERNATIONAL JOURNAL OF DISASTER RISK REDUCTION	10.1016/j.ijdrr.2016.05.009	WoS	FALSE
817	Akerkar, Supriya; Fordham, Maureen	2017	Gender, place and mental health recovery in disasters: Addressing issues of equality and difference	INTERNATIONAL JOURNAL OF DISASTER RISK REDUCTION	10.1016/j.ijdrr.2017.03.014	WoS	FALSE
818	Tischer CG, Heinrich J.	2013	Exposure assessment of residential mould, fungi and microbial components in relation to children's health: achievements and challenges	Int J Hyg Environ Health	10.1016/j.ijheh.2012.05.002	PubMed	FALSE
819	Tischer, Christina G.; Heinrich, Joachim	2013	Exposure assessment of residential mould, fungi and microbial components in relation to children's health: Achievements and challenges	INTERNATIONAL JOURNAL OF HYGIENE AND ENVIRONMENTAL HEALTH	10.1016/j.ijheh.2012.05.002	WoS	TRUE
820	Tzivian L, Winkler A, Dlugaj M, Schikowski T, Vossoughi M, Fuks K, Weinmayr G, Hoffmann B.	2015	Effect of long-term outdoor air pollution and noise on cognitive and psychological functions in adults	Int J Hyg Environ Health	10.1016/j.ijheh.2014.08.002	PubMed	FALSE
821	Tzivian, Lilian; Winkler, Angela; Dlugaj, Martha; Schikowski, Tamara; Vossoughi, Mohammad; Fuks, Kateryna; Weinrnayr, Gudrun; Hoffmann, Barbara	2015	Effect of long-term outdoor air pollution and noise on cognitive and psychological functions in adults	INTERNATIONAL JOURNAL OF HYGIENE AND ENVIRONMENTAL HEALTH	10.1016/j.ijheh.2014.08.002	WoS	TRUE
822	Zijlema WL, Wolf K, Emeny R, Ladwig KH, Peters A, Kongsg?�rd H, Hveem K, Kval?�y K, Yli-Tuomi T, Partonen T, Lanki T, Eeftens M, de Hoogh K, Brunekreef B; BioSHaRE, Stolk RP, Rosmalen JG.	2016	The association of air pollution and depressed mood in 70,928 individuals from four European cohorts	Int J Hyg Environ Health	10.1016/j.ijheh.2015.11.006	PubMed	FALSE
823	Vert C, S?�nchez-Benavides G, Mart?�nez D, Gotsens X, Gramunt N, Cirach M, Molinuevo JL, Sunyer J, Nieuwenhuijsen MJ, Crous-Bou M, Gascon M.	2017	Effect of long-term exposure to air pollution on anxiety and depression in adults: A cross-sectional study	Int J Hyg Environ Health	10.1016/j.ijheh.2017.06.009	PubMed	FALSE
824	Vert, Cristina; Sanchez-Benavides, Gonzalo; Martinez, David; Gotsens, Xavier; Gramunt, Nina; Cirach, Marta; Luis Molinuevo, Jose; Sunyer, Jordi; Nieuwenhuijsen, Mark J.; Crous-Bou, Marta; Gascon, Mireia	2017	Effect of long-term exposure to air pollution on anxiety and depression in adults: A cross-sectional study	INTERNATIONAL JOURNAL OF HYGIENE AND ENVIRONMENTAL HEALTH	10.1016/j.ijheh.2017.06.009	WoS	TRUE
825	Gascon, Mireia; Zijlema, Wilma; Vert, Cristina; White, Mathew P.; Nieuwenhuijsen, Mark J.	2017	Outdoor blue spaces, human health and well-being: A systematic review of quantitative studies	INTERNATIONAL JOURNAL OF HYGIENE AND ENVIRONMENTAL HEALTH	10.1016/j.ijheh.2017.08.004	WoS	FALSE
826	Gonzalez-Casanova I, Stein AD, Barraza-Villarreal A, Feregrino RG, DiGirolamo A, Hernandez-Cadena L, Rivera JA, Romieu I, Ramakrishnan U.	2018	Prenatal exposure to environmental pollutants and child development trajectories through 7 years	Int J Hyg Environ Health	10.1016/j.ijheh.2018.04.004	PubMed	FALSE
827	Gonzalez-Casanova, Ines; Stein, Aryeh D.; Barraza-Villarreal, Albino; Garcia Feregrino, Raquel; DiGirolamo, Ann; Hernandez-Cadena, Leticia; Rivera, Juan A.; Romieu, Isabelle; Ramakrishnan, Usha	2018	Prenatal exposure to environmental pollutants and child development trajectories through 7 years	INTERNATIONAL JOURNAL OF HYGIENE AND ENVIRONMENTAL HEALTH	10.1016/j.ijheh.2018.04.004	WoS	TRUE
828	Negev M, Teschner N, Rosenthal A, Levine H, Lew-Levy C, Davidovitch N.	2019	Adaptation of health systems to climate-related migration in Sub-Saharan Africa: Closing the gap	Int J Hyg Environ Health	10.1016/j.ijheh.2018.10.004	PubMed	FALSE
829	Negev, Maya; Teschner, Na'ama; Rosenthal, Anat; Levine, Hagai; Lew-Levy, Clara; Davidovitch, Nadav	2019	Adaptation of health systems to climate-related migration in Sub-Saharan Africa: Closing the gap	INTERNATIONAL JOURNAL OF HYGIENE AND ENVIRONMENTAL HEALTH	10.1016/j.ijheh.2018.10.004	WoS	TRUE
830	Yue JL, Liu H, Li H, Liu JJ, Hu YH, Wang J, Lu L, Wang F.	2020	Association between ambient particulate matter and hospitalization for anxiety in China: A multicity case-crossover study	Int J Hyg Environ Health	10.1016/j.ijheh.2019.09.006	PubMed	FALSE
831	Yue, Jing-Li; Liu, Hui; Li, Hui; Liu, Jia-Jia; Hu, Yong-Hua; Wang, Jing; Lu, Lin; Wang, Feng	2020	Association between ambient particulate matter and hospitalization for anxiety in China: A multicity case-crossover study	INTERNATIONAL JOURNAL OF HYGIENE AND ENVIRONMENTAL HEALTH	10.1016/j.ijheh.2019.09.006	WoS	TRUE
832	Aerts R, Stas M, Vanlessen N, Hendrickx M, Bruffaerts N, Hoebeke L, Dendoncker N, Dujardin S, Saenen ND, Van Nieuwenhuyse A, Aerts JM, Van Orshoven J, Nawrot TS, Somers B.	2020	Residential green space and seasonal distress in a cohort of tree pollen allergy patients	Int J Hyg Environ Health	10.1016/j.ijheh.2019.10.004	PubMed	FALSE
833	O'Brien AJ, Thom K.	2014	Police use of TASER devices in mental health emergencies: a review	Int J Law Psychiatry	10.1016/j.ijlp.2014.02.014	PubMed	FALSE
834	O'Brien, Anthony J.; Thom, Katey	2014	Police use of TASER devices in mental health emergencies: A review	INTERNATIONAL JOURNAL OF LAW AND PSYCHIATRY	10.1016/j.ijlp.2014.02.014	WoS	TRUE
835	Gwee K.	2017	Psychology and psychiatry in Singapore courts: A baseline survey of the mental health landscape in the legal arena	Int J Law Psychiatry	10.1016/j.ijlp.2017.03.005	PubMed	FALSE
836	Gwee, Kenji	2017	Psychology and psychiatry in Singapore courts: A baseline survey of the mental health landscape in the legal arena	INTERNATIONAL JOURNAL OF LAW AND PSYCHIATRY	10.1016/j.ijlp.2017.03.005	WoS	TRUE
837	Regehr C, Glancy GD, Carter A, Ramshaw L.	2017	A comprehensive approach to managing threats of violence on a university or college campus	Int J Law Psychiatry	10.1016/j.ijlp.2017.06.009	PubMed	FALSE
838	Regehr, Cheryl; Glancy, Graham D.; Carter, Andrea; Ramshaw, Lisa	2017	A comprehensive approach to managing threats of violence on a university or college campus	INTERNATIONAL JOURNAL OF LAW AND PSYCHIATRY	10.1016/j.ijlp.2017.06.009	WoS	TRUE
839	Parker L, Halter V, Karliychuk T, Grundy Q.	2019	How private is your mental health app data? An empirical study of mental health app privacy policies and practices	Int J Law Psychiatry	10.1016/j.ijlp.2019.04.002	PubMed	FALSE
840	Parker, Lisa; Halter, Vanessa; Karliychuk, Tanya; Grundy, Quinn	2019	How private is your mental health app data? An empirical study of mental health app privacy policies and practices	INTERNATIONAL JOURNAL OF LAW AND PSYCHIATRY	10.1016/j.ijlp.2019.04.002	WoS	TRUE
841	van Steden R.	2020	Governing through care: A qualitative assessment of team play between police and nurses for people with mental illness	Int J Law Psychiatry	10.1016/j.ijlp.2019.101532	PubMed	FALSE
842	Morel D, Yu KC, Liu-Ferrara A, Caceres-Suriel AJ, Kurtz SG, Tabak YP.	2020	Predicting hospital readmission in patients with mental or substance use disorders: A machine learning approach	Int J Med Inform	10.1016/j.ijmedinf.2020.104136	PubMed	FALSE
843	Bowers, Len; Dack, Charlotte; Gul, Noreen; Thomas, Ben; James, Karen	2011	Learning from prevented suicide in psychiatric inpatient care: An analysis of data from the National Patient Safety Agency	INTERNATIONAL JOURNAL OF NURSING STUDIES	10.1016/j.ijnurstu.2011.05.008	WoS	FALSE
844	Brown B, Rutherford P, Crawford P.	2015	The role of noise in clinical environments with particular reference to mental health care: A narrative review	Int J Nurs Stud	10.1016/j.ijnurstu.2015.04.020	PubMed	FALSE
845	Lous J, Glenn Lauritsen MB.	2018	Comparison of the Reynell Developmental Language Scale II and the Galker test of word-recognition-in-noise in Danish day-care children	Int J Pediatr Otorhinolaryngol	10.1016/j.ijporl.2018.03.036	PubMed	FALSE
846	Lous, Jorgen; Lauritsen, Maj-Britt Glenn	2018	Comparison of the Reynell Developmental Language Scale II and the Galker test of word-recognition-in-noise in Danish day-care children	INTERNATIONAL JOURNAL OF PEDIATRIC OTORHINOLARYNGOLOGY	10.1016/j.ijporl.2018.03.036	WoS	TRUE
847	Huttunen K, Erixon E, L?�fkvist U, M?�ki-Torkko E.	2019	The impact of permanent early-onset unilateral hearing impairment in children - A systematic review	Int J Pediatr Otorhinolaryngol	10.1016/j.ijporl.2019.02.029	PubMed	FALSE
848	Huttunen, Kerttu; Erixon, Elsa; Lofkvist, Ulrika; Maki-Torkko, Elina	2019	The impact of permanent early-onset unilateral hearing impairment in children - A systematic review	INTERNATIONAL JOURNAL OF PEDIATRIC OTORHINOLARYNGOLOGY	10.1016/j.ijporl.2019.02.029	WoS	TRUE
849	van den Heuvel MI, Otte RA, Braeken MA, Winkler I, Kushnerenko E, Van den Bergh BR.	2015	Differences between human auditory event-related potentials (AERPs) measured at 2 and 4 months after birth	Int J Psychophysiol	10.1016/j.ijpsycho.2015.04.003	PubMed	FALSE
850	van den Heuvel, Marion I.; Otte, Renee A.; Braeken, Marijke A. K. A.; Winkler, Istvan; Kushnerenko, Elena; Van den Bergh, Bea R. H.	2015	Differences between human auditory event-related potentials (AERPs) measured at 2 and 4 months after birth	INTERNATIONAL JOURNAL OF PSYCHOPHYSIOLOGY	10.1016/j.ijpsycho.2015.04.003	WoS	TRUE
851	Perkins ER, Yancey JR, Drislane LE, Venables NC, Balsis S, Patrick CJ.	2017	Methodological issues in the use of individual brain measures to index trait liabilities: The example of noise-probe P3	Int J Psychophysiol	10.1016/j.ijpsycho.2016.11.012	PubMed	FALSE
852	Perkins, Emily R.; Yancey, James R.; Drislane, Laura E.; Venables, Noah C.; Balsis, Steve; Patrick, Christopher J.	2017	Methodological issues in the use of individual brain measures to index trait liabilities: The example of noise-probe P3	INTERNATIONAL JOURNAL OF PSYCHOPHYSIOLOGY	10.1016/j.ijpsycho.2016.11.012	WoS	TRUE
853	Sperry SH, Kwapil TR, Eddington KM, Silvia PJ.	2018	Psychopathology, everyday behaviors, and autonomic activity in daily life: An ambulatory impedance cardiography study of depression, anxiety, and hypomanic traits	Int J Psychophysiol	10.1016/j.ijpsycho.2018.04.008	PubMed	FALSE
854	Hayashi M, Matsuzawa T.	2017	Mother-infant interactions in captive and wild chimpanzees	Infant Behav Dev	10.1016/j.infbeh.2016.11.008	PubMed	FALSE
855	Hayashi, Misato; Matsuzawa, Tetsuro	2017	Mother-infant interactions in captive and wild chimpanzees	INFANT BEHAVIOR & DEVELOPMENT	10.1016/j.infbeh.2016.11.008	WoS	TRUE
856	Austin MP, Christl B, McMahon C, Kildea S, Reilly N, Yin C, Simcock G, Elgbeili G, Laplante DP, King S.	2017	Moderating effects of maternal emotional availability on language and cognitive development in toddlers of mothers exposed to a natural disaster in pregnancy: The QF2011 Queensland Flood Study	Infant Behav Dev	10.1016/j.infbeh.2017.10.005	PubMed	FALSE
857	Liang, Yunji; Zheng, Xiaolong; Zeng, Daniel D.	2019	A survey on big data-driven digital phenotyping of mental health	INFORMATION FUSION	10.1016/j.inffus.2019.04.001	WoS	FALSE
858	Qi, Jun; Yang, Po; Newcombe, Lee; Peng, Xiyang; Yang, Yun; Zhao, Zhong	2020	An overview of data fusion techniques for Internet of Things enabled physical activity recognition and measure	INFORMATION FUSION	10.1016/j.inffus.2019.09.002	WoS	FALSE
859	Wasiak J, Mahar P, Lee S, Paul E, Spinks A, Pfitzer B, Cleland H, Gabbe B.	2013	12-month generic health status and psychological distress outcomes following an Australian natural disaster experience: 2009 Black Saturday Wildfires	Injury	10.1016/j.injury.2012.08.060	PubMed	FALSE
860	Wasiak, J.; Mahar, P.; Lee, S.; Paul, E.; Spinks, A.; Pfitzer, B.; Cleland, H.; Gabbe, B.	2013	12-Month generic health status and psychological distress outcomes following an Australian natural disaster experience: 2009 Black Saturday Wildfires	INJURY-INTERNATIONAL JOURNAL OF THE CARE OF THE INJURED	10.1016/j.injury.2012.08.060	WoS	TRUE
861	Pumariega AJ, Rothe E, Mian A, Carlisle L, Toppelberg C, Harris T, Gogineni RR, Webb S, Smith J; American Academy of Child and Adolescent Psychiatry (AACAP) Committee on Quality Issues (CQI).	2013	Practice parameter for cultural competence in child and adolescent psychiatric practice	J Am Acad Child Adolesc Psychiatry	10.1016/j.jaac.2013.06.019	PubMed	FALSE
862	Pumariega, Andres J.; Rothe, Eugenio; Mian, Ayesha; Carlisle, Lee; Toppelberq, Claudio; Harris, Toi; Gogineni, Rama Rao; Webb, Sala; Smith, Jacqueline	2013	Practice Parameter for Cultural Competence in Child and Adolescent Psychiatric Practice	JOURNAL OF THE AMERICAN ACADEMY OF CHILD AND ADOLESCENT PSYCHIATRY	10.1016/j.jaac.2013.06.019	WoS	TRUE
863	Lange AM, Daley D, Frydenberg M, Houmann T, Kristensen LJ, Rask C, Sonuga-Barke E, S?�ndergaard-Baden S, Udupi A, Thomsen PH.	2018	Parent Training for Preschool ADHD in Routine, Specialist Care: A Randomized Controlled Trial	J Am Acad Child Adolesc Psychiatry	10.1016/j.jaac.2018.04.014	PubMed	FALSE
864	Wade M, Fox NA, Zeanah CH, Nelson CA, Drury SS.	2020	Telomere Length and Psychopathology: Specificity and Direction of Effects Within the Bucharest Early Intervention Project	J Am Acad Child Adolesc Psychiatry	10.1016/j.jaac.2019.02.013	PubMed	FALSE
865	West CE, Renz H, Jenmalm MC, Kozyrskyj AL, Allen KJ, Vuillermin P, Prescott SL; in-FLAME Microbiome Interest Group.	2015	The gut microbiota and inflammatory noncommunicable diseases: associations and potentials for gut microbiota therapies	J Allergy Clin Immunol	10.1016/j.jaci.2014.11.012	PubMed	FALSE
866	West, Christina E.; Renz, Harald; Jenmalm, Maria C.; Kozyrskyj, Anita L.; Allen, Katrina J.; Vuillermin, Peter; Prescott, Susan L.; MacKay, Charles; Salminen, Seppo; Wong, Gary; Sinn, John; Stokholm, Jakob; Bisgaard, Hans; Pawankar, Ruby; Noakes, Paul; Kesper, Doerthe; Tulic, Meri	2015	The gut microbiota and inflammatory noncommunicable diseases: Associations and potentials for gut microbiota therapies	JOURNAL OF ALLERGY AND CLINICAL IMMUNOLOGY	10.1016/j.jaci.2014.11.012	WoS	TRUE
867	Joensuu M, V?�?�n?�nen A, Koskinen A, Kivim?�ki M, Virtanen M, Vahtera J.	2010	Psychosocial work environment and hospital admissions due to mental disorders: a 15-year prospective study of industrial employees	J Affect Disord	10.1016/j.jad.2009.10.025	PubMed	FALSE
868	Joensuu, Matti; Vaananen, An; Koskinen, Aki; Kivimaki, Mika; Virtanen, Marianna; Vahtera, Jussi	2010	Psychosocial work environment and hospital admissions due to mental disorders: A 15-year prospective study of industrial employees	JOURNAL OF AFFECTIVE DISORDERS	10.1016/j.jad.2009.10.025	WoS	TRUE
869	Batterham PJ, Christensen H.	2012	Longitudinal risk profiling for suicidal thoughts and behaviours in a community cohort using decision trees	J Affect Disord	10.1016/j.jad.2012.05.021	PubMed	FALSE
870	Batterham, Philip J.; Christensen, Helen	2012	Longitudinal risk profiling for suicidal thoughts and behaviours in a community cohort using decision trees	JOURNAL OF AFFECTIVE DISORDERS	10.1016/j.jad.2012.05.021	WoS	TRUE
871	K?�lves K, K?�lves KE, De Leo D.	2013	Natural disasters and suicidal behaviours: a systematic literature review	J Affect Disord	10.1016/j.jad.2012.07.037	PubMed	FALSE
872	Batterham PJ, Calear AL, Sunderland M, Carragher N, Christensen H, Mackinnon AJ.	2013	Hierarchical screening for multiple mental disorders	J Affect Disord	10.1016/j.jad.2013.05.085	PubMed	FALSE
873	Kisely S, Sawyer E, Siskind D, Lalloo R.	2016	The oral health of people with anxiety and depressive disorders - a systematic review and meta-analysis	J Affect Disord	10.1016/j.jad.2016.04.040	PubMed	FALSE
874	Kisely, Steve; Sawyer, Emily; Siskind, Dan; Lalloo, Ratilal	2016	The oral health of people with anxiety and depressive disorders a systematic review and meta-analysis	JOURNAL OF AFFECTIVE DISORDERS	10.1016/j.jad.2016.04.040	WoS	TRUE
875	Beecher ME, Eggett D, Erekson D, Rees LB, Bingham J, Klundt J, Bailey RJ, Ripplinger C, Kirchhoefer J, Gibson R, Griner D, Cox JC, Boardman RD.	2016	Sunshine on my shoulders: Weather, pollution, and emotional distress	J Affect Disord	10.1016/j.jad.2016.07.021	PubMed	FALSE
876	Beecher, Mark E.; Eggett, Dennis; Erekson, Davey; Rees, Lawrence B.; Bingham, Jennie; Klundt, Jared; Bailey, Russell J.; Ripplinger, Clark; Kirchhoefer, Jessica; Gibson, Robert; Griner, Derek; Cox, Jonathan C.; Boardman, R. D.	2016	Sunshine on my shoulders: Weather, pollution, and emotional distress	JOURNAL OF AFFECTIVE DISORDERS	10.1016/j.jad.2016.07.021	WoS	TRUE
877	Delgado-Gomez D, Baca-Garcia E, Aguado D, Courtet P, Lopez-Castroman J.	2016	Computerized Adaptive Test vs. decision trees: Development of a support decision system to identify suicidal behavior	J Affect Disord	10.1016/j.jad.2016.07.032	PubMed	FALSE
878	Min JY, Min KB.	2018	Outdoor light at night and the prevalence of depressive symptoms and suicidal behaviors: A cross-sectional study in a nationally representative sample of Korean adults	J Affect Disord	10.1016/j.jad.2017.10.039	PubMed	FALSE
879	Min, Jin-young; Min, Kyoung-bok	2018	Outdoor light at night and the prevalence of depressive symptoms and suicidal behaviors: A cross-sectional study in a nationally representative sample of Korean adults	JOURNAL OF AFFECTIVE DISORDERS	10.1016/j.jad.2017.10.039	WoS	TRUE
880	Wang R, Liu Y, Xue D, Yao Y, Liu P, Helbich M.	2019	Cross-sectional associations between long-term exposure to particulate matter and depression in China: The mediating effects of sunlight, physical activity, and neighborly reciprocity	J Affect Disord	10.1016/j.jad.2019.02.007	PubMed	FALSE
881	Wang Ruoyu; Liu Ye; Xue Desheng; Yao Yao; Liu Penghua; Helbich, Marco	2019	Cross-sectional associations between long-term exposure to particulate matter and depression in China: The mediating effects of sunlight, physical activity, and neighborly reciprocity	JOURNAL OF AFFECTIVE DISORDERS	10.1016/j.jad.2019.02.007	WoS	TRUE
882	Nugent N, Gaston SA, Perry J, Rung AL, Trapido EJ, Peters ES.	2019	PTSD symptom profiles among Louisiana women affected by the 2010 Deepwater Horizon Oil Spill: A latent profile analysis	J Affect Disord	10.1016/j.jad.2019.03.018	PubMed	FALSE
883	Nugent, Nicole; Gaston, Symielle A.; Perry, Jacqueline; Rung, Ariane L.; Trapido, Edward J.; Peters, Edward S.	2019	PTSD symptom profiles among Louisiana women affected by the 2010 Deepwater Horizon Oil Spill: A latent profile analysis	JOURNAL OF AFFECTIVE DISORDERS	10.1016/j.jad.2019.03.018	WoS	TRUE
884	Simcock G, Cobham VE, Laplante DP, Elgbeili G, Gruber R, Kildea S, King S.	2019	A cross-lagged panel analysis of children's sleep, attention, and mood in a prenatally stressed cohort: The QF2011 Queensland flood study	J Affect Disord	10.1016/j.jad.2019.05.041	PubMed	FALSE
885	Bistricky SL, Long LJ, Lai BS, Gallagher MW, Kanenberg H, Elkins SR, Harper KL, Short MB.	2019	Surviving the storm: Avoidant coping, helping behavior, resilience and affective symptoms around a major hurricane-flood	J Affect Disord	10.1016/j.jad.2019.07.044	PubMed	FALSE
886	Bistricky, Steven L.; Long, Laura J.; Lai, Betty S.; Gallagher, Matthew W.; Kanenberg, Heather; Elkins, Sara R.; Harper, Kristina L.; Short, Mary B.	2019	Surviving the storm: Avoidant coping, helping behavior, resilience and affective symptoms around a major hurricane-flood	JOURNAL OF AFFECTIVE DISORDERS	10.1016/j.jad.2019.07.044	WoS	TRUE
887	Cui L, Wang C, Wu Z, Peng D, Huang J, Zhang C, Huang J, Hong W, Wang Y, Chen J, Liu T, Rong H, Yang H, Fang Y.	2020	Symptomatology differences of major depression in psychiatric versus general hospitals: A machine learning approach	J Affect Disord	10.1016/j.jad.2019.09.030	PubMed	FALSE
888	Cui, Lvchun; Wang, Chenglei; Wu, Zhiguo; Peng, Daihui; Huang, Jingjing; Zhang, Chen; Huang, Jia; Hong, Wu; Wang, Yong; Chen, Jun; Liu, Tiebang; Rong, Han; Yang, Haichen; Fang, Yiru	2020	Symptomatology differences of major depression in psychiatric versus general hospitals: A machine learning approach	JOURNAL OF AFFECTIVE DISORDERS	10.1016/j.jad.2019.09.030	WoS	TRUE
889	Meinlschmidt G, Tegethoff M, Belardi A, Stalujanis E, Oh M, Jung EK, Kim HC, Yoo SS, Lee JH.	2020	Personalized prediction of smartphone-based psychotherapeutic micro-intervention success using machine learning	J Affect Disord	10.1016/j.jad.2019.11.071	PubMed	FALSE
890	Lipschitz JM, Connolly SL, Miller CJ, Hogan TP, Simon SR, Burdick KE.	2020	Patient interest in mental health mobile app interventions: Demographic and symptom-level differences	J Affect Disord	10.1016/j.jad.2019.11.083	PubMed	FALSE
891	Lipschitz, Jessica M.; Connolly, Samantha L.; Miller, Christopher J.; Hogan, Timothy P.; Simon, Steven R.; Burdick, Katherine E.	2020	Patient interest in mental health mobile app interventions: Demographic and symptom-level differences	JOURNAL OF AFFECTIVE DISORDERS	10.1016/j.jad.2019.11.083	WoS	TRUE
892	Mich?� M, Studerus E, Meyer AH, Gloster AT, Beesdo-Baum K, Wittchen HU, Lieb R.	2020	Prospective prediction of suicide attempts in community adolescents and young adults, using regression methods and machine learning	J Affect Disord	10.1016/j.jad.2019.11.093	PubMed	FALSE
893	Miche, Marcel; Studerus, Erich; Meyer, Andrea Hans; Gloster, Andrew Thomas; Beesdo-Baum, Katja; Wittchen, Hans-Ulrich; Lieb, Roselind	2020	Prospective prediction of suicide attempts in community adolescents and young adults, using regression methods and machine learning	JOURNAL OF AFFECTIVE DISORDERS	10.1016/j.jad.2019.11.093	WoS	TRUE
894	Yim SJ, Lui LMW, Lee Y, Rosenblat JD, Ragguett RM, Park C, Subramaniapillai M, Cao B, Zhou A, Rong C, Lin K, Ho RC, Coles AS, Majeed A, Wong ER, Phan L, Nasri F, McIntyre RS.	2020	The utility of smartphone-based, ecological momentary assessment for depressive symptoms	J Affect Disord	10.1016/j.jad.2020.05.116	PubMed	FALSE
895	Yim, Samantha J.; Lui, Leanna M. W.; Lee, Yena; Rosenblat, Joshua D.; Ragguett, Renee-Marie; Park, Caroline; Subramaniapillai, Mehala; Cao, Bing; Zhou, Aileen; Rong, Carola; Li, Kangguang; Ho, Roger C.; Coles, Alexandria S.; Majeed, Amna; Wong, Elizabeth R.; Phan, Lee; Nasri, Flora; McIntyre, Roger S.	2020	The utility of smartphone-based, ecological momentary assessment for depressive symptoms	JOURNAL OF AFFECTIVE DISORDERS	10.1016/j.jad.2020.05.116	WoS	TRUE
896	Pellegrini L, Maietti E, Rucci P, Casadei G, Maina G, Fineberg NA, Albert U.	2020	Suicide attempts and suicidal ideation in patients with obsessive-compulsive disorder: A systematic review and meta-analysis	J Affect Disord	10.1016/j.jad.2020.07.115	PubMed	FALSE
897	Bezold CP, Banay RF, Coull BA, Hart JE, James P, Kubzansky LD, Missmer SA, Laden F.	2018	The Association Between Natural Environments and Depressive Symptoms in Adolescents Living in the United States	J Adolesc Health	10.1016/j.jadohealth.2017.10.008	PubMed	FALSE
898	Bezold, Carla P.; Banay, Rachel F.; Coull, Brent A.; Hart, Jaime E.; James, Peter; Kubzansky, Laura D.; Missmer, Stacey A.; Laden, Francine	2018	The Association Between Natural Environments and Depressive Symptoms in Adolescents Living in the United States	JOURNAL OF ADOLESCENT HEALTH	10.1016/j.jadohealth.2017.10.008	WoS	TRUE
899	Snyder PJ, Jackson CE, Petersen RC, Khachaturian AS, Kaye J, Albert MS, Weintraub S.	2011	Assessment of cognition in mild cognitive impairment: a comparative study	Alzheimers Dement	10.1016/j.jalz.2011.03.009	PubMed	FALSE
900	Snyder, Peter J.; Jackson, Colleen E.; Petersen, Ronald C.; Khachaturian, Ara S.; Kaye, Jeffrey; Albert, Marilyn S.; Weintraub, Sandra	2011	Assessment of cognition in mild cognitive impairment: A comparative study	ALZHEIMERS & DEMENTIA	10.1016/j.jalz.2011.03.009	WoS	TRUE
901	Proitsi P, Kim M, Whiley L, Simmons A, Sattlecker M, Velayudhan L, Lupton MK, Soininen H, Kloszewska I, Mecocci P, Tsolaki M, Vellas B, Lovestone S, Powell JF, Dobson RJ, Legido-Quigley C.	2017	Association of blood lipids with Alzheimer's disease: A?�comprehensive?�lipidomics analysis	Alzheimers Dement	10.1016/j.jalz.2016.08.003	PubMed	FALSE
902	Del Campo N, Cesari M, Canevelli M, Hoogendijk EO, Lilamand M, Kelaiditi E, Soto ME, Ousset PJ, Weiner MW, Andrieu S, Vellas B; ICTUS and REAL.FR/DSA groups.	2016	Refining Mild-to-Moderate Alzheimer Disease Screening: A Tool for Clinicians	J Am Med Dir Assoc	10.1016/j.jamda.2016.06.005	PubMed	FALSE
903	del Campo, Natalia; Cesari, Matteo; Canevelli, Marco; Hoogendijk, Emiel O.; Lilamand, Matthieu; Kelaiditi, Eirini; Soto, Maria E.; Ousset, Pierre-Jean; Weiner, Michael W.; Andrieu, Sandrine; Vellas, Bruno	2016	Refining Mild-to-Moderate Alzheimer Disease Screening: A Tool for Clinicians	JOURNAL OF THE AMERICAN MEDICAL DIRECTORS ASSOCIATION	10.1016/j.jamda.2016.06.005	WoS	TRUE
904	Melka SE, Lancaster SL, Adams LJ, Howarth EA, Rodriguez BF.	2010	Social anxiety across ethnicity: a confirmatory factor analysis of the FNE and SAD	J Anxiety Disord	10.1016/j.janxdis.2010.04.011	PubMed	FALSE
905	Gibson KE, Barnett J, Haslam N, Kaplan I.	2020	The mental health impacts of climate change: Findings from a Pacific Island atoll nation	J Anxiety Disord	10.1016/j.janxdis.2020.102237	PubMed	FALSE
906	Gibson, K. E.; Barnett, J.; Haslam, N.; Kaplan, I.	2020	The mental health impacts of climate change: Findings from a Pacific Island atoll nation	JOURNAL OF ANXIETY DISORDERS	10.1016/j.janxdis.2020.102237	WoS	TRUE
907	Clayton S.	2020	Climate anxiety: Psychological responses to climate change	J Anxiety Disord	10.1016/j.janxdis.2020.102263	PubMed	FALSE
908	Jenny, Mirjam A.; Pachur, Thorsten; Williams, S. Lloyd; Becker, Eni; Margraf, Juergen	2013	Simple rules for detecting depression	JOURNAL OF APPLIED RESEARCH IN MEMORY AND COGNITION	10.1016/j.jarmac.2013.06.001	WoS	FALSE
909	Clark C, Wellner B, Davis R, Aberdeen J, Hirschman L.	2017	Automatic classification of RDoC positive valence severity with a neural network	J Biomed Inform	10.1016/j.jbi.2017.07.005	PubMed	FALSE
910	Le DV, Montgomery J, Kirkby KC, Scanlan J.	2018	Risk prediction using natural language processing of electronic mental health records in an inpatient forensic psychiatry setting	J Biomed Inform	10.1016/j.jbi.2018.08.007	PubMed	FALSE
911	Joos E, Vansteenwegen D, Hermans D.	2012	Post-acquisition repetitive thought in fear conditioning: an experimental investigation of the effect of CS-US-rehearsal	J Behav Ther Exp Psychiatry	10.1016/j.jbtep.2011.10.011	PubMed	FALSE
912	Collins KRL, Legendre MN, Stritzke WGK, Page AC.	2018	Experimentally-enhanced perceptions of meaning confer resilience to the interpersonal adversity implicated in suicide risk	J Behav Ther Exp Psychiatry	10.1016/j.jbtep.2018.07.004	PubMed	FALSE
913	Collins, Khan R. L.; Legendre, Melissa N.; Stritzke, Werner G. K.; Page, Andrew C.	2018	Experimentally-enhanced perceptions of meaning confer resilience to the interpersonal adversity implicated in suicide risk	JOURNAL OF BEHAVIOR THERAPY AND EXPERIMENTAL PSYCHIATRY	10.1016/j.jbtep.2018.07.004	WoS	TRUE
914	Thompson, Miles; Bond, Frank W.; Lloyd, Joda	2019	Preliminary psychometric properties of the Everyday Psychological Inflexibility Checklist	JOURNAL OF CONTEXTUAL BEHAVIORAL SCIENCE	10.1016/j.jcbs.2018.08.004	WoS	FALSE
915	White, Ross G.; Larkin, Peter; McCluskey, Judith; Lloyd, Joda; McLeod, Hamish J.	2020	The development of the 'Forms of Responding to Self-Critical Thoughts Scale' (FoReST)	JOURNAL OF CONTEXTUAL BEHAVIORAL SCIENCE	10.1016/j.jcbs.2019.11.003	WoS	FALSE
916	Song, Yan; Zhou, Aina; Zhang, Ming; Wang, Hui	2019	Assessing the effects of haze pollution on subjective well-being based on Chinese General Social Survey	JOURNAL OF CLEANER PRODUCTION	10.1016/j.jclepro.2019.07.021	WoS	FALSE
917	Shi, Daqian; Yu, Hongwei	2020	Reevaluating the subjective welfare loss of air pollution	JOURNAL OF CLEANER PRODUCTION	10.1016/j.jclepro.2020.120445	WoS	FALSE
918	Silk JS, Forbes EE, Whalen DJ, Jakubcak JL, Thompson WK, Ryan ND, Axelson DA, Birmaher B, Dahl RE.	2011	Daily emotional dynamics in depressed youth: a cell phone ecological momentary assessment study	J Exp Child Psychol	10.1016/j.jecp.2010.10.007	PubMed	FALSE
919	Yang Y, Merrill EC.	2015	The impact of signal-to-noise ratio on contextual cueing in children and adults	J Exp Child Psychol	10.1016/j.jecp.2014.12.005	PubMed	FALSE
920	Stone MM, Blumberg FC, Blair C, Cancelli AA.	2016	The "EF" in deficiency: Examining the linkages between executive function and the utilization deficiency observed in preschoolers	J Exp Child Psychol	10.1016/j.jecp.2016.07.003	PubMed	FALSE
921	Stone, Mary M.; Blumberg, Fran C.; Blair, Clancy; Cancelli, Anthony A.	2016	The "EF" in deficiency: Examining the linkages between executive function and the utilization deficiency observed in preschoolers	JOURNAL OF EXPERIMENTAL CHILD PSYCHOLOGY	10.1016/j.jecp.2016.07.003	WoS	TRUE
922	Burkhouse KL, Owens M, James K, Gibb BE.	2019	Age differences in electrocortical reactivity to fearful faces following aversive conditioning in youth	J Exp Child Psychol	10.1016/j.jecp.2019.104676	PubMed	FALSE
923	Burkhouse, Katie L.; Owens, Max; James, Kiera; Gibb, Brandon E.	2019	Age differences in electrocortical reactivity to fearful faces following aversive conditioning in youth	JOURNAL OF EXPERIMENTAL CHILD PSYCHOLOGY	10.1016/j.jecp.2019.104676	WoS	TRUE
924	Zhang X, Zhang X, Chen X.	2017	Happiness in the Air: How Does a Dirty Sky Affect Mental Health and Subjective Well-being?	J Environ Econ Manage	10.1016/j.jeem.2017.04.001	PubMed	FALSE
925	Venkataramanan V, Packman AI, Peters DR, Lopez D, McCuskey DJ, McDonald RI, Miller WM, Young SL.	2019	A systematic review of the human health and social well-being outcomes of green infrastructure for stormwater and flood management	J Environ Manage	10.1016/j.jenvman.2019.05.028	PubMed	FALSE
926	Venkataramanan, Vidya; Packman, Aaron, I; Peters, Daniel R.; Lopez, Denise; McCuskey, David J.; McDonald, Robert, I; Miller, William M.; Young, Sera L.	2019	A systematic review of the human health and social well-being outcomes of green infrastructure for stormwater and flood management	JOURNAL OF ENVIRONMENTAL MANAGEMENT	10.1016/j.jenvman.2019.05.028	WoS	TRUE
927	Hipp, J. Aaron; Ogunseitan, Oladele A.	2011	Effect of environmental conditions on perceived psychological restorativeness of coastal parks	JOURNAL OF ENVIRONMENTAL PSYCHOLOGY	10.1016/j.jenvp.2011.08.008	WoS	FALSE
928	Freeman, Claire; Dickinson, Katharine J. M.; Porter, Stefan; van Heezik, Yolanda	2012	My garden is an expression of me: Exploring householders' relationships with their gardens	JOURNAL OF ENVIRONMENTAL PSYCHOLOGY	10.1016/j.jenvp.2012.01.005	WoS	FALSE
929	Gupta, Sumedha	2018	Impact of volunteering on cognitive decline of the elderly	JOURNAL OF THE ECONOMICS OF AGEING	10.1016/j.jeoa.2018.01.002	WoS	FALSE
930	Picking D, Delgoda R, Younger N, Germos?�n-Robineau L, Boulogne I, Mitchell S.	2015	TRAMIL ethnomedicinal survey in Jamaica	J Ethnopharmacol	10.1016/j.jep.2015.04.027	PubMed	FALSE
931	Picking, D.; Delgoda, R.; Younger, N.; Germosen-Robineau, L.; Boulogne, I.; Mitchell, S.	2015	TRAMIL ethnomedicinal survey in Jamaica	JOURNAL OF ETHNOPHARMACOLOGY	10.1016/j.jep.2015.04.027	WoS	TRUE
932	Erhabor JO, Komakech R, Kang Y, Tang M, Matsabisa MG.	2020	Ethnopharmacological importance and medical applications of Myrothamnus flabellifolius Welw. (Myrothamnaceae)-A review	J Ethnopharmacol	10.1016/j.jep.2020.112576	PubMed	FALSE
933	Erhabor, J. O.; Komakech, R.; Kang, Y.; Tang, M.; Matsabisa, M. G.	2020	Ethnopharmacological importance and medical applications of Myrothamnus flabellifolius Welw. (Myrothamnaceae)-A review	JOURNAL OF ETHNOPHARMACOLOGY	10.1016/j.jep.2020.112576	WoS	TRUE
934	Shih HI, Chao TY, Huang YT, Tu YF, Wang JD, Chang CM.	2020	Increased incidence of stress-associated illnesses among elderly after Typhoon Morakot	J Formos Med Assoc	10.1016/j.jfma.2020.05.016	PubMed	FALSE
935	Mullins JT, White C.	2019	Temperature and mental health: Evidence from the spectrum of mental health outcomes	J Health Econ	10.1016/j.jhealeco.2019.102240	PubMed	FALSE
936	Er F, Iscen P, Sahin S, ?�inar N, Karsidag S, Goularas D.	2017	Distinguishing age-related cognitive decline from dementias: A study based on machine learning algorithms	J Clin Neurosci	10.1016/j.jocn.2017.03.021	PubMed	FALSE
937	Schneider LA, Burns NR, Giles LC, Higgins RD, Nettelbeck TJ, Ridding MC, Pitcher JB.	2014	Cognitive abilities in preterm and term-born adolescents	J Pediatr	10.1016/j.jpeds.2014.03.030	PubMed	FALSE
938	Schneider, Luke A.; Burns, Nicholas R.; Giles, Lynne C.; Higgins, Ryan D.; Nettelbeck, Theodore J.; Ridding, Michael C.; Pitcher, Julia B.	2014	Cognitive Abilities in Preterm and Term-Born Adolescents	JOURNAL OF PEDIATRICS	10.1016/j.jpeds.2014.03.030	WoS	TRUE
939	Wang HH, Zhang ZJ, Tan QR, Yin H, Chen YC, Wang HN, Zhang RG, Wang ZZ, Guo L, Tang LH, Li LJ.	2010	Psychopathological, biological, and neuroimaging characterization of posttraumatic stress disorder in survivors of a severe coalmining disaster in China	J Psychiatr Res	10.1016/j.jpsychires.2009.10.001	PubMed	FALSE
940	Siegmund A, K?�ster L, Meves AM, Plag J, Stoy M, Str?�hle A.	2011	Stress hormones during flooding therapy and their relationship to therapy outcome in patients with panic disorder and agoraphobia	J Psychiatr Res	10.1016/j.jpsychires.2010.07.002	PubMed	FALSE
941	Siegmund, Anja; Koester, Luisa; Meves, Anna M.; Plag, Jens; Stoy, Meline; Stroehle, Andreas	2011	Stress hormones during flooding therapy and their relationship to therapy outcome in patients with panic disorder and agoraphobia	JOURNAL OF PSYCHIATRIC RESEARCH	10.1016/j.jpsychires.2010.07.002	WoS	TRUE
942	Rosellini AJ, Liu S, Anderson GN, Sbi S, Tung ES, Knyazhanskaya E.	2020	Developing algorithms to predict adult onset internalizing disorders: An ensemble learning approach	J Psychiatr Res	10.1016/j.jpsychires.2019.12.006	PubMed	FALSE
943	Rosellini, Anthony J.; Liu, Siyu; Anderson, Grace N.; Sbi, Sophia; Tung, Esther S.; Knyazhanskaya, Evdokia	2020	Developing algorithms to predict adult onset internalizing disorders: An ensemble learning approach	JOURNAL OF PSYCHIATRIC RESEARCH	10.1016/j.jpsychires.2019.12.006	WoS	TRUE
944	Betts KS, Kisely S, Alati R.	2020	Predicting postpartum psychiatric admission using a machine learning approach	J Psychiatr Res	10.1016/j.jpsychires.2020.07.002	PubMed	FALSE
945	Ahola K, V?�?�n?�nen A, Koskinen A, Kouvonen A, Shirom A.	2010	Burnout as a predictor of all-cause mortality among industrial employees: a 10-year prospective register-linkage study	J Psychosom Res	10.1016/j.jpsychores.2010.01.002	PubMed	FALSE
946	Ahola, Kirsi; Vaananen, Ari; Koskinen, Aki; Kouvonen, Anne; Shirom, Arie	2010	Burnout as a predictor of all-cause mortality among industrial employees: A 10-year prospective register-linkage study	JOURNAL OF PSYCHOSOMATIC RESEARCH	10.1016/j.jpsychores.2010.01.002	WoS	TRUE
947	Krog NH, Engdahl B, Tambs K.	2010	The association between tinnitus and mental health in a general population sample: results from the HUNT Study	J Psychosom Res	10.1016/j.jpsychores.2010.03.008	PubMed	FALSE
948	Krog, Norun Hjertager; Engdahl, Bo; Tambs, Kristian	2010	The association between tinnitus and mental health in a general population sample: Results from the HUNT Study	JOURNAL OF PSYCHOSOMATIC RESEARCH	10.1016/j.jpsychores.2010.03.008	WoS	TRUE
949	Bryant, Lia; Gamham, Bridget	2013	Beyond discourses of drought: The micro-politics of the wine industry and farmer distress	JOURNAL OF RURAL STUDIES	10.1016/j.jrurstud.2013.03.002	WoS	FALSE
950	Bryant, Lia; Garnham, Bridget	2014	Economies, ethics and emotions: Farmer distress within the moral economy of agribusiness	JOURNAL OF RURAL STUDIES	10.1016/j.jrurstud.2014.03.006	WoS	FALSE
951	Fennell, Kate M.; Jarrett, Claire E.; Kettler, Lisa J.; Dollman, James; Turnbull, Deborah A.	2016	Watching the bank balance build up then blow away and the rain clouds do the same: A thematic analysis of South Australian farmers' sources of stress during drought	JOURNAL OF RURAL STUDIES	10.1016/j.jrurstud.2016.05.005	WoS	FALSE
952	Fullagar, Simone; O'Brien, Wendy	2018	Rethinking women's experiences of depression and recovery as emplacement: Spatiality, care and gender relations in rural Australia	JOURNAL OF RURAL STUDIES	10.1016/j.jrurstud.2017.12.024	WoS	FALSE
953	Wheeler, Sarah Ann; Zuo, Alec; Loch, Adam	2018	Water torture: Unravelling the psychological distress of irrigators in Australia	JOURNAL OF RURAL STUDIES	10.1016/j.jrurstud.2018.08.006	WoS	FALSE
954	Austin, Emma K.; Rich, Jane L.; Kiem, Anthony S.; Handley, Tonelle; Perkins, David; Kelly, Brian J.	2020	Concerns about climate change among rural residents in Australia	JOURNAL OF RURAL STUDIES	10.1016/j.jrurstud.2020.01.010	WoS	FALSE
955	Andreas S, Harries-Hedder K, Schwenk W, Hausberg M, Koch U, Schulz H.	2010	Is the Health of the Nation Outcome Scales appropriate for the assessment of symptom severity in patients with substance-related disorders?	J Subst Abuse Treat	10.1016/j.jsat.2010.03.011	PubMed	FALSE
956	Black KJ, Munc A, Sinclair RR, Cheung JH.	2019	Stigma at work: The psychological costs and benefits of the pressure to work safely	J Safety Res	10.1016/j.jsr.2019.07.007	PubMed	FALSE
957	Black, Kristen Jennings; Munc, Alec; Sinclair, Robert R.; Cheung, Janelle H.	2019	Stigma at work: The psychological costs and benefits of the pressure to work safely	JOURNAL OF SAFETY RESEARCH	10.1016/j.jsr.2019.07.007	WoS	TRUE
958	Serrano-Fernandez, Maria-Jose; Boada-Grau, Joan; Robert-Sentis, Lluis; Vigil-Colet, Andreu	2019	Predictive variables for musculoskeletal problems in professional drivers	JOURNAL OF TRANSPORT & HEALTH	10.1016/j.jth.2019.100576	WoS	FALSE
959	Nadrian, Haidar; Taghdisi, Mohammad Hossein; Pouyesh, Kowsar; Khazaee-Pool, Maryam; Babazadeh, Towhid	2019	I am sick and tired of this congestion: Perceptions of Sanandaj inhabitants on the family mental health impacts of urban traffic jam	JOURNAL OF TRANSPORT & HEALTH	10.1016/j.jth.2019.100587	WoS	FALSE
960	Cory, Julie	2013	Identification and management of cognitive decline in companion animals and the comparisons with Alzheimer disease: A review	JOURNAL OF VETERINARY BEHAVIOR-CLINICAL APPLICATIONS AND RESEARCH	10.1016/j.jveb.2012.08.001	WoS	FALSE
961	von Lindern, Eike; Bauer, Nicole; Frick, Jacqueline; Hunziker, Marcel; Hartig, Terry	2013	Occupational engagement as a constraint on restoration during leisure time in forest settings	LANDSCAPE AND URBAN PLANNING	10.1016/j.landurbplan.2013.03.001	WoS	FALSE
962	Alcock, I.; White, M. P.; Lovell, R.; Higgins, S. L.; Osborne, N. J.; Husk, K.; Wheeler, B. W.	2015	What accounts for 'England's green and pleasant land'? A panel data analysis of mental health and land cover types in rural England	LANDSCAPE AND URBAN PLANNING	10.1016/j.landurbplan.2015.05.008	WoS	FALSE
963	Gidlow, Christopher J.; Smith, Graham; Martinez, David; Wilson, Richard; Trinder, Paul; Grazuleviciene, Regina; Nieuwenhuijsen, Mark J.	2016	Research note: Natural environments and prescribing in England	LANDSCAPE AND URBAN PLANNING	10.1016/j.landurbplan.2016.02.002	WoS	FALSE
964	Roberts, Adam C.; Christopoulos, George I.	2018	Comment on "Using functional Magnetic Resonance Imaging (fMRI) to analyze brain region activity when viewing landscapes"	LANDSCAPE AND URBAN PLANNING	10.1016/j.landurbplan.2017.12.006	WoS	FALSE
965	Liu, Ye; Wang, Ruoyu; Grekousis, George; Liu, Yuqi; Yuan, Yuan; Li, Zhigang	2019	Neighbourhood greenness and mental wellbeing in Guangzhou, China: What are the pathways?	LANDSCAPE AND URBAN PLANNING	10.1016/j.landurbplan.2019.103602	WoS	FALSE
966	Mavoa, Suzanne; Lucassen, Mathijs; Denny, Simon; Utter, Jennifer; Clark, Terryann; Smith, Melody	2019	Natural neighbourhood environments and the emotional health of urban New Zealand adolescents	LANDSCAPE AND URBAN PLANNING	10.1016/j.landurbplan.2019.103638	WoS	FALSE
967	Collins, Rebecca M.; Spake, Rebecca; Brown, Kerry A.; Ogutu, Booker O.; Smith, Dianna; Eigenbrod, Felix	2020	A systematic map of research exploring the effect of greenspace on mental health	LANDSCAPE AND URBAN PLANNING	10.1016/j.landurbplan.2020.103823	WoS	FALSE
968	King, Tanya; Kilpatrick, Sue; Willis, Karen; Speldewinde, Christopher	2015	A Different Kettle of Fish: Mental health strategies for Australian fishers, and farmers	MARINE POLICY	10.1016/j.marpol.2015.06.013	WoS	FALSE
969	Hall RC, Friedman SH.	2013	Guns, schools, and mental illness: potential concerns for physicians and mental health professionals	Mayo Clin Proc	10.1016/j.mayocp.2013.08.016	PubMed	FALSE
970	Hall, Ryan Chaloner Winton; Friedman, Susan Hatters	2013	Guns, Schools, and Mental Illness: Potential Concerns for Physicians and Mental Health Professionals	MAYO CLINIC PROCEEDINGS	10.1016/j.mayocp.2013.08.016	WoS	TRUE
971	Dean J, van Dooren K, Weinstein P.	2011	Does biodiversity improve mental health in urban settings?	Med Hypotheses	10.1016/j.mehy.2011.02.040	PubMed	FALSE
972	Dean, Julie; van Dooren, Kate; Weinstein, Philip	2011	Does biodiversity improve mental health in urban settings?	MEDICAL HYPOTHESES	10.1016/j.mehy.2011.02.040	WoS	TRUE
973	Nazimek JM, Hunter MD, Woodruff PW.	2012	Auditory hallucinations: expectation-perception model	Med Hypotheses	10.1016/j.mehy.2012.03.014	PubMed	FALSE
974	Nazimek, J. M.; Hunter, M. D.; Woodruff, P. W. R.	2012	Auditory hallucinations: Expectation-perception model	MEDICAL HYPOTHESES	10.1016/j.mehy.2012.03.014	WoS	TRUE
975	Taylor, Steven	2017	Misophonia: A new mental disorder?	MEDICAL HYPOTHESES	10.1016/j.mehy.2017.05.003	WoS	FALSE
976	Jheeta S, Smith D.	2019	Seeing the wood for the trees: A new way to view the human intestinal microbiome and its connection with non-communicable disease	Med Hypotheses	10.1016/j.mehy.2019.02.016	PubMed	FALSE
977	Jheeta, Sohan; Smith, David	2019	Seeing the wood for the trees: A new way to view the human intestinal microbiome and its connection with non-communicable disease	MEDICAL HYPOTHESES	10.1016/j.mehy.2019.02.016	WoS	TRUE
978	Morioka H, Ijichi S, Ijichi N, Ijichi Y, King BH.	2019	Developmental social vulnerability as the intrinsic origin of psychopathology: A paradigm shift from disease entities to psychiatric derivatives within human diversity	Med Hypotheses	10.1016/j.mehy.2019.03.015	PubMed	FALSE
979	Morioka, Hirofumi; Ijichi, Shinji; Ijichi, Naomi; Ijichi, Yukina; King, Bryan H.	2019	Developmental social vulnerability as the intrinsic origin of psychopathology: A paradigm shift from disease entities to psychiatric derivatives within human diversity	MEDICAL HYPOTHESES	10.1016/j.mehy.2019.03.015	WoS	TRUE
980	Costa E Silva JA, Steffen RE.	2019	Urban environment and psychiatric disorders: a review of the neuroscience and biology	Metabolism	10.1016/j.metabol.2019.07.004	PubMed	FALSE
981	Costa e Silva, Jorge Alberto; Steffen, Ricardo E.	2019	Urban environment and psychiatric disorders: a review of the neuroscience and biology	METABOLISM-CLINICAL AND EXPERIMENTAL	10.1016/j.metabol.2019.07.004	WoS	TRUE
982	Frank-Lightfoot, Loraine; Davis, AlexSandra	2016	Creating a Hospital-Based Community Health Worker Program Using College Students: Reducing Costs and Improving Quality	NURSE LEADER	10.1016/j.mnl.2015.12.013	WoS	FALSE
983	Karaca A, Yildirim N, Cangur S, Acikgoz F, Akkus D.	2019	Relationship between mental health of nursing students and coping, self-esteem and social support	Nurse Educ Today	10.1016/j.nedt.2019.01.029	PubMed	FALSE
984	Karaca, A.; Yildirim, N.; Cangur, S.; Acikgoz, F.; Akkus, D.	2019	Relationship between mental health of nursing students and coping, self-esteem and social support	NURSE EDUCATION TODAY	10.1016/j.nedt.2019.01.029	WoS	TRUE
985	Brass M, Furstenberg A, Mele AR.	2019	Why neuroscience does not disprove free will	Neurosci Biobehav Rev	10.1016/j.neubiorev.2019.04.024	PubMed	FALSE
986	Fei, Zixiang; Yang, Erfu; Li, David Day-Uei; Butler, Stephen; Ijomah, Winifred; Li, Xia; Zhou, Huiyu	2020	Deep convolution network based emotion analysis towards mental health care	NEUROCOMPUTING	10.1016/j.neucom.2020.01.034	WoS	FALSE
987	Lautrup S, Lou G, Aman Y, Nilsen H, Tao J, Fang EF.	2019	Microglial mitophagy mitigates neuroinflammation in Alzheimer's disease	Neurochem Int	10.1016/j.neuint.2019.104469	PubMed	FALSE
988	Lautrup, Sofie; Lou, Guofeng; Aman, Yahyah; Nilsen, Hilde; Tao, Jun; Fang, Evandro F.	2019	Microglial mitophagy mitigates neuroinflammation in Alzheimer's disease	NEUROCHEMISTRY INTERNATIONAL	10.1016/j.neuint.2019.104469	WoS	TRUE
989	Schikowski T, Altu?� H.	2020	The role of air pollution in cognitive impairment and decline	Neurochem Int	10.1016/j.neuint.2020.104708	PubMed	FALSE
990	Schikowski, Tamara; Altug, Hicran	2020	The role of air pollution in cognitive impairment and decline	NEUROCHEMISTRY INTERNATIONAL	10.1016/j.neuint.2020.104708	WoS	TRUE
991	Bos I, Jacobs L, Nawrot TS, de Geus B, Torfs R, Int Panis L, Degraeuwe B, Meeusen R.	2011	No exercise-induced increase in serum BDNF after cycling near a major traffic road	Neurosci Lett	10.1016/j.neulet.2011.06.019	PubMed	FALSE
992	Bos, I.; Jacobs, L.; Nawrot, T. S.; de Geus, B.; Torfs, R.; Panis, L. Int; Degraeuwe, B.; Meeusen, R.	2011	No exercise-induced increase in serum BDNF after cycling near a major traffic road	NEUROSCIENCE LETTERS	10.1016/j.neulet.2011.06.019	WoS	TRUE
993	Na KS, Cho SE, Geem ZW, Kim YK.	2020	Predicting future onset of depression among community dwelling adults in the Republic of Korea using a machine learning algorithm	Neurosci Lett	10.1016/j.neulet.2020.134804	PubMed	FALSE
994	Na, Kyoung-Sae; Cho, Seo-Eun; Geem, Zong Woo; Kim, Yong-Ku	2020	Predicting future onset of depression among community dwelling adults in the Republic of Korea using a machine learning algorithm	NEUROSCIENCE LETTERS	10.1016/j.neulet.2020.134804	WoS	TRUE
995	Liu J, Chen Y, Gao D, Jing J, Hu Q.	2014	Prenatal and postnatal lead exposure and cognitive development of infants followed over the first three years of life: a prospective birth study in the Pearl River Delta region, China	Neurotoxicology	10.1016/j.neuro.2014.07.001	PubMed	FALSE
996	Liu Jian'an; Chen Yajun; Gao Dingguo; Jing Jin; Hu Qiansheng	2014	Prenatal and postnatal lead exposure and cognitive development of infants followed over the first three years of life: A prospective birth study in the Pearl River Delta region, China	NEUROTOXICOLOGY	10.1016/j.neuro.2014.07.001	WoS	TRUE
997	Power MC, Adar SD, Yanosky JD, Weuve J.	2016	Exposure to air pollution as a potential contributor to cognitive function, cognitive decline, brain imaging, and dementia: A systematic review of epidemiologic research	Neurotoxicology	10.1016/j.neuro.2016.06.004	PubMed	FALSE
998	Power, Melinda C.; Adar, Sara D.; Yanosky, Jeff D.; Weuve, Jennifer	2016	Exposure to air pollution as a potential contributor to cognitive function, cognitive decline, brain imaging, and dementia: A systematic review of epidemiologic research	NEUROTOXICOLOGY	10.1016/j.neuro.2016.06.004	WoS	TRUE
999	Knyazeva MG, Jalili M, Brioschi A, Bourquin I, Fornari E, Hasler M, Meuli R, Maeder P, Ghika J.	2010	Topography of EEG multivariate phase synchronization in early Alzheimer's disease	Neurobiol Aging	10.1016/j.neurobiolaging.2008.07.019	PubMed	FALSE
1000	Trompet S, Jukema W, Mooijaart SP, Ford I, Stott DJ, Westendorp RG, de Craen AJ.	2012	Genetic variation in galectin-3 gene associates with cognitive function at old age	Neurobiol Aging	10.1016/j.neurobiolaging.2012.05.001	PubMed	FALSE
1001	Trompet, Stella; Jukema, Wouter; Mooijaart, Simon P.; Ford, Ian; Stott, David J.; Westendorp, Rudi G. J.; de Craen, Anton J. M.	2012	Genetic variation in galectin-3 gene associates with cognitive function at old age	NEUROBIOLOGY OF AGING	10.1016/j.neurobiolaging.2012.05.001	WoS	TRUE
1002	Yu M, Gouw AA, Hillebrand A, Tijms BM, Stam CJ, van Straaten EC, Pijnenburg YA.	2016	Different functional connectivity and network topology in behavioral variant of frontotemporal dementia and Alzheimer's disease: an EEG study	Neurobiol Aging	10.1016/j.neurobiolaging.2016.03.018	PubMed	FALSE
1003	Yu, Meichen; Gouw, Alida A.; Hillebrand, Arjan; Tijms, Betty M.; Stam, Cornelis Jan; van Straaten, Elisabeth C. W.; Pijnenburg, Yolande A. L.	2016	Different functional connectivity and network topology in behavioral variant of frontotemporal dementia and Alzheimer's disease: an EEG study	NEUROBIOLOGY OF AGING	10.1016/j.neurobiolaging.2016.03.018	WoS	TRUE
1004	Poulakis K, Pereira JB, Mecocci P, Vellas B, Tsolaki M, K?�oszewska I, Soininen H, Lovestone S, Simmons A, Wahlund LO, Westman E.	2018	Heterogeneous patterns of brain atrophy in Alzheimer's disease	Neurobiol Aging	10.1016/j.neurobiolaging.2018.01.009	PubMed	FALSE
1005	McCubbin J, Vrba J, Murphy P, Temple J, Eswaran H, Lowery CL, Preissl H.	2010	Fetal MEG evoked response latency from beamformer with random field theory	Neuroimage	10.1016/j.neuroimage.2009.08.019	PubMed	FALSE
1006	Moradi E, Pepe A, Gaser C, Huttunen H, Tohka J; Alzheimer's Disease Neuroimaging Initiative.	2015	Machine learning framework for early MRI-based Alzheimer's conversion prediction in MCI subjects	Neuroimage	10.1016/j.neuroimage.2014.10.002	PubMed	FALSE
1007	Moradi, Elaheh; Pepe, Antonietta; Gaser, Christian; Huttunen, Heikki; Tohka, Jussi	2015	Machine learning framework for early MRI-based Alzheimer's conversion prediction in MCI subjects	NEUROIMAGE	10.1016/j.neuroimage.2014.10.002	WoS	TRUE
1008	Tierney TM, Weiss-Croft LJ, Centeno M, Shamshiri EA, Perani S, Baldeweg T, Clark CA, Carmichael DW.	2016	FIACH: A biophysical model for automatic retrospective noise control in fMRI	Neuroimage	10.1016/j.neuroimage.2015.09.034	PubMed	FALSE
1009	Tierney, Tim M.; Weiss-Croft, Louise J.; Centeno, Maria; Shamshiri, Elhum A.; Perani, Suejen; Baldeweg, Torsten; Clark, Christopher A.; Carmichael, David W.	2016	FIACH: A biophysical model for automatic retrospective noise control in fMRI	NEUROIMAGE	10.1016/j.neuroimage.2015.09.034	WoS	TRUE
1010	Pasternak O, Kelly S, Sydnor VJ, Shenton ME.	2018	Advances in microstructural diffusion neuroimaging for psychiatric disorders	Neuroimage	10.1016/j.neuroimage.2018.04.051	PubMed	FALSE
1011	Pasternak, Ofer; Kelly, Sinead; Sydnor, Valerie J.; Shenton, Martha E.	2018	Advances in microstructural diffusion neuroimaging for psychiatric disorders	NEUROIMAGE	10.1016/j.neuroimage.2018.04.051	WoS	TRUE
1012	Keren H, Chen G, Benson B, Ernst M, Leibenluft E, Fox NA, Pine DS, Stringaris A.	2018	Is the encoding of Reward Prediction Error reliable during development?	Neuroimage	10.1016/j.neuroimage.2018.05.039	PubMed	FALSE
1013	Porcaro C, Balsters JH, Mantini D, Robertson IH, Wenderoth N.	2019	P3b amplitude as a signature of cognitive decline in the older population: An EEG study enhanced by Functional Source Separation	Neuroimage	10.1016/j.neuroimage.2018.09.057	PubMed	FALSE
1014	Henry TR, Feczko E, Cordova M, Earl E, Williams S, Nigg JT, Fair DA, Gates KM.	2019	Comparing directed functional connectivity between groups with confirmatory subgrouping GIMME	Neuroimage	10.1016/j.neuroimage.2018.12.040	PubMed	FALSE
1015	Henry, Teague Rhine; Feczko, Eric; Cordova, Michaela; Earl, Eric; Williams, Sandra; Nigg, Joel T.; Fair, Damien A.; Gates, Kathleen M.	2019	Comparing directed functional connectivity between groups with confirmatory subgrouping GIMME	NEUROIMAGE	10.1016/j.neuroimage.2018.12.040	WoS	TRUE
1016	Donini M, Monteiro JM, Pontil M, Hahn T, Fallgatter AJ, Shawe-Taylor J, Mour?�o-Miranda J; Alzheimer's Disease Neuroimaging Initiative.	2019	Combining heterogeneous data sources for neuroimaging based diagnosis: re-weighting and selecting what is important	Neuroimage	10.1016/j.neuroimage.2019.01.053	PubMed	FALSE
1017	Donini, Michele; Monteiro, Joao M.; Pontil, Massimiliano; Hahn, Tim; Fallgatter, Andreas J.; Shawe-Taylor, John; Mourao-Miranda, Janaina	2019	Combining heterogeneous data sources for neuroimaging based diagnosis: re-weighting and selecting what is important	NEUROIMAGE	10.1016/j.neuroimage.2019.01.053	WoS	TRUE
1018	Ngo GH, Eickhoff SB, Nguyen M, Sevinc G, Fox PT, Spreng RN, Yeo BTT.	2019	Beyond consensus: Embracing heterogeneity in curated neuroimaging meta-analysis	Neuroimage	10.1016/j.neuroimage.2019.06.037	PubMed	FALSE
1019	Ngo, Gia H.; Eickhoff, Simon B.; Minh Nguyen; Sevinc, Gunes; Fox, Peter T.; Spreng, R. Nathan; Yeo, B. T. Thomas	2019	Beyond consensus: Embracing heterogeneity in curated neuroimaging meta-analysis	NEUROIMAGE	10.1016/j.neuroimage.2019.06.037	WoS	TRUE
1020	Tozzi L, Staveland B, Holt-Gosselin B, Chesnut M, Chang SE, Choi D, Shiner M, Wu H, Lerma-Usabiaga G, Sporns O, Barch DM, Gotlib IH, Hastie TJ, Kerr AB, Poldrack RA, Wandell BA, Wintermark M, Williams LM.	2020	The human connectome project for disordered emotional states: Protocol and rationale for a research domain criteria study of brain connectivity in young adult anxiety and depression	Neuroimage	10.1016/j.neuroimage.2020.116715	PubMed	FALSE
1021	Cross JH, Cock H.	2020	A perspective on cannabinoids for treating epilepsy: Do they really change the landscape?	Neuropharmacology	10.1016/j.neuropharm.2019.107861	PubMed	FALSE
1022	Cross, J. Helen; Cock, Hannah	2020	A perspective on cannabinoids for treating epilepsy: Do they really change the landscape?	NEUROPHARMACOLOGY	10.1016/j.neuropharm.2019.107861	WoS	TRUE
1023	Orozco-Solis R, Sassone-Corsi P.	2014	Epigenetic control and the circadian clock: linking metabolism to neuronal responses	Neuroscience	10.1016/j.neuroscience.2014.01.043	PubMed	FALSE
1024	Orozco-Solis, R.; Sassone-Corsi, P.	2014	EPIGENETIC CONTROL AND THE CIRCADIAN CLOCK: LINKING METABOLISM TO NEURONAL RESPONSES	NEUROSCIENCE	10.1016/j.neuroscience.2014.01.043	WoS	TRUE
1025	Pacheco, Emily-Marie	2020	Culture learning theory and globalization: Reconceptualizing culture shock for modern cross-cultural sojourners	NEW IDEAS IN PSYCHOLOGY	10.1016/j.newideapsych.2020.100801	WoS	FALSE
1026	Siless V, Hubbard NA, Jones R, Wang J, Lo N, Bauer CCC, Goncalves M, Frosch I, Norton D, Vergara G, Conroy K, De Souza FV, Rosso IM, Wickham AH, Cosby EA, Pinaire M, Hirshfeld-Becker D, Pizzagalli DA, Henin A, Hofmann SG, Auerbach RP, Ghosh S, Gabrieli J, Whitfield-Gabrieli S, Yendiki A.	2020	Image acquisition and quality assurance in the Boston Adolescent Neuroimaging of Depression and Anxiety study	Neuroimage Clin	10.1016/j.nicl.2020.102242	PubMed	FALSE
1027	Siless, Viviana; Hubbard, Nicholas A.; Jones, Robert; Wang, Jonathan; Lo, Nicole; Bauer, Clemens C. C.; Goncalves, Mathias; Frosch, Isabelle; Norton, Daniel; Vergara, Genesis; Conroy, Kristina; De Souza, Flavia Vaz; Rosso, Isabelle M.; Wickham, Aleena Hay; Cosby, Elizabeth Ann; Pinaire, Megan; Hirshfeld-Becker, Dina; Pizzagalli, Diego A.; Henin, Aude; Hofmann, Stefan G.; Auerbach, Randy P.; Ghosh…	2020	Image acquisition and quality assurance in the Boston Adolescent Neuroimaging of Depression and Anxiety study	NEUROIMAGE-CLINICAL	10.1016/j.nicl.2020.102242	WoS	TRUE
1028	Baker FC, Sattari N, de Zambotti M, Goldstone A, Alaynick WA, Mednick SC.	2019	Impact of sex steroids and reproductive stage on sleep-dependent memory consolidation in women	Neurobiol Learn Mem	10.1016/j.nlm.2018.03.017	PubMed	FALSE
1029	Baker, Fiona C.; Sattari, Negin; de Zambotti, Massimiliano; Goldstone, Aimee; Alaynick, William A.; Mednick, Sara C.	2019	Impact of sex steroids and reproductive stage on sleep-dependent memory consolidation in women	NEUROBIOLOGY OF LEARNING AND MEMORY	10.1016/j.nlm.2018.03.017	WoS	TRUE
1030	Palma-Gudiel H, Cirera F, Crispi F, Eixarch E, Fa??an?�s L.	2018	The impact of prenatal insults on the human placental epigenome: A systematic review	Neurotoxicol Teratol	10.1016/j.ntt.2018.01.001	PubMed	FALSE
1031	Palma-Gudiel, Helena; Cirera, Flors; Crispi, Fatima; Eixarch, Elisenda; Fananas, Lourdes	2018	The impact of prenatal insults on the human placental epigenome: A systematic review	NEUROTOXICOLOGY AND TERATOLOGY	10.1016/j.ntt.2018.01.001	WoS	TRUE
1032	Prahm, Nancy; Longo, Bernadette M.; Baxter, Kimberly; Brown, Timothy J.	2013	Lightning Does Strike Twice: A Fulminology Primer for Nurse Practitioners	JNP-JOURNAL FOR NURSE PRACTITIONERS	10.1016/j.nurpra.2013.06.006	WoS	FALSE
1033	Glade MJ.	2010	Oxidative stress and cognitive longevity	Nutrition	10.1016/j.nut.2009.09.014	PubMed	FALSE
1034	Kibria, Abu S. M. G.; Costanza, Robert; Groves, Colin; Behie, Alison M.	2019	Does higher access ensure greater wellbeing? - In the perspective of forest ecosystem services of the Sundarbans mangrove forest, Bangladesh	OCEAN & COASTAL MANAGEMENT	10.1016/j.ocecoaman.2019.04.019	WoS	FALSE
1035	Niemann N, Jankovic J.	2019	Juvenile parkinsonism: Differential diagnosis, genetics, and treatment	Parkinsonism Relat Disord	10.1016/j.parkreldis.2019.06.025	PubMed	FALSE
1036	Niemann, Nicki; Jankovic, Joseph	2019	Juvenile parkinsonism: Differential diagnosis, genetics, and treatment	PARKINSONISM & RELATED DISORDERS	10.1016/j.parkreldis.2019.06.025	WoS	TRUE
1037	Rawlett KE, N'Dri LA, dosReis S, Sibinga E.	2019	Perceived Needs for Adolescent Mental Health in an Urban Community	J Pediatr Health Care	10.1016/j.pedhc.2019.03.003	PubMed	FALSE
1038	Rawlett, Kristen E.; N'Dri, Laetitia A.; dosReis, Susan; Sibinga, Erica	2019	Perceived Needs for Adolescent Mental Health in an Urban Community	JOURNAL OF PEDIATRIC HEALTH CARE	10.1016/j.pedhc.2019.03.003	WoS	TRUE
1039	Koponen, I. T.; Kokkonen, T.; Nousiainen, M.	2017	Modelling sociocognitive aspects of students' learning	PHYSICA A-STATISTICAL MECHANICS AND ITS APPLICATIONS	10.1016/j.physa.2016.11.139	WoS	FALSE
1040	Jedrychowski W, Maugeri U, Perera F, Stigter L, Jankowski J, Butscher M, Mroz E, Flak E, Skarupa A, Sowa A.	2011	Cognitive function of 6-year old children exposed to mold-contaminated homes in early postnatal period. Prospective birth cohort study in Poland	Physiol Behav	10.1016/j.physbeh.2011.06.019	PubMed	FALSE
1041	Jedrychowski, Wieslaw; Maugeri, Umberto; Perera, Frederica; Stigter, Laura; Jankowski, Jeffrey; Butscher, Maria; Mroz, Elzbieta; Flak, Elzbieta; Skarupa, Anita; Sowa, Agata	2011	Cognitive function of 6-year old children exposed to mold-contaminated homes in early postnatal period. Prospective birth cohort study in Poland	PHYSIOLOGY & BEHAVIOR	10.1016/j.physbeh.2011.06.019	WoS	TRUE
1042	Di Fede G, Catania M, Morbin M, Giaccone G, Moro ML, Ghidoni R, Colombo L, Messa M, Cagnotto A, Romeo M, Stravalaci M, Diomede L, Gobbi M, Salmona M, Tagliavini F.	2012	Good gene, bad gene: new APP variant may be both	Prog Neurobiol	10.1016/j.pneurobio.2012.06.004	PubMed	FALSE
1043	Di Fede, Giuseppe; Catania, Marcella; Morbin, Michela; Giaccone, Giorgio; Moro, Maria Luisa; Ghidoni, Roberta; Colombo, Laura; Messa, Massimo; Cagnotto, Alfredo; Romeo, Margherita; Stravalaci, Matteo; Diomede, Luisa; Gobbi, Marco; Salmona, Mario; Tagliavini, Fabrizio	2012	Good gene, bad gene: New APP variant may be both	PROGRESS IN NEUROBIOLOGY	10.1016/j.pneurobio.2012.06.004	WoS	TRUE
1044	Quadros, Vanessa A.; Costa, Fabiano, V; Canzian, Julia; Nogueira, Cristina W.; Rosemberg, Denis B.	2018	Modulatory role of conspecific alarm substance on aggression and brain monoamine oxidase activity in two zebrafish populations	PROGRESS IN NEURO-PSYCHOPHARMACOLOGY & BIOLOGICAL PSYCHIATRY	10.1016/j.pnpbp.2018.03.018	WoS	FALSE
1045	Ziegler C, Morelli V, Fawibe O.	2017	Climate Change and Underserved Communities	Prim Care	10.1016/j.pop.2016.09.017	PubMed	FALSE
1046	Ziegler, Carol; Morelli, Vincent; Fawibe, Omotayo	2017	Climate Change and Underserved Communities	PRIMARY CARE	10.1016/j.pop.2016.09.017	WoS	TRUE
1047	Pancerz, Krzysztof; Paja, Wieslaw; Sarzynski, Jaromir; Gomula, Jerzy	2018	Determining Importance of Ranges of MMPI Scales Using Fuzzification and Relevant Attribute Selection	Procedia Computer Science	10.1016/j.procs.2018.07.245	WoS	FALSE
1048	Ryder AG, Chentsova-Dutton YE.	2012	Depression in cultural context: "Chinese somatization," revisited	Psychiatr Clin North Am	10.1016/j.psc.2011.11.006	PubMed	FALSE
1049	Hays R, Henson P, Wisniewski H, Hendel V, Vaidyam A, Torous J.	2019	Assessing Cognition Outside of the Clinic: Smartphones and Sensors for Cognitive Assessment Across Diverse Psychiatric Disorders	Psychiatr Clin North Am	10.1016/j.psc.2019.08.003	PubMed	FALSE
1050	Hays, Ryan; Henson, Philip; Wisniewski, Hannah; Hendel, Victoria; Vaidyam, Aditya; Torous, John	2019	Assessing Cognition Outside of the Clinic Smartphones and Sensors for Cognitive Assessment Across Diverse Psychiatric Disorders	PSYCHIATRIC CLINICS OF NORTH AMERICA	10.1016/j.psc.2019.08.003	WoS	TRUE
1051	Starks SM, Hankerson SH, Collins PY.	2020	Shifting the Policy Paradigm to Achieve Equity	Psychiatr Clin North Am	10.1016/j.psc.2020.05.004	PubMed	FALSE
1052	Carlier, M.; Mainguet, B.; Delevoye-Turrell, Y.	2016	Cognitive exercise through body movement: Using a fun and short neuropsychological tool to adapt physical activity and enhance pleasure in individuals suffering from mental illnesses	PSYCHOLOGIE FRANCAISE	10.1016/j.psfr.2015.05.004	WoS	FALSE
1053	Dagher RK, Green KM.	2015	Does depression and substance abuse co-morbidity affect socioeconomic status? Evidence from a prospective study of urban African Americans	Psychiatry Res	10.1016/j.psychres.2014.10.026	PubMed	FALSE
1054	Dagher, Rada K.; Green, Kerry M.	2015	Does depression and substance abuse co-morbidity affect socioeconomic status? Evidence from a prospective study of urban African Americans	PSYCHIATRY RESEARCH	10.1016/j.psychres.2014.10.026	WoS	TRUE
1055	Kaplan BJ, Rucklidge JJ, Romijn AR, Dolph M.	2015	A randomised trial of nutrient supplements to minimise psychological stress after a natural disaster	Psychiatry Res	10.1016/j.psychres.2015.05.080	PubMed	FALSE
1056	Kaplan, Bonnie J.; Rucklidge, Julia J.; Romijn, Amy R.; Dolph, Michael	2015	A randomised trial of nutrient supplements to minimise psychological stress after a natural disaster	PSYCHIATRY RESEARCH	10.1016/j.psychres.2015.05.080	WoS	TRUE
1057	Economou M, Angelopoulos E, Peppou LE, Souliotis K, Stefanis C.	2016	Major depression amid financial crisis in Greece: Will unemployment narrow existing gender differences in the prevalence of the disorder in Greece?	Psychiatry Res	10.1016/j.psychres.2016.05.041	PubMed	FALSE
1058	Economou, Marina; Angelopoulos, E.; Peppou, Lily Evangelia; Souliotis, Kyriakos; Stefanis, Costas	2016	Major depression amid financial crisis in Greece: Will unemployment narrow existing gender differences in the prevalence of the disorder in Greece?	PSYCHIATRY RESEARCH	10.1016/j.psychres.2016.05.041	WoS	TRUE
1059	Murray AL, Eisner M, Obsuth I, Ribeaud D.	2017	Situating violent ideations within the landscape of mental health: Associations between violent ideations and dimensions of mental health	Psychiatry Res	10.1016/j.psychres.2017.01.005	PubMed	FALSE
1060	Murray, Aja Louise; Eisner, Manuel; Obsuth, Ingrid; Ribeaud, Denis	2017	Situating violent ideations within the landscape of mental health: Associations between violent ideations and dimensions of mental health	PSYCHIATRY RESEARCH	10.1016/j.psychres.2017.01.005	WoS	TRUE
1061	Leraas BC, Smith KE, Utzinger LM, Cao L, Engel SG, Crosby RD, Mitchell JE, Wonderlich SA.	2018	Affect-based profiles of bulimia nervosa: The utility and validity of indicators assessed in the natural environment	Psychiatry Res	10.1016/j.psychres.2017.09.080	PubMed	FALSE
1062	Leraas, Bethany C.; Smith, Kathryn E.; Utzinger, Linsey M.; Cao, Li; Engel, Scott G.; Crosby, Ross D.; Mitchell, James E.; Wonderlich, Stephen A.	2018	Affect-based profiles of bulimia nervosa: The utility and validity of indicators assessed in the natural environment	PSYCHIATRY RESEARCH	10.1016/j.psychres.2017.09.080	WoS	TRUE
1063	Del Pozo MA, Harbeck S, Zahn S, Kliem S, Kr?�ger C.	2018	Cognitive distortions in anorexia nervosa and borderline personality disorder	Psychiatry Res	10.1016/j.psychres.2017.11.043	PubMed	FALSE
1064	del Pozo, Melina Andrea; Harbeck, Susanne; Zahn, Sabine; Kliem, Soeren; Kroeger, Christoph	2018	Cognitive distortions in anorexia nervosa and borderline personality disorder	PSYCHIATRY RESEARCH	10.1016/j.psychres.2017.11.043	WoS	TRUE
1065	Fox KR, Ribeiro JD, Kleiman EM, Hooley JM, Nock MK, Franklin JC.	2018	Affect toward the self and self-injury stimuli as potential risk factors for nonsuicidal self-injury	Psychiatry Res	10.1016/j.psychres.2017.11.083	PubMed	FALSE
1066	Fox, Kathryn R.; Ribeiro, Jessica D.; Kleiman, Evan M.; Hooley, Jill M.; Nock, Matthew K.; Franklin, Joseph C.	2018	Affect toward the self and self-injury stimuli as potential risk factors for nonsuicidal self-injury	PSYCHIATRY RESEARCH	10.1016/j.psychres.2017.11.083	WoS	TRUE
1067	Dar KA, Iqbal N, Prakash A, Paul MA.	2018	PTSD and depression in adult survivors of flood fury in Kashmir: The payoffs of social support	Psychiatry Res	10.1016/j.psychres.2018.01.023	PubMed	FALSE
1068	Dar, Kaiser Ahmad; Iqbal, Naved; Prakash, Ankit; Paul, Mohd. Altaf	2018	PTSD and depression in adult survivors of flood fury in Kashmir: The payoffs of social support	PSYCHIATRY RESEARCH	10.1016/j.psychres.2018.01.023	WoS	TRUE
1069	Stanley IH, Hom MA, Gai AR, Joiner TE.	2018	Wildland firefighters and suicide risk: Examining the role of social disconnectedness	Psychiatry Res	10.1016/j.psychres.2018.03.017	PubMed	FALSE
1070	Stanley, Ian H.; Hom, Melanie A.; Gai, Anna R.; Joiner, Thomas E.	2018	Wildland firefighters and suicide risk: Examining the role of social disconnectedness	PSYCHIATRY RESEARCH	10.1016/j.psychres.2018.03.017	WoS	TRUE
1071	Lebowitz A, Tachikawa H, Aiba M, Okamoto Y, Takahashi S, Nemoto K, Arai T.	2019	Post-flood social support networks and morbidity in J??s?? City, Japan	Psychiatry Res	10.1016/j.psychres.2018.11.073	PubMed	FALSE
1072	Lebowitz, Adam; Tachikawa, Hirokazu; Aiba, Miyuki; Okamoto, Yuta; Takahashi, Sho; Nemoto, Kiyotaka; Arai, Tetsuaki	2019	Post-flood social support networks and morbidity in Joso City, Japan	PSYCHIATRY RESEARCH	10.1016/j.psychres.2018.11.073	WoS	TRUE
1073	Roberts S, Arseneault L, Barratt B, Beevers S, Danese A, Odgers CL, Moffitt TE, Reuben A, Kelly FJ, Fisher HL.	2019	Exploration of NO(2) and PM(2.5) air pollution and mental health problems using high-resolution data in London-based children from a UK longitudinal cohort study	Psychiatry Res	10.1016/j.psychres.2018.12.050	PubMed	FALSE
1074	Roberts, Susanna; Arseneault, Louise; Barratt, Benjamin; Beevers, Sean; Danese, Andrea; Odgers, Candice L.; Moffitt, Terrie E.; Reuben, Aaron; Kelly, Frank J.; Fisher, Helen L.	2019	Exploration of NO2 and PM2.5 air pollution and mental health problems using high-resolution data in London-based children from a UK longitudinal cohort study	PSYCHIATRY RESEARCH	10.1016/j.psychres.2018.12.050	WoS	TRUE
1075	Walsh-Messinger J, Jiang H, Lee H, Rothman K, Ahn H, Malaspina D.	2019	Relative importance of symptoms, cognition, and other multilevel variables for psychiatric disease classifications by machine learning	Psychiatry Res	10.1016/j.psychres.2019.03.048	PubMed	FALSE
1076	Walsh-Messinger, Julie; Jiang, Haoran; Lee, Hyejoo; Rothman, Karen; Ahn, Hongshik; Malaspina, Dolores	2019	Relative importance of symptoms, cognition, and other multilevel variables for psychiatric disease classifications by machine learning	PSYCHIATRY RESEARCH	10.1016/j.psychres.2019.03.048	WoS	TRUE
1077	Zhao Y, Hoenig JM, Protacio A, Lim S, Norman CC.	2020	Identification of risk factors for early psychiatric rehospitalization	Psychiatry Res	10.1016/j.psychres.2020.112803	PubMed	FALSE
1078	Lima NNR, de Souza RI, Feitosa PWG, Moreira JLS, da Silva CGL, Neto MLR.	2020	People experiencing homelessness: Their potential exposure to COVID-19	Psychiatry Res	10.1016/j.psychres.2020.112945	PubMed	FALSE
1079	Elovanio M, Hakulinen C, Pulkki-R?�back L, Aalto AM, Virtanen M, Partonen T, Suvisaari J.	2020	General Health Questionnaire (GHQ-12), Beck Depression Inventory (BDI-6), and Mental Health Index (MHI-5): psychometric and predictive properties in a Finnish population-based sample	Psychiatry Res	10.1016/j.psychres.2020.112973	PubMed	FALSE
1080	Dsouza DD, Quadros S, Hyderabadwala ZJ, Mamun MA.	2020	Aggregated COVID-19 suicide incidences in India: Fear of COVID-19 infection is the prominent causative factor	Psychiatry Res	10.1016/j.psychres.2020.113145	PubMed	FALSE
1081	Joseph R, Kester R, O'Brien C, Huang H.	2017	The Evolving Practice of Psychiatry in the Era of Integrated Care	Psychosomatics	10.1016/j.psym.2017.04.003	PubMed	FALSE
1082	Joseph, Robert; Kester, Rachel; O'Brien, Colleen; Huang, Hsiang	2017	The Evolving Practice of Psychiatry in the Era of Integrated Care	PSYCHOSOMATICS	10.1016/j.psym.2017.04.003	WoS	TRUE
1083	Edgcomb J, Shaddox T, Hellemann G, Brooks JO 3rd.	2019	High-Risk Phenotypes of Early Psychiatric Readmission in Bipolar Disorder With Comorbid?�Medical Illness	Psychosomatics	10.1016/j.psym.2019.05.002	PubMed	FALSE
1084	Edgcomb, Juliet; Shaddox, Trevor; Hellemann, Gerhard; Brooks, John O., III	2019	High-Risk Phenotypes of Early Psychiatric Readmission in Bipolar Disorder With Comorbid Medical Illness	PSYCHOSOMATICS	10.1016/j.psym.2019.05.002	WoS	TRUE
1085	Jo?�ls M.	2011	Impact of glucocorticoids on brain function: relevance for mood disorders	Psychoneuroendocrinology	10.1016/j.psyneuen.2010.03.004	PubMed	FALSE
1086	Thomas KS, Bower JE, Williamson TJ, Hoyt MA, Wellisch D, Stanton AL, Irwin M.	2012	Post-traumatic disorder symptoms and blunted diurnal cortisol production in partners of prostate cancer patients	Psychoneuroendocrinology	10.1016/j.psyneuen.2011.12.008	PubMed	FALSE
1087	Thomas, Kamala S.; Bower, Julienne E.; Williamson, Timothy J.; Hoyt, Michael A.; Wellisch, David; Stanton, Annette L.; Irwin, Michael	2012	Post-traumatic disorder symptoms and blunted diurnal cortisol production in partners of prostate cancer patients	PSYCHONEUROENDOCRINOLOGY	10.1016/j.psyneuen.2011.12.008	WoS	TRUE
1088	Shalev I, Entringer S, Wadhwa PD, Wolkowitz OM, Puterman E, Lin J, Epel ES.	2013	Stress and telomere biology: a lifespan perspective	Psychoneuroendocrinology	10.1016/j.psyneuen.2013.03.010	PubMed	FALSE
1089	Shalev, Clan; Entringer, Sonja; Wadhwa, Pathik D.; Wolkowitz, Owen M.; Puterman, Eli; Lin, Jue; Epel, Elissa S.	2013	Stress and telomere biology: A lifespan perspective	PSYCHONEUROENDOCRINOLOGY	10.1016/j.psyneuen.2013.03.010	WoS	TRUE
1090	Guffanti G, Galea S, Yan L, Roberts AL, Solovieff N, Aiello AE, Smoller JW, De Vivo I, Ranu H, Uddin M, Wildman DE, Purcell S, Koenen KC.	2013	Genome-wide association study implicates a novel RNA gene, the lincRNA AC068718.1, as a risk factor for post-traumatic stress disorder in women	Psychoneuroendocrinology	10.1016/j.psyneuen.2013.08.014	PubMed	FALSE
1091	Guffanti, Guia; Galea, Sandro; Yan, Lulu; Roberts, Andrea L.; Solovieff, Nadia; Aiello, Allison E.; Smoller, Jordan W.; De Vivo, Innmaculata; Ranu, Hardeep; Uddin, Monica; Wildman, Derek E.; Purcell, Shaun; Koenen, Karestan C.	2013	Genome-wide association study implicates a novel RNA gene, the lincRNA AC068718.1, as a risk factor for post-traumatic stress disorder in women	PSYCHONEUROENDOCRINOLOGY	10.1016/j.psyneuen.2013.08.014	WoS	TRUE
1092	Lee J, Park BJ, Tsunetsugu Y, Ohira T, Kagawa T, Miyazaki Y.	2011	Effect of forest bathing on physiological and psychological responses in young Japanese male subjects	Public Health	10.1016/j.puhe.2010.09.005	PubMed	FALSE
1093	Monsour BB, Johnston JM, Hennessy TW, Schmidt MI, Krieger N.	2012	Visions for the 20th International Epidemiological Association's World Congress of Epidemiology (WCE 2014)	Public Health	10.1016/j.puhe.2011.12.015	PubMed	FALSE
1094	Monsour, B. B.; Johnston, J. M.; Hennessy, T. W.; Schmidt, M. I.; Krieger, N.	2012	Visions for the 20th International Epidemiological Association's World Congress of Epidemiology (WCE 2014)	PUBLIC HEALTH	10.1016/j.puhe.2011.12.015	WoS	TRUE
1095	Tham S, Thompson R, Landeg O, Murray KA, Waite T.	2020	Indoor temperature and health: a global systematic review	Public Health	10.1016/j.puhe.2019.09.005	PubMed	FALSE
1096	Ho, Hilda; Fergus, Karen; Perry, Adrienne	2018	Looking back and moving forward: The experiences of canadian parents raising an adolescent with autism spectrum disorder	RESEARCH IN AUTISM SPECTRUM DISORDERS	10.1016/j.rasd.2018.05.004	WoS	FALSE
1097	Parra A, Maschi G.	2018	Attributional Biases in Psychiatric Patients, a Religious, and a Control Group in the Assessment of a Hallucinatory Experience: The "White Christmas Test"	Rev Colomb Psiquiatr	10.1016/j.rcp.2017.01.010	PubMed	FALSE
1098	Lu, Hui; Yue, Ailing; Chen, Hong; Long, Ruyin	2018	Could smog pollution lead to the migration of local skilled workers? Evidence from the Jing-Jin-Ji region in China	RESOURCES CONSERVATION AND RECYCLING	10.1016/j.resconrec.2017.11.024	WoS	FALSE
1099	Daniau C, Dor F, Eilstein D, Lefranc A, Empereur-Bissonnet P, Dab W.	2013	[Study of self-reported health of people living near point sources of environmental pollution: a review. Second part: analysis of results and perspectives]	Rev Epidemiol Sante Publique	10.1016/j.respe.2013.05.010	PubMed	FALSE
1100	Roberts JE, Tonnsen BL, Robinson M, McQuillin SD, Hatton DD.	2014	Temperament factor structure in fragile X syndrome: the children's behavior questionnaire	Res Dev Disabil	10.1016/j.ridd.2013.11.024	PubMed	FALSE
1101	Roberts, Jane E.; Tonnsen, Bridgette L.; Robinson, Marissa; McQuillin, Samuel D.; Hatton, Deborah D.	2014	Temperament factor structure in fragile X syndrome: The Children's Behavior Questionnaire	RESEARCH IN DEVELOPMENTAL DISABILITIES	10.1016/j.ridd.2013.11.024	WoS	TRUE
1102	Obaseki DO, Awopeju OF, Awokola BI, Adeniyi BO, Adefuye BO, Ozoh OB, Isiguzo GC, Amusa GA, Adewole OO, Erhabor GE.	2017	Domestic solid fuel combustion in an adult population in Nigeria: A cross sectional analysis of association with respiratory symptoms, quality of life and lung function	Respir Med	10.1016/j.rmed.2017.07.014	PubMed	FALSE
1103	Obaseki, Daniel O.; Awopeju, Olayemi F.; Awokola, Babatunde I.; Adeniyi, Bamidele O.; Adefuye, Bolanle O.; Ozoh, Obianuju B.; Isiguzo, Godsent C.; Amusa, Ganiyu A.; Adewole, Olufemi O.; Erhabor, Gregory E.	2017	Domestic solid fuel combustion in an adult population in Nigeria: A cross sectional analysis of association with respiratory symptoms, quality of life and lung function	RESPIRATORY MEDICINE	10.1016/j.rmed.2017.07.014	WoS	TRUE
1104	Balseviciene, Birute; Sinkariova, Liuda; Andrusaityte, Sandra	2013	Do Green Spaces Matter? The Associations Between Parenting Stress, Child Mental Health Problems And Green Spaces	Procedia Social and Behavioral Sciences	10.1016/j.sbspro.2014.04.462	WoS	FALSE
1105	Kucuk, Ahmet Eralp; Orhan, Zeynep; Kabil, Melekcan	2014	Psychodroid: A Mobile Psychological Disorder Detection Application by Dynamic Question Generation and Content Analysis	Procedia Social and Behavioral Sciences	10.1016/j.sbspro.2014.12.470	WoS	FALSE
1106	Sipon, Sapora; Sakdan, Mohd Fo'ad; Mustaffa, Che Su; Marzuki, Najib Ahmad; Khalid, Mohamad Sukeri; Ariffin, Mohd Taib; Nazli, Nik Nadian Nisa Nik; Abdullah, Salhah	2015	Spirituality among Flood Victims: A Comparison between Two States	Procedia Social and Behavioral Sciences	10.1016/j.sbspro.2015.03.410	WoS	FALSE
1107	Bachmann S, Weisbrod M, R?�hrig M, Schr?�der J, Thomas C, Scherg M, Rupp A.	2010	MEG does not reveal impaired sensory gating in first-episode schizophrenia	Schizophr Res	10.1016/j.schres.2010.03.007	PubMed	FALSE
1108	Bachmann, Silke; Weisbrod, Matthias; Roehrig, Miriam; Schroeder, Johannes; Thomas, Christine; Scherg, Michael; Rupp, Andre	2010	MEG does not reveal impaired sensory gating in first-episode schizophrenia	SCHIZOPHRENIA RESEARCH	10.1016/j.schres.2010.03.007	WoS	TRUE
1109	Renwick L, Lyne J, Donoghue BO, Owens L, Doyle R, Hill M, McCarthy E, Pilling M, O'Callaghan E, Clarke M.	2015	Prodromal symptoms and remission following first episode psychosis	Schizophr Res	10.1016/j.schres.2015.07.001	PubMed	FALSE
1110	Renwick, Laoise; Lyne, John; Donoghue, Brian O.; Owens, Liz; Doyle, Roisin; Hill, Michele; McCarthy, Emma; Pilling, Mark; O'Callaghan, Eadbhard; Clarke, Mary	2015	Prodromal symptoms and remission following first episode psychosis	SCHIZOPHRENIA RESEARCH	10.1016/j.schres.2015.07.001	WoS	TRUE
1111	Attademo L, Bernardini F, Garinella R, Compton MT.	2017	Environmental pollution and risk of psychotic disorders: A review of the science to date	Schizophr Res	10.1016/j.schres.2016.10.003	PubMed	FALSE
1112	Attademo, Luigi; Bernardini, Francesco; Garinella, Raffaele; Compton, Michael T.	2017	Environmental pollution and risk of psychotic disorders: A review of the science to date	SCHIZOPHRENIA RESEARCH	10.1016/j.schres.2016.10.003	WoS	TRUE
1113	Galletly C, Dhillon VS, Liu D, Balzan RP, Hahn LA, Fenech MF.	2017	Shorter telomere length in people with schizophrenia: A preliminary study from Australia	Schizophr Res	10.1016/j.schres.2017.03.007	PubMed	FALSE
1114	Schalinski I, Breinlinger S, Hirt V, Teicher MH, Odenwald M, Rockstroh B.	2019	Environmental adversities and psychotic symptoms: The impact of timing of trauma, abuse, and neglect	Schizophr Res	10.1016/j.schres.2017.10.034	PubMed	FALSE
1115	Inga, Schalinski; Susanne, Breinlinger; Vanessa, Hirt; Martin, Teicher H.; Michael, Odenwald; Brigitte, Rockstroh	2019	Environmental adversities and psychotic symptoms: The impact of timing of trauma, abuse, and neglect	SCHIZOPHRENIA RESEARCH	10.1016/j.schres.2017.10.034	WoS	TRUE
1116	Fonseca-Pedrero E, Chan RCK, Debban?� M, Cicero D, Zhang LC, Brenner C, Barkus E, Linscott RJ, Kwapil T, Barrantes-Vidal N, Cohen A, Raine A, Compton MT, Tone EB, Suhr J, Mu??iz J, de Alb?�niz AP, Fumero A, Giakoumaki S, Tsaousis I, Preti A, Chmielewski M, Laloyaux J, Mechri A, Lahmar MA, Wuthrich V, Lar?�i F, Badcock JC, Jablensky A, Ortu??o-Sierra J.	2018	Comparisons of schizotypal traits across 12 countries: Results from the International Consortium for Schizotypy Research	Schizophr Res	10.1016/j.schres.2018.03.021	PubMed	FALSE
1117	Fonseca-Pedrero, Eduardo; Chan, Raymond C. K.; Debbane, Martin; Cicero, David; Zhang, Lisa C.; Brenner, Colleen; Barkus, Emma; Linscott, Richard J.; Kwapil, Thomas; Barrantes-Vidal, Neus; Cohen, Alex; Raine, Adrian; Compton, Michael T.; Tone, Erin B.; Suhr, Julie; Muniz, Jose; Perez de Albeniz, Alicia; Fumero, Axit; Giakoumaki, Stella; Tsaousis, Ioannis; Preti, Antonio; Chmielewski, Michael; Lalo…	2018	Comparisons of schizotypal traits across 12 countries: Results from the International Consortium for Schizotypy Research	SCHIZOPHRENIA RESEARCH	10.1016/j.schres.2018.03.021	WoS	TRUE
1118	Engemann K, Pedersen CB, Arge L, Tsirogiannis C, Mortensen PB, Svenning JC.	2018	Childhood exposure to green space - A novel risk-decreasing mechanism for schizophrenia?	Schizophr Res	10.1016/j.schres.2018.03.026	PubMed	FALSE
1119	Stamate D, Katrinecz A, Stahl D, Verhagen SJW, Delespaul PAEG, van Os J, Guloksuz S.	2019	Identifying psychosis spectrum disorder from experience sampling data using machine learning approaches	Schizophr Res	10.1016/j.schres.2019.04.028	PubMed	FALSE
1120	Stamate, Daniel; Katrinecz, Andrea; Stahl, Daniel; Verhagen, Simone J. W.; Delespaul, Philippe A. E. G.; van Os, Jim; Guloksuz, Sinan	2019	Identifying psychosis spectrum disorder from experience sampling data using machine learning approaches	SCHIZOPHRENIA RESEARCH	10.1016/j.schres.2019.04.028	WoS	TRUE
1121	Engemann K, Svenning JC, Arge L, Brandt J, Geels C, Mortensen PB, Plana-Ripoll O, Tsirogiannis C, Pedersen CB.	2020	Natural surroundings in childhood are associated with lower schizophrenia rates	Schizophr Res	10.1016/j.schres.2019.10.012	PubMed	FALSE
1122	Williams S, Nitschke M, Sullivan T, Tucker GR, Weinstein P, Pisaniello DL, Parton KA, Bi P.	2012	Heat and health in Adelaide, South Australia: assessment of heat thresholds and temperature relationships	Sci Total Environ	10.1016/j.scitotenv.2011.11.038	PubMed	FALSE
1123	Stansfeld SA, Shipley M.	2015	Noise sensitivity and future risk of illness and mortality	Sci Total Environ	10.1016/j.scitotenv.2015.03.053	PubMed	FALSE
1124	Gao J, Woodward A, Vardoulakis S, Kovats S, Wilkinson P, Li L, Xu L, Li J, Yang J, Li J, Cao L, Liu X, Wu H, Liu Q.	2017	Haze, public health and mitigation measures in China: A review of the current evidence for further policy response	Sci Total Environ	10.1016/j.scitotenv.2016.10.231	PubMed	FALSE
1125	Gao, Jinghong; Woodward, Alistair; Vardoulakis, Sotiris; Kovats, Sari; Wilkinson, Paul; Li, Liping; Xu, Lei; Li, Jing; Yang, Jun; Li, Jing; Cao, Lina; Liu, Xiaobo; Wu, Haixia; Liu, Qiyong	2017	Haze, public health and mitigation measures in China: A review of the current evidence for further policy response	SCIENCE OF THE TOTAL ENVIRONMENT	10.1016/j.scitotenv.2016.10.231	WoS	TRUE
1126	Min JY, Kim HJ, Min KB.	2018	Long-term exposure to air pollution and the risk of suicide death: A population-based cohort study	Sci Total Environ	10.1016/j.scitotenv.2018.02.011	PubMed	FALSE
1127	Cui L, Wang S, Yang X, Gao L, Zheng M, Wang R, Qiao L, Xu C.	2018	Fatty acids, polychlorinated dibenzo-p-dioxins and dibenzofurans, and dioxin-like polychlorinated biphenyls in paired muscle and skin from fish from the Bohai coast, China: Benefits and risks associated with fish consumption	Sci Total Environ	10.1016/j.scitotenv.2018.05.195	PubMed	FALSE
1128	Cui, Lili; Wang, Shasha; Yang, Xianpeng; Gao, Lirong; Zheng, Minghui; Wang, Runhua; Qiao, Lin; Xu, Chi	2018	Fatty acids, polychlorinated dibenzo-p-dioxins and dibenzofurans, and dioxin-like polychlorinated biphenyls in paired muscle and skin from fish from the Bohai coast, China: Benefits and risks associated with fish consumption	SCIENCE OF THE TOTAL ENVIRONMENT	10.1016/j.scitotenv.2018.05.195	WoS	TRUE
1129	Markevych I, Tesch F, Datzmann T, Romanos M, Schmitt J, Heinrich J.	2018	Outdoor air pollution, greenspace, and incidence of ADHD: A semi-individual study	Sci Total Environ	10.1016/j.scitotenv.2018.06.167	PubMed	FALSE
1130	Markevych, Iana; Tesch, Falko; Datzmann, Thomas; Romanos, Marcel; Schmitt, Jochen; Heinrich, Joachim	2018	Outdoor air pollution, greenspace, and incidence of ADHD: A semi-individual study	SCIENCE OF THE TOTAL ENVIRONMENT	10.1016/j.scitotenv.2018.06.167	WoS	TRUE
1131	Almendra R, Loureiro A, Silva G, Vasconcelos J, Santana P.	2019	Short-term impacts of air temperature on hospitalizations for mental disorders in Lisbon	Sci Total Environ	10.1016/j.scitotenv.2018.07.337	PubMed	FALSE
1132	Almendra, Ricardo; Loureiro, Adriana; Silva, Giovani; Vasconcelos, Joao; Santana, Paula	2019	Short-term impacts of air temperature on hospitalizations for mental disorders in Lisbon	SCIENCE OF THE TOTAL ENVIRONMENT	10.1016/j.scitotenv.2018.07.337	WoS	TRUE
1133	Pun VC, Manjourides J, Suh HH.	2019	Close proximity to roadway and urbanicity associated with mental ill-health in older adults	Sci Total Environ	10.1016/j.scitotenv.2018.12.221	PubMed	FALSE
1134	Pun, Vivian C.; Manjourides, Justin; Suh, Helen H.	2019	Close proximity to roadway and urbanicity associated with mental ill-health in older adults	SCIENCE OF THE TOTAL ENVIRONMENT	10.1016/j.scitotenv.2018.12.221	WoS	TRUE
1135	Akter S.	2019	Impact of drinking water salinity on children's education: Empirical evidence from coastal Bangladesh	Sci Total Environ	10.1016/j.scitotenv.2019.06.458	PubMed	FALSE
1136	Akter, Sonia	2019	Impact of drinking water salinity on children's education: Empirical evidence from coastal Bangladesh	SCIENCE OF THE TOTAL ENVIRONMENT	10.1016/j.scitotenv.2019.06.458	WoS	TRUE
1137	Wu J, Huang C, Pang M, Wang Z, Yang L, FitzGerald G, Zhong S.	2019	Planned sheltering as an adaptation strategy to climate change: Lessons learned from the severe flooding in Anhui Province of China in 2016	Sci Total Environ	10.1016/j.scitotenv.2019.133586	PubMed	FALSE
1138	Wu, Jiabing; Huang, Cunrui; Pang, Minghui; Wang, Zhe; Yang, Lianping; FitzGerald, Gerard; Zhong, Shuang	2019	Planned sheltering as an adaptation strategy to climate change: Lessons learned from the severe flooding in Anhui Province of China in 2016	SCIENCE OF THE TOTAL ENVIRONMENT	10.1016/j.scitotenv.2019.133586	WoS	TRUE
1139	Moulin TC, van Egmond LT.	2019	A possible role for pollutants in mental disorders via gut microbiota	Sci Total Environ	10.1016/j.scitotenv.2019.133639	PubMed	FALSE
1140	Moulin, Thiago C.; van Egmond, Lieve T.	2019	A possible role for pollutants in mental disorders via gut microbiota	SCIENCE OF THE TOTAL ENVIRONMENT	10.1016/j.scitotenv.2019.133639	WoS	TRUE
1141	Wei Q, Zhang X, Yi W, Pan R, Gao J, Duan J, Xu Z, Cheng Q, Bai L, Zhang Y, Su H.	2020	Association between floods and hospital admissions for schizophrenia in Hefei, China: The lag effects of degrees of floods and time variation	Sci Total Environ	10.1016/j.scitotenv.2019.134179	PubMed	FALSE
1142	Wei, Qiannan; Zhang, Xulai; Yi, Weizhuo; Pan, Rubing; Gao, Jiaojiao; Duan, Jun; Xu, Zihan; Cheng, Qiang; Bai, Lijun; Zhang, Yanwu; Su, Hong	2020	Association between floods and hospital admissions for schizophrenia in Hefei, China: The lag effects of degrees of floods and time variation	SCIENCE OF THE TOTAL ENVIRONMENT	10.1016/j.scitotenv.2019.134179	WoS	TRUE
1143	Wang R, Yang B, Yao Y, Bloom MS, Feng Z, Yuan Y, Zhang J, Liu P, Wu W, Lu Y, Baranyi G, Wu R, Liu Y, Dong G.	2020	Residential greenness, air pollution and psychological well-being among urban residents in Guangzhou, China	Sci Total Environ	10.1016/j.scitotenv.2019.134843	PubMed	FALSE
1144	Wang, Ruoyu; Yang, Boyi; Yao, Yao; Bloom, Michael S.; Feng, Zhiqiang; Yuan, Yuan; Zhang, Jinbao; Liu, Penghua; Wu, Wenjie; Lu, Yi; Baranyi, Gergo; Wu, Rong; Liu, Ye; Dong, Guanghui	2020	Residential greenness, air pollution and psychological well-being among urban residents in Guangzhou, China	SCIENCE OF THE TOTAL ENVIRONMENT	10.1016/j.scitotenv.2019.134843	WoS	TRUE
1145	D?�az J, L??pez-Bueno JA, L??pez-Ossorio JJ, G??nz?�lez JL, S?�nchez F, Linares C.	2020	Short-term effects of traffic noise on suicides and emergency hospital admissions due to anxiety and depression in Madrid (Spain)	Sci Total Environ	10.1016/j.scitotenv.2019.136315	PubMed	FALSE
1146	Diaz, J.; Lopez-Bueno, J. A.; Lopez-Ossorio, J. J.; Gonzalez, J. L.; Sanchez, F.; Linares, C.	2020	Short-term effects of traffic noise on suicides and emergency hospital admissions due to anxiety and depression in Madrid (Spain)	SCIENCE OF THE TOTAL ENVIRONMENT	10.1016/j.scitotenv.2019.136315	WoS	TRUE
1147	Wu Z, Chen X, Li G, Tian L, Wang Z, Xiong X, Yang C, Zhou Z, Pan X.	2020	Attributable risk and economic cost of hospital admissions for mental disorders due to PM(2.5) in Beijing	Sci Total Environ	10.1016/j.scitotenv.2020.137274	PubMed	FALSE
1148	Wu, Ziting; Chen, Xi; Li, Guoxing; Tian, Lin; Wang, Zhan; Xiong, Xiuqin; Yang, Chuan; Zhou, Zijun; Pan, Xiaochuan	2020	Attributable risk and economic cost of hospital admissions for mental disorders due to PM2.5 in Beijing	SCIENCE OF THE TOTAL ENVIRONMENT	10.1016/j.scitotenv.2020.137274	WoS	TRUE
1149	Wang P, Goggins WB, Zhang X, Ren C, Lau KK.	2020	Association of urban built environment and socioeconomic factors with suicide mortality in high-density cities: A case study of Hong Kong	Sci Total Environ	10.1016/j.scitotenv.2020.139877	PubMed	FALSE
1150	Helbich M, Browning MHEM, Huss A.	2020	Outdoor light at night, air pollution and depressive symptoms: A cross-sectional study in the Netherlands	Sci Total Environ	10.1016/j.scitotenv.2020.140914	PubMed	FALSE
1151	Thilakaratne RA, Malig BJ, Basu R.	2020	Examining the relationship between ambient carbon monoxide, nitrogen dioxide, and mental health-related emergency department visits in California, USA	Sci Total Environ	10.1016/j.scitotenv.2020.140915	PubMed	FALSE
1152	Bai, Li; Chen, Wanyue; He, Zijian; Sun, Siyue; Qin, Jia	2020	Pollution characteristics, sources and health risk assessment of polycyclic aromatic hydrocarbons in PM2.5 in an office building in northern areas, China	SUSTAINABLE CITIES AND SOCIETY	10.1016/j.scs.2019.101891	WoS	FALSE
1153	Burns, S. Barnett; Szyszkowicz, J. Kasia; Luheshi, Giamal N.; Lutz, Pierre-Eric; Turecki, Gustavo	2018	Plasticity of the epigenome during early-life stress	SEMINARS IN CELL & DEVELOPMENTAL BIOLOGY	10.1016/j.semcdb.2017.09.033	WoS	FALSE
1154	Maung HH.	2020	Pluralism and incommensurability in suicide research	Stud Hist Philos Biol Biomed Sci	10.1016/j.shpsc.2019.101247	PubMed	FALSE
1155	Maung, Hane Htut	2020	Pluralism and incommensurability in suicide research	STUDIES IN HISTORY AND PHILOSOPHY OF SCIENCE PART C-STUDIES IN HISTORY AND PHILOSOPHY OF BIOLOGICAL AND BIOMEDICAL SCIENCES	10.1016/j.shpsc.2019.101247	WoS	TRUE
1156	Kruger DJ, Kodjebacheva GD, Cupal S.	2017	Poor tap water quality experiences and poor sleep quality during the Flint, Michigan Municipal Water Crisis	Sleep Health	10.1016/j.sleh.2017.05.007	PubMed	FALSE
1157	Johnson BS, Malecki KM, Peppard PE, Beyer KMM.	2018	Exposure to neighborhood green space and sleep: evidence from the Survey of the Health of Wisconsin	Sleep Health	10.1016/j.sleh.2018.08.001	PubMed	FALSE
1158	Foulkes L, McMillan D, Gregory AM.	2019	A bad night's sleep on campus: an interview study of first-year university students with poor sleep quality	Sleep Health	10.1016/j.sleh.2019.01.003	PubMed	FALSE
1159	Foulkes, L.; McMillan, D.; Gregory, A. M.	2019	A bad night's sleep on campus: an interview study of first-year university students with poor sleep quality	SLEEP HEALTH	10.1016/j.sleh.2019.01.003	WoS	TRUE
1160	Fothergill KE, Ensminger ME, Robertson J, Green KM, Thorpe RJ, Juon HS.	2011	Effects of social integration on health: A prospective study of community engagement among African American women	Soc Sci Med	10.1016/j.socscimed.2010.10.024	PubMed	FALSE
1161	Mitchell R.	2013	Is physical activity in natural environments better for mental health than physical activity in other environments?	Soc Sci Med	10.1016/j.socscimed.2012.04.012	PubMed	FALSE
1162	Mitchell, Richard	2013	Is physical activity in natural environments better for mental health than physical activity in other environments?	SOCIAL SCIENCE & MEDICINE	10.1016/j.socscimed.2012.04.012	WoS	TRUE
1163	Liggins J, Kearns RA, Adams PJ.	2013	Using autoethnography to reclaim the 'place of healing' in mental health care	Soc Sci Med	10.1016/j.socscimed.2012.06.013	PubMed	FALSE
1164	Liggins, J.; Kearns, R. A.; Adams, P. J.	2013	Using autoethnography to reclaim the 'place of healing' in mental health care	SOCIAL SCIENCE & MEDICINE	10.1016/j.socscimed.2012.06.013	WoS	TRUE
1165	Wind TR, Komproe IH.	2012	The mechanisms that associate community social capital with post-disaster mental health: a multilevel model	Soc Sci Med	10.1016/j.socscimed.2012.06.032	PubMed	FALSE
1166	Wind, Tim R.; Komproe, Ivan H.	2012	The mechanisms that associate community social capital with post-disaster mental health: A multilevel model	SOCIAL SCIENCE & MEDICINE	10.1016/j.socscimed.2012.06.032	WoS	TRUE
1167	Wood, Victoria J.; Curtis, Sarah E.; Gesler, Wil; Spencer, Ian H.; Close, Helen J.; Mason, James; Reilly, Joe G.	2013	Creating 'therapeutic landscapes' for mental health carers in inpatient settings: A dynamic perspective on permeability and inclusivity	SOCIAL SCIENCE & MEDICINE	10.1016/j.socscimed.2012.09.045	WoS	FALSE
1168	Chen J, Chen S, Landry PF.	2013	Migration, environmental hazards, and health outcomes in China	Soc Sci Med	10.1016/j.socscimed.2012.12.002	PubMed	FALSE
1169	Chen, Juan; Chen, Shuo; Landry, Pierre F.	2013	Migration, environmental hazards, and health outcomes in China	SOCIAL SCIENCE & MEDICINE	10.1016/j.socscimed.2012.12.002	WoS	TRUE
1170	Curtis, Sarah; Gesler, Wilbert; Wood, Victoria; Spencer, Ian; Mason, James; Close, Helen; Reilly, Joseph	2013	Compassionate containment? Balancing technical safety and therapy in the design of psychiatric wards	SOCIAL SCIENCE & MEDICINE	10.1016/j.socscimed.2013.06.015	WoS	FALSE
1171	Willand N, Ridley I, Maller C.	2015	Towards explaining the health impacts of residential energy efficiency interventions - A realist review. Part 1: Pathways	Soc Sci Med	10.1016/j.socscimed.2015.02.005	PubMed	FALSE
1172	Willand, Nicola; Ridley, Ian; Maller, Cecily	2015	Towards explaining the health impacts of residential energy efficiency interventions - A realist review. Part 1: Pathways	SOCIAL SCIENCE & MEDICINE	10.1016/j.socscimed.2015.02.005	WoS	TRUE
1173	Elliott LR, White MP, Taylor AH, Herbert S.	2015	Energy expenditure on recreational visits to different natural environments	Soc Sci Med	10.1016/j.socscimed.2015.06.038	PubMed	FALSE
1174	Elliott, Lewis R.; White, Mathew P.; Taylor, Adrian H.; Herbert, Stephen	2015	Energy expenditure on recreational visits to different natural environments	SOCIAL SCIENCE & MEDICINE	10.1016/j.socscimed.2015.06.038	WoS	TRUE
1175	Petrasek MacDonald J, Cunsolo Willox A, Ford JD, Shiwak I, Wood M; IMHACC Team; Rigolet Inuit Community Government.	2015	Protective factors for mental health and well-being in a changing climate: Perspectives from Inuit youth in Nunatsiavut, Labrador	Soc Sci Med	10.1016/j.socscimed.2015.07.017	PubMed	FALSE
1176	MacDonald, Joanna Petrasek; Willox, Ashlee Cunsolo; Ford, James D.; Shiwak, Inez; Wood, Michele	2015	Protective factors for mental health and well-being in a changing climate: Perspectives from Inuit youth in Nunatsiavut, Labrador	SOCIAL SCIENCE & MEDICINE	10.1016/j.socscimed.2015.07.017	WoS	TRUE
1177	Alaazi DA, Masuda JR, Evans J, Distasio J.	2015	Therapeutic landscapes of home: Exploring Indigenous peoples' experiences of a Housing First intervention in Winnipeg	Soc Sci Med	10.1016/j.socscimed.2015.10.057	PubMed	FALSE
1178	Alaazi, Dominic A.; Masuda, Jeffrey R.; Evans, Joshua; Distasio, Jino	2015	Therapeutic landscapes of home: Exploring Indigenous peoples' experiences of a Housing First intervention in Winnipeg	SOCIAL SCIENCE & MEDICINE	10.1016/j.socscimed.2015.10.057	WoS	TRUE
1179	Maclean JC, Popovici I, French MT.	2016	Are natural disasters in early childhood associated with mental health and substance use disorders as an adult?	Soc Sci Med	10.1016/j.socscimed.2016.01.006	PubMed	FALSE
1180	Maclean, Johanna Catherine; Popovici, Ioana; French, Michael T.	2016	Are natural disasters in early childhood associated with mental health and substance use disorders as an adult?	SOCIAL SCIENCE & MEDICINE	10.1016/j.socscimed.2016.01.006	WoS	TRUE
1181	Ellis NR, Albrecht GA.	2017	Climate change threats to family farmers' sense of place and mental wellbeing: A case study from the Western Australian Wheatbelt	Soc Sci Med	10.1016/j.socscimed.2017.01.009	PubMed	FALSE
1182	Ellis, Neville R.; Albrecht, Glenn A.	2017	Climate change threats to family farmers' sense of place and mental wellbeing: A case study from the Western Australian Wheatbelt	SOCIAL SCIENCE & MEDICINE	10.1016/j.socscimed.2017.01.009	WoS	TRUE
1183	Jofre-Bonet M, Serra-Sastre V, Vandoros S.	2018	The impact of the Great Recession on health-related risk factors, behaviour and outcomes in England	Soc Sci Med	10.1016/j.socscimed.2017.12.010	PubMed	FALSE
1184	Jose R, Holman EA, Silver RC.	2019	Community organizations and mental health after the 2013 Boston Marathon bombings	Soc Sci Med	10.1016/j.socscimed.2018.08.019	PubMed	FALSE
1185	Jose, Rupa; Holman, E. Alison; Silver, Roxane Cohen	2019	Community organizations and mental health after the 2013 Boston Marathon bombings	SOCIAL SCIENCE & MEDICINE	10.1016/j.socscimed.2018.08.019	WoS	TRUE
1186	Butler C, Walker-Springett K, Adger WN.	2018	Narratives of recovery after floods: Mental health, institutions, and intervention	Soc Sci Med	10.1016/j.socscimed.2018.09.024	PubMed	FALSE
1187	Butler, Catherine; Walker-Springett, Kate; Adger, W. Neil	2018	Narratives of recovery after floods: Mental health, institutions, and intervention	SOCIAL SCIENCE & MEDICINE	10.1016/j.socscimed.2018.09.024	WoS	TRUE
1188	Reavey P, Brown SD, Kanyeredzi A, McGrath L, Tucker I.	2019	Agents and spectres: Life-space on a medium secure forensic psychiatric unit	Soc Sci Med	10.1016/j.socscimed.2018.11.012	PubMed	FALSE
1189	Reavey, P.; Brown, S. D.; Kanyeredzi, A.; McGrath, L.; Tucker, I.	2019	Agents and spectres: Life-space on a medium secure forensic psychiatric unit	SOCIAL SCIENCE & MEDICINE	10.1016/j.socscimed.2018.11.012	WoS	TRUE
1190	Parry L, Radel C, Adamo SB, Clark N, Counterman M, Flores-Yeffal N, Pons D, Romero-Lankao P, Vargo J.	2019	The (in)visible health risks of climate change	Soc Sci Med	10.1016/j.socscimed.2019.112448	PubMed	FALSE
1191	Wiktorowicz ME, Di Pierdomenico K, Buckley NJ, Lurie S, Czukar G.	2020	Governance of mental healthcare: Fragmented accountability	Soc Sci Med	10.1016/j.socscimed.2020.113007	PubMed	FALSE
1192	Fukasawa M, Kawakami N, Umeda M, Akiyama T, Horikoshi N, Yasumura S, Yabe H, Suzuki Y, Bromet EJ.	2020	Long-lasting effects of distrust in government and science on mental health eight years after the Fukushima nuclear power plant disaster	Soc Sci Med	10.1016/j.socscimed.2020.113108	PubMed	FALSE
1193	Fukasawa, Maiko; Kawakami, Norito; Umeda, Maki; Akiyama, Tsuyoshi; Horikoshi, Naoko; Yasumura, Seiji; Yabe, Hirooki; Suzuki, Yuriko; Bromet, Evelyn J.	2020	Long-lasting effects of distrust in government and science on mental health eight years after the Fukushima nuclear power plant disaster	SOCIAL SCIENCE & MEDICINE	10.1016/j.socscimed.2020.113108	WoS	TRUE
1194	Pakhomov SV, Marino SE, Banks S, Bernick C.	2015	Using Automatic Speech Recognition to Assess Spoken Responses to Cognitive Tests of Semantic Verbal Fluency	Speech Commun	10.1016/j.specom.2015.09.010	PubMed	FALSE
1195	Gevaert, Jessie; De Moortel, Deborah; Wilkens, Mathijn; Vanroelen, Christophe	2018	What's up with the self-employed? A cross-national perspective on the self-employed's work-related mental well-being	SSM-POPULATION HEALTH	10.1016/j.ssmph.2018.04.001	WoS	FALSE
1196	Cope MR, Slack T, Blanchard TC, Lee MR.	2013	Does time heal all wounds? Community attachment, natural resource employment, and health impacts in the wake of the BP Deepwater Horizon disaster	Soc Sci Res	10.1016/j.ssresearch.2012.12.011	PubMed	FALSE
1197	Cope, Michael R.; Slack, Tim; Blanchard, Troy C.; Lee, Matthew R.	2013	Does time heal all wounds? Community attachment, natural resource employment, and health impacts in the wake of the BP Deepwater Horizon disaster	SOCIAL SCIENCE RESEARCH	10.1016/j.ssresearch.2012.12.011	WoS	TRUE
1198	Mauricio D, Alonso N, Gratac??s M.	2020	Chronic Diabetes Complications: The Need to Move beyond Classical Concepts	Trends Endocrinol Metab	10.1016/j.tem.2020.01.007	PubMed	FALSE
1199	Feczko E, Miranda-Dominguez O, Marr M, Graham AM, Nigg JT, Fair DA.	2019	The Heterogeneity Problem: Approaches to Identify Psychiatric Subtypes	Trends Cogn Sci	10.1016/j.tics.2019.03.009	PubMed	FALSE
1200	Cummings J, Reiber C, Kumar P.	2018	The price of progress: Funding and financing Alzheimer's disease drug development	Alzheimers Dement (N Y)	10.1016/j.trci.2018.04.008	PubMed	FALSE
1201	Lagonigro, Raymond; Caries Martori, Joan; Apparicio, Philippe	2018	Environmental noise inequity in the city of Barcelona	TRANSPORTATION RESEARCH PART D-TRANSPORT AND ENVIRONMENT	10.1016/j.trd.2018.06.007	WoS	FALSE
1202	Bennett DA, Yu L, Yang J, Srivastava GP, Aubin C, De Jager PL.	2015	Epigenomics of Alzheimer's disease	Transl Res	10.1016/j.trsl.2014.05.006	PubMed	FALSE
1203	Bennett, David A.; Yu, Lei; Yang, Jingyun; Srivastava, Gyan P.; Aubin, Cristin; De Jager, Philip L.	2015	Epigenomics of Alzheimer's disease	TRANSLATIONAL RESEARCH	10.1016/j.trsl.2014.05.006	WoS	TRUE
1204	Rojas, Juan C.; Sanchez, Nazly E.; Schneider, Ismael; Oliveira, Marcos L. S.; Teixeira, Elba C.; Silva, Luis F. O.	2019	Exposure to nanometric pollutants in primary schools: Environmental implications	URBAN CLIMATE	10.1016/j.uclim.2018.12.011	WoS	FALSE
1205	Roe, Jenny; Aspinall, Peter	2011	The restorative outcomes of forest school and conventional school in young people with good and poor behaviour	URBAN FORESTRY & URBAN GREENING	10.1016/j.ufug.2011.03.003	WoS	FALSE
1206	Memari, Sanaz; Pazhouhanfar, Mandieh; Nourtaghani, Abdolmajid	2017	Relationship between perceived sensory dimensions and stress restoration in care settings	URBAN FORESTRY & URBAN GREENING	10.1016/j.ufug.2017.06.003	WoS	FALSE
1207	Dolling, Ann; Nilsson, Hanna; Lundell, Ylva	2017	Stress recovery in forest or handicraft environments - An intervention study	URBAN FORESTRY & URBAN GREENING	10.1016/j.ufug.2017.07.006	WoS	FALSE
1208	Palsdottir, Anna Maria; Stigsdotter, Ulrika K.; Persson, Dennis; Thorpert, Petra; Grahn, Patrik	2018	The qualities of natural environments that support the rehabilitation process of individuals with stress-related mental disorder in nature-based rehabilitation	URBAN FORESTRY & URBAN GREENING	10.1016/j.ufug.2017.11.016	WoS	FALSE
1209	Dzhambov, Angel M.; Markevych, Iana; Tilov, Boris G.; Dimitrova, Donka D.	2018	Residential greenspace might modify the effect of road traffic noise exposure on general mental health in students	URBAN FORESTRY & URBAN GREENING	10.1016/j.ufug.2018.06.022	WoS	FALSE
1210	Paraskevopoulou, Angeliki T.; Kamperi, Emmanouela; Demiris, Nikos; Economou, Marina; Theleritis, Christos; Kitsonas, Manos; Papageorgiou, Charalabos	2018	The impact of seasonal colour change in planting on patients with psychotic disorders using biosensors	URBAN FORESTRY & URBAN GREENING	10.1016/j.ufug.2018.09.006	WoS	FALSE
1211	Lee, Hyun Jin; Son, Yong-Hoon; Kim, Songyi; Lee, Dong Kun	2019	Healing experiences of middle-aged women through an urban forest therapy program	URBAN FORESTRY & URBAN GREENING	10.1016/j.ufug.2019.01.017	WoS	FALSE
1212	Simkin, Jenni; Ojala, Ann; Tyrvainen, Liisa	2020	Restorative effects of mature and young commercial forests, pristine old-growth forest and urban recreation forest - A field experiment	URBAN FORESTRY & URBAN GREENING	10.1016/j.ufug.2019.126567	WoS	FALSE
1213	Trump DL.	2013	Commentary on "Intermittent versus continuous androgen deprivation in prostate cancer." Hussain M, Tangen CM, Berry DL, Higano CS, Crawford ED, Liu G, Wilding G, Prescott S, Kanaga Sundaram S, Small EJ, Dawson NA, Donnelly BJ, Venner PM, Vaishampayan UN, Schellhammer PF, Quinn DI, Raghavan D, Ely B, Moinpour CM, Vogelzang NJ, Thompson IM Jr., University of Michigan, Division of Hematology/Oncolog…	Urol Oncol	10.1016/j.urolonc.2013.07.020	PubMed	FALSE
1214	Eggener S.	2014	Commentary on "Intermittent versus continuous androgen deprivation in prostate cancer." Hussain M, Tangen CM, Berry DL, Higano CS, Crawford ED, Liu G, Wilding G, Prescott S, Kanaga Sundaram S, Small EJ, Dawson NA, Donnelly BJ, Venner PM, Vaishampayan UN, Schellhammer PF, Quinn DI, Raghavan D, Ely B, Moinpour CM, Vogelzang NJ, Thompson IM Jr, University of Michigan, Division of Hematology/Oncology…	Urol Oncol	10.1016/j.urolonc.2014.01.009	PubMed	FALSE
1215	Mortimer AR.	2010	Mental health response to acute stress following wilderness disaster	Wilderness Environ Med	10.1016/j.wem.2010.06.011	PubMed	FALSE
1216	Mortimer, Amanda R.	2010	Mental Health Response to Acute Stress Following Wilderness Disaster	WILDERNESS & ENVIRONMENTAL MEDICINE	10.1016/j.wem.2010.06.011	WoS	TRUE
1217	Matheson FI, Daoud N, Hamilton-Wright S, Borenstein H, Pedersen C, O'Campo P.	2015	Where Did She Go? The Transformation of Self-Esteem, Self-Identity, and Mental Well-Being among Women Who Have Experienced Intimate Partner Violence	Womens Health Issues	10.1016/j.whi.2015.04.006	PubMed	FALSE
1218	Matheson, Flora I.; Daoud, Nihaya; Hamilton-Wright, Sarah; Borenstein, Heidi; Pedersen, Cheryl; O'Campo, Patricia	2015	Where Did She Go? The Transformation of Self-Esteem, Self-Identity, and Mental Well-Being among Women Who Have Experienced Intimate Partner Violence	WOMENS HEALTH ISSUES	10.1016/j.whi.2015.04.006	WoS	TRUE
1219	Vander Weg MW, Sadler AG, Abrams TE, Richardson K, Torner JC, Syrop CH, Mengeling MA.	2020	Lifetime History of Sexual Assault and Emergency Department Service Use among Women Veterans	Womens Health Issues	10.1016/j.whi.2020.05.003	PubMed	FALSE
1220	Cornips E, Grouls M, Bekelaar K.	2020	Transdural Thoracic Disk Herniation with Longitudinal Slitlike Dural Defect Causing Intracranial Hypotension: Report of 2 Cases	World Neurosurg	10.1016/j.wneu.2020.05.077	PubMed	FALSE
1221	Pailler, Sharon; Tsaneva, Magda	2018	The effects of climate variability on psychological well-being in India	WORLD DEVELOPMENT	10.1016/j.worlddev.2018.01.002	WoS	FALSE
1222	Popkirov S, Jungilligens J, Schlegel U, Wellmer J.	2018	Research on dissociative seizures: A bibliometric analysis and visualization of the scientific landscape	Epilepsy Behav	10.1016/j.yebeh.2018.03.041	PubMed	FALSE
1223	Vasta R, Cerasa A, Sarica A, Bartolini E, Martino I, Mari F, Metitieri T, Quattrone A, Gambardella A, Guerrini R, Labate A.	2018	The application of artificial intelligence to understand the pathophysiological basis of psychogenic nonepileptic seizures	Epilepsy Behav	10.1016/j.yebeh.2018.09.008	PubMed	FALSE
1224	Vasta, Roberta; Cerasa, Antonio; Sarica, Alessia; Bartolini, Emanuele; Martino, Iolanda; Mari, Francesco; Metitieri, Tiziana; Quattrone, Aldo; Gambardella, Antonio; Guerrini, Renzo; Labate, Angelo	2018	The application of artificial intelligence to understand the pathophysiological basis of psychogenic nonepileptic seizures	EPILEPSY & BEHAVIOR	10.1016/j.yebeh.2018.09.008	WoS	TRUE
1225	Ziegler TE, Crockford C.	2017	Neuroendocrine control in social relationships in non-human primates: Field based evidence	Horm Behav	10.1016/j.yhbeh.2017.03.004	PubMed	FALSE
1226	Ziegler, Toni E.; Crockford, Catherine	2017	Neuroendocrine control in social relationships in non-human primates: Field based evidence	HORMONES AND BEHAVIOR	10.1016/j.yhbeh.2017.03.004	WoS	TRUE
1227	Grigsby-Toussaint DS, Turi KN, Krupa M, Williams NJ, Pandi-Perumal SR, Jean-Louis G.	2015	Sleep insufficiency and the natural environment: Results from the US Behavioral Risk Factor Surveillance System survey	Prev Med	10.1016/j.ypmed.2015.07.011	PubMed	FALSE
1228	Grigsby-Toussaint, Diana S.; Turi, Kedir N.; Krupa, Mark; Williams, Natasha J.; Pandi-Perumal, Seithikurippu R.; Jean-Louis, Girardin	2015	Sleep insufficiency and the natural environment: Results from the US Behavioral Risk Factor Surveillance System survey	PREVENTIVE MEDICINE	10.1016/j.ypmed.2015.07.011	WoS	TRUE
1229	Hammett P, Fu SS, Lando HA, Owen G, Okuyemi KS.	2015	The association of military discharge variables with smoking status among homeless Veterans	Prev Med	10.1016/j.ypmed.2015.09.007	PubMed	FALSE
1230	Higgins ST, Kurti AN, Redner R, White TJ, Keith DR, Gaalema DE, Sprague BL, Stanton CA, Roberts ME, Doogan NJ, Priest JS.	2016	Co-occurring risk factors for current cigarette smoking in a U.S. nationally representative sample	Prev Med	10.1016/j.ypmed.2016.02.025	PubMed	FALSE
1231	Kurti AN, Keith DR, Noble A, Priest JS, Sprague B, Higgins ST.	2016	Characterizing the intersection of Co-occurring risk factors for illicit drug abuse and dependence in a U.S. nationally representative sample	Prev Med	10.1016/j.ypmed.2016.09.030	PubMed	FALSE
1232	Gaalema DE, Leventhal AM, Priest JS, Higgins ST.	2018	Understanding individual differences in vulnerability to cigarette smoking is enhanced by attention to the intersection of common risk factors	Prev Med	10.1016/j.ypmed.2018.09.006	PubMed	FALSE
1233	Gaalema, Diann E.; Leventhal, Adam M.; Priest, Jeffrey S.; Higgins, Stephen T.	2018	Understanding individual differences in vulnerability to cigarette smoking is enhanced by attention to the intersection of common risk factors	PREVENTIVE MEDICINE	10.1016/j.ypmed.2018.09.006	WoS	TRUE
1234	Coleman SRM, Gaalema DE, Nighbor TD, Kurti AA, Bunn JY, Higgins ST.	2019	Current cigarette smoking among U.S. college graduates	Prev Med	10.1016/j.ypmed.2019.105853	PubMed	FALSE
1235	Bor J, Venkataramani AS, Williams DR, Tsai AC.	2018	Police killings and their spillover effects on the mental health of black Americans: a population-based, quasi-experimental study	Lancet	10.1016/S0140-6736(18)31130-9	PubMed	FALSE
1236	Bor, Jacob; Venkataramani, Atheendar S.; Williams, David R.; Tsai, Alexander C.	2018	Police killings and their spillover effects on the mental health of black Americans: a population-based, quasi-experimental study	LANCET	10.1016/S0140-6736(18)31130-9	WoS	TRUE
1237	Zhou M, Wang H, Zeng X, Yin P, Zhu J, Chen W, Li X, Wang L, Wang L, Liu Y, Liu J, Zhang M, Qi J, Yu S, Afshin A, Gakidou E, Glenn S, Krish VS, Miller-Petrie MK, Mountjoy-Venning WC, Mullany EC, Redford SB, Liu H, Naghavi M, Hay SI, Wang L, Murray CJL, Liang X.	2019	Mortality, morbidity, and risk factors in China and its provinces, 1990-2017: a systematic analysis for the Global Burden of Disease Study 2017	Lancet	10.1016/S0140-6736(19)30427-1	PubMed	FALSE
1238	Ni H, Yang X, Fang C, Guo Y, Xu M, He Y.	2014	Data mining-based study on sub-mentally healthy state among residents in eight provinces and cities in China	J Tradit Chin Med	10.1016/s0254-6272(15)30055-8	PubMed	FALSE
1239	Ni, Hongmei; Yang, Xuming; Fang, Chengquan; Guo, Yingying; Xu, Mingyue; He, Yumin	2014	Data mining-based study on sub-mentally healthy state among residents in eight provinces and cities in China	JOURNAL OF TRADITIONAL CHINESE MEDICINE	10.1016/S0254-6272(15)30055-8	WoS	FALSE
1240	Coles G, Fuller B, Nordquist K, Weissenberger S, Anderson L, DuBois B.	2010	Three kinds of proactive risk analyses for health care	Jt Comm J Qual Patient Saf	10.1016/s1553-7250(10)36055-7	PubMed	FALSE
1241	O'Malley G.	2011	Aerobic exercise enhances executive function and academic achievement in sedentary, overweight children aged 7-11 years	J Physiother	10.1016/S1836-9553(11)70056-X	PubMed	FALSE
1242	Kagaayi J, Chang LW, Ssempijja V, Grabowski MK, Ssekubugu R, Nakigozi G, Kigozi G, Serwadda DM, Gray RH, Nalugoda F, Sewankambo NK, Nelson L, Mills LA, Kabatesi D, Alamo S, Kennedy CE, Tobian AAR, Santelli JS, Ekstr?�m AM, Nordenstedt H, Quinn TC, Wawer MJ, Reynolds SJ.	2019	Impact of combination HIV interventions on HIV incidence in hyperendemic fishing communities in Uganda: a prospective cohort study	Lancet HIV	10.1016/S2352-3018(19)30190-0	PubMed	FALSE
1243	Ratmann O, Kagaayi J, Hall M, Golubchick T, Kigozi G, Xi X, Wymant C, Nakigozi G, Abeler-D?�rner L, Bonsall D, Gall A, Hoppe A, Kellam P, Bazaale J, Kalibbala S, Laeyendecker O, Lessler J, Nalugoda F, Chang LW, de Oliveira T, Pillay D, Quinn TC, Reynolds SJ, Spencer SEF, Ssekubugu R, Serwadda D, Wawer MJ, Gray RH, Fraser C, Grabowski MK; Rakai Health Sciences Program and the Pangea HIV Consortium.	2020	Quantifying HIV transmission flow between high-prevalence hotspots and surrounding communities: a population-based study in Rakai, Uganda	Lancet HIV	10.1016/S2352-3018(19)30378-9	PubMed	FALSE
1244	Venkataramani AS, Brigell R, O'Brien R, Chatterjee P, Kawachi I, Tsai AC.	2016	Economic opportunity, health behaviours, and health outcomes in the USA: a population-based cross-sectional study	Lancet Public Health	10.1016/S2468-2667(16)30005-6	PubMed	FALSE
1245	Majeed H, Lee J.	2017	The impact of climate change on youth depression and mental health	Lancet Planet Health	10.1016/S2542-5196(17)30045-1	PubMed	FALSE
1246	Majeed, Haris; Lee, Jonathan	2017	The impact of climate change on youth depression and mental health	LANCET PLANETARY HEALTH	10.1016/S2542-5196(17)30045-1	WoS	TRUE
1247	Munro A, Kovats RS, Rubin GJ, Waite TD, Bone A, Armstrong B; English National Study of Flooding and Health Study Group.	2017	Effect of evacuation and displacement on the association between flooding and mental health outcomes: a cross-sectional analysis of UK survey data	Lancet Planet Health	10.1016/S2542-5196(17)30047-5	PubMed	FALSE
1248	Tong S.	2017	Flooding-related displacement and mental health	Lancet Planet Health	10.1016/S2542-5196(17)30062-1	PubMed	FALSE
1249	Tong, Shilu	2017	Flooding-related displacement and mental health	LANCET PLANETARY HEALTH	10.1016/S2542-5196(17)30062-1	WoS	TRUE
1250	Tomita A, Vandormael AM, Cuadros D, Di Minin E, Heikinheimo V, Tanser F, Slotow R, Burns JK.	2017	Green environment and incident depression in South Africa: a geospatial analysis and mental health implications in a resource-limited setting	Lancet Planet Health	10.1016/S2542-5196(17)30063-3	PubMed	FALSE
1251	Helbich M, de Beurs D, Kwan MP, O'Connor RC, Groenewegen PP.	2018	Natural environments and suicide mortality in the Netherlands: a cross-sectional, ecological study	Lancet Planet Health	10.1016/S2542-5196(18)30033-0	PubMed	FALSE
1252	Helbich, Marco; de Beurs, Derek; Kwan, Mei-Po; O'Connor, Rory C.; Groenewegen, Peter P.	2018	Natural environments and suicide mortality in the Netherlands: a cross-sectional, ecological study	LANCET PLANETARY HEALTH	10.1016/S2542-5196(18)30033-0	WoS	TRUE
1253	Sarkar C, Webster C, Gallacher J.	2018	Residential greenness and prevalence of major depressive disorders: a cross-sectional, observational, associational study of 94���879 adult UK Biobank participants	Lancet Planet Health	10.1016/S2542-5196(18)30051-2	PubMed	FALSE
1254	Ji JS, Zhu A, Bai C, Wu CD, Yan L, Tang S, Zeng Y, James P.	2019	Residential greenness and mortality in oldest-old women and men in China: a longitudinal cohort study	Lancet Planet Health	10.1016/S2542-5196(18)30264-X	PubMed	FALSE
1255	Kondo MC, Mueller N, Locke DH, Roman LA, Rojas-Rueda D, Schinasi LH, Gascon M, Nieuwenhuijsen MJ.	2020	Health impact assessment of Philadelphia's 2025 tree canopy cover goals	Lancet Planet Health	10.1016/S2542-5196(20)30058-9	PubMed	FALSE
1256	Ingle HE, Mikulewicz M.	2020	Mental health and climate change: tackling invisible injustice	Lancet Planet Health	10.1016/S2542-5196(20)30081-4	PubMed	FALSE
1257	Alderman K, Turner LR, Tong S.	2013	Assessment of the health impacts of the 2011 summer floods in Brisbane	Disaster Med Public Health Prep	10.1017/dmp.2013.42	PubMed	FALSE
1258	Kreinin A, Shakera T, Sheinkman A, Levi T, Tal V, Polakiewicz J.	2014	Evacuation of a mental health center during a forest fire in Israel	Disaster Med Public Health Prep	10.1017/dmp.2014.53	PubMed	FALSE
1259	Kreinin, Anatoly; Shakera, Tatiana; Sheinkman, Ayala; Levi, Tamar; Tal, Vered; Polakiewicz, Jacob	2014	Evacuation of a Mental Health Center During a Forest Fire in Israel	DISASTER MEDICINE AND PUBLIC HEALTH PREPAREDNESS	10.1017/dmp.2014.53	WoS	TRUE
1260	Reifels L, Bassilios B, Spittal MJ, King K, Fletcher J, Pirkis J.	2015	Patterns and Predictors of Primary Mental Health Service Use Following Bushfire and Flood Disasters	Disaster Med Public Health Prep	10.1017/dmp.2015.23	PubMed	FALSE
1261	Choi KH, Lim MH, Ha M, Sohn JN, Kang JW, Choi YH, Cheong HK.	2016	Psychological Vulnerability of Residents of Communities Affected by the Hebei Spirit Oil Spill	Disaster Med Public Health Prep	10.1017/dmp.2015.68	PubMed	FALSE
1262	Choi, Kyung-Hwa; Lim, Myung-Ho; Ha, Mina; Sohn, Jung Nam; Kang, Jong-Won; Choi, Young-Hyun; Cheong, Hae-Kwan	2016	Psychological Vulnerability of Residents of Communities Affected by the Hebei Spirit Oil Spill	DISASTER MEDICINE AND PUBLIC HEALTH PREPAREDNESS	10.1017/dmp.2015.68	WoS	TRUE
1263	Yoda T, Yokoyama K, Suzuki H, Hirao T.	2017	Relationship Between Long-term Flooding and Serious Mental Illness After the 2011 Flood in Thailand	Disaster Med Public Health Prep	10.1017/dmp.2016.148	PubMed	FALSE
1264	Yoda, Takeshi; Yokoyama, Katsunori; Suzuki, Hiromi; Hirao, Tomohiro	2017	Relationship Between Long-term Flooding and Serious Mental Illness After the 2011 Flood in Thailand	DISASTER MEDICINE AND PUBLIC HEALTH PREPAREDNESS	10.1017/dmp.2016.148	WoS	TRUE
1265	Matsubara C, Murakami H, Imai K, Mizoue T, Akashi H, Miyoshi C, Nakasa T.	2016	Prevalence and Risk Factors for Post-Traumatic Stress Reaction Among Resident Survivors of the Tsunami That Followed the Great East Japan Earthquake, March 11, 2011	Disaster Med Public Health Prep	10.1017/dmp.2016.18	PubMed	FALSE
1266	Matsubara, Chieko; Murakami, Hitoshi; Imai, Koubun; Mizoue, Tetsuya; Akashi, Hidechika; Miyoshi, Chiaki; Nakasa, Tamotsu	2016	Prevalence and Risk Factors for Post-Traumatic Stress Reaction Among Resident Survivors of the Tsunami That Followed the Great East Japan Earthquake, March 11, 2011	DISASTER MEDICINE AND PUBLIC HEALTH PREPAREDNESS	10.1017/dmp.2016.18	WoS	TRUE
1267	Peacock-Chambers E, Del Canto P, Ahlers D, Valdivia Peralta M, Palfrey J.	2017	School-Based Disaster Recovery: Promotion of Children's Mental Health Over the Long Haul	Disaster Med Public Health Prep	10.1017/dmp.2016.200	PubMed	FALSE
1268	Peacock-Chambers, Elizabeth; del Canto, Pilar; Ahlers, Douglas; Valdivia Peralta, Mario; Palfrey, Judith	2017	School-Based Disaster Recovery: Promotion of Children's Mental Health Over the Long Haul	DISASTER MEDICINE AND PUBLIC HEALTH PREPAREDNESS	10.1017/dmp.2016.200	WoS	TRUE
1269	Lin S, Lu Y, Justino J, Dong G, Lauper U.	2016	What Happened to Our Environment and Mental Health as a Result of Hurricane Sandy?	Disaster Med Public Health Prep	10.1017/dmp.2016.51	PubMed	FALSE
1270	Hall G, Jessup J, Lim S, Olson D, Seligson AL, He FT, De La Cruz N, Gwynn C.	2016	Spatial Shift in the Utilization of Mental Health Services After Hurricane Sandy Among New York City Residents Enrolled in Medicaid	Disaster Med Public Health Prep	10.1017/dmp.2016.58	PubMed	FALSE
1271	Hall, Gerod; Jessup, Jillian; Lim, Sungwoo; Olson, Donald; Seligson, Amber Levanon; He, Fangtao Tony; De La Cruz, Nneka; Gwynn, Charon	2016	Spatial Shift in the Utilization of Mental Health Services After Hurricane Sandy Among New York City Residents Enrolled in Medicaid	DISASTER MEDICINE AND PUBLIC HEALTH PREPAREDNESS	10.1017/dmp.2016.58	WoS	TRUE
1272	He FT, Lundy De La Cruz N, Olson D, Lim S, Levanon Seligson A, Hall G, Jessup J, Gwynn C.	2016	Temporal and Spatial Patterns in Utilization of Mental Health Services During and After Hurricane Sandy: Emergency Department and Inpatient Hospitalizations in New York City	Disaster Med Public Health Prep	10.1017/dmp.2016.89	PubMed	FALSE
1273	He, Fangtao Tony; De La Cruz, Nneka Lundy; Olson, Donald; Lim, Sungwoo; Seligson, Amber Levanon; Hall, Gerod; Jessup, Jillian; Gwynn, Charon	2016	Temporal and Spatial Patterns in Utilization of Mental Health Services During and After Hurricane Sandy: Emergency Department and Inpatient Hospitalizations in New York City	DISASTER MEDICINE AND PUBLIC HEALTH PREPAREDNESS	10.1017/dmp.2016.89	WoS	TRUE
1274	Hetherington E, McDonald S, Wu M, Tough S.	2018	Risk and Protective Factors for Mental Health and Community Cohesion After the 2013 Calgary Flood	Disaster Med Public Health Prep	10.1017/dmp.2017.91	PubMed	FALSE
1275	Leser KA, Looper-Coats J, Roszak AR.	2019	Emergency Preparedness Plans and Perceptions Among a Sample of United States Childcare Providers	Disaster Med Public Health Prep	10.1017/dmp.2018.145	PubMed	FALSE
1276	Leser, Kendall A.; Looper-Coats, Julie; Roszak, Andrew R.	2019	Emergency Preparedness Plans and Perceptions Among a Sample of United States Childcare Providers	DISASTER MEDICINE AND PUBLIC HEALTH PREPAREDNESS	10.1017/dmp.2018.145	WoS	TRUE
1277	Shultz JM, Rechkemmer A, Rai A, McManus KT.	2019	Public Health and Mental Health Implications of Environmentally Induced Forced Migration	Disaster Med Public Health Prep	10.1017/dmp.2018.27	PubMed	FALSE
1278	Shultz, James M.; Rechkemmer, Andreas; Rai, Abha; McManus, Katherine T.	2019	Public Health and Mental Health Implications of Environmentally Induced Forced Migration	DISASTER MEDICINE AND PUBLIC HEALTH PREPAREDNESS	10.1017/dmp.2018.27	WoS	TRUE
1279	Kreinin A, Lyansberg A, Yusupov M, Moran DS.	2019	Fire Disaster Readiness: Preparation for the Evacuation of Medical Facilities During Fires in Haifa, Israel, 2016	Disaster Med Public Health Prep	10.1017/dmp.2018.53	PubMed	FALSE
1280	Kreinin, Anatoly; Lyansberg, Alexey; Yusupov, Miriam; Moran, Daniel S.	2019	Fire Disaster Readiness: Preparation for the Evacuation of Medical Facilities During Fires in Haifa, Israel, 2016	DISASTER MEDICINE AND PUBLIC HEALTH PREPAREDNESS	10.1017/dmp.2018.53	WoS	TRUE
1281	Ayer L, Engel C, Parker A, Seelam R, Ramchand R.	2019	Behavioral Health of Gulf Coast Residents 6 Years After the Deepwater Horizon Oil Spill: The Role of Trauma History	Disaster Med Public Health Prep	10.1017/dmp.2018.84	PubMed	FALSE
1282	Ayer, Lynsay; Engel, Charles; Parker, Andrew; Seelam, Rachana; Ramchand, Rajeev	2019	Behavioral Health of Gulf Coast Residents 6 Years After the Deepwater Horizon Oil Spill: The Role of Trauma History	DISASTER MEDICINE AND PUBLIC HEALTH PREPAREDNESS	10.1017/dmp.2018.84	WoS	TRUE
1283	Jang S, Ekyalongo Y, Kim H.	2020	Systematic Review of Displacement and Health Impact From Natural Disasters in Southeast Asia	Disaster Med Public Health Prep	10.1017/dmp.2019.125	PubMed	FALSE
1284	Bevilacqua K, Rasul R, Schneider S, Guzman M, Nepal V, Banerjee D, Schulte J, Schwartz RM.	2020	Understanding Associations Between Hurricane Harvey Exposure and Mental Health Symptoms Among Greater Houston-Area Residents	Disaster Med Public Health Prep	10.1017/dmp.2019.141	PubMed	FALSE
1285	Bevilacqua, Kristin; Rasul, Rehana; Schneider, Samantha; Guzman, Maria; Nepal, Vishnu; Banerjee, Deborah; Schulte, Joann; Schwartz, Rebecca M.	2020	Understanding Associations Between Hurricane Harvey Exposure and Mental Health Symptoms Among Greater Houston-Area Residents	DISASTER MEDICINE AND PUBLIC HEALTH PREPAREDNESS	10.1017/dmp.2019.141	WoS	TRUE
1286	Ramchand R, Seelam R, Parks V, Ghosh-Dastidar B, Lee MR, Finucane M.	2019	Exposure to the Deepwater Horizon Oil Spill, Associated Resource Loss, and Long-Term Mental and Behavioral Outcomes	Disaster Med Public Health Prep	10.1017/dmp.2019.3	PubMed	FALSE
1287	Ramchand, Rajeev; Seelam, Rachana; Parks, Vanessa; Ghosh-Dastidar, Bonnie; Lee, Matthew R.; Finucane, Melissa	2019	Exposure to the Deepwater Horizon Oil Spill, Associated Resource Loss, and Long-Term Mental and Behavioral Outcomes	DISASTER MEDICINE AND PUBLIC HEALTH PREPAREDNESS	10.1017/dmp.2019.3	WoS	TRUE
1288	Ritchie A, Sautner B, Omege J, Denga E, Nwaka B, Akinjise I, Corbett SE, Moosavi S, Greenshaw A, Chue P, Li XM, Agyapong VIO.	2020	Long-Term Mental Health Effects of a Devastating Wildfire Are Amplified by Sociodemographic and Clinical Antecedents in College Students	Disaster Med Public Health Prep	10.1017/dmp.2020.87	PubMed	FALSE
1289	Jenkins R, Othieno C, Ongeri L, Ogutu B, Sifuna P, Mboroki J, Omollo R.	2015	Attention deficit hyperactivity disorder symptom self-report in adults in Kenya and its associated risk factors, an analysis from a household survey in a demographic surveillance site	Glob Ment Health (Camb)	10.1017/gmh.2015.14	PubMed	FALSE
1290	Contreras C, Aguilar M, Eappen B, Guzm?�n C, Carrasco P, Millones AK, Galea JT.	2018	Community strengthening and mental health system linking after flooding in two informal human settlements in Peru: a model for small-scale disaster response	Glob Ment Health (Camb)	10.1017/gmh.2017.33	PubMed	FALSE
1291	Contreras, C.; Aguilar, M.; Eappen, B.; Guzman, C.; Carrasco, P.; Millones, A. K.; Galea, J. T.	2018	Community strengthening and mental health system linking after flooding in two informal human settlements in Peru: a model for small-scale disaster response	GLOBAL MENTAL HEALTH	10.1017/gmh.2017.33	WoS	TRUE
1292	Brown FL, Mishra T, Frounfelker RL, Bhargava E, Gautam B, Prasai A, Betancourt TS.	2019	'Hiding their troubles': a qualitative exploration of suicide in Bhutanese refugees in the USA	Glob Ment Health (Camb)	10.1017/gmh.2018.34	PubMed	FALSE
1293	Brown, F. L.; Mishra, T.; Frounfelker, R. L.; Bhargava, E.; Gautam, B.; Prasai, A.; Betancourt, T. S.	2019	'Hiding their troubles': a qualitative exploration of suicide in Bhutanese refugees in the USA	GLOBAL MENTAL HEALTH	10.1017/gmh.2018.34	WoS	TRUE
1294	Bitta MA, Kariuki SM, Omar A, Nasoro L, Njeri M, Kiambu C, Ongeri L, Newton CRJC.	2020	Contextualizing and pilot testing the Mental Health Gap Action Programme Intervention Guide (mhGAP-IG) to primary healthcare workers in Kilifi, Kenya	Glob Ment Health (Camb)	10.1017/gmh.2020.6	PubMed	FALSE
1295	Bitta, Mary A.; Kariuki, Symon M.; Omar, Anisa; Nasoro, Leonard; Njeri, Monica; Kiambu, Cyprian; Ongeri, Linnet; Newton, Charles R. J. C.	2020	Contextualizing and pilot testing the Mental Health Gap Action Programme Intervention Guide (mhGAP-IG) to primary healthcare workers in Kilifi, Kenya	GLOBAL MENTAL HEALTH	10.1017/gmh.2020.6	WoS	TRUE
1296	Montgomery L, Donnelly M.	2014	A scoping review of the literature on the involvement of service users in personality disorder services	Ir J Psychol Med	10.1017/ipm.2014.46	PubMed	FALSE
1297	Fearon P.	2020	Opening up while locking down: how an Irish independent sector mental health service is responding to the COVID-19 crisis?	Ir J Psychol Med	10.1017/ipm.2020.68	PubMed	FALSE
1298	Keane KM, Haskell-Ramsay CF, Veasey RC, Howatson G.	2016	Montmorency Tart cherries (Prunus cerasus L.) modulate vascular function acutely, in the absence of improvement in cognitive performance	Br J Nutr	10.1017/S0007114516004177	PubMed	FALSE
1299	Fisk J, Khalid S, Reynolds SA, Williams CM.	2020	Effect of 4 weeks daily wild blueberry supplementation on symptoms of depression in adolescents	Br J Nutr	10.1017/S0007114520000926	PubMed	FALSE
1300	Fisk, Jeni; Khalid, Sundus; Reynolds, Shirley A.; Williams, Claire M.	2020	Effect of 4 weeks daily wild blueberry supplementation on symptoms of depression in adolescents	BRITISH JOURNAL OF NUTRITION	10.1017/S0007114520000926	WoS	TRUE
1301	Penner, D'Ann R.	2010	Assault Rifles, Separated Families, and Murder in Their Eyes: Unasked Questions after Hurricane Katrina	JOURNAL OF AMERICAN STUDIES	10.1017/S0021875810001246	WoS	FALSE
1302	Vlasova, Tatiana; Volkov, Sergey	2013	Methodology of socially-oriented observations and the possibilities of their implementation in the Arctic resilience assessment	POLAR RECORD	10.1017/S0032247413000119	WoS	FALSE
1303	Page LA, Howard LM.	2010	The impact of climate change on mental health (but will mental health be discussed at Copenhagen?)	Psychol Med	10.1017/s0033291709992169	PubMed	FALSE
1304	Page, L. A.; Howard, L. M.	2010	The impact of climate change on mental health (but will mental health be discussed at Copenhagen?)	PSYCHOLOGICAL MEDICINE	10.1017/S0033291709992169	WoS	FALSE
1305	Wardenaar KJ, van Loo HM, Cai T, Fava M, Gruber MJ, Li J, de Jonge P, Nierenberg AA, Petukhova MV, Rose S, Sampson NA, Schoevers RA, Wilcox MA, Alonso J, Bromet EJ, Bunting B, Florescu SE, Fukao A, Gureje O, Hu C, Huang YQ, Karam AN, Levinson D, Medina Mora ME, Posada-Villa J, Scott KM, Taib NI, Viana MC, Xavier M, Zarkov Z, Kessler RC.	2014	The effects of co-morbidity in defining major depression subtypes associated with long-term course and severity	Psychol Med	10.1017/S0033291714000993	PubMed	FALSE
1306	Rosellini AJ, Monahan J, Street AE, Heeringa SG, Hill ED, Petukhova M, Reis BY, Sampson NA, Bliese P, Schoenbaum M, Stein MB, Ursano RJ, Kessler RC.	2016	Predicting non-familial major physical violent crime perpetration in the US Army from administrative data	Psychol Med	10.1017/S0033291715001774	PubMed	FALSE
1307	Rosellini, A. J.; Monahan, J.; Street, A. E.; Heeringa, S. G.; Hill, E. D.; Petukhova, M.; Reis, B. Y.; Sampson, N. A.; Bliese, P.; Schoenbaum, M.; Stein, M. B.; Ursano, R. J.; Kessler, R. C.	2016	Predicting non-familial major physical violent crime perpetration in the US Army from administrative data	PSYCHOLOGICAL MEDICINE	10.1017/S0033291715001774	WoS	TRUE
1308	Fengler S, Roeske S, Heber I, Reetz K, Schulz JB, Riedel O, Wittchen HU, Storch A, Linse K, Baudrexel S, Hilker R, Mollenhauer B, Witt K, Schmidt N, Balzer-Geldsetzer M, Dams J, Dodel R, Gr?�ber S, Pilotto A, Petrelli A, F??nkele S, Kassubek J, Kalbe E.	2016	Verbal memory declines more in female patients with Parkinson's disease: the importance of gender-corrected normative data	Psychol Med	10.1017/S0033291716000908	PubMed	FALSE
1309	Fengler, S.; Roeske, S.; Heber, I.; Reetz, K.; Schulz, J. B.; Riedel, O.; Wittchen, H. U.; Storch, A.; Linse, K.; Baudrexel, S.; Hilker, R.; Mollenhauer, B.; Witt, K.; Schmidt, N.; Balzer-Geldsetzer, M.; Dams, J.; Dodel, R.; Graeber, S.; Pilotto, A.; Petrelli, A.; Fuenkele, S.; Kassubek, J.; Kalbe, E.	2016	Verbal memory declines more in female patients with Parkinson's disease: the importance of gender-corrected normative data	PSYCHOLOGICAL MEDICINE	10.1017/S0033291716000908	WoS	TRUE
1310	Generaal E, Timmermans EJ, Dekkers JEC, Smit JH, Penninx BWJH.	2019	Not urbanization level but socioeconomic, physical and social neighbourhood characteristics are associated with presence and severity of depressive and anxiety disorders	Psychol Med	10.1017/S0033291718000612	PubMed	FALSE
1311	Chin WY, Wan EYF, Dowrick C, Arroll B, Lam CLK.	2019	Tree analysis modeling of the associations between PHQ-9 depressive symptoms and doctor diagnosis of depression in primary care	Psychol Med	10.1017/S0033291718001058	PubMed	FALSE
1312	Chin, Weng-Yee; Wan, Eric Yuk Fai; Dowrick, Christopher; Arroll, Bruce; Lam, Cindy Lo Kuen	2019	Tree analysis modeling of the associations between PHQ-9 depressive symptoms and doctor diagnosis of depression in primary care	PSYCHOLOGICAL MEDICINE	10.1017/S0033291718001058	WoS	TRUE
1313	Pearson R, Pisner D, Meyer B, Shumake J, Beevers CG.	2019	A machine learning ensemble to predict treatment outcomes following an Internet intervention for depression	Psychol Med	10.1017/S003329171800315X	PubMed	FALSE
1314	Pearson, Rahel; Pisner, Derek; Meyer, Bjorn; Shumake, Jason; Beevers, Christopher G.	2019	A machine learning ensemble to predict treatment outcomes following an Internet intervention for depression	PSYCHOLOGICAL MEDICINE	10.1017/S003329171800315X	WoS	TRUE
1315	Shatte ABR, Hutchinson DM, Teague SJ.	2019	Machine learning in mental health: a scoping review of methods and applications	Psychol Med	10.1017/S0033291719000151	PubMed	FALSE
1316	Shatte, Adrian B. R.; Hutchinson, Delyse M.; Teague, Samantha J.	2019	Machine learning in mental health: a scoping review of methods and applications	PSYCHOLOGICAL MEDICINE	10.1017/S0033291719000151	WoS	TRUE
1317	James LE, Welton-Mitchell C, Noel JR, James AS.	2020	Integrating mental health and disaster preparedness in intervention: a randomized controlled trial with earthquake and flood-affected communities in Haiti	Psychol Med	10.1017/S0033291719000163	PubMed	FALSE
1318	James, Leah Emily; Welton-Mitchell, Courtney; Noel, John Roger; James, Alexander Scott	2020	Integrating mental health and disaster preparedness in intervention: a randomized controlled trial with earthquake and flood-affected communities in Haiti	PSYCHOLOGICAL MEDICINE	10.1017/S0033291719000163	WoS	TRUE
1319	Milligan, C.; Payne, S.; Bingley, A.; Cockshott, Z.	2015	Place and wellbeing: shedding light on activity interventions for older men	AGEING & SOCIETY	10.1017/S0144686X13000494	WoS	FALSE
1320	Pace J.	2020	"Place-ing" Dementia Prevention and Care in NunatuKavut, Labrador	Can J Aging	10.1017/S0714980819000576	PubMed	FALSE
1321	Pace, Jessica	2020	Place-ing Dementia Prevention and Care in NunatuKavut, Labrador	CANADIAN JOURNAL ON AGING-REVUE CANADIENNE DU VIEILLISSEMENT	10.1017/S0714980819000576	WoS	TRUE
1322	Moffitt TE; Klaus-Grawe 2012 Think Tank.	2013	Childhood exposure to violence and lifelong health: clinical intervention science and stress-biology research join forces	Dev Psychopathol	10.1017/S0954579413000801	PubMed	FALSE
1323	Moffitt, Terrie E.	2013	Childhood exposure to violence and lifelong health: Clinical intervention science and stress-biology research join forces	DEVELOPMENT AND PSYCHOPATHOLOGY	10.1017/S0954579413000801	WoS	TRUE
1324	Shonkoff JP, Fisher PA.	2013	Rethinking evidence-based practice and two-generation programs to create the future of early childhood policy	Dev Psychopathol	10.1017/S0954579413000813	PubMed	FALSE
1325	Panayiotou M, Humphrey N.	2018	Mental health difficulties and academic attainment: Evidence for gender-specific developmental cascades in middle childhood	Dev Psychopathol	10.1017/S095457941700102X	PubMed	FALSE
1326	Panayiotou, Margarita; Humphrey, Neil	2018	Mental health difficulties and academic attainment: Evidence for gender-specific developmental cascades in middle childhood	DEVELOPMENT AND PSYCHOPATHOLOGY	10.1017/S095457941700102X	WoS	TRUE
1327	Jacobsen E, Ran X, Liu A, Chang CH, Ganguli M.	2020	Predictors of attrition in a longitudinal population-based study of aging	Int Psychogeriatr	10.1017/S1041610220000447	PubMed	FALSE
1328	Sharma R, Hossain M, Pawar P, Sharma S.	2020	Air pollution and geriatric mental health: perspectives on the COVID-19 pandemic	Int Psychogeriatr	10.1017/S1041610220001428	PubMed	FALSE
1329	Du W, FitzGerald GJ, Clark M, Hou XY.	2010	Health impacts of floods	Prehosp Disaster Med	10.1017/s1049023x00008141	PubMed	FALSE
1330	Raguenaud ME, Germonneau P, Leseigneur J, Chavagnat JJ, Motreff Y, Vivier-Darrigol M, Pirard P.	2012	Epidemiological surveillance linked to an outreach psychological support program after the Xynthia storm in Charente-Maritime, France, 2010	Prehosp Disaster Med	10.1017/S1049023X12001082	PubMed	FALSE
1331	Raguenaud, Marie-Eve; Germonneau, Philippe; Leseigneur, Jackie; Chavagnat, Jean Jacques; Motreff, Yvon; Vivier-Darrigol, Martine; Pirard, Philippe	2012	Epidemiological Surveillance Linked to an Outreach Psychological Support Program after the Xynthia Storm in Charente-Maritime, France, 2010	PREHOSPITAL AND DISASTER MEDICINE	10.1017/S1049023X12001082	WoS	TRUE
1332	Buttke D, Vagi S, Bayleyegn T, Sircar K, Strine T, Morrison M, Allen M, Wolkin A.	2012	Mental health needs assessment after the Gulf Coast oil spill-Alabama and Mississippi, 2010	Prehosp Disaster Med	10.1017/S1049023X12001100	PubMed	FALSE
1333	Buttke, Danielle; Vagi, Sara; Bayleyegn, Tesfaye; Sircar, Kanta; Strine, Tara; Morrison, Melissa; Allen, Mardi; Wolkin, Amy	2012	Mental Health Needs Assessment After the Gulf Coast Oil Spill-Alabama and Mississippi, 2010	PREHOSPITAL AND DISASTER MEDICINE	10.1017/S1049023X12001100	WoS	TRUE
1334	Buttke, Danielle; Vagi, Sara; Schnall, Amy; Bayleyegn, Tesfaye; Morrison, Melissa; Allen, Mardi; Wolkin, Amy	2012	Community Assessment for Public Health Emergency Response (CASPER) One Year Following the Gulf Coast Oil Spill: Alabama and Mississippi, 2011	PREHOSPITAL AND DISASTER MEDICINE	10.1017/S1049023X12001380	WoS	FALSE
1335	Wind TR, Joshi PC, Kleber RJ, Komproe IH.	2013	The impact of recurrent disasters on mental health: a study on seasonal floods in northern India	Prehosp Disaster Med	10.1017/S1049023X13000290	PubMed	FALSE
1336	Motreff Y, Pirard P, Goria S, Labrador B, Gourier-Fr?�ry C, Nicolau J, Le Tertre A, Chan-Chee C.	2013	Increase in psychotropic drug deliveries after the Xynthia storm, France, 2010	Prehosp Disaster Med	10.1017/S1049023X13008662	PubMed	FALSE
1337	Motreff, Yvon; Pirard, Philippe; Goria, Sarah; Labrador, Boris; Gourier-Frery, Claire; Nicolau, Javier; Le Tertre, Alain; Chan-Chee, Christine	2013	Increase in Psychotropic Drug Deliveries after the Xynthia Storm, France, 2010	PREHOSPITAL AND DISASTER MEDICINE	10.1017/S1049023X13008662	WoS	TRUE
1338	Warsini, Sri; Mills, Jane; Usher, Kim	2014	Solastalgia: Living with the Environmental Damage Caused By Natural Disasters	PREHOSPITAL AND DISASTER MEDICINE	10.1017/S1049023X13009266	WoS	FALSE
1339	Saulnier DD, Brolin Ribacke K, von Schreeb J.	2017	No Calm After the Storm: A Systematic Review of Human Health Following Flood and Storm Disasters	Prehosp Disaster Med	10.1017/S1049023X17006574	PubMed	FALSE
1340	Saulnier, Dell D.; Ribacke, Kim Brolin; von Schreeb, Johan	2017	No Calm After the Storm: A Systematic Review of Human Health Following Flood and Storm Disasters	PREHOSPITAL AND DISASTER MEDICINE	10.1017/S1049023X17006574	WoS	TRUE
1341	Ryan BJ, Franklin RC, Burkle FM, Smith EC, Aitken P, Leggat PA.	2019	Determining Key Influences on Patient Ability to Successfully Manage Noncommunicable Disease After Natural Disaster	Prehosp Disaster Med	10.1017/S1049023X1900431X	PubMed	FALSE
1342	Ryan, Benjamin J.; Franklin, Richard C.; Burkle, Frederick M., Jr.; Smith, Erin C.; Aitken, Peter; Leggat, Peter A.	2019	Determining Key Influences on Patient Ability to Successfully Manage Noncommunicable Disease After Natural Disaster	PREHOSPITAL AND DISASTER MEDICINE	10.1017/S1049023X1900431X	WoS	TRUE
1343	Smith EC, Holmes L, Burkle FM.	2019	Exploring the Physical and Mental Health Challenges Associated with Emergency Service Call-Taking and Dispatching: A Review of the Literature	Prehosp Disaster Med	10.1017/S1049023X19004990	PubMed	FALSE
1344	Smith, Erin C.; Holmes, Lisa; Burkle, Frederick M., Jr.	2019	Exploring the Physical and Mental Health Challenges Associated with Emergency Service Call-Taking and Dispatching: A Review of the Literature	PREHOSPITAL AND DISASTER MEDICINE	10.1017/S1049023X19004990	WoS	TRUE
1345	Ventriglio A, Torales J, Castaldelli-Maia JM, De Berardis D, Bhugra D.	2020	Urbanization and emerging mental health issues	CNS Spectr	10.1017/S1092852920001236	PubMed	FALSE
1346	Ventriglio A, Bellomo A, di Gioia I, Di Sabatino D, Favale D, De Berardis D, Cianconi P.	2020	Environmental pollution and mental health: a narrative review of literature	CNS Spectr	10.1017/S1092852920001303	PubMed	FALSE
1347	Warnock-Parkes, Emma	2017	Erosion: The Psychopathology of Self-Criticism	BEHAVIOURAL AND COGNITIVE PSYCHOTHERAPY	10.1017/S1352465817000212	WoS	FALSE
1348	Sandry J, Paxton J, Sumowski JF.	2016	General Mathematical Ability Predicts PASAT Performance in MS Patients: Implications for Clinical Interpretation and Cognitive Reserve	J Int Neuropsychol Soc	10.1017/S1355617715001307	PubMed	FALSE
1349	Sandry, Joshua; Paxton, Jessica; Sumowski, James F.	2016	General Mathematical Ability Predicts PASAT Performance in MS Patients: Implications for Clinical Interpretation and Cognitive Reserve	JOURNAL OF THE INTERNATIONAL NEUROPSYCHOLOGICAL SOCIETY	10.1017/S1355617715001307	WoS	TRUE
1350	Maughan DL, Patel A, Parveen T, Braithwaite I, Cook J, Lillywhite R, Cooke M.	2016	Primary-care-based social prescribing for mental health: an analysis of financial and environmental sustainability	Prim Health Care Res Dev	10.1017/S1463423615000328	PubMed	FALSE
1351	Maughan, Daniel L.; Patel, Alisha; Parveen, Tahmina; Braithwaite, Isobel; Cook, Jonathan; Lillywhite, Rob; Cooke, Matthew	2016	Primary-care-based social prescribing for mental health: an analysis of financial and environmental sustainability	PRIMARY HEALTH CARE RESEARCH AND DEVELOPMENT	10.1017/S1463423615000328	WoS	TRUE
1352	William, Jananie; Chojenta, Catherine; Martin, Michael A.; Loxton, Deborah	2019	An actuarial investigation into maternal out-of-hospital cost risk factors	ANNALS OF ACTUARIAL SCIENCE	10.1017/S1748499518000015	WoS	FALSE
1353	Burns JK.	2015	Poverty, inequality and a political economy of mental health	Epidemiol Psychiatr Sci	10.1017/S2045796015000086	PubMed	FALSE
1354	Samele C, Urqu?�a N.	2015	Psychiatric inpatient care: where do we go from here?	Epidemiol Psychiatr Sci	10.1017/S2045796015000591	PubMed	FALSE
1355	Samele, C.; Urquia, N.	2015	Psychiatric inpatient care: where do we go from here?	EPIDEMIOLOGY AND PSYCHIATRIC SCIENCES	10.1017/S2045796015000591	WoS	TRUE
1356	Faupin S.	2017	Auguste Forestier's unbroken wanderlust	Epidemiol Psychiatr Sci	10.1017/S2045796016000901	PubMed	FALSE
1357	Faupin, Savine	2017	Auguste Forestier's unbroken wanderlust	EPIDEMIOLOGY AND PSYCHIATRIC SCIENCES	10.1017/S2045796016000901	WoS	TRUE
1358	Caye A, Agnew-Blais J, Arseneault L, Gon?�alves H, Kieling C, Langley K, Menezes AMB, Moffitt TE, Passos IC, Rocha TB, Sibley MH, Swanson JM, Thapar A, Wehrmeister F, Rohde LA.	2019	A risk calculator to predict adult attention-deficit/hyperactivity disorder: generation and external validation in three birth cohorts and one clinical sample	Epidemiol Psychiatr Sci	10.1017/S2045796019000283	PubMed	FALSE
1359	Tay AK, Miah MAA, Khan S, Badrudduza M, Morgan K, Balasundaram S, Silove D.	2019	Theoretical background, first stage development and adaptation of a novel Integrative Adapt Therapy (IAT) for refugees	Epidemiol Psychiatr Sci	10.1017/S2045796019000416	PubMed	FALSE
1360	Bernardini F, Attademo L, Trezzi R, Gobbicchi C, Balducci PM, Del Bello V, Menculini G, Pauselli L, Piselli M, Sciarma T, Moretti P, Tamantini A, Quartesan R, Compton MT, Tortorella A.	2019	Air pollutants and daily number of admissions to psychiatric emergency services: evidence for detrimental mental health effects of ozone	Epidemiol Psychiatr Sci	10.1017/S2045796019000623	PubMed	FALSE
1361	Rock D, Cross SP.	2020	Regional planning for meaningful person-centred care in mental health: context is the signal not the noise	Epidemiol Psychiatr Sci	10.1017/S2045796020000153	PubMed	FALSE
1362	Rock, D.; Cross, S. P.	2020	Regional planning for meaningful person-centred care in mental health: context is the signal not the noise	EPIDEMIOLOGY AND PSYCHIATRIC SCIENCES	10.1017/S2045796020000153	WoS	TRUE
1363	Smit DJ, Boomsma DI, Schnack HG, Hulshoff Pol HE, de Geus EJ.	2012	Individual differences in EEG spectral power reflect genetic variance in gray and white matter volumes	Twin Res Hum Genet	10.1017/thg.2012.6	PubMed	FALSE
1364	Smit, Dirk J. A.; Boomsma, Dorret I.; Schnack, Hugo G.; Pol, Hilleke E. Hulshoff; de Geus, Eco J. C.	2012	Individual Differences in EEG Spectral Power Reflect Genetic Variance in Gray and White Matter Volumes	TWIN RESEARCH AND HUMAN GENETICS	10.1017/thg.2012.6	WoS	TRUE
1365	Dick DM.	2018	Mapping Risk from Genes to Behavior: The Enduring and Evolving Influence of Irving Gottesman's Endophenotype Concept	Twin Res Hum Genet	10.1017/thg.2018.35	PubMed	FALSE
1366	Ziarrusta H, Mijangos L, Izagirre U, Plassmann MM, Benskin JP, Anakabe E, Olivares M, Zuloaga O.	2017	Bioconcentration and Biotransformation of Amitriptyline in Gilt-Head Bream	Environ Sci Technol	10.1021/acs.est.6b05831	PubMed	FALSE
1367	Ziarrusta, Haizea; Mijangos, Leire; Izagirre, Urtzi; Plassmann, Merle M.; Benskin, Jonathan P.; Anakabe, Eneritz; Olivares, Maitane; Zuloaga, Olatz	2017	Bioconcentration and Biotransformation of Amitriptyline in Gilt-Head Bream	ENVIRONMENTAL SCIENCE & TECHNOLOGY	10.1021/acs.est.6b05831	WoS	TRUE
1368	Zheng X, Liu D, Roychaudhuri R, Teplow DB, Bowers MT.	2015	Amyloid ??-Protein Assembly: Differential Effects of the Protective A2T Mutation and Recessive A2V Familial Alzheimer's Disease Mutation	ACS Chem Neurosci	10.1021/acschemneuro.5b00171	PubMed	FALSE
1369	Zheng, Xueyun; Liu, Deyu; Roychaudhuri, Robin; Teplow, David B.; Bowers, Michael T.	2015	Amyloid beta-Protein Assembly: Differential Effects of the Protective A2T Mutation and Recessive A2V Familial Alzheimer's Disease Mutation	ACS CHEMICAL NEUROSCIENCE	10.1021/acschemneuro.5b00171	WoS	TRUE
1370	Das P, Chacko AR, Belfort G.	2017	Alzheimer's Protective Cross-Interaction between Wild-Type and A2T Variants Alters A??(42) Dimer Structure	ACS Chem Neurosci	10.1021/acschemneuro.6b00357	PubMed	FALSE
1371	Das, Payel; Chacko, Anita R.; Belfort, Georges	2017	Alzheimer's Protective Cross-Interaction between Wild-Type and A2T Variants Alters A beta(42) Dimer Structure	ACS CHEMICAL NEUROSCIENCE	10.1021/acschemneuro.6b00357	WoS	TRUE
[truncated: 2,362 more rows]
