# Supplementary material for: The Contribution of Environmental Science to Mental Health Research: A Scoping Review
Source: Int J Environ Res Public Health. 2023 Mar 27;20(7):5278. doi: 10.3390/ijerph20075278 (PMC10094550; doi:10.3390/ijerph20075278)
Supplement: Supplementary file 1 [file ijerph-20-05278-s001.zip › Table S4 - Title Screening - Supplementary Materials.xlsx]

## Sheet: Table S4
		Title screening of record for scoping reivew of environmental science contribution to mental health research. Carried out by MR, with inter-rater reliability with MC on 10% of papers 96%. Potentially relevent papers taken forward to abstract screening.
Paper ID code	Authors	Year	Title	Rejected: Mental health scope	Rejected: Environmental Science scope	Rejected: Review paper	Rejected: Opinion paper	Rejected: Descriptive paper	Rejected: non-human	Rejected: other	Potentially relevant	COVID paper	Comments	DOI
aboujaoude2020a	Aboujaoude E, Gega L.	2020	From Digital Mental Health Interventions to Digital "Addiction": Where the Two Fields Converge	n	n	n	n	n	n	n	y	n		10.1037/dev0000313
abraham2017	Abraham TH, Koenig CJ, Zamora K, Hill C, Uddo M, Kelly AP, Hamilton MF, Curran GM, Pyne JM, Seal KH.	2017	Situating mental health work in place: Qualitative findings from interviews with Veterans in Southeastern Louisiana and Northern California	n	n	n	n	n	n	n	y	n		10.3109/01612840.2013.816398
abu2018	Abu-Rumeileh S, Capellari S, Parchi P.	2018	Rapidly Progressive Alzheimer's Disease: Contributions to Clinical-Pathological Definition and Diagnosis	n	n	n	n	n	n	n	y	n		10.1007/s11845-020-02274-8
acharibasam2018	Acharibasam, Jeremiah Wezanamo; Anuga, Samuel Weniga	2018	Psychological distance of climate change and mental health risks assessment of smallholder farmers in Northern Ghana: Is habituation a threat to climate change?	n	n	n	n	n	n	n	y	n		10.1037/ccp0000189
acton2016	Acton, Jane; Carter, Bernie	2016	The Impact of Immersive Outdoor Activities in Local Woodlands on Young Carers Emotional Literacy and Well-Being	n	n	n	n	n	n	n	y	n		10.1007/s11524-019-00384-y
adamis2011	Adamis, D.; Papanikolaou, V.; Mellon, R. C.; Prodromitis, G.	2011	THE IMPACT OF WILDFIRES ON MENTAL HEALTH OF RESIDENTS IN A RURAL AREA OF GREECE. A CASE CONTROL POPULATION BASED STUDY	n	n	n	n	n	n	n	y	n		10.1080/17482631.2017.1324700
adams2020	Adams EA, Stoler J, Adams Y.	2020	Water insecurity and urban poverty in the Global South: Implications for health and human biology	n	n	n	n	n	n	n	y	n		10.18865/ed.28.S1.241
adayonfo2017	Adayonfo, Eo; Selo-Ojeme, Co	2017	Depressed patients seen at the University of Benin Teaching Hospital (UBTH): a six-year review	n	n	n	n	n	n	n	y	n		10.1111/jpm.12673
aebi2020	Aebi NJ, Bringolf-Isler B, Schaffner E, Caviezel S, Imboden M, Probst-Hensch N.	2020	Patterns of cross-sectional and predictive physical activity in Swiss adults aged 52+: results from the SAPALDIA cohort	n	n	n	n	n	n	n	y	n		10.1080/22423982.2019.1565861
aerts2018	Aerts R, Honnay O, Van Nieuwenhuyse A.	2018	Biodiversity and human health: mechanisms and evidence of the positive health effects of diversity in nature and green spaces	n	n	n	n	n	n	n	y	n		10.3389/fpsyt.2019.00789
aerts2020	Aerts R, Stas M, Vanlessen N, Hendrickx M, Bruffaerts N, Hoebeke L, Dendoncker N, Dujardin S, Saenen ND, Van Nieuwenhuyse A, Aerts JM, Van Orshoven J, Nawrot TS, Somers B.	2020	Residential green space and seasonal distress in a cohort of tree pollen allergy patients	n	n	n	n	n	n	n	y	n		10.1177/1363461517703023
afifi2012	Afifi WA, Felix ED, Afifi TD.	2012	The impact of uncertainty and communal coping on mental health following natural disasters	n	n	n	n	n	n	n	y	n		10.1016/j.healthplace.2015.06.002
afzali2019	Afzali MH, Sunderland M, Stewart S, Masse B, Seguin J, Newton N, Teesson M, Conrod P.	2019	Machine-learning prediction of adolescent alcohol use: a cross-study, cross-cultural validation	n	n	n	n	n	n	n	y	n		10.1177/1049732319827523
agyapong2018	Agyapong VIO, Hrabok M, Juhas M, Omeje J, Denga E, Nwaka B, Akinjise I, Corbett SE, Moosavi S, Brown M, Chue P, Greenshaw AJ, Li XM.	2018	Prevalence Rates and Predictors of Generalized Anxiety Disorder Symptoms in Residents of Fort McMurray Six Months After a Wildfire	n	n	n	n	n	n	n	y	n		10.1186/s12905-017-0369-z
agyapong2020	Agyapong VIO, Ritchie A, Brown MRG, Noble S, Mankowsi M, Denga E, Nwaka B, Akinjise I, Corbett SE, Moosavi S, Chue P, Li XM, Silverstone PH, Greenshaw AJ.	2020	Long-Term Mental Health Effects of a Devastating Wildfire Are Amplified by Socio-Demographic and Clinical Antecedents in Elementary and High School Staff	n	n	n	n	n	n	n	y	n		10.1371/journal.pone.0074708
aiena2016	Aiena BJ, Buchanan EM, Smith CV, Schulenberg SE.	2016	Meaning, Resilience, and Traumatic Stress After the Deepwater Horizon Oil Spill: A Study of Mississippi Coastal Residents Seeking Mental Health Services	n	n	n	n	n	n	n	y	n		10.1111/maq.12288
ailshire2014	Ailshire JA, Crimmins EM.	2014	Fine particulate matter air pollution and cognitive function among older US adults	n	n	n	n	n	n	n	y	n		10.1017/S0714980819000576
ailshire2015	Ailshire JA, Clarke P.	2015	Fine particulate matter air pollution and cognitive function among U.S. older adults	n	n	n	n	n	n	n	y	n		10.3109/01612840903254842
akerkar2017	Akerkar, Supriya; Fordham, Maureen	2017	Gender, place and mental health recovery in disasters: Addressing issues of equality and difference	n	n	n	n	n	n	n	y	n		10.1016/j.healthplace.2017.07.006
akhter2015	Akhter, Syeda Rezwana; Sarkar, Ratan Kumar; Dutta, Mitul; Khanom, Roxana; Akter, Nasima; Chowdhury, Md Raihan; Sultan, Mainus	2015	Issues with families and children in a disaster context: A qualitative perspective from rural Bangladesh	n	n	n	n	n	n	n	y	n		10.1080/15564886.2018.1503983
akter2019	Akter S.	2019	Impact of drinking water salinity on children's education: Empirical evidence from coastal Bangladesh	n	n	n	n	n	n	n	y	n		10.6224/JN.201906_66(3).03
al2011	Al-Mutairi NZ, Al-Attar MA, Al-Rukaibi FS.	2011	Traffic-generated noise pollution: exposure of road users and populations in Metropolitan Kuwait	n	n	n	n	n	n	n	y	n		10.1590/s1808-86942011000100005
alaazi2015	Alaazi DA, Masuda JR, Evans J, Distasio J.	2015	Therapeutic landscapes of home: Exploring Indigenous peoples' experiences of a Housing First intervention in Winnipeg	n	n	n	n	n	n	n	y	n		10.1007/s00115-019-00802-1
alcock2015	Alcock, I.; White, M. P.; Lovell, R.; Higgins, S. L.; Osborne, N. J.; Husk, K.; Wheeler, B. W.	2015	What accounts for 'England's green and pleasant land'? A panel data analysis of mental health and land cover types in rural England	n	n	n	n	n	n	n	y	n		10.1007/s00115-019-0769-4
alderman2013	Alderman K, Turner LR, Tong S.	2013	Assessment of the health impacts of the 2011 summer floods in Brisbane	n	n	n	n	n	n	n	y	n		10.1590/S0120-41572015000500006
alexopoulos2014	Alexopoulos GS, Arean P.	2014	A model for streamlining psychotherapy in the RDoC era: the example of 'Engage'	n	n	n	n	n	n	n	y	n		10.1055/a-0920-6423
alimohammadi2018	Alimohammadi I, Ahmadi Kanrash F, Abolghasemi J, Afrazandeh H, Rahmani K.	2018	Effect of Chronic Noise Exposure on Aggressive Behavior of Automotive Industry Workers	n	n	n	n	n	n	n	y	n		10.1055/s-0030-1270507
almendra2019	Almendra R, Loureiro A, Silva G, Vasconcelos J, Santana P.	2019	Short-term impacts of air temperature on hospitalizations for mental disorders in Lisbon	n	n	n	n	n	n	n	y	n		10.1007/s00103-017-2548-3
aln2020	Aln?¬s D, Kaufmann T, Marquand AF, Smith SM, Westlye LT.	2020	Patterns of sociocognitive stratification and perinatal risk in the child brain	n	n	n	n	n	n	n	y	n		10.1701/1417.15695
aloufi2019	Aloufi, Khalid Kulaib; Alaslani, Tariq Hussein; Alhumaidi, Rakan Awadh; Bin Yousef, Khaled Hamdi; Alamri, Abdullah Salman Mohammed; AlHarthi, Saaed Saoud; Aleisa, Mohanad Mohammad S.; Zrari, Mohammed Ahmed; Shibah, Amal Mousa Ahmad; Alzahrani, Ibraheem Saeed Saadan; Almomaten, Jafar Yassen; Alghamdi, Badr Saad Dhawi; Azhar, Leena Esam	2019	SCHIZOPHRENIA PRESENTATION AND MANAGEMENT	n	n	n	n	n	n	n	y	n		x
altu2020	Altu?â H, Fuks KB, H??ls A, Mayer AK, Tham R, Krutmann J, Schikowski T.	2020	Air pollution is associated with depressive symptoms in elderly women with cognitive impairment	n	n	n	n	n	n	n	y	n		10.22365/jpsych.2018.292.118
alvarez2017a	Alvarez-Pedrerol M, Rivas I, L??pez-Vicente M, Suades-Gonz?Ýlez E, Donaire-Gonzalez D, Cirach M, de Castro M, Esnaola M, Basaga??a X, Dadvand P, Nieuwenhuijsen M, Sunyer J.	2017	Impact of commuting exposure to traffic-related air pollution on cognitive development in children walking to school	n	n	n	n	n	n	n	y	n		10.22365/jpsych.2017.284.301
amano2018	Amano T, Butt I, Peh KS.	2018	The importance of green spaces to public health: a multi-continental analysis	n	n	n	n	n	n	n	y	n		10.1051/medsci/20173301019
amin2020	Amin, Rizwana; Nadeem, Erum; Iqbal, Khizra; Asadullah, Muhammad Ali; Hussain, Bashir	2020	Support for Students Exposed to Trauma (SSET) Program: An Approach for Building Resilience and Social Support Among Flood-Impacted Children	n	n	n	n	n	n	n	y	n		10.1590/s1726-46342010000400004
ammerman2018	Ammerman BA, Jacobucci R, McCloskey MS.	2018	Using Exploratory Data Mining to Identify Important Correlates of Nonsuicidal Self-Injury Frequency	n	n	n	n	n	n	n	y	n		x
amorosi2018	Amorosi M.	2018	Ecosustainibility and Mental Health: female aspects	n	n	n	n	n	n	n	y	n		x
an2020	An, Jing; Wang, Siwei; Cheng, Mingwang; Li, Tan; Sheng, Liying; Bian, Shu; Ni, Xianlin; Yao, Jun; Fu, Changluan; An, Jinlong	2020	Mental health of urban residents in the developed cities of the Yangtze River Delta in China: Measurement with the mental composite scale from the WHOQOL-BREF	n	n	n	n	n	n	n	y	n		x
anderson2011	Anderson P, Jan?«-Llopis E.	2011	Mental health and global well-being	n	n	n	n	n	n	n	y	n		x
anderson2013	Anderson, G. Brooke; Bell, Michelle L.; Peng, Roger D.	2013	Methods to Calculate the Heat Index as an Exposure Metric in Environmental Health Research	n	n	n	n	n	n	n	y	n		10.1007/s00103-019-02937-7
andreucci2019	Andreucci, Maria Beatrice; Russo, Alessio; Olszewska-Guizzo, Agnieszka	2019	Designing Urban Green Blue Infrastructure for Mental Health and Elderly Wellbeing	n	n	n	n	n	n	n	y	n		10.1055/a-1201-2155
andrews2020	Andrews, Evan J.; Harper, Sarah; Cashion, Tim; Palacios-Abrantes, Juliano; Blythe, Jessica; Daly, Jack; Eger, Sondra; Hoover, Carie; Talloni-Alvarez, Nicolas; Teh, Louise; Bennett, Nathan; Epstein, Graham; Knott, Christine; Newell, Sarah L.; Whitney, Charlotte K.	2020	Supporting early career researchers: insights from interdisciplinary marine scientists	n	n	n	n	n	n	n	y	n		10.33588/rn.7102.2019508
annerstedt2012	Annerstedt M, Ostergren PO, Bj?┬rk J, Grahn P, Sk?±rb?±ck E, W?±hrborg P.	2012	Green qualities in the neighbourhood and mental health - results from a longitudinal cohort study in Southern Sweden	n	n	n	n	n	n	n	y	n		10.1055/a-0591-3962
anon2013	anon	2013	Behavioral Health, United States, 2012	n	n	n	n	n	n	n	y	n		10.1007/s00103-018-2874-0
anon2015	anon	2015	Guiding development of pilot projects to drive quality improvement	n	n	n	n	n	n	n	y	n		10.3760/cma.j.issn.0253-9624.2020.02.006
anon2018	anon	2018	Focus on climate change and mental health	n	n	n	n	n	n	n	y	n		10.1007/s00115-010-3167-5
anon2018a	anon	2018	Pollution linked to cognitive decline	n	n	n	n	n	n	n	y	n		x
anon2019	anon	2019	Summary of the General Discussion on "Early Life Exposure to Air Pollution, Cognitive Development, and Labor Market Outcome"	n	n	n	n	n	n	n	y	n		10.1016/j.arcped.2017.03.011
ardalan2019	Ardalan A, Belay GD, Assen M, Hosseinzadeh-Attar MJ, Khoei EM, Ostadtaghizadeh A.	2019	Impact of climate change on community health and resilience in Ethiopia: A review article	n	n	n	n	n	n	n	y	n		10.4045/tidsskr.15.0782
aschengrau2016	Aschengrau A, Janulewicz PA, White RF, Vieira VM, Gallagher LG, Getz KD, Webster TF, Ozonoff DM.	2016	Long-term Neurotoxic Effects of Early-life Exposure to?ßTetrachloroethylene-contaminated Drinking Water	n	n	n	n	n	n	n	y	n		x
asim2019	Asim M, Mekkodathil A, Sathian B, Elayedath R, N RK, Simkhada P, van Teijlingen E.	2019	Post-Traumatic Stress Disorder among the Flood Affected Population in Indian Subcontinent	n	n	n	n	n	n	n	y	n		10.1016/j.gaceta.2020.05.007
asmus2020	Asmus CIRF, Barbosa AP, Meyer A, Damasceno N, Rosa ACS, Medronho R, da Cunha AJLA, Moreira JC, Fernandes TVRB, Martins M, Luiz RR, de Magalh?·es C?¾mara V.	2020	Rio Birth Cohort Study on Environmental Exposure and Childhood Development - PIPA Project	n	n	n	n	n	n	n	y	n		10.3917/spub.190.0163
asnakew2019	Asnakew S, Shumet S, Ginbare W, Legas G, Haile K.	2019	Prevalence of post-traumatic stress disorder and associated factors among Koshe landslide survivors, Addis Ababa, Ethiopia: a community-based, cross-sectional study	n	n	n	n	n	n	n	y	n		x
astell2019	Astell-Burt T, Feng X.	2019	Association of Urban Green Space With Mental Health and General Health Among Adults in Australia	n	n	n	n	n	n	n	y	n		x
astete2010	Astete J, Gasta??aga Mdel C, Fiestas V, Oblitas T, Sabastizagal I, Lucero M, Abad?íe Jdel M, Mu??oz ME, Valverde A, Suarez M.	2010	[Comunicable diseases, mental health and exposure to environmental pollutants in population living near Las Bambas mining project before exploitation phase, Peru 2006]	n	n	n	n	n	n	n	y	n		10.1016/j.encep.2019.07.009
aston2014	Aston, Hermione Jane	2014	An ecological model of mental health promotion for school communities: adolescent views about mental health promotion in secondary schools in the UK	n	n	n	n	n	n	n	y	n		10.1007/s00101-020-00783-w
asugeni2015	Asugeni J, MacLaren D, Massey PD, Speare R.	2015	Mental health issues from rising sea level in a remote coastal region of the Solomon Islands: current and future	n	n	n	n	n	n	n	y	n		x
attademo2020	Attademo L, Bernardini F.	2020	Air Pollution as Risk Factor for Mental Disorders: In Search for a Possible Link with Alzheimer's Disease and Schizophrenia	n	n	n	n	n	n	n	y	n		x
austin2017	Austin MP, Christl B, McMahon C, Kildea S, Reilly N, Yin C, Simcock G, Elgbeili G, Laplante DP, King S.	2017	Moderating effects of maternal emotional availability on language and cognitive development in toddlers of mothers exposed to a natural disaster in pregnancy: The QF2011 Queensland Flood Study	n	n	n	n	n	n	n	y	n		x
austin2018	Austin, Emma K.; Handley, Tonelle; Kiem, Anthony S.; Rich, Jane L.; Lewin, Terry J.; Askland, Hedda H.; Askarimarnani, Sara S.; Perkins, David A.; Kelly, Brian J.	2018	Drought-related stress among farmers: findings from the Australian Rural Mental Health Study	n	n	n	n	n	n	n	y	n		x
austin2018a	Austin AM, Bynum JPW, Maust DT, Gottlieb DJ, Meara E.	2018	Long-Term Implications Of A Short-Term Policy: Redacting Substance Abuse Data	n	n	n	n	n	n	n	y	n		x
ayeb2020	Ayeb-Karlsson, Sonja	2020	'When we were children we had dreams, then we came to Dhaka to survive': urban stories connecting loss of wellbeing, displacement and (im)mobility	n	n	n	n	n	n	n	y	n		10.22365/jpsych.2018.292.130
ayeb2020a	Ayeb-Karlsson, Sonja; Kniveton, Dominic; Cannon, Terry	2020	Trapped in the prison of the mind: Notions of climate-induced (im)mobility decision-making and wellbeing from an urban informal settlement in Bangladesh	n	n	n	n	n	n	n	y	n		10.6224/JN.63.6.107
ayer2019	Ayer L, Engel C, Parker A, Seelam R, Ramchand R.	2019	Behavioral Health of Gulf Coast Residents 6 Years After the Deepwater Horizon Oil Spill: The Role of Trauma History	n	n	n	n	n	n	n	y	n		x
azzazy2020	Azzazy, Sameh; Ghaffarianhoseini, Amirhosein; GhaffarianHoseini, Ali; Naismith, Nicola; Doborjeh, Zohreh	2020	A critical review on the impact of built environment on users' measured brain activity	n	n	n	n	n	n	n	y	n		10.1016/j.respe.2013.05.010
b2019	B?┬ge I, Schepker R, Fegert JM.	2019	[Intensive psychiatric care of children and adolescents in their natural environment : Alternatives to inpatient treatment]	n	n	n	n	n	n	n	y	n		10.1007/s00103-016-2336-5
backovi2010	Backovi?þ D.	2010	[Mental hygiene: ideas and practice in Serbia]	n	n	n	n	n	n	n	y	n		x
baer2015	Baer, Ruth A.	2015	Assessing Mindfulness in Multiple Contexts: a Comment on Christopher, Woodrich, and Tiernan (2014)	n	n	n	n	n	n	n	y	n		10.1007/s00115-017-0314-2
bai2020	Bai, Li; Chen, Wanyue; He, Zijian; Sun, Siyue; Qin, Jia	2020	Pollution characteristics, sources and health risk assessment of polycyclic aromatic hydrocarbons in PM2.5 in an office building in northern areas, China	n	n	n	n	n	n	n	y	n		x
bains2019	Bains KK, Turnbull T.	2019	Improving Health Outcomes and Serving Wider Society: The Potential Role of Understanding and Cultivating Prosocial Purpose Within Health Psychology Research and Practice to Address Climate Change and Social Isolation and Loneliness	n	n	n	n	n	n	n	y	n		x
baker2018	Baker, Patricia	2018	Identifying the connection between Roman conceptions of 'Pure Air' and physical and mental health in Pompeian gardens (c.150 BC-AD 79): a multi-sensory approach to ancient medicine	n	n	n	n	n	n	n	y	n	historic	x
baklien2016	Baklien B, Ytterhus B, Bongaardt R.	2016	When everyday life becomes a storm on the horizon: families' experiences of good mental health while hiking in nature	n	n	n	n	n	n	n	y	n		x
ballb2013	Ballb?┐ M, Sureda X, Mart?ínez-S?Ýnchez JM, Salt?? E, Gual A, Fern?Ýndez E.	2013	Second-hand smoke in mental healthcare settings: time to implement total smoke-free bans?	n	n	n	n	n	n	n	y	n		10.7202/1008592ar
ballb2015	Ballb?┐ M, Mart?ínez-S?Ýnchez JM, Gual A, Mart?ínez C, Fu M, Sureda X, Padr??n-Monedero A, Gal?Ýn I, Fern?Ýndez E.	2015	Association of second-hand smoke exposure at home with psychological distress in the Spanish adult population	n	n	n	n	n	n	n	y	n		10.1007/s00115-019-00795-x
balseviciene2013	Balseviciene, Birute; Sinkariova, Liuda; Andrusaityte, Sandra	2013	Do Green Spaces Matter? The Associations Between Parenting Stress, Child Mental Health Problems And Green Spaces	n	n	n	n	n	n	n	y	n		10.1016/j.encep.2016.10.001
bandla2019	Bandla S, Nappinnai NR, Gopalasamy S.	2019	Psychiatric morbidity in December 2015 flood-affected population in Tamil Nadu, India	n	n	n	n	n	n	n	y	n		10.1016/j.injury.2012.08.060
bandyopadhyay2016	Bandyopadhyay, Amitava	2016	Neurological Disorders from Ambient (Urban) Air Pollution Emphasizing UFPM and PM2.5	n	n	n	n	n	n	n	y	n		10.7326/M13-3011
bangpan2019	Bangpan M, Felix L, Dickson K.	2019	Mental health and psychosocial support programmes for adults in humanitarian emergencies: a systematic review and meta-analysis in low and middle-income countries	n	n	n	n	n	n	n	y	n		10.1016/j.envres.2018.01.016
banjari2018	Banjari I, Mar?ýek T, Tomi?þ S, Waisundara VY.	2018	Forestalling the Epidemics of Parkinson's Disease Through Plant-Based Remedies	n	n	n	n	n	n	n	y	n		10.1080/13504509.2020.1765042
barger2020	Barger, Brian; Larson, Lincoln R.; Ogletree, Scott; Torquati, Julia; Rosenberg, Steven; Gaither, Cassandra Johnson; Bartz, Jody Marie; Gardner, Andrew; Moody, Eric	2020	Tree Canopy Coverage Predicts Lower Conduct Problem Severity in Children with ASD	n	n	n	n	n	n	n	y	n		10.1016/j.sleh.2019.01.003
barker2017	Barker, Gillian	2017	From stability to norm transformation: lessons about resilience, for development, from ecology	n	n	n	n	n	n	n	y	n		10.1186/s12961-019-0418-1
barnes2019	Barnes MR, Donahue ML, Keeler BL, Shorb CM, Mohtadi TZ, Shelby LJ.	2019	Characterizing Nature and Participant Experience in Studies of Nature Exposure for Positive Mental Health: An Integrative Review	n	n	n	n	n	n	n	y	n		10.1038/s41598-018-37149-7
barreau2017	Barreau T, Conway D, Haught K, Jackson R, Kreutzer R, Lockman A, Minnick S, Roisman R, Rozell D, Smorodinsky S, Tafoya D, Wilken JA.	2017	Physical, Mental, and Financial Impacts From Drought in Two California Counties, 2015	n	n	n	n	n	n	n	y	n		10.1186/1747-5341-7-2
barrett2016	Barrett B, Grabow M, Middlecamp C, Mooney M, Checovich MM, Converse AK, Gillespie B, Yates J.	2016	Mindful Climate Action: Health and Environmental Co-Benefits from Mindfulness-Based Behavioral Training	n	n	n	n	n	n	n	y	n		10.1177/1420326X19889653
barrig2017	Barrig??n ML, Berrouiguet S, Carballo JJ, Bonal-Gim?«nez C, Fern?Ýndez-Navarro P, Pfang B, Delgado-G??mez D, Courtet P, Aroca F, Lopez-Castroman J, Art?«s-Rodr?íguez A, Baca-Garc?ía E; MEmind study group.	2017	User profiles of an electronic mental health tool for ecological momentary assessment: MEmind	n	n	n	n	n	n	n	y	n		10.1016/j.anai.2020.05.025
barry2016	Barry CL, Goldman HH, Huskamp HA.	2016	Federal Parity In The Evolving Mental Health And Addiction Care Landscape	n	n	n	n	n	n	n	y	n		10.15171/ijhpm.2017.01
basaga2016	Basaga??a X, Esnaola M, Rivas I, Amato F, Alvarez-Pedrerol M, Forns J, L??pez-Vicente M, Pujol J, Nieuwenhuijsen M, Querol X, Sunyer J.	2016	Neurodevelopmental Deceleration by Urban Fine Particles from Different Emission Sources: A Longitudinal Observational Study	n	n	n	n	n	n	n	y	n		10.1088/1742-6596/976/1/012011
bauer2012	Bauer R, Koepke F, Sterzinger L, Spiessl H.	2012	Burden, rewards, and coping--the ups and downs of caregivers of people with mental illness	n	n	n	n	n	n	n	y	n		10.1016/j.eswa.2013.01.023
beck2014	Beck SR, Cutting N, Apperly IA, Demery Z, Iliffe L, Rishi S, Chappell J.	2014	Is tool-making knowledge robust over time and across problems?	n	n	n	n	n	n	n	y	n		10.18666/TRJ-2017-V51-I4-7374
becker2010	Becker, Stephen P.	2010	Wilderness Therapy: Ethical Considerations for Mental Health Professionals	n	n	n	n	n	n	n	y	n		x
becker2013	Becker, Anne E.; Kleinman, Arthur	2013	GLOBAL HEALTH Mental Health and the Global Agenda	n	n	n	n	n	n	n	y	n		10.1007/s10900-018-0542-9
becker2019a	Becker TD, Ho-Foster AR, Poku OB, Marobela S, Mehta H, Cao DTX, Yang LS, Blank LI, Dipatane VI, Moeng LR, Molebatsi K, Eisenberg MM, Barg FK, Blank MB, Opondo PR, Yang LH.	2019	"It's When the Trees Blossom": Explanatory Beliefs, Stigma, and Mental Illness in the Context of HIV in Botswana	n	n	n	n	n	n	n	y	n		10.1007/s10548-018-0651-x
beecher2016	Beecher ME, Eggett D, Erekson D, Rees LB, Bingham J, Klundt J, Bailey RJ, Ripplinger C, Kirchhoefer J, Gibson R, Griner D, Cox JC, Boardman RD.	2016	Sunshine on my shoulders: Weather, pollution, and emotional distress	n	n	n	n	n	n	n	y	n		10.1186/s12199-019-0800-1
beemer2019	Beemer, Cody J.; Stearns-Yoder, Kelly A.; Schuldt, Steven J.; Kinney, Kerry A.; Lowry, Christopher A.; Postolache, Teodor T.; Brenner, Lisa A.; Hoisington, Andrew J.	2019	A brief review on the mental health for select elements of the built environment	n	n	n	n	n	n	n	y	n		10.1177/0962280213502437
bei2013	Bei B, Bryant C, Gilson KM, Koh J, Gibson P, Komiti A, Jackson H, Judd F.	2013	A prospective study of the impact of floods on the mental and physical health of older adults	n	n	n	n	n	n	n	y	n		10.1002/cbm.1853
beidas2014	Beidas RS, Manderscheid RW.	2014	A Healthy New World: Emergent Opportunities for Clinical Psychologists in the Patient Protection and Affordable Care Act	n	n	n	n	n	n	n	y	n		10.3389/fvets.2017.00163
belleville2019	Belleville G, Ouellet MC, Morin CM.	2019	Post-Traumatic Stress among Evacuees from the 2016 Fort McMurray Wildfires: Exploration of Psychological and Sleep Symptoms Three Months after the Evacuation	n	n	n	n	n	n	n	y	n		10.1016/j.ijlp.2017.06.009
belojevi2016	Belojevi?þ G, Paunovi?þ K.	2016	Recent advances in research on non-auditory effects of community noise	n	n	n	n	n	n	n	y	n		10.1111/ene.13232
ben2016	Ben-Zeev D.	2016	Mobile Health for All: Public-Private Partnerships Can Create a New Mental Health Landscape	n	n	n	n	n	n	n	y	n		10.1051/matecconf/20178701007
bennett2010	Bennett CM, McMichael AJ.	2010	Non-heat related impacts of climate change on working populations	n	n	n	n	n	n	n	y	n		10.1186/s13012-017-0673-x
bennett2013	Bennett, John L.; Douglass, Katie E.	2013	Growing Pains: An Eriksonian View of the Arc of Presenting Concerns in an LGBT Community Mental Health Center	n	n	n	n	n	n	n	y	n		10.1037/a0033044
berg2016a	van den Berg M, van Poppel M, van Kamp I, Andrusaityte S, Balseviciene B, Cirach M, Danileviciute A, Ellis N, Hurst G, Masterson D, Smith G, Triguero-Mas M, Uzdanaviciute I, de Wit P, van Mechelen W, Gidlow C, Grazuleviciene R, Nieuwenhuijsen MJ, Kruize H, Maas J.	2016	Visiting green space is associated with mental health and vitality: A cross-sectional study in four european cities	n	n	n	n	n	n	n	y	n		10.1080/00038628.2020.1749980
berk2014	Berk M, Williams LJ, Andreazza AC, Pasco JA, Dodd S, Jacka FN, Moylan S, Reiner EJ, Magalhaes PV.	2014	Pop, heavy metal and the blues: secondary analysis of persistent organic pollutants (POP), heavy metals and depressive symptoms in the NHANES National Epidemiological Survey	n	n	n	n	n	n	n	y	n		10.7416/ai.2019.2285
berle2015	Berle D, Steel Z.	2015	Families of returned defence force personnel: a changing landscape of challenges	n	n	n	n	n	n	n	y	n		10.1098/rsos.192240
berman2014	Berman MI, Hegel MT.	2014	Predicting depression outcome in mental health treatment: a recursive partitioning analysis	n	n	n	n	n	n	n	y	n		10.1016/j.jad.2019.05.041
bernardini2019	Bernardini F, Attademo L, Trezzi R, Gobbicchi C, Balducci PM, Del Bello V, Menculini G, Pauselli L, Piselli M, Sciarma T, Moretti P, Tamantini A, Quartesan R, Compton MT, Tortorella A.	2019	Air pollutants and daily number of admissions to psychiatric emergency services: evidence for detrimental mental health effects of ozone	n	n	n	n	n	n	n	y	n		10.3390/ijerph16020280
berry2010	Berry HL, Bowen K, Kjellstrom T.	2010	Climate change and mental health: a causal pathways framework	n	n	n	n	n	n	n	y	n		10.1007/s10943-018-0737-5
berry2010a	Berry HL, Butler JR, Burgess CP, King UG, Tsey K, Cadet-James YL, Rigby CW, Raphael B.	2010	Mind, body, spirit: co-benefits for mental health from climate change adaptation and caring for country in remote Aboriginal Australian communities	n	n	n	n	n	n	n	y	n		10.1371/journal.pone.0212179
berry2011	Berry HL, Hogan A, Owen J, Rickwood D, Fragar L.	2011	Climate change and farmers' mental health: risks and responses	n	n	n	n	n	n	n	y	n		x
berry2015	Berry HL, Peel D.	2015	Worrying about climate change: is it responsible to promote public debate?	n	n	n	n	n	n	n	y	n		10.1016/j.marpol.2015.06.013
besch2020	Besch V, Debban?« M, Greiner C, Magnin C, De N?«ris M, Ambrosetti J, Perroud N, Poulet E, Prada P.	2020	Emergency psychiatric management of borderline personality disorder: Towards an articulation of modalities for personalised integrative care	n	n	n	n	n	n	n	y	n		10.1136/medhum-2018-011561
bettmann2017	Bettmann, Joanna E.; Tucker, Anita; Behrens, Ellen; Vanderloo, Mindy	2017	Changes in Late Adolescents and Young Adults' Attachment, Separation, and Mental Health During Wilderness Therapy	n	n	n	n	n	n	n	y	n		x
beutel2016	Beutel ME, J??nger C, Klein EM, Wild P, Lackner K, Blettner M, Binder H, Michal M, Wiltink J, Br?±hler E, M??nzel T.	2016	Noise Annoyance Is Associated with Depression and Anxiety in the General Population- The Contribution of Aircraft Noise	n	n	n	n	n	n	n	y	n		10.1097/PAF.0000000000000068
beutel2020	Beutel ME, Br?±hler E, Ernst M, Klein E, Reiner I, Wiltink J, Michal M, Wild PS, Schulz A, M??nzel T, Hahad O, K?┬nig J, Lackner KJ, Pfeiffer N, Tibubos AN.	2020	Noise annoyance predicts symptoms of depression, anxiety and sleep disturbance 5 years later. Findings from the Gutenberg Health Study	n	n	n	n	n	n	n	y	n		10.1016/j.chiabu.2019.01.015
bevilacqua2020	Bevilacqua K, Rasul R, Schneider S, Guzman M, Nepal V, Banerjee D, Schulte J, Schwartz RM.	2020	Understanding Associations Between Hurricane Harvey Exposure and Mental Health Symptoms Among Greater Houston-Area Residents	n	n	n	n	n	n	n	y	n		10.3109/09540261.2015.1091292
bezold2018	Bezold CP, Banay RF, Coull BA, Hart JE, James P, Kubzansky LD, Missmer SA, Laden F.	2018	The Association Between Natural Environments and Depressive Symptoms in Adolescents Living in the United States	n	n	n	n	n	n	n	y	n		10.5888/pcd16.190138
bhagwat2017	Bhagwat S, Bruxner G.	2017	'Not quite out of the woods': potential for misdiagnosis of delayed neurologic syndrome of carbon monoxide poisoning as relapse of mental illness	n	n	n	n	n	n	n	y	n		10.1007/s11042-019-7327-8
bhamani2012	Bhamani A, Sobani ZA, Baqir M, Bham NS, Beg MA, Fistein E.	2012	Mental health in the wake of flooding in pakistan: an ongoing humanitarian crisis	n	n	n	n	n	n	n	y	n		10.1111/cpsp.12067
bhat2018	Bhat U S, Amaresha AC, Kodancha P, John S, Kumar S, Aiman A, Jain PA, Cherian AV.	2018	Psychological distress among college students of coastal district of Karnataka: A community-based cross-sectional survey	n	n	n	n	n	n	n	y	n		10.1210/jc.2009-2404
bhat2019	Bhat, Bilal Ahmad	2019	Socio-demographic Profile and Psychiatric Morbidity of Flood Victims in a Mental Health Camp	n	n	n	n	n	n	n	y	n		10.3390/rs11121395
bhatia2012	Bhatia R.	2012	Policy and regulatory action can reduce harms from particulate pollution: comment on "exposure to particulate air pollution and cognitive decline in older women"	n	n	n	n	n	n	n	y	n		10.1057/9781137448880
bielinis2019	Bielinis E, Jaroszewska A, ?³ukowski A, Takayama N.	2019	The Effects of a Forest Therapy Programme on Mental Hospital Patients with Affective and Psychotic Disorders	n	n	n	n	n	n	n	y	n		10.1016/j.cmpb.2018.08.016
birch2020	Birch J, Rishbeth C, Payne SR.	2020	Nature doesn't judge you - how urban nature supports young people's mental health and wellbeing in a diverse UK city	n	n	n	n	n	n	n	y	n		10.1016/j.evalprogplan.2019.101678
birgitta2018	Birgitta Gunnarsson A, Wagman P, Hedin K, H?Ðkansson C.	2018	Treatment of depression and/or anxiety - outcomes of a randomised controlled trial of the tree theme method?½ versus regular occupational therapy	n	n	n	n	n	n	n	y	n		10.1007/s10608-015-9730-4
birken2019	Birken, Mary; Bryant, Wendy	2019	A Photovoice study of user experiences of an occupational therapy department within an acute inpatient mental health setting	n	n	n	n	n	n	n	y	n		x
bistricky2019	Bistricky SL, Long LJ, Lai BS, Gallagher MW, Kanenberg H, Elkins SR, Harper KL, Short MB.	2019	Surviving the storm: Avoidant coping, helping behavior, resilience and affective symptoms around a major hurricane-flood	n	n	n	n	n	n	n	y	n		10.1371/journal.pone.0065371
bitta2019	Bitta MA, Kariuki SM, Gona J, Abubakar A, Newton CRJC.	2019	Priority mental, neurological and substance use disorders in rural Kenya: Traditional health practitioners' and primary health care workers' perspectives	n	n	n	n	n	n	n	y	n		10.1016/j.healthplace.2019.102212
bjorling2020	Bjorling, Elin A.; Thomas, Kyle; Rose, Emma J.; Cakmak, Maya	2020	Exploring Teens as Robot Operators, Users and Witnesses in the Wild	n	n	n	n	n	n	n	y	n		10.1007/978-3-030-16946-6_57
blank2012	Blank, Karen; Hash, Michael; Feder, Judith	2012	FEDERAL HEALTH POLICY: MENTAL HEALTH PRIORITIES IN A CHALLENGING CONGRESSIONAL LANDSCAPE	n	n	n	n	n	n	n	y	n		10.1017/S003329171800315X
blashki2011	Blashki G, Armstrong G, Berry HL, Weaver HJ, Hanna EG, Bi P, Harley D, Spickett JT.	2011	Preparing health services for climate change in Australia	n	n	n	n	n	n	n	y	n		10.1007/s10826-016-0439-0
block2018	Block EP, Zimmerman FJ, Aguilar E, Stanley L, Halfon N.	2018	Early Child Development, Residential Crowding, and Commute Time in 8 US States, 2010-2017	n	n	n	n	n	n	n	y	n		10.1080/10615806.2019.1695523
block2019	Block K, Molyneaux R, Gibbs L, Alkemade N, Baker E, MacDougall C, Ireton G, Forbes D.	2019	The role of the natural environment in disaster recovery: "We live here because we love the bush"	n	n	n	n	n	n	n	y	n		10.3122/jabfm.2018.02.170219
boda2019	Boda E, Rigamonti AE, Bollati V.	2019	Understanding the effects of air pollution on neurogenesis and gliogenesis in the growing and adult brain	n	n	n	n	n	n	n	y	n		10.1038/mp.2013.150
boillot2019	Boillot A, Ringuenet D, Kapila Y, Pallier A, Colon P, Bouchard P, Rang?« H.	2019	High serum ferritin levels are associated with a reduced periodontium in women with anorexia nervosa	n	n	n	n	n	n	n	y	n		10.1177/0706743719839318
bolten2019	Bolten, Margarete I.	2019	Ghosts in the Nursery 2.0	n	n	n	n	n	n	n	y	n		10.1097/ACM.0b013e31825cfa35
bond2010	Bond T.	2010	Comparing decalage and development with cognitive developmental tests	n	n	n	n	n	n	n	y	n		10.3390/ijerph15071479
bonsall2015	Bonsall MB, Geddes JR, Goodwin GM, Holmes EA.	2015	Bipolar disorder dynamics: affective instabilities, relaxation oscillations and noise	n	n	n	n	n	n	n	y	n		10.1007/s10488-015-0705-2
bortolotti2015	Bortolotti L, Antrobus M.	2015	Costs and benefits of realism and optimism	n	n	n	n	n	n	n	y	n		10.1007/s10566-015-9331-0
borzekowski2019	Borzekowski DLG.	2019	Constancy (the New Media "C") and Future Generations	n	n	n	n	n	n	n	y	n		10.1007/s11069-017-2793-7
bos2013	Bos I, De Boever P, Vanparijs J, Pattyn N, Panis LI, Meeusen R.	2013	Subclinical effects of aerobic training in urban environment	n	n	n	n	n	n	n	y	n		x
bos2014	Bos I, De Boever P, Int Panis L, Meeusen R.	2014	Physical activity, air pollution and the brain	n	n	n	n	n	n	n	y	n		10.1016/j.brat.2013.05.004
boucekine2015	Boucekine M, Boyer L, Baumstarck K, Millier A, Ghattas B, Auquier P, Toumi M.	2015	Exploring the response shift effect on the quality of life of patients with schizophrenia: an application of the random forest method	n	n	n	n	n	n	n	y	n		10.1192/bjp.2019.8
boucher2019	Boucher, Marie-Eve; Groleau, Danielle; Whitley, Rob	2019	Recovery from severe mental illness in Quebec: The role of culture and place	n	n	n	n	n	n	n	y	n		10.3390/su9030352
bouras2018	Bouras N, Ikkos G, Craig T.	2018	From Community to Meta-Community Mental Health Care	n	n	n	n	n	n	n	y	n		10.1111/eip.12874
bourque2014	Bourque F, Willox AC.	2014	Climate change: the next challenge for public mental health?	n	n	n	n	n	n	n	y	n		x
bowen2016	Bowen DJ, Neill JT, Crisp SJR.	2016	Wilderness adventure therapy effects on the mental health of youth participants	n	n	n	n	n	n	n	y	n		10.1007/s00420-012-0807-z
bowles2015	Bowles DC.	2015	Climate Change and Health Adaptation: Consequences for Indigenous Physical and Mental Health	n	n	n	n	n	n	n	y	n		10.3389/fgene.2020.00713
br2017	Br??ggmann D, Wagner C, Klingelh?┬fer D, Sch?┬ffel N, Bendels M, Louwen F, Jaque J, Groneberg DA.	2017	Maternal depression research: socioeconomic analysis and density-equalizing mapping of the global research architecture	n	n	n	n	n	n	n	y	n		10.1016/j.neuropharm.2019.107861
brahnam2014	Brahnam, Sheryl; Brooks, Anthony L.	2014	Two Innovative Healthcare Technologies at the Intersection of Serious Games, Alternative Realities, and Play Therapy	n	n	n	n	n	n	n	y	n		10.1177/0308022619836954
braithwaite2019	Braithwaite I, Zhang S, Kirkbride JB, Osborn DPJ, Hayes JF.	2019	Air Pollution (Particulate Matter) Exposure and Associations with Depression, Anxiety, Bipolar, Psychosis and Suicide Risk: A Systematic Review and Meta-Analysis	n	n	n	n	n	n	n	y	n		10.1177/216507991206000104
bratman2012	Bratman GN, Hamilton JP, Daily GC.	2012	The impacts of nature experience on human cognitive function and mental health	n	n	n	n	n	n	n	y	n		10.4015/S1016237217500041
bratman2015	Bratman GN, Hamilton JP, Hahn KS, Daily GC, Gross JJ.	2015	Nature experience reduces rumination and subgenual prefrontal cortex activation	n	n	n	n	n	n	n	y	n		10.1177/1363461520901642
bratman2019	Bratman GN, Anderson CB, Berman MG, Cochran B, de Vries S, Flanders J, Folke C, Frumkin H, Gross JJ, Hartig T, Kahn PH Jr, Kuo M, Lawler JJ, Levin PS, Lindahl T, Meyer-Lindenberg A, Mitchell R, Ouyang Z, Roe J, Scarlett L, Smith JR, van den Bosch M, Wheeler BW, White MP, Zheng H, Daily GC.	2019	Nature and mental health: An ecosystem service perspective	n	n	n	n	n	n	n	y	n		10.1080/19406940.2016.1230554
breslin2017	Breslin, Gavin; Haughey, Tandy Jane; Donnelly, Paul; Kearney, Ciaran; Prentice, Garry	2017	Promoting mental health awareness in sport clubs	n	n	n	n	n	n	n	y	n		10.1016/j.scitotenv.2019.133639
brew2016	Brew B, Inder K, Allen J, Thomas M, Kelly B.	2016	The health and wellbeing of Australian farmers: a longitudinal cohort study	n	n	n	n	n	n	n	y	n		10.1037/dev0000272
brock2015	Brock RL, O'Hara MW, Hart KJ, McCabe-Beane JE, Williamson JA, Brunet A, Laplante DP, Yu C, King S.	2015	Peritraumatic Distress Mediates the Effect of Severity of Disaster Exposure on Perinatal Depression: The Iowa Flood Study	n	n	n	n	n	n	n	y	n		10.1037/str0000092
bronzaft2010	Bronzaft AL.	2010	Abating New York City transit noise: a matter of will, not way	n	n	n	n	n	n	n	y	n		10.1177/1460458219887823
brown2014	Brown DK, Barton JL, Pretty J, Gladwell VF.	2014	Walks4Work: assessing the role of the natural environment in a workplace physical activity intervention	n	n	n	n	n	n	n	y	n		10.1002/dev.21778
brown2017	Brown, Nicholas J. L.; Coyne, James C.	2017	Emodiversity: Robust Predictor of Outcomes or Statistical Artifact?	n	n	n	n	n	n	n	y	n		10.1080/13607863.2013.799119
brown2018	Brown SC, Perrino T, Lombard J, Wang K, Toro M, Rundek T, Gutierrez CM, Dong C, Plater-Zyberk E, Nardi MI, Kardys J, Szapocznik J.	2018	Health Disparities in the Relationship of Neighborhood Greenness to Mental Health Outcomes in 249,405 U.S. Medicare Beneficiaries	n	n	n	n	n	n	n	y	n		10.1177/1937586717705085
brown2019a	Brown SM, Bender K, Orsi R, McCrae JS, Phillips JD, Rienks S.	2019	Adverse childhood experiences and their relationship to complex health profiles among child welfare-involved children: A classification and regression tree analysis	n	n	n	n	n	n	n	y	n		10.1093/sw/swaa022
brown2019b	Brown MRG, Agyapong V, Greenshaw AJ, Cribben I, Brett-MacLean P, Drolet J, McDonald-Harker C, Omeje J, Mankowsi M, Noble S, Kitching D, Silverstone PH.	2019	After the Fort McMurray wildfire there are significant increases in mental health symptoms in grade 7-12 students compared to controls	n	n	n	n	n	n	n	y	n		x
brown2019c	Brown MRG, Agyapong V, Greenshaw AJ, Cribben I, Brett-MacLean P, Drolet J, McDonald-Harker C, Omeje J, Mankowsi M, Noble S, Kitching D, Silverstone PH.	2019	Correction to: After the Fort McMurray wildfire there are significant increases in mental health symptoms in grade 7-12 students compared to controls	n	n	n	n	n	n	n	y	n		10.1097/AUD.0000000000000642
brown2019d	Brown MRG, Agyapong V, Greenshaw AJ, Cribben I, Brett-MacLean P, Drolet J, McDonald-Harker C, Omeje J, Mankowsi M, Noble S, Kitching DT, Silverstone PH.	2019	Significant PTSD and Other Mental Health Effects Present 18 Months After the Fort Mcmurray Wildfire: Findings From 3,070 Grades 7-12 Students	n	n	n	n	n	n	n	y	n		10.1016/j.psychres.2015.05.080
brown2020a	Brown SP, Davis HE, McGladrey L, Brooks L, Lorentzen AK, Penninga L, Davis C, Lemery J.	2020	Psychological Care Augmented by Telemedicine after a Polar Bear Encounter at an Arctic Research Station: A Case Report	n	n	n	n	n	n	n	y	n		10.3390/nu10060660
browning2018	Browning MHEM, Rigolon A.	2018	Do Income, Race and Ethnicity, and Sprawl Influence the Greenspace-Human Health Link in City-Level Analyses? Findings from 496 Cities in the United States	n	n	n	n	n	n	n	y	n		10.3978/j.issn.2223-4292.2013.02.01
brubaker2011	Brubaker M, Berner J, Chavan R, Warren J.	2011	Climate change and health effects in Northwest Alaska	n	n	n	n	n	n	n	y	n		10.2196/14360
brumby2011	Brumby S, Chandrasekara A, McCoombe S, Kremer P, Lewandowski P.	2011	Farming fit? Dispelling the Australian agrarian myth	n	n	n	n	n	n	n	y	n		10.1108/DPM-09-2015-0206
brunst2019	Brunst KJ, Ryan PH, Altaye M, Yolton K, Maloney T, Beckwith T, LeMasters G, Cecil KM.	2019	Myo-inositol mediates the effects of traffic-related air pollution on generalized anxiety symptoms at age 12ÈÃ╗years	n	n	n	n	n	n	n	y	n		10.1186/s12888-019-2096-5
bryant2013	Bryant, Lia; Gamham, Bridget	2013	Beyond discourses of drought: The micro-politics of the wine industry and farmer distress	n	n	n	n	n	n	n	y	n		10.1016/j.eatbeh.2019.01.005
bryant2014	Bryant, Lia; Garnham, Bridget	2014	Economies, ethics and emotions: Farmer distress within the moral economy of agribusiness	n	n	n	n	n	n	n	y	n		10.29158/JAAPL.003831-19
bryant2015	Bryant, Lia; Garnham, Bridget	2015	The fallen hero: masculinity, shame and farmer suicide in Australia	n	n	n	n	n	n	n	y	n		10.1080/10590501.2014.941279
buckley2017	Buckley, Ralf C.; Brough, Paula	2017	Economic Value of Parks via Human Mental Health: An Analytical Framework	n	n	n	n	n	n	n	y	n		10.1155/2013/737926
buckley2018	Buckley RC.	2018	Aging Adventure Athletes Assess Achievements and Alter Aspirations to Maintain Self-Esteem	n	n	n	n	n	n	n	y	n		10.1007/s40471-015-0043-7
buckley2020	Buckley, Ralf	2020	Nature tourism and mental health: parks, happiness, and causation	n	n	n	n	n	n	n	y	n		10.4103/1117-1936.196242
bunce2016	Bunce, Anna; Ford, James; Harper, Sherilee; Edge, Victoria	2016	Vulnerability and adaptive capacity of Inuit women to climate change: a case study from Iqaluit, Nunavut	n	n	n	n	n	n	n	y	n		10.3390/en13112881
bunz2017	Bunz M, M??cke HG.	2017	[Climate change - physical and mental consequences]	n	n	n	n	n	n	n	y	n		10.1017/S2045796019000283
buoli2018	Buoli M, Grassi S, Caldiroli A, Carnevali GS, Mucci F, Iodice S, Cantone L, Pergoli L, Bollati V.	2018	Is there a link between air pollution and mental disorders?	n	n	n	n	n	n	n	y	n		10.3390/su12041498
burke2018	Burke SEL, Sanson AV, Van Hoorn J.	2018	The Psychological Effects of Climate Change on Children	n	n	n	n	n	n	n	y	n		10.1186/s13643-019-1043-3
burley2018	Burley BA.	2018	Green infrastructure and violence: Do new street trees mitigate violent crime?	n	n	n	n	n	n	n	y	n		10.1007/s40572-020-00280-7
burns2015	Burns JK.	2015	Poverty, inequality and a political economy of mental health	n	n	n	n	n	n	n	y	n		10.1017/ipm.2014.46
burns2018	Burns, S. Barnett; Szyszkowicz, J. Kasia; Luheshi, Giamal N.; Lutz, Pierre-Eric; Turecki, Gustavo	2018	Plasticity of the epigenome during early-life stress	n	n	n	n	n	n	n	y	n		10.32604/cmes.2019.06272
burt2010	Burt SA.	2010	Are there shared environmental influences on attention-deficit/hyperactivity disorder? Reply to Wood, Buitelaar, Rijsdijk, Asherson, and Kuntsi [corrected] (2010)	n	n	n	n	n	n	n	y	n		10.1109/TNSRE.2019.2911970
burton2016	Burton, Hilary; Rabito, Felicia; Danielson, Lisa; Takaro, Tim K.	2016	Health effects of flooding in Canada: A 2015 review and description of gaps in research	n	n	n	n	n	n	n	y	n		10.1007/s00787-013-0396-8
busch2010	Busch AB, Wilder CM, Van Dorn RA, Swartz MS, Swanson JW.	2010	Changes in guideline-recommended medication possession after implementing Kendra's law in New York	n	n	n	n	n	n	n	y	n		10.3390/ijerph16183373
butler2018	Butler C, Walker-Springett K, Adger WN.	2018	Narratives of recovery after floods: Mental health, institutions, and intervention	n	n	n	n	n	n	n	y	n		10.1371/journal.pone.0125582
buttke2012	Buttke D, Vagi S, Bayleyegn T, Sircar K, Strine T, Morrison M, Allen M, Wolkin A.	2012	Mental health needs assessment after the Gulf Coast oil spill-Alabama and Mississippi, 2010	n	n	n	n	n	n	n	y	n		10.1186/1476-072X-10-36
buttke2012a	Buttke, Danielle; Vagi, Sara; Schnall, Amy; Bayleyegn, Tesfaye; Morrison, Melissa; Allen, Mardi; Wolkin, Amy	2012	Community Assessment for Public Health Emergency Response (CASPER) One Year Following the Gulf Coast Oil Spill: Alabama and Mississippi, 2011	n	n	n	n	n	n	n	y	n		10.1080/09603123.2019.1669768
caamano2011	Caamano-Isorna F, Figueiras A, Sastre I, Montes-Mart?ínez A, Taracido M, Pi??eiro-Lamas M.	2011	Respiratory and mental health effects of wildfires: an ecological study in Galician municipalities (north-west Spain)	n	n	n	n	n	n	n	y	n		10.1371/journal.pone.0153132
cairney2018	Cairney, John; McGannon, Kerry R.; Atkinson, Michael	2018	Exercise is medicine: critical considerations in the qualitative research landscape INTRODUCTION	n	n	n	n	n	n	n	y	n		10.1016/j.ijdrr.2016.05.009
calder2017	Calder??n-Garcidue??as L, de la Monte SM.	2017	Apolipoprotein E4, Gender, Body Mass Index, Inflammation, Insulin Resistance, and Air Pollution Interactions: Recipe for Alzheimer's Disease Development in Mexico City Young Females	n	n	n	n	n	n	n	y	n		x
came2020	Came HA, Tudor K.	2020	The whole and inclusive university: a critical review of health promoting universities from Aotearoa New Zealand	n	n	n	n	n	n	n	y	n		10.1051/matecconf/20152201044
campbell2019	Campbell, Justin S.; Wallace, Meredith L.; Germain, Anne; Koffman, Robert L.	2019	A Predictive Analytic Approach to Planning Combat Stress Control Operations	n	n	n	n	n	n	n	y	n		10.1016/j.inffus.2019.04.001
canan2020	Canan F, North CS.	2020	The Association between General and Pathological Dissociation and Disaster-Related Psychopathology in Directly Exposed Survivors	n	n	n	n	n	n	n	y	n		10.1007/s40258-014-0098-5
cao2018	Cao, Huai; Sun, Yuwen	2018	A Case Study of Air Cleaner by the Intelligent Interaction and Emotion	n	n	n	n	n	n	n	y	n		10.3390/ijerph17051703
capra2013	Capra L, Tezza G, Mazzei F, Boner AL.	2013	The origins of health and disease: the influence of maternal diseases and lifestyle during gestation	n	n	n	n	n	n	n	y	n		10.1016/j.landurbplan.2020.103823
caramanica2015	Caramanica K, Brackbill RM, Stellman SD, Farfel MR.	2015	Posttraumatic Stress Disorder after Hurricane Sandy among Persons Exposed to the 9/11 Disaster	n	n	n	n	n	n	n	y	n		10.1016/j.envres.2019.108884
carlyle2019	Carlyle D.	2019	Walking in rhythm with Deleuze and a dog inside the classroom: being and becoming well and happy together	n	n	n	n	n	n	n	y	n		10.3390/ijerph17114142
carnie2011	Carnie TL, Berry HL, Blinkhorn SA, Hart CR.	2011	In their own words: young people's mental health in drought-affected rural and remote NSW	n	n	n	n	n	n	n	y	n		10.1007/s40894-015-0013-9
carr2020	Carr D, Boerner K, Moorman S.	2020	Bereavement in the Time of Coronavirus: Unprecedented Challenges Demand Novel Interventions	n	n	n	n	n	n	n	y	y		10.1371/currents.dis.1d49e84c8bbe678b0e70cf7fc35d0b77
carroll2010	Carroll B, Balogh R, Morbey H, Araoz G.	2010	Health and social impacts of a flood disaster: responding to needs and implications for practice	n	n	n	n	n	n	n	y	n		10.13075/ijomeh.1896.01326
casanova2020	Casanova R, Saldana S, Lutz MW, Plassman BL, Kuchibhatla M, Hayden KM.	2020	Investigating Predictors of Cognitive Decline Using Machine Learning	n	n	n	n	n	n	n	y	n		10.1016/j.jenvman.2019.05.028
castelpietra2017	Castelpietra, G.; Salvador-Carulla, L.; Almborg, A. -H.; Fernandez, A.; Madden, R.	2017	Working draft: Classifications of interventions in mental health care. An expert review	n	n	n	n	n	n	n	y	n		10.18666/JPRA-2018-V36-I1-8095
castledine2011	Castledine G.	2011	Sleep and insomnia	n	n	n	n	n	n	n	y	n		10.1080/00224499.2019.1665619
caye2019	Caye A, Agnew-Blais J, Arseneault L, Gon?║alves H, Kieling C, Langley K, Menezes AMB, Moffitt TE, Passos IC, Rocha TB, Sibley MH, Swanson JM, Thapar A, Wehrmeister F, Rohde LA.	2019	A risk calculator to predict adult attention-deficit/hyperactivity disorder: generation and external validation in three birth cohorts and one clinical sample	n	n	n	n	n	n	n	y	n		10.1080/04353684.2017.1408028
cerin2020	Cerin E, Barnett A, Chaix B, Nieuwenhuijsen MJ, Caeyenberghs K, Jalaludin B, Sugiyama T, Sallis JF, Lautenschlager NT, Ni MY, Poudel G, Donaire-Gonzalez D, Tham R, Wheeler AJ, Knibbs L, Tian L, Chan YK, Dunstan DW, Carver A, Anstey KJ.	2020	International Mind, Activities and Urban Places (iMAP) study: methods of a cohort study on environmental and lifestyle influences on brain and cognitive health	n	n	n	n	n	n	n	y	n		10.1037/a0025176
cerletti2020	Cerletti P, Eze IC, Schaffner E, Foraster M, Viennau D, Cajochen C, Wunderli JM, R?┬?┬sli M, Stolz D, Pons M, Imboden M, Probst-Hensch N.	2020	The independent association of source-specific transportation noise exposure, noise annoyance and noise sensitivity with health-related quality of life	n	n	n	n	n	n	n	y	n		10.1186/1471-2202-15-36
chadwin2017	Chadwin R.	2017	Evacuation of Pets During Disasters: A Public Health Intervention to Increase Resilience	n	n	n	n	n	n	n	y	n		10.2989/17280583.2015.1120215
chalupka2020	Chalupka, Stephanie; Anderko, Laura; Pennea, Emma	2020	Climate Change, Climate Justice, and Children's Mental Health: A Generation at Risk?	n	n	n	n	n	n	n	y	n		10.1109/TBCAS.2015.2504959
chan2018	Chan EYY, Lam HCY, So SHW, Goggins WB, Ho JY, Liu S, Chung PPW.	2018	Association between Ambient Temperatures and Mental Disorder Hospitalizations in a Subtropical City: A Time-Series Study of Hong Kong Special Administrative Region	n	n	n	n	n	n	n	y	n		10.1186/1752-0509-9-S4-S2
chan2019	Chan EYY, Ho JY, Hung HHY, Liu S, Lam HCY.	2019	Health impact of climate change in cities of middle-income countries: the case of China	n	n	n	n	n	n	n	y	n		10.1080/19349637.2017.1326091
chang2014	Chang KH, Chang MY, Muo CH, Wu TN, Chen CY, Kao CH.	2014	Increased risk of dementia in patients exposed to nitrogen dioxide and carbon monoxide: a population-based retrospective cohort study	n	n	n	n	n	n	n	y	n		10.4103/1463-1741.59994
chang2017	Chang, Chien Kai; Yang, Shu-Fei; Ho, Li-Chih; Chien, Hui-Lin	2017	Landscape Preference In Taiwanese School-Aged Children	n	n	n	n	n	n	n	y	n		10.1177/1363461513498111
channaveerachari2015	Channaveerachari NK, Raj A, Joshi S, Paramita P, Somanathan R, Chandran D, Kasi S, Bangalore NR, Math SB.	2015	Psychiatric and medical disorders in the after math of the uttarakhand disaster: assessment, approach, and future challenges	n	n	n	n	n	n	n	y	n		10.2196/mhealth.5437
charlton2014	Charlton R, Gravenor MB, Rees A, Knox G, Hill R, Rahman MA, Jones K, Christian D, Baker JS, Stratton G, Brophy S.	2014	Factors associated with low fitness in adolescents--a mixed methods study	n	n	n	n	n	n	n	y	n		10.1016/j.envint.2014.06.002
chase2017	Chase L, Sapkota RP.	2017	"In our community, a friend is a psychologist": An ethnographic study of informal care in two Bhutanese refugee communities	n	n	n	n	n	n	n	y	n		10.5665/sleep.2002
chen2012	Chen CH, Chi MT, Huang HM, Sun FK.	2012	[Traumatic response experiences: one year after Typhoon Morakot]	n	n	n	n	n	n	n	y	n		10.1007/s11414-011-9245-z
chen2013	Chen J, Chen S, Landry PF.	2013	Migration, environmental hazards, and health outcomes in China	n	n	n	n	n	n	n	y	n		10.1146/annurev-publhealth-040617-013603
chen2017	Chen, Hao; Liu, Shubing; Lin, Yingchao	2017	Effect of Haze on Human Health and Prevention	n	n	n	n	n	n	n	y	n		10.3109/14992027.2014.943847
chen2018	Chen G, Jin Z, Li S, Jin X, Tong S, Liu S, Yang Y, Huang H, Guo Y.	2018	Early life exposure to particulate matter air pollution (PM(1), PM(2.5) and PM(10)) and autism in Shanghai, China: A case-control study	n	n	n	n	n	n	n	y	n		10.3389/fnagi.2017.00033
chen2018a	Chen S, Kong J, Yu F, Peng K.	2018	Psychopathological Symptoms under Smog: The Role of Emotion Regulation	n	n	n	n	n	n	n	y	n		10.1123/jpah.2016-0503
chen2019a	Chen G, Xiang H, Mao Z, Huo W, Guo Y, Wang C, Li S.	2019	Is long-term exposure to air pollution associated with poor sleep quality in rural China?	n	n	n	n	n	n	n	y	n		10.3389/fpsyt.2017.00007
chen2020	Chen JA, Chung WJ, Young SK, Tuttle MC, Collins MB, Darghouth SL, Longley R, Levy R, Razafsha M, Kerner JC, Wozniak J, Huffman JC.	2020	COVID-19 and telepsychiatry: Early outpatient experiences and implications for the future	n	n	n	n	n	n	n	y	y		10.1176/appi.ps.201800028
chen2020a	Chen Y, Yuan Y.	2020	The neighborhood effect of exposure to blue space on elderly individuals' mental health: A case study in Guangzhou, China	n	n	n	n	n	n	n	y	n		10.1016/j.ijheh.2018.10.004
chen2020c	Chen C, Luo W, Li H, Zhang D, Kang N, Yang X, Xia Y.	2020	Impact of Perception of Green Space for Health Promotion on Willingness to Use Parks and Actual Use among Young Urban Residents	n	n	n	n	n	n	n	y	n		10.1186/s12919-018-0159-0
cheng2018	Cheng K, Wand A, Ryan C, Callaghan S.	2018	An algorithm for managing adults who refuse medical treatment in New South Wales	n	n	n	n	n	n	n	y	n		10.1002/jts.22368
cheong2020	Cheong JLY, Burnett AC, Treyvaud K, Spittle AJ.	2020	Early environment and long-term outcomes of preterm infants	n	n	n	n	n	n	n	y	n		10.1016/j.bpsc.2020.05.008
cherry2015	Cherry KE, Sampson L, Nezat PF, Cacamo A, Marks LD, Galea S.	2015	Long-term psychological outcomes in older adults after disaster: relationships to religiosity and social support	n	n	n	n	n	n	n	y	n		10.3390/ijerph15091806
cherry2017	Cherry, Katie E.; Sampson, Laura; Galea, Sandro; Marks, Loren D.; Nezat, Pamela F.; Baudoin, Kayla H.; Lyon, Bethany A.	2017	Optimism and Hope After Multiple Disasters: Relationships to Health-Related Quality of Life	n	n	n	n	n	n	n	y	n		10.1007/s40596-018-0907-5
cherry2017a	Cherry N, Haynes W.	2017	Effects of the Fort McMurray wildfires on the health of evacuated workers: follow-up of 2 cohorts	n	n	n	n	n	n	n	y	n		x
chersich2018	Chersich MF, Wright CY, Venter F, Rees H, Scorgie F, Erasmus B.	2018	Impacts of Climate Change on Health and Wellbeing in South Africa	n	n	n	n	n	n	n	y	n		10.1080/03630242.2011.643348
chirico2019	Chirico F, Magnavita N.	2019	Letter to the editor (January 1, 2019) concerning the paper "Impact of air pollution on depression and suicide"	n	n	n	n	n	n	n	y	n		10.1111/hsc.13069
choi2016	Choi KH, Lim MH, Ha M, Sohn JN, Kang JW, Choi YH, Cheong HK.	2016	Psychological Vulnerability of Residents of Communities Affected by the Hebei Spirit Oil Spill	n	n	n	n	n	n	n	y	n		10.7196/SAMJ.2016.v106i7.10945
choi2018	Choi, Jihye	2018	Perceptions of forest contact and its therapeutic role in university students in South Korea	n	n	n	n	n	n	n	y	n		x
chowdhury2016	Chowdhury AN, Brahma A, Mondal R, Biswas MK.	2016	Stigma of tiger attack: Study of tiger-widows from Sundarban Delta, India	n	n	n	n	n	n	n	y	n		10.1037/dev0000243
chowdhury2016a	Chowdhury AN, Mondal R, Brahma A, Biswas MK.	2016	Ecopsychosocial Aspects of Human-Tiger Conflict: An Ethnographic Study of Tiger Widows of Sundarban Delta, India	n	n	n	n	n	n	n	y	n		x
christian2013	Christian, A.; Aikins, A. de-Graft; Lartey, A.	2013	CLIMATE VARIABILITY ON CAREGIVER'S MENTAL HEALTH AND CHILD NUTRITIONAL STATUS	n	n	n	n	n	n	n	y	n		10.1007/s40265-020-01284-1
chung2014	Chung B, Ong M, Ettner SL, Jones F, Gilmore J, McCreary M, Sherbourne C, Ngo V, Koegel P, Tang L, Dixon E, Miranda J, Belin TR, Wells KB.	2014	12-month outcomes of community engagement versus technical assistance to implement depression collaborative care: a partnered, cluster, randomized, comparative effectiveness trial	n	n	n	n	n	n	n	y	n		10.1016/j.neuroimage.2018.04.051
cianconi2015	Cianconi, P.; Tarricone, I.; Ventriglio, A.; De Rosa, C.; Fiorillo, A.; Saito, T.; Bhugra, D.	2015	Psychopathology in postmodern societies	n	n	n	n	n	n	n	y	n		10.1080/15459624.2016.1179388
cianconi2019	Cianconi P, Lesmana CBJ, Ventriglio A, Janiri L.	2019	Mental health issues among indigenous communities and the role of traditional medicine	n	n	n	n	n	n	n	y	n		10.1111/1475-6773.13166
cipriani2018	Cipriani G, Danti S, Carlesi C, Borin G.	2018	Danger in the Air: Air Pollution and Cognitive Dysfunction	n	n	n	n	n	n	n	y	n		10.1111/bdi.12491
clayton2018	Clayton, Susan	2018	Mental health risk and resilience among climate scientists	n	n	n	n	n	n	n	y	n		10.2105/AJPH.2014.302087
clayton2020	Clayton S.	2020	Climate anxiety: Psychological responses to climate change	n	n	n	n	n	n	n	y	n		10.1016/S1836-9553(11)70056-X
cleary2018	Cleary EG, Cifuentes M, Grinstein G, Brugge D, Shea TB.	2018	Association of Low-Level Ozone with Cognitive Decline in Older Adults	n	n	n	n	n	n	n	y	n		10.1016/j.psychres.2017.11.083
cleaveland2014	Cleaveland S, Borner M, Gislason M.	2014	Ecology and conservation: contributions to One Health	n	n	n	n	n	n	n	y	n		10.1016/j.psychres.2017.09.080
clemens2013	Clemens SL, Berry HL, McDermott BM, Harper CM.	2013	Summer of sorrow: measuring exposure to and impacts of trauma after Queensland's natural disasters of 2010-2011	n	n	n	n	n	n	n	y	n		10.3998/jmmh.10381607.0009.101
cole2015	Cole, F.; Christie, M.	2015	Researching wellbeing in a woodland: participant and researcher occupational engagement	n	n	n	n	n	n	n	y	n		10.1007/s10597-015-9928-7
cole2016a	Cole, F.; Christie, M.	2016	Occupational engagement in a woodland: belonging and wellbeing for mental health	n	n	n	n	n	n	n	y	n		10.3109/08039488.2013.767373
coles2010	Coles G, Fuller B, Nordquist K, Weissenberger S, Anderson L, DuBois B.	2010	Three kinds of proactive risk analyses for health care	n	n	n	n	n	n	n	y	n		10.1186/s12888-018-2007-1
coll2019	Coll KM, Sawyer S, Scholl S, Hauser N.	2019	A logic model development for an adolescent based intervention to improve benefits from Therapeutic Residential Care (TRC)	n	n	n	n	n	n	n	y	n		10.1007/s10900-010-9312-z
collier2020	Collier KM, Weiss B, Pollack A, Lam T.	2020	Explanatory variables for women's increased risk for mental health problems in Vietnam	n	n	n	n	n	n	n	y	n		10.1016/j.jecp.2019.104676
collins2013	Collins TW, Jimenez AM, Grineski SE.	2013	Hispanic health disparities after a flood disaster: results of a population-based survey of individuals experiencing home site damage in El Paso (Texas, USA)	n	n	n	n	n	n	n	y	n		10.1016/j.socscimed.2018.11.012
collins2015	Collins PY, Musisi S, Frehywot S, Patel V.	2015	The core competencies for mental, neurological, and substance use disorder care in sub-Saharan Africa	n	n	n	n	n	n	n	y	n		10.1523/JNEUROSCI.2332-14.2015
collins2016	Collins, Julie; Avey, Susan; Lekkas, Peter	2016	Lost landscapes of healing: the decline of therapeutic mental health landscapes	n	n	n	n	n	n	n	y	n		10.1093/cercor/bht336
collins2018	Collins KRL, Legendre MN, Stritzke WGK, Page AC.	2018	Experimentally-enhanced perceptions of meaning confer resilience to the interpersonal adversity implicated in suicide risk	n	n	n	n	n	n	n	y	n		10.1080/13825585.2016.1210080
combs2016	Combs, Katie Massey; Hoag, Matthew J.; Roberts, Sean D.; Javorski, Stephen	2016	A Multilevel Model to Examine Adolescent Outcomes in Outdoor Behavioral Healthcare: The Parent Perspective	n	n	n	n	n	n	n	y	n		10.1016/j.psychres.2020.113145
committee2015	Committee on Developing Evidence-Based Standards for Psychosocial Interventions for Mental Disorders; Board on Health Sciences Policy; Institute of Medicine; England MJ, Butler AS, Gonzalez ML, editors.	2015	Psychosocial Interventions for Mental and Substance Use Disorders: A Framework for Establishing Evidence-Based Standards	n	n	n	n	n	n	n	y	n		10.3389/fpsyg.2018.00225
connerton2019	Connerton CS, Wooton AK.	2019	Building Community Resilience to Mitigate Mental Health Effects of Climate Change	n	n	n	n	n	n	n	y	n		10.1093/geront/gnw033
connolly2014	Connolly A, O'Callaghan D, O'Brien O, Broderick J, Long C, O'Grady I.	2014	The development of counselling psychology in Ireland	n	n	n	n	n	n	n	y	n		10.1111/jgs.16321
conrad2017	Conrad D, Wilker S, Pfeiffer A, Lingenfelder B, Ebalu T, Lanzinger H, Elbert T, Kolassa IT, Kolassa S.	2017	Does trauma event type matter in the assessment of traumatic load?	n	n	n	n	n	n	n	y	n		10.1177/0143034314529912
contreras2018	Contreras C, Aguilar M, Eappen B, Guzm?Ýn C, Carrasco P, Millones AK, Galea JT.	2018	Community strengthening and mental health system linking after flooding in two informal human settlements in Peru: a model for small-scale disaster response	n	n	n	n	n	n	n	y	n		10.1017/S2045796019000623
cooper2019	Cooper, Sarah; Hutchings, Paul; Butterworth, John; Joseph, Solome; Kebede, Abinet; Parker, Alison; Terefe, Bethel; Van Koppen, Barbara	2019	Environmental associated emotional distress and the dangers of climate change for pastoralist mental health	n	n	n	n	n	n	n	y	n		10.1289/EHP4595
cooper2020	Cooper C, Aguirre E, Barber JA, Bass N, Brodaty H, Burton A, Higgs P, Hunter R, Huntley J, Lang I, Kales HC, Marchant NL, Minihane AM, Ritchie K, Morgan-Trimmer S, Walker Z, Walters K, Wenborn J, Rapaport P.	2020	APPLE-Tree (Active Prevention in People at risk of dementia: Lifestyle, bEhaviour change and Technology to REducE cognitive and functional decline) programme: Protocol	n	n	n	n	n	n	n	y	n		10.1212/WNL.0000000000009345
coovadia2016	Coovadia, H.; Jugnundan, Y.; Ramkissoon, A.	2016	Adolescence: The age of Proteus	n	n	n	n	n	n	n	y	n		10.1097/EDE.0000000000000405
cope2013	Cope MR, Slack T, Blanchard TC, Lee MR.	2013	Does time heal all wounds? Community attachment, natural resource employment, and health impacts in the wake of the BP Deepwater Horizon disaster	n	n	n	n	n	n	n	y	n		10.3233/JAD-180631
cortinovis2018	Cortinovis, Chiara; Zulian, Grazia; Geneletti, Davide	2018	Assessing Nature-Based Recreation to Support Urban Green Infrastructure Planning in Trento (Italy)	n	n	n	n	n	n	n	y	n		10.3390/ijerph14111392
costello2019	Costello L, McDermott ML, Patel P, Dare J.	2019	'A lot better than medicine' - Self-organised ocean swimming groups as facilitators for healthy ageing	n	n	n	n	n	n	n	y	n		10.3390/ijerph17124190
crabtree2013	Crabtree, Andrew	2013	Questioning Psychosocial Resilience After Flooding and the Consequences for Disaster Risk Reduction	n	n	n	n	n	n	n	y	n		10.1017/S1041610220001428
craig2014	Craig, J.	2014	WHAT IS THE CURRENT SITUATION? HOW DID WE GET HERE? WHAT DO WE THINK OF THE EVOLVING LANDSCAPE IN MENTAL HEALTH?	n	n	n	n	n	n	n	y	n		10.1590/1980-5497201700020001
crawford2012	Crawford MA, Broadhurst CL.	2012	The role of docosahexaenoic and the marine food web as determinants of evolution and hominid brain development: the challenge for human sustainability	n	n	n	n	n	n	n	y	n		10.3390/su12030950
creviston2018	Creviston J, Polacek M.	2018	Get on Board: Realizing Full Partnerships in Health Care	n	n	n	n	n	n	n	y	n		10.1111/bdi.12922
crombach2018	Crombach A, Siehl S.	2018	Impact and cultural acceptance of the Narrative Exposure Therapy in the aftermath of a natural disaster in Burundi	n	n	n	n	n	n	n	y	n		10.1016/j.envres.2019.108644
crombie2011	Crombie R, Clark C, Stansfeld SA.	2011	Environmental noise exposure, early biological risk and mental health in nine to ten year old children: a cross-sectional field study	n	n	n	n	n	n	n	y	n		10.3233/JAD-200289
cucurachi2012	Cucurachi S, Heijungs R, Ohlau K.	2012	Towards a general framework for including noise impacts in LCA	n	n	n	n	n	n	n	y	n		10.1097/EDE.0000000000000133
cunsolo2018	Cunsolo, Ashlee; Ellis, Neville R.	2018	Ecological grief as a mental health response to climate change-related loss	n	n	n	n	n	n	n	y	n		10.1016/j.envint.2019.105448
curran2018	Curran J, Ritchie SD, Beardy J, VanderBurgh D, Born K, Lewko J, Orkin AM.	2018	Conceptualizing and Managing Medical Emergencies Where No Formal Paramedical System Exists: Perspectives from a Remote Indigenous Community in Canada	n	n	n	n	n	n	n	y	n		10.1007/s11356-019-06612-x
cusack2011	Cusack L, de Crespigny C, Athanasos P.	2011	Heatwaves and their impact on people with alcohol, drug and mental health conditions: a discussion paper on clinical practice considerations	n	n	n	n	n	n	n	y	n		10.1109/ACCESS.2019.2917277
cyniak2019	Cyniak-Cieciura M, Zawadzki B.	2019	The Relationship Between Temperament Traits and Post-Traumatic Stress Disorder Symptoms and Its Moderators: Meta-Analysis and Meta-Regression	n	n	n	n	n	n	n	y	n		10.1016/j.envres.2017.02.008
da2017	da Cal Seixas, Sonia Regina; Nunes, Richard Joseph	2017	Subjectivity in a context of environmental change: opening new dialogues in mental health research	n	n	n	n	n	n	n	y	n		10.1186/s12940-018-0418-6
dadvand2012	Dadvand P, de Nazelle A, Figueras F, Basaga??a X, Su J, Amoly E, Jerrett M, Vrijheid M, Sunyer J, Nieuwenhuijsen MJ.	2012	Green space, health inequality and pregnancy	n	n	n	n	n	n	n	y	n		10.1080/19419899.2019.1661278
dadvand2015	Dadvand P, Nieuwenhuijsen MJ, Esnaola M, Forns J, Basaga??a X, Alvarez-Pedrerol M, Rivas I, L??pez-Vicente M, De Castro Pascual M, Su J, Jerrett M, Querol X, Sunyer J.	2015	Green spaces and cognitive development in primary schoolchildren	n	n	n	n	n	n	n	y	n		10.1111/cogs.12539
dadvand2016	Dadvand P, Bartoll X, Basaga??a X, Dalmau-Bueno A, Martinez D, Ambros A, Cirach M, Triguero-Mas M, Gascon M, Borrell C, Nieuwenhuijsen MJ.	2016	Green spaces and General Health: Roles of mental health status, social support, and physical activity	n	n	n	n	n	n	n	y	n		10.1192/bjpo.bp.115.001339
dadvand2017	Dadvand P, Tischer C, Estarlich M, Llop S, Dalmau-Bueno A, L??pez-Vicente M, Valent?ín A, de Keijzer C, Fern?Ýndez-Somoano A, Lertxundi N, Rodriguez-Dehli C, Gascon M, Guxens M, Zugna D, Basaga??a X, Nieuwenhuijsen MJ, Ibarluzea J, Ballester F, Sunyer J.	2017	Lifelong Residential Exposure to Green Space and Attention: A Population-based Prospective Study	n	n	n	n	n	n	n	y	n		10.1016/j.euroneuro.2020.06.004
dadvand2019	Dadvand P, Hariri S, Abbasi B, Heshmat R, Qorbani M, Motlagh ME, Basaga??a X, Kelishadi R.	2019	Use of green spaces, self-satisfaction and social contacts in adolescents: A population-based CASPIAN-V study	n	n	n	n	n	n	n	y	n		10.1021/acschemneuro.6b00357
dai2016	Dai W, Wang J, Kaminga AC, Chen L, Tan H, Lai Z, Deng J, Liu A.	2016	Predictors of recovery from post-traumatic stress disorder after the dongting lake flood in China: a 13-14 year follow-up study	n	n	n	n	n	n	n	y	n		10.1371/journal.pone.0199826
dai2016a	Dai W, Chen L, Tan H, Wang J, Lai Z, Kaminga AC, Li Y, Liu A.	2016	Association between social support and recovery from post-traumatic stress disorder after flood: a 13-14 year follow-up study in Hunan, China	n	n	n	n	n	n	n	y	n		10.1146/annurev-publhealth-040218-044058
dales2016	Dales RE, Cakmak S.	2016	Does Mental Health Status Influence Susceptibility to the Physiologic Effects of Air Pollution? A Population Based Study of Canadian Children	n	n	n	n	n	n	n	y	n		10.1016/j.envres.2018.04.015
d'alessandro2015	D'Alessandro D, Buffoli M, Capasso L, Fara GM, Rebecchi A, Capolongo S; Hygiene on Built EnvironmentWorking Group on Healthy Buildings of the Italian Society of Hygiene, Preventive Medicine and Public Health (SItI).	2015	Green areas and public health: improving wellbeing and physical activity in the urban context	n	n	n	n	n	n	n	y	n		10.1021/acschemneuro.5b00171
daley2013	Daley D, O'Brien M.	2013	A small-scale randomized controlled trial of the self-help version of the New Forest Parent Training Programme for children with ADHD symptoms	n	n	n	n	n	n	n	y	n		10.1146/annurev-clinpsy-050718-095617
dancause2015	Dancause KN, Laplante DP, Hart KJ, O'Hara MW, Elgbeili G, Brunet A, King S.	2015	Prenatal stress due to a natural disaster predicts adiposity in childhood: the Iowa Flood Study	n	n	n	n	n	n	n	y	n		10.1017/S1748499518000015
d'angiulli2018	D'Angiulli A.	2018	Severe Urban Outdoor Air Pollution and Children's Structural and Functional Brain Development, From Evidence to Precautionary Strategic Action	n	n	n	n	n	n	n	y	n		10.1177/1039856218758565
dannenberg2019	Dannenberg, Andrew L.; Frumkin, Howard; Hess, Jeremy J.; Ebi, Kristie L.	2019	Managed retreat as a strategy for climate change adaptation in small communities: public health implications	n	n	n	n	n	n	n	y	n		10.1155/2020/4789806
dar2018	Dar KA, Iqbal N, Prakash A, Paul MA.	2018	PTSD and depression in adult survivors of flood fury in Kashmir: The payoffs of social support	n	n	n	n	n	n	n	y	n		x
darabi2018	Darabi, H.; Hamedi, R.; Ehsani, A. H.; Kafi, M.	2018	Rapid Vulnerability Assessment of Lavizan Urban Forest Park	n	n	n	n	n	n	n	y	n		10.3889/oamjms.2015.068
davidson2010	Davidson, Graham R.; Carr, Stuart C.	2010	Forced Migration, Social Exclusion and Poverty: Introduction	n	n	n	n	n	n	n	y	n		10.1177/1757913909355221
davis2016	Davis A, McMahon CM, Pichora-Fuller KM, Russ S, Lin F, Olusanya BO, Chadha S, Tremblay KL.	2016	Aging and Hearing Health: The Life-course Approach	n	n	n	n	n	n	n	y	n		10.1080/14623730.2014.963402
davis2019	Davis AN, Carlo G, Gulseven Z, Palermo F, Lin CH, Nagel SC, Vu DC, Vo PH, Ho TL, McElroy JA.	2019	Exposure to environmental toxicants and young children's cognitive and social development	n	n	n	n	n	n	n	y	n		10.1007/s10393-015-1052-1
de2015	de Ribaupierre, Anik	2015	Why Should Cognitive Developmental Psychology Remember that Individuals Are Different?	n	n	n	n	n	n	n	y	n		x
de2017	De Silva, Tamishka; Prakash, Anjali; Yarlagadda, Sandhya; Johns, Marjia Daniella; Sandy, Kate; Hansen, Vibeke; Phelan, Sue; Pit, Sabrina	2017	General practitioners' experiences and perceptions of mild moderate depression management and factors influencing effective service delivery in rural Australian communities: a qualitative study	n	n	n	n	n	n	n	y	n		10.1080/17496535.2014.884611
de2017a	de Ara??jo TM, Ara??jo TM, Palma TF, Ara??jo NDC.	2017	Work-related Mental Health Surveillance in Brazil: characteristics, difficulties, and challenges	n	n	n	n	n	n	n	y	n		10.1192/bjb.2018.42
de2018	de Prado Bert P, Mercader EMH, Pujol J, Sunyer J, Mortamais M.	2018	The Effects of Air Pollution on the Brain: a Review of Studies Interfacing Environmental Epidemiology and Neuroimaging	n	n	n	n	n	n	n	y	n		10.1016/j.envres.2015.04.008
de2018a	De Ribaupierre A, Lecerf T.	2018	On the Importance of Intraindividual Variability in Cognitive Development	n	n	n	n	n	n	n	y	n		10.3390/ani9060303
de2019	de Keijzer C, Tonne C, Sabia S, Basaga??a X, Valent?ín A, Singh-Manoux A, Ant?? JM, Alonso J, Nieuwenhuijsen MJ, Sunyer J, Dadvand P.	2019	Green and blue spaces and physical functioning in older adults: Longitudinal analyses of the Whitehall II study	n	n	n	n	n	n	n	y	n		10.1037/ort0000313
dean2010	Dean JG, Stain HJ.	2010	Mental health impact for adolescents living with prolonged drought	n	n	n	n	n	n	n	y	n		10.1007/s10531-016-1142-6
dean2011	Dean J, van Dooren K, Weinstein P.	2011	Does biodiversity improve mental health in urban settings?	n	n	n	n	n	n	n	y	n		10.2147/NDT.S90966
deighton2018	Deighton J, Humphrey N, Belsky J, Boehnke J, Vostanis P, Patalay P.	2018	Longitudinal pathways between mental health difficulties and academic performance during middle childhood and early adolescence	n	n	n	n	n	n	n	y	n		10.1007/s00018-018-2943-4
del2016a	Del Campo N, Cesari M, Canevelli M, Hoogendijk EO, Lilamand M, Kelaiditi E, Soto ME, Ousset PJ, Weiner MW, Andrieu S, Vellas B; ICTUS and REAL.FR/DSA groups.	2016	Refining Mild-to-Moderate Alzheimer Disease Screening: A Tool for Clinicians	n	n	n	n	n	n	n	y	n		10.1007/s11633-019-1197-4
dellaringa2018	Dell'Aringa M, Ranzani O, Bierens J, Murray V.	2018	Rio's Mountainous Region ("Regi?·o Serrana") 2011 Landslides: Impact on Public Mental Health System	n	n	n	n	n	n	n	y	n		10.1016/j.buildenv.2017.06.046
demarest2013	Demarest J, Pagsuyoin S, Learmonth G, Mellor J, Dillingham R.	2013	Development of a Spatial and Temporal Agent-Based Model for Studying Water and Health Relationships: The Case Study of Two Villages in Limpopo, South Africa	n	n	n	n	n	n	n	y	n		10.1117/12.2211490
demler2020	Demler, Tammie Lee	2020	Assessing the Current Anti psychotics Landscape	n	n	n	n	n	n	n	y	n		10.1691/ph.2016.6725
dempsey2018	Dempsey S, Devine MT, Gillespie T, Lyons S, Nolan A.	2018	Coastal blue space and depression in older adults	n	n	n	n	n	n	n	y	n		10.1016/j.atmosenv.2019.117187
deng2017	Deng, Quanlong; Jiang, Zhongan; Sun, Yaru; Peng, Ya	2017	Occupational hazard evaluation model underground coal mine based on unascertained measurement theory	n	n	n	n	n	n	n	y	n		10.1016/j.inffus.2019.09.002
di2020	Di Giorgi E, Michielin P, Michielin D.	2020	Perception of climate change, loss of social capital and mental health in two groups of migrants from African countries	n	n	n	n	n	n	n	y	n		10.3389/fneur.2017.00189
diaz2011	Diaz JH.	2011	The legacy of the Gulf oil spill: analyzing acute public health effects and predicting chronic ones in Louisiana	n	n	n	n	n	n	n	y	n		10.1111/appy.12375
diaz2020	D?íaz J, L??pez-Bueno JA, L??pez-Ossorio JJ, G??nz?Ýlez JL, S?Ýnchez F, Linares C.	2020	Short-term effects of traffic noise on suicides and emergency hospital admissions due to anxiety and depression in Madrid (Spain)	n	n	n	n	n	n	n	y	n		10.1007/978-3-030-00810-9_1
dick2018	Dick DM.	2018	Mapping Risk from Genes to Behavior: The Enduring and Evolving Influence of Irving Gottesman's Endophenotype Concept	n	n	n	n	n	n	n	y	n		x
ding2016	Ding N, Berry HL, Bennett CM.	2016	The Importance of Humidity in the Relationship between Heat and Population Mental Health: Evidence from Australia	n	n	n	n	n	n	n	y	n		10.1016/j.envres.2020.109613
dionne2018	Dionne-Odom JN, Ejem D, Azuero A, Taylor RA, Rocque GB, Turkman Y, Thompson MA, Knight SJ, Martin MY, Bakitas MA.	2018	Factors Associated with Family Caregivers' Confidence in Future Surrogate Decision Making for Persons with Cancer	n	n	n	n	n	n	n	y	n		10.1002/brb3.1502
dipnall2016	Dipnall JF, Pasco JA, Berk M, Williams LJ, Dodd S, Jacka FN, Meyer D.	2016	Into the Bowels of Depression: Unravelling Medical Symptoms Associated with Depression by Applying Machine-Learning Techniques to a Community Based Population Sample	n	n	n	n	n	n	n	y	n		10.1145/3267305.3267534
divandari2016	Divandari, Javad; Emamian, Zahra Sadat	2016	THE ROLE OF STRUCTURAL ELEMENTS OF PERSIAN GARDEN IN MENTAL HEALTH	n	n	n	n	n	n	n	y	n		10.1002/bsl.2367
d'monte2015	D'monte, Silviya; Panchal, Dakshata	2015	Data Mining Approach for Diagnose of Anxiety Disorder	n	n	n	n	n	n	n	y	n		10.1038/s41380-018-0272-5
dodd2018	Dodd W, Scott P, Howard C, Scott C, Rose C, Cunsolo A, Orbinski J.	2018	Lived experience of a record wildfire season in the Northwest Territories, Canada	n	n	n	n	n	n	n	y	n		10.1111/jcpp.12470
dolan2012	Dolan P, Lee H, Peasgood T.	2012	Losing sight of the wood for the trees: some issues in describing and valuing health, and another possible approach	n	n	n	n	n	n	n	y	n		10.1111/jcpp.13156
dolling2017	Dolling, Ann; Nilsson, Hanna; Lundell, Ylva	2017	Stress recovery in forest or handicraft environments - An intervention study	n	n	n	n	n	n	n	y	n		10.1111/jcpp.12503
donald2015	Donald F, Duff C, Lee S, Kroschel J, Kulkarni J.	2015	Consumer perspectives on the therapeutic value of a psychiatric environment	n	n	n	n	n	n	n	y	n		10.3366/jbctv.2019.0469
donnelly2016	Donnelly AA, MacIntyre TE, O'Sullivan N, Warrington G, Harrison AJ, Igou ER, Jones M, Gidlow C, Brick N, Lahart I, Cloak R, Lane AM.	2016	Environmental Influences on Elite Sport Athletes Well Being: From Gold, Silver, and Bronze to Blue Green and Gold	n	n	n	n	n	n	n	y	n		10.1037/emo0000521
donovan2018	Donovan, Ryan; Healy, Michael; Zheng, Huiru; Engel, Felix; Binh Vu; Fuchs, Michael; Walsh, Paul; Hemmje, Matthias; Mc Kevitt, Paul	2018	SenseCare: Using Automatic Emotional Analysis to Provide Effective Tools for Supporting Wellbeing	n	n	n	n	n	n	n	y	n		10.3233/JAD-161299
downey2016	Downey, Greg	2016	Being Human in Cities Phenotypic Bias from Urban Niche Construction	n	n	n	n	n	n	n	y	n		10.1155/2014/637098
dreger2015	Dreger S, Meyer N, Fromme H, Bolte G; Study Group of the GME cohort.	2015	Environmental noise and incident mental health problems: A prospective cohort study among school children in Germany	n	n	n	n	n	n	n	y	n		10.1002/gps.5249
drescher2014	Drescher CF, Schulenberg SE, Smith CV.	2014	The Deepwater Horizon Oil Spill and the Mississippi Gulf Coast: Mental health in the context of a technological disaster	n	n	n	n	n	n	n	y	n		10.2196/17119
dreyer2018	Dreyer BC, Coulombe S, Whitney S, Riemer M, Labb?« D.	2018	Beyond Exposure to Outdoor Nature: Exploration of the Benefits of a Green Building's Indoor Environment on Wellbeing	n	n	n	n	n	n	n	y	n		10.1016/j.dcn.2019.100624
dsouza2020	Dsouza DD, Quadros S, Hyderabadwala ZJ, Mamun MA.	2020	Aggregated COVID-19 suicide incidences in India: Fear of COVID-19 infection is the prominent causative factor	n	n	n	n	n	n	n	y	y		10.1016/j.socscimed.2016.01.006
du2010	Du W, FitzGerald GJ, Clark M, Hou XY.	2010	Health impacts of floods	n	n	n	n	n	n	n	y	n		10.1177/1745691618805436
du2018	Du J, Zhang Y, Luo J, Jia Y, Wei Q, Tao C, Xu H.	2018	Extracting psychiatric stressors for suicide from social media using deep learning	n	n	n	n	n	n	n	y	n		10.1007/s10865-018-9949-0
duarte2015	Duarte-Tagles H, Salinas-Rodr?íguez A, Idrovo ?³J, B??rquez A, Corral-Verdugo V.	2015	[Biodiversity and depressive symptoms in Mexican adults: Exploration of beneficial environmental effects]	n	n	n	n	n	n	n	y	n		10.3390/nu9060602
duarte2015a	Duarte, Joana; Pinto-Gouveia, Jose	2015	FOCUSING ON SELF OR OTHERS HAS DIFFERENT CONSEQUENCES FOR PSYCHOLOGICAL WELL-BEING: A LONGITUDINAL STUDY OF THE EFFECTS OF DISTINCT INTERPERSONAL GOALS	n	n	n	n	n	n	n	y	n		10.1007/s10926-013-9455-8
dumont2020	Dumont C, Haase E, Dolber T, Lewis J, Coverdale J.	2020	Climate Change and Risk of Completed Suicide	n	n	n	n	n	n	n	y	n		10.1037/a0019116
dunleavy2020	Dunleavy, Gerard; Bajpai, Ram; Tonon, Andre Comiran; Cheung, Kei Long; Thuan-Quoc Thach; Rykov, Yuri; Soh, Chee-Kiong; de Vries, Hein; Car, Josip; Christopoulos, Georgios	2020	Prevalence of psychological distress and its association with perceived indoor environmental quality and workplace factors in under and aboveground workplaces	n	n	n	n	n	n	n	y	n		10.1007/s00775-019-01740-8
dunn2018	Dunn J, Runge R, Snyder M.	2018	Wearables and the medical revolution	n	n	n	n	n	n	n	y	n		10.1684/pnv.2017.0655
dustin2010	Dustin, Daniel L.; Bricker, Kelly S.; Schwab, Keri A.	2010	People and Nature: Toward an Ecological Model of Health Promotion	n	n	n	n	n	n	n	y	n		10.1001/archgenpsychiatry.2009.188
duvall2014	Duvall, Jason; Kaplan, Rachel	2014	Enhancing the well-being of veterans using extended group-based nature recreation experiences	n	n	n	n	n	n	n	y	n		10.1177/1039856219866323
dykxhoorn2017	Dykxhoorn J, Hatcher S, Roy-Gagnon MH, Colman I.	2017	Early life predictors of adolescent suicidal thoughts and adverse outcomes in two population-based cohort studies	n	n	n	n	n	n	n	y	n		10.1017/S0021875810001246
dyregrov2018	Dyregrov A, Yule W, Olff M.	2018	Children and natural disasters	n	n	n	n	n	n	n	y	n		10.1016/j.psc.2019.08.003
dzhambov2017	Dzhambov A, Tilov B, Markevych I, Dimitrova D.	2017	Residential road traffic noise and general mental health in youth: The role of noise annoyance, neighborhood restorative quality, physical activity, and social cohesion as potential mediators	n	n	n	n	n	n	n	y	n		10.1136/bmjopen-2018-022731
dzhambov2017a	Dzhambov, A.; Markevych, I.; Tilov, B.; Dimitrova, D.	2017	Residential greenspace modifies the effect of road traffic noise exposure on mental health in youth	n	n	n	n	n	n	n	y	n		10.1109/ICHI-W.2018.00015
dzhambov2018	Dzhambov A, Hartig T, Markevych I, Tilov B, Dimitrova D.	2018	Urban residential greenspace and mental health in youth: Different approaches to testing multiple pathways yield different conclusions	n	n	n	n	n	n	n	y	n		10.1007/s12671-014-0326-y
dzhambov2018a	Dzhambov AM, Markevych I, Hartig T, Tilov B, Arabadzhiev Z, Stoyanov D, Gatseva P, Dimitrova DD.	2018	Multiple pathways link urban green- and bluespace to mental health in young adults	n	n	n	n	n	n	n	y	n		10.3390/land7040112
dzhambov2018b	Dzhambov AM, Markevych I, Tilov B, Arabadzhiev Z, Stoyanov D, Gatseva P, Dimitrova DD.	2018	Pathways linking residential noise and air pollution to mental ill-health in young adults	n	n	n	n	n	n	n	y	n		10.3389/fnins.2018.00785
dzhambov2018c	Dzhambov, Angel M.; Markevych, Iana; Tilov, Boris G.; Dimitrova, Donka D.	2018	Residential greenspace might modify the effect of road traffic noise exposure on general mental health in students	n	n	n	n	n	n	n	y	n		10.1016/j.envint.2020.105737
dzhambov2018d	Dzhambov AM.	2018	Residential green and blue space associated with better mental health: a pilot follow-up study in university students	n	n	n	n	n	n	n	y	n		10.1186/s12887-020-02220-8
dzhambov2019	Dzhambov AM, Hartig T, Tilov B, Atanasova V, Makakova DR, Dimitrova DD.	2019	Residential greenspace is associated with mental health via intertwined capacity-building and capacity-restoring pathways	n	n	n	n	n	n	n	y	n		10.1186/s12879-019-4373-9
ebesutani2012	Ebesutani C, Bernstein A, Chorpita BF, Weisz JR.	2012	A transportable assessment protocol for prescribing youth psychosocial treatments in real-world settings: reducing assessment burden via self-report scales	n	n	n	n	n	n	n	y	n		10.1093/jamia/ocx130
eckenwiler2018	Eckenwiler, Lisa	2018	Displacement and solidarity: An ethic of place-making	n	n	n	n	n	n	n	y	n		x
edwards2010	Edwards SC, Jedrychowski W, Butscher M, Camann D, Kieltyka A, Mroz E, Flak E, Li Z, Wang S, Rauh V, Perera F.	2010	Prenatal exposure to airborne polycyclic aromatic hydrocarbons and children's intelligence at 5 years of age in a prospective cohort study in Poland	n	n	n	n	n	n	n	y	n		10.1016/j.jclepro.2019.07.021
ehrlich2020	Ehrlich C, Slattery M, Vilic G, Chester P, Crompton D.	2020	What happens when peer support workers are introduced as members of community-based clinical mental health service delivery teams: a qualitative study	n	n	n	n	n	n	n	y	n		10.1371/journal.pone.0170402
eibich2016	Eibich P, Krekel C, Demuth I, Wagner GG.	2016	Associations between Neighborhood Characteristics, Well-Being and Health Vary over the Life Course	n	n	n	n	n	n	n	y	n		10.1037/a0029144
eibl2017	Eibl JK, Morin K, Leinonen E, Marsh DC.	2017	The State of Opioid Agonist Therapy in Canada 20 Years after Federal Oversight	n	n	n	n	n	n	n	y	n		10.1080/13607863.2017.1370690
eisenman2015	Eisenman D, McCaffrey S, Donatello I, Marshal G.	2015	An Ecosystems and Vulnerable Populations Perspective on Solastalgia and Psychological Distress After a Wildfire	n	n	n	n	n	n	n	y	n		10.1016/j.cpr.2013.08.004
ejlskov2018	Ejlskov L, Wulff J, B?®ggild H, Kuh D, Stafford M.	2018	Assessing the relative importance of correlates of loneliness in later life. Gaining insight using recursive partitioning	n	n	n	n	n	n	n	y	n		10.3109/14992027.2014.909053
eklund2016	Eklund ML, Ruud I, Grov EK.	2016	The forest as a classroom: preparing for mental health practice	n	n	n	n	n	n	n	y	n		10.1016/j.jalz.2011.03.009
ell2016	Ell, Kathleen; Oh, Hyunsung; Wu, Shinyi	2016	Integrating Biopsychosocial Intervention Research in a Changing Health Care Landscape	n	n	n	n	n	n	n	y	n		10.1016/j.chc.2017.11.003
ellis2017	Ellis NR, Albrecht GA.	2017	Climate change threats to family farmers' sense of place and mental wellbeing: A case study from the Western Australian Wheatbelt	n	n	n	n	n	n	n	y	n		x
elovanio2020	Elovanio M, Hakulinen C, Pulkki-R?Ðback L, Aalto AM, Virtanen M, Partonen T, Suvisaari J.	2020	General Health Questionnaire (GHQ-12), Beck Depression Inventory (BDI-6), and Mental Health Index (MHI-5): psychometric and predictive properties in a Finnish population-based sample	n	n	n	n	n	n	n	y	n		10.1088/1755-1315/56/1/012019
engemann2018	Engemann K, Pedersen CB, Arge L, Tsirogiannis C, Mortensen PB, Svenning JC.	2018	Childhood exposure to green space - A novel risk-decreasing mechanism for schizophrenia?	n	n	n	n	n	n	n	y	n		10.1017/dmp.2013.42
engemann2019	Engemann K, Pedersen CB, Arge L, Tsirogiannis C, Mortensen PB, Svenning JC.	2019	Residential green space in childhood is associated with lower risk of psychiatric disorders from adolescence into adulthood	n	n	n	n	n	n	n	y	n
engemann2020	Engemann K, Svenning JC, Arge L, Brandt J, Erikstrup C, Geels C, Hertel O, Mortensen PB, Plana-Ripoll O, Tsirogiannis C, Sabel CE, Sigsgaard T, Pedersen CB.	2020	Associations between growing up in natural environments and subsequent psychiatric disorders in Denmark	n	n	n	n	n	n	n	y	n		10.1016/j.ijheh.2019.09.006
engemann2020a	Engemann K, Svenning JC, Arge L, Brandt J, Geels C, Mortensen PB, Plana-Ripoll O, Tsirogiannis C, Pedersen CB.	2020	Natural surroundings in childhood are associated with lower schizophrenia rates	n	n	n	n	n	n	n	y	n		10.3390/ijerph15040754
engemann2020b	Engemann K, Pedersen CB, Agerbo E, Arge L, B?®rglum AD, Erikstrup C, Hertel O, Hougaard DM, McGrath JJ, Mors O, Mortensen PB, Nordentoft M, Sabel CE, Sigsgaard T, Tsirogiannis C, Vilhj?Ýlmsson BJ, Werge T, Svenning JC, Horsdal HT.	2020	Association Between Childhood Green Space, Genetic Liability, and the Incidence of Schizophrenia	n	n	n	n	n	n	n	y	n		10.1093/gerona/glr185
english2020	English, Ned; Zhao, Chang; Brown, Kevin L.; Catlett, Charlie; Cagney, Kathleen	2020	Making Sense of Sensor Data: How Local Environmental Conditions Add Value to Social Science Research	n	n	n	n	n	n	n	y	n		10.1093/schbul/sbaa058
enssle2020	Enssle, Friederike; Kabisch, Nadja	2020	Urban green spaces for the social interaction, health and well-being of older people-An integrated view of urban ecosystem services and socio-environmental justice	n	n	n	n	n	n	n	y	n		10.1016/j.envint.2019.105146
eskelinen2017	Eskelinen, A.; Saarikivi, C.	2017	THE STUDENTS' LEARNING EXPERIENCES IN A MULTIPROFESSIONAL LIVING LAB	n	n	n	n	n	n	n	y	n		10.1289/EHP3169
eskenazi2020	Eskenazi B, Etzel RA, Sripada K, Cairns MR, Hertz-Picciotto I, Kordas K, Machado Torres JP, Mielke HW, Oulhote Y, Quir??s-Alcal?Ý L, Su?Ýrez-L??pez JR, Zlatnik MG.	2020	The International Society for Children's Health and the Environment Commits to Reduce Its Carbon Footprint to Safeguard Children's Health	n	n	n	n	n	n	n	y	n		10.1016/j.scitotenv.2019.134179
espinel2019	Espinel Z, Kossin JP, Galea S, Richardson AS, Shultz JM.	2019	Forecast: Increasing Mental Health Consequences From Atlantic Hurricanes Throughout the 21st Century	n	n	n	n	n	n	n	y	n		10.1136/bmjopen-2015-010004
ettekal2019	Ettekal I, Eiden RD, Nickerson AB, Schuetze P.	2019	Comparing alternative methods of measuring cumulative risk based on multiple risk indicators: Are there differential effects on children's externalizing problems?	n	n	n	n	n	n	n	y	n		10.1371/journal.pone.0195267
evans2014	Evans GW, Cassells RC.	2014	Childhood Poverty, Cumulative Risk Exposure, and Mental Health in Emerging Adults	n	n	n	n	n	n	n	y	n		10.1186/s12199-017-0659-y
evans2019	Evans GW.	2019	Projected Behavioral Impacts of Global Climate Change	n	n	n	n	n	n	n	y	n		10.1192/bjp.bp.114.156323
evered2016	Evered, Elizabeth	2016	The role of the urban landscape in restoring mental health in Sheffield, UK: service user perspectives	n	n	n	n	n	n	n	y	n		10.1186/s12889-016-2871-x
every2015	Every-Palmer, S.; McBride, S.	2015	CLIMATE CHANGE AND MENTAL HEALTH	n	n	n	n	n	n	n	y	n		10.1371/journal.pmed.1001792
every2016	Every-Palmer S, McBride S, Berry H, Menkes DB.	2016	Climate change and psychiatry	n	n	n	n	n	n	n	y	n		10.3390/ijerph16020173
eysel2012	Eysel-Gosepath K, Daut T, Pinger A, Lehmacher W, Erren T.	2012	Effects of noise in primary schools on health facets in German teachers	n	n	n	n	n	n	n	y	n		10.1289/EHP494
eze2020	Eze IC, Foraster M, Schaffner E, Vienneau D, Pieren R, Imboden M, Wunderli JM, Cajochen C, Brink M, R?┬?┬sli M, Probst-Hensch N.	2020	Incidence of depression in relation to transportation noise exposure and noise annoyance in the SAPALDIA study	n	n	n	n	n	n	n	y	n		10.1016/j.jalz.2016.08.003
falkenberg2020	Falkenberg LJ, Bellerby RGJ, Connell SD, Fleming LE, Maycock B, Russell BD, Sullivan FJ, Dupont S.	2020	Ocean Acidification and Human Health	n	n	n	n	n	n	n	y	n		10.3233/JAD-170658
fallon2013	Fallon B, Ma J, Allan K, Pillhofer M, Trocm?« N, Jud A.	2013	Opportunities for prevention and intervention with young children: lessons from the Canadian incidence study of reported child abuse and neglect	n	n	n	n	n	n	n	y	n		10.1016/j.addbeh.2015.06.020
fan2020	Fan T, Hu Y, Xin J, Zhao M, Wang J.	2020	Analyzing the genes and pathways related to major depressive disorder via a systems biology approach	n	n	n	n	n	n	n	y	n		10.1136/jech.2008.084574
farnham2017	Farnham A, Furrer R, Blanke U, Stone E, Hatz C, Puhan MA.	2017	The quantified self during travel: mapping health in a prospective cohort of travellers	n	n	n	n	n	n	n	y	n		10.1016/j.scitotenv.2020.139877
farshi2018	Farshi, Mahni Rahkar; Valizadeh, Leila; Zamanzadeh, Vahid; Rassouli, Maryam	2018	Social Context of Iranian Parents with Adolescents: A Qualitative Content Analysis	n	n	n	n	n	n	n	y	n		10.1001/jamanetworkopen.2019.8209
fearon2020	Fearon P.	2020	Opening up while locking down: how an Irish independent sector mental health service is responding to the COVID-19 crisis?	n	n	n	n	n	n	n	y	y		10.1080/02770903.2018.1502300
felix2015	Felix, Erika D.; Afifi, Walid	2015	THE ROLE OF SOCIAL SUPPORT ON MENTAL HEALTH AFTER MULTIPLE WILDFIRE DISASTERS	n	n	n	n	n	n	n	y	n		10.1016/j.envres.2020.109788
felix2015a	Felix E, Afifi T, Kia-Keating M, Brown L, Afifi W, Reyes G.	2015	Family functioning and posttraumatic growth among parents and youth following wildfire disasters	n	n	n	n	n	n	n	y	n		10.1159/000438700
felix2020	Felix ED, Nylund-Gibson K, Kia-Keating M, Liu SR, Binmoeller C, Terzieva A.	2020	The influence of flood exposure and subsequent stressors on youth social-emotional health	n	n	n	n	n	n	n	y	n		10.1016/j.envint.2019.05.040
fennell2016	Fennell, Kate M.; Jarrett, Claire E.; Kettler, Lisa J.; Dollman, James; Turnbull, Deborah A.	2016	Watching the bank balance build up then blow away and the rain clouds do the same: A thematic analysis of South Australian farmers' sources of stress during drought	n	n	n	n	n	n	n	y	n		10.1093/gerona/glz189
fernandes2014	Fernandes, Marcia Astres; Palucci Marziale, Maria Helena	2014	Occupational risks and illness among mental health workers	n	n	n	n	n	n	n	y	n		10.1007/s12529-015-9505-z
fernandes2020a	Fernandes GCM, Bellaguarda MLDR, Heideman ITSB, Meirelles BHS, Silva HLD, C?Ýrdenas ?³VR.	2020	Demands for psychosocial support from communities vulnerable to natural disasters	n	n	n	n	n	n	n	y	n		10.1080/19419899.2019.1690032
fernee2017	Fernee CR, Gabrielsen LE, Andersen AJ, Mesel T.	2017	Unpacking the Black Box of Wilderness Therapy: A Realist Synthesis	n	n	n	n	n	n	n	y	n		10.24095/hpcdp.39.4.02
fernee2019	Fernee CR, Mesel T, Andersen AJW, Gabrielsen LE.	2019	Therapy the Natural Way: A Realist Exploration of the Wilderness Therapy Treatment Process in Adolescent Mental Health Care in Norway	n	n	n	n	n	n	n	y	n		x
fernee2020	Fernee, Carina R.; Gabrielsen, Leiv E.; Andersen, Anders J. W.; Mesel, Terje	2020	Emerging stories of self: long-term outcomes of wilderness therapy in Norway	n	n	n	n	n	n	n	y	n		10.1017/gmh.2015.14
fillmore2011	Fillmore EP, Ramirez M, Roth L, Robertson M, Atchison CG, Peek-Asa C.	2011	After the waters receded: a qualitative study of university officials' disaster experiences during the Great Iowa Flood of 2008	n	n	n	n	n	n	n	y	n		10.1080/1067828X.2014.969856
findley2014	Findley PA, Isralowitz R, Reznik A.	2014	Emergency preparedness and intervention: social work education needs in Israel	n	n	n	n	n	n	n	y	n		10.1016/j.scitotenv.2020.137274
finsterwalder2017	Finsterwalder, Jorg; Foote, Jeff; Nicholas, Graeme; Taylor, Annabel; Hepi, Maria; Baker, Virginia; Dayal, Natasha	2017	Conceptual underpinnings for transformative research in a service ecosystems context to resolve social issues - framework foundations and extensions	n	n	n	n	n	n	n	y	n		10.1016/j.envint.2020.105906
firdaus2017	Firdaus, Ghuncha	2017	Built Environment and Health Outcomes: Identification of Contextual Risk Factors for Mental Well-being of Older Adults	n	n	n	n	n	n	n	y	n		10.1016/j.rcp.2017.01.010
fisher2015	Fisher, Pamela; Freshwater, Dawn	2015	An Emancipatory Approach to Practice and Qualitative Inquiry in Mental Health: Finding 'Voice' in Charles Taylor's Ethics of Identity	n	n	n	n	n	n	n	y	n		10.1038/s41598-020-64755-1
fisk2020	Fisk J, Khalid S, Reynolds SA, Williams CM.	2020	Effect of 4 weeks daily wild blueberry supplementation on symptoms of depression in adolescents	n	n	n	n	n	n	n	y	n		10.1016/j.mehy.2012.03.014
fistein2012	Fistein, Elizabeth; Bhamani, Amyn; Sobani, Zain A.; Baqir, Maryam; Bham, Nida Shahab; Beg, M. Asim	2012	Mental Health in the Wake of Flooding in Pakistan: An Ongoing Humanitarian Crisis (vol 22, pg 66, 2012)	n	n	n	n	n	n	n	y	n		10.3766/jaaa.15098
fitzgerald2016	Fitzgerald D, Rose N, Singh I.	2016	Revitalizing sociology: urban life and mental illness between history and the present	n	n	n	n	n	n	n	y	n		10.1145/3290607.3312812
fitzgerald2020	Fitzgerald KC, Pit SW, Rolfe M, McKenzie J, Matthews V, Longman J, Bailie R.	2020	Cross sectional analysis of depression amongst Australian rural business owners following cyclone-related flooding	n	n	n	n	n	n	n	y	n		10.1017/S2045796016000901
fleming2018a	Fleming, Lora E.; Leonardi, Giovanni S.; White, Mathew P.; Medlock, Jolyon; Alcock, Ian; Macintyre, Helen L.; Maguire, Kath; Nichols, Gordon; Wheeler, Benedict W.; Morris, George; Taylor, Tim; Hemming, Deborah; Lo Iacono, Gianni; Gillingham, Emma L.; Hansford, Kayleigh M.; Heaviside, Clare; Bone, Angie; Duarte-Davidson, Raquel	2018	Beyond Climate Change and Health: Integrating Broader Environmental Change and Natural Environments for Public Health Protection and Promotion in the UK	n	n	n	n	n	n	n	y	n		10.1038/s41467-019-11660-5
flores2020	Flores AB, Collins TW, Grineski SE, Chakraborty J.	2020	Disparities in Health Effects and Access to Health Care Among Houston Area Residents After Hurricane Harvey	n	n	n	n	n	n	n	y	n		10.1038/s41598-018-32562-4
fonseca2018	Fonseca-Pedrero E, Chan RCK, Debban?« M, Cicero D, Zhang LC, Brenner C, Barkus E, Linscott RJ, Kwapil T, Barrantes-Vidal N, Cohen A, Raine A, Compton MT, Tone EB, Suhr J, Mu??iz J, de Alb?«niz AP, Fumero A, Giakoumaki S, Tsaousis I, Preti A, Chmielewski M, Laloyaux J, Mechri A, Lahmar MA, Wuthrich V, Lar?®i F, Badcock JC, Jablensky A, Ortu??o-Sierra J.	2018	Comparisons of schizotypal traits across 12 countries: Results from the International Consortium for Schizotypy Research	n	n	n	n	n	n	n	y	n		10.1016/j.ebr.2019.100323
fordham2013	Fordham A.	2013	Camp promotes mental health and fun	n	n	n	n	n	n	n	y	n		10.1166/jmihi.2015.1418
forns2012	Forns J, Lertxundi N, Aranbarri A, Murcia M, Gascon M, Martinez D, Grellier J, Lertxundi A, Julvez J, Fano E, Go??i F, Grimalt JO, Ballester F, Sunyer J, Ibarluzea J.	2012	Prenatal exposure to organochlorine compounds and neuropsychological development up to two years of life	n	n	n	n	n	n	n	y	n		10.1166/jmihi.2017.2204
forns2017	Forns J, Dadvand P, Esnaola M, Alvarez-Pedrerol M, L??pez-Vicente M, Garcia-Esteban R, Cirach M, Basaga??a X, Guxens M, Sunyer J.	2017	Longitudinal association between air pollution exposure at school and cognitive development in school children over a period of 3.5 years	n	n	n	n	n	n	n	y	n		10.1016/j.jbi.2017.07.005
foudi2017	Foudi, Sebastien; Oses-Eraso, Nuria; Galarraga, Ibon	2017	The effect of flooding on mental health: Lessons learned for building resilience	n	n	n	n	n	n	n	y	n		10.1109/TNB.2014.2316811
foulkes2019	Foulkes L, McMillan D, Gregory AM.	2019	A bad night's sleep on campus: an interview study of first-year university students with poor sleep quality	n	n	n	n	n	n	n	y	n		10.3238/arztebl.2011.0001
fox2015	Fox AS, Oler JA, Shackman AJ, Shelton SE, Raveendran M, McKay DR, Converse AK, Alexander A, Davidson RJ, Blangero J, Rogers J, Kalin NH.	2015	Intergenerational neural mediators of early-life anxious temperament	n	n	n	n	n	n	n	y	n		10.3233/JAD-190837
fox2018	Fox KR, Ribeiro JD, Kleiman EM, Hooley JM, Nock MK, Franklin JC.	2018	Affect toward the self and self-injury stimuli as potential risk factors for nonsuicidal self-injury	n	n	n	n	n	n	n	y	n		10.1080/03086534.2011.543795
francisco2017	Francisco PW, Jacobs DE, Targos L, Dixon SL, Breysse J, Rose W, Cali S.	2017	Ventilation, indoor air quality, and health in homes undergoing weatherization	n	n	n	n	n	n	n	y	n		10.1002/wat2.1219
frantzidis2010	Frantzidis CA, Bratsas C, Klados MA, Konstantinidis E, Lithari CD, Vivas AB, Papadelis CL, Kaldoudi E, Pappas C, Bamidis PD.	2010	On the classification of emotional biosignals evoked while viewing affective pictures: an integrated data-mining-based approach for healthcare applications	n	n	n	n	n	n	n	y	n		10.1007/s10903-019-00929-y
freeman2012	Freeman, Claire; Dickinson, Katharine J. M.; Porter, Stefan; van Heezik, Yolanda	2012	My garden is an expression of me: Exploring householders' relationships with their gardens	n	n	n	n	n	n	n	y	n		10.1037/rep0000252
freina2014	Freina, Laura; Busi, Michela; Canessa, Andrea; Caponetto, Ilaria; Ott, Michela	2014	LEARNING TO COPE WITH STREET DANGERS: AN INTERACTIVE ENVIRONMENT FOR THE INTELLECTUALLY IMPAIRED	n	n	n	n	n	n	n	y	n		10.3390/ijerph16183336
freire2010	Freire C, Ramos R, Puertas R, Lopez-Espinosa MJ, Julvez J, Aguilera I, Cruz F, Fernandez MF, Sunyer J, Olea N.	2010	Association of traffic-related air pollution with cognitive development in children	n	n	n	n	n	n	n	y	n		10.1007/s11414-014-9441-8
french2019	French CE, Waite TD, Armstrong B, Rubin GJ; English National Study of Flooding and Health Study Group, Beck CR, Oliver I.	2019	Impact of repeat flooding on mental health and health-related quality of life: a cross-sectional analysis of the English National Study of Flooding and Health	n	n	n	n	n	n	n	y	n		10.1017/dmp.2018.84
frewen2020	Frewen P, Mistry D, Zhu J, Kielt T, Wekerle C, Lanius RA, Jetly R.	2020	Proof of Concept of an Eclectic, Integrative Therapeutic Approach to Mental Health and Well-Being Through Virtual Reality Technology	n	n	n	n	n	n	n	y	n		10.1176/appi.ps.201500235
friel2011	Friel S, Bowen K, Campbell-Lendrum D, Frumkin H, McMichael AJ, Rasanathan K.	2011	Climate change, noncommunicable diseases, and development: the relationships and common policy opportunities	n	n	n	n	n	n	n	y	n		x
friel2014	Friel S, Berry H, Dinh H, O'Brien L, Walls HL.	2014	The impact of drought on the association between food security and mental health in a nationally representative Australian sample	n	n	n	n	n	n	n	y	n		10.1007/s10916-018-0934-5
frueh2012	Frueh, B. Christopher; Lejuez, Carl W.; Beidel, Deborah C.	2012	Introduction to the Special Issue on Psychopathological Posttraumatic Reactions	n	n	n	n	n	n	n	y	n		10.1086/685710
fuentes2016	Fuentes, Carolina; Rodriguez, Iyubanit; Herskovic, Valeria	2016	Making Communication Frequency Tangible: How Green Is My Tree?	n	n	n	n	n	n	n	y	n		10.29158/JAAPL.003872-19
fuentes2020	Fuentes L, Asselin H, B?«lisle AC, Labra O.	2020	Impacts of Environmental Changes on Well-Being in Indigenous Communities in Eastern Canada	n	n	n	n	n	n	n	y	n		10.1080/08959420.2020.1764320
fullagar2018	Fullagar, Simone; O'Brien, Wendy	2018	Rethinking women's experiences of depression and recovery as emplacement: Spatiality, care and gender relations in rural Australia	n	n	n	n	n	n	n	y	n		10.1007/s10745-018-0044-5
furuyashiki2019	Furuyashiki A, Tabuchi K, Norikoshi K, Kobayashi T, Oriyama S.	2019	A comparative study of the physiological and psychological effects of forest bathing (Shinrin-yoku) on working age people with and without depressive tendencies	n	n	n	n	n	n	n	y	n		10.1186/1471-2458-13-1036
g2018	G?Úadka A, Rymaszewska J, Zato?õski T.	2018	Impact of air pollution on depression and suicide	n	n	n	n	n	n	n	y	n		10.3390/atmos9070245
gabrielsen2019	Gabrielsen, Leiv Einar; Eskedal, Leif Torvald; Mesel, Terje; Aasen, Gunnar Oland; Hirte, Martin; Kerlefsen, Reidun Erene; Palucha, Vibeke; Fernee, Carina Ribe	2019	The effectiveness of wilderness therapy as mental health treatment for adolescents in Norway: a mixed methods evaluation	n	n	n	n	n	n	n	y	n		10.1016/j.neuroimage.2019.06.037
gafencu2014	Gafencu, M.; Tomita, M.; Dragu, M.; Bajireanu, D.; Moron, M.; Stan, V	2014	Resilience centered approach for children during floods	n	n	n	n	n	n	n	y	n		10.1016/j.jrurstud.2013.03.002
ganesh2018	Ganesh C, Smith JA.	2018	Climate Change, Public Health, and Policy: A California Case Study	n	n	n	n	n	n	n	y	n		10.3389/fpsyg.2018.01583
ganguli2020	Ganguli M, Beer JC, Zmuda JM, Ryan CM, Sullivan KJ, Chang CH, Rao RH.	2020	Aging, Diabetes, Obesity, and Cognitive Decline: A Population-Based Study	n	n	n	n	n	n	n	y	n		10.1016/j.ecoser.2017.03.012
gao2011	Gao B, Reid WH, Li J.	2011	Forensic Psychiatry in the People's Republic of China	n	n	n	n	n	n	n	y	n		10.1016/j.envres.2017.08.033
gao2019	Gao T, Zhang T, Zhu L, Gao Y, Qiu L.	2019	Exploring Psychophysiological Restoration and Individual Preference in the Different Environments Based on Virtual Reality	n	n	n	n	n	n	n	y	n		10.3920/BM2018.0008
garc2019	Garc?ía-Alonso CR, Almeda N, Salinas-P?«rez JA, Guti?«rrez-Colos?ía MR, Uriarte-Uriarte JJ, Salvador-Carulla L.	2019	A decision support system for assessing management interventions in a mental health ecosystem: The case of Bizkaia (Basque Country, Spain)	n	n	n	n	n	n	n	y	n		10.1021/acs.est.6b05831
garcia2016	Garcia DM, Sheehan MC.	2016	Extreme Weather-driven Disasters and Children's Health	n	n	n	n	n	n	n	y	n		10.1093/bmb/ldy021
gardner2015	Gardner-Elahi, Catherine; Zamiri, Sannam	2015	Collective narrative practice in forensic mental health	n	n	n	n	n	n	n	y	n		10.1098/rsif.2015.0670
garg2012	Garg, Vikas; Garg, Hitta; Pai, Nagesh; Malesu, Rammohan	2012	GLOBAL WARMING AND MENTAL HEALTH	n	n	n	n	n	n	n	y	n		10.1007/s11199-019-01040-0
garrett2019	Garrett JK, Clitherow TJ, White MP, Wheeler BW, Fleming LE.	2019	Coastal proximity and mental health among urban adults in England: The moderating effect of household income	n	n	n	n	n	n	n	y	n		10.1111/cag.12273
garza2019	Garza-Lomb?? C, Pappa A, Panayiotidis MI, Gonsebatt ME, Franco R.	2019	Arsenic-induced neurotoxicity: a mechanistic appraisal	n	n	n	n	n	n	n	y	n		10.3390/ani10020193
gascon2018	Gascon M, S?Ýnchez-Benavides G, Dadvand P, Mart?ínez D, Gramunt N, Gotsens X, Cirach M, Vert C, Molinuevo JL, Crous-Bou M, Nieuwenhuijsen M.	2018	Long-term exposure to residential green and blue spaces and anxiety and depression in adults: A cross-sectional study	n	n	n	n	n	n	n	y	n		10.1080/02703149.2017.1241582
gaspar2015	Gaspar FW, Harley KG, Kogut K, Chevrier J, Mora AM, Sj?┬din A, Eskenazi B.	2015	Prenatal DDT and DDE exposure and child IQ in the CHAMACOS cohort	n	n	n	n	n	n	n	y	n		10.24043/isj.100
genc2012	Genc S, Zadeoglulari Z, Fuss SH, Genc K.	2012	The adverse effects of air pollution on the nervous system	n	n	n	n	n	n	n	y	n		10.1136/bmjopen-2017-016188
generaal2019	Generaal E, Timmermans EJ, Dekkers JEC, Smit JH, Penninx BWJH.	2019	Not urbanization level but socioeconomic, physical and social neighbourhood characteristics are associated with presence and severity of depressive and anxiety disorders	n	n	n	n	n	n	n	y	n		10.1177/0306624X17692060
generaal2019a	Generaal E, Hoogendijk EO, Stam M, Henke CE, Rutters F, Oosterman M, Huisman M, Kramer SE, Elders PJM, Timmermans EJ, Lakerveld J, Koomen E, Ten Have M, de Graaf R, Snijder MB, Stronks K, Willemsen G, Boomsma DI, Smit JH, Penninx BWJH.	2019	Neighbourhood characteristics and prevalence and severity of depression: pooled analysis of eight Dutch cohort studies	n	n	n	n	n	n	n	y	n		10.1097/MOT.0000000000000165
gibbs2013	Gibbs L, Waters E, Bryant RA, Pattison P, Lusher D, Harms L, Richardson J, MacDougall C, Block K, Snowdon E, Gallagher HC, Sinnott V, Ireton G, Forbes D.	2013	Beyond Bushfires: Community, Resilience and Recovery - a longitudinal mixed method study of the medium to long term impacts of bushfires on mental health and social connectedness	n	n	n	n	n	n	n	y	n		x
gibson2019	Gibson K, Haslam N, Kaplan I.	2019	Distressing encounters in the context of climate change: Idioms of distress, determinants, and responses to distress in Tuvalu	n	n	n	n	n	n	n	y	n		10.1002/hbm.24716
gibson2020	Gibson KE, Barnett J, Haslam N, Kaplan I.	2020	The mental health impacts of climate change: Findings from a Pacific Island atoll nation	n	n	n	n	n	n	n	y	n		10.1186/s13195-014-0069-y
gidlow2016	Gidlow, Christopher J.; Smith, Graham; Martinez, David; Wilson, Richard; Trinder, Paul; Grazuleviciene, Regina; Nieuwenhuijsen, Mark J.	2016	Research note: Natural environments and prescribing in England	n	n	n	n	n	n	n	y	n		10.1007/s10803-017-3381-0
gifford2016	Gifford, Eva; Gifford, Robert	2016	The largely unacknowledged impact of climate change on mental health	n	n	n	n	n	n	n	y	n		10.1111/ppe.12078
gillis2016	Gillis, Harold L., Jr.; Speelman, Elizabeth; Linville, Noelle; Bailey, Emily; Kalle, Ashley; Oglesbee, Nathan; Sandlin, James; Thompson, Lauren; Jensen, Jennifer	2016	Meta-analysis of Treatment Outcomes Measured by the Y-OQ and Y-OQ-SR Comparing Wilderness and Non-wilderness Treatment Programs	n	n	n	n	n	n	n	y	n		10.1891/1078-4535.25.3.e9
giovanis2018	Giovanis E, Ozdamar O.	2018	Health status, mental health and air quality: evidence from pensioners in Europe	n	n	n	n	n	n	n	y	n		10.1186/s12889-018-5870-2
gladkikh2019	Gladkikh, Tatiana M.; Gould, Rachelle K.; Coleman, Kimberly J.	2019	Cultural ecosystem services and the well-being of refugee communities	n	n	n	n	n	n	n	y	n		10.1016/j.amepre.2016.08.022
glover2011	Glover-Thomas N.	2011	Mental health law in motion--confronting new challenges in the modern psychiatric landscape	n	n	n	n	n	n	n	y	n		10.1007/s12126-016-9276-0
godsmark2019	Godsmark CN, Irlam J, van der Merwe F, New M, Rother HA.	2019	Priority focus areas for a sub-national response to climate change and health: A South African provincial case study	n	n	n	n	n	n	n	y	n		10.1136/bmjopen-2013-003334
goebel2011	Goebel, Eckart	2011	REALITY CHECK: FREUD GONE WILDE	n	n	n	n	n	n	n	y	n		10.1186/s40249-018-0481-9
goh2019	Goh NCK, Hancock N, Honey A, Scanlan JN.	2019	Thriving in an expanding service landscape: Experiences of occupational therapists working in generic mental health roles within non-government organisations in Australia	n	n	n	n	n	n	n	y	n		10.1097/NMD.0b013e31827189b1
gonz2010	Gonz?Ýlez Alonso S, Catal?Ý M, Maroto RR, Gil JL, de Miguel AG, Valc?Ýrcel Y.	2010	Pollution by psychoactive pharmaceuticals in the Rivers of Madrid metropolitan area (Spain)	n	n	n	n	n	n	n	y	n		10.1016/j.jpsychores.2010.01.002
gonzalez2018	Gonzalez-Casanova I, Stein AD, Barraza-Villarreal A, Feregrino RG, DiGirolamo A, Hernandez-Cadena L, Rivera JA, Romieu I, Ramakrishnan U.	2018	Prenatal exposure to environmental pollutants and child development trajectories through 7 years	n	n	n	n	n	n	n	y	n		10.3390/biom9100592
goodkind2017	Goodkind, Jessica R.; Amer, Suha; Christian, Charlisa; Hess, Julia Meredith; Bybee, Deborah; Isakson, Brian L.; Baca, Brandon; Ndayisenga, Martin; Greene, R. Neil; Shantzek, Cece	2017	Challenges and Innovations in a Community-Based Participatory Randomized Controlled Trial	n	n	n	n	n	n	n	y	n		10.1016/j.ceca.2014.02.005
goodwill2018	Goodwill JR, Watkins DC, Johnson NC, Allen JO.	2018	An exploratory study of stress and coping among Black college men	n	n	n	n	n	n	n	y	n		x
gospodarevskaya2012	Gospodarevskaya E, Segal L.	2012	Cost-utility analysis of different treatments for post-traumatic stress disorder in sexually abused children	n	n	n	n	n	n	n	y	n		10.3233/SHTI200551
gould2015	Gould DW, Teich JL, Pemberton MR, Pierannunzi C, Larson S.	2015	Behavioral health in the gulf coast region following the Deepwater Horizon oil spill: findings from two federal surveys	n	n	n	n	n	n	n	y	n		10.5751/ES-06787-190327
grabow2018	Grabow M, Bryan T, Checovich M, Converse A, Middlecamp C, Mooney M, Torres E, Younkin S, Barrett B.	2018	Mindfulness and Climate Change Action: A Feasibility Study	n	n	n	n	n	n	n	y	n		10.3389/fpsyt.2019.00593
grace2018	Grace R, Kemp L, Barnes J, Elcombe E, Knight J, Baird K, Webster V, Byrne F.	2018	Community Volunteer Support for Families With Young Children: Protocol for the Volunteer Family Connect Randomized Controlled Trial	n	n	n	n	n	n	n	y	n		10.3390/su10030644
grace2019	Grace R, Baird K, Elcombe E, Webster V, Barnes J, Kemp L.	2019	Effectiveness of the Volunteer Family Connect Program in Reducing Isolation of Vulnerable Families and Supporting Their Parenting: Randomized Controlled Trial With Intention-To-Treat Analysis of Primary Outcome Variables	n	n	n	n	n	n	n	y	n		10.3390/ijerph17020394
graham2019	Graham H, White P, Cotton J, McManus S.	2019	Flood- and Weather-Damaged Homes and Mental Health: An Analysis Using England's Mental Health Survey	n	n	n	n	n	n	n	y	n		10.1353/foc.2018.0002
grant2012	Grant WB.	2012	Polycyclic aromatic hydrocarbons, particulate air pollution, and cognitive decline	n	n	n	n	n	n	n	y	n		10.1080/02791072.2020.1762023
grauer2020	Grauer, Stuart R.	2020	Climate change: The thief of childhood	n	n	n	n	n	n	n	y	n		10.1080/00207578.2018.1425874
green2019	Green RE, Pain DJ.	2019	Risks to human health from ammunition-derived lead in Europe	n	n	n	n	n	n	n	y	n		10.1037/cou0000201
greene2015	Greene G, Paranjothy S, Palmer SR.	2015	Resilience and Vulnerability to the Psychological Harm From Flooding: The Role of Social Cohesion	n	n	n	n	n	n	n	y	n		10.1080/02827581.2015.1046482
greenhill2015	Greenhill JA, Walker J, Playford D.	2015	Outcomes of Australian rural clinical schools: a decade of success building the rural medical workforce through the education and training continuum	n	n	n	n	n	n	n	y	n		10.1007/s10943-016-0215-x
grellier2017	Grellier J, White MP, Albin M, Bell S, Elliott LR, Gasc??n M, Gualdi S, Mancini L, Nieuwenhuijsen MJ, Sarigiannis DA, van den Bosch M, Wolf T, Wuijts S, Fleming LE.	2017	BlueHealth: a study programme protocol for mapping and quantifying the potential benefits to public health and well-being from Europe's blue spaces	n	n	n	n	n	n	n	y	n		10.1080/14739879.2020.1772120
griffin2018	Griffin JA, Drescher CF, Eldridge ED, Rossi AL, Loew MM, Stepleman LM.	2018	Predictors of anxiety among sexual minority individuals in the Southern US	n	n	n	n	n	n	n	y	n		10.1098/rspb.2015.3056
griffiths2013	Griffiths J.	2013	Improving public health by tackling climate change	n	n	n	n	n	n	n	y	n		10.1016/j.drugpo.2019.06.012
grigorash2018	Grigorash A, O'Neill S, Bond R, Ramsey C, Armour C, Mulvenna MD.	2018	Predicting Caller Type From a Mental Health and Well-Being Helpline: Analysis of Call Log Data	n	n	n	n	n	n	n	y	n		10.1111/psyp.13656
grigsby2015	Grigsby-Toussaint DS, Turi KN, Krupa M, Williams NJ, Pandi-Perumal SR, Jean-Louis G.	2015	Sleep insufficiency and the natural environment: Results from the US Behavioral Risk Factor Surveillance System survey	n	n	n	n	n	n	n	y	n		10.1016/j.archger.2018.06.010
grineski2016	Grineski SE, Clark-Reyna SE, Collins TW.	2016	School-based exposure to hazardous air pollutants and grade point average: A multi-level study	n	n	n	n	n	n	n	y	n		10.1111/appy.12031
gruebner2011	Gruebner O, Khan MM, Lautenbach S, M??ller D, Kraemer A, Lakes T, Hostert P.	2011	A spatial epidemiological analysis of self-rated mental health in the slums of Dhaka	n	n	n	n	n	n	n	y	n		x
gruebner2012	Gruebner O, Khan MM, Lautenbach S, M??ller D, Kr?±mer A, Lakes T, Hostert P.	2012	Mental health in the slums of Dhaka - a geoepidemiological study	n	n	n	n	n	n	n	y	n		10.1037/lhb0000039
gruebner2017	Gruebner O, Rapp MA, Adli M, Kluge U, Galea S, Heinz A.	2017	Cities and Mental Health	n	n	n	n	n	n	n	y	n		10.1007/s11126-015-9380-4
gu2020a	Gu H, Yan W, Elahi E, Cao Y.	2020	Air pollution risks human mental health: an implication of two-stages least squares estimation of interaction effects	n	n	n	n	n	n	n	y	n		10.1111/j.1447-0349.2012.00853.x
guerrero2020	Guerrero APS, Fung D, Suaalii-Sauni T, Wiguna T.	2020	An update to "Care for the seafarers: A review of mental health in Austronesia," with specific recommendation to address climate change	n	n	n	n	n	n	n	y	n		10.1093/phe/phv008
guiney2012	Guiney R.	2012	Farming suicides during the Victorian drought: 2001-2007	n	n	n	n	n	n	n	y	n		10.3390/ijerph16245118
guirguis2014	Guirguis, Kristen; Gershunov, Alexander; Tardy, Alexander; Basu, Rupa	2014	The Impact of Recent Heat Waves on Human Health in California	n	n	n	n	n	n	n	y	n		10.1007/s00127-019-01744-4
gunn2012	Gunn KM, Kettler LJ, Skaczkowski GL, Turnbull DA.	2012	Farmers' stress and coping in a time of drought	n	n	n	n	n	n	n	y	n		10.1080/21695717.2018.1490117
guo2017	Guo, Yanxiang; Yang, Xiaoyi; Zhang, Jiao; Zhong, Chunbin; Li, Yilong; Hu, Xiping; Hu, Bin; Cheng, Jun; Ning, Zhaolong	2017	Emotion-Aware Smart Tips for Healthy and Happy Sleep	n	n	n	n	n	n	n	y	n		10.1177/1090198116639243
gupta2018	Gupta, Sumedha	2018	Impact of volunteering on cognitive decline of the elderly	n	n	n	n	n	n	n	y	n		10.1145/2858036.2858182
guxens2014	Guxens M, Garcia-Esteban R, Giorgis-Allemand L, Forns J, Badaloni C, Ballester F, Beelen R, Cesaroni G, Chatzi L, de Agostini M, de Nazelle A, Eeftens M, Fernandez MF, Fern?Ýndez-Somoano A, Forastiere F, Gehring U, Ghassabian A, Heude B, Jaddoe VW, Kl??mper C, Kogevinas M, Kr?±mer U, Larroque B, Lertxundi A, Lertxuni N, Murcia M, Navel V, Nieuwenhuijsen M, Porta D, Ramos R, Roumeliotaki T, Slama …	2014	Air pollution during pregnancy and childhood cognitive and psychomotor development: six European birth cohorts	n	n	n	n	n	n	n	y	n		10.1177/0093854811433539
h2020a	H?®egmark S, Andersen TE, Grahn P, Roessler KK.	2020	The Wildman Programme. A Nature-Based Rehabilitation Programme Enhancing Quality of Life for Men on Long-Term Sick Leave: Study Protocol for a Matched Controlled Study In Denmark	n	n	n	n	n	n	n	y	n		10.1080/10428232.2017.1399036
ha2017	Ha H.	2017	Geographic Variation in Mentally Unhealthy Days: Air Pollution and Altitude Perspectives	n	n	n	n	n	n	n	y	n		10.1371/journal.pone.0147025
ha2019	Ha H, Shao W.	2019	A spatial epidemiology case study of mentally unhealthy days (MUDs): air pollution, community resilience, and sunlight perspectives	n	n	n	n	n	n	n	y	n		10.1176/ps.2010.61.10.1000
hackett2017	Hackett, Christina L.; Jung, Young; Mulvale, Gillian; Mills, Laura; Dowie, Vaughn	2017	Evaluating the Effectiveness and Social Return on Investment of the Pine River Institute: An Intensive Mental Health and Addiction Program for Young People	n	n	n	n	n	n	n	y	n		10.1007/s10826-016-0577-4
haddara2019	Haddara N, Ravid J, Miller EL, O'Hagan M, Caracciolo C, Miskovic V.	2019	Anxious anticipation prolongs emotional interference for rapid visual detection	n	n	n	n	n	n	n	y	n		10.1111/pedi.12996
hadjipavlou2015	Hadjipavlou G, Hernandez CA, Ogrodniczuk JS.	2015	Psychotherapy in Contemporary Psychiatric Practice	n	n	n	n	n	n	n	y	n		x
haffejee2015	Haffejee, Badiah	2015	African Refugee Youths' Stories of Surviving Trauma and Transition in U.S. Public Schools	n	n	n	n	n	n	n	y	n		10.1177/070674371405901105
haggett2015	Haggett A.	2015	A History of Male Psychological Disorders in Britain, 1945ÈÃ¶1980	n	n	n	n	n	n	n	y	n		10.1007/s11524-009-9407-y
hahad2020	Hahad O, Beutel ME, Gilan DA, Michal M, Daiber A, M??nzel T.	2020	[Impact of environmental risk factors such as noise and air pollution on mental health: What do we know?]	n	n	n	n	n	n	n	y	n		10.1007/s13187-020-01786-2
haines2020	Haines-Delmont A, Chahal G, Bruen AJ, Wall A, Khan CT, Sadashiv R, Fearnley D.	2020	Testing Suicide Risk Prediction Algorithms Using Phone Measurements With Patients in Acute Mental Health Settings: Feasibility Study	n	n	n	n	n	n	n	y	n		10.1177/0163278715619738
hakim2018	Hakim, Reza; Hakimi, Ehsan	2018	Rumi's cognitive therapy approach to health and disease	n	n	n	n	n	n	n	y	n		10.3389/fpsyg.2018.02617
hall2016	Hall G, Jessup J, Lim S, Olson D, Seligson AL, He FT, De La Cruz N, Gwynn C.	2016	Spatial Shift in the Utilization of Mental Health Services After Hurricane Sandy Among New York City Residents Enrolled in Medicaid	n	n	n	n	n	n	n	y	n		10.3390/ijerph16214227
hall2019a	Hall BJ, Garabiles MR, de Hoop J, Pereira A, Prencipe L, Palermo TM.	2019	Perspectives of adolescent and young adults on poverty-related stressors: a qualitative study in Ghana, Malawi and Tanzania	n	n	n	n	n	n	n	y	n		10.1016/j.ypmed.2016.09.030
hall2020	Hall NL, Crosby L.	2020	Climate Change Impacts on Health in Remote Indigenous Communities in Australia	n	n	n	n	n	n	n	y	n		10.4269/ajtmh.17-0578
halmer2015	Halmer TC, Beall RC, Shah AA, Dark C.	2015	Health Policy Considerations in Treating Mental and Behavioral Health Emergencies in the United States	n	n	n	n	n	n	n	y	n		10.1097/HRP.0000000000000171
hammersen2016	Hammersen F, Niemann H, Hoebel J.	2016	Environmental Noise Annoyance and Mental Health in Adults: Findings from the Cross-Sectional German Health Update (GEDA) Study 2012	n	n	n	n	n	n	n	y	n		10.1037/a0036228
han2018	Han, Yafang	2018	Study on the Landscape Design of Urban Aged Community Based on Humanistic Care	n	n	n	n	n	n	n	y	n		10.1177/0706743719828977
han2018a	Han HJ, Kim JH, Chung SE, Park JH, Cheong HK.	2018	Estimation of the National Burden of Disease and Vulnerable Population Associated with Natural Disasters in Korea: Heavy Precipitation and Typhoon	n	n	n	n	n	n	n	y	n		10.2174/2210315507666170616082903
han2020	Han, Heesup; Yu, Jongsik; Hyun, Sunghyup Sean	2020	Effects of nature-based solutions (NBS) on eco-friendly hotel guests' mental health perceptions, satisfaction, switching barriers, and revisit intentions	n	n	n	n	n	n	n	y	n		10.1016/j.schres.2018.03.026
hanigan2012	Hanigan IC, Butler CD, Kokic PN, Hutchinson MF.	2012	Suicide and drought in New South Wales, Australia, 1970-2007	n	n	n	n	n	n	n	y	n		10.1017/S0954579413000801
hanigan2018	Hanigan IC, Schirmer J, Niyonsenga T.	2018	Drought and Distress in Southeastern Australia	n	n	n	n	n	n	n	y	n		10.1177/2167702613501496
hankey2017	Hankey S, Marshall JD.	2017	Urban Form, Air Pollution, and Health	n	n	n	n	n	n	n	y	n		10.1080/20008198.2018.1500823
hanrahan2019	Hanrahan, Maura; Mercer, Nicholas	2019	Gender and water insecurity in a subarctic Indigenous community	n	n	n	n	n	n	n	y	n		10.3390/ijerph15061072
haroz2020	Haroz EE, Walsh CG, Goklish N, Cwik MF, O'Keefe V, Barlow A.	2020	Reaching Those at Highest Risk for Suicide: Development of a Model Using Machine Learning Methods for use With Native American Communities	n	n	n	n	n	n	n	y	n		10.1080/13504622.2013.862613
harper2015	Harper SL, Edge VL, Ford J, Willox AC, Wood M; IHACC Research Team; RICG, McEwen SA.	2015	Climate-sensitive health priorities in Nunatsiavut, Canada	n	n	n	n	n	n	n	y	n		10.4103/IJPSYM.IJPSYM_571_17
harper2019	Harper, N. J.; Mott, A. J.; Obee, P.	2019	Client perspectives on wilderness therapy as a component of adolescent residential treatment for problematic substance use and mental health issues	n	n	n	n	n	n	n	y	n		x
harris2015	Harris MH, Gold DR, Rifas-Shiman SL, Melly SJ, Zanobetti A, Coull BA, Schwartz JD, Gryparis A, Kloog I, Koutrakis P, Bellinger DC, White RF, Sagiv SK, Oken E.	2015	Prenatal and Childhood Traffic-Related Pollution Exposure and Childhood Cognition in the Project Viva Cohort (Massachusetts, USA)	n	n	n	n	n	n	n	y	n		10.1096/fj.14-268037
hart2011	Hart CR, Berry HL, Tonna AM.	2011	Improving the mental health of rural New South Wales communities facing drought and other adversities	n	n	n	n	n	n	n	y	n		10.1016/j.tem.2020.01.007
harville2015	Harville EW, Jacobs M, Boynton-Jarrett R.	2015	When is exposure to a natural disaster traumatic? Comparison of a trauma questionnaire and disaster exposure inventory	n	n	n	n	n	n	n	y	n		10.7196/samjnew.8421
hashoul2016	Hashoul-Andary, Raneen; Assayag-Nitzan, Yaara; Yuval, Kim; Aderka, Idan M.; Litz, Brett; Bernstein, Amit	2016	A Longitudinal Study of Emotional Distress Intolerance and Psychopathology Following Exposure to a Potentially Traumatic Event in a Community Sample	n	n	n	n	n	n	n	y	n		10.1177/070674371506000402
hassan2018	Hassan A, Tao J, Li G, Jiang M, Aii L, Zhihui J, Zongfang L, Qibing C.	2018	Effects of Walking in Bamboo Forest and City Environments on Brainwave Activity in Young Adults	n	n	n	n	n	n	n	y	n		10.3389/fnsyn.2010.00024
hassan2018a	Hassan FU, Singh G, Sekar K.	2018	Children's Reactions to Flood Disaster in Kashmir	n	n	n	n	n	n	n	y	n		10.3233/JAD-190713
hasson2016	Hasson-Ohayon I, Roe D, Yanos PT, Lysaker PH.	2016	The trees and the forest: mixed methods in the assessment of recovery based interventions' processes and outcomes in mental health	n	n	n	n	n	n	n	y	n		10.3238/arztebl.2017.0121
haswell2016	Haswell MR, Bethmont A.	2016	Health concerns associated with unconventional gas mining in rural Australia	n	n	n	n	n	n	n	y	n		x
hayashi2010	Hayashi, Mayumi	2010	Citizen Education Programs at Awaji Landscape Planning & Horticulture Academy for the Improvement of the Landscape and the Environment	n	n	n	n	n	n	n	y	n		10.1007/s10916-019-1486-z
hayashi2020	Hayashi K, Gonzales TK, Kapoor A, Ziegler TE, Meethal SV, Atwood CS.	2020	Development of Classification Models for the Prediction of Alzheimer's Disease Utilizing Circulating Sex Hormone Ratios	n	n	n	n	n	n	n	y	n		10.1002/cpe.5550
hayes2018	Hayes K, Blashki G, Wiseman J, Burke S, Reifels L.	2018	Climate change and mental health: risks, impacts and priority actions	n	n	n	n	n	n	n	y	n		x
hayes2018a	Hayes K, Poland B.	2018	Addressing Mental Health in a Changing Climate: Incorporating Mental Health Indicators into Climate Change and Health Vulnerability and Adaptation Assessments	n	n	n	n	n	n	n	y	n		10.1038/s41598-020-62713-5
hayes2019	Hayes K, Berry P, Ebi KL.	2019	Factors Influencing the Mental Health Consequences of Climate Change in Canada	n	n	n	n	n	n	n	y	n		10.1111/acps.13029
hayes2020	Hayes K, Poland B, Cole DC, Agic B.	2020	Psychosocial adaptation to climate change in High River, Alberta: implications for policy and practice	n	n	n	n	n	n	n	y	n		10.3109/11038120903045366
hays2019	Hays R, Henson P, Wisniewski H, Hendel V, Vaidyam A, Torous J.	2019	Assessing Cognition Outside of the Clinic: Smartphones and Sensors for Cognitive Assessment Across Diverse Psychiatric Disorders	n	n	n	n	n	n	n	y	n		10.1016/j.childyouth.2019.104450
hayward2018	Hayward, R. Anna; Joseph, Debra D.	2018	Social Work Perspectives on Climate Change and Vulnerable Populations in the Caribbean: Environmental Justice and Health	n	n	n	n	n	n	n	y	n		x
hayward2020	Hayward BA.	2020	Mental health nursing in bushfire-affected communities: An autoethnographic insight	n	n	n	n	n	n	n	y	n		10.1016/j.janxdis.2020.102263
he2016	He FT, Lundy De La Cruz N, Olson D, Lim S, Levanon Seligson A, Hall G, Jessup J, Gwynn C.	2016	Temporal and Spatial Patterns in Utilization of Mental Health Services During and After Hurricane Sandy: Emergency Department and Inpatient Hospitalizations in New York City	n	n	n	n	n	n	n	y	n		10.3390/children1020099
he2019	He S, Smargiassi A, Low N, Bilodeau-Bertrand M, Ayoub A, Auger N.	2019	Residential noise exposure and the longitudinal risk of hospitalization for depression after pregnancy: Postpartum and beyond	n	n	n	n	n	n	n	y	n		10.3390/children2040412
he2020	He G, Chen Y, Wang S, Dong Y, Ju G, Chen B.	2020	The Association Between PM(2.5) and Depression in China	n	n	n	n	n	n	n	y	n		10.1146/annurev-publhealth-031816-044232
heaney2016	Heaney AK, Winter SJ.	2016	Climate-driven migration: an exploratory case study of Maasai health perceptions and help-seeking behaviors	n	n	n	n	n	n	n	y	n		10.1007/978-3-319-50094-2_4
heaslip2020	Heaslip, Vanessa; Vahdaninia, Mariam; Hind, Martin; Darvill, Tim; Staelens, Yvette; O'Donoghue, Daniel; Drysdale, Laura; Lunt, Sara; Hogg, Chris; Allfrey, Martin; Clifton, Briony; Sutcliffe, Toby	2020	Locating oneself in the past to influence the present: Impacts of Neolithic landscapes on mental health well-being	n	n	n	n	n	n	n	y	n		10.1177/1010539510392556
helbich2018	Helbich M, de Beurs D, Kwan MP, O'Connor RC, Groenewegen PP.	2018	Natural environments and suicide mortality in the Netherlands: a cross-sectional, ecological study	n	n	n	n	n	n	n	y	n		10.1016/j.aogh.2015.06.004
helbich2019	Helbich M.	2019	Dynamic Urban Environmental Exposures on Depression and Suicide (NEEDS) in the Netherlands: a protocol for a cross-sectional smartphone tracking study and a longitudinal population register study	n	n	n	n	n	n	n	y	n		10.3402/gha.v4i0.8445
helbich2020	Helbich M, O'Connor RC, Nieuwenhuijsen M, Hagedoorn P.	2020	Greenery exposure and suicide mortality later in life: A longitudinal register-based case-control study	n	n	n	n	n	n	n	y	n		10.1007/s40201-020-00462-3
helbich2020a	Helbich M, Browning MHEM, Huss A.	2020	Outdoor light at night, air pollution and depressive symptoms: A cross-sectional study in the Netherlands	n	n	n	n	n	n	n	y	n		x
helm2018	Helm, Sabrina V.; Pollitt, Amanda; Barnett, Melissa A.; Curran, Melissa A.; Craig, Zelieann R.	2018	Differentiating environmental concern in the context of psychological adaption to climate change	n	n	n	n	n	n	n	y	n		10.1097/01.NAJ.0000515232.51795.fa
hemingway2019	Hemingway A, Carter S, Callaway A, Kavanagh E, Ellis S.	2019	An Exploration of the Mechanism of Action of an Equine-Assisted Intervention	n	n	n	n	n	n	n	y	n		10.1007/s00038-009-0112-0
henckes2019	Henckes N.	2019	Schizophrenia Infrastructures: Local and Global Dynamics of Transformation in Psychiatric Diagnosis-Making in the Twentieth and Twenty-First Centuries	n	n	n	n	n	n	n	y	n		10.1007/s10584-013-0875-4
hendrikx2018	Hendrikx RJP, Drewes HW, Spreeuwenberg M, Ruwaard D, Baan CA.	2018	Comparing the Health of Populations: Methods to Evaluate and Tailor Population Management Initiatives in the Netherlands	n	n	n	n	n	n	n	y	n		10.3928/02793695-20200624-05
herrick2020	Herrick C.	2020	The optics of noncommunicable diseases: from lifestyle to environmental toxicity	n	n	n	n	n	n	n	y	n		10.1016/j.ajp.2015.12.011
hess2014	Hess, Julia M.; Isakson, Brian; Githinji, Ann; Roche, Natalie; Vadnais, Kathryn; Parker, Danielle P.; Goodkind, Jessica R.	2014	Reducing Mental Health Disparities Through Transformative Learning: A Social Change Model With Refugees and Students	n	n	n	n	n	n	n	y	n		10.1186/s13033-018-0210-6
hetherington2018	Hetherington E, McDonald S, Wu M, Tough S.	2018	Risk and Protective Factors for Mental Health and Community Cohesion After the 2013 Calgary Flood	n	n	n	n	n	n	n	y	n		10.1177/0004867415615946
heyman2010	Heyman, Bob	2010	Screening for health risks: A second editorial	n	n	n	n	n	n	n	y	n		10.1097/NMD.0000000000001162
higuchi2017	Higuchi, Masakazu; Shinohara, Shuji; Nakamura, Mitsuteru; Mitsuyoshi, Shunji; Tokuno, Shinichi; Omiya, Yasuhiro; Hagiwara, Naoki; Takano, Takeshi	2017	An Effect of Noise on Mental Health Indicator using Voice	n	n	n	n	n	n	n	y	n		10.1071/PY10025
hijar2016	Hijar G, Bonilla C, Munayco CV, Gutierrez EL, Ramos W.	2016	[El ni??o phenomenon and natural disasters: public health interventions for disaster preparedness and response]	n	n	n	n	n	n	n	y	n		10.1016/j.pop.2016.09.017
hildebrandt2019	Hildebrandt, Sophia; Kubota, Tetsu; Sani, Hanief Ariefman; Surahman, Usep	2019	Indoor Air Quality and Health in Newly Constructed Apartments in Developing Countries: A Case Study of Surabaya, Indonesia	n	n	n	n	n	n	n	y	n		10.1016/j.cpha.2018.08.008
hill2014	Hill EM, Billington R, Kr?±geloh C.	2014	Noise sensitivity and diminished health: testing moderators and mediators of the relationship	n	n	n	n	n	n	n	y	n		10.1080/09603123.2020.1777948
hipp2011	Hipp, J. Aaron; Ogunseitan, Oladele A.	2011	Effect of environmental conditions on perceived psychological restorativeness of coastal parks	n	n	n	n	n	n	n	y	n		10.1016/j.socscimed.2017.01.009
hirsch2018	Hirsch, Jameson K.; Smalley, K. Bryant; Selby-Nelson, Emily M.; Hamel-Lambert, Jane M.; Rosmann, Michael R.; Barnes, Tammy A.; Abrahamson, Daniel; Meit, Scott S.; GreyWolf, Iva; Beckmann, Sarah; LaFromboise, Teresa	2018	Psychosocial Impact of Fracking: a Review of the Literature on the Mental Health Consequences of Hydraulic Fracturing	n	n	n	n	n	n	n	y	n		10.3402/gha.v6i0.20816
ho2018	Ho, Hilda; Fergus, Karen; Perry, Adrienne	2018	Looking back and moving forward: The experiences of canadian parents raising an adolescent with autism spectrum disorder	n	n	n	n	n	n	n	y	n		10.1089/env.2019.0034
hoare2019	Hoare E, Jacka F, Berk M.	2019	The impact of urbanization on mood disorders: an update of recent evidence	n	n	n	n	n	n	n	y	n		10.3390/ijerph120708359
hoisington2019	Hoisington, Andrew J.; Stearns-Yoder, Kelly A.; Schuldt, Steven J.; Beemer, Cody J.; Maestre, Juan P.; Kinney, Kerry A.; Postolache, Teodor T.; Lowry, Christopher A.; Brenner, Lisa A.	2019	Ten questions concerning the built environment and mental health	n	n	n	n	n	n	n	y	n		10.2471/BLT.15.167031
hooyberg2020	Hooyberg A, Roose H, Grellier J, Elliott LR, Lonneville B, White MP, Michels N, De Henauw S, Vandegehuchte M, Everaert G.	2020	General health and residential proximity to the coast in Belgium: Results from a cross-sectional health survey	n	n	n	n	n	n	n	y	n		10.1016/j.aogh.2015.08.008
horgan2016	Horgan CM, Stewart MT, Reif S, Garnick DW, Hodgkin D, Merrick EL, Quinn AE.	2016	Behavioral Health Services in the Changing Landscape of Private Health Plans	n	n	n	n	n	n	n	y	n		10.1146/annurev-publhealth-071910-140612
hossain2010	Hossain D, Gorman D, Eley R, Coutts J.	2010	Value of mental health first aid training of advisory and extension agents in supporting farmers in rural Queensland	n	n	n	n	n	n	n	y	n		10.2105/AJPH.2017.304047
howat2011	Howat P, Stoneham M.	2011	Why sustainable population growth is a key to climate change and public health equity	n	n	n	n	n	n	n	y	n		10.1001/jama.2014.13186
hsieh2015	Hsieh HL, Lin HJ, Shih SS, Chen CP.	2015	Ecosystem Functions Connecting Contributions from Ecosystem Services to Human Wellbeing in a Mangrove System in Northern Taiwan	n	n	n	n	n	n	n	y	n		10.1111/j.1365-2796.2011.02415.x
hu2015	Hu S, Tan H, Cofie R, Zhou J, Yang T, Tang X, Liu A.	2015	Recovery from post-traumatic stress disorder after a flood in China: a 13-year follow-up and its prediction by degree of collective action	n	n	n	n	n	n	n	y	n		x
hu2015a	Hu, Xuan	2015	Research on Urban Light Pollution and Its Prevention	n	n	n	n	n	n	n	y	n		10.3109/09540261.2014.925851
hubbard2018	Hubbard RE, Bak M, Watts J, Shum D, Lynch A, Peel NM.	2018	Enhancing Dignity for Older Inpatients: The Photograph-Next-to-the-Bed Study	n	n	n	n	n	n	n	y	n		10.1177/0031721720917541
hughes2020	Hughes J, De Ruyck C, Emmens T, Bradbury RB, Jefferson R.	2020	In a mental-health care setting, can nature conservation and health priorities align?	n	n	n	n	n	n	n	y	n		10.1111/jnu.12328
hungerford2011	Hungerford, C.	2011	Changing landscapes: A partnership between mental health nurses and the Psychotherapy and Counselling Federation of Australia Inc. (PACFA)	n	n	n	n	n	n	n	y	n		x
hunter2012	Hunter JC, Crawley AW, Petrie M, Yang JE, Arag??n TJ.	2012	Local Public Health System Response to the Tsunami Threat in Coastal California following the T?ýhoku Earthquake	n	n	n	n	n	n	n	y	n		10.1007/s10653-018-0235-4
husain2016	Husain, Wahidah; Xin, Lee Ker; Rashid, Nur'Aini Abdul; Jothi, Neesha	2016	Predicting Generalized Anxiety Disorder Among Women Using Random Forest Approach	n	n	n	n	n	n	n	y	n		10.1007/s00038-015-0759-7
hyshka2017	Hyshka E, Anderson JT, Wild TC.	2017	Perceived unmet need and barriers to care amongst street-involved people who use illicit drugs	n	n	n	n	n	n	n	y	n		10.1186/s12889-015-1874-3
idris2018	Idris, Idayu Badilla; Puteh, Sharifa Ezat Wan; Hod, Rozita; Nawi, Azmawati Mohammed; Ahmad, Izzah Syazwani; Siwar, Chamhuri; Taha, Mohd Raihan	2018	MENTAL HEALTH DISORDER AMONG POST FLOOD VICTIMS IN PAHANG	n	n	n	n	n	n	n	y	n		10.3389/fpsyt.2020.00125
ieichalopoulos2016	Ieichalopoulos, Charalampos; Tzavara, Chara; Liodakis, Stylianos	2016	Intensive hog farming operations, health risks, and quality of life of nearby residents in east Mediterranean	n	n	n	n	n	n	n	y	n		10.1146/annurev-clinpsy-032814-112720
iemmi2019	Iemmi V.	2019	Sustainable development for global mental health: a typology and systematic evidence mapping of external actors in low-income and middle-income countries	n	n	n	n	n	n	n	y	n		10.1002/pmh.1429
igarashi2015	Igarashi M, Song C, Ikei H, Miyazaki Y.	2015	Effect of stimulation by foliage plant display images on prefrontal cortex activity: a comparison with stimulation using actual foliage plants	n	n	n	n	n	n	n	y	n		x
imbimbo2020	Imbimbo BP, Lozupone M, Watling M, Panza F.	2020	Discontinued disease-modifying therapies for Alzheimer's disease: status and future perspectives	n	n	n	n	n	n	n	y	n		10.1186/s40035-019-0171-y
ingle2020	Ingle HE, Mikulewicz M.	2020	Mental health and climate change: tackling invisible injustice	n	n	n	n	n	n	n	y	n		10.1093/jhmas/jrz027
ishiki2016	Ishiki A, Okinaga S, Tomita N, Kawahara R, Tsuji I, Nagatomi R, Taki Y, Takahashi T, Kuzuya M, Morimoto S, Iijima K, Koseki T, Arai H, Furukawa K.	2016	Changes in Cognitive Functions in the Elderly Living in Temporary Housing after the Great East Japan Earthquake	n	n	n	n	n	n	n	y	n		10.1016/j.scitotenv.2018.12.221
ising2012	Ising HK, Veling W, Loewy RL, Rietveld MW, Rietdijk J, Dragt S, Klaassen RM, Nieman DH, Wunderink L, Linszen DH, van der Gaag M.	2012	The validity of the 16-item version of the Prodromal Questionnaire (PQ-16) to screen for ultra high risk of developing psychosis in the general help-seeking population	n	n	n	n	n	n	n	y	n		10.1097/WTF.0000000000000153
iskander2018	Iskander J, McLanahan E, Thomas JD, Henry JB, Byrne D, Williams H.	2018	Public Health Emergency Response Lessons Learned by Rapid Deployment Force 3, 2006-2016	n	n	n	n	n	n	n	y	n		10.1093/ije/dyz219
jaakkola2018	Jaakkola JJK, Juntunen S, N?±kk?±l?±j?±rvi K.	2018	The Holistic Effects of Climate Change on the Culture, Well-Being, and Health of the Saami, the Only Indigenous People in the European Union	n	n	n	n	n	n	n	y	n		10.1016/j.healthplace.2018.09.002
jack2013	Jack-Ide, Izibeloko O.; Uys, Leana R.; Middleton, Lyn E.	2013	Caregiving experiences of families of persons with serious mental health problems in the Niger Delta region of Nigeria	n	n	n	n	n	n	n	y	n		10.1016/j.healthplace.2019.102200
jacobs2018a	Jacobs R, Chalkley M, Arag??n MJ, B?┬hnke JR, Clark M, Moran V.	2018	Funding approaches for mental health services: Is there still a role for clustering?	n	n	n	n	n	n	n	y	n		10.1016/j.healthplace.2013.05.006
jacobsen2020	Jacobsen E, Ran X, Liu A, Chang CH, Ganguli M.	2020	Predictors of attrition in a longitudinal population-based study of aging	n	n	n	n	n	n	n	y	n		10.1186/s12966-015-0188-2
jadhav2012	Jadhav S, Barua M.	2012	The Elephant Vanishes: impact of human-elephant conflict on people's wellbeing	n	n	n	n	n	n	n	y	n		10.1371/journal.pcbi.1007380
james2016	James P, Hart JE, Banay RF, Laden F.	2016	Exposure to Greenness and Mortality in a Nationwide Prospective Cohort Study of Women	n	n	n	n	n	n	n	y	n		10.1016/j.jpeds.2014.03.030
james2020	James LE, Welton-Mitchell C, Noel JR, James AS.	2020	Integrating mental health and disaster preparedness in intervention: a randomized controlled trial with earthquake and flood-affected communities in Haiti	n	n	n	n	n	n	n	y	n		10.1136/jnnp-2018-319008
janssen2017	Janssen, Bernd; Schaefer, Bernd	2017	Galantamine	n	n	n	n	n	n	n	y	n		10.1192/bjp.2019.3
jarosi2018	Jarosi?õska D, H?«roux M?Û, Wilkhu P, Creswick J, Verbeek J, Wothge J, Paunovi?þ E.	2018	Development of the WHO Environmental Noise Guidelines for the European Region: An Introduction	n	n	n	n	n	n	n	y	n		10.1016/j.psychres.2017.11.043
jarvis2020	Jarvis I, Koehoorn M, Gergel SE, van den Bosch M.	2020	Different types of urban natural environments influence various dimensions of self-reported health	n	n	n	n	n	n	n	y	n		x
jedrychowski2011	Jedrychowski W, Maugeri U, Perera F, Stigter L, Jankowski J, Butscher M, Mroz E, Flak E, Skarupa A, Sowa A.	2011	Cognitive function of 6-year old children exposed to mold-contaminated homes in early postnatal period. Prospective birth cohort study in Poland	n	n	n	n	n	n	n	y	n		10.1016/j.psfr.2015.05.004
jenkins2015	Jenkins R, Othieno C, Ongeri L, Ogutu B, Sifuna P, Mboroki J, Omollo R.	2015	Attention deficit hyperactivity disorder symptom self-report in adults in Kenya and its associated risk factors, an analysis from a household survey in a demographic surveillance site	n	n	n	n	n	n	n	y	n		10.1016/j.physbeh.2011.06.019
jensen2018	Jensen HAR, Rasmussen B, Ekholm O.	2018	Neighbour and traffic noise annoyance: a nationwide study of associated mental health and perceived stress	n	n	n	n	n	n	n	y	n		10.1016/j.envint.2017.03.019
jensen2019	Jensen HAR, Rasmussen B, Ekholm O.	2019	Neighbour noise annoyance is associated with various mental and physical health symptoms: results from a nationwide study among individuals living in multi-storey housing	n	n	n	n	n	n	n	y	n		10.1111/jopy.12531
jernigan2018	Jernigan TL, Brown SA; ABCD Consortium Coordinators.	2018	Introduction	n	n	n	n	n	n	n	y	n		10.1038/nature25503
jeurissen2016	Jeurissen PP, Ravesteijn BA, Janssen RT, Tanke MA.	2016	[Towards a sustainable, cost-effective mental health care; a policy perspective]	n	n	n	n	n	n	n	y	n		10.1097/MAO.0000000000001936
jevtic2017	Jevtic, M.	2017	Mental Health & the role of mindset in Climate Change issues	n	n	n	n	n	n	n	y	n		10.1001/jamaneurol.2014.3978
ji2019	Ji JS, Zhu A, Bai C, Wu CD, Yan L, Tang S, Zeng Y, James P.	2019	Residential greenness and mortality in oldest-old women and men in China: a longitudinal cohort study	n	n	n	n	n	n	n	y	n		10.1111/fcre.12133
jiang2020a	Jiang X, Larsen L, Sullivan W.	2020	Connections-between Daily Greenness Exposure and Health Outcomes	n	n	n	n	n	n	n	y	n		10.1186/2193-1801-2-300
jiao2017	Jiao B, Zafari Z, Will B, Ruggeri K, Li S, Muennig P.	2017	The Cost-Effectiveness of Lowering Permissible Noise Levels Around U.S. Airports	n	n	n	n	n	n	n	y	n		10.1080/22423982.2019.1608084
joensuu2010	Joensuu M, V?±?±n?±nen A, Koskinen A, Kivim?±ki M, Virtanen M, Vahtera J.	2010	Psychosocial work environment and hospital admissions due to mental disorders: a 15-year prospective study of industrial employees	n	n	n	n	n	n	n	y	n		10.1108/JFP-10-2014-0034
johal2016	Johal, Sarb; Mounsey, Zoe	2016	A research-based primer on the potential psychosocial impacts of flooding	n	n	n	n	n	n	n	y	n		10.1177/1359104517744246
johnson2017	Johnson, Emmanuel Janagan; Boodram, Cheryl-Ann Sarita	2017	Health, well-being and quality of life of community members displaced after an industrial disaster in Trinidad	n	n	n	n	n	n	n	y	n		10.3389/fpsyg.2014.01518
johnson2018	Johnson BS, Malecki KM, Peppard PE, Beyer KMM.	2018	Exposure to neighborhood green space and sleep: evidence from the Survey of the Health of Wisconsin	n	n	n	n	n	n	n	y	n		10.1177/0308022619865223
johnson2020a	Johnson AL, Gao CX, Dennekamp M, Williamson GJ, Carroll MTC, Dimitriadis C, Dipnall JF, Ikin JF, Johnston FH, McFarlane AC, Sim MR, Stub DA, Abramson MJ, Guo Y.	2020	Coal-mine fire-related fine particulate matter and medical-service utilization in Australia: a time-series analysis from the Hazelwood Health Study	n	n	n	n	n	n	n	y	n		10.1016/j.neuroimage.2019.01.053
jones2012	Jones MK, Wootton BM, Vaccaro LD, Menzies RG.	2012	The impact of climate change on obsessive compulsive checking concerns	n	n	n	n	n	n	n	y	n		10.1080/13569783.2013.836920
jones2017	Jones, Gavin	2017	To a God Unknown: Drought, Climate, and Race in the West	n	n	n	n	n	n	n	y	n		10.1016/j.landurbplan.2017.12.006
jorcano2019	Jorcano A, Lubczy?õska MJ, Pierotti L, Altug H, Ballester F, Cesaroni G, El Marroun H, Fern?Ýndez-Somoano A, Freire C, Hanke W, Hoek G, Ibarluzea J, I??iguez C, Jansen PW, Lepeule J, Markevych I, Pola?õska K, Porta D, Schikowski T, Slama R, Standl M, Tardon A, Vrijkotte TGM, von Berg A, Tiemeier H, Sunyer J, Guxens M.	2019	Prenatal and postnatal exposure to air pollution and emotional and aggressive symptoms in children from 8 European birth cohorts	n	n	n	n	n	n	n	y	n		10.24095/hpcdp.39.4.03
joseph2017	Joseph R, Kester R, O'Brien C, Huang H.	2017	The Evolving Practice of Psychiatry in the Era of Integrated Care	n	n	n	n	n	n	n	y	n		10.1016/j.urolonc.2014.01.009
jung2019	Jung M, Cho D, Shin K.	2019	The Impact of Particulate Matter on Outdoor Activity and Mental Health: A Matching Approach	n	n	n	n	n	n	n	y	n		10.1016/j.urolonc.2013.07.020
kageyama2016	Kageyama T, Yano T, Kuwano S, Sueoka S, Tachibana H.	2016	Exposure-response relationship of wind turbine noise with self-reported symptoms of sleep and health problems: A nationwide socioacoustic survey in Japan	n	n	n	n	n	n	n	y	n		10.3389/fpsyg.2017.00078
kalogeropoulos2018	Kalogeropoulos, Christopher; Roquet, Catherine; Sztopa, Veronika; Bradley, Stacy; Drapeau, Martin	2018	Psychologists and Psychotherapists' Practices of Psychotherapy in Quebec: What Differences Exist?	n	n	n	n	n	n	n	y	n		10.1111/jcpp.12388
kameg2020	Kameg BN.	2020	Climate Change and Mental Health: Implications for Nurses	n	n	n	n	n	n	n	y	n		10.1162/ASEP_a_00697
kamimura2017	Kamimura A, Armenta B, Nourian M, Assasnik N, Nourian K, Chernenko A.	2017	Perceived Environmental Pollution and Its Impact on Health in China, Japan, and South Korea	n	n	n	n	n	n	n	y	n		10.1162/ASEP_a_00698
kanalas2014	Kanalas, G.; Micu-Serbu, I. B.; Gulyas, V.; Ranta, M.; Nussbaum, L.; Nyiredi, A.; Jurma, A.; Rozinbaum, G. I.	2014	Resilience in children originated from families in which parents migrate due to labor conditions	n	n	n	n	n	n	n	y	n		10.2174/1570159x13666160512150918
kang2019	Kang, Tae Soo	2019	Comments on Early Life Exposure to Air Pollution,Cognitive Development, and Labor Market Outcome	n	n	n	n	n	n	n	y	n		10.1371/journal.pntd.0002579
kannuri2018	Kannuri, Nanda Kishore; Jadhav, Sushrut	2018	Generating toxic landscapes: impact on well-being of cotton farmers in Telangana, India	n	n	n	n	n	n	n	y	n		10.1017/S1049023X12001380
kanwar2015	Kanwar A.	2015	Mental Illness and Stigma: Has Psychiatry Done more Harm than Good?	n	n	n	n	n	n	n	y	n		10.1177/0002764211409384
kaplan2015	Kaplan BJ, Rucklidge JJ, Romijn AR, Dolph M.	2015	A randomised trial of nutrient supplements to minimise psychological stress after a natural disaster	n	n	n	n	n	n	n	y	n		10.1177/0020764020924690
kar2010	Kar N.	2010	Indian research on disaster and mental health	n	n	n	n	n	n	n	y	n		10.1016/j.socscimed.2018.08.019
karafin2018	Karafin MS, Singavi A, Hussain J, Wandersee N, Heinrich T, Hurley RW, Zhang L, Simpson P, Field JJ.	2018	Predictive factors of daily opioid use and quality of life in adults with sickle cell disease	n	n	n	n	n	n	n	y	n		10.1080/13607863.2010.501053
karasch2020	Karasch O, Schmitz-Buhl M, Mennicken R, Zielasek J, Gouzoulis-Mayfrank E.	2020	Identification of risk factors for involuntary psychiatric hospitalization: using environmental socioeconomic data and methods of machine learning to improve prediction	n	n	n	n	n	n	n	y	n		10.1017/gmh.2017.33
karaye2020	Karaye IM, Ross AD, Horney JA.	2020	Self-Rated Mental and Physical Health of U.S. Gulf Coast Residents	n	n	n	n	n	n	n	y	n		10.2196/10000
karceski2020	Karceski, Steven	2020	Air pollution and brain health	n	n	n	n	n	n	n	y	n		x
kardan2015	Kardan O, Gozdyra P, Misic B, Moola F, Palmer LJ, Paus T, Berman MG.	2015	Neighborhood greenspace and health in a large urban center	n	n	n	n	n	n	n	y	n		10.1371/journal.pone.0219134
karjalainen2010	Karjalainen E, Sarjala T, Raitio H.	2010	Promoting human health through forests: overview and major challenges	n	n	n	n	n	n	n	y	n		x
karmegam2020	Karmegam D, Mappillairaju B.	2020	Spatio-temporal distribution of negative emotions on Twitter during floods in Chennai, India, in 2015: a post hoc analysis	n	n	n	n	n	n	n	y	n		10.1016/j.neuroimage.2018.12.040
kasthurirathne2018	Kasthurirathne SN, Vest JR, Menachemi N, Halverson PK, Grannis SJ.	2018	Assessing the capacity of social determinants of health data to augment predictive models identifying patients in need of wraparound social services	n	n	n	n	n	n	n	y	n		10.1111/j.1365-2524.2011.01044.x
kasthurirathne2019	Kasthurirathne SN, Biondich PG, Grannis SJ, Purkayastha S, Vest JR, Jones JF.	2019	Identification of Patients in Need of Advanced Care for Depression Using Data Extracted From a Statewide Health Information Exchange: A Machine Learning Approach	n	n	n	n	n	n	n	y	n		10.1089/pop.2017.0101
kaur2019	Kaur, Pavleen; Kumar, Ravinder; Kumar, Munish	2019	A healthcare monitoring system using random forest and internet of things (IoT)	n	n	n	n	n	n	n	y	n		10.1007/s11205-011-9849-y
kawa2012	Kawa S, Giordano J.	2012	A brief historicity of the Diagnostic and Statistical Manual of Mental Disorders: issues and implications for the future of psychiatric canon and practice	n	n	n	n	n	n	n	y	n		10.1093/swr/svx009
keeler2019	Keeler, Bonnie L.; Hamel, Perrine; McPhearson, Timon; Hamann, Maike H.; Donahue, Marie L.; Prado, Kelly A. Meza; Arkema, Katie K.; Bratman, Gregory N.; Brauman, Kate A.; Finlay, Jacques C.; Guerry, Anne D.; Hobbie, Sarah E.; Johnson, Justin A.; MacDonald, Graham K.; McDonald, Robert, I; Neverisky, Nick; Wood, Spencer A.	2019	Social-ecological and technological factors moderate the value of urban nature	n	n	n	n	n	n	n	y	n		10.3390/diagnostics10030162
kelly2011	Kelly BJ, Lewin TJ, Stain HJ, Coleman C, Fitzgerald M, Perkins D, Carr VJ, Fragar L, Fuller J, Lyle D, Beard JR.	2011	Determinants of mental health and well-being within rural and remote communities	n	n	n	n	n	n	n	y	n		10.1016/j.ijporl.2018.03.036
kelsey2019	Kelsey C, Dreisbach C, Alhusen J, Grossmann T.	2019	A primer on investigating the role of the microbiome in brain and cognitive development	n	n	n	n	n	n	n	y	n		10.1016/j.schres.2018.03.021
kessler2014	Kessler RC, Rose S, Koenen KC, Karam EG, Stang PE, Stein DJ, Heeringa SG, Hill ED, Liberzon I, McLaughlin KA, McLean SA, Pennell BE, Petukhova M, Rosellini AJ, Ruscio AM, Shahly V, Shalev AY, Silove D, Zaslavsky AM, Angermeyer MC, Bromet EJ, de Almeida JM, de Girolamo G, de Jonge P, Demyttenaere K, Florescu SE, Gureje O, Haro JM, Hinkov H, Kawakami N, Kovess-Masfety V, Lee S, Medina-Mora ME, Murp…	2014	How well can post-traumatic stress disorder be predicted from pre-trauma risk factors? An exploratory study in the WHO World Mental Health Surveys	n	n	n	n	n	n	n	y	n		10.1016/j.socscimed.2013.06.015
kessler2017	Kessler RC, Stein MB, Petukhova MV, Bliese P, Bossarte RM, Bromet EJ, Fullerton CS, Gilman SE, Ivany C, Lewandowski-Romps L, Millikan Bell A, Naifeh JA, Nock MK, Reis BY, Rosellini AJ, Sampson NA, Zaslavsky AM, Ursano RJ; Army STARRS Collaborators.	2017	Predicting suicides after outpatient mental health visits in the Army Study to Assess Risk and Resilience in Servicemembers (Army STARRS)	n	n	n	n	n	n	n	y	n		10.3389/fnsys.2013.00071
khan2014	Khan, M. M. H.; Gruebner, Oliver; Kraemer, Alexander	2014	Is area affected by flood or stagnant water independently associated with poorer health outcomes in urban slums of Dhaka and adjacent rural areas?	n	n	n	n	n	n	n	y	n		10.1007/s11266-013-9423-0
khan2020	Khan A.	2020	Can walking groups help with social isolation: a qualitative study	n	n	n	n	n	n	n	y	n		10.1111/1556-4029.13537
kibria2019	Kibria, Abu S. M. G.; Costanza, Robert; Groves, Colin; Behie, Alison M.	2019	Does higher access ensure greater wellbeing? - In the perspective of forest ecosystem services of the Sundarbans mangrove forest, Bangladesh	n	n	n	n	n	n	n	y	n		10.1177/0194599813477596
kildea2018	Kildea S, Simcock G, Liu A, Elgbeili G, Laplante DP, Kahler A, Austin MP, Tracy S, Kruske S, Tracy M, O'Hara MW, King S.	2018	Continuity of midwifery carer moderates the effects of prenatal maternal stress on postnatal maternal wellbeing: the Queensland flood study	n	n	n	n	n	n	n	y	n		10.1002/wcs.67
kilian2018	Kilian J, Kitazawa M.	2018	The emerging risk of exposure to air pollution on?ßcognitive decline and Alzheimer's disease - Evidence from epidemiological and animal studies	n	n	n	n	n	n	n	y	n		x
kim2010	Kim, Ho-Hyun; Park, Jung-Won; Yang, Ji-Yeon; Kim, Kwang-Jin; Lee, Jae-Young; Shin, Dong-Chun; Lim, Young-Wook	2010	Evaluating the Relative Health of Residents in Newly Built Apartment Houses according to the Presence of Indoor Plants	n	n	n	n	n	n	n	y	n		10.1146/annurev-clinpsy-021815-093634
kim2011	Kim, Ho-Hyun; Lee, Jae-Young; Yang, Ji-Yeon; Kim, Kwang-Jin; Lee, Yong-Jin; Shin, Dong-Chun; Lim, Young-Wook	2011	Evaluation of Indoor Air Quality and Health Related Parameters in Office Buildings with or without Indoor Plants	n	n	n	n	n	n	n	y	n		10.1016/j.jad.2016.07.032
kim2013	Kim YM, Park JH, Choi K, Noh SR, Choi YH, Cheong HK.	2013	Burden of disease attributable to the Hebei Spirit oil spill in Taean, Korea	n	n	n	n	n	n	n	y	n		10.2147/PPA.S162206
kim2013a	Kim J, Norton D, McBain R, Ongur D, Chen Y.	2013	Deficient biological motion perception in schizophrenia: results from a motion noise paradigm	n	n	n	n	n	n	n	y	n		10.1371/journal.pone.0118739
kim2017	Kim, Jimin; Hong, Taehoon; Jeong, Jaemin; Koo, Choongwan; Kong, Minjin	2017	An integrated psychological response score of the occupants based on their activities and the indoor environmental quality condition changes	n	n	n	n	n	n	n	y	n		10.1166/asl.2017.9262
kim2019	Kim H, Noh J, Noh Y, Oh SS, Koh SB, Kim C.	2019	Gender Difference in the Effects of Outdoor Air Pollution on Cognitive Function Among Elderly in Korea	n	n	n	n	n	n	n	y	n		10.1080/02642069.2017.1351550
kim2020	Kim H, Kim S, Kong SS, Jeong YR, Kim H, Kim N.	2020	Possible Application of Ecological Momentary Assessment to Older Adults' Daily Depressive Mood: Integrative Literature Review	n	n	n	n	n	n	n	y	n		10.3390/ijerph15020267
kinay2019	Kinay, Pelin; Morse, Andrew P.; Villanueva, Elmer V.; Morrissey, Karyn; Staddon, Philip L.	2019	Direct and indirect health impacts of climate change on the vulnerable elderly population in East China	n	n	n	n	n	n	n	y	n		10.1016/j.jrurstud.2020.01.010
king2015	King, Tanya; Kilpatrick, Sue; Willis, Karen; Speldewinde, Christopher	2015	A Different Kettle of Fish: Mental health strategies for Australian fishers, and farmers	n	n	n	n	n	n	n	y	n		x
king2015a	King S, Kildea S, Austin MP, Brunet A, Cobham VE, Dawson PA, Harris M, Hurrion EM, Laplante DP, McDermott BM, McIntyre HD, O'Hara MW, Schmitz N, Stapleton H, Tracy SK, Vaillancourt C, Dancause KN, Kruske S, Reilly N, Shoo L, Simcock G, Turcotte-Tremblay AM, Yong Ping E.	2015	QF2011: a protocol to study the effects of the Queensland flood on pregnant women, their pregnancies, and their children's early development	n	n	n	n	n	n	n	y	n		10.1007/978-3-319-59740-9_19
king2016	King RV, Polatin PB, Hogan D, Downs DL, North CS.	2016	Needs Assessment of Hurricane Katrina Evacuees Residing Temporarily in Dallas	n	n	n	n	n	n	n	y	n		10.1186/1752-1505-8-22
kingdom2011	Kingdom SE, Smith AP.	2011	Psychosocial risk factors for work-related stress in Her Majesty's Coastguard	n	n	n	n	n	n	n	y	n		10.3390/ijerph17113965
kingston2019	Kingston D, Mughal MK, Arshad M, Kovalchuk I, Metz GAS, Wynne-Edwards K, King S, Jiang S, Postovit L, Wajid A, McDonald S, Slater DM, Tough SC, Aitchison K, Arnold P.	2019	Prediction and Understanding of Resilience in Albertan Families: Longitudinal Study of Disaster Responses (PURLS) - Protocol	n	n	n	n	n	n	n	y	n		10.7196/SAJP.386
kirch2018	Kirch, Darrell G.; Petelle, Kate	2018	Addressing the Health Effects of Climate Change: an Approach Based on Evidence and Ethics	n	n	n	n	n	n	n	y	n		10.1177/1090198119863775
kirsch2013	Kirsch T, Siddiqui MA, Perrin PC, Robinson WC, Sauer LM, Doocy S.	2013	Satisfaction with the humanitarian response to the 2010 Pakistan floods: a call for increased accountability to beneficiaries	n	n	n	n	n	n	n	y	n		10.1093/jhmas/jrv034
kishore2011	Kishore J, Gupta A, Jiloha RC, Bantman P.	2011	Myths, beliefs and perceptions about mental disorders and health-seeking behavior in Delhi, India	n	n	n	n	n	n	n	y	n		10.1111/cdep.12105
kjellstrom2013	Kjellstrom T, McMichael AJ.	2013	Climate change threats to population health and well-being: the imperative of protective solutions that will last	n	n	n	n	n	n	n	y	n		10.3998/jmmh.10381607.0011.203
klatte2013	Klatte M, Bergstr?┬m K, Lachmann T.	2013	Does noise affect learning? A short review on noise effects on cognitive performance in children	n	n	n	n	n	n	n	y	n		10.17795/ijcp-3965
kleisiaris2014	Kleisiaris CF, Sfakianakis C, Papathanasiou IV.	2014	Health care practices in ancient Greece: The Hippocratic ideal	n	n	n	n	n	n	n	y	n	historic	10.3109/09638237.2014.954692
klompmaker2019	Klompmaker JO, Hoek G, Bloemsma LD, Wijga AH, van den Brink C, Brunekreef B, Lebret E, Gehring U, Janssen NAH.	2019	Associations of combined exposures to surrounding green, air pollution and traffic noise on mental health	n	n	n	n	n	n	n	y	n		10.1017/gmh.2020.6
knopf2013	Knopf A.	2013	Treating mental illness and addiction in Salt Lake County	n	n	n	n	n	n	n	y	n		10.1007/s10566-009-9090-x
koehlmoos2011	Koehlmoos TP, Anwar S, Cravioto A.	2011	Global health: chronic diseases and other emergent issues in global health	n	n	n	n	n	n	n	y	n		10.1007/s00737-017-0781-2
kohen2015	Kohen DE, Bougie E, Gu?┐vremont A.	2015	Housing and health among Inuit children	n	n	n	n	n	n	n	y	n		10.1080/00207179.2019.1706101
kohli2020	Kohli M, Magoulas GD, Thomas MSC.	2020	Evolving Connectionist Models to Capture Population Variability across Language Development: Modeling Children's Past Tense Formation	n	n	n	n	n	n	n	y	n		10.1371/journal.pone.0147741
koka2020	Koka K, Patel BC.	2020	Ptosis Correction	n	n	n	n	n	n	n	y	n		10.1016/j.ypmed.2016.02.025
kolvir2020	Kolvir, Hojjatollah Rashid; Madadi, Aghil; Safarianzengir, Vahid; Sobhani, Behrouz	2020	Monitoring and analysis of the effects of atmospheric temperature and heat extreme of the environment on human health in Central Iran, located in southwest Asia	n	n	n	n	n	n	n	y	n		10.1016/j.colegn.2013.12.007
komorowska2018	Komorowska, Anna	2018	Forest School - a forest playground as a remedy for nature-deficit disorder in children	n	n	n	n	n	n	n	y	n		10.14718/ACP.2018.21.1.8
kondo2020	Kondo MC, Mueller N, Locke DH, Roman LA, Rojas-Rueda D, Schinasi LH, Gascon M, Nieuwenhuijsen MJ.	2020	Health impact assessment of Philadelphia's 2025 tree canopy cover goals	n	n	n	n	n	n	n	y	n		10.1007/s10071-016-0999-9
kousky2016	Kousky, Carolyn	2016	Impacts of Natural Disasters on Children	n	n	n	n	n	n	n	y	n		10.1007/s10329-019-00734-z
kouvonen2010	Kouvonen AM, V?±?±n?±nen A, Vahtera J, Heponiemi T, Koskinen A, Cox SJ, Kivim?±ki M.	2010	Sense of coherence and psychiatric morbidity: a 19-year register-based prospective study	n	n	n	n	n	n	n	y	n		10.1186/s12888-019-2074-y
krasny2014	Krasny, Marianne E.; Delia, Jesse	2014	Campus sustainability and natural area stewardship: student involvement in adaptive comanagement	n	n	n	n	n	n	n	y	n		10.1007/s40572-018-0210-3
kratzer2019	Kratzer L, Heinz P, Schennach R, Schiepek GK, Padberg F, Jobst A.	2019	[Inpatient Treatment of Complex PTSD Following Childhood Abuse: Effectiveness and Predictors of Treatment Outcome]	n	n	n	n	n	n	n	y	n		x
krause2015	Krause, Neal	2015	Making theWorkWe Do More Relevant: Using Religion and Health as a Template	n	n	n	n	n	n	n	y	n		x
krawisz2020	Krawisz B.	2020	Health Effects of Climate Destabilization: Understanding the Problem	n	n	n	n	n	n	n	y	n		10.3389/fnins.2019.01279
kreinin2014	Kreinin A, Shakera T, Sheinkman A, Levi T, Tal V, Polakiewicz J.	2014	Evacuation of a mental health center during a forest fire in Israel	n	n	n	n	n	n	n	y	n		10.3389/fnhum.2014.00350
kretzschmar2012	Kretzschmar I, Nyan O, Mendy AM, Janneh B.	2012	Mental health in the Republic of The Gambia	n	n	n	n	n	n	n	y	n		10.3389/fnins.2020.00093
krishnaswamy2012	Krishnaswamy S, Subramaniam K, Indran T, Low WY.	2012	The 2004 tsunami in Penang, Malaysia: early mental health intervention	n	n	n	n	n	n	n	y	n		10.1097/YCO.0000000000000143
kroon2011	Kroon, H.; Boevink, W.; van Vugt, M.; Delespaul, P.; van Os, J.	2011	TREE: a Dutch multi-centre (cluster) randomized trial of a recovery program of/for persons with severe mental illness	n	n	n	n	n	n	n	y	n		10.1186/1753-2000-6-15
kruger2017	Kruger, Daniel J.; Cupal, Suzanne; Franzen, Susan P.; Kodjebacheva, Gergana; Bailey, Elder Sarah; Key, Kent D.; Kaufman, Martin M.	2017	Toxic trauma: Household water quality experiences predict posttraumatic stress disorder symptoms during the Flint, Michigan, water crisis	n	n	n	n	n	n	n	y	n		10.1016/j.healthpol.2019.05.011
kruger2017a	Kruger DJ, Kodjebacheva GD, Cupal S.	2017	Poor tap water quality experiences and poor sleep quality during the Flint, Michigan Municipal Water Crisis	n	n	n	n	n	n	n	y	n		10.1016/j.resconrec.2017.11.024
krystal2014	Krystal JH, State MW.	2014	Psychiatric disorders: diagnosis to therapy	n	n	n	n	n	n	n	y	n		10.1080/08897077.2020.1740379
kulick2019	Kulick, Erin; Wellenius, Gregory; Boehme, Amelia; Schupf, Nicole; Mayeux, Richard; Sacco, Ralph; Manly, Jennifer; Elkind, Mitchell	2019	Long-term Exposure to Ambient Air Pollution and Trajectories of Cognitive Decline among Older Adults in Northern Manhattan	n	n	n	n	n	n	n	y	n		10.1016/j.genhosppsych.2020.07.002
kulick2020	Kulick ER, Wellenius GA, Boehme AK, Joyce NR, Schupf N, Kaufman JD, Mayeux R, Sacco RL, Manly JJ, Elkind MSV.	2020	Long-term exposure to air pollution and trajectories of cognitive decline among older adults	n	n	n	n	n	n	n	y	n		10.3892/etm.2020.8671
kulick2020a	Kulick ER, Elkind MSV, Boehme AK, Joyce NR, Schupf N, Kaufman JD, Mayeux R, Manly JJ, Wellenius GA.	2020	Long-term exposure to ambient air pollution, APOE-?┴4 status, and cognitive decline in a cohort of older adults in northern Manhattan	n	n	n	n	n	n	n	y	n		10.1080/15325024.2020.1780748
kulkarni2014	Kulkarni V, Chinnakali P, Kanchan T, Rao A, Shenoy M, Papanna MK.	2014	Psychiatric Co-morbidities among Patients with Select Non-communicable Diseases in a Coastal City of South India	n	n	n	n	n	n	n	y	n		10.12688/f1000research.9625.2
kumar2019	Kumar P, Druckman A, Gallagher J, Gatersleben B, Allison S, Eisenman TS, Hoang U, Hama S, Tiwari A, Sharma A, Abhijith KV, Adlakha D, McNabola A, Astell-Burt T, Feng X, Skeldon AC, de Lusignan S, Morawska L.	2019	The nexus between air pollution, green infrastructure and human health	n	n	n	n	n	n	n	y	n		10.1016/j.mnl.2015.12.013
kumar2020	Kumar A, Somani A.	2020	Dealing with Corona virus anxiety and OCD	n	n	n	n	n	n	n	y	y		10.1016/j.socscimed.2012.09.045
kuo2015	Kuo, Ming	2015	How might contact with nature promote human health? Promising mechanisms and a possible central pathway	n	n	n	n	n	n	n	y	n		10.1089/crispr.2017.0015
kurti2016	Kurti AN, Keith DR, Noble A, Priest JS, Sprague B, Higgins ST.	2016	Characterizing the intersection of Co-occurring risk factors for illicit drug abuse and dependence in a U.S. nationally representative sample	n	n	n	n	n	n	n	y	n		10.1186/s12995-020-00264-1
kyriklaki2016	Kyriklaki A, Vafeiadi M, Kampouri M, Koutra K, Roumeliotaki T, Chalkiadaki G, Anousaki D, Rantakokko P, Kiviranta H, Fthenou E, Bitsios P, Kyrtopoulos SA, Kogevinas M, Chatzi L.	2016	Prenatal exposure to persistent organic pollutants in association with offspring neuropsychological development at 4years of age: The Rhea mother-child cohort, Crete, Greece	n	n	n	n	n	n	n	y	n		10.1016/j.jad.2019.02.007
labont2015	Labont?« R, Cobbett E, Orsini M, Spitzer D, Schrecker T, Ruckert A.	2015	Globalization and the health of Canadians: 'Having a job is the most important thing'	n	n	n	n	n	n	n	y	n		10.1177/1524839917707791
lagonigro2018	Lagonigro, Raymond; Caries Martori, Joan; Apparicio, Philippe	2018	Environmental noise inequity in the city of Barcelona	n	n	n	n	n	n	n	y	n		10.1016/j.ecoser.2019.101036
lai2017	Lai BS, Tiwari A, Self-Brown S, Cronholm P, Kinnish K.	2017	Patterns of Caregiver Factors Predicting Participation in Trauma-Focused Cognitive Behavioral Therapy	n	n	n	n	n	n	n	y	n		10.1016/j.newideapsych.2020.100801
laios2018	Laios K, Kontaxaki MI, Markatos K, Lagiou E, Karamanou M, Androutsos G.	2018	[Psychosomatic disorders in ancient Greek medicine]	n	n	n	n	n	n	n	y	n	historical	10.1016/j.ypmed.2019.105853
laios2019	Laios K, Lytsikas-Sarlis P, Manes K, Kontaxaki MI, Karamanou M, Androutsos G.	2019	Drugs for mental illnesses in ancient greek medicine	n	n	n	n	n	n	n	y	n	historical	10.1093/tas/txy144
lambert2016	Lambert D, Gale J, Hartley D, Croll Z, Hansen A.	2016	Understanding the Business Case for Telemental Health in Rural Communities	n	n	n	n	n	n	n	y	n		10.1177/1059840510388570
lamond2015	Lamond JE, Joseph RD, Proverbs DG.	2015	An exploration of factors affecting the long term psychological impact and deterioration of mental health in flooded households	n	n	n	n	n	n	n	y	n		10.4306/pi.2010.7.3.170
langabeer2020	Langabeer JR, Chambers KA, Cardenas-Turanzas M, Champagne-Langabeer T.	2020	County-level factors underlying opioid mortality in the United States	n	n	n	n	n	n	n	y	n		x
lanphear2015	Lanphear BP.	2015	The impact of toxins on the developing brain	n	n	n	n	n	n	n	y	n		10.1145/3007195
lapaige2010	Lapaige V, Essiembre H.	2010	Innoversity in knowledge-for-action and adaptation to climate change: the first steps of an 'evidence-based climatic health' transfrontier training program	n	n	n	n	n	n	n	y	n		10.1016/j.jecp.2010.10.007
lapaige2011	Lapaige, Veronique	2011	THE EMERGENCE OF WEATHER-RELATED DISASTER PUBLIC HEALTH AND MENTAL HEALTH DISCIPLINE: WEB 2.0 AND WEB 3.0 CONTINUING MEDICAL EDUCATION IS REQUIRED	n	n	n	n	n	n	n	y	n		10.1177/1533317518777859
lapaige2011a	Lapaige, Veronique	2011	EECOHEALTH: ADAPTIVE TRANSFRONTIER ECOLEARNING FOR CLIMATE CHANGE-ORIENTED EHEALTH AND CLIMATE-SENSITIVE PSYCHOPATHOLOGY	n	n	n	n	n	n	n	y	n		x
lapaige2012	Lapaige, Veronique	2012	GLOBALIZATION AND KNOWLEDGE TRANSLATION SCIENCE IN MENTAL ECOHEALTH: NEW ACTORS, RENEWED PERSPECTIVES	n	n	n	n	n	n	n	y	n		10.1097/YPG.0b013e32834dc40d
larkin2019	Larkin A, Hystad P.	2019	Evaluating street view exposure measures of visible green space for health research	n	n	n	n	n	n	n	y	n		10.1016/s0254-6272(15)30055-8
larson2018	Larson LR, Barger B, Ogletree S, Torquati J, Rosenberg S, Gaither CJ, Bartz JM, Gardner A, Moody E, Schutte A.	2018	Gray space and green space proximity associated with higher anxiety in youth with autism	n	n	n	n	n	n	n	y	n		10.1192/bjpo.bp.115.002402
lattie2019	Lattie EG, Lipson SK, Eisenberg D.	2019	Technology and College Student Mental Health: Challenges and Opportunities	n	n	n	n	n	n	n	y	n		10.1016/j.ajhg.2015.01.003
lattie2020	Lattie EG, Kornfield R, Ringland KE, Zhang R, Winquist N, Reddy M.	2020	Designing Mental Health Technologies that Support the Social Ecosystem of College Students	n	n	n	n	n	n	n	y	n		10.1016/j.ajp.2020.102053
lauwers2020	Lauwers L, Trabelsi S, Pelgrims I, Bastiaens H, De Clercq E, Guilbert A, Guyot M, Leone M, Nawrot T, Van Nieuwenhuyse A, Remmen R, Saenen N, Thomas I, Keune H.	2020	Urban environment and mental health: the NAMED project, protocol for a mixed-method study	n	n	n	n	n	n	n	y	n		10.1111/phn.12219
lavadera2020	Lavadera P, Millon EM, Shors TJ.	2020	MAP Train My Brain: Meditation Combined with Aerobic Exercise Reduces Stress and Rumination While Enhancing Quality of Life in Medical Students	n	n	n	n	n	n	n	y	n		10.1038/s41467-019-10196-y
lavoie2020	Lavoie JG, Phillips-Beck W, Kinew KA, Katz A.	2020	Manitoba First Nation peoples' use of hospital-based mental health services: trends and solutions	n	n	n	n	n	n	n	y	n		10.1037/a0016110
le2013	Le, Felice; Tracy, Melissa; Norris, Fran H.; Galea, Sandro	2013	Displacement, county social cohesion, and depression after a large-scale traumatic event	n	n	n	n	n	n	n	y	n		10.1016/j.neucom.2020.01.034
leavey2010	Leavey G.	2010	The appreciation of the spiritual in mental illness: a qualitative study of beliefs among clergy in the UK	n	n	n	n	n	n	n	y	n		10.1080/02770903.2020.1742352
lebowitz2019	Lebowitz A, Tachikawa H, Aiba M, Okamoto Y, Takahashi S, Nemoto K, Arai T.	2019	Post-flood social support networks and morbidity in J??s?? City, Japan	n	n	n	n	n	n	n	y	n		10.1007/s11013-014-9369-8
lederbogen2013	Lederbogen F, Haddad L, Meyer-Lindenberg A.	2013	Urban social stress--risk factor for mental disorders. The case of schizophrenia	n	n	n	n	n	n	n	y	n		10.3389/fpsyg.2013.00391
lee2011	Lee J, Park BJ, Tsunetsugu Y, Ohira T, Kagawa T, Miyazaki Y.	2011	Effect of forest bathing on physiological and psychological responses in young Japanese male subjects	n	n	n	n	n	n	n	y	n		10.1136/emermed-2012-201235
lee2012	Lee, Matthew R.; Blanchard, Troy C.	2012	Community Attachment and Negative Affective States in the Context of the BP Deepwater Horizon Disaster	n	n	n	n	n	n	n	y	n		10.1590/0034-7167-2019-0213
lee2017a	Lee YC, Gao L, Dear BF, Titov N, Mihalopoulos C.	2017	The Cost-effectiveness of the Online MindSpot Clinic for the Treatment of Depression and Anxiety in Australia	n	n	n	n	n	n	n	y	n		10.4314/ijmu.v12i1.4
lee2019	Lee H, Jung J, Myung W, Baek JH, Kang JM, Kim DK, Kim H.	2019	Association between dust storm occurrence and risk of suicide: Case-crossover analysis of the Korean national death database	n	n	n	n	n	n	n	y	n		10.1007/s11920-019-1069-1
lee2019a	Lee, Hyun Jin; Son, Yong-Hoon; Kim, Songyi; Lee, Dong Kun	2019	Healing experiences of middle-aged women through an urban forest therapy program	n	n	n	n	n	n	n	y	n		10.1038/s41398-019-0595-2
lee2020	Lee, Ju-hyoung; Park, Ji-sook; Choi, Sunnam	2020	Environmental influence in the forested area toward human health: incorporating the ecological environment into art psychotherapy	n	n	n	n	n	n	n	y	n		10.1007/s13755-018-0046-0
leenders2011	Leenders M, Dyer GM, Saunders V.	2011	Work in progress: Creative Recovery to creative livelihoods	n	n	n	n	n	n	n	y	n		10.1016/j.psc.2011.11.006
leibold2018	Leibold NK, Schruers KR.	2018	Assessing Panic: Bridging the Gap Between Fundamental Mechanisms and Daily Life Experience	n	n	n	n	n	n	n	y	n		10.1093/jamia/ocz221
leiter2013	Leiter, Michael P.; Hakanen, Jari J.; Ahola, Kirsi; Toppinen-Tanner, Salla; Koskinen, Aki; Vaananen, Ari	2013	Organizational predictors and health consequences of changes in burnout: A 12-year cohort study	n	n	n	n	n	n	n	y	n		10.1289/EHP167
lemieux2019	Lemieux, Catherine M.; Moles, Aimee; Brown, Kimberly M.; Borskey, Erma J.	2019	Social Work Students in the Aftermath of the Great Flood of 2016: Mental Health, Substance Use, and Adaptive Coping	n	n	n	n	n	n	n	y	n		10.1097/QAD.0000000000000846
lengen2015	Lengen C.	2015	The effects of colours, shapes and boundaries of landscapes on perception, emotion and mentalising processes promoting health and well-being	n	n	n	n	n	n	n	y	n		10.1109/EMBC.2014.6943730
leraas2018	Leraas BC, Smith KE, Utzinger LM, Cao L, Engel SG, Crosby RD, Mitchell JE, Wonderlich SA.	2018	Affect-based profiles of bulimia nervosa: The utility and validity of indicators assessed in the natural environment	n	n	n	n	n	n	n	y	n		x
lerner2017	Lerner H, Berg C.	2017	A Comparison of Three Holistic Approaches to Health: One Health, EcoHealth, and Planetary Health	n	n	n	n	n	n	n	y	n		10.1007/s12553-018-0271-1
lertxundi2015	Lertxundi A, Baccini M, Lertxundi N, Fano E, Aranbarri A, Mart?ínez MD, Ayerdi M, ?³lvarez J, Santa-Marina L, Dorronsoro M, Ibarluzea J.	2015	Exposure to fine particle matter, nitrogen dioxide and benzene during pregnancy and cognitive and psychomotor developments in children at 15 months of age	n	n	n	n	n	n	n	y	n		10.1016/j.bbrc.2014.09.102
lertxundi2019	Lertxundi A, Andiarena A, Mart?ínez MD, Ayerdi M, Murcia M, Estarlich M, Guxens M, Sunyer J, Julvez J, Ibarluzea J.	2019	Prenatal exposure to PM(2.5) and NO(2) and sex-dependent infant cognitive and motor development	n	n	n	n	n	n	n	y	n		10.1145/3313831.3376362
lesch2019	Lesch, Heather; Burcher, Kimberly; Wharton, Tracy; Chapple, Reshawna; Chapple, Kiara	2019	Barriers to Healthcare Services and Supports for Signing Deaf Older Adults	n	n	n	n	n	n	n	y	n		x
lett2017	Lett LA, Stingone JA, Claudio L.	2017	The Combined Influence of Air Pollution and Home Learning Environment on Early Cognitive Skills in Children	n	n	n	n	n	n	n	y	n		10.3368/lj.37.1.55
levai2018	Levai, Mihaela Codrina; Kanalas, Ghizela; Micu-Serbu, Iulia Bianca; Talpos, Cristina; Anghel, Mirella; Krems, Cristian Dan; Podariu, Alexandra Sabina	2018	Resilience and Risk Factors in Children Originated from Families in which Parents Migrate due to Labor Conditions	n	n	n	n	n	n	n	y	n		10.3390/su11226425
levy2017	Levy BS, Sidel VW, Patz JA.	2017	Climate Change and Collective Violence	n	n	n	n	n	n	n	y	n		10.1111/ggi.13863
lewis2014	Lewis, James; Lewis, Sarah A. V.	2014	Processes of vulnerability in England? Place, poverty and susceptibility	n	n	n	n	n	n	n	y	n		10.1109/EMBC.2019.8857691
lewis2015	Lewis, Krystal M.; Langley, Audra K.; Jones, Russell T.	2015	Impact of Coping Efficacy and Acculturation on Psychopathology in Adolescents Following a Wildfire	n	n	n	n	n	n	n	y	n		10.21437/Interspeech.2016-384
li2020	Li D, Chaudhary H, Zhang Z.	2020	Modeling Spatiotemporal Pattern of Depressive Symptoms Caused by COVID-19 Using Social Media Data Mining	n	n	n	n	n	n	n	y	y		10.2196/10136
liang2019	Liang J, Wu HB, Wang XX.	2019	Distribution characteristics and health risk assessment of heavy metals and PAHs in the soils of green spaces in Shanghai, China	n	n	n	n	n	n	n	y	n		10.1371/journal.pone.0225178
liao2019	Liao J, Zhang B, Xia W, Cao Z, Zhang Y, Liang S, Hu K, Xu S, Li Y.	2019	Residential exposure to green space and early childhood neurodevelopment	n	n	n	n	n	n	n	y	n		x
lieber2017	Lieber M.	2017	Assessing the Mental Health Impact of the 2011 Great Japan Earthquake, Tsunami, and Radiation Disaster on Elementary and Middle School Children in the Fukushima Prefecture of Japan	n	n	n	n	n	n	n	y	n		10.1007/s00127-010-0305-0
lieberman2017	Lieberman-Cribbin W, Liu B, Schneider S, Schwartz R, Taioli E.	2017	Self-Reported and FEMA Flood Exposure Assessment after Hurricane Sandy: Association with Mental Health Outcomes	n	n	n	n	n	n	n	y	n		10.1371/journal.pone.0152669
liggins2013	Liggins J, Kearns RA, Adams PJ.	2013	Using autoethnography to reclaim the 'place of healing' in mental health care	n	n	n	n	n	n	n	y	n		10.1016/j.procs.2018.07.245
lim2018	Lim J, Kweon K, Kim HW, Cho SW, Park J, Sim CS.	2018	Negative impact of noise and noise sensitivity on mental health in childhood	n	n	n	n	n	n	n	y	n		10.1017/S1049023X1900431X
lima2015	Lima ML, Morais R.	2015	Lay perceptions of health and environmental inequalities and their associations to mental health	n	n	n	n	n	n	n	y	n		10.1080/09638237.2017.1370631
lima2020a	Lima, Fatima; Ferreira, Paula; Leal, Vitor	2020	A Review of the Relation between Household Indoor Temperature and Health Outcomes	n	n	n	n	n	n	n	y	n		10.1108/JCS-06-2014-0032
lin2016	Lin S, Lu Y, Justino J, Dong G, Lauper U.	2016	What Happened to Our Environment and Mental Health as a Result of Hurricane Sandy?	n	n	n	n	n	n	n	y	n		x
lin2017	Lin H, Guo Y, Kowal P, Airhihenbuwa CO, Di Q, Zheng Y, Zhao X, Vaughn MG, Howard S, Schootman M, Salinas-Rodriguez A, Yawson AE, Arokiasamy P, Manrique-Espinoza BS, Biritwum RB, Rule SP, Minicuci N, Naidoo N, Chatterji S, Qian ZM, Ma W, Wu F.	2017	Exposure to air pollution and tobacco smoking and their combined effects on depression in six low- and middle-income countries	n	n	n	n	n	n	n	y	n		10.1016/j.jpsychires.2019.12.006
liu2014	Liu J, Chen Y, Gao D, Jing J, Hu Q.	2014	Prenatal and postnatal lead exposure and cognitive development of infants followed over the first three years of life: a prospective birth study in the Pearl River Delta region, China	n	n	n	n	n	n	n	y	n		10.7812/TPP/18-010
liu2015a	Liu, Wei; Shi, Benhui; Jiang, Lanping; Tangs, Xiaolin	2015	The Impact of Health Education or Health of the Victims of the Earthquake in Disaster Area	n	n	n	n	n	n	n	y	n		10.1111/jrh.12323
liu2017	Liu, Hai-Ying; Dunea, Daniel; Oprea, Mihaela; Savu, Tom; Iordache, Stefania	2017	Improving the Protection of Children Against Air Pollution Threats in Romania - The RokidAIR Project Approach and Future Perspectives	n	n	n	n	n	n	n	y	n		10.1037/pas0000266
liu2018	Liu X, Liu H, Fan H, Liu Y, Ding G.	2018	Influence of Heat Waves on Daily Hospital Visits for Mental Illness in Jinan, China-A Case-Crossover Study	n	n	n	n	n	n	n	y	n		10.3390/ijerph14070820
liu2019	Liu, Ye; Wang, Ruoyu; Grekousis, George; Liu, Yuqi; Yuan, Yuan; Li, Zhigang	2019	Neighbourhood greenness and mental wellbeing in Guangzhou, China: What are the pathways?	n	n	n	n	n	n	n	y	n		10.1176/appi.ps.201600553
liu2020a	Liu H, Zhou Z, Fan X, Wang J, Sun H, Shen C, Zhai X.	2020	The Influence of Left-Behind Experience on College Students' Mental Health: A Cross-Sectional Comparative Study	n	n	n	n	n	n	n	y	n		10.1037/pas0000334
loder2020	Loder AKF, Gspurning J, Paier C, van Poppel MNM.	2020	Objective and Perceived Neighborhood Greenness of Students Differ in their Agreement in Home and Study Environments	n	n	n	n	n	n	n	y	n		10.1186/s12889-019-6564-0
logan2012	Logan AC, Selhub EM.	2012	Vis Medicatrix naturae: does nature "minister to the mind"?	n	n	n	n	n	n	n	y	n		x
logan2014	Logan AC, Jacka FN.	2014	Nutritional psychiatry research: an emerging discipline and its intersection with global urbanization, environmental challenges and the evolutionary mismatch	n	n	n	n	n	n	n	y	n		10.18564/jasss.2169
logan2015	Logan AC, Katzman MA, Balanz?Ý-Mart?ínez V.	2015	Natural environments, ancestral diets, and microbial ecology: is there a modern "paleo-deficit disorder"? Part II	n	n	n	n	n	n	n	y	n		x
long2019	Long Quang Trinh	2019	Comments on Early Life Exposure to Air Pollution,Cognitive Development, and Labor Market Outcome	n	n	n	n	n	n	n	y	n		10.3233/JAD-200418
longman2019	Longman JM, Bennett-Levy J, Matthews V, Berry HL, Passey ME, Rolfe M, Morgan GG, Braddon M, Bailie R.	2019	Rationale and methods for a cross-sectional study of mental health and wellbeing following river flooding in rural Australia, using a community-academic partnership approach	n	n	n	n	n	n	n	y	n		10.1037/a0033629
looi2019	Looi JC, Maguire P.	2019	Surviving the Heart of Darkness: reflections on the experience of psychiatrists working in public mental health services in Australia	n	n	n	n	n	n	n	y	n		10.6890/IJGE.201912_13(4).0010
lotfalian2014	Lotfalian, M.; Emadian, S. F.; Far, N. Riahi; Salimi, M.; Sheikhmoonesi, F.	2014	OCCUPATIONAL STRESS IMPACT ON MENTAL HEALTH STATUS OF FOREST WORKERS	n	n	n	n	n	n	n	y	n		10.3414/ME10-01-0062
lovasi2014	Lovasi GS, Eldred-Skemp N, Quinn JW, Chang HW, Rauh VA, Rundle A, Orjuela MA, Perera FP.	2014	Neighborhood Social Context and Individual Polycyclic Aromatic Hydrocarbon Exposures Associated with Child Cognitive Test Scores	n	n	n	n	n	n	n	y	n		10.1007/s10926-019-09852-3
love2019	Love HE, Schlitt J, Soleimanpour S, Panchal N, Behr C.	2019	Twenty Years Of School-Based Health Care Growth And Expansion	n	n	n	n	n	n	n	y	n		10.3390/ijerph15040813
lu2016	Lu CF, Tung CC, Ely L.	2016	[Reflection on the Differences and Similarities of Mental Health Care in Virginia and Taiwan: Geography, History, Culture, and Nurse Practitioners]	n	n	n	n	n	n	n	y	n		10.1111/jcpp.12927
lu2018	Lu J, Wang F, Chai P, Wang D, Li L, Zhou X.	2018	Mental health status, and suicidal thoughts and behaviors of migrant children in eastern coastal China in comparison to urban children: a cross-sectional survey	n	n	n	n	n	n	n	y	n		10.1002/ijop.12129
lu2020	Lu P, Zhang Y, Xia G, Zhang W, Xu R, Wang C, Guo Y, Li S.	2020	Attributable risks associated with hospital outpatient visits for mental disorders due to air pollution: A multi-city study in China	n	n	n	n	n	n	n	y	n		10.1016/j.mehy.2019.03.015
lu2020a	Lu, Hui; Yue, Ailing; Liu, Xia	2020	Who is susceptible to perceive higher smog-induced health risk? Comparative analysis between physical and mental health dimensions	n	n	n	n	n	n	n	y	n		10.1016/j.cognition.2020.104252
lu2020b	Lu J, Wang F, Chai P, Wang D, Li L, Zhou X.	2020	Retraction Note to: Mental health status, and suicidal thoughts and behaviors of migrant children in eastern coastal China in comparison to urban children: a cross-sectional survey	n	n	n	n	n	n	n	y	n		x
lynch2017	Lynch, Sean E.; Teich, Judith L.; Smith, Kelley E.	2017	Psychiatric Residential Treatment Centers for Children and Adolescents: Modeling Variation in Facility Definition Type	n	n	n	n	n	n	n	y	n		10.1007/s10612-019-09435-x
ma2013	Ma Shuiping; Li Qiang	2013	A Study on Humanized Design of City Square by Environmental Psychology	n	n	n	n	n	n	n	y	n		10.1145/2632048.2632102
ma2018a	Ma J, Li C, Kwan MP, Chai Y.	2018	A Multilevel Analysis of Perceived Noise Pollution, Geographic Contexts and Mental Health in Beijing	n	n	n	n	n	n	n	y	n		10.1007/s11920-018-0905-z
ma2019	Ma ZF, Yusof N, Hamid N, Lawenko RM, Mohammad WMZW, Liong MT, Sugahara H, Odamaki T, Xiao J, Lee YY.	2019	Bifidobacterium infantis M-63 improves mental health in victims with irritable bowel syndrome developed after a major flood disaster	n	n	n	n	n	n	n	y	n		10.1016/j.cbpra.2009.07.005
ma2020	Ma J, Li C, Kwan MP, Kou L, Chai Y.	2020	Assessing personal noise exposure and its relationship with mental health in Beijing based on individuals' space-time behavior	n	n	n	n	n	n	n	y	n		10.1176/appi.ps.201800193
macdonald2016	MacDonald, Shelley; Winship, Gary	2016	The primary school as a therapeutic community	n	n	n	n	n	n	n	y	n		10.3390/ijerph16183443
macfarlane2015	MacFarlane EK, Shakya R, Berry HL, Kohrt BA.	2015	Implications of participatory methods to address mental health needs associated with climate change: 'photovoice' in Nepal	n	n	n	n	n	n	n	y	n		10.1371/journal.pone.0169277
mackerron2013	MacKerron, George; Mourato, Susana	2013	Happiness is greater in natural environments	n	n	n	n	n	n	n	y	n		10.1371/journal.pone.0230777
mackinnon2012	Mackinnon DF.	2012	A family tree filled with mental illness: review: a lethal inheritance: a mother uncovers the science behind three generations of mental illness by victoria costello	n	n	n	n	n	n	n	y	n		10.1093/advances/nmz051
maclean2016	Maclean JC, Popovici I, French MT.	2016	Are natural disasters in early childhood associated with mental health and substance use disorders as an adult?	n	n	n	n	n	n	n	y	n		10.1016/j.ijpsycho.2015.04.003
macpherson2015	Macpherson CC, Akpinar-Elci M.	2015	Caribbean Heat Threatens Health, Well-being and the Future of Humanity	n	n	n	n	n	n	n	y	n		x
maddox2019	Maddox S, Read DMY, Powell NN, Caton TJ, Dalton HE, Perkins DA.	2019	Reorientation of the Rural Adversity Mental Health Program: the value of a program logic model	n	n	n	n	n	n	n	y	n		10.1016/j.neurobiolaging.2016.03.018
magalhaes2018	Magalhaes, Sabrina de Sousa; Miranda, Diana Kraiser; de Paula, Jonas Jardim; de Miranda, Debora Marques; Romano-Silva, Marco Aurelio; Malloy-Diniz, Leandro Fernandes	2018	Psychometric properties of a Brazilian Portuguese version of the Children's Revised Impact of Event Scale (CRIES-8)	n	n	n	n	n	n	n	y	n		10.1371/journal.pone.0052859
maghrabi2012	Maghrabi, Katibah	2012	Impact of Flood Disaster on the Mental Health of Residents in the Eastern Region of Jeddah Governorate, 2010: A Study in Medical geography	n	n	n	n	n	n	n	y	n		10.1016/j.envres.2020.109614
mahomed2020	Mahomed F.	2020	Addressing the Problem of Severe Underinvestment in Mental Health and Well-Being from a Human Rights Perspective	n	n	n	n	n	n	n	y	n		10.3389/fpubh.2019.00367
mahoney2014	Mahoney, Ashley Darcy; Pinto-Martin, Jennifer; Hanlon, Alexandra	2014	Home Environment, Brain Injury, & School Performance in LBW Survivors	n	n	n	n	n	n	n	y	n		10.1016/j.gloenvcha.2017.11.012
maillard2011	Maillard I.	2011	[Key elements of the evolution of adolescent mental health policies]	n	n	n	n	n	n	n	y	n		10.1038/s41746-019-0084-2
majeed2017	Majeed H, Lee J.	2017	The impact of climate change on youth depression and mental health	n	n	n	n	n	n	n	y	n		x
maltsev2011	Maltsev AV, Bystryak S, Galzitskaya OV.	2011	The role of ??-amyloid peptide in neurodegenerative diseases	n	n	n	n	n	n	n	y	n		10.1139/er-2017-0095
mambrey2019	Mambrey V, Wermuth I, B?┬se-O'Reilly S.	2019	[Extreme weather events and their impact on the mental health of children and adolescents]	n	n	n	n	n	n	n	y	n		10.1002/eat.23082
mancini2019	Mancini, Francesca; Coghill, George M.; Lusseau, David	2019	Quantifying wildlife watchers' preferences to investigate the overlap between recreational and conservation value of natural areas	n	n	n	n	n	n	n	y	n		10.1080/21665044.2016.1219575
manczak2020	Manczak EM, Miller JG, Gotlib IH.	2020	Water contaminant levels interact with parenting environment to predict development of depressive symptoms in adolescents	n	n	n	n	n	n	n	y	n		x
mannix2018	Mannix TR, Austin SD, Baayd JL, Simonsen SE.	2018	A Community Needs Assessment of Urban Utah American Indians and Alaska Natives	n	n	n	n	n	n	n	y	n		x
mansor2017	Mansor, Mazlina; Ghani, Nurfaezah; Harun, Nor Zalina; Zakariya, Khalilah	2017	Conceptual Models of Greenspace and Health	n	n	n	n	n	n	n	y	n		10.1590/1413-81232015213.21392015
mantler2015	Mantler, Annemarie; Logan, Alan C.	2015	Natural environments and mental health	n	n	n	n	n	n	n	y	n		10.1007/s11111-015-0248-1
margariti2017	Margariti M, Hadjulis M, Lazaridou M, Angelidis GF, Fotopoulos V, Markaki L, Koulouri F.	2017	[Clinical guidelines for the management of schizophrenia:Aims and limitations (?Í)]	n	n	n	n	n	n	n	y	n		10.1093/hmg/dds106
margariti2018	Margariti M, Hadjulis M, Lazaridou M, Angelidis GF, Fotopoulos V, Markaki L, Koulouri F.	2018	[Clinical guidelines for the management of schizophrenia (?Í?Í): Community service-level interventions and the role of Primary Care]	n	n	n	n	n	n	n	y	n		10.1177/1462474520925159
markevych2014	Markevych I, Tiesler CM, Fuertes E, Romanos M, Dadvand P, Nieuwenhuijsen MJ, Berdel D, Koletzko S, Heinrich J.	2014	Access to urban green spaces and behavioural problems in children: Results from the GINIplus and LISAplus studies	n	n	n	n	n	n	n	y	n		10.1080/13543784.2020.1795127
markevych2018	Markevych I, Tesch F, Datzmann T, Romanos M, Schmitt J, Heinrich J.	2018	Outdoor air pollution, greenspace, and incidence of ADHD: A semi-individual study	n	n	n	n	n	n	n	y	n		10.1089/acm.2013.0178
marquina2016	Marquina-Marquez, Alfonso; Virchez, Jorge; Ruiz-Callado, Raul	2016	Postcolonial healing landscapes and mental health in a remote Indigenous community in subarctic Ontario, Canada	n	n	n	n	n	n	n	y	n		10.1007/s10900-013-9721-x
marshall2011	Marshall RS, Lazar RM.	2011	Pumps, aqueducts, and drought management: vascular physiology in vascular cognitive impairment	n	n	n	n	n	n	n	y	n		10.3389/fendo.2019.00081
mason2018	Mason LR, Erwin J, Brown A, Ellis KN, Hathaway JM.	2018	Health Impacts of Extreme Weather Events: Exploring Protective Factors with a Capitals Framework	n	n	n	n	n	n	n	y	n		10.1177/0033354920930133
mason2020	Mason LR, Sharma BB, Walters JE, Ekenga CC.	2020	Mental Health and Weather Extremes in a Southeastern U.S. City: Exploring Group Differences by Race	n	n	n	n	n	n	n	y	n		10.1111/bioe.12538
masson2019	Masson, Torsten; Bamberg, Sebastian; Stricker, Michael; Heidenreich, Anna	2019	We can help ourselves: does community resilience buffer against the negative impact of flooding on mental health?	n	n	n	n	n	n	n	y	n		10.1007/s00127-013-0698-7
mathias2015	Mathias K, Kermode M, San Sebastian M, Koschorke M, Goicolea I.	2015	Under the banyan tree--exclusion and inclusion of people with mental disorders in rural North India	n	n	n	n	n	n	n	y	n		10.1038/mp.2013.42
matise2018	Matise, Miles; Ratcliff, Jeffery; Mosci, Flavia	2018	A Working Model for the Integration of Spirituality in Counseling	n	n	n	n	n	n	n	y	n		10.1016/j.healthpol.2020.07.006
matsubara2014	Matsubara C, Murakami H, Imai K, Mizoue T, Akashi H, Miyoshi C, Nakasa T.	2014	Prevalence and risk factors for depressive reaction among resident survivors after the tsunami following the Great East Japan Earthquake, March 11, 2011	n	n	n	n	n	n	n	y	n		10.1145/3281151.3281158
matsubara2016	Matsubara C, Murakami H, Imai K, Mizoue T, Akashi H, Miyoshi C, Nakasa T.	2016	Prevalence and Risk Factors for Post-Traumatic Stress Reaction Among Resident Survivors of the Tsunami That Followed the Great East Japan Earthquake, March 11, 2011	n	n	n	n	n	n	n	y	n		10.3389/fnhum.2018.00152
matsubara2018	Matsubara E, Ohira T.	2018	Inhalation of Japanese cedar (Cryptomeria japonica) wood odor causes psychological relaxation after monotonous work among female participants	n	n	n	n	n	n	n	y	n		10.1016/j.jocn.2017.03.021
matsuda2020	Matsuda, Yui; McCabe, Brian E.; Behar-Zusman, Victoria	2020	Mothering in the Context of Mental Disorder: Effect of Caregiving Load on Maternal Health in a Predominantly Hispanic Sample	n	n	n	n	n	n	n	y	n		10.1111/j.1440-1584.2009.01119.x
matsumoto2014	Matsumoto K.	2014	[Mental health care systems and provisions in the immediate and acute phase of the Great East Japan Earthquake: situational and support activities in Miyagi Prefecture]	n	n	n	n	n	n	n	y	n		10.1177/1363461519847057
matsuoka2012	Matsuoka H.	2012	[The Great East Japan earthquake and mid- and long-term prospect for mental health and welfare in Miyagi Prefecture]	n	n	n	n	n	n	n	y	n		10.1007/s10661-019-7476-2
matthews2019a	Matthews V, Longman J, Berry HL, Passey M, Bennett-Levy J, Morgan GG, Pit S, Rolfe M, Bailie RS.	2019	Differential Mental Health Impact Six Months After Extensive River Flooding in Rural Australia: A Cross-Sectional Analysis Through an Equity Lens	n	n	n	n	n	n	n	y	n		10.2196/mental.9152
maughan2015	Maughan DL, Berry HL.	2015	Mind games: standing by while the world ignores climate change	n	n	n	n	n	n	n	y	n		10.3390/ijerph17103530
maughan2016	Maughan DL, Patel A, Parveen T, Braithwaite I, Cook J, Lillywhite R, Cooke M.	2016	Primary-care-based social prescribing for mental health: an analysis of financial and environmental sustainability	n	n	n	n	n	n	n	y	n		10.1371/journal.pone.0223353
maund2019	Maund PR, Irvine KN, Reeves J, Strong E, Cromie R, Dallimer M, Davies ZG.	2019	Wetlands for Wellbeing: Piloting a Nature-Based Health Intervention for the Management of Anxiety and Depression	n	n	n	n	n	n	n	y	n		10.1016/j.sbspro.2014.04.462
mavoa2019	Mavoa, Suzanne; Lucassen, Mathijs; Denny, Simon; Utter, Jennifer; Clark, Terryann; Smith, Melody	2019	Natural neighbourhood environments and the emotional health of urban New Zealand adolescents	n	n	n	n	n	n	n	y	n		10.3390/ijerph15071541
maybery2020	Maybery D, Jones R, Dipnall JF, Berger E, Campbell T, McFarlane A, Carroll M.	2020	A mixed-methods study of psychological distress following an environmental catastrophe: the case of the Hazelwood open-cut coalmine fire in Australia	n	n	n	n	n	n	n	y	n		10.1111/jocn.14511
mayner2010	Mayner L, Arbon P, Usher K.	2010	Emergency department patient presentations during the 2009 heatwaves in Adelaide	n	n	n	n	n	n	n	y	n		10.1371/journal.pone.0229291
mcallister2017	McAllister E, Bhullar N, Schutte NS.	2017	Into the Woods or a Stroll in the Park: How Virtual Contact with Nature Impacts Positive and Negative Affect	n	n	n	n	n	n	n	y	n		10.1016/j.mehy.2011.02.040
mcbride2019	McBride B, Hawkes S, Buse K.	2019	Soft power and global health: the sustainable development goals (SDGs) era health agendas of the G7, G20 and BRICS	n	n	n	n	n	n	n	y	n		10.1186/s13033-018-0212-4
mccrone2013	McCrone P, Singh SP, Knapp M, Smith J, Clark M, Shiers D, Tiffin PA.	2013	The economic impact of early intervention in psychosis services for children and adolescents	n	n	n	n	n	n	n	y	n		10.1016/j.psychres.2014.10.026
mcdermott2019	McDermott-Levy R, Jackman-Murphy KP, Leffers JM, Jordan L.	2019	Integrating Climate Change Into Nursing Curricula	n	n	n	n	n	n	n	y	n		10.1080/24732850.2017.1297758
mcelroy2010	McElroy KG.	2010	Environmental health effects of concentrated animal feeding operations: implications for nurses	n	n	n	n	n	n	n	y	n		10.1016/j.ocecoaman.2019.04.019
mcewan2019	McEwan K, Richardson M, Sheffield D, Ferguson FJ, Brindley P.	2019	A Smartphone App for Improving Mental Health through Connecting with Urban Nature	n	n	n	n	n	n	n	y	n		10.1371/journal.pone.0168931
mcgorry2015	McGorry PD.	2015	Early intervention in psychosis: obvious, effective, overdue	n	n	n	n	n	n	n	y	n		10.3389/fpsyg.2013.00578
mcintyre2018	McIntyre RS, Lee Y, Carmona NE, Subramaniapillai M, Cha DS, Lee J, Lee JH, Alageel A, Rodrigues NB, Park C, Ragguett RM, Rosenblat JE, Almatham F, Pan Z, Rong C, Mansur RB.	2018	Characterizing, Assessing, and Treating Cognitive Dysfunction in Major Depressive Disorder	n	n	n	n	n	n	n	y	n		10.1007/s00127-016-1227-2
mciver2018	McIver, Shane; Senior, Elizabeth; Francis, Zoe	2018	Healing Fears, Conquering Challenges: Narrative Outcomes From a Wilderness Therapy Program	n	n	n	n	n	n	n	y	n		10.1007/s10071-016-1068-0
mcmichael2011	McMichael AJ, Lindgren E.	2011	Climate change: present and future risks to health, and necessary responses	n	n	n	n	n	n	n	y	n		10.1136/jech-2019-212451
mcmichael2011a	McMichael AJ.	2011	Drought, drying and mental health: lessons from recent experiences for future risk-lessening policies	n	n	n	n	n	n	n	y	n		10.3390/ijerph17072271
mcmichael2014	McMichael AJ.	2014	Climate Change and Children: Health Risks of Abatement Inaction, Health Gains from Action	n	n	n	n	n	n	n	y	n		10.1016/j.ssresearch.2012.12.011
mcneill2016	McNeill IM, Dunlop PD.	2016	Development and preliminary validation of the Constructive and Unconstructive Worry Questionnaire: A measure of individual differences in constructive versus unconstructive worry	n	n	n	n	n	n	n	y	n		10.1080/20008198.2017.1344079
mcshane2018	McShane, Katie	2018	LOVING AN UNFAMILIAR WORLD DEMENTIA, MENTAL ILLNESS, AND CLIMATE CHANGE	n	n	n	n	n	n	n	y	n		10.1016/j.rmed.2017.07.014
mcwhinney2016	McWhinney SR, Tremblay A, Chevalier TM, Lim VK, Newman AJ.	2016	Using CForest to Analyze Diffusion Tensor Imaging Data: A Study of White Matter Integrity in Healthy Aging	n	n	n	n	n	n	n	y	n		10.1002/ana.24080
mei2020	Mei WB, Hsu CY, Ou SJ.	2020	Research on Evaluation Indexes and Weights of the Aging-Friendly Community Public Environment under the Community Home-Based Pension Model	n	n	n	n	n	n	n	y	n		x
meilianda2017	Meilianda, E.; Munadi, K.; Azmeri; Safrida; Direzkia, Y.; Syamsidik; Oktari, R. S.	2017	Assessment of post-tsunami disaster recovery of Banda Aceh city of Indonesia as window of opportunities for sustainable development	n	n	n	n	n	n	n	y	n		10.1111/1467-9566.12563
michalopoulos2017	Michalopoulos LT, Baca-Atlas SN, Simona SJ, Jiwatram-Negr??n T, Ncube A, Chery MB.	2017	"Life at the River is a Living Hell:" a qualitative study of trauma, mental health, substance use and HIV risk behavior among female fish traders from the Kafue Flatlands in Zambia	n	n	n	n	n	n	n	y	n		10.1121/1.4964506
michelozzi2014	Michelozzi P, de' Donato F.	2014	[Climate changes, floods, and health consequences]	n	n	n	n	n	n	n	y	n		10.1353/ncf.2014.0023
midouhas2019	Midouhas E, Kokosi T, Flouri E.	2019	Neighbourhood-level air pollution and greenspace and inflammation in adults	n	n	n	n	n	n	n	y	n		10.1007/s10393-018-1339-0
mierau2020	Mierau JO, Kann-Weedage D, Hoekstra PJ, Spiegelaar L, Jansen DEMC, Vermeulen KM, Reijneveld SA, van den Hoofdakker BJ, Buskens E, van den Akker-van Marle ME, Dirksen CD, Groenman AP.	2020	Assessing quality of life in psychosocial and mental health disorders in children: a comprehensive overview and appraisal of generic health related quality of life measures	n	n	n	n	n	n	n	y	n		10.1016/j.envres.2014.03.014
miles2012	Miles, Rebecca; Coutts, Christopher; Mohamadi, Asal	2012	Neighborhood Urban Form, Social Environment, and Depression	n	n	n	n	n	n	n	y	n		10.1111/j.1440-1584.2011.01217.x
milligan2015	Milligan, C.; Payne, S.; Bingley, A.; Cockshott, Z.	2015	Place and wellbeing: shedding light on activity interventions for older men	n	n	n	n	n	n	n	y	n		10.5694/mja17.01200
mills2013	Mills PD, King LA, Watts BV, Hemphill RR.	2013	Inpatient suicide on mental health units in Veterans Affairs (VA) hospitals: avoiding environmental hazards	n	n	n	n	n	n	n	y	n		10.1038/s41398-019-0555-x
mills2015	Mills, China	2015	The Psychiatrization of Poverty: Rethinking the Mental Health-Poverty Nexus	n	n	n	n	n	n	n	y	n		10.22365/jpsych.2019.301.58
mills2019	Mills, Laura; Dionne, Alexandre; Bingley, Jennifer; Watson, Shelley L.	2019	Stumbling Along, Walking on Eggshells, and Vicious Circles: What Happens While Families Wait for Youth Substance Use Treatment	n	n	n	n	n	n	n	y	n		10.1080/14780887.2019.1677834
milner2014	Milner, Erin; Fiorella, Kathryn; Hickey, Matthew; Salmen, Charles; Omollo, Dan; Mattah, Brian; Magerenge, Richard; Brashares, Justin; Fernald, Lia	2014	Household food insecurity associated with child cognitive development in a rural Kenyan community on Lake Victoria	n	n	n	n	n	n	n	y	n		10.1007/978-981-10-0207-6_27
milojevic2017	Milojevic A, Armstrong B, Wilkinson P.	2017	Mental health impacts of flooding: a controlled interrupted time series analysis of prescribing data in England	n	n	n	n	n	n	n	y	n		10.1007/s10339-012-0524-2
min2017	Min KB, Kim HJ, Kim HJ, Min JY.	2017	Parks and green areas and the risk for depression and suicidal indicators	n	n	n	n	n	n	n	y	n		10.1177/1049731515579280
min2018	Min JY, Kim HJ, Min KB.	2018	Long-term exposure to air pollution and the risk of suicide death: A population-based cohort study	n	n	n	n	n	n	n	y	n		10.1136/bmjopen-2019-030075
min2018a	Min JY, Min KB.	2018	Night noise exposure and risk of death by suicide in adults living in metropolitan areas	n	n	n	n	n	n	n	y	n		10.1080/10481885.2015.991245
min2018b	Min JY, Min KB.	2018	Outdoor light at night and the prevalence of depressive symptoms and suicidal behaviors: A cross-sectional study in a nationally representative sample of Korean adults	n	n	n	n	n	n	n	y	n		10.1186/s13030-018-0126-z
min2019	Min M, Shi T, Ye P, Wang Y, Yao Z, Tian S, Zhang Y, Liang M, Qu G, Bi P, Duan L, Sun Y.	2019	Effect of apparent temperature on daily emergency admissions for mental and behavioral disorders in Yancheng, China: a time-series study	n	n	n	n	n	n	n	y	n		10.4061/2011/431320
minakshi2020	Minakshi; Joshi, P. C.; Kumar, Rahul	2020	Mental Health Problems in Wake of Disaster: A Gendered Perspective	n	n	n	n	n	n	n	y	n		10.1155/2013/892072
mindell2011	Mindell, Jennifer S.; Cohen, Judith M.; Watkins, Stephen; Tyler, Nicholas	2011	Synergies between low-carbon and healthy transport policies	n	n	n	n	n	n	n	y	n		10.2105/AJPH.2018.304680
minden2011	Minden K, Yamada S.	2011	Waiting for what? An inquiry into the fundamental questions of how to fix adolescent mental health care	n	n	n	n	n	n	n	y	n		10.1007/s00702-019-02121-w
minh2020	Minh-Hoang Nguyen; Manh-Tung Ho; Viet-Phuong La; Quynh-Yen Thi Nguyen; Manh-Toan Ho; Thu-Trang Vuong; Tam-Tri Le; Manh-Cuong Nguyen; Quan-Hoang Vuong	2020	A Scientometric Study on Depression among University Students in East Asia: Research and System Insufficiencies?	n	n	n	n	n	n	n	y	n		10.1097/NMD.0000000000000284
misiak2020	Misiak B.	2020	Air pollution and mental health: Moving the field forward	n	n	n	n	n	n	n	y	n		10.1016/j.dhjo.2013.07.002
mitchell2013	Mitchell R.	2013	Is physical activity in natural environments better for mental health than physical activity in other environments?	n	n	n	n	n	n	n	y	n		10.1162/ASEP_a_00696
mitra2014a	Mitra S, Kavoor AR.	2014	Psychiatry in 21(st) century: The road ahead	n	n	n	n	n	n	n	y	n		10.1016/j.envint.2018.10.026
mmako2019	Mmako NJ, Capetola T, Henderson-Wilson C.	2019	Sowing social inclusion for marginalised residents of a social housing development through a community garden	n	n	n	n	n	n	n	y	n		10.1371/journal.pone.0183182
mmako2020	Mmako NJ, Courtney-Pratt H, Marsh P.	2020	Green spaces, dementia and a meaningful life in the community: A mixed studies review	n	n	n	n	n	n	n	y	n		10.3390/brainsci8100188
moberg2019	Moberg C, Niles A, Beermann D.	2019	Guided Self-Help Works: Randomized Waitlist Controlled Trial of Pacifica, a Mobile App Integrating Cognitive Behavioral Therapy and Mindfulness for Stress, Anxiety, and Depression	n	n	n	n	n	n	n	y	n		10.1126/sciadv.aaw2685
mohammad2017	Mohammad, Nor Hazlina; Abdullah, Mohammad Nasir; Razi, Nor FaezahMohd; Ismail, Adriana	2017	Measuring HRQoL By Comparing the Perception of Air Quality Among Residents in Selangor	n	n	n	n	n	n	n	y	n		10.1371/currents.dis.57d98a902a326361d88d54521e68b016
molina2019	Molina-Sotomayor E, Gonz?Ýlez Orb M, Pradas de la Fuente F, Carozzi Figueroa G, S?Ýnchez-Oliver AJ, Gonz?Ýlez-Jurado JA.	2019	Effects of Cardiorespiratory Exercise on Cognition in Older Women Exposed to Air Pollution	n	n	n	n	n	n	n	y	n		10.3928/02793695-20141201-01
monsour2012	Monsour BB, Johnston JM, Hennessy TW, Schmidt MI, Krieger N.	2012	Visions for the 20th International Epidemiological Association's World Congress of Epidemiology (WCE 2014)	n	n	n	n	n	n	n	y	n		10.1111/inm.12673
moosavi2019	Moosavi S, Nwaka B, Akinjise I, Corbett SE, Chue P, Greenshaw AJ, Silverstone PH, Li XM, Agyapong VIO.	2019	Mental Health Effects in Primary Care Patients 18 Months After a Major Wildfire in Fort McMurray: Risk Increased by Social Demographic Issues, Clinical Antecedents, and Degree of Fire Exposure	n	n	n	n	n	n	n	y	n		10.1038/s41558-018-0092-2
morales2017	Morales S, Barros J, Ech?Ývarri O, Garc?ía F, Osses A, Moya C, Maino MP, Fischman R, N????ez C, Szmulewicz T, Tomicic A.	2017	Acute Mental Discomfort Associated with Suicide Behavior in a Clinical Sample of Patients with Affective Disorders: Ascertaining Critical Variables Using Artificial Intelligence Tools	n	n	n	n	n	n	n	y	n		10.1111/ecc.13095
moreira2020	Moreira, Helena; Vagos, Paula; Pereira, Joana; Fonseca, Ana; Canavarro, Maria Cristina; Rijo, Daniel	2020	Psychometric properties of the Portuguese version of the cognitive emotion regulation questionnaire-kids version (CERQ-kids) among a sample of children and adolescents exposed to wildfires	n	n	n	n	n	n	n	y	n		10.1186/s40862-017-0026-y
moriyama2013	Moriyama, Karin; Kaga, Makiko	2013	Mental healthcare efforts for the public after the Great East Japan Earthquake "Guide to Good Mental Health for Those Affected by Natural Disasters" published by the Cabinet Office	n	n	n	n	n	n	n	y	n		10.20506/rst.33.2.2307
morozov2018	Morozov PV.	2018	Mental health and urbanization: a Russian perspective	n	n	n	n	n	n	n	y	n		x
morris2013	Morris JG Jr, Grattan LM, Mayer BM, Blackburn JK.	2013	Psychological responses and resilience of people and communities impacted by the deepwater horizon oil spill	n	n	n	n	n	n	n	y	n		10.1007/s00404-011-1921-y
mortimer2010	Mortimer AR.	2010	Mental health response to acute stress following wilderness disaster	n	n	n	n	n	n	n	y	n		10.3390/ijerph13111105
moss2017	Moss KM, Simcock G, Cobham V, Kildea S, Elgbeili G, Laplante DP, King S.	2017	A potential psychological mechanism linking disaster-related prenatal maternal stress with child cognitive and motor development at 16 months: The QF2011 Queensland Flood Study	n	n	n	n	n	n	n	y	n		10.1016/S2468-2667(16)30005-6
motreff2013	Motreff Y, Pirard P, Goria S, Labrador B, Gourier-Fr?«ry C, Nicolau J, Le Tertre A, Chan-Chee C.	2013	Increase in psychotropic drug deliveries after the Xynthia storm, France, 2010	n	n	n	n	n	n	n	y	n		10.3389/fevo.2017.00016
moulin2019	Moulin TC, van Egmond LT.	2019	A possible role for pollutants in mental disorders via gut microbiota	n	n	n	n	n	n	n	y	n		10.1016/j.jrurstud.2014.03.006
mousavi2020	Mousavi A, Ardalan A, Takian A, Ostadtaghizadeh A, Naddafi K, Bavani AM.	2020	Climate change and health in Iran: a narrative review	n	n	n	n	n	n	n	y	n		10.4137/EHI.S24899
mueller2019	Mueller MAE, Flouri E, Kokosi T.	2019	The role of the physical environment in adolescent mental health	n	n	n	n	n	n	n	y	n		x
muhammad2018	Muhammad M, De Loney EH, Brooks CL, Assari S, Robinson D, Caldwell CH.	2018	"I think that's all a lieÈÃ¬I think It's genocide": Applying a Critical Race Praxis to Youth Perceptions of Flint Water Contamination	n	n	n	n	n	n	n	y	n		10.3390/ijerph120606542
mulchandani2019	Mulchandani R, Smith M, Armstrong B; English National Study of Flooding and Health Study Group, Beck CR, Oliver I.	2019	Effect of Insurance-Related Factors on the Association between Flooding and Mental Health Outcomes	n	n	n	n	n	n	n	y	n		10.3389/fpsyg.2018.01389
mulchandani2020	Mulchandani R, Armstrong B, Beck CR, Waite TD, Aml??t R, Kovats S, Leonardi G, Rubin GJ, Oliver I.	2020	The English National Cohort Study of Flooding & Health: psychological morbidity at three years of follow up	n	n	n	n	n	n	n	y	n		10.3390/electronics9030419
mullins2019	Mullins JT, White C.	2019	Temperature and mental health: Evidence from the spectrum of mental health outcomes	n	n	n	n	n	n	n	y	n		10.3389/fpsyg.2019.02149
mumm2017	Mumm R, Diaz-Monsalve S, H?±nselmann E, Freund J, Wirsching M, G?±rtner J, Gminski R, V?┬gtlin K, K?┬rner M, Zirn L, Wittwer-Backofen U, Oni T, Kroeger A.	2017	Exploring urban health in Cape Town, South Africa: an interdisciplinary analysis of secondary data	n	n	n	n	n	n	n	y	n		10.1371/journal.pone.0223685
mundt2011	Mundt CH, Hoffmann K, Wilmanns J.	2011	[Karl Wilmanns' theoretical contributions and his clinical practice. What does it mean for contemporary psychiatry?]	n	n	n	n	n	n	n	y	n		10.1166/jmihi.2017.2064
munro2017	Munro A, Kovats RS, Rubin GJ, Waite TD, Bone A, Armstrong B; English National Study of Flooding and Health Study Group.	2017	Effect of evacuation and displacement on the association between flooding and mental health outcomes: a cross-sectional analysis of UK survey data	n	n	n	n	n	n	n	y	n		x
munroe2012	Munroe, Robert L.; Gauvain, Mary	2012	Exposure to open-fire cooking and cognitive performance in children	n	n	n	n	n	n	n	y	n		10.3171/2020.1.SPINE191288
murawiec2013	Murawiec S, Britmann J, Krysta K.	2013	Different facets of schizophrenia illustrated by the analysis of the homes of three patients diagnosed with schizophrenia	n	n	n	n	n	n	n	y	n		10.1017/S0007114520000926
murphy2019	Murphy, Rebecca; Keogh, Brian; Higgins, Agnes	2019	Erosion of Meaning in Life: African Asylum Seekers' Experiences of Seeking Asylum in Ireland	n	n	n	n	n	n	n	y	n		x
murugananthan2017	Murugananthan, V.; Kumar, B. L. Shiva	2017	Educational Data Mining Life Cycle Model for Student Mental Healthcare and Education in Malaysia and India	n	n	n	n	n	n	n	y	n		10.1186/s12940-019-0543-x
mutz2016	Mutz M, M??ller J.	2016	Mental health benefits of outdoor adventures: Results from two pilot studies	n	n	n	n	n	n	n	y	n		10.15171/ijoem.2018.1375
myers2016a	Myers NA.	2016	Recovery stories: An anthropological exploration of moral agency in stories of mental health recovery	n	n	n	n	n	n	n	y	n		10.1186/s13019-020-01117-y
naal2020	Naal, Hady; Whaibeh, Emile; Mahmoud, Hossam	2020	Guidelines for primary health care-based telemental health in a low-to middle-income country: the case of Lebanon	n	n	n	n	n	n	n	y	n		10.1016/j.jenvp.2011.08.008
nahar2014	Nahar N, Blomstedt Y, Wu B, Kandarina I, Trisnantoro L, Kinsman J.	2014	Increasing the provision of mental health care for vulnerable, disaster-affected people in Bangladesh	n	n	n	n	n	n	n	y	n		10.1016/S2542-5196(17)30047-5
nakao2016	Nakao M, Yamauchi K, Ishihara Y, Solongo B, Ichinnorov D, Breugelmans R.	2016	Validation of the Mongolian version of the SF-36v2 questionnaire for health status assessment of Mongolian adults	n	n	n	n	n	n	n	y	n		10.1016/j.puhe.2010.09.005
nakao2018	Nakao M, Ishihara Y, Kim CH, Hyun IG.	2018	The Impact of Air Pollution, Including Asian Sand Dust, on Respiratory Symptoms and Health-related Quality of Life in Outpatients With Chronic Respiratory Disease in Korea: A Panel Study	n	n	n	n	n	n	n	y	n		10.1111/j.1469-1809.2009.00550.x
nararro2016	Nararro-Haro MV, Hoffman HG, Garcia-Palacios A, Sampaio M, Alhalabi W, Hall K, Linehan M.	2016	The Use of Virtual Reality to Facilitate Mindfulness Skills Training in Dialectical Behavioral Therapy for Borderline Personality Disorder: A Case Study	n	n	n	n	n	n	n	y	n		10.1001/jamanetworkopen.2018.0298
nazilah2019	Nazilah, A.; Ibrahim, Raja Zirwatul Aida Raja; Dagang, Mazidah; Rohaizad, Nor Aizal Akmal; Ibrahim, Che Wan Ida Rahimah Che Wan; Norillah, A.	2019	Validation of e-psychological instrument for flood victims version-II	n	n	n	n	n	n	n	y	n		x
nazimek2012	Nazimek JM, Hunter MD, Woodruff PW.	2012	Auditory hallucinations: expectation-perception model	n	n	n	n	n	n	n	y	n		10.1152/jn.00373.2016
neff2018	Neff, Kristin D.; Long, Phoebe; Knox, Marissa C.; Davidson, Oliver; Kuchar, Ashley; Costigan, Andrew; Williamson, Zachary; Rohleder, Nicolas; Toth-Kiraly, Istvan; Breines, Juliana G.	2018	The forest and the trees: Examining the association of self-compassion and its positive and negative components with psychological functioning	n	n	n	n	n	n	n	y	n		10.3390/ijerph16071174
negev2019	Negev M, Teschner N, Rosenthal A, Levine H, Lew-Levy C, Davidovitch N.	2019	Adaptation of health systems to climate-related migration in Sub-Saharan Africa: Closing the gap	n	n	n	n	n	n	n	y	n		10.1016/j.ijheh.2017.06.009
neldner2020	Neldner K, Reindl E, Tennie C, Grant J, Tomaselli K, Nielsen M.	2020	A cross-cultural investigation of young children's spontaneous invention of tool use behaviours	n	n	n	n	n	n	n	y	n		10.1016/j.ijheh.2014.08.002
nell2015	Nell, Werner; de Crom, Engela; Coetzee, Hendri; van Eeden, Elize	2015	The psychosocial well-being of a "forgotten" South African community: the case of Ndumo, KwaZulu-Natal	n	n	n	n	n	n	n	y	n		10.3766/jaaa.17139
ner2018	Ner, Rohit; Das, Dibya Prakash; Kumar, Rishabh; Garg, Shubhika	2018	Fuzzy Based Wellness Analyzer	n	n	n	n	n	n	n	y	n		10.1111/jon.12078
nesi2020	Nesi J.	2020	The Impact of Social Media on Youth Mental Health: Challenges and Opportunities	n	n	n	n	n	n	n	y	n		10.1088/1674-1056/27/11/118707
newson2020	Newson JJ, Hunter D, Thiagarajan TC.	2020	The Heterogeneity of Mental Health Assessment	n	n	n	n	n	n	n	y	n		10.1055/s-0039-1695788
ng2015	Ng FY, Wilson LA, Veitch C.	2015	Climate adversity and resilience: the voice of rural Australia	n	n	n	n	n	n	n	y	n		10.1186/s13063-020-04263-9
nguyen2011	Nguyen D.	2011	Acculturation and perceived mental health need among older Asian immigrants	n	n	n	n	n	n	n	y	n		10.2196/13023
ni2014	Ni H, Yang X, Fang C, Guo Y, Xu M, He Y.	2014	Data mining-based study on sub-mentally healthy state among residents in eight provinces and cities in China	n	n	n	n	n	n	n	y	n		10.3389/fpsyt.2018.00317
nicholas2017	Nicholas J, Huckvale K, Larsen ME, Basu A, Batterham PJ, Shaw F, Sendi S.	2017	Issues for eHealth in Psychiatry: Results of an Expert Survey	n	n	n	n	n	n	n	y	n		10.3928/02793695-20200406-01
nicholas2019	Nicholas, Patrice K.; Breakey, Suellen	2019	The Economics of Climate Change and the Intersection with Conflict, Violence, and Migration: Implications for the Nursing Profession	n	n	n	n	n	n	n	y	n		10.3390/ijerph16020245
nicolay2016	Nicolay, Michael; Brown, Lisa M.; Johns, Raine; Ialynytchev, Anna	2016	A study of heat related illness preparedness in homeless veterans	n	n	n	n	n	n	n	y	n		10.3923/pjbs.2010.956.960
nielsen2017	Nielsen E, Kirtley OJ, Townsend E.	2017	"Great powers and great responsibilities": A brief comment on "A brief mobile app reduces nonsuicidal and suicidal self-injury: Evidence from three randomized controlled trials" (Franklin et al., 2016)	n	n	n	n	n	n	n	y	n		10.1080/10937404.2016.1168730
nieuwenhuijsen2017	Nieuwenhuijsen MJ, Khreis H, Triguero-Mas M, Gascon M, Dadvand P.	2017	Fifty Shades of Green: Pathway to Healthy Urban Living	n	n	n	n	n	n	n	y	n		10.1371/journal.pone.0221977
nika2013	Nika S, Ploumpidis D, Zervas J, Papadimitriou GN, Tzinieri-Kokkosi M.	2013	[Depression and anxiety in mothers of children who grow up in an area with industrial pollution]	n	n	n	n	n	n	n	y	n		10.1080/19368623.2019.1660751
nitschke2014	Nitschke M, Tucker G, Simon DL, Hansen AL, Pisaniello DL.	2014	The link between noise perception and quality of life in South Australia	n	n	n	n	n	n	n	y	n		10.4103/1463-1741.97258
noguchi2012	Noguchi M, Moriya A, Fujita K.	2012	[Outreach services to clients with severe mental illness in the Okayama Prefectural Mental Health and Welfare Center]	n	n	n	n	n	n	n	y	n		10.1016/j.brainresrev.2009.12.002
nomikos2018	Nomikos, Ariane	2018	Place Matters	n	n	n	n	n	n	n	y	n		10.1007/s11136-018-2059-1
norra2012	Norra, C.; Ngoc, D. T. M.; Trang, P. T. K.; Lan, V. T. M.; Viet, P. H.; Norra, S.; Kunert, H. J.	2012	Mental health burden and neuropsychiatric deficits of chronic arsenic exposure: First results of the Vietnamese field study	n	n	n	n	n	n	n	y	n		10.1007/s11469-020-00363-4
norton2010	Norton, Christine Lynn	2010	Into the Wilderness-A Case Study: The Psychodynamics of Adolescent Depression and the Need for a Holistic Intervention	n	n	n	n	n	n	n	y	n		10.1038/s41598-019-44561-0
nosakhare2019	Nosakhare, Ehimwenma; Picard, Rosalind	2019	Probabilistic Latent Variable Modeling for Assessing Behavioral Influences on Well-Being	n	n	n	n	n	n	n	y	n		10.1016/j.socscimed.2010.10.024
nugent2019	Nugent N, Gaston SA, Perry J, Rung AL, Trapido EJ, Peters ES.	2019	PTSD symptom profiles among Louisiana women affected by the 2010 Deepwater Horizon Oil Spill: A latent profile analysis	n	n	n	n	n	n	n	y	n		10.1111/1552-6909.12466
nurse2010	Nurse J, Basher D, Bone A, Bird W.	2010	An ecological approach to promoting population mental health and well-being--a response to the challenge of climate change	n	n	n	n	n	n	n	y	n		10.9778/cmajo.20170047
nuvey2020	Nuvey FS, Kreppel K, Nortey PA, Addo-Lartey A, Sarfo B, Fokou G, Ameme DK, Kenu E, Sackey S, Addo KK, Afari E, Chibanda D, Bonfoh B.	2020	Poor mental health of livestock farmers in Africa: a mixed methods case study from Ghana	n	n	n	n	n	n	n	y	n		10.1155/2018/9653857
nuyts2019	Nuyts V, Nawrot TS, Scheers H, Nemery B, Casas L.	2019	Air pollution and self-perceived stress and mood: A one-year panel study of healthy elderly persons	n	n	n	n	n	n	n	y	n		10.1097/MD.0000000000020700
nyongesa2018	Nyongesa MK, Mwangala PN, Mwangi P, Kombe M, Newton CRJC, Abubakar AA.	2018	Neurocognitive and mental health outcomes and association with quality of life among adults living with HIV: a cross-sectional focus on a low-literacy population from coastal Kenya	n	y	n	n	n	n	n	y	n		10.7453/gahmj.2012.1.1.010
obaseki2017	Obaseki DO, Awopeju OF, Awokola BI, Adeniyi BO, Adefuye BO, Ozoh OB, Isiguzo GC, Amusa GA, Adewole OO, Erhabor GE.	2017	Domestic solid fuel combustion in an adult population in Nigeria: A cross sectional analysis of association with respiratory symptoms, quality of life and lung function	n	n	n	n	n	n	n	y	n		10.2196/14782
obradovich2018	Obradovich N, Migliorini R, Paulus MP, Rahwan I.	2018	Empirical evidence of mental health risks posed by climate change	n	n	n	n	n	n	n	y	n		10.3390/ijerph16214302
o'brien2011	O'Brien L, Burls A, Townsend M, Ebden M.	2011	Volunteering in nature as a way of enabling people to reintegrate into society	n	n	n	n	n	n	n	y	n		10.1038/s41598-020-61368-6
obrien2014	OBrien LV, Berry HL, Coleman C, Hanigan IC.	2014	Drought as a mental health exposure	n	n	n	n	n	n	n	y	n		10.1093/aje/kwx346
o'brien2018	O'Brien L.	2018	Engaging with and Shaping Nature: A Nature-Based Intervention for Those with Mental Health and Behavioural Problems at the Westonbirt Arboretum in England	n	n	n	n	n	n	n	y	n		10.3390/ijerph120404247
o'brien2019	O'Brien L.	2019	Carrying out Physical Activity as Part of the Active Forests Programme in England: What Encourages, Supports and Sustains Activity?-A Qualitative Study	n	n	n	n	n	n	n	y	n		10.1016/j.colegn.2010.09.004
o'brien2019a	O'Brien L, Ambrose-Oji B, Wheeler B.	2019	[Mental health and wellbeing: The contribution of trees and forests to diverse populations in Britain]	n	n	n	n	n	n	n	y	n		10.5055/jem.2014.0175
odeh2017	Odeh, Raymond; Guy, Charles L.	2017	Gardening for Therapeutic People-Plant Interactions during Long-Duration Space Missions	n	n	n	n	n	n	n	y	n		10.1017/dmp.2018.145
ogunbode2019	Ogunbode, Charles A.; Bohm, Gisela; Capstick, Stuart B.; Demski, Christina; Spence, Alexa; Tausch, Nicole	2019	The resilience paradox: flooding experience, coping and climate change mitigation intentions	n	n	n	n	n	n	n	y	n		10.1016/j.encep.2020.04.013
ojeda2016	Ojeda VD, Hiller SP, Hurst S, Jones N, McMenamin S, Burgdorf J, Gilmer TP.	2016	Implementation of Age-Specific Services for Transition-Age Youths in California	n	n	n	n	n	n	n	y	n		10.1080/14729679.2020.1730205
okaka2019	Okaka, Fredrick Okoth; Odhiambo, Beneah D. O.	2019	Households' perception of flood risk and health impact of exposure to flooding in flood-prone informal settlements in the coastal city of Mombasa	n	n	n	n	n	n	n	y	n		10.1037/a0038025
oken2018	Oken BS, Goodrich E, Klee D, Memmott T, Proulx J.	2018	Predictors of Improvements in Mental Health From Mindfulness Meditation in Stressed Older Adults	n	n	n	n	n	n	n	y	n		10.1037/xge0000330
okkels2018	Okkels N, Kristiansen CB, Munk-J?®rgensen P, Sartorius N.	2018	Urban mental health: challenges and perspectives	n	n	n	n	n	n	n	y	n		10.1109/EMBC.2018.8513220
okokon2018	Okokon EO, Yli-Tuomi T, Turunen AW, Tiittanen P, Juutilainen J, Lanki T.	2018	Traffic noise, noise annoyance and psychotropic medication use	n	n	n	n	n	n	n	y	n		10.1145/3117811.3131256
oku2015	Oku A, Oku O, Owoaje E, Monjok E.	2015	An Assessment of Mental Health Status of Undergraduate Medical Trainees in the University of Calabar, Nigeria: A Cross-Sectional Study	n	n	n	n	n	n	n	y	n		x
olesen2011	Olesen SC, Berry HL.	2011	Community participation and mental health during retirement in community sample of Australians	n	n	n	n	n	n	n	y	n		10.1073/pnas.1801528115
oliver2010	Oliver, Javier; Garcia, Begona	2010	LEARNING MODELS AND TEACHING PERSPECTIVES	n	n	n	n	n	n	n	y	n		10.1111/j.1753-6405.2012.00848.x
oliver2012	Oliver SJ, Sanders SJ, Williams CJ, Smith ZA, Lloyd-Davies E, Roberts R, Arthur C, Hardy L, Macdonald JH.	2012	Physiological and psychological illness symptoms at high altitude and their relationship with acute mountain sickness: a prospective cohort study	n	n	n	n	n	n	n	y	n		10.1080/09528822.2014.885201
olson2014	Olson J, Garofalo R.	2014	The peripubertal gender-dysphoric child: puberty suppression and treatment paradigms	n	n	n	n	n	n	n	y	n		x
olszewska2018	Olszewska, Agnieszka A.; Marques, Paulo F.; Ryan, Robert L.; Barbosa, Fernando	2018	What makes a landscape contemplative?	n	n	n	n	n	n	n	y	n		10.3389/fcell.2015.00037
olszewska2018b	Olszewska-Guizzo A, Escoffier N, Chan J, Puay Yok T.	2018	Window View and the Brain: Effects of Floor Level and Green Cover on the Alpha and Beta Rhythms in a Passive Exposure EEG Experiment	n	n	n	n	n	n	n	y	n		x
olszewska2020	Olszewska-Guizzo A, Sia A, Fogel A, Ho R.	2020	Can Exposure to Certain Urban Green Spaces Trigger Frontal Alpha Asymmetry in the Brain?-Preliminary Findings from a Passive Task EEG Study	n	n	n	n	n	n	n	y	n		10.1016/j.socscimed.2015.06.038
o'neill2016	O'Neill HK, McLean AJ, Kalis R, Shultz JM.	2016	Disaster averted: Community resilience in the face of a catastrophic flood	n	n	n	n	n	n	n	y	n		10.3390/ijerph15102214
ord2020	Ord????ez-Iriarte JM.	2020	[Mental health and environmental health. A prospective view. SESPAS Report 2020]	n	n	n	n	n	n	n	y	n		10.1080/07317115.2017.1398796
orozco2014	Orozco-Solis R, Sassone-Corsi P.	2014	Epigenetic control and the circadian clock: linking metabolism to neuronal responses	n	n	n	n	n	n	n	y	n		10.1037/tep0000062
orudjev2016	Orudjev, Nazim Y.; Lempert, Mikhail B.; Osaulenko, Ivan; Salnikova, Natalia A.; Kuzmichev, Andrew A.; Kravets, Alla G.	2016	Computer - Based Visual Analysis of Ecology Influence on Human Mental Health	n	n	n	n	n	n	n	y	n		10.3390/su11123317
otakpor2015	Otakpor AN, Akanni OO.	2015	A validational study of the Ironson-Woods Spirituality/Religiousness Index in Nigerian adolescents	n	n	n	n	n	n	n	y	n		10.1682/JRRD.2013.08.0190
othman2020	Othman, Noriah; Salleh, Mohd Zahid Mohd; Malekl, Nurhayati Abdul; Suddin, Leny Suzana	2020	Exploring Neuro-Landscape Theory Interfaced with Pro-Environment Behaviour Theory for Psychological Restoration of Low Income Group	n	n	n	n	n	n	n	y	n		10.1016/j.schres.2017.10.034
otiende2017	Otiende M, Abubakar A, Mochamah G, Walumbe D, Nyundo C, Doyle AM, Ross DA, Newton CR, Bauni E.	2017	Psychometric evaluation of the Major Depression Inventory among young people living in Coastal Kenya	n	n	n	n	n	n	n	y	n		10.1016/j.gloenvcha.2019.101994
otsuka2013	Otsuka K, Sakai A, Nakamura H, Akahira M.	2013	[Mental health activities following the Great East Japan Earthquake in the stricken coastal area of Iwate Prefecture]	n	n	n	n	n	n	n	y	n		10.1146/annurev-publhealth-040218-044106
oudin2016	Oudin A, Br?Ðb?±ck L, ?Óstr?┬m DO, Str?┬mgren M, Forsberg B.	2016	Association between neighbourhood air pollution concentrations and dispensed medication for psychiatric disorders in a large longitudinal cohort of Swedish children and adolescents	n	n	n	n	n	n	n	y	n		10.1080/23120053.2017.1335974
oudin2017	Oudin A, Forsberg B, Lind N, Nordin S, Oudin ?Óstr?┬m D, Sundstr?┬m A, Nordin M.	2017	Is Long-term Exposure to Air Pollution Associated with Episodic Memory? A Longitudinal Study from Northern Sweden	n	n	n	n	n	n	n	y	n		10.1080/00045608.2012.657496
oudin2017a	Oudin A, Br?Ðb?±ck L, Oudin ?Óstr?┬m D, Forsberg B.	2017	Air Pollution and Dispensed Medications for Asthma, and Possible Effect Modifiers Related to Mental Health and Socio-Economy: A Longitudinal Cohort Study of Swedish Children and Adolescents	n	n	n	n	n	n	n	y	n		10.1097/NAQ.0b013e3181f5649c
ouliaris2020	Ouliaris C, Sheahan L, George D.	2020	Preventing prejudice by preserving the spirit of mental health legislation during the COVID-19 national emergency	n	n	n	n	n	n	n	y	y		10.1088/1755-1315/39/1/012014
owoaje2016	Owoaje ET, Uchendu OC, Ajayi TO, Cadmus EO.	2016	A review of the health problems of the internally displaced persons in Africa	n	n	n	n	n	n	n	y	n		10.1007/s11629-019-5774-3
p2019	P?«rez-Aronsson A, Warner G, Sarkadi A, Osman F.	2019	"I'm a Mother Who Always Tries to Give My Children Hope"-Refugee Women's Experiences of Their Children's Mental Health	n	n	n	n	n	n	n	y	n		10.3389/fpsyg.2016.01167
pace2020	Pace J.	2020	"Place-ing" Dementia Prevention and Care in NunatuKavut, Labrador	n	n	n	n	n	n	n	y	n		10.1016/j.envres.2015.08.003
padhy2015	Padhy SK, Sarkar S, Panigrahi M, Paul S.	2015	Mental health effects of climate change	n	n	n	n	n	n	n	y	n		10.1097/EE9.0000000000000056
page2010	Page LA, Howard LM.	2010	The impact of climate change on mental health (but will mental health be discussed at Copenhagen?)	n	n	n	n	n	n	n	y	n		10.3390/ijerph13100954
page2012	Page LA, Hajat S, Kovats RS, Howard LM.	2012	Temperature-related deaths in people with psychosis, dementia and substance misuse	n	n	n	n	n	n	n	y	n		10.1007/s40572-018-0208-x
pagliaccio2020	Pagliaccio D, Herbstman JB, Perera F, Tang D, Goldsmith J, Peterson BS, Rauh V, Margolis AE.	2020	Prenatal exposure to polycyclic aromatic hydrocarbons modifies the effects of early life stress on attention and Thought Problems in late childhood	n	n	n	n	n	n	n	y	n		10.1186/1476-069X-10-39
pailler2018	Pailler, Sharon; Tsaneva, Magda	2018	The effects of climate variability on psychological well-being in India	n	n	n	n	n	n	n	y	n		10.1016/j.trd.2018.06.007
pal2020	Pal?┐ncia L, Le??n-G??mez BB, Bartoll X, Carrere J, D?íez E, Font-Ribera L, G??mez A, L??pez MJ, Mar?í-Dell'Olmo M, Mehdipanah R, Olabarr?ía M, P?«rez G, Puig-Ribera A, Rico M, Rojas-Rueda D, V?Ýsquez-Vera H, P?«rez K.	2020	Study Protocol for the Evaluation of the Health Effects of Superblocks in Barcelona: The "Salut Als Carrers" (Health in the Streets) Project	n	n	n	n	n	n	n	y	n		10.1017/S1092852920001303
palacios2020	Palacios Temprano J, Eichholtz P, Willeboordse M, Kok N.	2020	Indoor environmental quality and learning outcomes: protocol on large-scale sensor deployment in schools	n	n	n	n	n	n	n	y	n		10.1016/j.schres.2016.10.003
paley2013	Paley B, Lester P, Mogil C.	2013	Family systems and ecological perspectives on the impact of deployment on military families	n	n	n	n	n	n	n	y	n		10.1145/3293688.3293701
palinkas2020	Palinkas LA, Wong M.	2020	Global climate change and mental health	n	n	n	n	n	n	n	y	n		10.1055/s-0036-1584503
palsdottir2018	Palsdottir, Anna Maria; Stigsdotter, Ulrika K.; Persson, Dennis; Thorpert, Petra; Grahn, Patrik	2018	The qualities of natural environments that support the rehabilitation process of individuals with stress-related mental disorder in nature-based rehabilitation	n	n	n	n	n	n	n	y	n		10.1017/S1049023X12001082
pannese2016	Pannese, L.; Wortley, D.; Ascolese, A.	2016	Gamified Wellbeing for All Ages - How Technology and Gamification Can Support Physical and Mental Wellbeing in the Ageing Society	n	n	n	n	n	n	n	y	n		10.1186/s40621-017-0131-x
papanikolaou2011	Papanikolaou V, Adamis D, Mellon RC, Prodromitis G.	2011	Psychological distress following wildfires disaster in a rural part of Greece: a case-control population-based study	n	n	n	n	n	n	n	y	n		10.1016/j.neuroscience.2014.01.043
paranjothy2011	Paranjothy S, Gallacher J, Aml??t R, Rubin GJ, Page L, Baxter T, Wight J, Kirrage D, McNaught R, Palmer SR.	2011	Psychosocial impact of the summer 2007 floods in England	n	n	n	n	n	n	n	y	n		10.1016/j.trsl.2014.05.006
paraskevopoulou2018	Paraskevopoulou, Angeliki T.; Kamperi, Emmanouela; Demiris, Nikos; Economou, Marina; Theleritis, Christos; Kitsonas, Manos; Papageorgiou, Charalabos	2018	The impact of seasonal colour change in planting on patients with psychotic disorders using biosensors	n	n	n	n	n	n	n	y	n		x
park2017	Park J, Chung S, Lee J, Sung JH, Cho SW, Sim CS.	2017	Noise sensitivity, rather than noise level, predicts the non-auditory effects of noise in community samples: a population-based survey	n	n	n	n	n	n	n	y	n		10.21037/tau.2016.08.12
park2018	Park C, Sim CS, Sung JH, Lee J, Ahn JH, Choe YM, Park J.	2018	Low Income as a Vulnerable Factor to the Effect of Noise on Insomnia	n	n	n	n	n	n	n	y	n		10.3233/WOR-2012-0393-1832
parker2014	Parker W, Parker V, Parker G, Parker A.	2014	'Acoustic shock': a new occupational disease? observations from clinical and medico-legal practice	n	n	n	n	n	n	n	y	n		10.1093/jrs/fey027
parker2019a	Parker CL, Wellbery CE, Mueller M.	2019	The Changing Climate: Managing Health Impacts	n	n	n	n	n	n	n	y	n		10.1017/S1352465817000212
parkinson2013	Parkinson AJ.	2013	The Arctic Human Health Initiative: a legacy of the International Polar Year 2007-2009	n	n	n	n	n	n	n	y	n		10.1088/1748-9326/ab5039
parra2018	Parra A, Maschi G.	2018	Attributional Biases in Psychiatric Patients, a Religious, and a Control Group in the Assessment of a Hallucinatory Experience: The "White Christmas Test"	n	n	n	n	n	n	n	y	n		10.3390/ijerph14010097
parry2019	Parry L, Radel C, Adamo SB, Clark N, Counterman M, Flores-Yeffal N, Pons D, Romero-Lankao P, Vargo J.	2019	The (in)visible health risks of climate change	n	n	n	n	n	n	n	y	n		10.18553/jmcp.2016.22.11.1285
pasanen2014	Pasanen TP, Tyrv?±inen L, Korpela KM.	2014	The relationship between perceived health and physical activity indoors, outdoors in built environments, and outdoors in nature	n	n	n	n	n	n	n	y	n		x
pasanen2019	Pasanen TP, White MP, Wheeler BW, Garrett JK, Elliott LR.	2019	Neighbourhood blue space, health and wellbeing: The mediating role of different types of physical activity	n	n	n	n	n	n	n	y	n		10.3346/jkms.2018.33.e314
pascua2017	Pascua, Pua'ala; McMillen, Heather; Ticktin, Tamara; Vaughan, Mehana; Winter, Kawika B.	2017	Beyond services: A process and framework to incorporate cultural, genealogical, place-based, and indigenous relationships in ecosystem service assessments	n	n	n	n	n	n	n	y	n		10.1007/s11920-018-0974-z
pashkov2019	Pashkov VM, Trotska MV.	2019	Natural environment as component of public health: some aspects of its legal regulation	n	n	n	n	n	n	n	y	n		10.1080/0145935X.2017.1297703
pastor2015	Pastor-Mallol, Estanislao; Santo-Rane, Edith	2015	The ability to manage self-proposed projects between 1;3 and 2;0 years old: a study of inhibition and resistance to interference	n	n	n	n	n	n	n	y	n		10.1016/j.jep.2020.112576
pati2019	Pati S, Sinha R, Mahapatra P.	2019	Non-communicable Disease Risk Reduction Teaching in India: A Curricular Landscape	n	n	n	n	n	n	n	y	n		10.1017/dmp.2014.53
patil2015	Patil, Crystal L.; Maripuu, Tiina; Hadley, Craig; Sellen, Daniel W.	2015	Identifying Gaps in Health Research among Refugees Resettled in Canada	n	n	n	n	n	n	n	y	n		10.2105/AJPH.2017.303877
patrick2011	Patrick R, Capetola T.	2011	It's here! Are we ready? Five case studies of health promotion practices that address climate change from within Victorian health care settings	n	n	n	n	n	n	n	y	n		10.1038/s41370-018-0017-1
patten2014	Patten SB, Williams JV, Lavorato DH, Fiest KM, Bulloch AG, Wang J.	2014	Changing perceptions of mental health in Canada	n	n	n	n	n	n	n	y	n		x
patz2014	Patz JA, Frumkin H, Holloway T, Vimont DJ, Haines A.	2014	Climate change: challenges and opportunities for global health	n	n	n	n	n	n	n	y	n		10.2503/jjshs1.79.200
paul2019a	Paul KC, Haan M, Mayeda ER, Ritz BR.	2019	Ambient Air Pollution, Noise, and Late-Life Cognitive Decline and Dementia Risk	n	n	n	n	n	n	n	y	n		x
paul2020	Paul KC, Haan M, Yu Y, Inoue K, Mayeda ER, Dang K, Wu J, Jerrett M, Ritz B.	2020	Traffic-Related Air Pollution and Incident Dementia: Direct and Indirect Pathways Through Metabolic Dysfunction	n	n	n	n	n	n	n	y	n		10.2478/s13382-014-0252-1
pawlaczyk2014	Pawlaczyk-?³uszczy?õska M, Dudarewicz A, Zaborowski K, Zamojska-Daniszewska M, Waszkowska M.	2014	Evaluation of annoyance from the wind turbine noise: a pilot study	n	n	n	n	n	n	n	y	n		10.2503/jjshs1.80.96
pazzaglia2013	Pazzaglia AM, Dube C, Rotello CM.	2013	A critical comparison of discrete-state and continuous models of recognition memory: implications for recognition and beyond	n	n	n	n	n	n	n	y	n		10.12865/CHSJ.40.03.04
peacock2017	Peacock-Chambers E, Del Canto P, Ahlers D, Valdivia Peralta M, Palfrey J.	2017	School-Based Disaster Recovery: Promotion of Children's Mental Health Over the Long Haul	n	n	n	n	n	n	n	y	n		10.1016/j.apacoust.2020.107245
pearce2015	Pearce, Meryl; Eagle, Lynne; Low, David; Schurmann, Andrea	2015	CUT FROM 'COUNTRY': THE IMPACT OF CLIMATE CHANGE ON THE MENTAL HEALTH OF ABORIGINAL PASTORALISTS	n	n	n	n	n	n	n	y	n		10.3233/JCM-193866
pearson2013	Pearson, D.	2013	Health Benefits from Urban Agriculture Using Organic Methods	n	n	n	n	n	n	n	y	n		10.1146/annurev-psych-010419-051101
pearson2019a	Pearson AL, Shortridge A, Delamater PL, Horton TH, Dahlin K, Rzotkiewicz A, Marchiori MJ.	2019	Effects of freshwater blue spaces may be beneficial for mental health: A first, ecological study in the North American Great Lakes region	n	n	n	n	n	n	n	y	n		10.3390/ijerph17020393
pedata2014	Pedata P, Grella R, Lamberti M, Bergamasco N.	2014	[Using the Mini-Mental State Examination (MMSE) for preliminary assessment of cognitive impairment in subjects exposed to air pollution with particulate matter]	n	n	n	n	n	n	n	y	n		10.1027/1618-3169/a000079
pedersen2012	Pedersen, Ingeborg; Martinsen, Egil W.; Berget, Bente; Braastad, Bjarne O.	2012	Farm Animal-Assisted Intervention for People with Clinical Depression: A Randomized Controlled Trial	n	n	n	n	n	n	n	y	n		10.1037/ser0000367
pedersen2015	Pedersen W, Von Soest T.	2015	Which substance is most dangerous? Perceived harm ratings among students in urban and rural Norway	n	n	n	n	n	n	n	y	n		10.1080/15374416.2013.764824
pendrey2020	Pendrey CGA, Beaton L, Kneebone JA.	2020	General practice in the era of planetary health: Responding to the climate health emergency	n	n	n	n	n	n	n	y	n		10.1162/artl_a_00316
peng2015	Peng, Li-yun; Fan, Lei; Wang, Jian-ye	2015	Research on the Psychological Effect of Low-frequency Noise on People and its Evaluation Methods	n	n	n	n	n	n	n	y	n		10.1007/978-3-319-63709-9_7
penner2010	Penner, D'Ann R.	2010	Assault Rifles, Separated Families, and Murder in Their Eyes: Unasked Questions after Hurricane Katrina	n	n	n	n	n	n	n	y	n		10.1002/jts.22445
perimal2020	Perimal-Lewis L, Willams PAH.	2020	Campus Mental Well-Being: Opportunities for Digital Health	n	n	n	n	n	n	n	y	n		10.1037/amp0000581
perry2015	Perry Y, Murrihy RC, Varlow M, Dedousis-Wallace A, Ellis DM, Langdon R, Kidman AD.	2015	The development and implementation of a pilot CBT for early psychosis service: achievements and challenges	n	n	n	n	n	n	n	y	n		10.1007/s10113-014-0630-z
perticas2015	Perticas, Diana Claudia; Simut, Ramona Marinela	2015	ECONOMETRIC TESTING OF THE RELATIONSHIP BETWEEN THE CO2 LEVEL AND LIFE EXPECTANCY IN ROMANIA	n	n	n	n	n	n	n	y	n		10.1016/j.scitotenv.2020.140915
pesce2014	Pesce L, Kopp P.	2014	Iodide transport: implications for health and disease	n	n	n	n	n	n	n	y	n		10.1002/da.22668
pescosolido2015	Pescosolido BA, Martin JK, Olafsdottir S, Long JS, Kafadar K, Medina TR.	2015	The Theory of Industrial Society and Cultural Schemata: Does the "Cultural Myth of Stigma" Underlie the WHO Schizophrenia Paradox?	n	n	n	n	n	n	n	y	n		10.1037/a0021766
peterson2016	Peterson, Barbara; Kaas, Merrie	2016	Developing a Roadmap for Interprofessional Education in Community-Based Mental Health Sites: Learning the Landscape, Signposts, Detours, and Reaching the Destination	n	n	n	n	n	n	n	y	n		10.1080/2159676X.2018.1476010
petkova2014	Petkova EP, Morita H, Kinney PL.	2014	Health impacts of heat in a changing climate: how can emerging science inform urban adaptation planning?	n	n	n	n	n	n	n	y	n		10.3928/02793695-20170818-06
petrasek2015	Petrasek MacDonald J, Cunsolo Willox A, Ford JD, Shiwak I, Wood M; IMHACC Team; Rigolet Inuit Community Government.	2015	Protective factors for mental health and well-being in a changing climate: Perspectives from Inuit youth in Nunatsiavut, Labrador	n	n	n	n	n	n	n	y	n		10.1109/ASWEC.2018.00029
peyron2018	Peyron PA, Casper T, Mathieu O, Musizzano Y, Baccino E.	2018	Complex Suicide by Self-stabbing and Drowning: A Case Report and a Review of Literature	n	n	n	n	n	n	n	y	n		10.1109/HPCC/SmartCity/DSS.2018.00238
pham2015	Pham TD, Oyama-Higa M, Truong CT, Okamoto K, Futaba T, Kanemoto S, Sugiyama M, Lampe L.	2015	Computerized assessment of communication for cognitive stimulation for people with cognitive decline using spectral-distortion measures and phylogenetic inference	n	n	n	n	n	n	n	y	n		10.1016/j.jbtep.2018.07.004
phelps2019	Phelps, David; Kelly, Dana	2019	Overcoming drought vulnerability in rangeland communities: lessons from central-western Queensland	n	n	n	n	n	n	n	y	n		10.1007/s00127-019-01761-3
philippe2019	Philippe FL, Houle I.	2019	Cognitive integration of personal or public events affects mental health: Examining memory networks in a case of natural flooding disaster	n	n	n	n	n	n	n	y	n		10.2196/14993
phillips2013	Phillips, Judith; Walford, Nigel; Hockey, Ann; Foreman, Nigel; Lewis, Michael	2013	Older people and outdoor environments: Pedestrian anxieties and barriers in the use of familiar and unfamiliar spaces	n	n	n	n	n	n	n	y	n		10.1016/j.psychres.2018.12.050
phillips2013a	Phillips, J.; Cruz, A.; Cuadra, S.; Martinez, D.; Perdomo, M.	2013	PREDICTORS OF MENTAL HEALTH AFTER A DISASTER: A STUDY OF OLDER ADULTS FOUR YEARS AFTER THE 2007 SAN DIEGO COUNTY WILDFIRES	n	n	n	n	n	n	n	y	n		10.1002/nur.22020
phillips2015	Phillips L, Kemppainen JK, Mechling BM, MacKain S, Kim-Godwin Y, Leopard L.	2015	Eating disorders and spirituality in college students	n	n	n	n	n	n	n	y	n		10.1145/3078072.3084299
philo2014	Philo, Chris	2014	Same, Other, NIMBY and an asylum by the sea: revisiting 'Not at our seaside'	n	n	n	n	n	n	n	y	n		10.1007/s10597-009-9260-1
phua2015	Phua KL.	2015	Redesigning healthcare systems to meet the health challenges associated with climate change in the twenty-first century	n	n	n	n	n	n	n	y	n		10.1080/13504622.2016.1147529
piat2017	Piat, Myra; Seida, Kimberly; Sabetti, Judith; Padgett, Deborah	2017	(Em) placing recovery: Sites of health and wellness for individuals with serious mental illness in supported housing	n	n	n	n	n	n	n	y	n		10.1186/s13033-020-00351-0
pickard2015	Pickard H.	2015	Psychopathology and the Ability to Do Otherwise	n	n	n	n	n	n	n	y	n		10.21834/e-bpj.v5i13.2107
picking2015	Picking D, Delgoda R, Younger N, Germos?«n-Robineau L, Boulogne I, Mitchell S.	2015	TRAMIL ethnomedicinal survey in Jamaica	n	n	n	n	n	n	n	y	n		10.3390/ijerph16173102
picot2015	Picot SA, Glaetzer KM, Myhill KJ.	2015	Coordinating end of life care for individuals with a mental illness--A nurse practitioner collaboration	n	n	n	n	n	n	n	y	n		10.3389/frobt.2020.00005
pimentel2018	Pimentel, Daniel	2018	States of Mind, Body, and Planet: Improving the Human Condition through Virtual Experiences	n	n	n	n	n	n	n	y	n		10.3390/su11216097
pirrera2010	Pirrera S, De Valck E, Cluydts R.	2010	Nocturnal road traffic noise: A review on its assessment and consequences on sleep and health	n	n	n	n	n	n	n	y	n		10.1177/1557988319832121
pochee2017	Pochee, Hareth; Johnston, Innes	2017	Understanding design scales for a range of potential green infrastructure benefits in a London Garden City	n	n	n	n	n	n	n	y	n		10.1080/15332985.2015.1022244
poirel2011	Poirel, Nicolas; Vidal, Manuel; Pineau, Arlette; Lanoe, Celine; Leroux, Gaelle; Lubin, Amelie; Turbelin, Marie-Renee; Berthoz, Alain; Houde, Olivier	2011	Evidence of Different Developmental Trajectories for Length Estimation According to Egocentric and Allocentric Viewpoints in Children and Adults	n	n	n	n	n	n	n	y	n		10.1017/S1049023X19004990
polain2011	Polain JD, Berry HL, Hoskin JO.	2011	Rapid change, climate adversity and the next 'big dry': older farmers' mental health	n	n	n	n	n	n	n	y	n		10.1177/0272989X14559273
pollack2016	Pollack AA, Weiss B, Trung LT.	2016	Mental health, life functioning and risk factors among people exposed to frequent natural disasters and chronic poverty in Vietnam	n	n	n	n	n	n	n	y	n		10.1136/jech-2013-203120
pollock2019	Pollock N, Cunsolo A.	2019	Collaborative approaches to wellness and health equity in the Circumpolar North: Introduction to the Special Issue	n	n	n	n	n	n	n	y	n		10.1080/20477724.2016.1275463
pomerantz2010	Pomerantz AS, Shiner B, Watts BV, Detzer MJ, Kutter C, Street B, Scott D.	2010	The White River model of colocated collaborative care: A platform for mental and behavioral health care in the medical home	n	n	n	n	n	n	n	y	n		10.1016/j.ijheh.2012.05.002
poon2016	Poon LY, Tay E, Lee YP, Lee H, Verma S.	2016	Making in-roads across the youth mental health landscape in Singapore: the Community Health Assessment Team (CHAT)	n	n	n	n	n	n	n	y	n		10.1016/j.envres.2016.01.018
porta2016	Porta D, Narduzzi S, Badaloni C, Bucci S, Cesaroni G, Colelli V, Davoli M, Sunyer J, Zirro E, Schwartz J, Forastiere F.	2016	Air Pollution and Cognitive Development at Age 7 in a Prospective Italian Birth Cohort	n	n	n	n	n	n	n	y	n		10.1192/bjp.bp.117.202325
porter2019	Porter CM, Wechsler AM, Naschold F, Hime SJ, Fox L.	2019	Assessing health impacts of home food gardens with Wind River Indian Reservation families: protocol for a randomised controlled trial	n	n	n	n	n	n	n	y	n		10.1016/j.neuro.2016.06.004
post2010	Post RM.	2010	Mechanisms of illness progression in the recurrent affective disorders	n	n	n	n	n	n	n	y	n		10.3390/ijerph15081704
potvin2017	Potvin DA.	2017	Coping with a changing soundscape: avoidance, adjustments and adaptations	n	n	n	n	n	n	n	y	n		10.1515/reveh-2018-0045
poulsen2019	Poulsen AH, Raaschou-Nielsen O, Pe??a A, Hahmann AN, Nordsborg RB, Ketzel M, Brandt J, S?®rensen M.	2019	Impact of Long-Term Exposure to Wind Turbine Noise on Redemption of Sleep Medication and Antidepressants: A Nationwide Cohort Study	n	n	n	n	n	n	n	y	n		10.1016/j.envint.2015.03.007
powers2012	Powers JR, Loxton D, Baker J, Rich JL, Dobson AJ.	2012	Empirical evidence suggests adverse climate events have not affected Australian women's health and well-being	n	n	n	n	n	n	n	y	n		10.1289/ehp.1510363
powers2015	Powers JR, Dobson AJ, Berry HL, Graves AM, Hanigan IC, Loxton D.	2015	Lack of association between drought and mental health in a cohort of 45-61 year old rural Australian women	n	n	n	n	n	n	n	y	n		10.1016/j.uclim.2018.12.011
powers2019	Powers MCF, Engstrom S.	2019	Radical Self-Care for Social Workers in the Global Climate Crisis	n	n	n	n	n	n	n	y	n		10.1016/j.envres.2019.01.034
prescott2016	Prescott SL, Logan AC.	2016	Transforming Life: A Broad View of the Developmental Origins of Health and Disease Concept from an Ecological Justice Perspective	n	n	n	n	n	n	n	y	n		10.1016/j.sleh.2018.08.001
prescott2018	Prescott SL, Wegienka G, Logan AC, Katz DL.	2018	Dysbiotic drift and biopsychosocial medicine: how the microbiome links personal, public and planetary health	n	n	n	n	n	n	n	y	n		10.1080/09603123.2011.628642
prescott2019	Prescott SL, Hancock T, Bland J, van den Bosch M, Jansson JK, Johnson CC, Kondo M, Katz D, Kort R, Kozyrskyj A, Logan AC, Lowry CA, Nanan R, Poland B, Robinson J, Schroeck N, Sinkkonen A, Springmann M, Wright RO, Wegienka G.	2019	Eighth Annual Conference of inVIVO Planetary Health: From Challenges to Opportunities	n	n	n	n	n	n	n	y	n		10.1001/archinternmed.2011.683
prescott2020a	Prescott SL, Bland JS.	2020	Spaceship Earth Revisited: The Co-Benefits of Overcoming Biological Extinction of Experience at the Level of Person, Place and Planet	n	n	n	n	n	n	n	y	n		10.1017/dmp.2019.3
prohaska2019	Prohaska TR, Peters KE.	2019	Impact of Natural Disasters on Health Outcomes and Cancer Among Older Adults	n	n	n	n	n	n	n	y	n		10.4103/1463-1741.178478
provost2015	Provost, Emily Mower; Shangguan, Yuan; Busso, Carlos	2015	UMEME: University of Michigan Emotional McGurk Effect Data Set	n	n	n	n	n	n	n	y	n		10.1007/s00420-020-01548-z
psarros2015	Psarros, C.; Theleritis, C.; Economou, M.; Tzavara, Ch; Mantonakis, L.; Kioulos, K.; Roukas, D.; Bergiannaki, J. -D	2015	Insomnia is Related to the Early Development of PTSD in Victims of Wildfires	n	n	n	n	n	n	n	y	n		10.1186/s12911-018-0632-8
psarros2017	Psarros C, Theleritis C, Economou M, Tzavara C, Kioulos KT, Mantonakis L, Soldatos CR, Bergiannaki JD.	2017	Insomnia and PTSD one month after wildfires: evidence for an independent role of the "fear of imminent death"	n	n	n	n	n	n	n	y	n		10.1007/s43494-020-00025-z
psarros2018	Psarros C, Theleritis C, Kokras N, Lyrakos D, Koborozos A, Kakabakou O, Tzanoulinos G, Katsiki P, Bergiannaki JD.	2018	Personality characteristics and individual factors associated with PTSD in firefighters one month after extended wildfires	n	n	n	n	n	n	n	y	n		10.1186/s12889-016-3692-7
puiu2017	Puiu AA.	2017	Age-related cognitive decline as a function of daytime testing	n	n	n	n	n	n	n	y	n		10.1177/0020731415625254
pun2017a	Pun VC, Manjourides J, Suh H.	2017	Association of Ambient Air Pollution with Depressive and Anxiety Symptoms in Older Adults: Results from the NSHAP Study	n	n	n	n	n	n	n	y	n		10.1186/s12913-017-2453-3
pun2019	Pun VC, Manjourides J, Suh HH.	2019	Close proximity to roadway and urbanicity associated with mental ill-health in older adults	n	n	n	n	n	n	n	y	n		10.1089/jpm.2018.0148
punnoose2019	Punnoose, Varghese; Kumar, Sebind; Rajan, Varun	2019	Disasters And Mental Health - Lessons Learned The From Kerala Floods (Symposium)	n	n	n	n	n	n	n	y	n		10.1186/1471-2458-14-764
purcell2018	Purcell R, McGirr J.	2018	Rural health service managers' perspectives on preparing rural health services for climate change	n	n	n	n	n	n	n	y	n		10.1177/1010539519848280
putrik2015	Putrik P, de Vries NK, Mujakovic S, van Amelsvoort L, Kant I, Kunst AE, van Oers H, Jansen M.	2015	Living environment matters: relationships between neighborhood characteristics and health of the residents in a Dutch municipality	n	n	n	n	n	n	n	y	n		10.1089/jwh.2019.8029
qi2015	Qi B, Dong R, Li X, Gao W, Liu B.	2015	[The effect of improving the physical and mental health on different rehabilitation programs for post-linguistic cochlear implantees]	n	n	n	n	n	n	n	y	n		10.1007/s11414-020-09694-5
quoidbach2014	Quoidbach, Jordi; Gruber, June; Mikolajczak, Moira; Kogan, Alexsandr; Kotsou, Ilios; Norton, Michael I.	2014	Emodiversity and the Emotional Ecosystem	n	n	n	n	n	n	n	y	n		10.22605/RRH4020
rabelo2018	Rabelo Taveira, D. Londe; Verlaine Borges e Azevedo, P.; Ferreira Caixeta, L.	2018	Prevalence of mental health problems among isolated indigenous youth from Amazonian forest	n	n	n	n	n	n	n	y	n		10.3390/ijerph16091583
radcliff2018	Radcliff TA, Chu K, Der-Martirosian C, Dobalian A.	2018	A Model for Measuring Ambulatory Access to Care Recovery after Disasters	n	n	n	n	n	n	n	y	n		10.1371/journal.pone.0186342
raguenaud2012	Raguenaud ME, Germonneau P, Leseigneur J, Chavagnat JJ, Motreff Y, Vivier-Darrigol M, Pirard P.	2012	Epidemiological surveillance linked to an outreach psychological support program after the Xynthia storm in Charente-Maritime, France, 2010	n	n	n	n	n	n	n	y	n		x
ramchand2017	Ramchand R, Jaycox LH, Ebener PA.	2017	Suicide Prevention Hotlines in California: Diversity in Services, Structure, and Organization and the Potential Challenges Ahead	n	n	n	n	n	n	n	y	n		10.3109/09540261.2012.656304
ramchand2019	Ramchand R, Seelam R, Parks V, Ghosh-Dastidar B, Lee MR, Finucane M.	2019	Exposure to the Deepwater Horizon Oil Spill, Associated Resource Loss, and Long-Term Mental and Behavioral Outcomes	n	n	n	n	n	n	n	y	n		x
rana2013	Rana, C. S.; Tiwari, J. K.; Dangwal, L. R.; Gairola, S.	2013	Faith herbal healer knowledge document of Nanda Devi Biosphere Reserve, Uttarakhand, India	n	n	n	n	n	n	n	y	n		10.1177/1039856215590031
randolph2019	Randolph R, Chacko S, Morsch G.	2019	Disaster Medicine: Public Health Threats Associated With Disasters	n	n	n	n	n	n	n	y	n		10.1037/ort0000054
rasolofoson2020	Rasolofoson, Ranaivo A.; Ricketts, Taylor H.; Jacob, Anila; Johnson, Kiersten B.; Pappinen, Ari; Fisher, Brendan	2020	Forest Conservation: A Potential Nutrition-Sensitive Intervention in Low- and Middle-Income Countries	n	n	n	n	n	n	n	y	n		10.1007/s10567-013-0138-y
rawlett2019	Rawlett KE, N'Dri LA, dosReis S, Sibinga E.	2019	Perceived Needs for Adolescent Mental Health in an Urban Community	n	n	n	n	n	n	n	y	n		10.1007/s11469-016-9717-8
razjouyan2020	Razjouyan J, Najafi B, Horstman M, Sharafkhaneh A, Amirmazaheri M, Zhou H, Kunik ME, Naik A.	2020	Toward Using Wearables to Remotely Monitor Cognitive Frailty in Community-Living Older Adults: An Observational Study	n	n	n	n	n	n	n	y	n		10.2752/175303712X13316289505260
redshaw2013	Redshaw CH, Stahl-Timmins WM, Fleming LE, Davidson I, Depledge MH.	2013	Potential changes in disease patterns and pharmaceutical use in response to climate change	n	n	n	n	n	n	n	y	n		10.1080/1059924X.2019.1674230
reichert2020	Reichert M, Braun U, Lautenbach S, Zipf A, Ebner-Priemer U, Tost H, Meyer-Lindenberg A.	2020	Studying the impact of built environments on human mental health in everyday life: methodological developments, state-of-the-art and technological frontiers	n	n	n	n	n	n	n	y	n		10.1007/s10460-017-9801-0
reifels2014	Reifels L, Bassilios B, Spittal M, King K, Fletcher J, Pirkis J.	2014	Patterns and predictors of primary mental health service use following bushfire and flood disasters	n	n	n	n	n	n	n	y	n		x
reifels2015	Reifels L, Bassilios B, Spittal MJ, King K, Fletcher J, Pirkis J.	2015	Patterns and Predictors of Primary Mental Health Service Use Following Bushfire and Flood Disasters	n	n	n	n	n	n	n	y	n		10.1186/1756-0500-4-89
reindl2016	Reindl E, Beck SR, Apperly IA, Tennie C.	2016	Young children spontaneously invent wild great apes' tool-use behaviours	n	n	n	n	n	n	n	y	n		10.1111/j.1440-1584.2011.01244.x
ren2019	Ren T, Yu X, Yang W.	2019	Do cognitive and non-cognitive abilities mediate the relationship between air pollution exposure and mental health?	n	n	n	n	n	n	n	y	n		10.1386/ffc.4.1.75_1
rey2016	Rey GN, Aguilar PS, P?«rez FC, Orford J, Escudero GS, Sainz MT.	2016	[Cost-effectiveness of a brief intervention to support indigenous women in Hidalgo (Mexico) who live with alcohol abusers]	n	n	n	n	n	n	n	y	n		10.1016/j.scitotenv.2018.05.195
rezaei2014	Rezaei-Yazdi, Ali; Buckingham, Christopher D.	2014	Understanding Data Collection Behaviour of Mental Health Practitioners	n	n	n	n	n	n	n	y	n		10.1215/03616878-3802940
rhodes2017	Rhodes MG, de Vries MW.	2017	A Case for Open Network Health Systems: Systems as Networks in Public Mental Health	n	n	n	n	n	n	n	y	n		10.3390/diagnostics9010008
rice2016	Rice SM, McIver LJ.	2016	Climate change and mental health: Rationale for research and intervention planning	n	n	n	n	n	n	n	y	n		10.3390/jcm8020164
richardson2017	Richardson EA, Pearce J, Shortt NK, Mitchell R.	2017	The role of public and private natural space in children's social, emotional and behavioural development in Scotland: A longitudinal study	n	n	n	n	n	n	n	y	n		x
rigby2011	Rigby, Colin Wayne; Rosen, Alan; Berry, Helen Louise; Hart, Craig Richard	2011	If the land's sick, we're sick:* The impact of prolonged drought on the social and emotional well-being of Aboriginal communities in rural New South Wales	n	n	n	n	n	n	n	y	n		10.1377/hlthaff.2015.1653
riley2018	Riley E, Harris P, Kent J, Sainsbury P, Lane A, Baum F.	2018	Including Health in Environmental Assessments of Major Transport Infrastructure Projects: A Documentary Analysis	n	n	n	n	n	n	n	y	n		10.7860/JCDR/2018/31545.11941
ritchie2020	Ritchie A, Sautner B, Omege J, Denga E, Nwaka B, Akinjise I, Corbett SE, Moosavi S, Greenshaw A, Chue P, Li XM, Agyapong VIO.	2020	Long-Term Mental Health Effects of a Devastating Wildfire Are Amplified by Sociodemographic and Clinical Antecedents in College Students	n	n	n	n	n	n	n	y	n		10.1016/j.neuroimage.2009.08.019
rivas2019	Rivas I, Basaga??a X, Cirach M, L??pez-Vicente M, Suades-Gonz?Ýlez E, Garcia-Esteban R, ?³lvarez-Pedrerol M, Dadvand P, Sunyer J.	2019	Association between Early Life Exposure to Air Pollution and Working Memory and Attention	n	n	n	n	n	n	n	y	n		10.1016/j.neuroimage.2015.09.034
rivers2011	Rivers I.	2011	Morbidity among bystanders of bullying behavior at school: concepts, concerns, and clinical/research issues	n	n	n	n	n	n	n	y	n		10.1097/EDE.0000000000000549
roberts2015	Roberts, Catherine; Davies, Jason; Maggs, Richard G.	2015	Structured community activity for forensic mental health - a feasibility study	n	n	n	n	n	n	n	y	n		10.1136/bmjopen-2017-020907
roberts2018	Roberts, Adam C.; Christopoulos, George I.	2018	Comment on "Using functional Magnetic Resonance Imaging (fMRI) to analyze brain region activity when viewing landscapes"	n	n	n	n	n	n	n	y	n		10.1177/1359104513476719
roberts2019	Roberts S, Arseneault L, Barratt B, Beevers S, Danese A, Odgers CL, Moffitt TE, Reuben A, Kelly FJ, Fisher HL.	2019	Exploration of NO(2) and PM(2.5) air pollution and mental health problems using high-resolution data in London-based children from a UK longitudinal cohort study	n	n	n	n	n	n	n	y	n		10.1093/aje/kwu155
robinson2020	Robinson JM, Jorgensen A, Cameron R, Brindley P.	2020	Let Nature Be Thy Medicine: A Socioecological Exploration of Green Prescribing in the UK	n	n	n	n	n	n	n	y	n		10.1093/geronb/gbu064
robles2019	Robles B, Thomas CS, Lai ES, Kuo T.	2019	A Geospatial Analysis of Health, Mental Health, and Stressful Community Contexts in Los Angeles County	n	n	n	n	n	n	n	y	n		10.1017/dmp.2018.53
rock2020	Rock D, Cross SP.	2020	Regional planning for meaningful person-centred care in mental health: context is the signal not the noise	n	n	n	n	n	n	n	y	n		10.1037/pro0000192
rodr2020	Rodr?íguez-Ruiz JG, Galv?Ýn-Tejada CE, Zanella-Calzada LA, Celaya-Padilla JM, Galv?Ýn-Tejada JI, Gamboa-Rosales H, Luna-Garc?ía H, Magallanes-Quintanar R, Soto-Murillo MA.	2020	Comparison of Night, Day and 24 h Motor Activity Data for the Classification of Depressive Episodes	n	n	n	n	n	n	n	y	n		10.1093/emph/eoz038
rodrigues2016	Rodrigues, R.; Silva, L.; Souza, E.; Souza, A.; Brito, F.	2016	Performance evaluation in teaching environments on climate change	n	n	n	n	n	n	n	y	n		10.3390/ijerph16183256
rodriguez2015	Rodriguez, Manuel; Kohen, Raquel; Delval, Juan	2015	Children's and adolescents' thoughts on pollution: cognitive abilities required to understand environmental systems	n	n	n	n	n	n	n	y	n		10.1371/journal.pone.0119929
roe2011	Roe J, Aspinall P.	2011	The restorative benefits of walking in urban and rural settings in adults with good and poor mental health	n	n	n	n	n	n	n	y	n		10.1016/S2542-5196(17)30062-1
roe2011a	Roe, Jenny; Aspinall, Peter	2011	The restorative outcomes of forest school and conventional school in young people with good and poor behaviour	n	n	n	n	n	n	n	y	n		10.2174/1568026611313080004
rogerson2017	Rogerson M.	2017	Commentary: Environmental Influences on Elite Sport Athletes Well Being: From Gold, Silver, and Bronze to Blue, Green and Gold	n	n	n	n	n	n	n	y	n		10.1038/s41558-018-0128-7
rogerson2020	Rogerson M, Wood C, Pretty J, Schoenmakers P, Bloomfield D, Barton J.	2020	Regular Doses of Nature: The Efficacy of Green Exercise Interventions for Mental Wellbeing	n	n	n	n	n	n	n	y	n		10.1521/jscp.2015.34.9.809
rojas2019	Rojas, Juan C.; Sanchez, Nazly E.; Schneider, Ismael; Oliveira, Marcos L. S.; Teixeira, Elba C.; Silva, Luis F. O.	2019	Exposure to nanometric pollutants in primary schools: Environmental implications	n	n	n	n	n	n	n	y	n		10.1037/pas0000617
rolin2019	Rolin D, Fox I, Jain R, Cole SP, Tran C, Jain S.	2019	Wellness Interventions in Psychiatrically Ill Patients: Impact of WILD 5 Wellness, a Five-Domain Mental Health Wellness Intervention on Depression, Anxiety, and Wellness	n	n	n	n	n	n	n	y	n		10.1111/j.1440-1584.2012.01280.x
rose2019	Rose, Jeff	2019	Unsheltered Homelessness in Urban Parks: Perspectives on Environment, Health, and Justice in Salt Lake City, Utah	n	n	n	n	n	n	n	y	n		10.1177/026010601102000406
rosenberg2013	Rosenberg SP, Hickie IB.	2013	Making activity-based funding work for mental health	n	n	n	n	n	n	n	y	n		x
rossati2017	Rossati A.	2017	Global Warming and Its Health Impact	n	n	n	n	n	n	n	y	n		10.1176/appi.ps.201900273
roswall2015	Roswall N, H?®gh V, Envold-Bidstrup P, Raaschou-Nielsen O, Ketzel M, Overvad K, Olsen A, S?®rensen M.	2015	Residential exposure to traffic noise and health-related quality of life--a population-based study	n	n	n	n	n	n	n	y	n		10.1097/01.pra.0000396065.79719.1e
roy2015	Roy MJ, Costanzo M, Gill J, Leaman S, Law W, Ndiongue R, Taylor P, Kim HS, Bieler GS, Garge N, Rapp PE, Keyser D, Nathan D, Xydakis M, Pham D, Wassermann E.	2015	Predictors of Neurocognitive Syndromes in Combat Veterans	n	n	n	n	n	n	n	y	n		10.3389/fsufs.2020.00020
roysden2015	Roysden N, Wright A.	2015	Predicting Health Care Utilization After Behavioral Health Referral Using Natural Language Processing and Machine Learning	n	n	n	n	n	n	n	y	n		x
royuela2020	Royuela-Rico A.	2020	[Inbreeding and serious mental illness in the first Spanish Bourbons]	n	n	n	n	n	n	n	y	n		10.3389/fnut.2018.00095
rozenblatt2018	Rozenblatt, Daphne	2018	Work: Disease, Cure, and National Ethos in Modern Italy	n	n	n	n	n	n	n	y	n		10.1111/cdep.12235
rubanovich2017	Rubanovich CK, Mohr DC, Schueller SM.	2017	Health App Use Among Individuals With Symptoms of Depression and Anxiety: A Survey Study With Thematic Coding	n	n	n	n	n	n	n	y	n		x
rucci2012	Rucci P, Piazza A, Menchetti M, Berardi D, Fioritti A, Mimmi S, Fantini MP.	2012	Integration between Primary Care and Mental Health Services in Italy: Determinants of Referral and Stepped Care	n	n	n	n	n	n	n	y	n		10.4028/www.scientific.net/AMM.368-370.639
rudolph2019	Rudolph KE, Shev A, Paksarian D, Merikangas KR, Mennitt DJ, James P, Casey JA.	2019	Environmental noise and sleep and mental health outcomes in a nationally representative sample of urban US adolescents	n	n	n	n	n	n	n	y	n		10.3390/ijerph15040806
rudolphi2020	Rudolphi JM, Barnes KL.	2020	Farmers' Mental Health: Perceptions from a Farm Show	n	n	n	n	n	n	n	y	n		10.1093/jpepsy/jsz055
rugel2017	Rugel EJ, Henderson SB, Carpiano RM, Brauer M.	2017	Beyond the Normalized Difference Vegetation Index (NDVI): Developing a Natural Space Index for population-level health research	n	n	n	n	n	n	n	y	n		10.3389/fpsyt.2019.01017
rugel2019	Rugel EJ, Carpiano RM, Henderson SB, Brauer M.	2019	Exposure to natural space, sense of community belonging, and adverse mental health outcomes across an urban region	n	n	n	n	n	n	n	y	n		10.1007/s11097-017-9527-x
ruiz2018	Ruiz-Grao, M. C.; Hernandez-Martinez, A.; Garcia-Alcaraz, F.; Garcia-Moreno, M.; Amo-Saus, M. Ll.; Martinez-Esparcia, L.; Garcia-Lopez, A.; Molina-Alarcon, M.	2018	STUDY ABOUT NOISE LEVELS IN UNIVERSITY STUDENTS' LEISURE AREAS: A BARRIER AGAINST NOISE	n	n	n	n	n	n	n	y	n		10.1002/hbm.24192
rung2016	Rung AL, Gaston S, Oral E, Robinson WT, Fontham E, Harrington DJ, Trapido E, Peters ES.	2016	Depression, Mental Distress, and Domestic Conflict among Louisiana Women Exposed to the Deepwater Horizon Oil Spill in the WaTCH Study	n	n	n	n	n	n	n	y	n		10.1371/journal.pone.0177286
russell2017	Russell, Keith; Gillis, Harold L. (Lee)	2017	The Adventure Therapy Experience Scale: The Psychometric Properties of a Scale to Measure the Unique Factors Moderating an Adventure Therapy Experience	n	n	n	n	n	n	n	y	n		10.3389/fpsyt.2016.00172
ryan2019	Ryan BJ, Franklin RC, Burkle FM, Smith EC, Aitken P, Leggat PA.	2019	Determining Key Influences on Patient Ability to Successfully Manage Noncommunicable Disease After Natural Disaster	n	n	n	n	n	n	n	y	n		10.1192/bja.2018.34
ryder2012	Ryder AG, Chentsova-Dutton YE.	2012	Depression in cultural context: "Chinese somatization," revisited	n	n	n	n	n	n	n	y	n		x
saeb2017	Saeb S, Lattie EG, Kording KP, Mohr DC.	2017	Mobile Phone Detection of Semantic Location and Its Relationship to Depression and Anxiety	n	n	n	n	n	n	n	y	n		10.1007/s40828-017-0043-y
sahni2016	Sahni V, Scott AN, Beliveau M, Varughese M, Dover DC, Talbot J.	2016	Public health surveillance response following the southern Alberta floods, 2013	n	n	n	n	n	n	n	y	n		10.1007/978-3-319-32703-7_245
sakano2018	Sakano M, Snowden N.	2018	Paving the way for the future of child and adolescent mental health in Japan	n	n	n	n	n	n	n	y	n		10.1515/opag-2017-0001
sakhnini2018	Sakhnini, Nina; Yu, Ja Eun; Chattopadhyay, Debaleena	2018	myCityMeter: Helping Older Adults Manage the Environmental Risk Factors for Cognitive Impairment	n	n	n	n	n	n	n	y	n		10.1071/MA15008
sakhnini2018a	Sakhnini, Nina	2018	myCityMeter Wearable: Measuring the Environmental Risk Factors for Cognitive Impairment in Older Adults	n	n	n	n	n	n	n	y	n		10.1111/cag.12508
sakuma2015	Sakuma A, Takahashi Y, Ueda I, Sato H, Katsura M, Abe M, Nagao A, Suzuki Y, Kakizaki M, Tsuji I, Matsuoka H, Matsumoto K.	2015	Post-traumatic stress disorder and depression prevalence and associated risk factors among local disaster relief and reconstruction workers fourteen months after the Great East Japan Earthquake: a cross-sectional study	n	n	n	n	n	n	n	y	n		10.3389/fpubh.2019.00375
salgado2018	Salgado Roa, Jorge Alejandro; Leria Dulcic, Francisco Jose	2018	Coping strategies for stress and pathological symptoms in university students in the face of a mudslide disaster	n	n	n	n	n	n	n	y	n		10.1002/jts.22210
salvi2019	Salvi A, Salim S.	2019	Neurobehavioral Consequences of Traffic-Related Air Pollution	n	n	n	n	n	n	n	y	n		10.1186/1475-9276-12-57
samele2015	Samele C, Urqu?ía N.	2015	Psychiatric inpatient care: where do we go from here?	n	n	n	n	n	n	n	y	n		10.1002/eat.22180
sampson2017	Sampson N, Nassauer J, Schulz A, Hurd K, Dorman C, Ligon K.	2017	Landscape care of urban vacant properties and implications for health and safety: Lessons from photovoice	n	n	n	n	n	n	n	y	n		10.1093/asj/sjz262
sanguanklin2014	Sanguanklin N, McFarlin BL, Park CG, Giurgescu C, Finnegan L, White-Traut R, Engstrom JL.	2014	Effects of the 2011 flood in Thailand on birth outcomes and perceived social support	n	n	n	n	n	n	n	y	n		10.1016/j.ijdrr.2017.03.014
saniotis2010	Saniotis A, Irvine R.	2010	Climate change and the possible health effects on older Australians	n	n	n	n	n	n	n	y	n		10.1097/PRS.0000000000004123
sansom2017	Sansom G, Parras J, Parras A, Nieto Y, Arellano Y, Berke P, McDonald T, Shipp E, Horney JA.	2017	The Impacts of Exposure to Environmental Risk on Physical and Mental Health in a Small Geographic Community in Houston, TX	n	n	n	n	n	n	n	y	n		10.1111/nyas.13564
sanson2019	Sanson, Ann V.; Van Hoorn, Judith; Burke, Susie E. L.	2019	Responding to the Impacts of the Climate Crisis on Children and Youth	n	n	n	n	n	n	n	y	n		10.1016/j.envres.2020.109225
santillanes2019	Santillanes, Genevieve; Onigu-Otite, Edore; Tucci, Veronica; Moukaddam, Nidal	2019	Medical Clearance of Psychiatric Patients in the Emergency Department	n	n	n	n	n	n	n	y	n		10.1016/j.psychres.2020.112973
sargent2020	Sargent L, Nalls M, Amella EJ, Slattum PW, Mueller M, Bandinelli S, Tian Q, Swift-Scanlan T, Lageman SK, Singleton A.	2020	Shared mechanisms for cognitive impairment and physical frailty: A model for complex systems	n	n	n	n	n	n	n	y	n		10.1017/S1355617715001307
sarkar2013	Sarkar C, Gallacher J, Webster C.	2013	Urban built environment configuration and psychological distress in older men: results from the Caerphilly study	n	n	n	n	n	n	n	y	n		10.31128/AJGP-01-20-5207
sarkar2018	Sarkar C, Webster C, Gallacher J.	2018	Residential greenness and prevalence of major depressive disorders: a cross-sectional, observational, associational study of 94ÈÃÛ879 adult UK Biobank participants	n	n	n	n	n	n	n	y	n		10.1186/s13033-017-0159-x
sarris2014	Sarris J, O'Neil A, Coulson CE, Schweitzer I, Berk M.	2014	Lifestyle medicine for depression	n	n	n	n	n	n	n	y	n		10.1080/10503307.2020.1785037
sarris2019	Sarris J, de Manincor M, Hargraves F, Tsonis J.	2019	Harnessing the Four Elements for Mental Health	n	n	n	n	n	n	n	y	n		10.1080/13648470.2017.1317398
sass2017	Sass V, Kravitz-Wirtz N, Karceski SM, Hajat A, Crowder K, Takeuchi D.	2017	The effects of air pollution on individual psychological distress	n	n	n	n	n	n	n	y	n		10.1016/j.neurobiolaging.2012.05.001
satariano2019	Satariano, Bernadine	2019	Blue therapeutic spaces on islands: Coastal landscapes and their impact on the health and wellbeing of people in Malta	n	n	n	n	n	n	n	y	n		10.1016/j.psyneuen.2013.08.014
sattler2017	Sattler, David N.	2017	Climate Change and Extreme Weather Events: The Mental Health Impact	n	n	n	n	n	n	n	y	n		10.1001/jama.2010.869
schalinski2016	Schalinski I, Teicher MH, Nischk D, Hinderer E, M??ller O, Rockstroh B.	2016	Type and timing of adverse childhood experiences differentially affect severity of PTSD, dissociative and depressive symptoms in adult inpatients	n	n	n	n	n	n	n	y	n		10.1089/ham.2016.0137
schalinski2019	Schalinski I, Breinlinger S, Hirt V, Teicher MH, Odenwald M, Rockstroh B.	2019	Environmental adversities and psychotic symptoms: The impact of timing of trauma, abuse, and neglect	n	n	n	n	n	n	n	y	n		10.1016/j.bspc.2015.10.006
scharte2012	Scharte M, Bolte G.	2012	[Children of single mothers: health risks and environmental stress]	n	n	n	n	n	n	n	y	n		10.3928/02793695-20171024-02
schikowski2020	Schikowski T, Altu?â H.	2020	The role of air pollution in cognitive impairment and decline	n	n	n	n	n	n	n	y	n		10.1007/s11205-013-0428-2
schilling2015	Schilling S, Bustamante JA, Sala A, Acevedo C, Tapia E, Alvarado R, Sapag JC, Yang LH, Lukens E, Mascayano F, Cid P, Tapia T.	2015	Development of an intervention to reduce self-stigma in outpatient mental health service users in Chile	n	n	n	n	n	n	n	y	n		10.1080/08941920.2017.1422062
schmitz2019	Schmitz-Buhl M, Gairing SK, Rietz C, H?±ussermann P, Zielasek J, Gouzoulis-Mayfrank E.	2019	A retrospective analysis of determinants of involuntary psychiatric in-patient treatment	n	n	n	n	n	n	n	y	n		10.1080/15295192.2019.1556028
schneider2014	Schneider LA, Burns NR, Giles LC, Higgins RD, Nettelbeck TJ, Ridding MC, Pitcher JB.	2014	Cognitive abilities in preterm and term-born adolescents	n	n	n	n	n	n	n	y	n		10.1016/j.copsyc.2019.06.023
schneider2017	Schneider A, R??ckerl R, Breitner S, Wolf K, Peters A.	2017	Thermal Control, Weather, and Aging	n	n	n	n	n	n	n	y	n		10.1056/NEJMra1110827
scholz2019	Scholz B, Gordon S, Bocking J, Liggins J, Ellis P, Roper C, Platania-Phung C, Happell B.	2019	'There's just no flexibility': How space and time impact mental health consumer research	n	n	n	n	n	n	n	y	n		10.1016/j.idc.2011.05.008
schrader2013	Schrader S, Shattell M.	2013	"Cultural cognition": what mental health researchers and clinicians might learn from the climate change debate	n	n	n	n	n	n	n	y	n		10.1097/YCO.0000000000000296
schreckenberg2010	Schreckenberg D, Griefahn B, Meis M.	2010	The associations between noise sensitivity, reported physical and mental health, perceived environmental quality, and noise annoyance	n	n	n	n	n	n	n	y	n		10.15171/ijoem.2017.963
schulte2016	Schulte PA, Bhattacharya A, Butler CR, Chun HK, Jacklitsch B, Jacobs T, Kiefer M, Lincoln J, Pendergrass S, Shire J, Watson J, Wagner GR.	2016	Advancing the framework for considering the effects of climate change on worker safety and health	n	n	n	n	n	n	n	y	n		x
schultze2018	Schultze-Lutter F, Schmidt SJ, Theodoridou A.	2018	Psychopathology-a Precision Tool in Need of Re-sharpening	n	n	n	n	n	n	n	y	n		x
schulz2019	Schulz H, Karrasch S, B?┬lke G, Cyrys J, Hornberg C, Pickford R, Schneider A, Witt C, Hoffmann B.	2019	[Breathing: Ambient Air Pollution and Health - Part III]	n	n	n	n	n	n	n	y	n		10.1186/s12992-015-0104-1
schuurmans2020	Schuurmans AAT, Nijhof KS, Scholte R, Popma A, Otten R.	2020	A novel approach to improve stress regulation among traumatized youth in residential care: Feasibility study testing three game-based meditation interventions	n	n	n	n	n	n	n	y	n		10.17159/2411-9717/2017/v117n5a3
schwartz2014	Schwartz JI, Guwatudde D, Nugent R, Kiiza CM.	2014	Looking at non-communicable diseases in Uganda through a local lens: an analysis using locally derived data	n	n	n	n	n	n	n	y	n		10.1016/j.pneurobio.2012.06.004
schwartz2017	Schwartz RM, Gillezeau CN, Liu B, Lieberman-Cribbin W, Taioli E.	2017	Longitudinal Impact of Hurricane Sandy Exposure on Mental Health Symptoms	n	n	n	n	n	n	n	y	n		10.1016/j.socscimed.2020.113007
schwartz2019	Schwartz RM, Rasul R, Gargano LM, Lieberman-Cribbin W, Brackbill RM, Taioli E.	2019	Examining Associations Between Hurricane Sandy Exposure and Posttraumatic Stress Disorder by Community of Residence	n	n	n	n	n	n	n	y	n		10.1016/j.ijlp.2019.101532
schweitzer2014	Schweitzer, Robert D.; Vromans, Lyn; Ranke, Grace; Griffin, Jane	2014	Narratives of healing: A case study of a young Liberian refugee settled in Australia	n	n	n	n	n	n	n	y	n		10.1016/j.clinph.2016.02.017
schwenk2019	Schwenk, Heidi	2019	Outdoor Therapy: An Interpretative Phenomenological Analysis Examining the Lived-Experience, Embodied, and Therapeutic Process through Interpersonal Process Recall	n	n	n	n	n	n	n	y	n		10.3389/fpsyt.2020.00360
scott2010a	Scott, David A.; Duerson, Lauren M.	2010	Continuing the Discussion: A Commentary on "Wilderness Therapy: Ethical Considerations for Mental Health Professionals"	n	n	n	n	n	n	n	y	n		10.1016/j.healthplace.2018.07.006
sea2018	Sea J, Beauregard E.	2018	Body Disposal: Spatial and Temporal Characteristics in Korean Homicide	n	n	n	n	n	n	n	y	n		10.1016/j.envint.2018.11.046
seabrook2020	Seabrook E, Kelly R, Foley F, Theiler S, Thomas N, Wadley G, Nedeljkovic M.	2020	Understanding How Virtual Reality Can Support Mindfulness Practice: Mixed Methods Study	n	n	n	n	n	n	n	y	n		x
seaton2020	Seaton A, Tran L, Chen R, Maynard RL, Whalley LJ.	2020	Pollution, Particles, and Dementia: A Hypothetical Causative Pathway	n	n	n	n	n	n	n	y	n		10.1016/S2542-5196(17)30063-3
sebastian2012	Sebastian, Catherine	2012	Don't leave me out!	n	n	n	n	n	n	n	y	n		http://journal.hep.com.cn/laf/EN/Y2015/V3/I1/8
sebayang2019	Sebayang, Susy K.; Astutik, Erni; Dewi, Desak M. S. K.; Puspikawati, Septa I.	2019	Body Mass Index Is Associated with Mental Health Problems in Coastal Communities of Banyuwangi, Indonesia	n	n	n	n	n	n	n	y	n		10.1016/j.healthplace.2018.08.015
seidel2014	Seidel BM, Bell E.	2014	Health adaptation policy for climate vulnerable groups: a 'critical computational linguistics' analysis	n	n	n	n	n	n	n	y	n		10.1186/1471-2458-12-337
seritan2020	Seritan AL, Seritan I.	2020	The Time Is Now: Climate Change and Mental Health	n	n	n	n	n	n	n	y	n		10.1080/21606544.2015.1058195
settineri2016	Settineri, Salvatore; Mucciardi, Massimo; Leonardi, Valentina; Schlesinger, Stefan; Gioffre Florio, Mara; Fama, Fausto; Anna Muscatello, Maria R.; Mento, Carmela	2016	Metereological conditions and Psychiatric Emergency Visits in Messina, Italy	n	n	n	n	n	n	n	y	n		10.1016/j.envint.2011.07.004
seyedin2017	Seyedin, Hesam; HabibiSaravi, Reza; Sayfouri, Nasrin; Djenab, Vahid Hoseini; Hamedani, Fariba Ghasemi	2017	Psychological sequels of flood on residents of southeast Caspian region	n	n	n	n	n	n	n	y	n		10.1073/pnas.1503402112
shagdarsuren2017	Shagdarsuren T, Nakamura K, McCay L.	2017	Association between perceived neighborhood environment and health of middle-aged women living in rapidly changing urban Mongolia	n	n	n	n	n	n	n	y	n		10.1016/j.envint.2016.02.029
shalev2013	Shalev I, Entringer S, Wadhwa PD, Wolkowitz OM, Puterman E, Lin J, Epel ES.	2013	Stress and telomere biology: a lifespan perspective	n	n	n	n	n	n	n	y	n		10.1016/j.healthplace.2020.102344
shapiro2014	Shapiro, Yakov	2014	Psychodynamic Formulation in the Age of Neuroscience: A Dynamical Systems Model	n	n	n	n	n	n	n	y	n		10.1016/j.ecolecon.2018.02.014
shapiro2015	Shapiro, Yakov	2015	Dynamical Systems Therapy (DST): Theory and Practical Applications	n	n	n	n	n	n	n	y	n		10.1016/j.envint.2020.105982
sharma2016	Sharma, Sagar	2016	Impact of Globalisation on Mental Health in Low- and Middle-income Countries	n	n	n	n	n	n	n	y	n		10.1007/s10615-013-0442-5
sharma2017	Sharma, Malvika; Banerjee, Bratati; Garg, Suneela	2017	Assessment of Mental Health Literacy in School-going Adolescents	n	n	n	n	n	n	n	y	n		10.1007/s11205-015-1166-4
sharma2020	Sharma R, Hossain M, Pawar P, Sharma S.	2020	Air pollution and geriatric mental health: perspectives on the COVID-19 pandemic	n	n	n	n	n	n	n	y	y		10.2196/12556
shea2017	Shea SE, Goldman R.	2017	Ending Disparities and Achieving Justice for Individuals with Mental Disabilities	n	n	n	n	n	n	n	y	n		10.1080/09540261.2020.1766867
sheehan2016	Sheehan A, Miller SM.	2016	Nursing's Critical Role in the Shifting Landscape of Mental Health	n	n	n	n	n	n	n	y	n		10.4088/JCP.13055br2
sheffield2018	Sheffield, Perry E.; Speranza, Rosa; Chiu, Yueh-Hsiu Mathilda; Hsu, Hsiao-Hsien Leon; Curtin, Paul C.; Renzetti, Stefano; Pajak, Ashley; Coull, Brent; Schwartz, Joel; Kloog, Itai; Wright, Rosalind J.	2018	Association between particulate air pollution exposure during pregnancy and postpartum maternal psychological functioning	n	n	n	n	n	n	n	y	n		10.1371/journal.pone.0057111
shehab2019	Shehab MA, Pope FD.	2019	Effects of short-term exposure to particulate matter air pollution on cognitive performance	n	n	n	n	n	n	n	y	n		10.1016/j.mayocp.2013.08.016
shenesey2015	Shenesey JW, Langhinrichsen-Rohling J.	2015	Perceived resilience: Examining impacts of the deepwater horizon oil spill one-year post-spill	n	n	n	n	n	n	n	y	n		10.1111/nmo.12822
sheng2010	Sheng, Liu; Ding, Xinxin; Ferguson, Marcus; McCallister, Monique; Rhoades, Raina; Maguire, Mark; Ramesh, Aramandla; Aschner, Michael; Campbell, Daniel; Levitt, Pat; Hood, Darryl B.	2010	Prenatal Polycyclic Aromatic Hydrocarbon Exposure Leads to Behavioral Deficits and Downregulation of Receptor Tyrosine Kinase, MET	n	n	n	n	n	n	n	y	n		10.15698/mic2019.10.693
shi2020	Shi, Daqian; Yu, Hongwei	2020	Reevaluating the subjective welfare loss of air pollution	n	n	n	n	n	n	n	y	n		10.22365/jpsych.2019.303.189
shih2020	Shih HI, Chao TY, Huang YT, Tu YF, Wang JD, Chang CM.	2020	Increased incidence of stress-associated illnesses among elderly after Typhoon Morakot	n	n	n	n	n	n	n	y	n		10.1016/j.ifset.2013.10.016
shin2018	Shin J, Park JY, Choi J.	2018	Long-term exposure to ambient air pollutants and mental health status: A nationwide population-based cross-sectional study	n	n	n	n	n	n	n	y	n		10.1159/000504495
shioda2020	Shioda A, Yamauchi K.	2020	Community integration and related factors among people with mental illness in Japan: Multiple regression analysis stratified by social isolation level	n	n	n	n	n	n	n	y	n		10.1007/s10545-010-9240-1
shiue2015	Shiue I.	2015	Neighborhood epidemiological monitoring and adult mental health: European Quality of Life Survey, 2007-2012	n	n	n	n	n	n	n	y	n		10.1016/j.jeem.2017.04.001
shiue2016	Shiue I.	2016	People with dyslexia and?ßheart, chest, skin, digestive, musculoskeletal, vision, learning, speech and mental disorders were more dissatisfied with neighbourhoods: Scottish Household Survey, 2007-2008	n	n	n	n	n	n	n	y	n		10.1016/j.gloenvcha.2013.03.010
shojaie2018	Shojaie, Farzaneh Sadat; Amarmohamadi, Somayeh	2018	Structural explanation and investigation of residential complexes using the sustainable development approach	n	n	n	n	n	n	n	y	n		10.3389/fpsyt.2019.00256
shore2014	Shore MF.	2014	Marking time in the land of plenty: reflections on mental health in the United States	n	n	n	n	n	n	n	y	n		10.1007/s10567-019-00301-4
shorthouse2018	Shorthouse, Molly; Stone, Louise	2018	Inequity amplified: climate change, the Australian farmer, and mental health	n	n	n	n	n	n	n	y	n		10.1007/s11356-017-0860-y
shrestha2018	Shrestha A, Bergquist S, Montz E, Rose S.	2018	Mental Health Risk Adjustment with Clinical Categories and Machine Learning	n	n	n	n	n	n	n	y	n		10.1016/j.scitotenv.2016.10.231
shrestha2019	Shrestha, Rashesh	2019	Early Life Exposure to Air Pollution, Cognitive Development, and Labor Market Outcome	n	n	n	n	n	n	n	y	n		10.1111/ijd.14331
shukor2018	Shukor AR, Edelman S, Brown D, Rivard C.	2018	Developing Community-Based Primary Health Care for Complex and Vulnerable Populations in the Vancouver Coastal Health Region: HealthConnection Clinic	n	n	n	n	n	n	n	y	n		10.1016/j.ufug.2019.01.017
shultz2013	Shultz JM, McLean A, Herberman Mash HB, Rosen A, Kelly F, Solo-Gabriele HM, Youngs GA Jr, Jensen J, Bernal O, Neria Y.	2013	Mitigating flood exposure: Reducing disaster risk and trauma signature	n	n	n	n	n	n	n	y	n		10.1080/15401383.2018.1447415
shultz2015	Shultz JM, Walsh L, Garfin DR, Wilson FE, Neria Y.	2015	The 2010 Deepwater Horizon oil spill: the trauma signature of an ecological disaster	n	n	n	n	n	n	n	y	n		10.1186/1471-2458-14-1235
shultz2019	Shultz JM, Rechkemmer A, Rai A, McManus KT.	2019	Public Health and Mental Health Implications of Environmentally Induced Forced Migration	n	n	n	n	n	n	n	y	n		10.1111/j.1467-7717.2010.01182.x
sidandi2011	Sidandi P, Opondo P, Tidimane S.	2011	Mental health in Botswana	n	n	n	n	n	n	n	y	n		10.2196/mental.7603
sidenius2017	Sidenius U, Stigsdotter UK, Varning Poulsen D, Bondas T.	2017	"I look at my own forest and fields in a different way": the lived experience of nature-based therapy in a therapy garden when suffering from stress-related illness	n	n	n	n	n	n	n	y	n		10.3390/ijerph16030386
signoretta2019	Signoretta PE, Buffel V, Bracke P.	2019	Mental wellbeing, air pollution and the ecological state	n	n	n	n	n	n	n	y	n		x
silk2011	Silk JS, Forbes EE, Whalen DJ, Jakubcak JL, Thompson WK, Ryan ND, Axelson DA, Birmaher B, Dahl RE.	2011	Daily emotional dynamics in depressed youth: a cell phone ecological momentary assessment study	n	n	n	n	n	n	n	y	n		10.3390/ijerph14010071
silva2017	Silva AJ.	2017	Memory's Intricate Web	n	n	n	n	n	n	n	y	n		x
silveira2019	Silveira ML, Green VR, Iannaccone R, Kimmel HL, Conway KP.	2019	Patterns and correlates of polysubstance use among US youth aged 15-17?ßyears: wave 1 of the Population Assessment of Tobacco and Health (PATH) Study	n	n	n	n	n	n	n	y	n		10.1007/s11414-014-9404-0
silveirinha2013	Silveirinha de Oliveira E, Aspinall P, Briggs A, Cummins S, Leyland AH, Mitchell R, Roe J, Ward Thompson C.	2013	How effective is the Forestry Commission Scotland's woodland improvement programme--'Woods In and Around Towns' (WIAT)--at improving psychological well-being in deprived urban communities? A quasi-experimental study	n	n	n	n	n	n	n	y	n		10.1007/s00038-012-0422-5
simcock2019	Simcock G, Cobham VE, Laplante DP, Elgbeili G, Gruber R, Kildea S, King S.	2019	A cross-lagged panel analysis of children's sleep, attention, and mood in a prenatally stressed cohort: The QF2011 Queensland flood study	n	n	n	n	n	n	n	y	n		x
simkin2020	Simkin, Jenni; Ojala, Ann; Tyrvainen, Liisa	2020	Restorative effects of mature and young commercial forests, pristine old-growth forest and urban recreation forest - A field experiment	n	n	n	n	n	n	n	y	n		10.3390/ijerph15030430
sinha2018	Sinha Deb K, Tuli A, Sood M, Chadda R, Verma R, Kumar S, Ganesh R, Singh P.	2018	Is India ready for mental health apps (MHApps)? A quantitative-qualitative exploration of caregivers' perspective on smartphone-based solutions for managing severe mental illnesses in low resource settings	n	n	n	n	n	n	n	y	n		x
sinyor2017	Sinyor M, Tse R, Pirkis J.	2017	Global trends in suicide epidemiology	n	n	n	n	n	n	n	y	n		10.1371/currents.dis.7a2cee9e980f91ad7697b570bcc4b004
sipon2015	Sipon, Sapora; Sakdan, Mohd Fo'ad; Mustaffa, Che Su; Marzuki, Najib Ahmad; Khalid, Mohamad Sukeri; Ariffin, Mohd Taib; Nazli, Nik Nadian Nisa Nik; Abdullah, Salhah	2015	Spirituality among Flood Victims: A Comparison between Two States	n	n	n	n	n	n	n	y	n		10.1080/07011784.2015.1128854
sitwat2015	Sitwat A, Asad S, Yousaf A.	2015	Psychopathology, Psychiatric Symptoms and their Demographic Correlates in Female Adolescents Flood Victims	n	n	n	n	n	n	n	y	n		10.1007/s40572-015-0044-1
sivarajah2018	Sivarajah S, Smith SM, Thomas SC.	2018	Tree cover and species composition effects on academic performance of primary school students	n	n	n	n	n	n	n	y	n		10.1016/j.envres.2018.11.032
skale2020	Skale G, Perez H, Williams ME.	2020	Factors Influencing Implementation of Evidence-Based Mental Health Interventions for Infants and Young Children	n	n	n	n	n	n	n	y	n		10.1016/S2542-5196(20)30058-9
skovdal2012	Skovdal M.	2012	Pathologising healthy children? A review of the literature exploring the mental health of HIV-affected children in sub-Saharan Africa	n	n	n	n	n	n	n	y	n		10.1093/bmb/ldz011
slekiene2018	Slekiene J, Mosler HJ.	2018	Characterizing the Last Latrine Nonowners in Rural Malawi	n	n	n	n	n	n	n	y	n		10.3310/phr07020
smallman2010	Smallman, Shawn	2010	Spirit Beings, Mental Illness, and Murder: Fur Traders and the Windigo in Canada's Boreal Forest, 1774 to 1935	n	n	n	n	n	n	n	y	n	historic	10.1080/23761407.2018.1502115
snodgrass2017	Snodgrass, Jeffrey G.; Most, David E.; Upadhyay, Chakrapani	2017	Religious Ritual Is Good Medicine for Indigenous Indian Conservation Refugees Implications for Global Mental Health	n	n	n	n	n	n	n	y	n		10.1017/s1049023x00008141
soares2020	Soares Santos A, de Souza Noronha KVM, Viegas Andrade M, Mariano Ruas C.	2020	PERSPECTIVES: Insurance markets, labor markets, and the mental health services delivery system	n	n	n	n	n	n	n	y	n		10.1007/s40471-014-0009-1
soga2017	Soga M, Cox DT, Yamaura Y, Gaston KJ, Kurisu K, Hanaki K.	2017	Health Benefits of Urban Allotment Gardening: Improved Physical and Psychological Well-Being and Social Integration	n	n	n	n	n	n	n	y	n		10.3402/gha.v9.30723
soleimani2020	Soleimani, Zahra; Teymouri, Pari; Boloorani, Ali Darvishi; Mesdaghinia, Alireza; Middleton, Nick; Griffin, Dale W.	2020	An overview of bioaerosol load and health impacts associated with dust storms: A focus on the Middle East	n	n	n	n	n	n	n	y	n		10.1186/s13012-016-0495-2
song2014	Song C, Ikei H, Igarashi M, Miwa M, Takagaki M, Miyazaki Y.	2014	Physiological and psychological responses of young males during spring-time walks in urban parks	n	n	n	n	n	n	n	y	n		10.1109/SCC.2015.47
song2015	Song C, Ikei H, Miyazaki Y.	2015	Elucidation of a physiological adjustment effect in a forest environment: a pilot study	n	n	n	n	n	n	n	y	n		10.1080/00918369.2018.1490573
song2019	Song, Yan; Zhou, Aina; Zhang, Ming; Wang, Hui	2019	Assessing the effects of haze pollution on subjective well-being based on Chinese General Social Survey	n	n	n	n	n	n	n	y	n		10.1016/j.emc.2015.07.013
song2019a	Song H, Lane KJ, Kim H, Kim H, Byun G, Le M, Choi Y, Park CR, Lee JT.	2019	Association between Urban Greenness and Depressive Symptoms: Evaluation of Greenness Using Various Indicators	n	n	n	n	n	n	n	y	n		10.3389/fgene.2018.00173
song2020	Song MK, Bang KS, Kim S, Lee G, Jeong Y.	2020	Effects of an Urban Forest-Based Health Promotion Program on Children Living in Group Homes	n	n	n	n	n	n	n	y	n		10.2147/PRBM.S12996
sonntag2015	Sonntag-Ostrom, Elisabet; Nordin, Maria; Dolling, Ann; Lundell, Ylva; Nilsson, Leif; Jarvholm, Lisbeth Slunga	2015	Can rehabilitation in boreal forests help recovery from exhaustion disorder? The randomised clinical trial ForRest	n	n	n	n	n	n	n	y	n		10.1007/s11356-018-1534-0
sood2016	Sood A.	2016	The Global Mental Health movement and its impact on traditional healing in India: A case study of the Balaji temple in Rajasthan	n	n	n	n	n	n	n	y	n		10.1145/2858036.2858128
south2018	South EC, Hohl BC, Kondo MC, MacDonald JM, Branas CC.	2018	Effect of Greening Vacant Land on Mental Health of Community-Dwelling Adults: A Cluster Randomized Trial	n	n	n	n	n	n	n	y	n		10.1016/j.childyouth.2017.12.020
sperry2018	Sperry SH, Kwapil TR, Eddington KM, Silvia PJ.	2018	Psychopathology, everyday behaviors, and autonomic activity in daily life: An ambulatory impedance cardiography study of depression, anxiety, and hypomanic traits	n	n	n	n	n	n	n	y	n		10.1007/s10389-016-0759-y
sprague2015	Sprague, Caryll M.; Kia-Keating, Maryam; Felix, Erika; Afifi, Tamara; Reyes, Gilbert; Afifi, Walid	2015	Youth Psychosocial Adjustment Following Wildfire: The Role of Family Resilience, Emotional Support, and Concrete Support	n	n	n	n	n	n	n	y	n		10.1186/s12913-019-4005-5
sprah2014	Sprah, Lilijana; Novak, Tatjana; Fridl, Jerneja	2014	The wellbeing of Slovenia's population by region: comparison of indicators with an emphasis on health	n	n	n	n	n	n	n	y	n		10.3390/ijerph14070703
sram2017	Sram RJ, Veleminsky M Jr, Veleminsky M Sr, Stejskalov?Ý J.	2017	The impact of air pollution to central nervous system in children and adults	n	n	n	n	n	n	n	y	n		x
stanke2012	Stanke C, Murray V, Aml??t R, Nurse J, Williams R.	2012	The effects of flooding on mental health: Outcomes and recommendations from a review of the literature	n	n	y	n	n	n	n	y	n		10.1016/j.scitotenv.2011.11.038
stanley2015	Stanley F, Farrant B.	2015	Climate Change and Children's Health: A Commentary	n	n	n	n	n	n	n	y	n		10.1136/bmjopen-2012-001396
stanley2018	Stanley IH, Hom MA, Gai AR, Joiner TE.	2018	Wildland firefighters and suicide risk: Examining the role of social disconnectedness	n	n	n	n	n	n	n	y	n		10.1111/j.1365-2648.2010.05551.x
stansfeld2015	Stansfeld S, Clark C.	2015	Health Effects of Noise Exposure in Children	n	n	n	n	n	n	n	y	n		x
stansfeld2015a	Stansfeld SA, Shipley M.	2015	Noise sensitivity and future risk of illness and mortality	n	n	n	n	n	n	n	y	n		10.1002/ajpa.23833
staudt2016	Staudt, Kathleen; Dane'el, Mosi; Marquez-Velarde, Guadalupe	2016	In the shadow of a steel recycling plant in these neoliberal times: health disparities among Hispanics in a border colonia	n	n	n	n	n	n	n	y	n		10.1016/j.neurobiolaging.2018.01.009
stawarz2019	Stawarz K, Preist C, Coyle D.	2019	Use of Smartphone Apps, Social Media, and Web-Based Resources to Support Mental Health and Well-Being: Online Survey	n	n	n	n	n	n	n	y	n		10.1017/gmh.2018.34
stepleman2019	Stepleman LM, Yohannan J, Scott SM, Titus LL, Walker J, Lopez EJ, Wooten Smith L, Rossi AL, Toomey TM, Eldridge ED.	2019	Health Needs and Experiences of a LGBT Population in Georgia and South Carolina	n	n	n	n	n	n	n	y	n		10.1016/j.jad.2013.05.085
stevens2018	Stevens, Julie L.; Toews, Barb; Wagenfeld, Amy	2018	Designing the Correctional Landscape: An Invitation to Landscape Architecture Professionals	n	n	n	n	n	n	n	y	n		10.1111/j.1399-5618.2009.00770.x
stewart2017	Stewart, Ronald E.; Betancourt, Daniel; Davies, James B.; Harford, Deborah; Klein, Yaheli; Lannigan, Robert; Mortsch, Linda; O'Connell, Erin; Tang, Kathy; Whitfield, Paul H.	2017	A multi-perspective examination of heat waves affecting Metro Vancouver: now into the future	n	n	n	n	n	n	n	y	n		10.1007/s40519-019-00832-3
stickley2017	Stickley A, Sheng Ng CF, Konishi S, Koyanagi A, Watanabe C.	2017	Airborne pollen and suicide mortality in Tokyo, 2001-2011	n	n	n	n	n	n	n	y	n		10.1016/j.psym.2019.05.002
stoor2019	Stoor JPA, Berntsen G, Hjelmeland H, Silviken A.	2019	"If you do not birget [manage] then you don't belong here": a qualitative focus group study on the cultural meanings of suicide among Indigenous S?Ými in arctic Norway	n	n	n	n	n	n	n	y	n		10.1037/a0021971
stough2018	Stough LM, North CS.	2018	The association of adverse mental health effects with repeated exposure to disasters	n	n	n	n	n	n	n	y	n		10.1002/hipo.22717
stubbings2019	Stubbings, Philip; Peskett, Joe; Rowe, Francisco; Arribas-Bel, Dani	2019	A Hierarchical Urban Forest Index Using Street-Level Imagery and Deep Learning	n	n	n	n	n	n	n	y	n		10.1007/s10903-012-9626-2
stylianidis2019	Stylianidis S, Souliotis K.	2019	The impact of the long-lasting socioeconomic crisis in Greece	n	n	n	n	n	n	n	y	n		10.1016/bs.pbr.2014.11.017
su2014	Su, Yun; Hu, Bin; Xu, Lixin; Cai, Hanshu; Moore, Philip; Zhang, Xiaowei; Chen, Jing	2014	EmotionO plus : Physiological Signals Knowledge Representation and Emotion Reasoning Model for Mental Health Monitoring	n	n	n	n	n	n	n	y	n		10.1108/JPMH-11-2015-0047
sui2018	Sui G, Liu G, Jia L, Wang L, Yang G.	2018	The association between ambient air pollution exposure and mental health status in Chinese female college students: a cross-sectional study	n	n	n	n	n	n	n	y	n		10.1097/01.NMC.0000437535.99514.95
summers2018	Summers JK, Vivian DN.	2018	Ecotherapy - A Forgotten Ecosystem Service: A Review	n	n	n	n	n	n	n	y	n		10.1007/s12024-014-9554-7
sun2011	Sun, Fuhua; Shen, Juqin; Ji, Jian; Qin, Qi; Wu, Jun	2011	Scope definition of social impact of the Blue-green algae event in Taihu Lake and necessity and feasibility of research	n	n	n	n	n	n	n	y	n		10.1080/14659891.2016.1177612
sun2018	Sun X, Yang W, Sun T, Wang Y.	2018	Negative Emotion under Haze: An Investigation Based on the Microblog and Weather Records of Tianjin, China	n	n	n	n	n	n	n	y	n		x
sunyer2015	Sunyer J, Esnaola M, Alvarez-Pedrerol M, Forns J, Rivas I, L??pez-Vicente M, Suades-Gonz?Ýlez E, Foraster M, Garcia-Esteban R, Basaga??a X, Viana M, Cirach M, Moreno T, Alastuey A, Sebastian-Galles N, Nieuwenhuijsen M, Querol X.	2015	Association between traffic-related air pollution in schools and cognitive development in primary school children: a prospective cohort study	n	n	n	n	n	n	n	y	n		10.1108/IJCCSM-03-2018-0026
syed2011	Syed Sheriff RJ, Reggi M, Mohamed A, Haibe F, Whitwell S, Jenkins R.	2011	Mental health in Somalia	n	n	n	n	n	n	n	y	n		10.1016/j.cppeds.2013.06.001
sygna2014	Sygna K, Aasvang GM, Aamodt G, Oftedal B, Krog NH.	2014	Road traffic noise, sleep and mental health	n	n	n	n	n	n	n	y	n		x
szyszkowicz2018	Szyszkowicz M, Thomson EM, Colman I, Rowe BH.	2018	Ambient air pollution exposure and emergency department visits for substance abuse	n	n	n	n	n	n	n	y	n		10.1002/14651858.CD008657.pub2
szyszkowicz2020	Szyszkowicz M, Zemek R, Colman I, Gardner W, Kousha T, Smith-Doiron M.	2020	Air Pollution and Emergency Department Visits for Mental Disorders among Youth	n	n	n	n	n	n	n	y	n		10.1371/journal.pone.0020101
tacker2019	Tacker, Katherine; Choi, Octavio	2019	Belonging, Therapeutic Landscapes, and Networks: Implications for Mental Health Practice	n	n	n	n	n	n	n	y	n		10.3402/ijch.v74.28704
tallman2019	Tallman, Paula Skye	2019	Water insecurity and mental health in the Amazon: Economic and ecological drivers of distress	n	n	n	n	n	n	n	y	n		10.1093/envhis/emx126
tallon2017	Tallon LA, Manjourides J, Pun VC, Salhi C, Suh H.	2017	Cognitive impacts of ambient air pollution in the National Social Health and Aging Project (NSHAP) cohort	n	n	n	n	n	n	n	y	n		10.4103/psychiatry.IndianJPsychiatry_16_17
tally2013	Tally S, Levack A, Sarkin AJ, Gilmer T, Groessl EJ.	2013	The impact of the San Diego wildfires on a general mental health population residing in evacuation areas	n	n	n	n	n	n	n	y	n		10.1159/000500699
tamasese2020	Tamasese TK, Bush A, Parsons TL, Sawrey R, Waldegrave C.	2020	Asiasiga i A'oga ma Nu'u: a child and adolescent post-tsunami intervention based on Indigenous Samoan values	n	n	n	n	n	n	n	y	n		10.1136/bmjopen-2013-003648
tana2018	Tana JC, Kettunen J, Eirola E, Paakkonen H.	2018	Diurnal Variations of Depression-Related Health Information Seeking: Case Study in Finland Using Google Trends Data	n	n	n	n	n	n	n	y	n		10.1177/2329496519870216
tanaka2014	Tanaka S.	2014	[Persistent depression with minute schizophrenia-like symptoms--from the viewpoint of "pluridimensional psychiatry"]	n	n	n	n	n	n	n	y	n		10.3390/ijerph15071367
tanielian2016	Tanielian T, Hansen ML, Martin LT, Grimm G, Ogletree C.	2016	Supporting the Mental Health Needs of Veterans in the Metro Detroit Area	n	n	n	n	n	n	n	y	n		10.1556/2006.2020.00031
tapak2018	Tapak L, Maryanaji Z, Hamidi O, Abbasi H, Najafi-Vosough R.	2018	Investigating the effect of climatic parameters on mental disorder admissions	n	n	n	n	n	n	n	y	n		10.3389/fpg.2015.01093
tarsitano2020	Tarsitano, Elvira; Posca, Cecilia; Giannoccaro Rosa, Alba; Borghi, Carolina; Trentadue, Consiglia; Romanazzi, Giovanna; Colao, Marcello	2020	A "Park to Live" between environmental education and social inclusion through a landsense ecology approach	n	n	n	n	n	n	n	y	n		10.1016/j.ijlp.2019.04.002
tasdik2020	Tasdik Hasan M, Adhikary G, Mahmood S, Papri N, Shihab HM, Kasujja R, Ahmed HU, Azad AK, Nasreen M.	2020	Exploring mental health needs and services among affected population in a cyclone affected area in costal Bangladesh: a qualitative case study	n	n	n	n	n	n	n	y	n		10.1007/s00520-015-3011-3
tate2020	Tate AE, McCabe RC, Larsson H, Lundstr?┬m S, Lichtenstein P, Kuja-Halkola R.	2020	Predicting mental health problems in adolescence using machine learning techniques	n	n	n	n	n	n	n	y	n		10.1136/ebmental-2019-300117
taverna2020	Taverna, Andrea S.; Medin, Douglas L.; Waxman, Sandra R.	2020	Tracing culture in children's thinking: a socioecological framework in understanding nature (Rastreando la cultura en el pensamiento infantil: una socioecologia para comprender la naturaleza)	n	n	n	n	n	n	n	y	n		10.1002/wps.20150
tawatsupa2010	Tawatsupa B, Lim LL, Kjellstrom T, Seubsman SA, Sleigh A, The Thai Cohort Study Team.	2010	The association between overall health, psychological distress, and occupational heat stress among a large national cohort of 40,913 Thai workers	n	n	n	n	n	n	n	y	n		10.1016/j.jth.2019.100587
tawatsupa2012	Tawatsupa B, Yiengprugsawan V, Kjellstrom T, Seubsman SA, Sleigh A; Thai Cohort Study Team.	2012	Heat stress, health and well-being: findings from a large national cohort of Thai adults	n	n	n	n	n	n	n	y	n		10.1016/j.jveb.2012.08.001
taylor2016	Taylor, Lauren A.	2016	RECONSIDERING SAMUEL a mental health caretaker at a Ghanaian prayer camp	n	n	n	n	n	n	n	y	n		10.1186/s13024-020-00388-2
taylor2019a	Taylor-Brown, Emilie; Dickson, Melissa; Shuttleworth, Sally	2019	Structures of Confinement: Power and Problems of Male Identity	n	n	n	n	n	n	n	y	n		10.2196/13809
tehrani2019	Tehrani SO, Wu SJ, Roberts JD.	2019	The Color of Health: Residential Segregation, Light Rail Transit Developments, and Gentrification in the United States	n	n	n	n	n	n	n	y	n		10.1016/j.psychres.2020.112803
tempest2017	Tempest EL; English National Study on Flooding and Health Study Group, Carter B, Beck CR, Rubin GJ.	2017	Secondary stressors are associated with probable psychological morbidity after flooding: a cross-sectional analysis	n	n	n	n	n	n	n	y	n		10.1186/s12888-020-02803-w
temple2011	Temple JR, van den Berg P, Thomas JF, Northcutt J, Thomas C, Freeman DH Jr.	2011	Teen dating violence and substance use following a natural disaster: does evacuation status matter?	n	n	n	n	n	n	n	y	n		x
temte2019	Temte JL, Holzhauer JR, Kushner KP.	2019	Correlation Between Climate Change and Dysphoria in Primary Care	n	n	n	n	n	n	n	y	n		10.1109/EMBC.2016.7591078
tesfaye2020	Tesfaye E, Krahl W, Alemayehu S.	2020	Khat induced psychotic disorder: case report	n	n	n	n	n	n	n	y	n		10.1145/3284869.3284894
thake2017	Thake CL, Bambling M, Edirippulige S, Marx E.	2017	A Psychoevolutionary Approach to Identifying Preferred Nature Scenes With Potential to Provide Restoration From Stress	n	n	n	n	n	n	n	y	n		10.1111/j.1468-2435.2011.00722.x
thieken2016	Thieken, Annegret H.; Bessel, Tina; Kienzler, Sarah; Kreibich, Heidi; Mueller, Meike; Pisi, Sebastian; Schroeter, Kai	2016	The flood of June 2013 in Germany: how much do we know about its impacts?	n	n	n	n	n	n	n	y	n		10.1093/ibd/izaa032
thielecke2020	Thielecke J, Buntrock C, Titzler I, Braun L, Freund J, Berking M, Baumeister H, Ebert DD.	2020	Clinical and Cost-Effectiveness of Personalized Tele-Based Coaching for Farmers, Foresters and Gardeners to Prevent Depression: Study Protocol of an 18-Month Follow-Up Pragmatic Randomized Controlled Trial (TEC-A)	n	n	n	n	n	n	n	y	n		10.1136/bmjopen-2019-030530
thielke2011	Thielke S, Thompson A, Stuart R.	2011	Health psychology in primary care: recent research and future directions	n	n	n	n	n	n	n	y	n		10.1136/amiajnl-2013-001933
thilakaratne2020	Thilakaratne RA, Malig BJ, Basu R.	2020	Examining the relationship between ambient carbon monoxide, nitrogen dioxide, and mental health-related emergency department visits in California, USA	n	n	n	n	n	n	n	y	n		10.1016/j.schres.2019.04.028
thomas2015	Thomas, Felicity	2015	The role of natural environments within women's everyday health and wellbeing in Copenhagen, Denmark	n	n	n	n	n	n	n	y	n		10.1080/00438243.2018.1487332
thompson2016	Thompson, Catherine V.; Bennett, Jessie L.; Sable, Janet R.; Gravink, Jill	2016	Northeast Passage PATH (TM) Program A Strengths-Based and Recovery-Oriented Approach for Veterans Who Experience Mental Health Disorders	n	n	n	n	n	n	n	y	n		10.1176/appi.ps.201300199
thompson2019a	Thompson CW, Elizalde A, Cummins S, Leyland AH, Botha W, Briggs A, Tilley S, de Oliveira ES, Roe J, Aspinall P, Mitchell R.	2019	Enhancing Health Through Access to Nature: How Effective are Interventions in Woodlands in Deprived Urban Communities? A Quasi-experimental Study in Scotland, UK	n	n	n	n	n	n	n	y	n		10.1111/j.1440-1584.2011.01223.x
thomson2013	Thomson H, Thomas S, Sellstrom E, Petticrew M.	2013	Housing improvements for health and associated socio-economic outcomes	n	n	n	n	n	n	n	y	n		10.1007/s12530-017-9205-9
tian2013	Tian, Peizhe; Chen, Fuxiang; Pi, Wei	2013	Fresh Air Exchange Method Research of Residential House Based on Natural Ventilation	n	n	n	n	n	n	n	y	n		10.1016/j.nicl.2020.102242
tian2015	Tian T, Chen Y, Zhu J, Liu P.	2015	Effect of Air Pollution and Rural-Urban Difference on Mental Health of the Elderly in China	n	n	n	n	n	n	n	y	n		10.1016/j.aip.2013.04.001
tillmann2018	Tillmann S, Clark AF, Gilliland JA.	2018	Children and Nature: Linking Accessibility of Natural Environments and Children's Health-Related Quality of Life	n	n	n	n	n	n	n	y	n		10.1186/s12888-018-1799-3
tischer2013	Tischer CG, Heinrich J.	2013	Exposure assessment of residential mould, fungi and microbial components in relation to children's health: achievements and challenges	n	n	n	n	n	n	n	y	n		10.13075/ijomeh.1896.01277
tiwari2013	Tiwari SC, Pandey NM.	2013	The Indian concepts of lifestyle and mental health in old age	n	n	n	n	n	n	n	y	n		10.11124/JBISRIR-D-19-00253
tobah2017	Tobah, Selma	2017	Constructing Mental Illness: Comparing Discourses on Mental Health, Illness, and Depression by Muslim Leaders with those found in Consumer Health Materials	n	n	n	n	n	n	n	y	n		10.1186/s13148-019-0641-1
tobin2011	Tobin, Graham A.; Whiteford, Linda M.; Jones, Eric C.; Murphy, Arthur D.; Garren, Sandra J.; Padros, Cecilia Vindrola	2011	The role of individual well-being in risk perception and evacuation for chronic vs. acute natural hazards in Mexico	n	n	n	n	n	n	n	y	n		10.3233/HAB-190364
todorow2018	Todorow C, Connell J, Turchi RM.	2018	The medical home for children with autism spectrum disorder: an essential element whose time has come	n	n	n	n	n	n	n	y	n		10.1016/S2352-3018(19)30190-0
tom2016	Tom?Ýs CC, Oliveira E, Sousa D, Uba-Chupel M, Furtado G, Rocha C, Teixeira A, Ferreira P, Alves C, Gisin S, Catarino E, Carvalho N, Coucelo T, Bonfim L, Silva C, Franco D, Gonz?Ýlez JA, Jardim HG, Silva R, Baixinho CL, Presado M?¼H, Marques M?¼F, Cardoso ME, Cunha M, Mendes J, Xavier A, Galhardo A, Couto M, Frade JG, Nunes C, Mesquita JR, Nascimento MS, Gon?║alves G, Castro C, M?Ýrtires A, Montei…	2016	Proceedings of the 3rd IPLeiria's International Health Congress : Leiria, Portugal. 6-7 May 2016	n	n	n	n	n	n	n	y	n		10.1016/j.envpol.2017.08.075
tomita2014	Tomita H.	2014	[Perspectives on researches in disaster psychiatry]	n	n	n	n	n	n	n	y	n		10.1007/s10826-013-9838-7
tomita2017	Tomita A, Vandormael AM, Cuadros D, Di Minin E, Heikinheimo V, Tanser F, Slotow R, Burns JK.	2017	Green environment and incident depression in South Africa: a geospatial analysis and mental health implications in a resource-limited setting	n	n	n	n	n	n	n	y	n		10.1053/j.semvascsurg.2015.12.001
tomlin2020	Tomlin J.	2020	The climate crisis and forensic mental healthcare: what are we doing?	n	n	n	n	n	n	n	y	n		10.1016/j.scitotenv.2019.06.458
tong2016	Tong S, Berry HL, Ebi K, Bambrick H, Hu W, Green D, Hanna E, Wang Z, Butler CD.	2016	Climate change, food, water and population health in China	n	n	n	n	n	n	n	y	n		10.3390/atmos11050493
tong2017	Tong S.	2017	Flooding-related displacement and mental health	n	n	n	n	n	n	n	y	n		x
tong2019	Tong G.	2019	World Mental Health Day 2018, but how aware are medical students?	n	n	n	n	n	n	n	y	n		10.1080/13803395.2015.1029440
torous2017	Torous J, Roberts LW.	2017	The Ethical Use of Mobile Health Technology in Clinical Psychiatry	n	n	n	n	n	n	n	y	n		10.1177/0971333616657176
torres2017	Torres JM, Casey JA.	2017	The centrality of social ties to climate migration and mental health	n	n	n	n	n	n	n	y	n		10.1016/j.psyneuen.2010.03.004
tosone2015	Tosone, Carol; McTighe, John P.; Bauwens, Jennifer	2015	Shared Traumatic Stress among Social Workers in the Aftermath of Hurricane Katrina	n	n	n	n	n	n	n	y	n		10.1289/EHP3909
tozzi2020	Tozzi L, Staveland B, Holt-Gosselin B, Chesnut M, Chang SE, Choi D, Shiner M, Wu H, Lerma-Usabiaga G, Sporns O, Barch DM, Gotlib IH, Hastie TJ, Kerr AB, Poldrack RA, Wandell BA, Wintermark M, Williams LM.	2020	The human connectome project for disordered emotional states: Protocol and rationale for a research domain criteria study of brain connectivity in young adult anxiety and depression	n	n	n	n	n	n	n	y	n		10.1093/geront/gnz018
tran2020	Tran TT, Rolle CE, Gazzaley A, Voytek B.	2020	Linked Sources of Neural Noise Contribute to Age-related Cognitive Decline	n	n	n	n	n	n	n	y	n		10.3390/ijerph17155560
tremain2017	Tremain AL.	2017	The PARENTED Outline for Observing Hospitalized Pediatric Patients and Their Families	n	n	n	n	n	n	n	y	n		10.1136/bmjopen-2019-031562
trombley2017	Trombley J, Chalupka S, Anderko L.	2017	Climate Change and Mental Health	n	n	n	n	n	n	n	y	n		10.1016/j.nlm.2018.03.017
trudel2016	Trudel-Fitzgerald C, Chen Y, Singh A, Okereke OI, Kubzansky LD.	2016	Psychiatric, Psychological, and Social Determinants of Health in the Nurses' Health Study Cohorts	n	n	n	n	n	n	n	y	n		10.1016/j.jeoa.2018.01.002
tsai2018	Tsai WL, McHale MR, Jennings V, Marquet O, Hipp JA, Leung YF, Floyd MF.	2018	Relationships between Characteristics of Urban Green Land Cover and Mental Health in U.S. Metropolitan Areas	n	n	n	n	n	n	n	y	n		10.3390/ijerph15091884
tsamakis2020	Tsamakis K, Triantafyllis AS, Tsiptsios D, Spartalis E, Mueller C, Tsamakis C, Chaidou S, Spandidos DA, Fotis L, Economou M, Rizos E.	2020	COVID-19 related stress exacerbates common physical and mental pathologies and affects treatment (Review)	n	n	n	n	n	n	n	y	y		10.3390/ijerph17020637
tseng2016	Tseng, Tzuhui Angie; Shen, Ching-Cheng	2016	The Health Benefits of Children by Different Natural Landscape Contacting Level	n	n	n	n	n	n	n	y	n		10.1353/foc.2016.0004
tsurumi2018	Tsurumi, Tetsuya; Imauji, Atsushi; Managi, Shunsuke	2018	Greenery and Subjective Well-being: Assessing the Monetary Value of Greenery by Type	n	n	n	n	n	n	n	y	n		x
tucker2015	Tucker, Anita R.; Bettmann, Joanna E.; Norton, Christine L.; Comart, Casey	2015	The Role of Transport Use in Adolescent Wilderness Treatment: Its Relationship to Readiness to Change and Outcomes	n	n	n	n	n	n	n	y	n		10.1176/appi.ps.201500084
tucker2016	Tucker, Anita; Norton, Christine Lynn; DeMille, Steven M.; Hobson, Jessalyn	2016	The Impact of Wilderness Therapy: Utilizing an Integrated Care Approach	n	n	n	n	n	n	n	y	n		10.5539/gjhs.v8n4p10
twomey2018	Twomey KE, Ma L, Westermann G.	2018	All the Right Noises: Background Variability Helps Early Word Learning	n	n	n	n	n	n	n	y	n		10.1192/s2056474000000246
tzivian2015	Tzivian L, Winkler A, Dlugaj M, Schikowski T, Vossoughi M, Fuks K, Weinmayr G, Hoffmann B.	2015	Effect of long-term outdoor air pollution and noise on cognitive and psychological functions in adults	n	n	n	n	n	n	n	y	n		10.1186/s12888-019-2157-9
uijtdewilligen2019	Uijtdewilligen, Leonie; Waters, Clarice Nhat-Hien; Aw, Su; Wong, Mee Lian; Sia, Angelia; Ramiah, Anbumalar; Wong, Michael; Mueller-Riemenschneider, Falk	2019	The Park Prescription Study: Development of a community-based physical activity intervention for a multi-ethnic Asian population	n	n	n	n	n	n	n	y	n		10.1093/geronb/gbv041
ungar2015	Ungar M.	2015	Practitioner Review: Diagnosing childhood resilience--a systemic approach to the diagnosis of adaptation in adverse social and physical ecologies	n	n	n	n	n	n	n	y	n		10.1001/jamaoto.2015.129
unnikrishnan2012	Unnikrishnan B, Jagannath V, Ramapuram JT, Achappa B, Madi D.	2012	Study of Depression and Its Associated Factors among Women Living with HIV/AIDS in Coastal South India	n	n	n	n	n	n	n	y	n		10.3389/fpsyg.2019.01787
usami2018	Usami M, Lomboy MFT, Satake N, Estrada CAM, Kodama M, Gregorio ER Jr, Suzuki Y, Uytico RB, Molon MP, Harada I, Yamamoto K, Inazaki K, Ushijima H, Leynes C, Kobayashi J, Quizon RR, Hayakawa T.	2018	Addressing challenges in children's mental health in disaster-affected areas in Japan and the Philippines - highlights of the training program by the National Center for Global Health and Medicine	n	n	n	n	n	n	n	y	n		10.3389/fpsyt.2014.00105
usher2019	Usher K, Durkin J, Bhullar N.	2019	Eco-anxiety: How thinking about climate change-related environmental decline is affecting our mental health	n	n	n	n	n	n	n	y	n
uttervall2014	Uttervall M, Hultman CM, Ekerwald H, Lindam A, Lundin T.	2014	After the flood: resilience among tsunami-afflicted adolescents	n	n	n	n	n	n	n	y	n		10.1186/2045-4015-2-22
vaidyam2020	Vaidyam A, Roux S, Torous J.	2020	Patient Innovation in Investigating the Effects of Environmental Pollution in Schizophrenia: Case Report of Digital Phenotyping Beyond Apps	n	n	n	n	n	n	n	y	n		10.2196/10133
valcour2011	Valcour, J.; Martin, D.; Bull, J.; Paul, M.; Graham, J.; Wall, D.	2011	A LOSS OF COLOUR: MENTAL HEALTH IN SOUTH LABRADOR COASTAL COMMUNITIES	n	n	n	n	n	n	n	y	n		10.1111/j.1440-1584.2011.01225.x
valenti2010	Valenti?þ D, Micovi?þ V, Kolari?þ B, Brnci?þ N, Ljubotina A.	2010	The role of air quality in perception of health of the local population	n	n	n	n	n	n	n	y	n		x
valois2016	Valois P, Blouin P, Ouellet C, Renaud JS, B?«langer D, Gosselin P.	2016	The Health Impacts of Climate Change: A Continuing Medical Education Needs Assessment Framework	n	n	n	n	n	n	n	y	n		10.1080/13561820.2019.1621276
valois2017	Valois P, Talbot D, Caron M, Carrier MP, Morin AJS, Renaud JS, Jacob J, Gosselin P.	2017	Development and Validation of a Behavioural Index for Adaptation to High Summer Temperatures among Urban Dwellers	n	n	n	n	n	n	n	y	n		x
valois2019	Valois P, Caron M, Gousse-Lessard AS, Talbot D, Renaud JS.	2019	Development and validation of five behavioral indices of flood adaptation	n	n	n	n	n	n	n	y	n		10.1037/gpr0000031
van2015b	van Kessel G, Gibbs L, MacDougall C.	2015	Strategies to enhance resilience post-natural disaster: a qualitative study of experiences with Australian floods and fires	n	n	n	n	n	n	n	y	n		10.1080/13549839.2015.1016902
van2015c	van den Bosch MA, ?¹stergren PO, Grahn P, Sk?±rb?±ck E, W?±hrborg P.	2015	Moving to Serene Nature May Prevent Poor Mental Health--Results from a Swedish Longitudinal Cohort Study	n	n	n	n	n	n	n	y	n		10.1111/j.1440-1584.2011.01224.x
van2017b	Van den Hazel, P.	2017	Perspective on Children's public mental health and climate change	n	n	n	n	n	n	n	y	n		10.1353/foc.2010.0006
van2018	Van Berkel DB, Tabrizian P, Dorning MA, Smart L, Newcomb D, Mehaffey M, Neale A, Meentemeyer RK.	2018	Quantifying the visual-sensory landscape qualities that contribute to cultural ecosystem services using social media and LiDAR	n	n	n	n	n	n	n	y	n		10.1016/j.envint.2020.106014
van2018a	van Oudenhoven, Alexander P. E.; Aukes, Ewert; Bontje, Lotte E.; Vikolainen, Vera; van Bodegom, Peter M.; Slinger, Jill H.	2018	'Mind the Gap' between ecosystem services classification and strategic decision making	n	n	n	n	n	n	n	y	n		10.15171/ijhpm.2017.55
van2019	van den Bosch M, Meyer-Lindenberg A.	2019	Environmental Exposures and Depression: Biological Mechanisms and Epidemiological Evidence	n	n	n	n	n	n	n	y	n		10.1007/s11252-019-00863-9
van2019a	van der Meulen H, McCashin D, O'Reilly G, Coyle D.	2019	Using Computer Games to Support Mental Health Interventions: Naturalistic Deployment Study	n	n	n	n	n	n	n	y	n		10.1017/S1049023X13008662
van2019c	Van den Hazel, Peter	2019	Prevention of mental health effects by climate change and environmental drivers	n	n	n	n	n	n	n	y	n		10.1016/j.jfma.2020.05.016
van2020b	van Hoffen MFA, Norder G, Twisk JWR, Roelen CAM.	2020	Development of Prediction Models for Sickness Absence Due to Mental Disorders in the General Working Population	n	n	n	n	n	n	n	y	n		10.1371/journal.pone.0103078
van't2020	Van't Hof E, Sangraula M, Luitel NP, Turner EL, Marahatta K, van Ommeren M, Shrestha P, Bryant R, Kohrt BA, Jordans MJD.	2020	Effectiveness of Group Problem Management Plus (Group-PM+) for adults affected by humanitarian crises in Nepal: study protocol for a cluster randomized controlled trial	n	n	n	n	n	n	n	y	n		10.3389/fnbeh.2018.00230
veenema2017	Veenema TG, Thornton CP, Lavin RP, Bender AK, Seal S, Corley A.	2017	Climate Change-Related Water Disasters' Impact on Population Health	n	n	n	n	n	n	n	y	n		10.1080/10530789.2020.1753914
ventriglio2020	Ventriglio A, Torales J, Castaldelli-Maia JM, De Berardis D, Bhugra D.	2020	Urbanization and emerging mental health issues	n	n	n	n	n	n	n	y	n		10.1186/1471-2458-14-708
vergara2018	Vergara, German	2018	How Coal Kept My Valley Green: Forest Conservation, State Intervention, and the Transition to Fossil Fuels in Mexico	n	n	n	n	n	n	n	y	n		x
verhey2013	Verhey F, de Vugt M.	2013	Mild cognitive impairment is becoming more psychosocial	n	n	n	n	n	n	n	y	n		x
verner2016	Verner G, Sch??tte S, Knop J, Sankoh O, Sauerborn R.	2016	Health in climate change research from 1990 to 2014: positive trend, but still underperforming	n	n	n	n	n	n	n	y	n		10.4103/0019-5545.69254
verplanken2013	Verplanken B, Roy D.	2013	"My worries are rational, climate change is not": habitual ecological worrying is an adaptive response	n	n	n	n	n	n	n	y	n		10.1017/thg.2012.6
vert2017	Vert C, S?Ýnchez-Benavides G, Mart?ínez D, Gotsens X, Gramunt N, Cirach M, Molinuevo JL, Sunyer J, Nieuwenhuijsen MJ, Crous-Bou M, Gascon M.	2017	Effect of long-term exposure to air pollution on anxiety and depression in adults: A cross-sectional study	n	n	n	n	n	n	n	y	n		10.1002/brb3.1384
vickery2010	Vickery K.	2010	Widening the Psychiatric gaze: reflections on PsychoDoctor, depression, and recent transitions in japanese mental health care	n	n	n	n	n	n	n	y	n		10.3390/atmos10040182
vida2011	Vida S.	2011	[Vulnerability to environmental heat among persons with mental health problems]	n	n	n	n	n	n	n	y	n		10.1136/bmjopen-2019-031233
vida2012	Vida S, Durocher M, Ouarda TB, Gosselin P.	2012	Relationship between ambient temperature and humidity and visits to mental health emergency departments in Qu?«bec	n	n	n	n	n	n	n	y	n		10.1016/j.puhe.2019.09.005
vincent2018	Vincent, Grace E.; Aisbett, Brad; Wolkow, Alexander; Jay, Sarah M.; Ridgers, Nicola D.; Ferguson, Sally A.	2018	Sleep in wildland firefighters: what do we know and why does it matter?	n	n	n	n	n	n	n	y	n		10.1016/j.envpol.2016.07.011
vincett2018	Vincett, Joanne	2018	Researcher self-care in organizational ethnography: Lessons from overcoming compassion fatigue	n	n	n	n	n	n	n	y	n		10.5694/mja18.00624
visagie2017	Visagie S, Eide AH, Dyrstad K, Mannan H, Swartz L, Schneider M, Mji G, Munthali A, Khogali M, van Rooy G, Hem KG, MacLachlan M.	2017	Factors related to environmental barriers experienced by persons with and without disabilities in diverse African settings	n	n	n	n	n	n	n	y	n		10.1145/3267305.3267683
vogel2018	Vogel, Christina; Ripken, Malena; Klenke, Thomas	2018	Linking Marine Ecosystem Services to the North Sea's Energy Fields in Transnational Marine Spatial Planning	n	n	n	n	n	n	n	y	n		10.1016/j.bbi.2019.07.020
voltas2013	Voltas Moreso, Nuria; Hernandez-Martinez, Carmen; Arija Val, Victoria; Canals Sans, Josefa	2013	Socio-demographic and psychopathological risk factors in obsessive-compulsive disorder: Epidemiologic study of school population	n	n	n	n	n	n	n	y	n		10.1097/YPG.0b013e3283437250
von2013	von Lindern, Eike; Bauer, Nicole; Frick, Jacqueline; Hunziker, Marcel; Hartig, Terry	2013	Occupational engagement as a constraint on restoration during leisure time in forest settings	n	n	n	n	n	n	n	y	n		10.1007/s10071-018-1207-x
vossoughi2015	Vossoughi, M.; Vierkotter, A.; Sugiri, D.; Probst-Hensch, N.; Stolz, S.; Luckhaus, C.; Huls, A.; Ranft, U.; Kramer, U.; Schikowski, T.	2015	The Roles Of Lung Function And Air Pollution On Cognitive Decline: Predictor And Mediator?	n	n	n	n	n	n	n	y	n		10.3390/ijerph16010087
vrotsou2017	Vrotsou, Katerina; Andersson, Gunnel; Ellegard, Kajsa; Stefansson, Claes-Goran; Topor, Alain; Denhov, Anne; Bulow, Per	2017	A time-geographic approach for visualizing the paths of intervention for persons with severe mental illness	n	n	n	n	n	n	n	y	n		10.1111/jcpp.13084
vujcic2017	Vujcic M, Tomicevic-Dubljevic J, Grbic M, Lecic-Tosevski D, Vukovic O, Toskovic O.	2017	Nature based solution for improving mental health and well-being in urban areas	n	n	n	n	n	n	n	y	n		10.1007/s11432-010-0014-z
wade2015	Wade D, Crompton D, Howard A, Stevens N, Metcalf O, Brymer M, Ruzek J, Watson P, Bryant R, Forbes D.	2015	Skills for Psychological Recovery: Evaluation of a post-disaster mental health training program	n	n	n	n	n	n	n	y	n		10.2220/biomedres.39.241
wagner2016	Wagner GJ, Ngo V, Goutam P, Glick P, Musisi S, Akena D.	2016	A Structured Protocol Model of Depression Care versus Clinical Acumen: A Cluster Randomized Trial of the Effects on Depression Screening, Diagnostic Evaluation, and Treatment Uptake in Ugandan HIV Clinics	n	n	n	n	n	n	n	y	n		10.3390/medsci7010007
wagner2016a	Wagner G, Ghosh-Dastidar B, Ngo V, Robinson E, Musisi S, Glick P, Dickens A.	2016	A cluster randomized controlled trial of two task-shifting depression care models on depression alleviation and antidepressant response among HIV clients in Uganda	n	n	n	n	n	n	n	y	n		10.7448/IAS.17.1.19041
waite2017	Waite TD, Chaintarli K, Beck CR, Bone A, Aml??t R, Kovats S, Reacher M, Armstrong B, Leonardi G, Rubin GJ, Oliver I.	2017	The English national cohort study of flooding and health: cross-sectional analysis of mental health outcomes at year one	n	n	n	n	n	n	n	y	n		10.2147/AMEP.S14027
walsh2019	Walsh-Messinger J, Jiang H, Lee H, Rothman K, Ahn H, Malaspina D.	2019	Relative importance of symptoms, cognition, and other multilevel variables for psychiatric disease classifications by machine learning	n	n	n	n	n	n	n	y	n		10.1186/s13030-015-0039-z
walters2014	Walters, A. Brooke; Drescher, Christopher F.; Baczwaski, Brandy J.; Aiena, Bethany J.; Darden, Marie C.; Johnson, Laura R.; Buchanan, Erin M.; Schulenberg, Stefan E.	2014	Getting Active in the Gulf: Environmental Attitudes and Action Following Two Mississippi Coastal Disasters	n	n	n	n	n	n	n	y	n		10.1016/j.genhosppsych.2013.03.021
walton2018	Walton EL.	2018	Tainted air: The link between pollution and Alzheimer's disease	n	n	n	n	n	n	n	y	n		10.1080/13651501.2016.1276192
wan2013	Wan, Chao; Liu, Wei	2013	The Comparative Study of Tree Drawing Test on Chinese College Students and African Students	n	n	n	n	n	n	n	y	n		x
wang2010	Wang HH, Zhang ZJ, Tan QR, Yin H, Chen YC, Wang HN, Zhang RG, Wang ZZ, Guo L, Tang LH, Li LJ.	2010	Psychopathological, biological, and neuroimaging characterization of posttraumatic stress disorder in survivors of a severe coalmining disaster in China	n	n	n	n	n	n	n	y	n		10.2196/10140
wang2015	Wang S, Paul MJ, Dredze M.	2015	Social media as a sensor of air quality and public response in China	n	n	n	n	n	n	n	y	n		x
wang2015a	Wang, Zhaoyu; Huang, Chunjia; Zheng, Guozhong	2015	The influence of fan system and air conditioner on indoor particles in university dormitories	n	n	n	n	n	n	n	y	n		10.1186/s40352-017-0049-y
wang2016	Wang Q, Yang Z.	2016	Industrial water pollution, water environment treatment, and health risks in China	n	n	n	n	n	n	n	y	n		10.1177/1049731515579074
wang2017	Wang, Bojie; Tang, Haiping; Xu, Ying	2017	Perceptions of human well-being across diverse respondents and landscapes in a mountain-basin system, China	n	n	n	n	n	n	n	y	n		10.1097/NNE.0000000000000525
wang2017a	Wang P, Tuvblad C, Younan D, Franklin M, Lurmann F, Wu J, Baker LA, Chen JC.	2017	Socioeconomic disparities and sexual dimorphism in neurotoxic effects of ambient fine particles on youth IQ: A longitudinal analysis	n	n	n	n	n	n	n	y	n		10.1038/npp.2017.162
wang2017b	Wang Y, Iyengar V, Hu J, Kho D, Falconer E, Docherty JP, Yuen GY.	2017	Predicting Future High-Cost Schizophrenia Patients Using High-Dimensional Administrative Data	n	n	n	n	n	n	n	y	n		10.1176/appi.ajp.2018.18020169
wang2018	Wang Q, Yang Z.	2018	Does chronic disease influence susceptibility to the effects of air pollution on depressive symptoms in China?	n	n	n	n	n	n	n	y	n		10.1017/S0033291719000163
wang2018a	Wang R, Xue D, Liu Y, Liu P, Chen H.	2018	The Relationship between Air Pollution and Depression in China: Is Neighbourhood Social Capital Protective?	n	n	n	n	n	n	n	y	n		10.1155/2012/507464
wang2018b	Wang, Ying	2018	Analysis and Reference of the Public Hazards Prevention Agreement	n	n	n	n	n	n	n	y	n		10.2196/16399
wang2019	Wang R, Helbich M, Yao Y, Zhang J, Liu P, Yuan Y, Liu Y.	2019	Urban greenery and mental wellbeing in adults: Cross-sectional mediation analyses on multiple pathways across different greenery measures	n	n	n	n	n	n	n	y	n		10.1007/s11869-015-0351-6
wang2019a	Wang R, Liu Y, Xue D, Yao Y, Liu P, Helbich M.	2019	Cross-sectional associations between long-term exposure to particulate matter and depression in China: The mediating effects of sunlight, physical activity, and neighborly reciprocity	n	n	n	n	n	n	n	y	n		10.1080/01488376.2018.1481174
wang2019d	Wang, Baowei; Kong, Weiwen; Guan, Hui; Xiong, Neal N.	2019	Air Quality Forecasting Based on Gated Recurrent Long Short Term Memory Model in Internet of Things	n	n	n	n	n	n	n	y	n		10.1057/palcomms.2015.19
wang2020	Wang R, Yang B, Liu P, Zhang J, Liu Y, Yao Y, Lu Y.	2020	The longitudinal relationship between exposure to air pollution and depression in older adults	n	n	n	n	n	n	n	y	n		10.1073/pnas.1508593112
wang2020a	Wang S, Jiang J, Zhou Y, Li J, Zhao D, Lin S.	2020	Climate-change information, health-risk perception and residents' environmental complaint behavior: an empirical study in China	n	n	n	n	n	n	n	y	n		10.1016/j.euroneuro.2013.01.006
wang2020b	Wang R, Yang B, Yao Y, Bloom MS, Feng Z, Yuan Y, Zhang J, Liu P, Wu W, Lu Y, Baranyi G, Wu R, Liu Y, Dong G.	2020	Residential greenness, air pollution and psychological well-being among urban residents in Guangzhou, China	n	n	n	n	n	n	n	y	n		10.1136/bmjopen-2019-036607
wang2020c	Wang P, Goggins WB, Zhang X, Ren C, Lau KK.	2020	Association of urban built environment and socioeconomic factors with suicide mortality in high-density cities: A case study of Hong Kong	n	n	n	n	n	n	n	y	n		10.2196/17712
wang2020d	Wang L, Qiao Y, Zhang H, Zhang Y, Hua J, Jin S, Liu G.	2020	Circulating Vitamin D Levels and Alzheimer's Disease: A Mendelian Randomization Study in the IGAP and UK Biobank	n	n	n	n	n	n	n	y	n		10.1016/j.bpsc.2017.12.004
ward2019	Ward Thompson C, Silveirinha de Oliveira E, Tilley S, Elizalde A, Botha W, Briggs A, Cummins S, Leyland AH, Roe JJ, Aspinall P, Brookfield K, Mitchell R.	2019	Health impacts of environmental and social interventions designed to increase deprived communitiesÈÃÍ access to urban woodlands: a mixed-methods study	n	n	n	n	n	n	n	y	n		10.1080/19406940.2017.1359201
warsini2014	Warsini, Sri; Mills, Jane; Usher, Kim	2014	Solastalgia: Living with the Environmental Damage Caused By Natural Disasters	n	n	n	n	n	n	n	y	n		10.1093/pubmed/fdu102
wasiak2013	Wasiak J, Mahar P, Lee S, Paul E, Spinks A, Pfitzer B, Cleland H, Gabbe B.	2013	12-month generic health status and psychological distress outcomes following an Australian natural disaster experience: 2009 Black Saturday Wildfires	n	n	n	n	n	n	n	y	n		10.1136/bmjopen-2017-016638
wass2019	Wass SV, Smith CG, Daubney KR, Suata ZM, Clackson K, Begum A, Mirza FU.	2019	Influences of environmental stressors on autonomic function in 12-month-old infants: understanding early common pathways to atypical emotion regulation and cognitive performance	n	n	n	n	n	n	n	y	n		10.3390/ijerph17093089
watkiss2012	Watkiss, Paul; Hunt, Alistair	2012	Projection of economic impacts of climate change in sectors of Europe based on bottom up analysis: human health	n	n	n	n	n	n	n	y	n		10.1186/1757-4749-5-3
watson2020	Watson C, Nieuwenhuijsen MJ, Triguero-Mas M, Cirach M, Maas J, Gidlow C, Kruize H, Andrusaityte S, Grazuleviciene R, Zijlema WL.	2020	The association between natural outdoor environments and common somatic symptoms	n	n	n	n	n	n	n	y	n		10.1007/s10615-020-00763-y
webster2015	Webster, C., Sarkar, C., Melbourne, S.J., Pryor, M., Tang, D. and Kafafy, N	2015	GREEN EQUALS HEALTHY? TOWARDS AN EVIDENCE BASE FOR HIGH DENSITY HEALTHY CITY RESEARCH	n	n	n	n	n	n	n	y	n		10.1186/s12888-016-0898-2
wei2020	Wei Q, Zhang X, Yi W, Pan R, Gao J, Duan J, Xu Z, Cheng Q, Bai L, Zhang Y, Su H.	2020	Association between floods and hospital admissions for schizophrenia in Hefei, China: The lag effects of degrees of floods and time variation	n	n	n	n	n	n	n	y	n		10.1371/journal.pone.0167055
weiss2020	Weiss B, Dang HM, Lam TT, Nguyen MC.	2020	Urbanization, and child mental health and life functioning in Vietnam: implications for global health disparities	n	n	n	n	n	n	n	y	n		10.1016/j.cpr.2020.101841
weissler2018	Weissler JM, Chang BL, Carney MJ, Rengifo D, Messa CA 4th, Sarwer DB, Percec I.	2018	Gender-Affirming Surgery in Persons with Gender Dysphoria	n	n	n	n	n	n	n	y	n		10.1109/JBHI.2018.2883751
weisz2013	Weisz JR, Ugueto AM, Cheron DM, Herren J.	2013	Evidence-based youth psychotherapy in the mental health ecosystem	n	n	n	n	n	n	n	y	n		10.1007/s10615-009-0205-5
weisz2019	Weisz, John R.; Kuppens, Sofie; Ng, Mei Yi; Vaughn-Coaxum, Rachel A.; Ugueto, Ana M.; Eckshtain, Dikla; Corteselli, Katherine A.	2019	Are Psychotherapies for Young People Growing Stronger? Tracking Trends Over Time for Youth Anxiety, Depression, Attention-Deficit/Hyperactivity Disorder, and Conduct Problems	n	n	n	n	n	n	n	y	n		10.3390/ijerph14070786
weuve2012	Weuve J, Puett RC, Schwartz J, Yanosky JD, Laden F, Grodstein F.	2012	Exposure to particulate air pollution and cognitive decline in older women	n	n	n	n	n	n	n	y	n		10.1016/j.dcn.2018.02.002
weuve2012a	Weuve J, Yanosky JD.	2012	Polycyclic aromatic hydrocarbons, particulate air pollution, and cognitive decline-reply	n	n	n	n	n	n	n	y	n		10.1111/cpsp.12000
wheeler2018	Wheeler, Sarah Ann; Zuo, Alec; Loch, Adam	2018	Water torture: Unravelling the psychological distress of irrigators in Australia	n	n	n	n	n	n	n	y	n		10.1093/geronb/gby054
white2013	White MP, Alcock I, Wheeler BW, Depledge MH.	2013	Coastal proximity, health and well-being: results from a longitudinal panel survey	n	n	n	n	n	n	n	y	n		10.1007/s00484-018-1605-4
white2020a	White RG.	2020	Mental wellbeing in the Anthropocene: Socio-ecological approaches to capability enhancement	n	n	n	n	n	n	n	y	n		10.1145/3267305.3267537
wigger2013	Wigger, J. Bradley; Paxson, Katrina; Ryan, Lacey	2013	What Do Invisible Friends Know? Imaginary Companions, God, and Theory of Mind	n	n	n	n	n	n	n	y	n		10.4028/www.scientific.net/AMR.518-523.928
wildeman2010	Wildeman C, Western B.	2010	Incarceration in fragile families	n	n	n	n	n	n	n	y	n		10.4028/www.scientific.net/AMR.712-715.803
wiley2019	Wiley, Elizabeth	2019	The unseen impacts of climate change on mental health	n	n	n	n	n	n	n	y	n		10.1093/aje/kwp429
wilkinson2011	Wilkinson, Beverly	2011	Current Trends in Remediating Adolescent Self-Injury: An Integrative Review	n	n	n	n	n	n	n	y	n		10.1093/aje/kwu342
william2019	William, Jananie; Chojenta, Catherine; Martin, Michael A.; Loxton, Deborah	2019	An actuarial investigation into maternal out-of-hospital cost risk factors	n	n	n	n	n	n	n	y	n		10.1093/aje/kwu153
williams2012	Williams S, Nitschke M, Sullivan T, Tucker GR, Weinstein P, Pisaniello DL, Parton KA, Bi P.	2012	Heat and health in Adelaide, South Australia: assessment of heat thresholds and temperature relationships	n	n	n	n	n	n	n	y	n		10.1186/1687-9856-2014-8
willis2016	Willis, Ken; Crabtree, Bob; Osman, Liesl M.; Cathrine, Kirsty	2016	Green space and health benefits: a QALY and CEA of a mental health programme	n	n	n	n	n	n	n	y	n		10.1111/jgs.15394
willox2013	Willox, Ashlee Cunsolo; Harper, Sherilee L.; Ford, James D.; Edge, Victoria L.; Landman, Karen; Houle, Karen; Blake, Sarah; Wolfrey, Charlotte	2013	Climate change and mental health: an exploratory case study from Rigolet, Nunatsiavut, Canada	n	n	n	n	n	n	n	y	n		10.1093/ageing/afv087
willox2015	Willox, Ashlee Cunsolo; Stephenson, Eleanor; Allen, Jim; Bourque, Francois; Drossos, Alexander; Elgaroy, Sigmund; Kral, Michael J.; Mauro, Ian; Moses, Joshua; Pearce, Tristan; MacDonald, Joanna Petrasek; Wexler, Lisa	2015	Examining relationships between climate change and mental health in the Circumpolar North	n	n	n	n	n	n	n	y	n		10.1007/s11069-013-0829-1
willox2016	Willox, Ashlee Cunsolo; Shiwak, Inez; Wood, Michele	2016	Climate change: the next challenge for circumpolar mental health?	n	n	n	n	n	n	n	y	n		10.1002/da.22664
wilson2015	Wilson RL, Wilson GG, Usher K.	2015	Rural Mental Health Ecology: A Framework for Engaging with Mental Health Social Capital in Rural Communities	n	n	n	n	n	n	n	y	n		10.1371/journal.pone.0203353
wind2011	Wind TR, Fordham M, Komproe IH.	2011	Social capital and post-disaster mental health	n	n	n	n	n	n	n	y	n		10.1038/s41598-017-13048-1
wind2012	Wind TR, Komproe IH.	2012	The mechanisms that associate community social capital with post-disaster mental health: a multilevel model	n	n	n	n	n	n	n	y	n		10.1016/j.envint.2019.105205
wind2013	Wind TR, Joshi PC, Kleber RJ, Komproe IH.	2013	The impact of recurrent disasters on mental health: a study on seasonal floods in northern India	n	n	n	n	n	n	n	y	n		10.1371/journal.pone.0125274
wind2014	Wind TR, Joshi PC, Kleber RJ, Komproe IH.	2014	The effect of the postdisaster context on the assessment of individual mental health scores	n	n	n	n	n	n	n	y	n		10.1016/j.socscimed.2012.04.012
wind2018	Wind, Tim R.; Komproe, Ivan H.	2018	Closing the gap between disaster mental health research and practice: evidence for socio-ecological mental health interventions through multilevel research	n	n	n	n	n	n	n	y	n		10.1016/j.neuroimage.2018.05.039
windhorst2015	Windhorst E, Williams A.	2015	"It's like a different world": Natural places, post-secondary students, and mental health	n	n	n	n	n	n	n	y	n		10.1016/j.jsat.2010.03.011
windhorst2016	Windhorst, Eric; Williams, Allison	2016	Bleeding at the roots: Post-secondary student mental health and nature affiliation	n	n	n	n	n	n	n	y	n		10.1016/j.envint.2018.05.044
wingfield2020	Wingfield B, Miller S, Yogarajah P, Kerr D, Gardiner B, Seneviratne S, Samarasinghe P, Coleman S.	2020	A predictive model for paediatric autism screening	n	n	n	n	n	n	n	y	n		10.2174/2215083802666160722160733
wolf2017	Wolf, Lukas J.; zu Ermgassen, Sophus; Balmford, Andrew; White, Mathew; Weinstein, Netta	2017	Is Variety the Spice of Life? An Experimental Investigation into the Effects of Species Richness on Self-Reported Mental Well-Being	n	n	n	n	n	n	n	y	n		10.3389/fpsyg.2014.01395
wolff2016	Wolff J, McCrone P, Patel A, Normann C.	2016	Determinants of per diem Hospital Costs in Mental Health	n	n	n	n	n	n	n	y	n		10.1371/journal.pone.0170225
wolsko2016	Wolsko, Christopher; Marino, Elizabeth	2016	Disasters, migrations, and the unintended consequences of urbanization: What's the harm in getting out of harm's way?	n	n	n	n	n	n	n	y	n		10.1080/00336297.2016.1190284
wong2012	Wong GH, Hui CL, Wong DY, Tang JY, Chang WC, Chan SK, Lee EH, Xu JQ, Lin JJ, Lai DC, Tam W, Kok J, Chung DW, Hung SF, Chen EY.	2012	Developments in early intervention for psychosis in Hong Kong	n	n	n	n	n	n	n	y	n		10.2196/jmir.6957
woodford2017	Woodford, Kimberley M.; Fenton, Lara; Connors, Jacqueline	2017	A Change of Scenery Wilderness Therapy Treatment for Inpatients in Acute Care	n	n	n	n	n	n	n	y	n		10.1016/j.ijdrr.2015.07.011
woodhall2019	Woodhall-Melnik J, Grogan C.	2019	Perceptions of Mental Health and Wellbeing Following Residential Displacement and Damage from the 2018 St. John River Flood	n	n	n	n	n	n	n	y	n		x
woodward2017	Woodward LJ, Lu Z, Morris AR, Healey DM.	2017	Preschool self regulation predicts later mental health and educational achievement in very preterm and typically developing children	n	n	n	n	n	n	n	y	n		10.1071/he11461
wothge2017	Wothge J, Belke C, M?┬hler U, Guski R, Schreckenberg D.	2017	The Combined Effects of Aircraft and Road Traffic Noise and Aircraft and Railway Noise on Noise Annoyance-An Analysis in the Context of the Joint Research Initiative NORAH	n	n	n	n	n	n	n	y	n		10.1037/amp0000228
wright2018	Wright DM, Newell K, Maguire A, O'Reilly D.	2018	Aircraft noise and self-assessed mental health around a regional urban airport: a population based record linkage study	n	n	n	n	n	n	n	y	n		10.1016/j.parkreldis.2019.06.025
wshah2019	Wshah S, Skalka C, Price M.	2019	Predicting Posttraumatic Stress Disorder Risk: A Machine Learning Approach	n	n	n	n	n	n	n	y	n		10.1192/bjpo.bp.116.002923
wu2014	Wu CD, McNeely E, Cede??o-Laurent JG, Pan WC, Adamkiewicz G, Dominici F, Lung SC, Su HJ, Spengler JD.	2014	Linking student performance in Massachusetts elementary schools with the "greenness" of school surroundings using remote sensing	n	n	n	n	n	n	n	y	n		10.3390/ijerph16234849
Wu2015a	Wu YC, Lin YC, Yu HL, Chen JH, Chen TF, Sun Y, Wen LL, Yip PK, Chu YM, Chen YC.	2015	Association between air pollutants and dementia risk in the elderly	n	n	n	n	n	n	n	y	n		10.1186/s13011-020-00268-4
wu2015a	Wu YT, Prina AM, Jones A, Matthews FE, Brayne C; MRC CFAS.	2015	Older people, the natural environment and common mental disorders: cross-sectional results from the Cognitive Function and Ageing Study	n	n	n	n	n	n	n	y	n		10.1177/0193945909343594
wu2019	Wu J, Huang C, Pang M, Wang Z, Yang L, FitzGerald G, Zhong S.	2019	Planned sheltering as an adaptation strategy to climate change: Lessons learned from the severe flooding in Anhui Province of China in 2016	n	n	n	n	n	n	n	y	n		10.1111/1753-6405.12369
wu2019b	Wu CD.	2019	[Application of Geospatial Information Technologies in Assessing Changes in Regional Health Risks Related to Climate Change]	n	n	n	n	n	n	n	y	n		10.1007/s12031-011-9619-y
wu2020	Wu Z, Chen X, Li G, Tian L, Wang Z, Xiong X, Yang C, Zhou Z, Pan X.	2020	Attributable risk and economic cost of hospital admissions for mental disorders due to PM(2.5) in Beijing	n	n	n	n	n	n	n	y	n		10.1016/j.healthplace.2017.05.017
xie2015	Xie Z, Poon AN, Wu Z, Jian W, Chan KY.	2015	Is occupation a good predictor of self-rated health in China?	n	n	n	n	n	n	n	y	n		10.9778/cmajo.20170111
xu2012	Xu, Yumei; Sun, Kechun	2012	Investigation and Assessment on Perceive Air Quality of Dormitory Building	n	n	n	n	n	n	n	y	n		10.1002/j.2161-1912.2014.00045.x
xu2018	Xu, Ying; Wheeler, Sarah Ann; Zuo, Alec	2018	Will boys' mental health fare worse under a hotter climate in Australia?	n	n	n	n	n	n	n	y	n		x
xue2019	Xue T, Zhu T, Zheng Y, Zhang Q.	2019	Declines in mental health associated with air pollution and temperature variability in China	n	n	n	n	n	n	n	y	n		10.1007/s10461-010-9772-2
xue2019a	Xue T, Zhu T, Zheng Y, Zhang Q.	2019	Author Correction: Declines in mental health associated with air pollution and temperature variability in China	n	n	n	n	n	n	n	y	n	Correction to Xue2019	10.1080/1369183X.2018.1447365
yackerson2014	Yackerson NS, Zilberman A, Todder D, Kaplan Z.	2014	The influence of air-suspended particulate concentration on the incidence of suicide attempts and exacerbation of schizophrenia	n	n	n	n	n	n	n	y	n		10.1590/0102-311X00105714
yadiyal2020	Yadiyal, Aruna; Ruksheda, Syeda	2020	Indian Mental Health Landscape :Where do women stand?	n	n	n	n	n	n	n	y	n		10.1016/j.ijnurstu.2011.05.008
yagi2016	Yagi J, Fujiwara T, Yambe T, Okuyama M, Kawachi I, Sakai A.	2016	Does social capital reduce child behavior problems? Results from the Great East Japan Earthquake follow-up for Children Study	n	n	n	n	n	n	n	y	n		x
yang2010	Yang, Huiqin; Luo, Hongge	2010	Correlation Study between Indoor Air Pollution and Mental Health Status of Inhabitant	n	n	n	n	n	n	n	y	n		10.1109/ISMAR-Adjunct.2019.000-2
yang2019	Yang T, Barnett R, Fan Y, Li L.	2019	The effect of urban green space on uncertainty stress and life stress: A nationwide study of university students in China	n	n	n	n	n	n	n	y	n		x
yau2018	Yau RK, Paschall MJ.	2018	Epidemiology of asphyxiation suicides in the United States, 2005-2014	n	n	n	n	n	n	n	y	n		10.1108/JACPR-11-2018-0391
yazd2019	Yazd, Sahar Daghagh; Wheeler, Sarah Ann; Zuo, Alec	2019	Exploring the Drivers of Irrigator Mental Health in the Murray-Darling Basin, Australia	n	n	n	n	n	n	n	y	n		10.3390/ijerph17103460
yazd2020	Yazd, Sahar Daghagh; Wheeler, Sarah Ann; Zuo, Alec	2020	Understanding the impacts of water scarcity and socio-economic demographics on farmer mental health in the Murray-Darling Basin	n	n	n	n	n	n	n	y	n		10.13075/ijomeh.1896.01417
yedlinsky2019	Yedlinsky NT, Neff LA, Jordan KM.	2019	Care of the Military Veteran: Selected Health Issues	n	n	n	n	n	n	n	y	n		10.1016/j.exger.2017.08.025
yi2018	Yi, Youngmin; Wildeman, Christopher	2018	Can Foster Care Interventions Diminish Justice System Inequality?	n	n	n	n	n	n	n	y	n		10.12927/hcq.2020.26177
yim2013	Yim H, Dennis SJ, Sloutsky VM.	2013	The development of episodic memory: items, contexts, and relations	n	n	n	n	n	n	n	y	n		10.1007/s10488-020-01045-y
yim2020	Yim SJ, Lui LMW, Lee Y, Rosenblat JD, Ragguett RM, Park C, Subramaniapillai M, Cao B, Zhou A, Rong C, Lin K, Ho RC, Coles AS, Majeed A, Wong ER, Phan L, Nasri F, McIntyre RS.	2020	The utility of smartphone-based, ecological momentary assessment for depressive symptoms	n	n	n	n	n	n	n	y	n		10.1289/EHP694
yoda2013	Yoda, T.; Yoshioka, A.; Sakano, N.; Miyatake, N.; Suzue, T.; Hirao, T.	2013	Mental health research for the 2011 flood affected people in Thailand	n	n	n	n	n	n	n	y	n		10.1186/1471-244X-14-107
yoda2017	Yoda T, Yokoyama K, Suzuki H, Hirao T.	2017	Relationship Between Long-term Flooding and Serious Mental Illness After the 2011 Flood in Thailand	n	n	n	n	n	n	n	y	n		10.1016/j.envres.2019.03.005
yohannessen2019	Yohannessen K, Pinto-Galleguillos D, Parra-Giordano D, Agost A, Vald?«s M, Smith LM, Galen K, Arain A, Rojas F, Neitzel RL, Ruiz-Rudolph P.	2019	Health Assessment of Electronic Waste Workers in Chile: Participant Characterization	n	n	n	n	n	n	n	y	n		10.1016/j.whi.2020.05.003
yolton2019	Yolton K, Khoury JC, Burkle J, LeMasters G, Cecil K, Ryan P.	2019	lifetime exposure to traffic-related air pollution and symptoms of depression and anxiety at age 12 years	n	n	n	n	n	n	n	y	n		10.1016/j.forsciint.2018.08.037
yoon2014	Yoon JH, Won JU, Lee W, Jung PK, Roh J.	2014	Occupational noise annoyance linked to depressive symptoms and suicidal ideation: a result from nationwide survey of Korea	n	n	n	n	n	n	n	y	n		10.1016/j.nurpra.2013.06.006
york2014	York Cornwell E.	2014	Social resources and disordered living conditions: evidence from a national sample of community-residing older adults	n	n	n	n	n	n	n	y	n		10.3390/w8080352
yu2016	Yu, Wei-hsin; Chiu, Chi-Tsun	2016	Growing Pains: Changes in Psychological Well-Being in Urban China	n	n	n	n	n	n	n	y	n		10.1162/jocn_a_01584
yu2018	Yu DSF, Ng SSM, Lee DTF, Choi KC, Siu PMF, Low LPL, Woo J.	2018	The effects of an activity-based lifestyle intervention on moderate sleep complaints among older adults: study protocol for a randomized controlled trial	n	n	n	n	n	n	n	y	n		10.3390/environments5060067
yue2020	Yue JL, Liu H, Li H, Liu JJ, Hu YH, Wang J, Lu L, Wang F.	2020	Association between ambient particulate matter and hospitalization for anxiety in China: A multicity case-crossover study	n	n	n	n	n	n	n	y	n		10.1371/journal.pone.0108548
yusa2015	Yusa A, Berry P, J Cheng J, Ogden N, Bonsal B, Stewart R, Waldick R.	2015	Climate Change, Drought and Human Health in Canada	n	n	n	n	n	n	n	y	n		10.3390/w11051092
zacks2020	Zacks JM.	2020	Event Perception and Memory	n	n	n	n	n	n	n	y	n		10.1088/1748-9326/ab7f64
zeller2015	Zeller M, Yuval K, Nitzan-Assayag Y, Bernstein A.	2015	Self-compassion in recovery following potentially traumatic stress: longitudinal study of at-risk youth	n	n	n	n	n	n	n	y	n		10.17269/s41997-018-0070-5
zeng2017	Zeng, Jing; Li, Canwen	2017	The Application of Green Plants in the Interior Space	n	n	n	n	n	n	n	y	n		10.1177/0020764017744582
zenko2019	Zenko, Maja; Menga, Filippo	2019	Linking Water Scarcity to Mental Health: Hydro-Social Interruptions in the Lake Urmia Basin, Iran	n	n	n	n	n	n	n	y	n		10.1007/s10900-014-9894-y
zhang2016	Zhang, Melvyn W. B.; Ho, Roger C. M.; Mcintyre, Roger S.	2016	The 'WikiGuidelines' smartphone application: Bridging the gaps in availability of evidence-based smartphone mental health applications	n	n	n	n	n	n	n	y	n		10.1371/4f7f57285b804
zhang2017a	Zhang X, Zhang X, Chen X.	2017	Happiness in the Air: How Does a Dirty Sky Affect Mental Health and Subjective Well-being?	n	n	n	n	n	n	n	y	n		10.1016/j.healthplace.2019.102273
zhang2018	Zhang X, Chen X, Zhang X.	2018	The impact of exposure to air pollution on cognitive performance	n	n	n	n	n	n	n	y	n		x
zhang2018b	Zhang Y, Beggs PJ, Bambrick H, Berry HL, Linnenluecke MK, Trueck S, Alders R, Bi P, Boylan SM, Green D, Guo Y, Hanigan IC, Hanna EG, Malik A, Morgan GG, Stevenson M, Tong S, Watts N, Capon AG.	2018	The MJA-Lancet Countdown on health and climate change: Australian policy inaction threatens lives	n	n	n	n	n	n	n	y	n		10.1523/JNEUROSCI.4013-13.2014
zhang2019	Zhang CJP, Barnett A, Johnston JM, Lai PC, Lee RSY, Sit CHP, Cerin E.	2019	Objectively-Measured Neighbourhood Attributes as Correlates and Moderators of Quality of Life in Older Adults with Different Living Arrangements: The ALECS Cross-Sectional Study	n	n	n	n	n	n	n	y	n		10.1016/j.envres.2017.08.031
zhang2019a	Zhang W, Zhang L, Chen L, Ji L, Deater-Deckard K.	2019	Developmental changes in longitudinal associations between academic achievement and psychopathological symptoms from late childhood to middle adolescence	n	n	n	n	n	n	n	y	n		10.3390/ijerph14090957
zhang2020b	Zhang W, Liu H, Silenzio VMB, Qiu P, Gong W.	2020	Machine Learning Models for the Prediction of Postpartum Depression: Application and Comparison Based on a Cohort Study	n	n	n	n	n	n	n	y	n		10.1111/bjdp.12218
zhao2020	Zhao Y, Hoenig JM, Protacio A, Lim S, Norman CC.	2020	Identification of risk factors for early psychiatric rehospitalization	n	n	n	n	n	n	n	y	n		10.1016/j.jad.2012.05.021
zhou2019a	Zhou M, Wang H, Zeng X, Yin P, Zhu J, Chen W, Li X, Wang L, Wang L, Liu Y, Liu J, Zhang M, Qi J, Yu S, Afshin A, Gakidou E, Glenn S, Krish VS, Miller-Petrie MK, Mountjoy-Venning WC, Mullany EC, Redford SB, Liu H, Naghavi M, Hay SI, Wang L, Murray CJL, Liang X.	2019	Mortality, morbidity, and risk factors in China and its provinces, 1990-2017: a systematic analysis for the Global Burden of Disease Study 2017	n	n	n	n	n	n	n	y	n		10.1016/j.socscimed.2020.113108
zhou2020a	Zhou, Yishu; Liu, Jingyi	2020	Air Pollution and Mental Health of Older Adults in China	n	n	n	n	n	n	n	y	n		10.1007/s11524-013-9849-0
zhu2020	Zhu X, Gao M, Zhao W, Ge T.	2020	Does the Presence of Birdsongs Improve Perceived Levels of Mental Restoration from Park Use? Experiments on Parkways of Harbin Sun Island in China	n	n	n	n	n	n	n	y	n		10.1016/j.scitotenv.2018.02.011
ziegler2017	Ziegler C, Morelli V, Fawibe O.	2017	Climate Change and Underserved Communities	n	n	n	n	n	n	n	y	n		10.1212/WNL.0000000000009314
ziegler2019	Ziegler, Carol; Morelli, Vincent; Fawibe, Omotayo	2019	Climate Change and Underserved Communities	n	n	n	n	n	n	n	y	n		10.1371/journal.pone.0195607
ziemelniece2019	Ziemelniece, Aija; Balode, Linda	2019	The transformation of the cultural landscape of Latvian rehabilitation gardens and parks	n	n	n	n	n	n	n	y	n		x
zijlema2016	Zijlema WL, Wolf K, Emeny R, Ladwig KH, Peters A, Kongsg?Ðrd H, Hveem K, Kval?®y K, Yli-Tuomi T, Partonen T, Lanki T, Eeftens M, de Hoogh K, Brunekreef B; BioSHaRE, Stolk RP, Rosmalen JG.	2016	The association of air pollution and depressed mood in 70,928 individuals from four European cohorts	n	n	n	n	n	n	n	y	n		10.1016/j.envint.2019.105440
zijlema2017	Zijlema WL, Triguero-Mas M, Smith G, Cirach M, Martinez D, Dadvand P, Gascon M, Jones M, Gidlow C, Hurst G, Masterson D, Ellis N, van den Berg M, Maas J, van Kamp I, van den Hazel P, Kruize H, Nieuwenhuijsen MJ, Julvez J.	2017	The relationship between natural outdoor environments and cognitive functioning and its mediators	n	n	n	n	n	n	n	y	n		10.1016/j.envres.2018.01.012
zock2018	Zock JP, Verheij R, Helbich M, Volker B, Spreeuwenberg P, Strak M, Janssen NAH, Dijst M, Groenewegen P.	2018	The impact of social capital, land use, air pollution and noise on individual morbidity in Dutch neighbourhoods	n	n	n	n	n	n	n	y	n		10.1007/s40572-020-00264-7
zubaran2013	Zubaran C, Foresti K, de Moore G.	2013	Aborigines, colonizers and newcomers: the landscape of transcultural psychiatry research in Australia	n	n	n	n	n	n	n	y	n		10.1377/hlthaff.2017.1524
abbing2018	Abbing A, Ponstein A, van Hooren S, de Sonneville L, Swaab H, Baars E.	2018	The effectiveness of art therapy for anxiety in adults: A systematic review of randomised and non-randomised controlled trials	n	y	y	n	n	n	n	n	n		10.1017/dmp.2020.87
abdul2013	Abdul Manan H, Yusoff AN, Franz EA, Sarah Mukari SZ.	2013	Early and Late Shift of Brain Laterality in STG, HG, and Cerebellum with Normal Aging during a Short-Term Memory Task	n	y	n	n	n	n	n	n	n		10.3389/fpsyt.2020.00448
abella2018	Abella, Adela	2018	Can psychoanalysis contribute to the understanding of fundamentalism? An introduction to a vast question	n	y	n	n	n	n	n	n	n		10.1016/j.aogh.2016.01.013
abootalebi2018	Abootalebi, Hassan	2018	Paranoia and its ensuing effects in Ken Kesey's One Flew over the Cuckoo's Nest	y	y	n	n	n	n	n	n	n		10.1080/13607863.2014.941325
aboujaoude2020	Aboujaoude E.	2020	Where Life Coaching Ends and Therapy Begins: Toward a Less Confusing Treatment Landscape	n	y	n	n	n	n	n	n	n		10.1186/s12992-014-0077-5
acharjee2017	Acharjee A, Prentice P, Acerini C, Smith J, Hughes IA, Ong K, Griffin JL, Dunger D, Koulman A.	2017	The translation of lipid profiles to nutritional biomarkers in the study of infant metabolism	y	y	n	n	n	n	n	n	n		10.1016/j.rasd.2018.05.004
adak2019	Adak, Atanu; Khan, Mojibur R.	2019	An insight into gut microbiota and its functionalities	y	y	n	n	n	n	n	n	n		10.2165/11593040-000000000-00000
adam2013	Adam S, Bonsang E, Grotz C, Perelman S.	2013	Occupational activity and cognitive reserve: implications in terms of prevention of cognitive aging and Alzheimer's disease	n	y	n	n	n	n	n	n	n		10.1136/archdischild-2012-301863
adatia2014	Adatia S, Law S, Haggerty J.	2014	Room for improvement: noise on a maternity ward	n	y	n	n	n	n	n	n	n		10.1080/01426397.2016.1197192
adelantado2019	Adelantado-Renau M, Esteban-Cornejo I, Rodriguez-Ayllon M, Cadenas-Sanchez C, Gil-Cosano JJ, Mora-Gonzalez J, Solis-Urra P, Verdejo-Rom?Ýn J, Aguilera CM, Escolano-Margarit MV, Verdejo-Garcia A, Catena A, Moliner-Urdiales D, Ortega FB.	2019	Inflammatory biomarkers and brain health indicators in children with overweight and obesity: The ActiveBrains project	y	y	n	n	n	n	n	n	n		10.1080/0075417X.2018.1502337
adgent2014	Adgent MA, Hoffman K, Goldman BD, Sj?┬din A, Daniels JL.	2014	Brominated flame retardants in breast milk and behavioural and cognitive development at 36 months	n	y	n	n	n	n	n	n	n		10.2979/ethicsenviro.23.1.01
afe2016	Afe TO, Emedoh TC, Ogunsemi O, Adegbohun AA.	2016	Intimate partner violence, psychopathology and the women with schizophrenia in an outpatient clinic South-South, Nigeria	n	y	n	n	n	n	n	n	n		10.30773/pi.2018.01.14
agorastos2019	Agorastos A, Bozikas VP.	2019	Gut microbiome and adaptive immunity in schizophrenia	n	y	n	n	n	n	n	n	n		10.1136/bmjquality.u207447.w4214
agrawal2020	Agrawal Y, Smith PF, Rosenberg PB.	2020	Vestibular impairment, cognitive decline and Alzheimer's disease: balancing the evidence	n	y	n	n	n	n	n	n	n		10.1016/j.artmed.2019.101704
ahola2010	Ahola K, V?±?±n?±nen A, Koskinen A, Kouvonen A, Shirom A.	2010	Burnout as a predictor of all-cause mortality among industrial employees: a 10-year prospective register-linkage study	n	y	n	n	n	n	n	n	n		10.1016/j.neuroimage.2014.10.002
aichele2018	Aichele S, Rabbitt P, Ghisletta P.	2018	Cardiovascular symptoms and longitudinal declines in processing speed differentially predict cerebral white matter lesions in older adults	y	y	n	n	n	n	n	n	n		10.1080/17538157.2017.1399132
alcantara2020	Alcantara J, Whetten A, Ohm J, Alcantara J.	2020	The relationship between quality of life and sense of coherence in patients presenting for care in a chiropractic practice-based research network	n	y	n	n	n	n	n	n	n		10.1017/S0033291719000151
aleksandrov2015	Aleksandrov, Ivan; Arnaudova, Mariana; Stoyanov, Valery; Ivanova, Veronika; Petrov, Petar Y.	2015	ON PSYCHOLOGICAL AND PSYCHIATRIC IMPACT OF PIRACY ON SEAFARERS	n	y	n	n	n	n	n	n	n		10.3233/978-1-61499-289-9-1024
allahbakhshi2019	Allahbakhshi H, Hinrichs T, Huang H, Weibel R.	2019	The Key Factors in Physical Activity Type Detection Using Real-Life Data: A Systematic Review	n	n	y	n	n	n	n	n	n		10.1371/journal.pone.0209909
allen2015	Allen, Priscilla D.; D'Elia, Christopher F.	2015	What Lies Beneath: the BP Oil Spill and the Need for New Response Models	y	n	n	n	n	n	n	n	n		10.2196/15516
allison2014	Allison SM, Adams D, Klindera KC, Poteat T, Wolf RC.	2014	Innovative uses of communication technology for HIV programming for men who have sex with men and transgender persons	y	y	n	n	n	n	n	n	n		x
almakhamreh2018	AlMakhamreh, Sahar Suleiman; Hutchinson, Aisha Jane	2018	Unaccompanied and Separated Syrian Refugee Children: Case Study of a New Feature for Social Work Practice in Jordan	n	y	n	n	n	n	n	n	n		10.1111/add.14504
almutairi2019	Almutairi, Mona; Alhamad, Nada; Alyami, Albandari; Alshubbar, Zainab; Alfayez, Heela; Al-Akkas, Noor; Alhiyafi, Jamal A.; Olatunji, Sunday O.	2019	Preemptive Diagnosis of Schizophrenia Disease Using Computational Intelligence Techniques	n	y	n	n	n	n	n	n	n		10.1016/j.psychres.2016.05.041
alpino2016	Alpino TA, de Sena AR, de Freitas CM.	2016	Disasters related to droughts and public health - a review of the scientific literature	n	n	y	n	n	n	n	n	n		10.1016/j.chc.2018.11.003
altieri2014	Altieri N, Hudock D.	2014	Assessing variability in audiovisual speech integration skills using capacity and accuracy measures	n	y	n	n	n	n	n	n	n		10.1071/AH13002
alvarez2017	Alvarez-Fernandez S, Brown HR, Zhao Y, Raithel JA, Bishop SL, Kern SB, Lord C, Petkova E, Di Martino A.	2017	Perceived social support in adults with autism spectrum disorder and attention-deficit/hyperactivity disorder	n	y	n	n	n	n	n	n	n		10.1145/2839462.2856528
alves2012	Alves GS, O'Dwyer L, Jurcoane A, Oertel-Kn?┬chel V, Kn?┬chel C, Prvulovic D, Sudo F, Alves CE, Valente L, Moreira D, Fu?âer F, Karakaya T, Pantel J, Engelhardt E, Laks J.	2012	Different patterns of white matter degeneration using multiple diffusion indices and volumetric data in mild cognitive impairment and Alzheimer patients	n	y	n	n	n	n	n	n	n		10.1111/eip.12192
ambj2013	Ambj?®rn M, Dubreuil V, Miozzo F, Nigon F, M?®ller B, Issazadeh-Navikas S, Berg J, Lees M, Sap J.	2013	A loss-of-function screen for phosphatases that regulate neurite outgrowth identifies PTPN12 as a negative regulator of TrkB tyrosine phosphorylation	n	y	n	n	n	n	n	n	n		10.1177/0894439320920601
ammerman2017	Ammerman BA, Jacobucci R, Kleiman EM, Muehlenkamp JJ, McCloskey MS.	2017	Development and validation of empirically derived frequency criteria for NSSI disorder using exploratory data mining	n	y	n	n	n	n	n	n	n		10.3389/fneur.2020.00290
amone2013	Amone-P'Olak, Kennedy; Jones, Peter B.; Abbott, Rosemary; Meiser-Stedman, Richard; Ovuga, Emilio; Croudace, Tim J.	2013	Cohort profile: mental health following extreme trauma in a northern Ugandan cohort of War-Affected Youth Study (The WAYS Study)	n	y	n	n	n	n	n	n	n		10.1093/socrel/sru061
andrade2018	Andrade L, O'Dwyer J, O'Neill E, Hynds P.	2018	Surface water flooding, groundwater contamination, and enteric disease in developed countries: A scoping review of connections and?ßconsequences	y	n	y	n	n	n	n	n	n		10.1038/npp.2015.365
andreas2010	Andreas S, Harries-Hedder K, Schwenk W, Hausberg M, Koch U, Schulz H.	2010	Is the Health of the Nation Outcome Scales appropriate for the assessment of symptom severity in patients with substance-related disorders?	n	y	n	n	n	n	n	n	n		10.1007/s10584-019-02382-0
anjomshoa2016	Anjomshoa A, Dolatshahi M, Amirkhani F, Rahmani F, Mirbagheri MM, Aarabi MH.	2016	Structural brain network analysis in schizophrenia using minimum spanning tree	n	y	n	n	n	n	n	n	n		10.1037/pro0000017
anon2019a	anon	2019	Community Water Fluoridation Exposure: A Review of Neurological and Cognitive Effects	n	n	y	n	n	n	n	n	n		10.17269/s41997-020-00328-z
antonelli2016	Antonelli JR, Seltzer R.	2016	Oral and Physical Manifestations of Anorexia and Bulimia Nervosa	n	y	n	n	n	n	n	n	n		10.1089/acm.2019.0281
anzivino2019	Anzivino R, Conti G, Di Nardo W, Fetoni AR, Picciotti PM, Marra C, Guglielmi V, Fortunato S, Forli F, Paludetti G, Berrettini S.	2019	Prospective Evaluation of Cognitive Functions After Rehabilitation With Cochlear Implant or Hearing Aids: Preliminary Results of a Multicentric Study on Elderly Patients	n	y	n	n	n	n	n	n	n		10.1002/dev.21867
arenson2019	Arenson M, Hudson PJ, Lee N, Lai B.	2019	The Evidence on School-Based Health Centers: A Review	n	y	y	n	n	n	n	n	n		10.1007/s10734-019-00489-y
arnold2020	Arnold EA, Fuller SM, Martinez O, Lechuga J, Steward WT.	2020	Documenting best practices for maintaining access to HIV prevention, care and treatment in an era of shifting immigration policy and discourse	y	y	n	n	n	n	n	n	n		10.1007/s11920-018-0921-z
aryana2019	Aryana, Bijan; Brewster, Liz; Nocera, Jose Abdelnour	2019	Design for mobile mental health: an exploratory review	n	n	y	n	n	n	n	n	n		10.1186/s12961-016-0111-6
ashton2018	Ashton BJ, Ridley AR, Edwards EK, Thornton A.	2018	Cognitive performance is linked to group size and affects fitness in Australian magpies	n	y	n	n	n	y	n	n	n		10.1017/thg.2018.35
attademo2017	Attademo L, Bernardini F, Garinella R, Compton MT.	2017	Environmental pollution and risk of psychotic disorders: A review of the science to date	n	n	y	n	n	n	n	n	n		10.1016/j.cortex.2015.02.001
attridge2020	Attridge MD, Morfitt RC, Roseborough DJ, Jones ER.	2020	Internet-Based Cognitive-Behavioral Therapy for College Students With Anxiety, Depression, Social Anxiety, or Insomnia: Four Single-Group Longitudinal Studies of Archival Commercial Data and Replication of Employee User Study	n	y	n	n	n	n	n	n	n		10.3390/ijerph16152662
austin2020	Austin, Emma K.; Rich, Jane L.; Kiem, Anthony S.; Handley, Tonelle; Perkins, David; Kelly, Brian J.	2020	Concerns about climate change among rural residents in Australia	y	n	n	n	n	n	n	n	n		10.1007/s00787-020-01592-7
avecilla2019	Avecilla V, Avecilla A.	2019	Inhibitor of DNA-Binding/Differentiation Proteins and Environmental Toxicants: Genomic Impact on the Onset of Depressive Dysfunction	n	y	n	n	n	n	n	n	n		10.1055/s-0040-1701243
b	Kim TY, Marek KD.	2017	Profiling Patient Characteristics Associated With the Intensity of Nurse Care Coordination	n	y	n	n	n	n	n	n	n		10.1037/h0100165
bach2019	Bach Xuan Tran; Hai Thanh Phan; Latkin, Carl A.; Huong Lan Thi Nguyen; Chi Linh Hoang; Ho, Cyrus S. H.; Ho, Roger C. M.	2019	Understanding Global HIV Stigma and Discrimination: Are Contextual Factors Sufficiently Studied? (GAP(RESEARCH))	y	y	n	n	n	n	n	n	n		10.1007/s00737-016-0669-6
bachmann2010	Bachmann S, Weisbrod M, R?┬hrig M, Schr?┬der J, Thomas C, Scherg M, Rupp A.	2010	MEG does not reveal impaired sensory gating in first-episode schizophrenia	n	y	n	n	n	n	n	n	n		10.1007/s00406-019-01013-0
bade2012	Bade MJ, Wolfe P, Zeni JA, Stevens-Lapsley JE, Snyder-Mackler L.	2012	Predicting poor physical performance after total knee arthroplasty	y	y	n	n	n	n	n	n	n		10.1002/pmh.1474
badida2015	Badida, Miroslav; Borosova, Lenka; Liptai, Pavol; Moravec, Marek; Konkoly, Tomas	2015	MEASUREMENT OF THE SOUND ABSORPTION COEFFICIENT OF MATERIALS USING OF COMBINED SENSOR OF PARTICLE VELOCITY AND ACOUSTIC PRESSURE	y	y	n	n	n	n	n	n	n		10.1080/13648470.2017.1391171
bairy2015	Bairy, G. Muralidhar; Bhat, Shreya; Eugene, Lim Wei Jie; Niranjan, U. C.; Puthankatti, Subha D.; Joseph, Paul K.	2015	Automated Classification of Depression Electroencephalographic Signals Using Discrete Cosine Transform and Nonlinear Dynamics	n	y	n	n	n	n	n	n	n		10.1002/jclp.22232
bairy2017	Bairy, G. Muralidhar; Lih, Oh Shu; Hagiwara, Yuki; Puthankattil, Subha D.; Faust, Oliver; Niranjan, U. C.; Acharya, U. Rajendra	2017	Automated Diagnosis of Depression Electroencephalograph Signals Using Linear Prediction Coding and Higher Order Spectra Features	n	y	n	n	n	n	n	n	n		x
baker2019	Baker FC, Sattari N, de Zambotti M, Goldstone A, Alaynick WA, Mednick SC.	2019	Impact of sex steroids and reproductive stage on sleep-dependent memory consolidation in women	n	y	n	n	n	n	n	n	n		10.1063/1.4983867
balduzzi2019	Balduzzi S, R??cker G, Schwarzer G.	2019	How to perform a meta-analysis with R: a practical tutorial	y	y	n	n	n	n	n	n	n		10.1007/s12640-010-9182-2
balkrishna2018	Balkrishna, Acharya; Misra, Laxminarain	2018	Chemo-botanical and Neurological Accounts of Some Ayurvedic Plants Useful in Mental Health	n	y	n	n	n	n	n	n	n		10.2174/2210676609666191015123100
bandino2015	Bandino JP, Hang A, Norton SA.	2015	The Infectious and Noninfectious Dermatological Consequences of Flooding: A Field Manual for the Responding Provider	y	n	n	n	n	n	n	n	n		10.21091/mppa.2017.4040
baneshi2017	Baneshi MR, Haghdoost AA, Zolala F, Nakhaee N, Jalali M, Tabrizi R, Akbari M.	2017	Can Religious Beliefs be a Protective Factor for Suicidal Behavior? A Decision Tree Analysis in a Mid-Sized City in Iran, 2013	n	y	n	n	n	n	n	n	n		10.1007/s11013-020-09673-7
banhela2017	Banhela, Nkosinathi; Taylor, Myra; Zulu, Siphosenkosi Gift; Strabo, Linnea Sund; Kjetland, Eyrun Floerecke; Gundersen, Svein Gunnar	2017	Environmental factors influencing the distribution and prevalence of Schistosoma haematobium in school attenders of ILembe and uThungulu Health Districts, KwaZulu-Natal Province, South Africa	y	n	n	n	n	n	n	n	n		10.3828/bhs.2009.6
banzhoff2017	Banzhoff S, Del Mar Ropero M, Menzel G, Salmen T, Gross M, Caffier PP.	2017	Medical Issues in Playing the Oboe: A Literature Review	n	y	y	n	n	n	n	n	n		10.1007/s10803-020-04530-3
barnett2019	Barnett S, Huckvale K, Christensen H, Venkatesh S, Mouzakis K, Vasa R.	2019	Intelligent Sensing to Inform and Learn (InSTIL): A Scalable and Governance-Aware Platform for Universal, Smartphone-Based Digital Phenotyping for Research and Clinical Applications	n	y	n	n	n	n	n	n	n		10.1080/14779757.2015.1073608
baron2015	Baron, Andrew S.	2015	Constraints on the Development of Implicit Intergroup Attitudes	y	y	n	n	n	n	n	n	n		10.1016/j.schres.2010.03.007
barrenger2018	Barrenger, Stacey L.; Stanhope, Victoria; Atterbury, Kendall	2018	Challenging Dominant Discourses: Peer Work as Social Justice Work	y	y	n	n	n	n	n	n	n		10.3389/fnagi.2016.00134
bashir2016	Bashir S, Yoo WK.	2016	Neuromodulation for Addiction by Transcranial Direct Current Stimulation: Opportunities and Challenges	n	y	n	n	n	n	n	n	n		10.1038/scientificamerican0717-30
bassett2019	Bassett IV, Xu A, Giddy J, Bogart LM, Boulle A, Millham L, Losina E, Parker RA.	2019	Assessing rates and contextual predictors of 5-year mortality among HIV-infected and HIV-uninfected individuals following HIV testing in Durban, South Africa	y	y	n	n	n	n	n	n	n		10.1111/1440-1630.12190
basso2017	Basso E.	2017	[Complicities and ambivalences of psychiatry: M??nsterlingen and the 1954 feast of fools]	n	y	n	n	n	n	n	n	n		x
batink2016	Batink T, Bakker J, Vaessen T, Kasanova Z, Collip D, van Os J, Wichers M, Germeys I, Peeters F.	2016	Acceptance and Commitment Therapy in Daily Life Training: A Feasibility Study of an mHealth Intervention	n	y	n	n	n	n	n	n	n		10.1016/S2542-5196(20)30081-4
batterham2012	Batterham PJ, Christensen H.	2012	Longitudinal risk profiling for suicidal thoughts and behaviours in a community cohort using decision trees	n	y	n	n	n	n	n	n	n		10.1093/heapro/dar060
batterham2013	Batterham PJ, Calear AL, Sunderland M, Carragher N, Christensen H, Mackinnon AJ.	2013	Hierarchical screening for multiple mental disorders	n	y	n	n	n	n	n	n	n		10.1136/bmjgh-2019-001484
baumeister2015	Baumeister H, Haschke A, Munzinger M, Hutter N, Tully PJ.	2015	Inpatient and outpatient costs in patients with coronary artery disease and mental disorders: a systematic review	n	n	y	n	n	n	n	n	n		10.1097/YCO.0000000000000415
bayetti2017	Bayetti, Clement; Jadhav, Sushrut; Deshpande, Smita N.	2017	How do psychiatrists in India construct their professional identity A critical literature review	n	n	y	n	n	n	n	n	n		10.3390/ijerph17103411
becker2019	Becker-Haimes EM, Okamura KH, Baldwin CD, Wahesh E, Schmidt C, Beidas RS.	2019	Understanding the Landscape of Behavioral Health Pre-service Training to Inform Evidence-Based Intervention Implementation	n	y	n	n	n	n	n	n	n		10.1016/j.adolescence.2016.03.009
beckett2015	Beckett, Celia; Cross, Richard; Hewitt-Taylor, Jaqui; McConnell, Pam	2015	Developing a process for assessment of the emotional and behavioural needs of "looked after" children: the Five Rivers model	n	y	n	n	n	n	n	n	n		x
beckman2015	Beckman L, Svensson M.	2015	The cost-effectiveness of the Olweus Bullying Prevention Program: Results from a modelling study	n	y	n	n	n	n	n	n	n		10.1186/1752-4458-7-8
beidas2016	Beidas RS, Stewart RE, Adams DR, Fernandez T, Lustbader S, Powell BJ, Aarons GA, Hoagwood KE, Evans AC, Hurford MO, Rubin R, Hadley T, Mandell DS, Barg FK.	2016	A Multi-Level Examination of Stakeholder Perspectives of Implementation of Evidence-Based Practices in a Large Urban Publicly-Funded Mental Health System	n	y	n	n	n	n	n	n	n		10.1071/AH17118
beijers2020	Beijers R, Hartman S, Shalev I, Hastings W, Mattern BC, de Weerth C, Belsky J.	2020	Testing three hypotheses about effects of sensitive-insensitive parenting on telomeres	n	y	n	n	n	n	n	n	n		10.1017/S095457941700102X
bein2020	Bein T, Karagiannidis C, Gr??ndling M, Quintel M.	2020	[New challenges for intensive care medicine due to climate change and global warming]	y	n	n	n	n	n	n	n	n		x
bekiroglu2020	Bekiroglu, Korkut; Russell, Michael A.; Lagoa, Constantino; Su, Rong; Sznaier, Mario; Lanza, Stephanie T.; Odgers, Candice L.	2020	Continuous-time model identification: application on a behavioural (miLife) study	y	y	n	n	n	n	n	n	n		10.3389/fpsyt.2019.00683
beletskaya2014	Beletskaya EN, Onul NM, Glavatskaya VI, Antonova EV, Golovkova TA.	2014	[Clinical and hygienic substantiation of individual biocorrection for ecologically dependent conditions in the critical groups of the population of Ukrainian industrial areas]	y	y	n	n	n	n	n	n	n		10.4103/0019-5278.156997
belin2018	Belin L, Formanek L, Heyraud C, Hausberger M, Henry L.	2018	Influence of early experience on processing 2D threatening pictures by European starlings (Sturnus vulgaris)	n	y	n	n	n	y	n	n	n		10.1111/j.1440-1584.2009.01107.x
belsky2018	Belsky DW, Moffitt TE, Cohen AA, Corcoran DL, Levine ME, Prinz JA, Schaefer J, Sugden K, Williams B, Poulton R, Caspi A.	2018	Eleven Telomere, Epigenetic Clock, and Biomarker-Composite Quantifications of Biological Aging: Do They Measure the Same Thing?	n	y	n	n	n	n	n	n	n		10.1136/jech-2017-208899
ben2010	Ben-Porath, Denise D.	2010	Dialectical Behavior Therapy Applied to Parent Skills Training: Adjunctive Treatment for Parents With Difficulties in Affect Regulation	n	y	n	n	n	n	n	n	n		x
bennett2015	Bennett DA, Yu L, Yang J, Srivastava GP, Aubin C, De Jager PL.	2015	Epigenomics of Alzheimer's disease	n	y	n	n	n	n	n	n	n		x
bennett2015a	Bennett, Jeffrey S.	2015	The Blue Army and the Red Scare: Politics, Religion, and Cold War Paranoia	y	y	n	n	n	n	n	n	n		x
berg2016	Berg Brigham K, Darlington M, Wright JS, Lewison G, Kanavos P, Durand-Zaleski I; Mapping_NCD consortium.	2016	Mapping research activity on mental health disorders in Europe: study protocol for the Mapping_NCD project	n	y	y	n	n	n	n	n	n		10.1186/1471-2458-12-177
bergin2011	Bergin M.	2011	NVivo 8 and consistency in data analysis: reflecting on the use of a qualitative data analysis program	y	y	n	n	n	n	n	n	n		x
bernard2014	Bernard S, Proust J, Cl?«ment F.	2014	The medium helps the message: Early sensitivity to auditory fluency in children's endorsement of statements	n	y	n	n	n	n	n	n	n		x
bernstein2011	Bernstein, Daniel M.; Erdfelder, Edgar; Meltzoff, Andrew N.; Peria, William; Loftus, Geoffrey R.	2011	Hindsight Bias From 3 to 95 Years of Age	y	y	n	n	n	n	n	n	n		10.1177/0020764019840060
bested2013	Bested, Alison C.; Logan, Alan C.; Selhub, Eva M.	2013	Intestinal microbiota, probiotics and mental health: from Metchnikoff to modern advances: Part II - contemporary contextual research	n	y	n	n	n	n	n	n	n		10.1177/1039856215609767
bettmann2016	Bettmann, Joanna E.; Gillis, H. L.; Speelman, Elizabeth A.; Parry, Kimber J.; Case, Jonathan M.	2016	A Meta-analysis of Wilderness Therapy Outcomes for Private Pay Clients	n	n	y	n	n	n	n	n	n		10.1093/medlaw/fwr031
betts2020	Betts KS, Kisely S, Alati R.	2020	Predicting postpartum psychiatric admission using a machine learning approach	n	y	n	n	n	n	n	n	n		10.1017/S1049023X12001100
bhak2019	Bhak Y, Jeong HO, Cho YS, Jeon S, Cho J, Gim JA, Jeon Y, Blazyte A, Park SG, Kim HM, Shin ES, Paik JW, Lee HW, Kang W, Kim A, Kim Y, Kim BC, Ham BJ, Bhak J, Lee S.	2019	Depression and suicide risk prediction models using blood-derived multi-omics data	n	y	n	n	n	n	n	n	n		10.1111/inm.12765
bi2018	Bi XA, Xu Q, Luo X, Sun Q, Wang Z.	2018	Weighted Random Support Vector Machine Clusters Analysis of Resting-State fMRI in Mild Cognitive Impairment	n	y	n	n	n	n	n	n	n		10.1007/s12144-019-0142-6
biddle2019	Biddle L, Miners A, Bozorgmehr K.	2019	Cost-utility of screening for depression among asylum seekers: a modelling study in Germany	n	y	n	n	n	n	n	n	n		10.3389/fpsyg.2015.00953
bil2013	Bil?«n K, Ponzer S, Ottosson C, Castr?«n M, Pettersson H.	2013	Deliberate self-harm patients in the emergency department: who will repeat and who will not? Validation and development of clinical decision rules	n	y	n	n	n	n	n	n	n		10.21659/rupkatha.v12n1.14
bird2018	Bird EL, Ige JO, Pilkington P, Pinto A, Petrokofsky C, Burgess-Allen J.	2018	Built and natural environment planning principles for promoting health: an umbrella review	n	n	y	n	n	n	n	n	n		x
bird2019	Bird, N.; McCarthy, G.; O'Sullivan, K.	2019	Exploring the Effectiveness of an Integrated Mixed Martial Arts and Psychotherapy Intervention for Young Men's Mental Health	n	y	n	n	n	n	n	n	n		10.1016/j.wem.2010.06.011
birdi2015	Birdi TJ, Shah SU.	2015	Implementing Perennial Kitchen Garden Model to Improve Diet Diversity in Melghat, India	y	n	n	n	n	n	n	n	n		10.1111/1475-6773.12818
birk2019	Birk MV, Mandryk RL.	2019	Improving the Efficacy of Cognitive Training for Digital Mental Health Interventions Through Avatar Customization: Crowdsourced Quasi-Experimental Study	n	y	n	n	n	n	n	n	n		10.1038/s41558-018-0123-z
birkett2011	Birkett LP, Newton-Fisher NE.	2011	How abnormal is the behaviour of captive, zoo-living chimpanzees?	n	y	n	n	n	y	n	n	n		10.1080/22423982.2019.1629783
bischoff2011	Bischoff P, Rundshagen I.	2011	Awareness under general anesthesia	y	y	n	n	n	n	n	n	n		10.1186/s13034-018-0219-2
bitta2020	Bitta MA, Kariuki SM, Omar A, Nasoro L, Njeri M, Kiambu C, Ongeri L, Newton CRJC.	2020	Contextualizing and pilot testing the Mental Health Gap Action Programme Intervention Guide (mhGAP-IG) to primary healthcare workers in Kilifi, Kenya	n	y	n	n	n	n	n	n	n		10.1192/bjpo.bp.115.002170
black2019	Black KJ, Munc A, Sinclair RR, Cheung JH.	2019	Stigma at work: The psychological costs and benefits of the pressure to work safely	n	y	n	n	n	n	n	n	n		10.1016/j.braindev.2012.11.003
blakeman2012	Blakeman P, Ford L.	2012	Working in the real world: a review of sociological concepts of health and well-being and their relation to modern mental health nursing	n	y	n	n	n	n	n	n	n		10.4103/0253-7176.155618
blouin2019	Blouin, Daniel; Pellerin, Stephanie; Poulin, Monique	2019	Increase in non-native species richness leads to biotic homogenization in vacant lots of a highly urbanized landscape	y	n	n	n	n	y	n	n	n		10.1177/1363461518786559
blum2017	Blum K, Febo M, Badgaiyan RD, Demetrovics Z, Simpatico T, Fahlke C, M OB, Li M, Dushaj K, Gold MS.	2017	Common Neurogenetic Diagnosis and Meso-Limbic Manipulation of Hypodopaminergic Function in Reward Deficiency Syndrome (RDS): Changing the Recovery Landscape	n	y	n	n	n	n	n	n	n		10.1016/j.healthplace.2019.03.003
bodrud2020	Bodrud-Doza M, Shammi M, Bahlman L, Islam ARMT, Rahman MM.	2020	Psychosocial and Socio-Economic Crisis in Bangladesh Due to COVID-19 Pandemic: A Perception-Based Assessment	n	y	n	n	n	n	n	n	y		10.1007/s10566-016-9360-3
bohnert2020	Bohnert AM, Loren DM, Miller AL.	2020	Examining childhood obesity through the lens of developmental psychopathology: Framing the issues to guide best practices in research and intervention	y	y	n	n	n	n	n	n	n		10.1177/070674371205700504
boormans2012	Boormans EM, Birnie E, Hoffer MJ, Macville MV, Galjaard RJ, Schuring-Blom GH, Bhola SL, Huijsdens K, Smits A, van Lith JM.	2012	Economic evaluation of multiplex ligation-dependent probe amplification and karyotyping in prenatal diagnosis: a cost-minimization analysis	n	y	n	n	n	n	n	n	n		10.21500/20112084.2103
bor2018	Bor J, Venkataramani AS, Williams DR, Tsai AC.	2018	Police killings and their spillover effects on the mental health of black Americans: a population-based, quasi-experimental study	n	y	n	n	n	n	n	n	n		10.1111/fcre.12474
boraii2017	Boraii S.	2017	A Descriptive Study to Assess Quality of Life in Egyptian Patients With a Stoma	n	n	n	n	y	n	n	n	n		10.1016/j.ijpsycho.2016.11.012
borgelt2012	Borgelt EL, Buchman DZ, Illes J.	2012	Neuroimaging in mental health care: voices in translation	n	y	n	n	n	n	n	n	n		10.1017/S0032247413000119
bos2011	Bos I, Jacobs L, Nawrot TS, de Geus B, Torfs R, Int Panis L, Degraeuwe B, Meeusen R.	2011	No exercise-induced increase in serum BDNF after cycling near a major traffic road	y	y	n	n	n	n	n	n	n		10.1016/j.biopsych.2020.02.015
bostic2019	Bostic JQ, Thomas CR, Beresin EV, Rostain AL, Kaye DL.	2019	Make a Joyful Noise: Integrating Music into Child Psychiatry Evaluation and Treatment	n	y	n	n	n	n	n	n	n		10.1289/ehp.1206273
boswell2016	Boswell JF, Constantino MJ, Kraus DR, Bugatti M, Oswald JM.	2016	The Expanding Relevance of Routinely Collected Outcome Data for Mental Health Care Decision Making	n	y	n	n	n	n	n	n	n		10.2196/mental.3935
boulanger2018	Boulanger-Bertolus J, Pancaro C, Mashour GA.	2018	Increasing Role of Maternal Immune Activation in Neurodevelopmental Disorders	n	y	n	n	n	n	n	n	n		10.1038/npp.2016.103
boulanger2019	Boulanger-Lapointe, Noemie; Gerin-Lajoie, Jose; Collier, Laura Siegwart; Desrosiers, Sarah; Spiech, Carmen; Henry, Gregory H. R.; Hermanutz, Luise; Levesque, Esther; Cuerrier, Alain	2019	Berry Plants and Berry Picking in Inuit Nunangat: Traditions in a Changing Socio-Ecological Landscape	y	y	n	n	n	n	n	n	n		10.1016/j.neuint.2019.104469
bowers2011	Bowers, Len; Dack, Charlotte; Gul, Noreen; Thomas, Ben; James, Karen	2011	Learning from prevented suicide in psychiatric inpatient care: An analysis of data from the National Patient Safety Agency	n	y	n	n	n	n	n	n	n		10.1016/j.socscimed.2012.12.002
boyle2016	Boyle T, Vallance JK, Ransom EK, Lynch BM.	2016	How sedentary and physically active are breast cancer survivors, and which population subgroups have higher or lower levels of these behaviors?	y	y	n	n	n	n	n	n	n		10.1080/13607863.2013.768212
bozorgmehr2016	Bozorgmehr K, Mohsenpour A, Saure D, Stock C, Loerbroks A, Joos S, Schneider C.	2016	[Systematic review and evidence mapping of empirical studies on health status and medical care among refugees and asylum seekers in Germany (1990-2014)]	n	y	y	n	n	n	n	n	n		10.1071/HC17071
brackbill2014	Brackbill RM, Caramanica K, Maliniak M, Stellman SD, Fairclough MA, Farfel MR, Turner L, Maslow CB, Moy AJ, Wu D, Yu S, Welch AE, Cone JE, Walker DJ.	2014	Nonfatal injuries 1 week after hurricane sandy--New York city metropolitan area, October 2012	y	n	n	n	n	n	n	n	n		10.1192/s2056474000000222
bradbery2011	Bradbery, Patrick	2011	Plumbing the Depths: Research as a Developmental Tool	y	y	n	n	n	n	n	n	n		10.1016/j.ecoser.2018.09.003
bradford2014	Bradford DE, Kaye JT, Curtin JJ.	2014	Not just noise: individual differences in general startle reactivity predict startle response to uncertain and certain threat	n	y	n	n	n	n	n	n	n		10.1071/NB10030
bradley2012	Bradley RT, Galvin P, Atkinson M, Tomasino D.	2012	Efficacy of an Emotion Self-regulation Program for Promoting Development in Preschool Children	n	y	n	n	n	n	n	n	n		10.3390/su8101040
braga2019	Braga-Pinto, Cesar	2019	THE PLEASURES OF IMITATION: GABRIEL TARDE, OSCAR WILDE, AND JOAO DO RIO IN BRAZIL'S LONG FIN DE SIECLE	y	y	n	n	n	n	n	n	n		10.3390/su10051508
bransby2019	Bransby L, Lim YY, Ames D, Fowler C, Roberston J, Harrington K, Snyder PJ, Villemagne VL, Salvado O, Masters CL, Maruff P for the AIBL Research Group.	2019	Sensitivity of a Preclinical Alzheimer's Cognitive Composite (PACC) to amyloid ?? load in preclinical Alzheimer's disease	n	y	n	n	n	n	n	n	n		10.1016/j.mehy.2017.05.003
brass2019	Brass M, Furstenberg A, Mele AR.	2019	Why neuroscience does not disprove free will	n	y	n	n	n	n	n	n	n		10.4161/dish.23076
brayton2017	Brayton, Sean	2017	The "madness" of market logic: mental illness and late capitalism in The Double and Nightcrawler	n	y	n	n	n	n	n	n	n		10.1186/1476-069X-13-42
brennan2018	Brennan, A.; Dempsey, M.	2018	THE STUDENT VOICE: THE STUDENTS OWN VIEWS ON SMARTPHONE USAGE AND IMPACT ON THEIR ACADEMIC PERFORMANCE	n	y	n	n	n	n	n	n	n		10.1007/s40501-018-0154-0
brewster2014	Brewster L.	2014	The public library as therapeutic landscape: a qualitative case study	n	y	n	n	n	n	n	n	n		10.2196/mental.5843
brickell2018	Brickell CM.	2018	Diagnosis and Treatment of Borderline Personality Disorder in the College Mental Health Setting	n	y	n	n	n	n	n	n	n		10.2196/mhealth.7297
brooks2020	Brooks JL, Asafu-Adjei J, Currin EG, Beeber LS.	2020	Exploring a broader context of the home environment and its relationship with asthma control in American?ßIndian children	y	n	n	n	n	n	n	n	n		10.2196/mhealth.5960
brown2015	Brown B, Rutherford P, Crawford P.	2015	The role of noise in clinical environments with particular reference to mental health care: A narrative review	n	n	y	n	n	n	n	n	n		10.1145/3038912.3052618
brown2016	Brown J, Fawzi W, Shah A, Joyce M, Holt G, McCarthy C, Stevenson C, Marange R, Shakes J, Solomon-Ayeh K.	2016	Low stimulus environments: reducing noise levels in continuing care	n	y	n	n	n	n	n	n	n		10.1371/journal.pone.0105169
brown2019	Brown FL, Mishra T, Frounfelker RL, Bhargava E, Gautam B, Prasai A, Betancourt TS.	2019	'Hiding their troubles': a qualitative exploration of suicide in Bhutanese refugees in the USA	n	y	n	n	n	n	n	n	n		10.3390/ijerph17144988
brown2020	Brown A, Barker ED, Rahman Q.	2020	A Systematic Scoping Review of the Prevalence, Etiological, Psychological, and Interpersonal Factors Associated with BDSM	n	y	y	n	n	n	n	n	n		10.1007/s40273-016-0455-3
brucoli2019	Brucoli M, Baena RRY, Boffano P, Benech A.	2019	Psychological profiles in patients undergoing orthognathic surgery or rhinoplasty: a preoperative and preliminary comparison	n	y	n	n	n	n	n	n	n		10.1016/j.physa.2016.11.139
brunton2017	Brunton, J. A.; Mackintosh, C. I.	2017	Interpreting university sport policy in England: seeking a purpose in turbulent times?	n	y	n	n	n	n	n	n	n		10.1016/j.infbeh.2017.10.005
buckingham2013	Buckingham, Christopher D.; Ahmed, Abu; Adams, Ann	2013	Designing multiple user perspectives and functionality for clinical decision support systems	n	y	n	n	n	n	n	n	n		10.1016/j.pnpbp.2018.03.018
bugaj2011	Bugaj, Katarzyna; Brenner, Brenda	2011	The Effects of Music Instruction on Cognitive Development and Reading Skills-An Overview	n	y	n	n	n	n	n	n	n		10.1186/s13065-016-0189-5
burger2020	Burger F, Neerincx MA, Brinkman WP.	2020	Technological State of the Art of Electronic Mental Health Interventions for Major Depressive Disorder: Systematic Literature Review	n	n	y	n	n	n	n	n	n		10.1007/s11869-020-00843-5
burkhouse2019	Burkhouse KL, Owens M, James K, Gibb BE.	2019	Age differences in electrocortical reactivity to fearful faces following aversive conditioning in youth	n	y	n	n	n	n	n	n	n		10.3389/fendo.2020.00300
burnight2018	Burnight ER, Bohrer LR, Giacalone JC, Klaahsen DL, Daggett HT, East JS, Madumba RA, Worthington KS, Mullins RF, Stone EM, Tucker BA, Wiley LA.	2018	CRISPR-Cas9-Mediated Correction of the 1.02ÈÃÙkb Common Deletion in CLN3 in Induced Pluripotent Stem Cells from Patients with Batten Disease	n	y	n	n	n	n	n	n	n		10.1017/S0007114516004177
butters2020	Butters, Robert P.; Droubay, Brian A.; Seawright, Jessica L.; Tollefson, Derrik R.; Lundahl, Brad; Whitaker, Lauren	2020	Intimate Partner Violence Perpetrator Treatment: Tailoring Interventions to Individual Needs	n	y	n	n	n	n	n	n	n		10.1037/a0032823
byeon2017	Byeon, Haewon	2017	Chi-Square Automatic Interaction Detection Modeling for Predicting Depression in Multicultural Female Students	n	y	n	n	n	n	n	n	n		10.1109/ICASSP.2016.7472099
byeon2019	Byeon, Haewon	2019	Development of Depression Prediction Models for Caregivers of Patients with Dementia Using Decision Tree Learning Algorithm	n	y	n	n	n	n	n	n	n		10.1515/ijamh.2012.003
caine2014	Caine, Joanne M.; Churches, Quentin; Waddington, Lynne; Nigro, Julie; Breheney, Kerry; Masters, Colin L.; Nuttall, Stewart D.; Streltsov, Victor A.	2014	Design of non-aggregating variants of A beta peptide	y	y	n	n	n	n	n	n	n		10.2147/MDER.S141599
cairney2014	Cairney J, Veldhuizen S, Vigod S, Streiner DL, Wade TJ, Kurdyak P.	2014	Exploring the social determinants of mental health service use using intersectionality theory and CART analysis	n	y	n	n	n	n	n	n	n		10.1080/01612840.2016.1189634
callahan2018	Callahan ML, Lim MM.	2018	Sensory Sensitivity in TBI: Implications for Chronic Disability	y	y	n	n	n	n	n	n	n		10.1016/S0140-6736(19)30427-1
callard2015	Callard F, Fitzgerald D, Woods A.	2015	Interdisciplinary collaboration in action: tracking the signal, tracing the noise	y	y	n	n	n	n	n	n	n		10.1016/j.infbeh.2016.11.008
callwood2018	Callwood A, Bolger S, Allan HT.	2018	The 'values journey' of nursing and midwifery students selected using multiple mini interviews; Year One findings	n	y	n	n	n	n	n	n	n		10.1177/1078390320907693
callwood2019	Callwood A, Groothuizen JE, Allan HT.	2019	The "values journey" of nursing and midwifery students selected using multiple mini interviews; year two findings	n	y	n	n	n	n	n	n	n		10.3390/ijerph120707974
camilleri2017	Camilleri I, Ward M, Scerri J.	2017	Existing But Not Living: Experiences of Long-Term Caregivers of Individuals With Unipolar Depression	n	y	n	n	n	n	n	n	n		10.1016/bs.pbr.2014.11.010
campbell2013	Campbell J, Sharma A.	2013	Compensatory changes in cortical resource allocation in adults with hearing loss	n	y	n	n	n	n	n	n	n		10.3389/fnagi.2017.00013
campos2013	Campos-Serna J, Ronda-P?«rez E, Artazcoz L, Moen BE, Benavides FG.	2013	Gender inequalities in occupational health related to the unequal distribution of working and employment conditions: a systematic review	n	n	y	n	n	n	n	n	n		10.1007/s10916-015-0374-4
canel2020	Canel??n SP, Boland MR.	2020	A Systematic Literature Review of Factors Affecting the Timing of Menarche: The Potential for Climate Change to Impact Women's Health	n	n	y	n	n	n	n	n	n		x
cantor2019	Cantor MC, Neave HW, Costa JHC.	2019	Current perspectives on the short- and long-term effects of conventional dairy calf raising systems: a comparison with the natural environment	y	n	n	n	n	y	n	n	n		10.1016/j.cbpra.2016.10.002
cardoso2017	Cardoso G, Xavier M, Vilagut G, Petukhova M, Alonso J, Kessler RC, Caldas-de-Almeida JM.	2017	Days out of role due to common physical and mental conditions in Portugal: results from the WHO World Mental Health Survey	n	y	n	n	n	n	n	n	n		10.3758/s13421-018-0821-9
cariaga2017	Cariaga-Martinez A, Alel??-Paz R.	2017	Rethinking the Epigenetic Framework to Unravel the Molecular Pathology of Schizophrenia	n	y	n	n	n	n	n	n	n		10.1016/j.envres.2018.06.004
carlier2016	Carlier, M.; Mainguet, B.; Delevoye-Turrell, Y.	2016	Cognitive exercise through body movement: Using a fun and short neuropsychological tool to adapt physical activity and enhance pleasure in individuals suffering from mental illnesses	n	y	n	n	n	n	n	n	n		10.1163/22134808-20191426
carmel2018	Carmel S, Tovel H, Raveis VH, O'Rourke N.	2018	Is a Decline in Will to Live a Consequence or Predictor of Depression in Late Life?	n	y	n	n	n	n	n	n	n		10.1515/jpm-2015-0074
carpenter2019	Carpenter-Song, Elizabeth	2019	The Kids Were My Drive: Shattered Families, Moral Striving, and the Loss of Parental Selves in the Wake of Homelessness	n	y	n	n	n	n	n	n	n		10.1093/hmg/ddv171
carr2019	Carr S, Pichora-Fuller MK, Li KZH, Phillips N, Campos JL.	2019	Multisensory, Multi-Tasking Performance of Older Adults With and Without Subjective Cognitive Decline	n	y	n	n	n	n	n	n	n		10.4103/0253-7176.135380
carson2018	Carson NJ, Gansner M, Khang J.	2018	Assessment of Digital Media Use in the Adolescent Psychiatric Evaluation	n	y	n	n	n	n	n	n	n		10.1016/j.jenvp.2012.01.005
casati2015	Casati L, Sendra R, Sibilia V, Celotti F.	2015	Endocrine disrupters: the new players able to affect the epigenome	n	y	n	n	n	n	n	n	n		10.1145/3267305.3277820
caspani2019	Caspani G, Kennedy S, Foster JA, Swann J.	2019	Gut microbial metabolites in depression: understanding the biochemical mechanisms	n	y	n	n	n	n	n	n	n		10.1145/3267305.3267605
cassano2012	Cassano GB, Rucci P, Benvenuti A, Miniati M, Calugi S, Maggi L, Pini S, Kupfer DJ, Maj M, Fagiolini A, Frank E.	2012	The role of psychomotor activation in discriminating unipolar from bipolar disorders: a classification-tree analysis	n	y	n	n	n	n	n	n	n		10.1002/ana.24929
castiglione2019	Castiglione A, Casa M, Gallo S, Sorrentino F, Dhima S, Cilia D, Lovo E, Gambin M, Previato M, Colombo S, Caserta E, Gheller F, Giacomelli C, Montino S, Limongi F, Brotto D, Gabelli C, Trevisi P, Bovo R, Martini A.	2019	Correspondence Between Cognitive and Audiological Evaluations Among the Elderly: A Preliminary Report of an Audiological Screening Model of Subjects at Risk of Cognitive Decline With Slight to Moderate Hearing Loss	n	y	n	n	n	n	n	n	n		10.1016/j.envres.2019.05.009
castro2015	Castro EM, Santiago LE, Jim?«nez JC, D?Ývila-Vargas D, Rosal MC.	2015	A Social-Ecological View of Barriers and Facilitators for HIV Treatment Adherence: Interviews with Puerto Rican HIV Patients	y	y	n	n	n	n	n	n	n		10.4103/0019-5545.91906
chambers2017	Chambers SK, Chung E, Wittert G, Hyde MK.	2017	Erectile dysfunction, masculinity, and psychosocial outcomes: a review of the experiences of men after prostate cancer treatment	n	y	y	n	n	n	n	n	n		10.1016/j.aip.2013.10.006
chambers2018	Chambers GM, Randall S, Mihalopoulos C, Reilly N, Sullivan EA, Highet N, Morgan VA, Croft ML, Chatterton ML, Austin MP.	2018	Mental health consultations in the perinatal period: a cost-analysis of Medicare services provided to women during a period of intense mental health reform in Australia	n	y	n	n	n	n	n	n	n		10.1016/j.socscimed.2018.09.024
chan2014	Chan AW, Xu Y, Jiang J, Rahim T, Zhao D, Kocerha J, Chi T, Moran S, Engelhardt H, Larkin K, Neumann A, Cheng H, Li C, Nelson K, Banta H, Zola SM, Villinger F, Yang J, Testa CM, Mao H, Zhang X, Bachevalier J.	2014	A two years longitudinal study of a transgenic Huntington disease monkey	n	n	n	n	n	y	n	n	n		10.1016/j.jad.2012.07.037
chan2016	Chan EJ, McNiel DE, Binder RL.	2016	Sex Offenders in the Digital Age	n	y	n	n	n	n	n	n	n		x
chang2016	Chang, Zhuoqing; Qiu, Qiang; Sapiro, Guillermo	2016	Synthesis-Based Low-Cost Gaze Analysis	y	y	n	n	n	n	n	n	n		10.1016/j.aimed.2015.03.002
chaovalitwongse2017	Chaovalitwongse WA, Won D, Seref O, Borghesani P, Askren MK, Willis S, Grabowski TJ.	2017	Network Optimization of Functional Connectivity Within Default Mode Network Regions to Detect Cognitive Decline	n	y	n	n	n	n	n	n	n		10.1016/S2542-5196(18)30033-0
chappell2015	Chappell J, Phillips AC, van Noordwijk MA, Mitra Setia T, Thorpe SK.	2015	The Ontogeny of Gap Crossing Behaviour in Bornean Orangutans (Pongo pygmaeus wurmbii)	y	y	n	n	n	y	n	n	n		10.1186/s40101-014-0040-4
chaturvedi2017	Chaturvedi M, Hatz F, Gschwandtner U, Bogaarts JG, Meyer A, Fuhr P, Roth V.	2017	Quantitative EEG (QEEG) Measures Differentiate Parkinson's Disease (PD) Patients from Healthy Controls (HC)	n	y	n	n	n	n	n	n	n		10.1016/j.landurbplan.2019.103638
chen2011	Chen, Keng; Mi, Ya-Jing; Ma, Yue; Fu, Hua-Lin; Jin, Wei-Lin	2011	The Mental Retardation Associated Protein, srGAP3 Negatively Regulates VPA-Induced Neuronal Differentiation of Neuro2A Cells	n	y	n	n	n	n	n	n	n		10.1016/j.schres.2019.10.012
chen2016	Chen FP, Samet S, Gorroochurn P, O'Hara KM.	2016	Characterizing Factors of Employment Status in Persons With Major Depressive Disorder	n	y	n	n	n	n	n	n	n		10.1126/sciadv.aax0903
chen2019	Chen, Guangwu; Zhu, Yuhan; Wiedmann, Thomas; Yao, Lina; Xu, Lixiao; Wang, Yafei	2019	Urban-rural disparities of household energy requirements and influence factors in China: Classification tree models	y	y	n	n	n	n	n	n	n		10.1016/j.envres.2017.06.030
chen2020b	Chen QY, Xu N, Huang ST, Lin ZW, Cao H, Chen LW, Chen Q.	2020	Effect of continuous nursing interventions on valve noise-related anxiety and quality of life in patients who underwent mechanical mitral valve replacement	y	n	n	n	n	n	n	n	n		10.1016/j.healthplace.2020.102296
cheng2013	Cheng JJ, Berry P.	2013	Health co-benefits and risks of public health adaptation strategies to climate change: a review of current literature	n	n	y	n	n	n	n	n	n		10.1073/pnas.1510459112
cheng2015	Cheng, Dongmei; Li, Tan; Niu, Lihua	2015	A Study on the Application of the Decision Tree Algorithm in Psychological Information of Vocational College Students	n	y	n	n	n	n	n	n	n		10.1080/09669582.2020.1742725
cheng2016	Cheng PG, Ramos RM, Bitsch J?³, Jonas SM, Ix T, See PL, Wehrle K.	2016	Psychologist in a Pocket: Lexicon Development and Content Validation of a Mobile-Based App for Depression Screening	n	y	n	n	n	n	n	n	n		10.3390/healthcare5030046
cheng2018a	Cheng, Xinxuan; Fan, Longfei; Wang, Jiachen	2018	Can Energy Structure Optimization, Industrial Structure Changes, Technological Improvements, and Central and Local Governance Effectively Reduce Atmospheric Pollution in the Beijing-Tianjin-Hebei Area in China?	y	n	n	n	n	n	n	n	n		10.3389/fped.2018.00339
chester2016	Chester, Polly; Ehrlich, Carolyn; Warburton, Loretta; Baker, David; Kendall, Elizabeth; Crompton, David	2016	What is the work of Recovery Oriented Practice? A systematic literature review	n	n	y	n	n	n	n	n	n		10.1007/s00420-020-01547-0
chi2020	Chi P, Gutberg J, Berta W.	2020	The Conceptualization of the Natural Environment in Healthcare Facilities: A Scoping Review	n	n	y	n	n	n	n	n	n		10.1007/s10597-015-9938-5
chiauzzi2019	Chiauzzi, Emil; Torous, John; Nguyen, Theresa; Rethorst, Chad D.	2019	DIGITAL HEALTH IN THE WILD: HOW DO WE HELP PEOPLE WITH MENTAL HEALTH DISORDERS UTILIZE TECHNOLOGY IN THEIR TREATMENT?	n	y	n	n	n	n	n	n	n		10.3390/ijerph16010086
chihuri2019	Chihuri S, Li G.	2019	State marijuana laws and opioid overdose mortality	n	y	n	n	n	n	n	n	n		10.4103/nah.NAH_9_18
chin2014	Chin JL, Yee BW, Banks ME.	2014	Women's health and behavioral health issues in health care reform	n	y	n	n	n	n	n	n	n		10.3390/ijerph14010076
chin2019	Chin WY, Wan EYF, Dowrick C, Arroll B, Lam CLK.	2019	Tree analysis modeling of the associations between PHQ-9 depressive symptoms and doctor diagnosis of depression in primary care	n	y	n	n	n	n	n	n	n		10.1007/s11356-014-3818-3
cho2019	Cho Y, Julier SJ, Bianchi-Berthouze N.	2019	Instant Stress: Detection of Perceived Mental Stress Through Smartphone Photoplethysmography and Thermal Imaging	n	y	n	n	n	n	n	n	n		10.1038/srep11610
cho2019a	Cho G, Yim J, Choi Y, Ko J, Lee SH.	2019	Review of Machine Learning Algorithms for Diagnosing Mental Illness	n	y	n	n	n	n	n	n	n		10.1007/s10826-013-9731-4
chong2015	Chong JX, McMillin MJ, Shively KM, Beck AE, Marvin CT, Armenteros JR, Buckingham KJ, Nkinsi NT, Boyle EA, Berry MN, Bocian M, Foulds N, Uzielli ML, Haldeman-Englert C, Hennekam RC, Kaplan P, Kline AD, Mercer CL, Nowaczyk MJ, Klein Wassink-Ruiter JS, McPherson EW, Moreno RA, Scheuerle AE, Shashi V, Stevens CA, Carey JC, Monteil A, Lory P, Tabor HK, Smith JD, Shendure J, Nickerson DA; University of…	2015	De novo mutations in NALCN cause a syndrome characterized by congenital contractures of the limbs and face, hypotonia, and developmental delay	n	y	n	n	n	n	n	n	n		10.1007/s11524-011-9621-2
chou2017	Chou, Tommy; Bry, Laura J.; Corner, Jonathan S.	2017	Multimedia Field Test: Evaluating the Creative Ambitions of SuperBetter and Its Quest to Gamify Mental Health	n	y	n	n	n	n	n	n	n		10.1093/eurpub/cky091
christy2012	Christy, Annette; Clark, Colleen; Frei, Autumn; Rynearson-Moody, Sarah	2012	CHALLENGES OF DIVERTING VETERANS TO TRAUMA INFORMED CARE The Heterogeneity of Intercept 2	n	y	n	n	n	n	n	n	n		10.1186/s12889-019-7893-8
chua2020	Chua JL.	2020	Medication by Proxy: The Devolution of Psychiatric Power and Shared Accountability to Psychopharmaceutical Use Among Soldiers in America's Post-9/11 Wars	n	y	n	n	n	n	n	n	n		10.1016/j.envint.2019.105016
chua2020a	Chua A Jr, Mendoza MJ, Ando M, Planilla CJ, Fernando G, Strebel HMJ, Ignacio J.	2020	Changing the Landscape of Medical Oncology Training at the National University Hospital in the Philippines during the Coronavirus Disease 2019 (COVID-19) Pandemic	n	n	n	n	n	n	n	n	y		10.1192/bjp.2019.100
cianconi2020	Cianconi P, Betr?? S, Janiri L.	2020	The Impact of Climate Change on Mental Health: A Systematic Descriptive Review	n	n	y	n	n	n	n	n	n		10.1016/j.landurbplan.2019.103602
cigarini2018	Cigarini A, Vicens J, Duch J, S?Ýnchez A, Perell?? J.	2018	Quantitative account of social interactions in a mental health care ecosystem: cooperation, trust and collective action	n	y	n	n	n	n	n	n	n		10.1016/j.healthplace.2019.102167
cigarini2018a	Cigarini A, Vicens J, Duch J, S?Ýnchez A, Perell?? J.	2018	Author Correction: Quantitative account of social interactions in a mental health care ecosystem: cooperation, trust and collective action	n	y	n	n	n	n	n	n	n		10.1109/TNSRE.2017.2679056
claes2016	Claes AJ, Mertens G, Gilles A, Hofkens-Van den Brandt A, Fransen E, Van Rompaey V, Van de Heyning P.	2016	The Repeatable Battery for the Assessment of Neuropsychological Status for Hearing Impaired Individuals (RBANS-H) before and after Cochlear Implantation: A Protocol for a Prospective, Longitudinal Cohort Study	y	y	n	n	n	n	n	n	n		x
claes2018	Claes, Annes J.; Van de Heyning, Paul; Gilles, Annick; Van Rompaey, Vincent; Mertens, Griet	2018	Cognitive Performance of Severely Hearing-impaired Older Adults Before and After Cochlear Implantation: Preliminary Results of a Prospective, Longitudinal Cohort Study Using the RBANS-H	y	y	n	n	n	n	n	n	n		10.3389/fnins.2019.01232
clark2017	Clark C, Wellner B, Davis R, Aberdeen J, Hirschman L.	2017	Automatic classification of RDoC positive valence severity with a neural network	y	y	n	n	n	n	n	n	n		10.2478/v10102-010-0012-4
clark2018	Clark C, Paunovic K.	2018	WHO Environmental Noise Guidelines for the European Region: A Systematic Review on Environmental Noise and Quality of Life, Wellbeing and Mental Health	n	n	y	n	n	n	n	n	n		10.1136/bmjopen-2018-023914
clark2020	Clark C, Crumpler C, Notley AH.	2020	Evidence for Environmental Noise Effects on Health for the United Kingdom Policy Context: A Systematic Review of the Effects of Environmental Noise on Mental Health, Wellbeing, Quality of Life, Cancer, Dementia, Birth, Reproductive Outcomes, and Cognition	n	n	y	n	n	n	n	n	n		10.1289/EHP209
clauss2014	Clauss-Ehlers, Caroline S.; Parham, William D.	2014	Landscape of Diversity in Higher Education: Linking Demographic Shifts to Contemporary University and College Counseling Center Practices	y	y	n	n	n	n	n	n	n		10.1016/j.yhbeh.2017.03.004
cleverley2011	Cleverley K, Kidd SA.	2011	Resilience and suicidality among homeless youth	n	y	n	n	n	n	n	n	n		10.3389/fnhum.2012.00293
clifford2016	Clifford A, Lang L, Chen R, Anstey KJ, Seaton A.	2016	Exposure to air pollution and cognitive functioning across the life course--A systematic literature review	n	n	y	n	n	n	n	n	n		10.1007/s40726-016-0039-z
cogliati2020	Cogliati S, Clementi V, Francisco M, Crespo C, Arga??araz F, Grau R.	2020	Bacillus Subtilis Delays Neurodegeneration and Behavioral Impairment in the Alzheimer's Disease Model Caenorhabditis Elegans	n	y	n	n	n	y	n	n	n		10.1159/000449485
colagrosso2019	Colagrosso EMG, Fournier P, Fitzpatrick EM, H?«bert S.	2019	A Qualitative Study on Factors Modulating Tinnitus Experience	y	n	n	n	n	n	n	n	n		10.3389/fnsys.2020.00041
cole2016	Cole, Andrea; Kim, HyunSoo; Lotz, Kevin; Munson, Michelle R.	2016	Exploring the perceptions of workers on young adult mental health service (dis)engagement	n	y	n	n	n	n	n	n	n		10.1136/bmj.i3812
coleman2019	Coleman SRM, Gaalema DE, Nighbor TD, Kurti AA, Bunn JY, Higgins ST.	2019	Current cigarette smoking among U.S. college graduates	y	y	n	n	n	n	n	n	n		10.1002/da.22789
colicino2014	Colicino, Elena; Power, Melinda C.; Cox, David G.; Weisskopf, Marc G.; Hou, Lifang; Alexeeff, Stacy E.; Sanchez-Guerra, Marco; Vokonas, Pantel; Spiro, Avron, III; Schwartz, Joel; Baccarelli, Andrea A.	2014	Mitochondrial haplogroups modify the effect of black carbon on age-related cognitive impairment	n	y	n	n	n	n	n	n	n		10.1017/S1049023X17006574
collier2018	Collier S, Monette P, Hobbs K, Tabasky E, Forester BP, Vahia IV.	2018	Mapping Movement: Applying Motion Measurement Technologies to the Psychiatric Care of Older Adults	n	y	n	n	n	n	n	n	n		10.1016/j.neulet.2011.06.019
collins2020	Collins, Lauren W.; Landrum, Timothy J.; Sweigart, Chris A.	2020	Extreme School Violence and Students with Emotional and Behavioral Disorders: (How) Do They Intersect?	n	y	n	n	n	n	n	n	n		10.1177/0706743716632523
collins2020a	Collins, Rebecca M.; Spake, Rebecca; Brown, Kerry A.; Ogutu, Booker O.; Smith, Dianna; Eigenbrod, Felix	2020	A systematic map of research exploring the effect of greenspace on mental health	n	n	y	n	n	n	n	n	n		10.1016/j.envint.2010.03.007
collom2019	Collom J, Patterson E, Lawrence-Smith G, Tracy DK.	2019	The unheard voice: a qualitative exploration of companions' experiences of liaison psychiatry and mental health crises in the emergency department	n	y	n	n	n	n	n	n	n		10.11604/pamj.2017.28.1.13554
conviser2014	Conviser JH, Fisher SD, Mitchell KB.	2014	Oral care behavior after purging in a sample of women with bulimia nervosa	n	y	n	n	n	n	n	n	n		10.4103/1463-1741.112361
conway2020	Conway, Christopher C.; Simms, Leonard J.	2020	Maximizing the applied value of structural models of psychopathology: Introduction to a special issue of Personality and Mental Health	n	y	n	n	n	n	n	n	n		x
cook2013	Cook JA, Mueser KT.	2013	The challenge of obesity	y	y	n	n	n	n	n	n	n		10.1371/journal.pone.0155357
cooley2020	Cooley SJ, Jones CR, Kurtz A, Robertson N.	2020	'Into the Wild': A meta-synthesis of talking therapy in natural outdoor spaces	n	n	y	n	n	n	n	n	n		10.1093/eurpub/ckaa015
coppola2019	Coppola, Maria Micaela	2019	The Quest for Insight and Empathy in Alice Munro's Stories of Dementia	y	y	n	n	n	n	n	n	n		x
cornips2020	Cornips E, Grouls M, Bekelaar K.	2020	Transdural Thoracic Disk Herniation with Longitudinal Slitlike Dural Defect Causing Intracranial Hypotension: Report of 2 Cases	y	y	n	n	n	n	n	n	n		x
cory2013	Cory, Julie	2013	Identification and management of cognitive decline in companion animals and the comparisons with Alzheimer disease: A review	y	y	n	n	n	y	n	n	n		10.4103/1463-1741.127855
costa2019	Costa E Silva JA, Steffen RE.	2019	Urban environment and psychiatric disorders: a review of the neuroscience and biology	n	n	y	n	n	n	n	n	n		10.1016/j.scitotenv.2015.03.053
couvy2017	Couvy-Duchesne B, Davenport TA, Martin NG, Wright MJ, Hickie IB.	2017	Validation and psychometric properties of the Somatic and Psychological HEalth REport (SPHERE) in a young Australian-based population sample using non-parametric item response theory	n	y	n	n	n	n	n	n	n		10.1186/s12889-017-4244-5
cowan2020	Cowan CSM, Dinan TG, Cryan JF.	2020	Annual Research Review: Critical windows - the microbiota-gut-brain axis in neurocognitive development	n	y	n	n	n	n	n	n	n		10.3389/fpubh.2019.00133
cowell2017	Cowell AJ, Dowd WN, Mills MJ, Hinde JM, Bray JW.	2017	Sustaining SBIRT in the wild: simulating revenues and costs for Screening, Brief Intervention and Referral to Treatment programs	n	y	n	n	n	n	n	n	n		x
craciun2017	Craciun, Mariana	2017	Time, Knowledge, and Power in Psychotherapy: A Comparison of Psychodynamic and Cognitive Behavioral Practices	n	y	n	n	n	n	n	n	n		10.3402/gha.v3i0.5640
creese2018	Creese B, Da Silva MV, Johar I, Ballard C.	2018	The modern role of antipsychotics for the treatment of agitation and psychosis in Alzheimer's disease	n	y	n	n	n	n	n	n	n		10.1016/j.childyouth.2010.11.006
crnek2017	Crnek-Georgeson KT, Wilson LA, Page A.	2017	Factors influencing suicide in older rural males: a review of Australian studies	n	n	y	n	n	n	n	n	n		10.18666/TRJ-2016-V50-I2-6788
cromwell2018	Cromwell HC.	2018	Jaak Panksepp (1943-2017)	y	y	n	n	n	n	n	n	n		10.1016/j.amp.2013.04.010
crook2020	Crook S.	2020	'A disastrous blow': psychiatric risk, social indicators and medical authority in abortion reform in post-war Britain	n	y	n	n	n	n	n	n	n		10.1111/psyp.12193
cross2020	Cross JH, Cock H.	2020	A perspective on cannabinoids for treating epilepsy: Do they really change the landscape?	n	y	n	n	n	n	n	n	n		10.3390/su9040575
crossen2020	Crossen S, Xing G, Hoch JS.	2020	Changing costs of type 1 diabetes care among US children and adolescents	y	n	n	n	n	n	n	n	n		10.1177/1039856217726695
cuellar2014	Cuellar AE, Cheema J.	2014	Health care reform, behavioral health, and the criminal justice population	n	y	n	n	n	n	n	n	n		10.1017/S0033291718000612
cui2011	Cui Z, Faries DE, Zhao Y, Novick D, Liu X.	2011	Trajectory analysis of healthcare costs for patients with major depressive disorder treated with high doses of duloxetine	n	y	n	n	n	n	n	n	n		10.1097/CNJ.0000000000000257
cui2018	Cui L, Wang S, Yang X, Gao L, Zheng M, Wang R, Qiao L, Xu C.	2018	Fatty acids, polychlorinated dibenzo-p-dioxins and dibenzofurans, and dioxin-like polychlorinated biphenyls in paired muscle and skin from fish from the Bohai coast, China: Benefits and risks associated with fish consumption	n	y	n	n	n	n	n	n	n		10.1111/joim.12878
cui2019	Cui, Can; Wang, Zhen; He, Pan; Yuan, Shanfeng; Niu, Beibei; Kang, Ping; Kang, Chaogui	2019	Escaping from pollution: the effect of air quality on inter-city population mobility in China	y	n	n	n	n	n	n	n	n		10.1186/1880-6805-33-22
cui2020	Cui L, Wang C, Wu Z, Peng D, Huang J, Zhang C, Huang J, Hong W, Wang Y, Chen J, Liu T, Rong H, Yang H, Fang Y.	2020	Symptomatology differences of major depression in psychiatric versus general hospitals: A machine learning approach	n	y	n	n	n	n	n	n	n		10.7748/nr2011.04.18.3.6.c8457
culph2015	Culph JS, Wilson NJ, Cordier R, Stancliffe RJ.	2015	Men's Sheds and the experience of depression in older Australian men	n	y	n	n	n	n	n	n	n		10.3390/ijerph17103427
cummings2018	Cummings J, Reiber C, Kumar P.	2018	The price of progress: Funding and financing Alzheimer's disease drug development	n	y	n	n	n	n	n	n	n		10.3390/ijerph16050876
curtis2013	Curtis, Sarah; Gesler, Wilbert; Wood, Victoria; Spencer, Ian; Mason, James; Close, Helen; Reilly, Joseph	2013	Compassionate containment? Balancing technical safety and therapy in the design of psychiatric wards	n	y	n	n	n	n	n	n	n		10.1111/mila.12172
daghagh2019	Daghagh Yazd S, Wheeler SA, Zuo A.	2019	Key Risk Factors Affecting Farmers' Mental Health: A Systematic Review	n	n	y	n	n	n	n	n	n		10.2147/CIA.S39921
dagher2015	Dagher RK, Green KM.	2015	Does depression and substance abuse co-morbidity affect socioeconomic status? Evidence from a prospective study of urban African Americans	n	y	n	n	n	n	n	n	n		10.1016/j.landurbplan.2013.03.001
damiano2015	Damiano JA, Afawi Z, Bahlo M, Mauermann M, Misk A, Arsov T, Oliver KL, Dahl HH, Shearer AE, Smith RJ, Hall NE, Mahmood K, Leventer RJ, Scheffer IE, Muona M, Lehesjoki AE, Korczyn AD, Herrmann H, Berkovic SF, Hildebrand MS.	2015	Mutation of the nuclear lamin gene LMNB2 in progressive myoclonus epilepsy with early ataxia	y	y	n	n	n	n	n	n	n		x
dang2015	Dang X, Eliceiri BP, Baird A, Costantini TW.	2015	CHRFAM7A: a human-specific ??7-nicotinic acetylcholine receptor gene shows differential responsiveness of human intestinal epithelial cells to LPS	y	y	n	n	n	n	n	n	n		10.1088/1755-1315/64/1/012039
dangarembizi2012	Dangarembizi R, Erlwanger KH, Moyo D, Chivandi E.	2012	Phytochemistry, pharmacology and ethnomedicinal uses of Ficus thonningii (Blume Moraceae): a review	n	y	y	n	n	n	n	n	n		10.1093/occmed/kqv088
danhoundo2017	Danhoundo, Georges; Khanlou, Nazilla	2017	Family Ties and Mental Health of Orphans in Ouagadougou (Burkina Faso). Does the Gender of the Dead Parent Matter?	n	y	n	n	n	n	n	n	n		10.1371/journal.pone.0105321
daniau2013	Daniau C, Dor F, Eilstein D, Lefranc A, Empereur-Bissonnet P, Dab W.	2013	[Study of self-reported health of people living near point sources of environmental pollution: a review. Second part: analysis of results and perspectives]	n	n	y	n	n	n	n	n	n		10.1590/1982-0194201400088
dankiw2020	Dankiw KA, Tsiros MD, Baldock KL, Kumar S.	2020	The impacts of unstructured nature play on health in early childhood development: A systematic review	n	n	y	n	n	n	n	n	n		x
darnell2017	Darnell D, Dorsey CN, Melvin A, Chi J, Lyon AR, Lewis CC.	2017	A content analysis of dissemination and implementation science resource initiatives: what types of resources do they offer to advance the field?	n	n	y	n	n	n	n	n	n		10.3390/ijerph17124563
das2017	Das P, Chacko AR, Belfort G.	2017	Alzheimer's Protective Cross-Interaction between Wild-Type and A2T Variants Alters A??(42) Dimer Structure	n	y	n	n	n	n	n	n	n		x
davis2011	Davis CL, Tomporowski PD, McDowell JE, Austin BP, Miller PH, Yanasak NE, Allison JD, Naglieri JA.	2011	Exercise improves executive function and achievement and alters brain activation in overweight children: a randomized, controlled trial	y	y	n	n	n	n	n	n	n		10.1007/s10900-015-0070-9
davis2014	Davis M, Abrams MT, Wissow LS, Slade EP.	2014	Identifying young adults at risk of Medicaid enrollment lapses after inpatient mental health treatment	n	y	n	n	n	n	n	n	n		10.1016/j.geoforum.2013.04.002
davis2017	Davis NJ.	2017	Prefrontal electrical stimulation in non-depressed reduces levels of reported negative affects from daily stressors	n	y	n	n	n	n	n	n	n		10.1136/bmjopen-2015-007936
day2018	Day NJS, Hunt A, Cortis-Jones L, Grenyer BFS.	2018	Clinician attitudes towards borderline personality disorder: A 15-year comparison	n	y	n	n	n	n	n	n	n		10.1109/TCSS.2018.2859580
de2016	de Jong G, Schout G.	2016	The erosion of nursing in Dutch mental health care: a critique on the proliferation of psychologists	n	y	n	n	n	n	n	n	n		10.5272/jimab.2015214.991
de2020	de Keijzer C, Bauwelinck M, Dadvand P.	2020	Long-Term Exposure to Residential Greenspace and Healthy Ageing: a Systematic Review	n	n	y	n	n	n	n	n	n		10.1109/TITB.2009.2038481
de2020a	de Oliveira Santos, Geanesson Alberto; do Nascimento, Eriberto Oliveira; Weinschutz, Regina; Mathias, Alvaro Luiz; Trombetta Zannin, Paulo Henrique	2020	Evaluation of tube-shaped bus shelters as a noise mitigation solution for passengers	y	y	n	n	n	n	n	n	n		10.3390/jintelligence6020017
del2016	Del Brutto OH, Mera RM, Gillman J, Zambrano M, Ha JE.	2016	Oily Fish Intake and Cognitive Performance in Community-Dwelling Older Adults: The Atahualpa Project	n	y	n	n	n	n	n	n	n		10.1136/jramc-158-03-22
del2018	Del Pozo MA, Harbeck S, Zahn S, Kliem S, Kr?┬ger C.	2018	Cognitive distortions in anorexia nervosa and borderline personality disorder	n	y	n	n	n	n	n	n	n		10.1017/ipm.2020.68
delaney2016	Delaney KR.	2016	Psychiatric Mental Health Nursing Workforce Agenda: Optimizing Capabilities and Capacity to Address Workforce Demands	n	y	n	n	n	n	n	n	n		10.1186/s12954-017-0170-1
delgado2016	Delgado-Gomez D, Baca-Garcia E, Aguado D, Courtet P, Lopez-Castroman J.	2016	Computerized Adaptive Test vs. decision trees: Development of a support decision system to identify suicidal behavior	n	y	n	n	n	n	n	n	n		10.1186/1753-2000-7-4
demarshall2019	DeMarshall C, Oh E, Kheirkhah R, Sieber F, Zetterberg H, Blennow K, Nagele RG.	2019	Detection of early-stage Alzheimer's pathology using blood-based autoantibody biomarkers in elderly hip fracture repair patients	n	y	n	n	n	n	n	n	n		10.1080/15325024.2016.1187047
derevensky2015	Derevensky, Jeffrey L.; Gilbeau, Lynette	2015	Adolescent Gambling: Twenty-five Years of Research	n	y	n	n	n	n	n	n	n		10.3233/JAD-190262
deshpande2019	Deshpande G, Viraraghavan VS, Duggirala M, Patel S.	2019	Detecting emotional valence using time-domain analysis of speech signals	n	y	n	n	n	n	n	n	n		x
dhillon2019	Dhillon VS, Deo P, Chua A, Thomas P, Fenech M.	2019	Shorter telomere length in carriers of APOE-?┴4 and high plasma concentration of glucose, glyoxal and other advanced glycation end products (AGEs)	n	y	n	n	n	n	n	n	n		10.14219/jada.2014.5
di2012	Di Fede G, Catania M, Morbin M, Giaccone G, Moro ML, Ghidoni R, Colombo L, Messa M, Cagnotto A, Romeo M, Stravalaci M, Diomede L, Gobbi M, Salmona M, Tagliavini F.	2012	Good gene, bad gene: new APP variant may be both	n	y	n	n	n	n	n	n	n		10.1002/14651858.CD008802.pub2
di2014	Di Nardo W, Anzivino R, Giannantonio S, Schinaia L, Paludetti G.	2014	The effects of cochlear implantation on quality of life in the elderly	n	y	n	n	n	n	n	n	n		10.1111/scd.12385
di2019	Di Blasio S, Shtrepi L, Puglisi GE, Astolfi A.	2019	A Cross-Sectional Survey on the Impact of Irrelevant Speech Noise on Annoyance, Mental Health and Well-being, Performance and Occupants' Behavior in Shared and Open-Plan Offices	n	y	n	n	n	n	n	n	n		10.1002/14651858.CD008802.pub3
dickerson2020	Dickerson AS, Wu AC, Liew Z, Weisskopf M.	2020	A Scoping Review of Non-Occupational Exposures to Environmental Pollutants and Adult Depression, Anxiety, and Suicide	n	n	y	n	n	n	n	n	n		10.1002/job.1830
dimakakou2018	Dimakakou E, Johnston HJ, Streftaris G, Cherrie JW.	2018	Exposure to Environmental and Occupational Particulate Air Pollution as a Potential Contributor to Neurodegeneration and Diabetes: A Systematic Review of Epidemiological Research	n	n	y	n	n	n	n	n	n		10.7560/JHS23104
dinan2017	Dinan TG, Cryan JF.	2017	Microbes, Immunity, and Behavior: Psychoneuroimmunology Meets the Microbiome	n	y	n	n	n	n	n	n	n		x
ding2020	Ding N, Li L, Song K, Huang A, Zhang H.	2020	Efficacy and safety of acupuncture in treating post-traumatic stress disorder: A protocol for systematic review and meta-analysis	n	n	y	n	n	n	n	n	n		10.1016/j.scitotenv.2018.06.167
dominguez2019	Dominguez, Matthew; Shrestha, Angela; Ahuja, Amir; Ashley, Kenneth	2019	Treatment in transition: The rapidly evolving landscape of transgender and gender non-binary care	n	y	n	n	n	n	n	n	n		10.1016/j.ijheh.2017.08.004
dong2018	Dong R, Zhang Y, Zhao J.	2018	How Green Are the Streets Within the Sixth Ring Road of Beijing? An Analysis Based on Tencent Street View Pictures and the Green View Index	y	n	n	n	n	n	n	n	n		10.1016/j.jad.2017.10.039
donini2019	Donini M, Monteiro JM, Pontil M, Hahn T, Fallgatter AJ, Shawe-Taylor J, Mour?·o-Miranda J; Alzheimer's Disease Neuroimaging Initiative.	2019	Combining heterogeneous data sources for neuroimaging based diagnosis: re-weighting and selecting what is important	n	y	n	n	n	n	n	n	n		10.1016/j.scitotenv.2020.140914
dounias2017	Dounias E, Ichikawa M.	2017	Seasonal Bushmeat Hunger in the Congo Basin	y	n	n	n	n	n	n	n	n		10.3390/sports7080182
doyle2018	Doyle, Dennis	2018	We Didn't Know You Were a Negro: Fredric Wertham and the Ironies of Race, Comic Books, and Juvenile Delinquency in the 1950s	y	y	n	n	n	n	n	n	n		10.1071/RJ18052
drescher2019	Drescher, Christopher F.; Griffin, James A.; Casanova, Tracy; Kassing, Francesca; Wood, Elizabeth; Brands, Susan; Stepleman, Lara M.	2019	Associations of physical and sexual violence victimisation, homelessness, and perceptions of safety with suicidality in a community sample of transgender individuals	n	y	n	n	n	n	n	n	n		10.1186/s12971-015-0059-2
druss2018	Druss BG, Goldman HH.	2018	Integrating Health and Mental Health Services: A Past and Future History	n	y	n	n	n	n	n	n	n		10.1016/j.nut.2009.09.014
duan2020	Duan, Lijuan; Lian, Zhaoyang; Chen, Juncheng; Qiao, Yuanhua; Miao, Jun; Li, Mingai	2020	Classification of epilepsy period based on combination feature extraction methods and spiking swarm intelligent optimization algorithm	y	y	n	n	n	n	n	n	n		10.1016/j.neuroimage.2018.09.057
dubovick2010	Dubovick?ó M.	2010	Neurobehavioral manifestations of developmental impairment of the brain	n	y	n	n	n	n	n	n	n		10.1007/s11059-017-0392-y
dubreucq2020	Dubreucq M, Jourdan S, Poizat A, Dubreucq J.	2020	[Midwives' feelings about the post-partum care of women with severe mental illness: A qualitative analysis]	n	y	n	n	n	n	n	n	n		10.1016/j.jaac.2018.04.014
dutta2016	Dutta, Sandipayan; Srivastava, Smriti; Panda, Soma; Thakur, Devesh; Pokhrel, Dhiraj; Venkatesh, Thuppil	2016	Estimation of Lead (Pb) in Toys Using X-Ray Fluorescence Technology	y	n	n	n	n	n	n	n	n		10.1002/mds.27884
dyrbye2012	Dyrbye LN, Harper W, Moutier C, Durning SJ, Power DV, Massie FS, Eacker A, Thomas MR, Satele D, Sloan JA, Shanafelt TD.	2012	A multi-institutional study exploring the impact of positive mental health on medical students' professionalism in an era of high burnout	n	y	n	n	n	n	n	n	n		10.1007/s00038-017-0958-5
dzhambov2019a	Dzhambov AM, Lercher P.	2019	Road Traffic Noise Exposure and Depression/Anxiety: An Updated Systematic Review and Meta-Analysis	n	n	y	n	n	n	n	n	n		10.1002/14651858.CD010351.pub2
dzhambov2020	Dzhambov AM, Browning MHEM, Markevych I, Hartig T, Lercher P.	2020	Analytical approaches to testing pathways linking greenspace to health: A scoping review of the empirical literature	n	n	y	n	n	n	n	n	n		10.1176/appi.ps.201000512
eaton2013	Eaton WW, Roth KB, Bruce M, Cottler L, Wu L, Nestadt G, Ford D, Bienvenu OJ, Crum RM, Rebok G, Anthony JC, Mu??oz A.	2013	The relationship of mental and behavioral disorders to all-cause mortality in a 27-year follow-up of 4 epidemiologic catchment area samples	n	y	n	n	n	n	n	n	n		10.1145/3329189.3329213
economou2016	Economou M, Angelopoulos E, Peppou LE, Souliotis K, Stefanis C.	2016	Major depression amid financial crisis in Greece: Will unemployment narrow existing gender differences in the prevalence of the disorder in Greece?	n	y	n	n	n	n	n	n	n		10.1007/s11089-015-0654-4
eden2017	Eden, K.; Grosz, A. E.; Grosz, J. E.; Giles, C. J.; Foley, J. Y.	2017	Gold and associated industrial heavy minerals in the Icy Cape District: White River to Icy Cape, Alaska, USA	y	n	n	n	n	n	n	n	n		10.1093/brain/aww244
edgcomb2019	Edgcomb J, Shaddox T, Hellemann G, Brooks JO 3rd.	2019	High-Risk Phenotypes of Early Psychiatric Readmission in Bipolar Disorder With Comorbid?ßMedical Illness	n	y	n	n	n	n	n	n	n		10.1177/1363461512448325
eggener2014	Eggener S.	2014	Commentary on "Intermittent versus continuous androgen deprivation in prostate cancer." Hussain M, Tangen CM, Berry DL, Higano CS, Crawford ED, Liu G, Wilding G, Prescott S, Kanaga Sundaram S, Small EJ, Dawson NA, Donnelly BJ, Venner PM, Vaishampayan UN, Schellhammer PF, Quinn DI, Raghavan D, Ely B, Moinpour CM, Vogelzang NJ, Thompson IM Jr, University of Michigan, Division of Hematology/Oncology…	y	n	n	n	n	n	n	n	n		x
[truncated: 981 more rows]

## Sheet: Table Info
Paper ID code	Authors	Year	Title	Rejected: Mental health scope	Rejected: Environmental Science scope	Rejected: Review paper	Rejected: Opinion paper	Rejected: Descriptive paper	Rejected: non-human	Rejected: other	Potentially relevant	COVID	Comments
[truncated: 1 more rows]
