# Supplementary material for: The Contribution of Environmental Science to Mental Health Research: A Scoping Review
Source: Int J Environ Res Public Health. 2023 Mar 27;20(7):5278. doi: 10.3390/ijerph20075278 (PMC10094550; doi:10.3390/ijerph20075278)
Supplement: Supplementary file 1 [file ijerph-20-05278-s001.zip › Table S5 - Abstract Screening - Supplementary Material.xlsx]

## Sheet: Table S5
Abstract screening and classification of papers on the contribution of environmental science to mental health research. Screening and classification carried out by MR, with unclear papers checked with KI, MC and KC.
			Rejected								Physical														Biological							Chemical						Mental helath
Paper ID code	Title	Rejected?	Mental health	Environmental Science scope	Review paper	Opinion paper	Descriptive paper	non-human	other1	other	Natural disaster (not specified)	Climate change	Flooding	water security	Drought	Landslide	Earthquake	Tsunami	Hurrican	Noise	Weather	Tornado	Temperature	Fire	Greenspace/Natural	Bluespace	Ecosytem	Individual species	Forests	Land use	Biodiversity	Air pollution	Water pollution	Pollution general	Air quality	Water quality	Oil spill	General mental health	Exhaustion disorder	Psychotic disorders	Stress	suicide	Depression	bipolar	OCD	Anxiety	PTSD	Substance abuse	Schizophrenia
vivattene2020	A method for monetising the mental health costs of flooding	n							0				1																									1
welton2018	Evidence-based mental health integrated disaster prepardness in Nepal and Haiti	n							0		1		1			1																						1
akerkar2017	Gender, place and mental health recovery in disasters: Addressing issues of equality and difference	n							0				1																									1
alderman2013	Assessment of the health impacts of the 2011 summer floods in Brisbane	n							0				1																									1
amin2020	Support for Students Exposed to Trauma (SSET) Program: An Approach for Building Resilience and Social Support Among Flood-Impacted Children	n							0				1																																		1
asim2019	Post-Traumatic Stress Disorder among the Flood Affected Population in Indian Subcontinent	n							0				1																																		1
austin2017	Moderating effects of maternal emotional availability on language and cognitive development in toddlers of mothers exposed to a natural disaster in pregnancy: The QF2011 Queensland Flood Study	n							0				1
bandla2019	Psychiatric morbidity in December 2015 flood-affected population in Tamil Nadu, India	n							0				1																														1			1	1	1
bei2013	A prospective study of the impact of floods on the mental and physical health of older adults	n							0				1																									1									1
bhat2019	Socio-demographic Profile and Psychiatric Morbidity of Flood Victims in a Mental Health Camp	n							0				1																									1					1			1	1
brock2015	Peritraumatic Distress Mediates the Effect of Severity of Disaster Exposure on Perinatal Depression: The Iowa Flood Study	n							0				1																									1					1
butler2018	Narratives of recovery after floods: Mental health, institutions, and intervention	n							0				1																									1
canan2020	The Association between General and Pathological Dissociation and Disaster-Related Psychopathology in Directly Exposed Survivors	n							0				1											1														1		1			1			1	1	1
carroll2010	Health and social impacts of a flood disaster: responding to needs and implications for practice	n							0				1																									1
channaveerachari2015	Psychiatric and medical disorders in the after math of the uttarakhand disaster: assessment, approach, and future challenges	n							0				1																									1
clemens2013	Summer of sorrow: measuring exposure to and impacts of trauma after Queensland's natural disasters of 2010-2011	n							0				1						1
collins2013	Hispanic health disparities after a flood disaster: results of a population-based survey of individuals experiencing home site damage in El Paso (Texas, USA)	n							0				1																									1
contreras2018	Community strengthening and mental health system linking after flooding in two informal human settlements in Peru: a model for small-scale disaster response	n							0				1																														1
crabtree2013	Questioning Psychosocial Resilience After Flooding and the Consequences for Disaster Risk Reduction	n							0				1																														1				1
crombach2018	Impact and cultural acceptance of the Narrative Exposure Therapy in the aftermath of a natural disaster in Burundi	n							0				1																																		1
dai2016	Predictors of recovery from post-traumatic stress disorder after the dongting lake flood in China: a 13-14 year follow-up study	n							0				1																																		1
dai2016a	Association between social support and recovery from post-traumatic stress disorder after flood: a 13-14 year follow-up study in Hunan, China	n							0				1																																		1
dar2018	PTSD and depression in adult survivors of flood fury in Kashmir: The payoffs of social support	n							0				1																																		1
felix2020	The influence of flood exposure and subsequent stressors on youth social-emotional health	n							0				1																									1
fitzgerald2020	Cross sectional analysis of depression amongst Australian rural business owners following cyclone-related flooding	n							0				1																														1
foudi2017	The effect of flooding on mental health: Lessons learned for building resilience	n							0				1																									1			1
french2019	Impact of repeat flooding on mental health and health-related quality of life: a cross-sectional analysis of the English National Study of Flooding and Health	n							0				1																														1			1	1
gafencu2014	Resilience centered approach for children during floods	n							0				1																																		1
graham2019	Flood- and Weather-Damaged Homes and Mental Health: An Analysis Using England's Mental Health Survey	n							0				1																									1
greene2015	Resilience and Vulnerability to the Psychological Harm From Flooding: The Role of Social Cohesion	n							0				1																									1
harville2015	When is exposure to a natural disaster traumatic? Comparison of a trauma questionnaire and disaster exposure inventory	n							0				1						1																								1				1
hassan2018a	Children's Reactions to Flood Disaster in Kashmir	n							0				1																																		1
hayes2020	Psychosocial adaptation to climate change in High River, Alberta: implications for policy and practice	n							0				1																									1
hayward2018	Social Work Perspectives on Climate Change and Vulnerable Populations in the Caribbean: Environmental Justice and Health	n							0				1						1																			1
he2016	Temporal and Spatial Patterns in Utilization of Mental Health Services During and After Hurricane Sandy: Emergency Department and Inpatient Hospitalizations in New York City	n							0				1																									1
hetherington2018	Risk and Protective Factors for Mental Health and Community Cohesion After the 2013 Calgary Flood	n							0				1																									1
hu2015	Recovery from post-traumatic stress disorder after a flood in China: a 13-year follow-up and its prediction by degree of collective action	n							0				1																																		1
idris2018	MENTAL HEALTH DISORDER AMONG POST FLOOD VICTIMS IN PAHANG	n							0				1																																		1
karmegam2020	Spatio-temporal distribution of negative emotions on Twitter during floods in Chennai, India, in 2015: a post hoc analysis	n							0				1
khan2014	Is area affected by flood or stagnant water independently associated with poorer health outcomes in urban slums of Dhaka and adjacent rural areas?	n							0				1
kildea2018	Continuity of midwifery carer moderates the effects of prenatal maternal stress on postnatal maternal wellbeing: the Queensland flood study	n							0				1																														1			1
king2015a	QF2011: a protocol to study the effects of the Queensland flood on pregnant women, their pregnancies, and their children's early development	n							0				1
kingston2019	Prediction and Understanding of Resilience in Albertan Families: Longitudinal Study of Disaster Responses (PURLS) - Protocol	n							0				1																									1			1
lamond2015	An exploration of factors affecting the long term psychological impact and deterioration of mental health in flooded households	n							0				1																									1
lebowitz2019	Post-flood social support networks and morbidity in J??s?? City, Japan	n							0				1																									1					1				1
lemieux2019	Social Work Students in the Aftermath of the Great Flood of 2016: Mental Health, Substance Use, and Adaptive Coping	n							0				1																									1
lieberman2017	Self-Reported and FEMA Flood Exposure Assessment after Hurricane Sandy: Association with Mental Health Outcomes	n							0				1																														1			1	1
longman2019	Rationale and methods for a cross-sectional study of mental health and wellbeing following river flooding in rural Australia, using a community-academic partnership approach	n							0				1																									1
magalhaes2018	Psychometric properties of a Brazilian Portuguese version of the Children's Revised Impact of Event Scale (CRIES-8)	n							0				1		1																																1
maghrabi2012	Impact of Flood Disaster on the Mental Health of Residents in the Eastern Region of Jeddah Governorate, 2010: A Study in Medical geography	n							0				1																									1
masson2019	We can help ourselves: does community resilience buffer against the negative impact of flooding on mental health?	n							0				1																									1
matthews2019a	Differential Mental Health Impact Six Months After Extensive River Flooding in Rural Australia: A Cross-Sectional Analysis Through an Equity Lens	n							0				1																													1	1			1	1
milojevic2017	Mental health impacts of flooding: a controlled interrupted time series analysis of prescribing data in England	n							0				1																									1
minakshi2020	Mental Health Problems in Wake of Disaster: A Gendered Perspective	n							0				1																														1			1	1
moss2017	A potential psychological mechanism linking disaster-related prenatal maternal stress with child cognitive and motor development at 16 months: The QF2011 Queensland Flood Study	n							0				1
mulchandani2019	Effect of Insurance-Related Factors on the Association between Flooding and Mental Health Outcomes	n							0				1																									1									1
mulchandani2020	The English National Cohort Study of Flooding & Health: psychological morbidity at three years of follow up	n							0				1																														1			1	1
munro2017	Effect of evacuation and displacement on the association between flooding and mental health outcomes: a cross-sectional analysis of UK survey data	n							0				1																														1			1	1
ng2015	Climate adversity and resilience: the voice of rural Australia	n							0				1		1
ogunbode2019	The resilience paradox: flooding experience, coping and climate change mitigation intentions	n							0				1
okaka2019	Households' perception of flood risk and health impact of exposure to flooding in flood-prone informal settlements in the coastal city of Mombasa	n							0				1																									1
paranjothy2011	Psychosocial impact of the summer 2007 floods in England	n							0				1																									1					1			1	1
philippe2019	Cognitive integration of personal or public events affects mental health: Examining memory networks in a case of natural flooding disaster	n							0				1																									1
raguenaud2012	Epidemiological surveillance linked to an outreach psychological support program after the Xynthia storm in Charente-Maritime, France, 2010	n							0				1																									1
sahni2016	Public health surveillance response following the southern Alberta floods, 2013	n							0				1																									1
sansom2017	The Impacts of Exposure to Environmental Risk on Physical and Mental Health in a Small Geographic Community in Houston, TX	n							0				1																						1			1
seyedin2017	Psychological sequels of flood on residents of southeast Caspian region	n							0				1																																		1
shultz2013	Mitigating flood exposure: Reducing disaster risk and trauma signature	n							0				1																									1
simcock2019	A cross-lagged panel analysis of children's sleep, attention, and mood in a prenatally stressed cohort: The QF2011 Queensland flood study	n							0				1																														1			1
sitwat2015	Psychopathology, Psychiatric Symptoms and their Demographic Correlates in Female Adolescents Flood Victims	n							0				1																														1			1	1
stough2018	The association of adverse mental health effects with repeated exposure to disasters	n							0				1									1														1		1									1
tempest2017	Secondary stressors are associated with probable psychological morbidity after flooding: a cross-sectional analysis	n							0				1																														1			1	1
thieken2016	The flood of June 2013 in Germany: how much do we know about its impacts?	n							0				1																									1
van2015b	Strategies to enhance resilience post-natural disaster: a qualitative study of experiences with Australian floods and fires	n							0				1																									1
wade2015	Skills for Psychological Recovery: Evaluation of a post-disaster mental health training program	n							0				1						1																			1
waite2017	The English national cohort study of flooding and health: cross-sectional analysis of mental health outcomes at year one	n							0				1																									1								1	1
watkiss2012	Projection of economic impacts of climate change in sectors of Europe based on bottom up analysis: human health	n							0				1																									1
wei2020	Association between floods and hospital admissions for schizophrenia in Hefei, China: The lag effects of degrees of floods and time variation	n							0				1																																				1
wind2012	The mechanisms that associate community social capital with post-disaster mental health: a multilevel model	n							0				1																																		1
wind2013	The impact of recurrent disasters on mental health: a study on seasonal floods in northern India	n							0				1																									1					1			1
wind2014	The effect of the postdisaster context on the assessment of individual mental health scores	n							0				1																														1			1
wind2018	Closing the gap between disaster mental health research and practice: evidence for socio-ecological mental health interventions through multilevel research	n							0				1																									1
wolsko2016	Disasters, migrations, and the unintended consequences of urbanization: What's the harm in getting out of harm's way?	n							0				1																									1
woodhall2019	Perceptions of Mental Health and Wellbeing Following Residential Displacement and Damage from the 2018 St. John River Flood	n							0				1
yoda2017	Relationship Between Long-term Flooding and Serious Mental Illness After the 2011 Flood in Thailand	n							0				1																									1
sattler2017	Climate Change and Extreme WeatherEvents: The Mental Health Impact	y			1				0			1									1																	1
adams2020	Water insecurity and urban poverty in the Global South: Implications for health and human biology	y			1				0
aerts2018	Biodiversity and human health: mechanisms and evidence of the positive health effects of diversity in nature and green spaces	y			1				0																1			1
ardalan2019	Impact of climate change on community health and resilience in Ethiopia: A review article	y			1				0
attademo2020	Air Pollution as Risk Factor for Mental Disorders: In Search for a Possible Link with Alzheimer's Disease and Schizophrenia	y			1				0
azzazy2020	A critical review on the impact of built environment on users' measured brain activity	y			1				0
bangpan2019	Mental health and psychosocial support programmes for adults in humanitarian emergencies: a systematic review and meta-analysis in low and middle-income countries	y			1				0
barnes2019	Characterizing Nature and Participant Experience in Studies of Nature Exposure for Positive Mental Health: An Integrative Review	y			1				0
beemer2019	A brief review on the mental health for select elements of the built environment	y			1				0
belojevi2016	Recent advances in research on non-auditory effects of community noise	y			1				0
berry2010	Climate change and mental health: a causal pathways framework	y			1				0
berry2011	Climate change and farmers' mental health: risks and responses	y			1				0
bhagwat2017	Not quite out of the woods': potential for misdiagnosis of delayed neurologic syndrome of carbon monoxide poisoning as relapse of mental illness	y		1	1				0
bhamani2012	Mental health in the wake of flooding in pakistan: an ongoing humanitarian crisis	y			1				0
blashki2011	Preparing health services for climate change in Australia	y			1				0
boda2019	Understanding the effects of air pollution on neurogenesis and gliogenesis in the growing and adult brain	y			1				0
bos2014	Physical activity, air pollution and the brain	y			1				0
braithwaite2019	Air Pollution (Particulate Matter) Exposure and Associations with Depression, Anxiety, Bipolar, Psychosis and Suicide Risk: A Systematic Review and Meta-Analysis	y			1				0
bratman2012	The impacts of nature experience on human cognitive function and mental health	y			1				0
buckley2017	Economic Value of Parks via Human Mental Health: An Analytical Framework	y			1				0
buoli2018	Is there a link between air pollution and mental disorders?	y			1				0
burke2018	The Psychological Effects of Climate Change on Children	y			1				0
burton2016	Health effects of flooding in Canada: A 2015 review and description of gaps in research	y			1				0
calder2017	Apolipoprotein E4, Gender, Body Mass Index, Inflammation, Insulin Resistance, and Air Pollution Interactions: Recipe for Alzheimer's Disease Development in Mexico City Young Females	y			1				0
chalupka2020	Climate Change, Climate Justice, and Children's Mental Health: A Generation at Risk?	y			1				0
chan2019	Health impact of climate change in cities of middle-income countries: the case of China	y			1				0
chen2017	Effect of Haze on Human Health and Prevention	y	1		1				0
chersich2018	Impacts of Climate Change on Health and Wellbeing in South Africa	y			1				0
chirico2019	Letter to the editor (January 1, 2019) concerning the paper "Impact of air pollution on depression and suicide"	y			1				0
cianconi2019	Mental health issues among indigenous communities and the role of traditional medicine	y			1				0
cipriani2018	Danger in the Air: Air Pollution and Cognitive Dysfunction	y			1				0
committee2015	Psychosocial Interventions for Mental and Substance Use Disorders: A Framework for Establishing Evidence-Based Standards	y			1				0
cucurachi2012	Towards a general framework for including noise impacts in LCA	y			1				0
cyniak2019	The Relationship Between Temperament Traits and Post-Traumatic Stress Disorder Symptoms and Its Moderators: Meta-Analysis and Meta-Regression	y			1				0
dalessandro2015	Green areas and public health: improving wellbeing and physical activity in the urban context	y			1				0
dannenberg2019	Managed retreat as a strategy for climate change adaptation in small communities: public health implications	y			1				0
davis2019	Exposure to environmental toxicants and young children's cognitive and social development	y			1				0
de2018	The Effects of Air Pollution on the Brain: a Review of Studies Interfacing Environmental Epidemiology and Neuroimaging	y			1				0
dolan2012	Losing sight of the wood for the trees: some issues in describing and valuing health, and another possible approach	y		1	1				0
du2010	Health impacts of floods	y			1				0
dumont2020	Climate Change and Risk of Completed Suicide	y			1				0
dunn2018	Wearables and the medical revolution	y			1				0
dyregrov2018	Children and natural disasters	y			1				0
eskenazi2020	The International Society for Children's Health and the Environment Commits to Reduce Its Carbon Footprint to Safeguard Children's Health	y			1				0
garcia2016	Extreme Weather-driven Disasters and Children's Health	y			1				0
garg2012	GLOBAL WARMING AND MENTAL HEALTH	y			1				0
garza2019	Arsenic-induced neurotoxicity: a mechanistic appraisal	y			1				0
genc2012	The adverse effects of air pollution on the nervous system	y			1				0
gillis2016	Meta-analysis of Treatment Outcomes Measured by the Y-OQ and Y-OQ-SR Comparing Wilderness and Non-wilderness Treatment Programs	y			1				0
gladkikh2019	Cultural ecosystem services and the well-being of refugee communities	y			1				0
godsmark2019	Priority focus areas for a sub-national response to climate change and health: A South African provincial case study	y			1				0
gruebner2017	Cities and Mental Health	y			1				0
hankey2017	Urban Form, Air Pollution, and Health	y			1				0
hayes2018	Climate change and mental health: risks, impacts and priority actions	y			1				0
hayes2018a	Addressing Mental Health in a Changing Climate: Incorporating Mental Health Indicators into Climate Change and Health Vulnerability and Adaptation Assessments	y			1				0
hayes2019	Factors Influencing the Mental Health Consequences of Climate Change in Canada	y			1				0
hijar2016	[El ni??o phenomenon and natural disasters: public health interventions for disaster preparedness and response]	y			1				1	language
hirsch2018	Psychosocial Impact of Fracking: a Review of the Literature on the Mental Health Consequences of Hydraulic Fracturing	y			1				0
hoare2019	The impact of urbanization on mood disorders: an update of recent evidence	y			1				0
hoisington2019	Ten questions concerning the built environment and mental health	y			1				0
jaakkola2018	The Holistic Effects of Climate Change on the Culture, Well-Being, and Health of the Saami, the Only Indigenous People in the European Union	y			1				0
johal2016	A research-based primer on the potential psychosocial impacts of flooding	y			1				0
kameg2020	Climate Change and Mental Health: Implications for Nurses	y			1				0
kar2010	Indian research on disaster and mental health	y			1				0
karjalainen2010	Promoting human health through forests: overview and major challenges	y			1				0
kilian2018	The emerging risk of exposure to air pollution on?ßcognitive decline and Alzheimer's disease - Evidence from epidemiological and animal studies	y			1				0
kim2020	Possible Application of Ecological Momentary Assessment to Older Adults' Daily Depressive Mood: Integrative Literature Review	y		1	1				0
kinay2019	Direct and indirect health impacts of climate change on the vulnerable elderly population in East China	y			1				0
klatte2013	Does noise affect learning? A short review on noise effects on cognitive performance in children	y			1				0
kousky2016	Impacts of Natural Disasters on Children	y			1				0
krawisz2020	Health Effects of Climate Destabilization: Understanding the Problem	y			1				0
krystal2014	Psychiatric disorders: diagnosis to therapy	y		1	1				0
kuo2015	How might contact with nature promote human health? Promising mechanisms and a possible central pathway	y			1				0
lanphear2015	The impact of toxins on the developing brain	y			1				0
leibold2018	Assessing Panic: Bridging the Gap Between Fundamental Mechanisms and Daily Life Experience	y			1				0
lima2020a	A Review of the Relation between Household Indoor Temperature and Health Outcomes	y			1				0
logan2014	Nutritional psychiatry research: an emerging discipline and its intersection with global urbanization, environmental challenges and the evolutionary mismatch	y		1	1				0
logan2015	Natural environments, ancestral diets, and microbial ecology: is there a modern "paleo-deficit disorder"? Part II	y		1	1				0
mansor2017	Conceptual Models of Greenspace and Health	y			1				0
mantler2015	Natural environments and mental health	y			1				0
maughan2015	Mind games: standing by while the world ignores climate change	y			1				0
misiak2020	Air pollution and mental health: Moving the field forward	y			1				0
morozov2018	Mental health and urbanization: a Russian perspective	y			1				0
mousavi2020	Climate change and health in Iran: a narrative review	y			1				0
nieuwenhuijsen2017	Fifty Shades of Green: Pathway to Healthy Urban Living	y			1				0
nurse2010	An ecological approach to promoting population mental health and well-being--a response to the challenge of climate change	y			1				0
odeh2017	Gardening for Therapeutic People-Plant Interactions during Long-Duration Space Missions	y			1				0
okkels2018	Urban mental health: challenges and perspectives	y			1				0
othman2020	Exploring Neuro-Landscape Theory Interfaced with Pro-Environment Behaviour Theory for Psychological Restoration of Low Income Group	y			1				0
owoaje2016	A review of the health problems of the internally displaced persons in Africa	y		1	1				0
palinkas2020	Global climate change and mental health	y			1				0
patil2015	Identifying Gaps in Health Research among Refugees Resettled in Canada	y		1	1				0
patz2014	Climate change: challenges and opportunities for global health	y			1				0
paul2019a	Ambient Air Pollution, Noise, and Late-Life Cognitive Decline and Dementia Risk	y			1				0
petkova2014	Health impacts of heat in a changing climate: how can emerging science inform urban adaptation planning?	y			1				0
pimentel2018	States of Mind, Body, and Planet: Improving the Human Condition through Virtual Experiences	y			1				0
pirrera2010	Nocturnal road traffic noise: A review on its assessment and consequences on sleep and health	y			1				0
randolph2019	Disaster Medicine: Public Health Threats Associated With Disasters	y			1				0
reichert2020	Studying the impact of built environments on human mental health in everyday life: methodological developments, state-of-the-art and technological frontiers	y			1				0
salvi2019	Neurobehavioral Consequences of Traffic-Related Air Pollution	y			1				0
sarris2019	Harnessing the Four Elements for Mental Health	y			1				0
schikowski2020	The role of air pollution in cognitive impairment and decline	y			1				0
schneider2017	Thermal Control, Weather, and Aging	y			1				0
schulte2016	Advancing the framework for considering the effects of climate change on worker safety and health	y			1				0
shorthouse2018	Inequity amplified: climate change, the Australian farmer, and mental health	y			1				0
sinyor2017	Global trends in suicide epidemiology	y			1				0
sram2017	The impact of air pollution to central nervous system in children and adults	y			1				0
stanke2012	The effects of flooding on mental health: Outcomes and recommendations from a review of the literature	y			1				0
stansfeld2015	Health Effects of Noise Exposure in Children	y			1				0
summers2018	Ecotherapy - A Forgotten Ecosystem Service: A Review	y			1				0
tischer2013	Exposure assessment of residential mould, fungi and microbial components in relation to children's health: achievements and challenges	y			1				0
tong2017	Flooding-related displacement and mental health	y			1				0
trudel2016	Psychiatric, Psychological, and Social Determinants of Health in the Nurses' Health Study Cohorts	y			1				0
tzivian2015	Effect of long-term outdoor air pollution and noise on cognitive and psychological functions in adults	y			1				0
van2019	Environmental Exposures and Depression: Biological Mechanisms and Epidemiological Evidence	y			1				0
veenema2017	Climate Change-Related Water Disasters' Impact on Population Health	y			1				0
ventriglio2020	Urbanization and emerging mental health issues	y			1				0
verner2016	Health in climate change research from 1990 to 2014: positive trend, but still underperforming	y			1				0
vincent2018	Sleep in wildland firefighters: what do we know and why does it matter?	y			1				0
walton2018	Tainted air: The link between pollution and Alzheimer's disease	y			1				0
webster2015	GREEN EQUALS HEALTHY? TOWARDS AN EVIDENCE BASE FOR HIGH DENSITY HEALTHY CITY RESEARCH	y			1				0
yusa2015	Climate Change, Drought and Human Health in Canada	y			1				0
ziemelniece2019	The transformation of the cultural landscape of Latvian rehabilitation gardens and parks	y		1	1				0
amorosi2018	Ecosustainibility and Mental Health: female aspects	y				1			0
anderson2011	Mental health and global well-being	y				1			0
backovi2010	[Mental hygiene: ideas and practice in Serbia]	y				1			0
becker2013	GLOBAL HEALTH Mental Health and the Global Agenda	y				1			0
clayton2018	Mental health risk and resilience among climate scientists	y				1			0
clayton2020	Climate anxiety: Psychological responses to climate change	y				1			0
cusack2011	Heatwaves and their impact on people with alcohol, drug and mental health conditions: a discussion paper on clinical practice considerations	y				1			0
dangiulli2018	Severe Urban Outdoor Air Pollution and Children's Structural and Functional Brain Development, From Evidence to Precautionary Strategic Action	y				1			0
dustin2010	People and Nature: Toward an Ecological Model of Health Promotion	y				1			0
every2016	Climate change and psychiatry	y				1			0
fleming2018a	Beyond Climate Change and Health: Integrating Broader Environmental Change and Natural Environments for Public Health Protection and Promotion in the UK	y				1			0
friel2011	Climate change, noncommunicable diseases, and development: the relationships and common policy opportunities	y				1			0
griffiths2013	Improving public health by tackling climate change	y				1			0
ingle2020	Mental health and climate change: tackling invisible injustice	y				1			0
jevtic2017	Mental Health & the role of mindset in Climate Change issues	y				1			0
kirch2018	Addressing the Health Effects of Climate Change: an Approach Based on Evidence and Ethics	y				1			0
kjellstrom2013	Climate change threats to population health and well-being: the imperative of protective solutions that will last	y				1			0
majeed2017	The impact of climate change on youth depression and mental health	y				1			0			1																										1					1
mcmichael2011	Climate change: present and future risks to health, and necessary responses	y				1			0
mcmichael2011a	Drought, drying and mental health: lessons from recent experiences for future risk-lessening policies	y				1			0
mcmichael2014	Climate Change and Children: Health Risks of Abatement Inaction, Health Gains from Action	y				1			0
mitra2014a	Psychiatry in 21(st) century: The road ahead	y				1			0
nahar2014	Increasing the provision of mental health care for vulnerable, disaster-affected people in Bangladesh	y				1			0
negev2019	Adaptation of health systems to climate-related migration in Sub-Saharan Africa: Closing the gap	y				1			0
nomikos2018	Place Matters	y				1			0
padhy2015	Mental health effects of climate change	y				1			0
page2010	The impact of climate change on mental health (but will mental health be discussed at Copenhagen?)	y				1			0
parker2019a	The Changing Climate: Managing Health Impacts	y				1			0
penner2010	Assault Rifles, Separated Families, and Murder in Their Eyes: Unasked Questions after Hurricane Katrina	y	1			1			0
phua2015	Redesigning healthcare systems to meet the health challenges associated with climate change in the twenty-first century	y				1			0
prescott2016	Transforming Life: A Broad View of the Developmental Origins of Health and Disease Concept from an Ecological Justice Perspective	y				1			0
sanson2019	Responding to the Impacts of the Climate Crisis on Children and Youth	y				1			0
sarris2014	Lifestyle medicine for depression	y				1			0
seritan2020	The Time Is Now: Climate Change and Mental Health	y				1			0
sharma2020	Air pollution and geriatric mental health: perspectives on the COVID-19 pandemic	y				1			0
sun2011	Scope definition of social impact of the Blue-green algae event in Taihu Lake and necessity and feasibility of research	y				1			0
torres2017	The centrality of social ties to climate migration and mental health	y				1			0
trombley2017	Climate Change and Mental Health	y				1			0
usher2019	Eco-anxiety: How thinking about climate change-related environmental decline is affecting our mental health	y				1			0
van2017b	Perspective on Children's public mental health and climate change	y				1			0
wiley2019	The unseen impacts of climate change on mental health	y				1			0
bratman2019	Nature and mental health: An ecosystem service perspective	y					1		0
dean2011	Does biodiversity improve mental health in urban settings?	y					1		0
fernee2017	Unpacking the Black Box of Wilderness Therapy: A Realist Synthesis	y					1		0
fitzgerald2016	Revitalizing sociology: urban life and mental illness between history and the present	y					1		0
gifford2016	The largely unacknowledged impact of climate change on mental health	y					1		0
jarosi2018	Development of the WHO Environmental Noise Guidelines for the European Region: An Introduction	y					1		0
kretzschmar2012	Mental health in the Republic of The Gambia	y					1		0
lapaige2010	Innoversity in knowledge-for-action and adaptation to climate change: the first steps of an 'evidence-based climatic health' transfrontier training program	y					1		0
lederbogen2013	Urban social stress--risk factor for mental disorders. The case of schizophrenia	y					1		0
lerner2017	A Comparison of Three Holistic Approaches to Health: One Health, EcoHealth, and Planetary Health	y					1		0
logan2012	Vis Medicatrix naturae: does nature "minister to the mind"?	y					1		0
moriyama2013	Mental healthcare efforts for the public after the Great East Japan Earthquake "Guide to Good Mental Health for Those Affected by Natural Disasters" published by the Cabinet Office	y					1		0
powers2019	Radical Self-Care for Social Workers in the Global Climate Crisis	y					1		0
jenkins2012	The mental health impacts of disasters	n							0		1																											1
grant2018	Disaster preparedness to reduce anxiety and post-disaster stress	n							0		1																											1
havea2017	Preparing for Better Livelihoods, Healthand Well-Being—A Key to ClimateChange Adaptation	n							0			1
roberts2017	Forest schools and mental wellbeing	n							0																				1
luber2015	Global climate change and human health: From Science to Practise	n							0			1																										1
bragg2013	Ecominds effects on mental wellbeing: An evaluation for Mind	n							0																1													1
demeniex2014	Losing our minds: How environmental pollution impairs human intellengence and mental health	n							0																							1	1
chen2018	Air pollution and mental health: Evidence from China	n							0																							1						1
chowdhury2016	Arsenic contamination of drinking water and metla health	n							0																								1					1
clayton2018	Psychology and Climate Change: human perceptions, impacts and responses	n							0			1																										1
aboujaoude2020a	From Digital Mental Health Interventions to Digital "Addiction": Where the Two Fields Converge	y		1					0
abraham2017	Situating mental health work in place: Qualitative findings from interviews with Veterans in Southeastern Louisiana and Northern California	n							0																1													1
abu2018	Rapidly Progressive Alzheimer's Disease: Contributions to Clinical-Pathological Definition and Diagnosis	y		1					0
wezanamo2018	Psychological distance of climate change and mental health risks assessment of smallholder farmers in Northern Ghana: Is habituation a threat to climate change?	n							0			1
acton2016	The Impact of Immersive Outdoor Activities in Local Woodlands on Young Carers Emotional Literacy and Well-Being	n							0																1
adamis2011	THE IMPACT OF WILDFIRES ON MENTAL HEALTH OF RESIDENTS IN A RURAL AREA OF GREECE. A CASE CONTROL POPULATION BASED STUDY	y							1	conference														1
adayonfo2017	Depressed patients seen at the University of Benin Teaching Hospital (UBTH): a six-year review	y		1					0
aebi2020	Patterns of cross-sectional and predictive physical activity in Swiss adults aged 52+: results from the SAPALDIA cohort	y		1					0
aerts2020	Residential green space and seasonal distress in a cohort of tree pollen allergy patients	n							0																													1
afifi2012	The impact of uncertainty and communal coping on mental health following natural disasters	n							0															1														1
afzali2019	Machine-learning prediction of adolescent alcohol use: a cross-study, cross-cultural validation	y		1					0
agyapong2018	Prevalence Rates and Predictors of Generalized Anxiety Disorder Symptoms in Residents of Fort McMurray Six Months After a Wildfire	n							0															1																						1
agyapong2020	Long-Term Mental Health Effects of a Devastating Wildfire Are Amplified by Socio-Demographic and Clinical Antecedents in Elementary and High School Staff	n							0															1																			1			1	1
aiena2016	Meaning, Resilience, and Traumatic Stress After the Deepwater Horizon Oil Spill: A Study of Mississippi Coastal Residents Seeking Mental Health Services	n							0																												1	1									1
ailshire2014	Fine particulate matter air pollution and cognitive function among older US adults	n							0																							1
akhter2015	Issues with families and children in a disaster context: A qualitative perspective from rural Bangladesh	n							0		1																											1
akter2019	Impact of drinking water salinity on children's education: Empirical evidence from coastal Bangladesh	n							0																											1
al2011	Traffic-generated noise pollution: exposure of road users and populations in Metropolitan Kuwait	n							0											1																		1
alaazi2015	Therapeutic landscapes of home: Exploring Indigenous peoples' experiences of a Housing First intervention in Winnipeg	y	1	1					0
alcock2015	What accounts for 'England's green and pleasant land'? A panel data analysis of mental health and land cover types in rural England	n							0																1					1								1
alexopoulos2014	A model for streamlining psychotherapy in the RDoC era: the example of 'Engage'	y		1					0
alimohammadi2018	Effect of Chronic Noise Exposure on Aggressive Behavior of Automotive Industry Workers	y	1						0
almendra2019	Short-term impacts of air temperature on hospitalizations for mental disorders in Lisbon	n							0														1															1
aln2020	Patterns of sociocognitive stratification and perinatal risk in the child brain	n							0																							1
aloufi2019	SCHIZOPHRENIA PRESENTATION AND MANAGEMENT	n							0
altu2020	Air pollution is associated with depressive symptoms in elderly women with cognitive impairment	n							0																							1											1
alvarez2017a	Impact of commuting exposure to traffic-related air pollution on cognitive development in children walking to school	n							0																							1
amano2018	The importance of green spaces to public health: a multi-continental analysis	y	1						0
ammerman2018	Using Exploratory Data Mining to Identify Important Correlates of Nonsuicidal Self-Injury Frequency	y		1					0
an2020	Mental health of urban residents in the developed cities of the Yangtze River Delta in China: Measurement with the mental composite scale from the WHOQOL-BREF	y		1					0
anderson2013	Methods to Calculate the Heat Index as an Exposure Metric in Environmental Health Research	y	1						0
andreucci2019	Designing Urban Green Blue Infrastructure for Mental Health and Elderly Wellbeing	n							0																1	1												1
andrews2020	Supporting early career researchers: insights from interdisciplinary marine scientists	y		1					0
annerstedt2012	Green qualities in the neighbourhood and mental health - results from a longitudinal cohort study in Southern Sweden	n							0																1													1
anon2013	Behavioral Health, United States, 2012	y		1					0
anon2015	Guiding development of pilot projects to drive quality improvement	y		1					0
anon2018	Focus on climate change and mental health	y			1				0
anon2018a	Pollution linked to cognitive decline	y				1			0
shrestha2019	Summary of the General Discussion on "Early Life Exposure to Air Pollution, Cognitive Development, and Labor Market Outcome"	n							0															1								1
aschengrau2016	Long-term Neurotoxic Effects of Early-life Exposure to?ßTetrachloroethylene-contaminated Drinking Water	n							0																								1					1									1
asmus2020	Rio Birth Cohort Study on Environmental Exposure and Childhood Development - PIPA Project	y	1						0
asnakew2019	Prevalence of post-traumatic stress disorder and associated factors among Koshe landslide survivors, Addis Ababa, Ethiopia: a community-based, cross-sectional study	n							0							1																															1
astell2019	Association of Urban Green Space With Mental Health and General Health Among Adults in Australia	n							0																1													1
astete2010	[Comunicable diseases, mental health and exposure to environmental pollutants in population living near Las Bambas mining project before exploitation phase, Peru 2006]	y							1	language																								1				1					1			1
aston2014	An ecological model of mental health promotion for school communities: adolescent views about mental health promotion in secondary schools in the UK	y		1					0
asugeni2015	Mental health issues from rising sea level in a remote coastal region of the Solomon Islands: current and future	n							0			1																										1
austin2018	Drought-related stress among farmers: findings from the Australian Rural Mental Health Study	n							0						1																							1
austin2018a	Long-Term Implications Of A Short-Term Policy: Redacting Substance Abuse Data	y		1					0
ayeb2020	When we were children we had dreams, then we came to Dhaka to survive': urban stories connecting loss of wellbeing, displacement and (im)mobility	y		1					0
ayeb2020a	Trapped in the prison of the mind: Notions of climate-induced (im)mobility decision-making and wellbeing from an urban informal settlement in Bangladesh	n							0			1																										1
ayer2019	Behavioral Health of Gulf Coast Residents 6 Years After the Deepwater Horizon Oil Spill: The Role of Trauma History	n							0																												1	1					1			1
b2019	[Intensive psychiatric care of children and adolescents in their natural environment : Alternatives to inpatient treatment]	y		1					0
baer2015	Assessing Mindfulness in Multiple Contexts: a Comment on Christopher, Woodrich, and Tiernan (2014)	y		1					0
bai2020	Pollution characteristics, sources and health risk assessment of polycyclic aromatic hydrocarbons in PM2.5 in an office building in northern areas, China	y	1						0
bains2019	Improving Health Outcomes and Serving Wider Society: The Potential Role of Understanding and Cultivating Prosocial Purpose Within Health Psychology Research and Practice to Address Climate Change and Social Isolation and Loneliness	y		1					0
baker2018	Identifying the connection between Roman conceptions of 'Pure Air' and physical and mental health in Pompeian gardens (c.150 BC-AD 79): a multi-sensory approach to ancient medicine	y							1	historic
baklien2016	When everyday life becomes a storm on the horizon: families' experiences of good mental health while hiking in nature	n							0																1													1
ballb2013	Second-hand smoke in mental healthcare settings: time to implement total smoke-free bans?	y		1					0
ballb2015	Association of second-hand smoke exposure at home with psychological distress in the Spanish adult population	y		1					0
balseviciene2013	Do Green Spaces Matter? The Associations Between Parenting Stress, Child Mental Health Problems And Green Spaces	n							0																1													1
bandyopadhyay2016	Neurological Disorders from Ambient (Urban) Air Pollution Emphasizing UFPM and PM2.5	n							0																							1
banjari2018	Forestalling the Epidemics of Parkinson's Disease Through Plant-Based Remedies	y		1					0
barger2020	Tree Canopy Coverage Predicts Lower Conduct Problem Severity in Children with ASD	n							0																1
barker2017	From stability to norm transformation: lessons about resilience, for development, from ecology	y		1					0
barreau2017	Physical, Mental, and Financial Impacts From Drought in Two California Counties, 2015	n							0						1																							1
barrett2016	Mindful Climate Action: Health and Environmental Co-Benefits from Mindfulness-Based Behavioral Training	n							0			1																										1
barrig2017	User profiles of an electronic mental health tool for ecological momentary assessment: MEmind	y		1					0
barry2016	Federal Parity In The Evolving Mental Health And Addiction Care Landscape	y		1					0
basaga2016	Neurodevelopmental Deceleration by Urban Fine Particles from Different Emission Sources: A Longitudinal Observational Study	n							0																							1
bauer2012	Burden, rewards, and coping--the ups and downs of caregivers of people with mental illness	y		1					0
beck2014	Is tool-making knowledge robust over time and across problems?	y		1					0
becker2010	Wilderness Therapy: Ethical Considerations for Mental Health Professionals	y		1					0
becker2019a	"It's When the Trees Blossom": Explanatory Beliefs, Stigma, and Mental Illness in the Context of HIV in Botswana	y		1					0
beecher2016	Sunshine on my shoulders: Weather, pollution, and emotional distress	n							0												1													1				1
beidas2014	A Healthy New World: Emergent Opportunities for Clinical Psychologists in the Patient Protection and Affordable Care Act	y		1					0
belleville2019	Post-Traumatic Stress among Evacuees from the 2016 Fort McMurray Wildfires: Exploration of Psychological and Sleep Symptoms Three Months after the Evacuation	n							0															1																							1
ben2016	Mobile Health for All: Public-Private Partnerships Can Create a New Mental Health Landscape	y		1					0
bennett2010	Non-heat related impacts of climate change on working populations	n							0			1																										1
bennett2013	Growing Pains: An Eriksonian View of the Arc of Presenting Concerns in an LGBT Community Mental Health Center	y		1					0
berg2016a	Visiting green space is associated with mental health and vitality: A cross-sectional study in four european cities	n							0																1													1
berk2014	Pop, heavy metal and the blues: secondary analysis of persistent organic pollutants (POP), heavy metals and depressive symptoms in the NHANES National Epidemiological Survey	n							0																									1									1
berle2015	Families of returned defence force personnel: a changing landscape of challenges	y		1					0
berman2014	Predicting depression outcome in mental health treatment: a recursive partitioning analysis	y		1					0
bernardini2019	Air pollutants and daily number of admissions to psychiatric emergency services: evidence for detrimental mental health effects of ozone	n							0																							1						1
berry2010a	Mind, body, spirit: co-benefits for mental health from climate change adaptation and caring for country in remote Aboriginal Australian communities	y		1					0
berry2015	Worrying about climate change: is it responsible to promote public debate?	n							0			1																										1
besch2020	Emergency psychiatric management of borderline personality disorder: Towards an articulation of modalities for personalised integrative care	y		1					0
bettmann2017	Changes in Late Adolescents and Young Adults' Attachment, Separation, and Mental Health During Wilderness Therapy	n							0																1													1
beutel2016	Noise Annoyance Is Associated with Depression and Anxiety in the General Population- The Contribution of Aircraft Noise	n							0											1																							1			1
beutel2020	Noise annoyance predicts symptoms of depression, anxiety and sleep disturbance 5 years later. Findings from the Gutenberg Health Study	n							0											1																							1			1
bevilacqua2020	Understanding Associations Between Hurricane Harvey Exposure and Mental Health Symptoms Among Greater Houston-Area Residents	n							0										1																								1			1	1
bezold2018	The Association Between Natural Environments and Depressive Symptoms in Adolescents Living in the United States	n							0																1	1																	1
bhat2018	Psychological distress among college students of coastal district of Karnataka: A community-based cross-sectional survey	y		1					0
bhatia2012	Policy and regulatory action can reduce harms from particulate pollution: comment on "exposure to particulate air pollution and cognitive decline in older women"	n							0																							1
bielinis2019	The Effects of a Forest Therapy Programme on Mental Hospital Patients with Affective and Psychotic Disorders	n							0																				1											1
birch2020	Nature doesn't judge you - how urban nature supports young people's mental health and wellbeing in a diverse UK city	n							0																1													1
birgitta2018	Treatment of depression and/or anxiety - outcomes of a randomised controlled trial of the tree theme method?½ versus regular occupational therapy	y		1					0
birken2019	A Photovoice study of user experiences of an occupational therapy department within an acute inpatient mental health setting	y		1					0
bistricky2019	Surviving the storm: Avoidant coping, helping behavior, resilience and affective symptoms around a major hurricane-flood	n							0										1																								1				1
bitta2019	Priority mental, neurological and substance use disorders in rural Kenya: Traditional health practitioners' and primary health care workers' perspectives	y		1					0
bjorling2020	Exploring Teens as Robot Operators, Users and Witnesses in the Wild	y		1					0
blank2012	FEDERAL HEALTH POLICY: MENTAL HEALTH PRIORITIES IN A CHALLENGING CONGRESSIONAL LANDSCAPE	y		1					0
block2018	Early Child Development, Residential Crowding, and Commute Time in 8 US States, 2010-2017	y		1					0
block2019	The role of the natural environment in disaster recovery: "We live here because we love the bush"	n							0															1														1					1				1
boillot2019	High serum ferritin levels are associated with a reduced periodontium in women with anorexia nervosa	y		1					0
bolten2019	Ghosts in the Nursery 2.0	y	1	1					0
bond2010	Comparing decalage and development with cognitive developmental tests	y		1					0
bonsall2015	Bipolar disorder dynamics: affective instabilities, relaxation oscillations and noise	y		1					0
bortolotti2015	Costs and benefits of realism and optimism	y		1					0
borzekowski2019	Constancy (the New Media "C") and Future Generations	y		1					0
bos2013	Subclinical effects of aerobic training in urban environment	n							0																							1
boucekine2015	Exploring the response shift effect on the quality of life of patients with schizophrenia: an application of the random forest method	y		1					0
boucher2019	Recovery from severe mental illness in Quebec: The role of culture and place	y		1					0
bouras2018	From Community to Meta-Community Mental Health Care	y		1					0
bourque2014	Climate change: the next challenge for public mental health?	n							0			1																										1
bowen2016	Wilderness adventure therapy effects on the mental health of youth participants	n							0																1													1
bowles2015	Climate Change and Health Adaptation: Consequences for Indigenous Physical and Mental Health	y		1					0
br2017	Maternal depression research: socioeconomic analysis and density-equalizing mapping of the global research architecture	y		1					0
brahnam2014	Two Innovative Healthcare Technologies at the Intersection of Serious Games, Alternative Realities, and Play Therapy	y		1					0
bratman2015	Nature experience reduces rumination and subgenual prefrontal cortex activation	n							0																1													1
breslin2017	Promoting mental health awareness in sport clubs	y		1					0
brew2016	The health and wellbeing of Australian farmers: a longitudinal cohort study	y		1					0
bronzaft2010	Abating New York City transit noise: a matter of will, not way	y	1						0
brown2014	Walks4Work: assessing the role of the natural environment in a workplace physical activity intervention	n							0																1													1
brown2017	Emodiversity: Robust Predictor of Outcomes or Statistical Artifact?	y		1					0
brown2018	Health Disparities in the Relationship of Neighborhood Greenness to Mental Health Outcomes in 249,405 U.S. Medicare Beneficiaries	n							0																1																		1
brown2019a	Adverse childhood experiences and their relationship to complex health profiles among child welfare-involved children: A classification and regression tree analysis	y		1					0
brown2019b	After the Fort McMurray wildfire there are significant increases in mental health symptoms in grade 7-12 students compared to controls	n							0															1														1
brown2019c	Correction to: After the Fort McMurray wildfire there are significant increases in mental health symptoms in grade 7-12 students compared to controls	n							0
brown2019d	Significant PTSD and Other Mental Health Effects Present 18 Months After the Fort Mcmurray Wildfire: Findings From 3,070 Grades 7-12 Students	n							0															1														1					1			1	1	1
brown2020a	Psychological Care Augmented by Telemedicine after a Polar Bear Encounter at an Arctic Research Station: A Case Report	y		1					0
browning2018	Do Income, Race and Ethnicity, and Sprawl Influence the Greenspace-Human Health Link in City-Level Analyses? Findings from 496 Cities in the United States	n							0																1													1
brubaker2011	Climate change and health effects in Northwest Alaska	n							0			1																										1
brumby2011	Farming fit? Dispelling the Australian agrarian myth	y		1					0
brunst2019	Myo-inositol mediates the effects of traffic-related air pollution on generalized anxiety symptoms at age 12ÈÃ╗years	n							0																							1														1
bryant2013	Beyond discourses of drought: The micro-politics of the wine industry and farmer distress	y	1						0
bryant2014	Economies, ethics and emotions: Farmer distress within the moral economy of agribusiness	y	1						0
bryant2015	The fallen hero: masculinity, shame and farmer suicide in Australia	y	1						0
buckley2018	Aging Adventure Athletes Assess Achievements and Alter Aspirations to Maintain Self-Esteem	y		1					0
buckley2020	Nature tourism and mental health: parks, happiness, and causation	n							0																1													1
bunce2016	Vulnerability and adaptive capacity of Inuit women to climate change: a case study from Iqaluit, Nunavut	y	1						0
bunz2017	[Climate change - physical and mental consequences]	y							1	language
burley2018	Green infrastructure and violence: Do new street trees mitigate violent crime?	y	1						0
burns2015	Poverty, inequality and a political economy of mental health	y		1					0
burns2018	Plasticity of the epigenome during early-life stress	y		1					0
burt2010	Are there shared environmental influences on attention-deficit/hyperactivity disorder? Reply to Wood, Buitelaar, Rijsdijk, Asherson, and Kuntsi [corrected] (2010)	y		1					0
busch2010	Changes in guideline-recommended medication possession after implementing Kendra's law in New York	y		1					0
buttke2012	Mental health needs assessment after the Gulf Coast oil spill-Alabama and Mississippi, 2010	n							0																												1	1					1			1
buttke2012a	Community Assessment for Public Health Emergency Response (CASPER) One Year Following the Gulf Coast Oil Spill: Alabama and Mississippi, 2011	n							0																												1	1					1			1
caamano2011	Respiratory and mental health effects of wildfires: an ecological study in Galician municipalities (north-west Spain)	n							0															1																						1
cairney2018	Exercise is medicine: critical considerations in the qualitative research landscape INTRODUCTION	y		1					0
came2020	The whole and inclusive university: a critical review of health promoting universities from Aotearoa New Zealand	y		1					0
campbell2019	A Predictive Analytic Approach to Planning Combat Stress Control Operations	y		1					0
cao2018	A Case Study of Air Cleaner by the Intelligent Interaction and Emotion	y	1						0
capra2013	The origins of health and disease: the influence of maternal diseases and lifestyle during gestation	y		1					0
caramanica2015	Posttraumatic Stress Disorder after Hurricane Sandy among Persons Exposed to the 9/11 Disaster	n							0										1																												1
carlyle2019	Walking in rhythm with Deleuze and a dog inside the classroom: being and becoming well and happy together	y		1					0
carnie2011	In their own words: young people's mental health in drought-affected rural and remote NSW	n							0						1																							1
carr2020	Bereavement in the Time of Coronavirus: Unprecedented Challenges Demand Novel Interventions	y		1					0
casanova2020	Investigating Predictors of Cognitive Decline Using Machine Learning	y		1					0
castelpietra2017	Working draft: Classifications of interventions in mental health care. An expert review	y		1					0
castledine2011	Sleep and insomnia	y		1					0
caye2019	A risk calculator to predict adult attention-deficit/hyperactivity disorder: generation and external validation in three birth cohorts and one clinical sample	y		1					0
cerin2020	International Mind, Activities and Urban Places (iMAP) study: methods of a cohort study on environmental and lifestyle influences on brain and cognitive health	n							0																1							1
cerletti2020	The independent association of source-specific transportation noise exposure, noise annoyance and noise sensitivity with health-related quality of life	n							0											1																		1
chadwin2017	Evacuation of Pets During Disasters: A Public Health Intervention to Increase Resilience	y		1					0
chan2018	Association between Ambient Temperatures and Mental Disorder Hospitalizations in a Subtropical City: A Time-Series Study of Hong Kong Special Administrative Region	n							0														1															1
chang2014	Increased risk of dementia in patients exposed to nitrogen dioxide and carbon monoxide: a population-based retrospective cohort study	n							0																							1
chang2017	Landscape Preference In Taiwanese School-Aged Children	y							1	conference
charlton2014	Factors associated with low fitness in adolescents--a mixed methods study	y		1					0
chase2017	"In our community, a friend is a psychologist": An ethnographic study of informal care in two Bhutanese refugee communities	n							0
chen2012	[Traumatic response experiences: one year after Typhoon Morakot]	y							1	language
chen2013	Migration, environmental hazards, and health outcomes in China	n							0																									1				1
chen2018a	Early life exposure to particulate matter air pollution (PM(1), PM(2.5) and PM(10)) and autism in Shanghai, China: A case-control study	n							0																							1
chen2018b	Psychopathological Symptoms under Smog: The Role of Emotion Regulation	n							0																							1						1
chen2019a	Is long-term exposure to air pollution associated with poor sleep quality in rural China?	y	1						0
chen2020	COVID-19 and telepsychiatry: Early outpatient experiences and implications for the future	y		1					0
chen2020a	The neighborhood effect of exposure to blue space on elderly individuals' mental health: A case study in Guangzhou, China	n							0																	1												1
chen2020c	Impact of Perception of Green Space for Health Promotion on Willingness to Use Parks and Actual Use among Young Urban Residents	y	1						0
cheng2018	An algorithm for managing adults who refuse medical treatment in New South Wales	y		1					0
cheong2020	Early environment and long-term outcomes of preterm infants	y		1					0
cherry2015	Long-term psychological outcomes in older adults after disaster: relationships to religiosity and social support	n							0		1								1																		1	1									1
cherry2017	Optimism and Hope After Multiple Disasters: Relationships to Health-Related Quality of Life	n							0		1								1																		1	1
cherry2017a	Effects of the Fort McMurray wildfires on the health of evacuated workers: follow-up of 2 cohorts	n							0															1														1
choi2016	Psychological Vulnerability of Residents of Communities Affected by the Hebei Spirit Oil Spill	n							0																												1	1					1			1	1
choi2018	Perceptions of forest contact and its therapeutic role in university students in South Korea	n							0																				1									1
chowdhury2016	Stigma of tiger attack: Study of tiger-widows from Sundarban Delta, India	y		1					0
chowdhury2016a	Ecopsychosocial Aspects of Human-Tiger Conflict: An Ethnographic Study of Tiger Widows of Sundarban Delta, India	y		1					0
christian2013	CLIMATE VARIABILITY ON CAREGIVER'S MENTAL HEALTH AND CHILD NUTRITIONAL STATUS	y							1	presentation
chung2014	12-month outcomes of community engagement versus technical assistance to implement depression collaborative care: a partnered, cluster, randomized, comparative effectiveness trial	y		1					0
cianconi2015	Psychopathology in postmodern societies	y		1					0
cleary2018	Association of Low-Level Ozone with Cognitive Decline in Older Adults	n							0																							1
cleaveland2014	Ecology and conservation: contributions to One Health	y	1	1					0
cole2015	Researching wellbeing in a woodland: participant and researcher occupational engagement	n							0
cole2016a	Occupational engagement in a woodland: belonging and wellbeing for mental health	y							1	presentation															1
coles2010	Three kinds of proactive risk analyses for health care	y		1					0
coll2019	A logic model development for an adolescent based intervention to improve benefits from Therapeutic Residential Care (TRC)	y		1					0
collier2020	Explanatory variables for women's increased risk for mental health problems in Vietnam	y		1					0
collins2015	The core competencies for mental, neurological, and substance use disorder care in sub-Saharan Africa	y		1					0
collins2016	Lost landscapes of healing: the decline of therapeutic mental health landscapes	n							0																1													1
collins2018	Experimentally-enhanced perceptions of meaning confer resilience to the interpersonal adversity implicated in suicide risk	y		1					0
combs2016	A Multilevel Model to Examine Adolescent Outcomes in Outdoor Behavioral Healthcare: The Parent Perspective	n							0																1													1
connerton2019	Building Community Resilience to Mitigate Mental Health Effects of Climate Change	n							0		1																											1
connolly2014	The development of counselling psychology in Ireland	y		1					0
conrad2017	Does trauma event type matter in the assessment of traumatic load?	y		1					0
cooper2019	Environmental associated emotional distress and the dangers of climate change for pastoralist mental health	n							0						1
cooper2020	APPLE-Tree (Active Prevention in People at risk of dementia: Lifestyle, bEhaviour change and Technology to REducE cognitive and functional decline) programme: Protocol	y		1					0
coovadia2016	Adolescence: The age of Proteus	y		1					0
cope2013	Does time heal all wounds? Community attachment, natural resource employment, and health impacts in the wake of the BP Deepwater Horizon disaster	n							0																												1	1
cortinovis2018	Assessing Nature-Based Recreation to Support Urban Green Infrastructure Planning in Trento (Italy)	y	1						0
costello2019	'A lot better than medicine' - Self-organised ocean swimming groups as facilitators for healthy ageing	n							0																	1
craig2014	WHAT IS THE CURRENT SITUATION? HOW DID WE GET HERE? WHAT DO WE THINK OF THE EVOLVING LANDSCAPE IN MENTAL HEALTH?	y		1					0
crawford2012	The role of docosahexaenoic and the marine food web as determinants of evolution and hominid brain development: the challenge for human sustainability	y		1					0
creviston2018	Get on Board: Realizing Full Partnerships in Health Care	y		1					0
crombie2011	Environmental noise exposure, early biological risk and mental health in nine to ten year old children: a cross-sectional field study	n							0											1																		1
cunsolo2018	Ecological grief as a mental health response to climate change-related loss	n							0			1
curran2018	Conceptualizing and Managing Medical Emergencies Where No Formal Paramedical System Exists: Perspectives from a Remote Indigenous Community in Canada	y	1	1					0
da2017	Subjectivity in a context of environmental change: opening new dialogues in mental health research	n							0			1
dadvand2012	Green space, health inequality and pregnancy	y	1						0
dadvand2015	Green spaces and cognitive development in primary schoolchildren	n							0																1
dadvand2016	Green spaces and General Health: Roles of mental health status, social support, and physical activity	n							0																1													1
dadvand2017	Lifelong Residential Exposure to Green Space and Attention: A Population-based Prospective Study	n							0																1
dadvand2019	Use of green spaces, self-satisfaction and social contacts in adolescents: A population-based CASPIAN-V study	n							0																1
dales2016	Does Mental Health Status Influence Susceptibility to the Physiologic Effects of Air Pollution? A Population Based Study of Canadian Children	y	1						0
daley2013	A small-scale randomized controlled trial of the self-help version of the New Forest Parent Training Programme for children with ADHD symptoms	y		1					0
dancause2015	Prenatal stress due to a natural disaster predicts adiposity in childhood: the Iowa Flood Study	y	1						0
darabi2018	Rapid Vulnerability Assessment of Lavizan Urban Forest Park	y	1						0
davidson2010	Forced Migration, Social Exclusion and Poverty: Introduction	y	1	1					0
davis2016	Aging and Hearing Health: The Life-course Approach	y	1	1					0
de2015	Why Should Cognitive Developmental Psychology Remember that Individuals Are Different?	y		1					0
de2017	General practitioners' experiences and perceptions of mild moderate depression management and factors influencing effective service delivery in rural Australian communities: a qualitative study	y		1					0
de2017a	Work-related Mental Health Surveillance in Brazil: characteristics, difficulties, and challenges	y		1					0
de2018a	On the Importance of Intraindividual Variability in Cognitive Development	y		1					0
de2019	Green and blue spaces and physical functioning in older adults: Longitudinal analyses of the Whitehall II study	y	1						0
dean2010	Mental health impact for adolescents living with prolonged drought	n							0						1
deighton2018	Longitudinal pathways between mental health difficulties and academic performance during middle childhood and early adolescence	y		1					0
del2016a	Refining Mild-to-Moderate Alzheimer Disease Screening: A Tool for Clinicians	y		1					0
dellaringa2018	Rio's Mountainous Region ("Regi?·o Serrana") 2011 Landslides: Impact on Public Mental Health System	n							0							1																						1
demarest2013	Development of a Spatial and Temporal Agent-Based Model for Studying Water and Health Relationships: The Case Study of Two Villages in Limpopo, South Africa	y	1						0
demler2020	Assessing the Current Anti psychotics Landscape	y		1					0
dempsey2018	Coastal blue space and depression in older adults	n							0																	1																	1
deng2017	Occupational hazard evaluation model underground coal mine based on unascertained measurement theory	y		1					0
di2020	Perception of climate change, loss of social capital and mental health in two groups of migrants from African countries	n							0			1																										1
diaz2011	The legacy of the Gulf oil spill: analyzing acute public health effects and predicting chronic ones in Louisiana	y	1						0
diaz2020	Short-term effects of traffic noise on suicides and emergency hospital admissions due to anxiety and depression in Madrid (Spain)	n							0											1			1									1														1
dick2018	Mapping Risk from Genes to Behavior: The Enduring and Evolving Influence of Irving Gottesman's Endophenotype Concept	y		1					0
ding2016	The Importance of Humidity in the Relationship between Heat and Population Mental Health: Evidence from Australia	n							0														1															1
dionne2018	Factors Associated with Family Caregivers' Confidence in Future Surrogate Decision Making for Persons with Cancer	y		1					0
dipnall2016	Into the Bowels of Depression: Unravelling Medical Symptoms Associated with Depression by Applying Machine-Learning Techniques to a Community Based Population Sample	y		1					0
divandari2016	THE ROLE OF STRUCTURAL ELEMENTS OF PERSIAN GARDEN IN MENTAL HEALTH	n							0																1
d'monte2015	Data Mining Approach for Diagnose of Anxiety Disorder	y		1					0
dodd2018	Lived experience of a record wildfire season in the Northwest Territories, Canada	n							0															1
dolling2017	Stress recovery in forest or handicraft environments - An intervention study	n							0																				1
donald2015	Consumer perspectives on the therapeutic value of a psychiatric environment	y		1					0
donnelly2016	Environmental Influences on Elite Sport Athletes Well Being: From Gold, Silver, and Bronze to Blue Green and Gold	n							0																1	1
donovan2018	SenseCare: Using Automatic Emotional Analysis to Provide Effective Tools for Supporting Wellbeing	y		1					0
downey2016	Being Human in Cities Phenotypic Bias from Urban Niche Construction	y		1					0
dreger2015	Environmental noise and incident mental health problems: A prospective cohort study among school children in Germany	n							0											1																		1
drescher2014	The Deepwater Horizon Oil Spill and the Mississippi Gulf Coast: Mental health in the context of a technological disaster	n							0																												1						1			1
dreyer2018	Beyond Exposure to Outdoor Nature: Exploration of the Benefits of a Green Building's Indoor Environment on Wellbeing	n							0																1
dsouza2020	Aggregated COVID-19 suicide incidences in India: Fear of COVID-19 infection is the prominent causative factor	y		1					0
du2018	Extracting psychiatric stressors for suicide from social media using deep learning	y		1					0
duarte2015	[Biodiversity and depressive symptoms in Mexican adults: Exploration of beneficial environmental effects]	y							1	language
duarte2015a	FOCUSING ON SELF OR OTHERS HAS DIFFERENT CONSEQUENCES FOR PSYCHOLOGICAL WELL-BEING: A LONGITUDINAL STUDY OF THE EFFECTS OF DISTINCT INTERPERSONAL GOALS	y		1					0
dunleavy2020	Prevalence of psychological distress and its association with perceived indoor environmental quality and workplace factors in under and aboveground workplaces	y		1					0
duvall2014	Enhancing the well-being of veterans using extended group-based nature recreation experiences	n							0																1
dykxhoorn2017	Early life predictors of adolescent suicidal thoughts and adverse outcomes in two population-based cohort studies	y		1					0
dzhambov2017	Residential road traffic noise and general mental health in youth: The role of noise annoyance, neighborhood restorative quality, physical activity, and social cohesion as potential mediators	n							0											1																		1
dzhambov2017a	Residential greenspace modifies the effect of road traffic noise exposure on mental health in youth	n							0											1																		1
dzhambov2018	Urban residential greenspace and mental health in youth: Different approaches to testing multiple pathways yield different conclusions	n							0																1													1
dzhambov2018a	Multiple pathways link urban green- and bluespace to mental health in young adults	n							0																1													1
dzhambov2018b	Pathways linking residential noise and air pollution to mental ill-health in young adults	n							0											1												1						1
dzhambov2018c	Residential greenspace might modify the effect of road traffic noise exposure on general mental health in students	n							0											1					1													1
dzhambov2018d	Residential green and blue space associated with better mental health: a pilot follow-up study in university students	n							0											1					1													1
dzhambov2019	Residential greenspace is associated with mental health via intertwined capacity-building and capacity-restoring pathways	n							0																1													1								1
ebesutani2012	A transportable assessment protocol for prescribing youth psychosocial treatments in real-world settings: reducing assessment burden via self-report scales	y		1					0
eckenwiler2018	Displacement and solidarity: An ethic of place-making	y	1	1					0
edwards2010	Prenatal exposure to airborne polycyclic aromatic hydrocarbons and children's intelligence at 5 years of age in a prospective cohort study in Poland	n							0																							1
ehrlich2020	What happens when peer support workers are introduced as members of community-based clinical mental health service delivery teams: a qualitative study	y		1					0
eibich2016	Associations between Neighborhood Characteristics, Well-Being and Health Vary over the Life Course	y		1					0
eibl2017	The State of Opioid Agonist Therapy in Canada 20 Years after Federal Oversight	y		1					0
eisenman2015	An Ecosystems and Vulnerable Populations Perspective on Solastalgia and Psychological Distress After a Wildfire	n							0															1														1
ejlskov2018	Assessing the relative importance of correlates of loneliness in later life. Gaining insight using recursive partitioning	y		1					0
eklund2016	The forest as a classroom: preparing for mental health practice	y	1						0
ell2016	Integrating Biopsychosocial Intervention Research in a Changing Health Care Landscape	y		1					0
ellis2017	Climate change threats to family farmers' sense of place and mental wellbeing: A case study from the Western Australian Wheatbelt	n							0			1																										1
elovanio2020	General Health Questionnaire (GHQ-12), Beck Depression Inventory (BDI-6), and Mental Health Index (MHI-5): psychometric and predictive properties in a Finnish population-based sample	y		1					0
engemann2018	Childhood exposure to green space - A novel risk-decreasing mechanism for schizophrenia?	n							0																1																								1
engemann2019	Residential green space in childhood is associated with lower risk of psychiatric disorders from adolescence into adulthood	n							0																1													1
engemann2020	Associations between growing up in natural environments and subsequent psychiatric disorders in Denmark	n							0																1															1
engemann2020a	Natural surroundings in childhood are associated with lower schizophrenia rates	n							0																1																								1
engemann2020b	Association Between Childhood Green Space, Genetic Liability, and the Incidence of Schizophrenia	n							0																1																								1
english2020	Making Sense of Sensor Data: How Local Environmental Conditions Add Value to Social Science Research	n							0																							1						1
enssle2020	Urban green spaces for the social interaction, health and well-being of older people-An integrated view of urban ecosystem services and socio-environmental justice	y	1						0
eskelinen2017	THE STUDENTS' LEARNING EXPERIENCES IN A MULTIPROFESSIONAL LIVING LAB	y	1	1					0
espinel2019	Forecast: Increasing Mental Health Consequences From Atlantic Hurricanes Throughout the 21st Century	n							0										1																			1
ettekal2019	Comparing alternative methods of measuring cumulative risk based on multiple risk indicators: Are there differential effects on children's externalizing problems?	y		1					0
evans2014	Childhood Poverty, Cumulative Risk Exposure, and Mental Health in Emerging Adults	y		1					0
evans2019	Projected Behavioral Impacts of Global Climate Change	y	1						0
evered2016	The role of the urban landscape in restoring mental health in Sheffield, UK: service user perspectives	n							0																1													1
every2015	CLIMATE CHANGE AND MENTAL HEALTH	y				1			0
eysel2012	Effects of noise in primary schools on health facets in German teachers	y		1					0
eze2020	Incidence of depression in relation to transportation noise exposure and noise annoyance in the SAPALDIA study	n							0											1																							1
falkenberg2020	Ocean Acidification and Human Health	y	1						0
fallon2013	Opportunities for prevention and intervention with young children: lessons from the Canadian incidence study of reported child abuse and neglect	y	1	1					0
fan2020	Analyzing the genes and pathways related to major depressive disorder via a systems biology approach	y		1					0
farnham2017	The quantified self during travel: mapping health in a prospective cohort of travellers	y		1					0
farshi2018	Social Context of Iranian Parents with Adolescents: A Qualitative Content Analysis	y	1						0
fearon2020	Opening up while locking down: how an Irish independent sector mental health service is responding to the COVID-19 crisis?	y		1					0
felix2015	THE ROLE OF SOCIAL SUPPORT ON MENTAL HEALTH AFTER MULTIPLE WILDFIRE DISASTERS	n							0															1														1
felix2015a	Family functioning and posttraumatic growth among parents and youth following wildfire disasters	n							0															1														1
fennell2016	Watching the bank balance build up then blow away and the rain clouds do the same: A thematic analysis of South Australian farmers' sources of stress during drought	n							0						1																										1
fernandes2014	Occupational risks and illness among mental health workers	y		1					0
fernandes2020a	Demands for psychosocial support from communities vulnerable to natural disasters	y							1	language
fernee2019	Therapy the Natural Way: A Realist Exploration of the Wilderness Therapy Treatment Process in Adolescent Mental Health Care in Norway	n							0																1													1
fernee2020	Emerging stories of self: long-term outcomes of wilderness therapy in Norway	n							0																1													1
fillmore2011	After the waters receded: a qualitative study of university officials' disaster experiences during the Great Iowa Flood of 2008	y	1						0
findley2014	Emergency preparedness and intervention: social work education needs in Israel	y	1						0
finsterwalder2017	Conceptual underpinnings for transformative research in a service ecosystems context to resolve social issues - framework foundations and extensions	y		1					0
firdaus2017	Built Environment and Health Outcomes: Identification of Contextual Risk Factors for Mental Well-being of Older Adults	y		1					0
fisher2015	An Emancipatory Approach to Practice and Qualitative Inquiry in Mental Health: Finding 'Voice' in Charles Taylor's Ethics of Identity	y		1					0
fisk2020	Effect of 4 weeks daily wild blueberry supplementation on symptoms of depression in adolescents	y		1					0
fistein2012	Mental Health in the Wake of Flooding in Pakistan: An Ongoing Humanitarian Crisis (vol 22, pg 66, 2012)	y							1	duplicate
flores2020	Disparities in Health Effects and Access to Health Care Among Houston Area Residents After Hurricane Harvey	n							0										1																			1
fonseca2018	Comparisons of schizotypal traits across 12 countries: Results from the International Consortium for Schizotypy Research	y		1					0
fordham2013	Camp promotes mental health and fun	y		1					0
forns2012	Prenatal exposure to organochlorine compounds and neuropsychological development up to two years of life	n							0																									1
forns2017	Longitudinal association between air pollution exposure at school and cognitive development in school children over a period of 3.5 years	n							0																							1
foulkes2019	A bad night's sleep on campus: an interview study of first-year university students with poor sleep quality	y		1					0
fox2015	Intergenerational neural mediators of early-life anxious temperament	y						1	0
fox2018	Affect toward the self and self-injury stimuli as potential risk factors for nonsuicidal self-injury	y		1					0
francisco2017	Ventilation, indoor air quality, and health in homes undergoing weatherization	y		1					0
frantzidis2010	On the classification of emotional biosignals evoked while viewing affective pictures: an integrated data-mining-based approach for healthcare applications	y		1					0
freeman2012	My garden is an expression of me: Exploring householders' relationships with their gardens	n							0																1													1
freina2014	LEARNING TO COPE WITH STREET DANGERS: AN INTERACTIVE ENVIRONMENT FOR THE INTELLECTUALLY IMPAIRED	y	1	1					0
freire2010	Association of traffic-related air pollution with cognitive development in children	n							0																							1
frewen2020	Proof of Concept of an Eclectic, Integrative Therapeutic Approach to Mental Health and Well-Being Through Virtual Reality Technology	n							0																1
friel2014	The impact of drought on the association between food security and mental health in a nationally representative Australian sample	n							0						1																							1
frueh2012	Introduction to the Special Issue on Psychopathological Posttraumatic Reactions	y		1					0
fuentes2016	Making Communication Frequency Tangible: How Green Is My Tree?	y		1					0
fuentes2020	Impacts of Environmental Changes on Well-Being in Indigenous Communities in Eastern Canada	n							0			1																										1
fullagar2018	Rethinking women's experiences of depression and recovery as emplacement: Spatiality, care and gender relations in rural Australia	y		1					0
furuyashiki2019	A comparative study of the physiological and psychological effects of forest bathing (Shinrin-yoku) on working age people with and without depressive tendencies	n							0																				1									1					1
g2018	Impact of air pollution on depression and suicide	n							0																							1										1	1
gabrielsen2019	The effectiveness of wilderness therapy as mental health treatment for adolescents in Norway: a mixed methods evaluation	n							0																1													1
ganesh2018	Climate Change, Public Health, and Policy: A California Case Study	n							0			1																										1
ganguli2020	Aging, Diabetes, Obesity, and Cognitive Decline: A Population-Based Study	y		1					0
gao2011	Forensic Psychiatry in the People's Republic of China	y		1					0
gao2019	Exploring Psychophysiological Restoration and Individual Preference in the Different Environments Based on Virtual Reality	n							0																1
garc2019	A decision support system for assessing management interventions in a mental health ecosystem: The case of Bizkaia (Basque Country, Spain)	y		1					0
gardner2015	Collective narrative practice in forensic mental health	y		1					0
garrett2019	Coastal proximity and mental health among urban adults in England: The moderating effect of household income	n							0																	1												1
gascon2018	Long-term exposure to residential green and blue spaces and anxiety and depression in adults: A cross-sectional study	n							0																1	1																	1			1
gaspar2015	Prenatal DDT and DDE exposure and child IQ in the CHAMACOS cohort	n							0																									1
generaal2019	Not urbanization level but socioeconomic, physical and social neighbourhood characteristics are associated with presence and severity of depressive and anxiety disorders	n							0											1					1	1						1											1			1
generaal2019a	Neighbourhood characteristics and prevalence and severity of depression: pooled analysis of eight Dutch cohort studies	n							0											1					1	1						1											1			1
gibbs2013	Beyond Bushfires: Community, Resilience and Recovery - a longitudinal mixed method study of the medium to long term impacts of bushfires on mental health and social connectedness	n							0															1														1
gibson2019	Distressing encounters in the context of climate change: Idioms of distress, determinants, and responses to distress in Tuvalu	n							0			1																													1
gibson2020	The mental health impacts of climate change: Findings from a Pacific Island atoll nation	n							0			1																										1
gidlow2016	Research note: Natural environments and prescribing in England	n							0																1																		1
giovanis2018	Health status, mental health and air quality: evidence from pensioners in Europe	y	1						0
glover2011	Mental health law in motion--confronting new challenges in the modern psychiatric landscape	y		1					0
goebel2011	REALITY CHECK: FREUD GONE WILDE	y	1	1					0
goh2019	Thriving in an expanding service landscape: Experiences of occupational therapists working in generic mental health roles within non-government organisations in Australia	y	1	1					0
gonz2010	Pollution by psychoactive pharmaceuticals in the Rivers of Madrid metropolitan area (Spain)	y	1						0
gonzalez2018	Prenatal exposure to environmental pollutants and child development trajectories through 7 years	n							0																							1
goodkind2017	Challenges and Innovations in a Community-Based Participatory Randomized Controlled Trial	y		1					0
goodwill2018	An exploratory study of stress and coping among Black college men	y		1					0
gospodarevskaya2012	Cost-utility analysis of different treatments for post-traumatic stress disorder in sexually abused children	y		1					0
gould2015	Behavioral health in the gulf coast region following the Deepwater Horizon oil spill: findings from two federal surveys	n							0																												1	1										1
grabow2018	Mindfulness and Climate Change Action: A Feasibility Study	n							0			1
grace2018	Community Volunteer Support for Families With Young Children: Protocol for the Volunteer Family Connect Randomized Controlled Trial	y		1					0
grace2019	Effectiveness of the Volunteer Family Connect Program in Reducing Isolation of Vulnerable Families and Supporting Their Parenting: Randomized Controlled Trial With Intention-To-Treat Analysis of Primary Outcome Variables	y		1					0
grant2012	Polycyclic aromatic hydrocarbons, particulate air pollution, and cognitive decline	n							0																							1
grauer2020	Climate change: The thief of childhood	n							0			1																										1
green2019	Risks to human health from ammunition-derived lead in Europe	y	1	1					0
greenhill2015	Outcomes of Australian rural clinical schools: a decade of success building the rural medical workforce through the education and training continuum	y	1	1					0
grellier2017	BlueHealth: a study programme protocol for mapping and quantifying the potential benefits to public health and well-being from Europe's blue spaces	n							0																	1												1
griffin2018	Predictors of anxiety among sexual minority individuals in the Southern US	y		1					0
grigorash2018	Predicting Caller Type From a Mental Health and Well-Being Helpline: Analysis of Call Log Data	y		1					0
grigsby2015	Sleep insufficiency and the natural environment: Results from the US Behavioral Risk Factor Surveillance System survey	y	1						0
grineski2016	School-based exposure to hazardous air pollutants and grade point average: A multi-level study	n							0																							1
gruebner2011	A spatial epidemiological analysis of self-rated mental health in the slums of Dhaka	y		1					0
gruebner2012	Mental health in the slums of Dhaka - a geoepidemiological study	n							0																1													1
gu2020a	Air pollution risks human mental health: an implication of two-stages least squares estimation of interaction effects	n							0																							1						1
guerrero2020	An update to "Care for the seafarers: A review of mental health in Austronesia," with specific recommendation to address climate change	y							1	duplicate
guiney2012	Farming suicides during the Victorian drought: 2001-2007	n							0						1																											1
guirguis2014	The Impact of Recent Heat Waves on Human Health in California	n							0														1															1
gunn2012	Farmers' stress and coping in a time of drought	n							0						1																							1
guo2017	Emotion-Aware Smart Tips for Healthy and Happy Sleep	y		1					0
gupta2018	Impact of volunteering on cognitive decline of the elderly	y		1					0
guxens2014	Air pollution during pregnancy and childhood cognitive and psychomotor development: six European birth cohorts	n							0																							1
h2020a	The Wildman Programme. A Nature-Based Rehabilitation Programme Enhancing Quality of Life for Men on Long-Term Sick Leave: Study Protocol for a Matched Controlled Study In Denmark	n							0																1													1
ha2017	Geographic Variation in Mentally Unhealthy Days: Air Pollution and Altitude Perspectives	n							0																							1						1
ha2019	A spatial epidemiology case study of mentally unhealthy days (MUDs): air pollution, community resilience, and sunlight perspectives	n							0												1											1						1
hackett2017	Evaluating the Effectiveness and Social Return on Investment of the Pine River Institute: An Intensive Mental Health and Addiction Program for Young People	y		1					0
haddara2019	Anxious anticipation prolongs emotional interference for rapid visual detection	y		1					0
hadjipavlou2015	Psychotherapy in Contemporary Psychiatric Practice	y		1					0
haffejee2015	African Refugee Youths' Stories of Surviving Trauma and Transition in U.S. Public Schools	y		1					0
haggett2015	A History of Male Psychological Disorders in Britain, 1945ÈÃ¶1980	y		1					0
hahad2020	[Impact of environmental risk factors such as noise and air pollution on mental health: What do we know?]	y							1	language
haines2020	Testing Suicide Risk Prediction Algorithms Using Phone Measurements With Patients in Acute Mental Health Settings: Feasibility Study	y		1					0
hakim2018	Rumi's cognitive therapy approach to health and disease	y		1					0
hall2016	Spatial Shift in the Utilization of Mental Health Services After Hurricane Sandy Among New York City Residents Enrolled in Medicaid	n							0										1																			1
hall2019a	Perspectives of adolescent and young adults on poverty-related stressors: a qualitative study in Ghana, Malawi and Tanzania	y		1					0
hall2020	Climate Change Impacts on Health in Remote Indigenous Communities in Australia	n							0			1																										1
halmer2015	Health Policy Considerations in Treating Mental and Behavioral Health Emergencies in the United States	y		1					0
hammersen2016	Environmental Noise Annoyance and Mental Health in Adults: Findings from the Cross-Sectional German Health Update (GEDA) Study 2012	n							0											1																		1
han2018	Study on the Landscape Design of Urban Aged Community Based on Humanistic Care	y		1					0
han2018a	Estimation of the National Burden of Disease and Vulnerable Population Associated with Natural Disasters in Korea: Heavy Precipitation and Typhoon	n							0												1																	1
han2020	Effects of nature-based solutions (NBS) on eco-friendly hotel guests' mental health perceptions, satisfaction, switching barriers, and revisit intentions	n							0																1													1
hanigan2012	Suicide and drought in New South Wales, Australia, 1970-2007	n							0						1																											1
hanigan2018	Drought and Distress in Southeastern Australia	n							0						1																										1
hanrahan2019	Gender and water insecurity in a subarctic Indigenous community	n							0					1																								1
haroz2020	Reaching Those at Highest Risk for Suicide: Development of a Model Using Machine Learning Methods for use With Native American Communities	y		1					0
harper2015	Climate-sensitive health priorities in Nunatsiavut, Canada	n							0			1																										1
harper2019	Client perspectives on wilderness therapy as a component of adolescent residential treatment for problematic substance use and mental health issues	n							0																1													1										1
harris2015	Prenatal and Childhood Traffic-Related Pollution Exposure and Childhood Cognition in the Project Viva Cohort (Massachusetts, USA)	n							0																							1
hart2011	Improving the mental health of rural New South Wales communities facing drought and other adversities	n							0						1																							1
hashoul2016	A Longitudinal Study of Emotional Distress Intolerance and Psychopathology Following Exposure to a Potentially Traumatic Event in a Community Sample	n							0															1														1
hassan2018	Effects of Walking in Bamboo Forest and City Environments on Brainwave Activity in Young Adults	n							0																				1
hasson2016	The trees and the forest: mixed methods in the assessment of recovery based interventions' processes and outcomes in mental health	y		1					0
haswell2016	Health concerns associated with unconventional gas mining in rural Australia	y	1						0
hayashi2010	Citizen Education Programs at Awaji Landscape Planning & Horticulture Academy for the Improvement of the Landscape and the Environment	n							0
hayashi2020	Development of Classification Models for the Prediction of Alzheimer's Disease Utilizing Circulating Sex Hormone Ratios	y		1					0
hays2019	Assessing Cognition Outside of the Clinic: Smartphones and Sensors for Cognitive Assessment Across Diverse Psychiatric Disorders	y		1					0
hayward2020	Mental health nursing in bushfire-affected communities: An autoethnographic insight	n							0															1														1
he2019	Residential noise exposure and the longitudinal risk of hospitalization for depression after pregnancy: Postpartum and beyond	n							0											1																							1
he2020	The Association Between PM(2.5) and Depression in China	n							0																							1											1
heaney2016	Climate-driven migration: an exploratory case study of Maasai health perceptions and help-seeking behaviors	n							0			1																										1
heaslip2020	Locating oneself in the past to influence the present: Impacts of Neolithic landscapes on mental health well-being	y		1					0
helbich2018	Natural environments and suicide mortality in the Netherlands: a cross-sectional, ecological study	n							0																1																	1
helbich2019	Dynamic Urban Environmental Exposures on Depression and Suicide (NEEDS) in the Netherlands: a protocol for a cross-sectional smartphone tracking study and a longitudinal population register study	n							0											1					1	1						1											1
helbich2020	Greenery exposure and suicide mortality later in life: A longitudinal register-based case-control study	n							0																1																	1
helbich2020a	Outdoor light at night, air pollution and depressive symptoms: A cross-sectional study in the Netherlands	n							0																							1											1
helm2018	Differentiating environmental concern in the context of psychological adaption to climate change	n							0			1																													1		1
hemingway2019	An Exploration of the Mechanism of Action of an Equine-Assisted Intervention	y		1					0
henckes2019	Schizophrenia Infrastructures: Local and Global Dynamics of Transformation in Psychiatric Diagnosis-Making in the Twentieth and Twenty-First Centuries	y		1					0
hendrikx2018	Comparing the Health of Populations: Methods to Evaluate and Tailor Population Management Initiatives in the Netherlands	y		1					0
herrick2020	The optics of noncommunicable diseases: from lifestyle to environmental toxicity	y	1						0
hess2014	Reducing Mental Health Disparities Through Transformative Learning: A Social Change Model With Refugees and Students	y		1					0
heyman2010	Screening for health risks: A second editorial	y		1					0
higuchi2017	An Effect of Noise on Mental Health Indicator using Voice	y		1					0
hildebrandt2019	Indoor Air Quality and Health in Newly Constructed Apartments in Developing Countries: A Case Study of Surabaya, Indonesia	y		1					0
hill2014	Noise sensitivity and diminished health: testing moderators and mediators of the relationship	n							0											1																							1			1
hipp2011	Effect of environmental conditions on perceived psychological restorativeness of coastal parks	n							0														1			1									1
ho2018	Looking back and moving forward: The experiences of canadian parents raising an adolescent with autism spectrum disorder	y		1					0
hooyberg2020	General health and residential proximity to the coast in Belgium: Results from a cross-sectional health survey	n							0																	1						1						1
horgan2016	Behavioral Health Services in the Changing Landscape of Private Health Plans	y		1					0
hossain2010	Value of mental health first aid training of advisory and extension agents in supporting farmers in rural Queensland	y		1					0
howat2011	Why sustainable population growth is a key to climate change and public health equity	y	1						0
hsieh2015	Ecosystem Functions Connecting Contributions from Ecosystem Services to Human Wellbeing in a Mangrove System in Northern Taiwan	n							0																		1											1
hu2015a	Research on Urban Light Pollution and Its Prevention	y	1						0
hubbard2018	Enhancing Dignity for Older Inpatients: The Photograph-Next-to-the-Bed Study	y		1					0
hughes2020	In a mental-health care setting, can nature conservation and health priorities align?	n							0																1													1
hungerford2011	Changing landscapes: A partnership between mental health nurses and the Psychotherapy and Counselling Federation of Australia Inc. (PACFA)	y		1					0
hunter2012	Local Public Health System Response to the Tsunami Threat in Coastal California following the T?ýhoku Earthquake	y	1						0
husain2016	Predicting Generalized Anxiety Disorder Among Women Using Random Forest Approach	y		1					0
hyshka2017	Perceived unmet need and barriers to care amongst street-involved people who use illicit drugs	y		1					0
ieichalopoulos2016	Intensive hog farming operations, health risks, and quality of life of nearby residents in east Mediterranean	n							0																							1						1
iemmi2019	Sustainable development for global mental health: a typology and systematic evidence mapping of external actors in low-income and middle-income countries	y		1					0
igarashi2015	Effect of stimulation by foliage plant display images on prefrontal cortex activity: a comparison with stimulation using actual foliage plants	y	1						0
imbimbo2020	Discontinued disease-modifying therapies for Alzheimer's disease: status and future perspectives	y		1					0
ishiki2016	Changes in Cognitive Functions in the Elderly Living in Temporary Housing after the Great East Japan Earthquake	n							0								1	1
ising2012	The validity of the 16-item version of the Prodromal Questionnaire (PQ-16) to screen for ultra high risk of developing psychosis in the general help-seeking population	y		1					0
iskander2018	Public Health Emergency Response Lessons Learned by Rapid Deployment Force 3, 2006-2016	y	1						0
jack2013	Caregiving experiences of families of persons with serious mental health problems in the Niger Delta region of Nigeria	y		1					0
jacobs2018a	Funding approaches for mental health services: Is there still a role for clustering?	y		1					0
jacobsen2020	Predictors of attrition in a longitudinal population-based study of aging	y		1					0
jadhav2012	The Elephant Vanishes: impact of human-elephant conflict on people's wellbeing	y		1					0
james2016	Exposure to Greenness and Mortality in a Nationwide Prospective Cohort Study of Women	y	1						0
james2020	Integrating mental health and disaster preparedness in intervention: a randomized controlled trial with earthquake and flood-affected communities in Haiti	n							0		1																											1
janssen2017	Galantamine	y		1					0
jarvis2020	Different types of urban natural environments influence various dimensions of self-reported health	n							0																1													1
jedrychowski2011	Cognitive function of 6-year old children exposed to mold-contaminated homes in early postnatal period. Prospective birth cohort study in Poland	n							0																							1
jenkins2015	Attention deficit hyperactivity disorder symptom self-report in adults in Kenya and its associated risk factors, an analysis from a household survey in a demographic surveillance site	y		1					0
jensen2018	Neighbour and traffic noise annoyance: a nationwide study of associated mental health and perceived stress	n							0											1																		1			1
jensen2019	Neighbour noise annoyance is associated with various mental and physical health symptoms: results from a nationwide study among individuals living in multi-storey housing	n							0											1																		1
jernigan2018	Introduction	n							0
jeurissen2016	[Towards a sustainable, cost-effective mental health care; a policy perspective]	y							1	language
ji2019	Residential greenness and mortality in oldest-old women and men in China: a longitudinal cohort study	y	1						0
jiang2020a	Connections-between Daily Greenness Exposure and Health Outcomes	n							0																1													1
jiao2017	The Cost-Effectiveness of Lowering Permissible Noise Levels Around U.S. Airports	y	1						0
joensuu2010	Psychosocial work environment and hospital admissions due to mental disorders: a 15-year prospective study of industrial employees	y	1						0
johnson2017	Health, well-being and quality of life of community members displaced after an industrial disaster in Trinidad	n							0																												1	1
johnson2018	Exposure to neighborhood green space and sleep: evidence from the Survey of the Health of Wisconsin	y	1						0
johnson2020a	Coal-mine fire-related fine particulate matter and medical-service utilization in Australia: a time-series analysis from the Hazelwood Health Study	n							0																							1						1
jones2012	The impact of climate change on obsessive compulsive checking concerns	n							0			1																																	1
jones2017	To a God Unknown: Drought, Climate, and Race in the West	y	1	1					0
jorcano2019	Prenatal and postnatal exposure to air pollution and emotional and aggressive symptoms in children from 8 European birth cohorts	n							0																							1											1			1
joseph2017	The Evolving Practice of Psychiatry in the Era of Integrated Care	y		1					0
jung2019	The Impact of Particulate Matter on Outdoor Activity and Mental Health: A Matching Approach	n							0																							1						1
kageyama2016	Exposure-response relationship of wind turbine noise with self-reported symptoms of sleep and health problems: A nationwide socioacoustic survey in Japan	n							0											1																		1
kalogeropoulos2018	Psychologists and Psychotherapists' Practices of Psychotherapy in Quebec: What Differences Exist?	y		1					0
kamimura2017	Perceived Environmental Pollution and Its Impact on Health in China, Japan, and South Korea	n							0																							1						1
kanalas2014	Resilience in children originated from families in which parents migrate due to labor conditions	y		1					0
kang2019	Comments on Early Life Exposure to Air Pollution,Cognitive Development, and Labor Market Outcome	n							0
kannuri2018	Generating toxic landscapes: impact on well-being of cotton farmers in Telangana, India	n							0																									1				1
kanwar2015	Mental Illness and Stigma: Has Psychiatry Done more Harm than Good?	y		1					0
kaplan2015	A randomised trial of nutrient supplements to minimise psychological stress after a natural disaster	y		1					0
karafin2018	Predictive factors of daily opioid use and quality of life in adults with sickle cell disease	y		1					0
karasch2020	Identification of risk factors for involuntary psychiatric hospitalization: using environmental socioeconomic data and methods of machine learning to improve prediction	y		1					0
karaye2020	Self-Rated Mental and Physical Health of U.S. Gulf Coast Residents	n							0										1																			1
karceski2020	Air pollution and brain health	n							0
kardan2015	Neighborhood greenspace and health in a large urban center	n							0																1													1
kasthurirathne2018	Assessing the capacity of social determinants of health data to augment predictive models identifying patients in need of wraparound social services	y		1					0
kasthurirathne2019	Identification of Patients in Need of Advanced Care for Depression Using Data Extracted From a Statewide Health Information Exchange: A Machine Learning Approach	y		1					0
kaur2019	A healthcare monitoring system using random forest and internet of things (IoT)	y		1					0
kawa2012	A brief historicity of the Diagnostic and Statistical Manual of Mental Disorders: issues and implications for the future of psychiatric canon and practice	y		1					0
keeler2019	Social-ecological and technological factors moderate the value of urban nature	y	1						0
kelly2011	Determinants of mental health and well-being within rural and remote communities	y		1					0
kelsey2019	A primer on investigating the role of the microbiome in brain and cognitive development	y		1					0
kessler2014	How well can post-traumatic stress disorder be predicted from pre-trauma risk factors? An exploratory study in the WHO World Mental Health Surveys	y		1					0
kessler2017	Predicting suicides after outpatient mental health visits in the Army Study to Assess Risk and Resilience in Servicemembers (Army STARRS)	y		1					0
khan2020	Can walking groups help with social isolation: a qualitative study	y	1						0
kibria2019	Does higher access ensure greater wellbeing? - In the perspective of forest ecosystem services of the Sundarbans mangrove forest, Bangladesh	n							0																		1
kim2010	Evaluating the Relative Health of Residents in Newly Built Apartment Houses according to the Presence of Indoor Plants	y							1	language
kim2011	Evaluation of Indoor Air Quality and Health Related Parameters in Office Buildings with or without Indoor Plants	y							1	language
kim2013	Burden of disease attributable to the Hebei Spirit oil spill in Taean, Korea	n							0																												1	1
kim2013a	Deficient biological motion perception in schizophrenia: results from a motion noise paradigm	y		1					0
kim2017	An integrated psychological response score of the occupants based on their activities and the indoor environmental quality condition changes	y	1	1					0
kim2019	Gender Difference in the Effects of Outdoor Air Pollution on Cognitive Function Among Elderly in Korea	n							0																							1
king2015	A Different Kettle of Fish: Mental health strategies for Australian fishers, and farmers	y		1					0
king2016	Needs Assessment of Hurricane Katrina Evacuees Residing Temporarily in Dallas	n							0										1																			1
kingdom2011	Psychosocial risk factors for work-related stress in Her Majesty's Coastguard	y		1					0
kirsch2013	Satisfaction with the humanitarian response to the 2010 Pakistan floods: a call for increased accountability to beneficiaries	y	1						0
kishore2011	Myths, beliefs and perceptions about mental disorders and health-seeking behavior in Delhi, India	y		1					0
kleisiaris2014	Health care practices in ancient Greece: The Hippocratic ideal	y							1	historic
klompmaker2019	Associations of combined exposures to surrounding green, air pollution and traffic noise on mental health	n							0																1													1
knopf2013	Treating mental illness and addiction in Salt Lake County	y		1					0
koehlmoos2011	Global health: chronic diseases and other emergent issues in global health	y	1						0
kohen2015	Housing and health among Inuit children	y		1					0
kohli2020	Evolving Connectionist Models to Capture Population Variability across Language Development: Modeling Children's Past Tense Formation	y		1					0
koka2020	Ptosis Correction	y	1						0
kolvir2020	Monitoring and analysis of the effects of atmospheric temperature and heat extreme of the environment on human health in Central Iran, located in southwest Asia	y	1						0
komorowska2018	Forest School - a forest playground as a remedy for nature-deficit disorder in children	y	1						0
kondo2020	Health impact assessment of Philadelphia's 2025 tree canopy cover goals	y	1						0
kouvonen2010	Sense of coherence and psychiatric morbidity: a 19-year register-based prospective study	y		1					0
krasny2014	Campus sustainability and natural area stewardship: student involvement in adaptive comanagement	y	1						0
kratzer2019	[Inpatient Treatment of Complex PTSD Following Childhood Abuse: Effectiveness and Predictors of Treatment Outcome]	y							1	language
krause2015	Making theWorkWe Do More Relevant: Using Religion and Health as a Template	y	1	1					0
kreinin2014	Evacuation of a mental health center during a forest fire in Israel	y	1						0
krishnaswamy2012	The 2004 tsunami in Penang, Malaysia: early mental health intervention	n							0									1																				1
kroon2011	TREE: a Dutch multi-centre (cluster) randomized trial of a recovery program of/for persons with severe mental illness	y		1					0
kruger2017	Toxic trauma: Household water quality experiences predict posttraumatic stress disorder symptoms during the Flint, Michigan, water crisis	n							0																											1											1
kruger2017a	Poor tap water quality experiences and poor sleep quality during the Flint, Michigan Municipal Water Crisis	n							0																											1		1
kulick2020	Long-term exposure to air pollution and trajectories of cognitive decline among older adults	n							0																							1
kulick2019	Long-term Exposure to Ambient Air Pollution and Trajectories of Cognitive Decline among Older Adults in Northern Manhattan	n							0																							1
kulick2020a	Long-term exposure to ambient air pollution, APOE-?┴4 status, and cognitive decline in a cohort of older adults in northern Manhattan	n							0																							1
kulkarni2014	Psychiatric Co-morbidities among Patients with Select Non-communicable Diseases in a Coastal City of South India	y	1						0
kumar2019	The nexus between air pollution, green infrastructure and human health	n							0																1							1						1
kumar2020	Dealing with Corona virus anxiety and OCD	y		1					0
kurti2016	Characterizing the intersection of Co-occurring risk factors for illicit drug abuse and dependence in a U.S. nationally representative sample	y		1					0
kyriklaki2016	Prenatal exposure to persistent organic pollutants in association with offspring neuropsychological development at 4years of age: The Rhea mother-child cohort, Crete, Greece	n							0																									1
labont2015	Globalization and the health of Canadians: 'Having a job is the most important thing'	y		1					0
lagonigro2018	Environmental noise inequity in the city of Barcelona	y	1						0
lai2017	Patterns of Caregiver Factors Predicting Participation in Trauma-Focused Cognitive Behavioral Therapy	y		1					0
laios2018	[Psychosomatic disorders in ancient Greek medicine]	y							1	language
laios2019	Drugs for mental illnesses in ancient greek medicine	y							1	historic
lambert2016	Understanding the Business Case for Telemental Health in Rural Communities	y		1					0
langabeer2020	County-level factors underlying opioid mortality in the United States	y		1					0
lapaige2011	THE EMERGENCE OF WEATHER-RELATED DISASTER PUBLIC HEALTH AND MENTAL HEALTH DISCIPLINE: WEB 2.0 AND WEB 3.0 CONTINUING MEDICAL EDUCATION IS REQUIRED	y		1					0
lapaige2011a	EECOHEALTH: ADAPTIVE TRANSFRONTIER ECOLEARNING FOR CLIMATE CHANGE-ORIENTED EHEALTH AND CLIMATE-SENSITIVE PSYCHOPATHOLOGY	y		1					0
lapaige2012	GLOBALIZATION AND KNOWLEDGE TRANSLATION SCIENCE IN MENTAL ECOHEALTH: NEW ACTORS, RENEWED PERSPECTIVES	y		1					0
larkin2019	Evaluating street view exposure measures of visible green space for health research	y	1						0
larson2018	Gray space and green space proximity associated with higher anxiety in youth with autism	n							0																1																					1
lattie2019	Technology and College Student Mental Health: Challenges and Opportunities	y		1					0
lattie2020	Designing Mental Health Technologies that Support the Social Ecosystem of College Students	y		1					0
lauwers2020	Urban environment and mental health: the NAMED project, protocol for a mixed-method study	n							0																1													1
lavadera2020	MAP Train My Brain: Meditation Combined with Aerobic Exercise Reduces Stress and Rumination While Enhancing Quality of Life in Medical Students	y		1					0
lavoie2020	Manitoba First Nation peoples' use of hospital-based mental health services: trends and solutions	y		1					0
le2013	Displacement, county social cohesion, and depression after a large-scale traumatic event	n							0										1																								1
leavey2010	The appreciation of the spiritual in mental illness: a qualitative study of beliefs among clergy in the UK	y		1					0
lee2011	Effect of forest bathing on physiological and psychological responses in young Japanese male subjects	n							0																				1									1
lee2012	Community Attachment and Negative Affective States in the Context of the BP Deepwater Horizon Disaster	y	1						0
lee2017a	The Cost-effectiveness of the Online MindSpot Clinic for the Treatment of Depression and Anxiety in Australia	y		1					0
lee2019	Association between dust storm occurrence and risk of suicide: Case-crossover analysis of the Korean national death database	n							0		1																															1
lee2019a	Healing experiences of middle-aged women through an urban forest therapy program	n							0																				1
lee2020	Environmental influence in the forested area toward human health: incorporating the ecological environment into art psychotherapy	n							0																				1									1
leenders2011	Work in progress: Creative Recovery to creative livelihoods	y		1					0
leiter2013	Organizational predictors and health consequences of changes in burnout: A 12-year cohort study	y		1					0
lengen2015	The effects of colours, shapes and boundaries of landscapes on perception, emotion and mentalising processes promoting health and well-being	y		1					0
leraas2018	Affect-based profiles of bulimia nervosa: The utility and validity of indicators assessed in the natural environment	y		1					0
lertxundi2015	Exposure to fine particle matter, nitrogen dioxide and benzene during pregnancy and cognitive and psychomotor developments in children at 15 months of age	n							0																							1
lertxundi2019	Prenatal exposure to PM(2.5) and NO(2) and sex-dependent infant cognitive and motor development	n							0																							1
lesch2019	Barriers to Healthcare Services and Supports for Signing Deaf Older Adults	y	1						0
lett2017	The Combined Influence of Air Pollution and Home Learning Environment on Early Cognitive Skills in Children	n							0																							1
levai2018	Resilience and Risk Factors in Children Originated from Families in which Parents Migrate due to Labor Conditions	y		1					0
levy2017	Climate Change and Collective Violence	y	1						0
lewis2014	Processes of vulnerability in England? Place, poverty and susceptibility	y	1	1					0
lewis2015	Impact of Coping Efficacy and Acculturation on Psychopathology in Adolescents Following a Wildfire	n							0															1																							1
li2020	Modeling Spatiotemporal Pattern of Depressive Symptoms Caused by COVID-19 Using Social Media Data Mining	y	1	1					0
liang2019	Distribution characteristics and health risk assessment of heavy metals and PAHs in the soils of green spaces in Shanghai, China	y	1	1					0
liao2019	Residential exposure to green space and early childhood neurodevelopment	n							0																1							1
lieber2017	Assessing the Mental Health Impact of the 2011 Great Japan Earthquake, Tsunami, and Radiation Disaster on Elementary and Middle School Children in the Fukushima Prefecture of Japan	y		1					0
liggins2013	Using autoethnography to reclaim the 'place of healing' in mental health care	y		1					0
lim2018	Negative impact of noise and noise sensitivity on mental health in childhood	n							0											1
lima2015	Lay perceptions of health and environmental inequalities and their associations to mental health	y	1	1					0
lin2016	What Happened to Our Environment and Mental Health as a Result of Hurricane Sandy?	n							0										1																			1
lin2017	Exposure to air pollution and tobacco smoking and their combined effects on depression in six low- and middle-income countries	n							0																							1											1
liu2014	Prenatal and postnatal lead exposure and cognitive development of infants followed over the first three years of life: a prospective birth study in the Pearl River Delta region, China	n							0																									1
liu2015a	The Impact of Health Education or Health of the Victims of the Earthquake in Disaster Area	n							0								1																					1
liu2017	Improving the Protection of Children Against Air Pollution Threats in Romania - The RokidAIR Project Approach and Future Perspectives	y	1						0
liu2018	Influence of Heat Waves on Daily Hospital Visits for Mental Illness in Jinan, China-A Case-Crossover Study	n							0														1															1
liu2019	Neighbourhood greenness and mental wellbeing in Guangzhou, China: What are the pathways?	n							0																1
liu2020a	The Influence of Left-Behind Experience on College Students' Mental Health: A Cross-Sectional Comparative Study	y		1					0
loder2020	Objective and Perceived Neighborhood Greenness of Students Differ in their Agreement in Home and Study Environments	n							0																1													1
long2019	Comments on Early Life Exposure to Air Pollution,Cognitive Development, and Labor Market Outcome	y				1			0
looi2019	Surviving the Heart of Darkness: reflections on the experience of psychiatrists working in public mental health services in Australia	y		1					0
lotfalian2014	OCCUPATIONAL STRESS IMPACT ON MENTAL HEALTH STATUS OF FOREST WORKERS	y		1					0
lovasi2014	Neighborhood Social Context and Individual Polycyclic Aromatic Hydrocarbon Exposures Associated with Child Cognitive Test Scores	n							0																							1
love2019	Twenty Years Of School-Based Health Care Growth And Expansion	y		1					0
lu2016	[Reflection on the Differences and Similarities of Mental Health Care in Virginia and Taiwan: Geography, History, Culture, and Nurse Practitioners]	y							1	language
lu2018	Mental health status, and suicidal thoughts and behaviors of migrant children in eastern coastal China in comparison to urban children: a cross-sectional survey	y							1	retracted
lu2020	Attributable risks associated with hospital outpatient visits for mental disorders due to air pollution: A multi-city study in China	n							0																							1						1
lu2020a	Who is susceptible to perceive higher smog-induced health risk? Comparative analysis between physical and mental health dimensions	n							0																										1			1
lu2020b	Retraction Note to: Mental health status, and suicidal thoughts and behaviors of migrant children in eastern coastal China in comparison to urban children: a cross-sectional survey	y							1	retraction note
lynch2017	Psychiatric Residential Treatment Centers for Children and Adolescents: Modeling Variation in Facility Definition Type	y		1					0
ma2013	A Study on Humanized Design of City Square by Environmental Psychology	y	1						0
ma2018a	A Multilevel Analysis of Perceived Noise Pollution, Geographic Contexts and Mental Health in Beijing	n							0											1																		1
ma2019	Bifidobacterium infantis M-63 improves mental health in victims with irritable bowel syndrome developed after a major flood disaster	y	1	1					0
ma2020	Assessing personal noise exposure and its relationship with mental health in Beijing based on individuals' space-time behavior	n							0											1																		1
macdonald2016	The primary school as a therapeutic community	y		1					0
macfarlane2015	Implications of participatory methods to address mental health needs associated with climate change: 'photovoice' in Nepal	y		1					0
mackerron2013	Happiness is greater in natural environments	n							0																					1
mackinnon2012	A family tree filled with mental illness: review: a lethal inheritance: a mother uncovers the science behind three generations of mental illness by victoria costello	y		1					0
maclean2016	Are natural disasters in early childhood associated with mental health and substance use disorders as an adult?	n							0		1																											1										1
macpherson2015	Caribbean Heat Threatens Health, Well-being and the Future of Humanity	n							0														1															1
maddox2019	Reorientation of the Rural Adversity Mental Health Program: the value of a program logic model	y	1						0
mahomed2020	Addressing the Problem of Severe Underinvestment in Mental Health and Well-Being from a Human Rights Perspective	y		1					0
mahoney2014	Home Environment, Brain Injury, & School Performance in LBW Survivors	y		1					0
maillard2011	[Key elements of the evolution of adolescent mental health policies]	y							1	language
maltsev2011	The role of ??-amyloid peptide in neurodegenerative diseases	y		1					0
mambrey2019	[Extreme weather events and their impact on the mental health of children and adolescents]	y							1	language
mancini2019	Quantifying wildlife watchers' preferences to investigate the overlap between recreational and conservation value of natural areas	y	1						0
manczak2020	Water contaminant levels interact with parenting environment to predict development of depressive symptoms in adolescents	n							0																											1							1
mannix2018	A Community Needs Assessment of Urban Utah American Indians and Alaska Natives	y		1					0
margariti2017	[Clinical guidelines for the management of schizophrenia:Aims and limitations (?Í)]	y							1	language
margariti2018	[Clinical guidelines for the management of schizophrenia (?Í?Í): Community service-level interventions and the role of Primary Care]	y							1	language
markevych2014	Access to urban green spaces and behavioural problems in children: Results from the GINIplus and LISAplus studies	n							0																1
markevych2018	Outdoor air pollution, greenspace, and incidence of ADHD: A semi-individual study	n							0																1							1
marquina2016	Postcolonial healing landscapes and mental health in a remote Indigenous community in subarctic Ontario, Canada	y		1					0
marshall2011	Pumps, aqueducts, and drought management: vascular physiology in vascular cognitive impairment	y		1					0
mason2018	Health Impacts of Extreme Weather Events: Exploring Protective Factors with a Capitals Framework	n							0			1																										1
mason2020	Mental Health and Weather Extremes in a Southeastern U.S. City: Exploring Group Differences by Race	n							0			1																										1
mathias2015	Under the banyan tree--exclusion and inclusion of people with mental disorders in rural North India	y		1					0
matise2018	A Working Model for the Integration of Spirituality in Counseling	y		1					0
matsubara2014	Prevalence and risk factors for depressive reaction among resident survivors after the tsunami following the Great East Japan Earthquake, March 11, 2011	n							0									1																									1
matsubara2016	Prevalence and Risk Factors for Post-Traumatic Stress Reaction Among Resident Survivors of the Tsunami That Followed the Great East Japan Earthquake, March 11, 2011	n							0									1																													1
matsubara2018	Inhalation of Japanese cedar (Cryptomeria japonica) wood odor causes psychological relaxation after monotonous work among female participants	y		1					0
matsuda2020	Mothering in the Context of Mental Disorder: Effect of Caregiving Load on Maternal Health in a Predominantly Hispanic Sample	y		1					0
matsumoto2014	[Mental health care systems and provisions in the immediate and acute phase of the Great East Japan Earthquake: situational and support activities in Miyagi Prefecture]	y							1	language
matsuoka2012	[The Great East Japan earthquake and mid- and long-term prospect for mental health and welfare in Miyagi Prefecture]	y							1	language
maughan2016	Primary-care-based social prescribing for mental health: an analysis of financial and environmental sustainability	y	1	1					0
maund2019	Wetlands for Wellbeing: Piloting a Nature-Based Health Intervention for the Management of Anxiety and Depression	n							0																1																1					1
mavoa2019	Natural neighbourhood environments and the emotional health of urban New Zealand adolescents	n							0																1																		1
maybery2020	A mixed-methods study of psychological distress following an environmental catastrophe: the case of the Hazelwood open-cut coalmine fire in Australia	n							0															1														1
mayner2010	Emergency department patient presentations during the 2009 heatwaves in Adelaide	n							0														1															1
mcallister2017	Into the Woods or a Stroll in the Park: How Virtual Contact with Nature Impacts Positive and Negative Affect	n							0																1
mcbride2019	Soft power and global health: the sustainable development goals (SDGs) era health agendas of the G7, G20 and BRICS	y		1					0
mccrone2013	The economic impact of early intervention in psychosis services for children and adolescents	y		1					0
mcdermott2019	Integrating Climate Change Into Nursing Curricula	y	1						0
mcelroy2010	Environmental health effects of concentrated animal feeding operations: implications for nurses	y	1						0
mcewan2019	A Smartphone App for Improving Mental Health through Connecting with Urban Nature	n							0																1													1
mcgorry2015	Early intervention in psychosis: obvious, effective, overdue	y		1					0
mcintyre2018	Characterizing, Assessing, and Treating Cognitive Dysfunction in Major Depressive Disorder	y		1					0
mciver2018	Healing Fears, Conquering Challenges: Narrative Outcomes From a Wilderness Therapy Program	n							0																1													1
mcneill2016	Development and preliminary validation of the Constructive and Unconstructive Worry Questionnaire: A measure of individual differences in constructive versus unconstructive worry	y		1					0
mcshane2018	LOVING AN UNFAMILIAR WORLD DEMENTIA, MENTAL ILLNESS, AND CLIMATE CHANGE	y	1	1					0
mcwhinney2016	Using CForest to Analyze Diffusion Tensor Imaging Data: A Study of White Matter Integrity in Healthy Aging	y		1					0
mei2020	Research on Evaluation Indexes and Weights of the Aging-Friendly Community Public Environment under the Community Home-Based Pension Model	n							0																1
meilianda2017	Assessment of post-tsunami disaster recovery of Banda Aceh city of Indonesia as window of opportunities for sustainable development	n							0									1																				1
michalopoulos2017	"Life at the River is a Living Hell:" a qualitative study of trauma, mental health, substance use and HIV risk behavior among female fish traders from the Kafue Flatlands in Zambia	y		1					0
michelozzi2014	[Climate changes, floods, and health consequences]	y							1	language
midouhas2019	Neighbourhood-level air pollution and greenspace and inflammation in adults	y	1						0
mierau2020	Assessing quality of life in psychosocial and mental health disorders in children: a comprehensive overview and appraisal of generic health related quality of life measures	y		1					0
miles2012	Neighborhood Urban Form, Social Environment, and Depression	n							0																1																		1
milligan2015	Place and wellbeing: shedding light on activity interventions for older men	y		1					0
mills2013	Inpatient suicide on mental health units in Veterans Affairs (VA) hospitals: avoiding environmental hazards	y		1					0
mills2015	The Psychiatrization of Poverty: Rethinking the Mental Health-Poverty Nexus	y		1					0
mills2019	Stumbling Along, Walking on Eggshells, and Vicious Circles: What Happens While Families Wait for Youth Substance Use Treatment	y		1					0
milner2014	Household food insecurity associated with child cognitive development in a rural Kenyan community on Lake Victoria	y		1					0
min2017	Parks and green areas and the risk for depression and suicidal indicators	n							0																1																	1	1
min2018	Long-term exposure to air pollution and the risk of suicide death: A population-based cohort study	n							0																							1										1
min2018a	Night noise exposure and risk of death by suicide in adults living in metropolitan areas	n							0											1																						1
min2018b	Outdoor light at night and the prevalence of depressive symptoms and suicidal behaviors: A cross-sectional study in a nationally representative sample of Korean adults	y		1					0
min2019	Effect of apparent temperature on daily emergency admissions for mental and behavioral disorders in Yancheng, China: a time-series study	n							0														1															1
mindell2011	Synergies between low-carbon and healthy transport policies	y	1	1					0
minden2011	Waiting for what? An inquiry into the fundamental questions of how to fix adolescent mental health care	y		1					0
minh2020	A Scientometric Study on Depression among University Students in East Asia: Research and System Insufficiencies?	y		1					0
mitchell2013	Is physical activity in natural environments better for mental health than physical activity in other environments?	n							0																1													1
mmako2019	Sowing social inclusion for marginalised residents of a social housing development through a community garden	y	1						0
mmako2020	Green spaces, dementia and a meaningful life in the community: A mixed studies review	n							0																1
moberg2019	Guided Self-Help Works: Randomized Waitlist Controlled Trial of Pacifica, a Mobile App Integrating Cognitive Behavioral Therapy and Mindfulness for Stress, Anxiety, and Depression	y		1					0
mohammad2017	Measuring HRQoL By Comparing the Perception of Air Quality Among Residents in Selangor	n							0																							1						1
molina2019	Effects of Cardiorespiratory Exercise on Cognition in Older Women Exposed to Air Pollution	n							0																							1
monsour2012	Visions for the 20th International Epidemiological Association's World Congress of Epidemiology (WCE 2014)	y		1					0
moosavi2019	Mental Health Effects in Primary Care Patients 18 Months After a Major Wildfire in Fort McMurray: Risk Increased by Social Demographic Issues, Clinical Antecedents, and Degree of Fire Exposure	n							0															1																			1			1	1
morales2017	Acute Mental Discomfort Associated with Suicide Behavior in a Clinical Sample of Patients with Affective Disorders: Ascertaining Critical Variables Using Artificial Intelligence Tools	y		1					0
moreira2020	Psychometric properties of the Portuguese version of the cognitive emotion regulation questionnaire-kids version (CERQ-kids) among a sample of children and adolescents exposed to wildfires	n							0															1														1
morris2013	Psychological responses and resilience of people and communities impacted by the deepwater horizon oil spill	n							0																												1						1			1
mortimer2010	Mental health response to acute stress following wilderness disaster	y		1					0
motreff2013	Increase in psychotropic drug deliveries after the Xynthia storm, France, 2010	n							0												1																			1
moulin2019	A possible role for pollutants in mental disorders via gut microbiota	y			1				0
mueller2019	The role of the physical environment in adolescent mental health	n							0																1							1						1
muhammad2018	"I think that's all a lieÈÃ¬I think It's genocide": Applying a Critical Race Praxis to Youth Perceptions of Flint Water Contamination	y	1						0
mullins2019	Temperature and mental health: Evidence from the spectrum of mental health outcomes	n							0														1															1				1
mumm2017	Exploring urban health in Cape Town, South Africa: an interdisciplinary analysis of secondary data	y		1					0
mundt2011	[Karl Wilmanns' theoretical contributions and his clinical practice. What does it mean for contemporary psychiatry?]	y							1	1
munroe2012	Exposure to open-fire cooking and cognitive performance in children	n							0																							1
murawiec2013	Different facets of schizophrenia illustrated by the analysis of the homes of three patients diagnosed with schizophrenia	y		1					0
murphy2019	Erosion of Meaning in Life: African Asylum Seekers' Experiences of Seeking Asylum in Ireland	y		1					0
murugananthan2017	Educational Data Mining Life Cycle Model for Student Mental Healthcare and Education in Malaysia and India	y		1					0
mutz2016	Mental health benefits of outdoor adventures: Results from two pilot studies	n							0																1
myers2016a	Recovery stories: An anthropological exploration of moral agency in stories of mental health recovery	y		1					0
naal2020	Guidelines for primary health care-based telemental health in a low-to middle-income country: the case of Lebanon	y		1					0
nakao2016	Validation of the Mongolian version of the SF-36v2 questionnaire for health status assessment of Mongolian adults	y		1					0
nakao2018	The Impact of Air Pollution, Including Asian Sand Dust, on Respiratory Symptoms and Health-related Quality of Life in Outpatients With Chronic Respiratory Disease in Korea: A Panel Study	y	1						0
nararro2016	The Use of Virtual Reality to Facilitate Mindfulness Skills Training in Dialectical Behavioral Therapy for Borderline Personality Disorder: A Case Study	n							0																1																			1
nazilah2019	Validation of e-psychological instrument for flood victims version-II	n							0
nazimek2012	Auditory hallucinations: expectation-perception model	y		1					0
neff2018	The forest and the trees: Examining the association of self-compassion and its positive and negative components with psychological functioning	y		1					0
neldner2020	A cross-cultural investigation of young children's spontaneous invention of tool use behaviours	y		1					0
nell2015	The psychosocial well-being of a "forgotten" South African community: the case of Ndumo, KwaZulu-Natal	n							0																1													1
ner2018	Fuzzy Based Wellness Analyzer	y		1					0
nesi2020	The Impact of Social Media on Youth Mental Health: Challenges and Opportunities	y		1					0
newson2020	The Heterogeneity of Mental Health Assessment	y		1					0
nguyen2011	Acculturation and perceived mental health need among older Asian immigrants	y		1					0
ni2014	Data mining-based study on sub-mentally healthy state among residents in eight provinces and cities in China	y		1					0
nicholas2017	Issues for eHealth in Psychiatry: Results of an Expert Survey	y		1					0
nicholas2019	The Economics of Climate Change and the Intersection with Conflict, Violence, and Migration: Implications for the Nursing Profession	y	1						0
nicolay2016	A study of heat related illness preparedness in homeless veterans	y	1						0
nielsen2017	"Great powers and great responsibilities": A brief comment on "A brief mobile app reduces nonsuicidal and suicidal self-injury: Evidence from three randomized controlled trials" (Franklin et al., 2016)	y		1					0
nika2013	[Depression and anxiety in mothers of children who grow up in an area with industrial pollution]	y							1	language
nitschke2014	The link between noise perception and quality of life in South Australia	n							0											1
noguchi2012	[Outreach services to clients with severe mental illness in the Okayama Prefectural Mental Health and Welfare Center]	y							1	language
norra2012	Mental health burden and neuropsychiatric deficits of chronic arsenic exposure: First results of the Vietnamese field study	n							0																								1					1
norton2010	Into the Wilderness-A Case Study: The Psychodynamics of Adolescent Depression and the Need for a Holistic Intervention	n							0																1																		1
nosakhare2019	Probabilistic Latent Variable Modeling for Assessing Behavioral Influences on Well-Being	y		1					0
nugent2019	PTSD symptom profiles among Louisiana women affected by the 2010 Deepwater Horizon Oil Spill: A latent profile analysis	n							0																												1										1
nuvey2020	Poor mental health of livestock farmers in Africa: a mixed methods case study from Ghana	y		1					0
nuyts2019	Air pollution and self-perceived stress and mood: A one-year panel study of healthy elderly persons	n							0																							1
nyongesa2018	Neurocognitive and mental health outcomes and association with quality of life among adults living with HIV: a cross-sectional focus on a low-literacy population from coastal Kenya	y		1					0
obaseki2017	Domestic solid fuel combustion in an adult population in Nigeria: A cross sectional analysis of association with respiratory symptoms, quality of life and lung function	n							0																							1						1
obradovich2018	Empirical evidence of mental health risks posed by climate change	n							0														1															1
o'brien2011	Volunteering in nature as a way of enabling people to reintegrate into society	y	1						0
obrien2014	Drought as a mental health exposure	n							0						1																							1
obrien2018	Engaging with and Shaping Nature: A Nature-Based Intervention for Those with Mental Health and Behavioural Problems at the Westonbirt Arboretum in England	n							0																1
obrien2019	Carrying out Physical Activity as Part of the Active Forests Programme in England: What Encourages, Supports and Sustains Activity?-A Qualitative Study	n							0																				1
o'brien2019a	[Mental health and wellbeing: The contribution of trees and forests to diverse populations in Britain]	y							1	language
ojeda2016	Implementation of Age-Specific Services for Transition-Age Youths in California	y		1					0
oken2018	Predictors of Improvements in Mental Health From Mindfulness Meditation in Stressed Older Adults	y		1					0
okokon2018	Traffic noise, noise annoyance and psychotropic medication use	n							0											1																				1			1			1
oku2015	An Assessment of Mental Health Status of Undergraduate Medical Trainees in the University of Calabar, Nigeria: A Cross-Sectional Study	y		1					0
olesen2011	Community participation and mental health during retirement in community sample of Australians	y		1					0
oliver2010	LEARNING MODELS AND TEACHING PERSPECTIVES	y		1					0
oliver2012	Physiological and psychological illness symptoms at high altitude and their relationship with acute mountain sickness: a prospective cohort study	y		1					0
olson2014	The peripubertal gender-dysphoric child: puberty suppression and treatment paradigms	y		1					0
olszewska2018	What makes a landscape contemplative?	n							0																1
olszewska2018b	Window View and the Brain: Effects of Floor Level and Green Cover on the Alpha and Beta Rhythms in a Passive Exposure EEG Experiment	n							0																1
olszewska2020	Can Exposure to Certain Urban Green Spaces Trigger Frontal Alpha Asymmetry in the Brain?-Preliminary Findings from a Passive Task EEG Study	n							0																1
o'neill2016	Disaster averted: Community resilience in the face of a catastrophic flood	y	1						0
ord2020	[Mental health and environmental health. A prospective view. SESPAS Report 2020]	y							1	language
orozco2014	Epigenetic control and the circadian clock: linking metabolism to neuronal responses	y		1					0
orudjev2016	Computer - Based Visual Analysis of Ecology Influence on Human Mental Health	y	1						0
otakpor2015	A validational study of the Ironson-Woods Spirituality/Religiousness Index in Nigerian adolescents	y		1					0
otiende2017	Psychometric evaluation of the Major Depression Inventory among young people living in Coastal Kenya	y		1					0
otsuka2013	[Mental health activities following the Great East Japan Earthquake in the stricken coastal area of Iwate Prefecture]	y							1	language
oudin2016	Association between neighbourhood air pollution concentrations and dispensed medication for psychiatric disorders in a large longitudinal cohort of Swedish children and adolescents	n							0																							1								1
oudin2017	Is Long-term Exposure to Air Pollution Associated with Episodic Memory? A Longitudinal Study from Northern Sweden	n							0																							1
oudin2017a	Air Pollution and Dispensed Medications for Asthma, and Possible Effect Modifiers Related to Mental Health and Socio-Economy: A Longitudinal Cohort Study of Swedish Children and Adolescents	n							0																							1						1
ouliaris2020	Preventing prejudice by preserving the spirit of mental health legislation during the COVID-19 national emergency	y		1					0
p2019	"I'm a Mother Who Always Tries to Give My Children Hope"-Refugee Women's Experiences of Their Children's Mental Health	y		1					0
pace2020	"Place-ing" Dementia Prevention and Care in NunatuKavut, Labrador	n							0																1
page2012	Temperature-related deaths in people with psychosis, dementia and substance misuse	n							0														1																	1								1
pagliaccio2020	Prenatal exposure to polycyclic aromatic hydrocarbons modifies the effects of early life stress on attention and Thought Problems in late childhood	n							0																							1									1
pailler2018	The effects of climate variability on psychological well-being in India	n							0												1
pal2020	Study Protocol for the Evaluation of the Health Effects of Superblocks in Barcelona: The "Salut Als Carrers" (Health in the Streets) Project	n							0																1													1
palacios2020	Indoor environmental quality and learning outcomes: protocol on large-scale sensor deployment in schools	y		1					0
paley2013	Family systems and ecological perspectives on the impact of deployment on military families	y		1					0
palsdottir2018	The qualities of natural environments that support the rehabilitation process of individuals with stress-related mental disorder in nature-based rehabilitation	n							0																1																1
pannese2016	Gamified Wellbeing for All Ages - How Technology and Gamification Can Support Physical and Mental Wellbeing in the Ageing Society	y		1					0
papanikolaou2011	Psychological distress following wildfires disaster in a rural part of Greece: a case-control population-based study	n							0															1														1					1			1
paraskevopoulou2018	The impact of seasonal colour change in planting on patients with psychotic disorders using biosensors	n							0																1															1
park2017	Noise sensitivity, rather than noise level, predicts the non-auditory effects of noise in community samples: a population-based survey	n							0											1																		1			1					1
park2018	Low Income as a Vulnerable Factor to the Effect of Noise on Insomnia	y	1						0
parker2014	'Acoustic shock': a new occupational disease? observations from clinical and medico-legal practice	y		1					0
parkinson2013	The Arctic Human Health Initiative: a legacy of the International Polar Year 2007-2009	y		1					0
parra2018	Attributional Biases in Psychiatric Patients, a Religious, and a Control Group in the Assessment of a Hallucinatory Experience: The "White Christmas Test"	y							1	language
parry2019	The (in)visible health risks of climate change	y	1						0
pasanen2014	The relationship between perceived health and physical activity indoors, outdoors in built environments, and outdoors in nature	n							0																1
pasanen2019	Neighbourhood blue space, health and wellbeing: The mediating role of different types of physical activity	n							0																	1												1
pascua2017	Beyond services: A process and framework to incorporate cultural, genealogical, place-based, and indigenous relationships in ecosystem service assessments	y	1						0
pashkov2019	Natural environment as component of public health: some aspects of its legal regulation	y		1					0
pastor2015	The ability to manage self-proposed projects between 1;3 and 2;0 years old: a study of inhibition and resistance to interference	y		1					0
pati2019	Non-communicable Disease Risk Reduction Teaching in India: A Curricular Landscape	y	1						0
patrick2011	It's here! Are we ready? Five case studies of health promotion practices that address climate change from within Victorian health care settings	n							0			1																										1
patten2014	Changing perceptions of mental health in Canada	y		1					0
paul2020	Traffic-Related Air Pollution and Incident Dementia: Direct and Indirect Pathways Through Metabolic Dysfunction	n							0																							1
pawlaczyk2014	Evaluation of annoyance from the wind turbine noise: a pilot study	n							0											1
pazzaglia2013	A critical comparison of discrete-state and continuous models of recognition memory: implications for recognition and beyond	y		1					0
peacock2017	School-Based Disaster Recovery: Promotion of Children's Mental Health Over the Long Haul	n							0								1	1																				1
pearce2015	CUT FROM 'COUNTRY': THE IMPACT OF CLIMATE CHANGE ON THE MENTAL HEALTH OF ABORIGINAL PASTORALISTS	y		1					0
pearson2013	Health Benefits from Urban Agriculture Using Organic Methods	y		1					0
pearson2019a	Effects of freshwater blue spaces may be beneficial for mental health: A first, ecological study in the North American Great Lakes region	n							0																	1																		1		1
pedata2014	[Using the Mini-Mental State Examination (MMSE) for preliminary assessment of cognitive impairment in subjects exposed to air pollution with particulate matter]	y							1	language
pedersen2012	Farm Animal-Assisted Intervention for People with Clinical Depression: A Randomized Controlled Trial	y		1					0
pedersen2015	Which substance is most dangerous? Perceived harm ratings among students in urban and rural Norway	y		1					0
pendrey2020	General practice in the era of planetary health: Responding to the climate health emergency	y	1						0
peng2015	Research on the Psychological Effect of Low-frequency Noise on People and its Evaluation Methods	n							0
perimal2020	Campus Mental Well-Being: Opportunities for Digital Health	y		1					0
perry2015	The development and implementation of a pilot CBT for early psychosis service: achievements and challenges	y		1					0
perticas2015	ECONOMETRIC TESTING OF THE RELATIONSHIP BETWEEN THE CO2 LEVEL AND LIFE EXPECTANCY IN ROMANIA	y	1						0
pesce2014	Iodide transport: implications for health and disease	y		1					0
pescosolido2015	The Theory of Industrial Society and Cultural Schemata: Does the "Cultural Myth of Stigma" Underlie the WHO Schizophrenia Paradox?	y		1					0
peterson2016	Developing a Roadmap for Interprofessional Education in Community-Based Mental Health Sites: Learning the Landscape, Signposts, Detours, and Reaching the Destination	y		1					0
petrasek2015	Protective factors for mental health and well-being in a changing climate: Perspectives from Inuit youth in Nunatsiavut, Labrador	n							0			1																										1
peyron2018	Complex Suicide by Self-stabbing and Drowning: A Case Report and a Review of Literature	y	1	1					0
pham2015	Computerized assessment of communication for cognitive stimulation for people with cognitive decline using spectral-distortion measures and phylogenetic inference	y		1					0
phelps2019	Overcoming drought vulnerability in rangeland communities: lessons from central-western Queensland	y	1						0
phillips2013	Older people and outdoor environments: Pedestrian anxieties and barriers in the use of familiar and unfamiliar spaces	y	1	1					0
phillips2013a	PREDICTORS OF MENTAL HEALTH AFTER A DISASTER: A STUDY OF OLDER ADULTS FOUR YEARS AFTER THE 2007 SAN DIEGO COUNTY WILDFIRES	n							0
phillips2015	Eating disorders and spirituality in college students	y		1					0
philo2014	Same, Other, NIMBY and an asylum by the sea: revisiting 'Not at our seaside'	y	1	1					0
piat2017	(Em) placing recovery: Sites of health and wellness for individuals with serious mental illness in supported housing	y		1					0
pickard2015	Psychopathology and the Ability to Do Otherwise	y		1					0
picking2015	TRAMIL ethnomedicinal survey in Jamaica	y		1					0
picot2015	Coordinating end of life care for individuals with a mental illness--A nurse practitioner collaboration	y		1					0
pochee2017	Understanding design scales for a range of potential green infrastructure benefits in a London Garden City	n							0																1													1
poirel2011	Evidence of Different Developmental Trajectories for Length Estimation According to Egocentric and Allocentric Viewpoints in Children and Adults	n							0																1
polain2011	Rapid change, climate adversity and the next 'big dry': older farmers' mental health	n							0						1																							1
pollack2016	Mental health, life functioning and risk factors among people exposed to frequent natural disasters and chronic poverty in Vietnam	n							0		1																																				1	1
pollock2019	Collaborative approaches to wellness and health equity in the Circumpolar North: Introduction to the Special Issue	y	1						0
pomerantz2010	The White River model of colocated collaborative care: A platform for mental and behavioral health care in the medical home	y		1					0
poon2016	Making in-roads across the youth mental health landscape in Singapore: the Community Health Assessment Team (CHAT)	y		1					0
porta2016	Air Pollution and Cognitive Development at Age 7 in a Prospective Italian Birth Cohort	n							0																							1
porter2019	Assessing health impacts of home food gardens with Wind River Indian Reservation families: protocol for a randomised controlled trial	n							0																1													1
post2010	Mechanisms of illness progression in the recurrent affective disorders	y		1					0
potvin2017	Coping with a changing soundscape: avoidance, adjustments and adaptations	y						1	0
poulsen2019	Impact of Long-Term Exposure to Wind Turbine Noise on Redemption of Sleep Medication and Antidepressants: A Nationwide Cohort Study	n							0											1																							1
powers2012	Empirical evidence suggests adverse climate events have not affected Australian women's health and well-being	n							0		1																											1			1
powers2015	Lack of association between drought and mental health in a cohort of 45-61 year old rural Australian women	n							0						1																							1
prescott2018	Dysbiotic drift and biopsychosocial medicine: how the microbiome links personal, public and planetary health	y		1					0
prescott2019	Eighth Annual Conference of inVIVO Planetary Health: From Challenges to Opportunities	y		1					0
prescott2020a	Spaceship Earth Revisited: The Co-Benefits of Overcoming Biological Extinction of Experience at the Level of Person, Place and Planet	y		1					0
prohaska2019	Impact of Natural Disasters on Health Outcomes and Cancer Among Older Adults	y	1						0
provost2015	UMEME: University of Michigan Emotional McGurk Effect Data Set	y		1					0
psarros2015	Insomnia is Related to the Early Development of PTSD in Victims of Wildfires	n							0															1																							1
psarros2017	Insomnia and PTSD one month after wildfires: evidence for an independent role of the "fear of imminent death"	n							0															1																							1
psarros2018	Personality characteristics and individual factors associated with PTSD in firefighters one month after extended wildfires	n							0															1														1									1
puiu2017	Age-related cognitive decline as a function of daytime testing	n							0											1
pun2017a	Association of Ambient Air Pollution with Depressive and Anxiety Symptoms in Older Adults: Results from the NSHAP Study	n							0																							1											1			1
pun2019	Close proximity to roadway and urbanicity associated with mental ill-health in older adults	n							0											1												1									1		1			1
punnoose2019	Disasters And Mental Health - Lessons Learned The From Kerala Floods (Symposium)	y							1	Conference
purcell2018	Rural health service managers' perspectives on preparing rural health services for climate change	y	1						0
putrik2015	Living environment matters: relationships between neighborhood characteristics and health of the residents in a Dutch municipality	n							0											1					1																		1
qi2015	[The effect of improving the physical and mental health on different rehabilitation programs for post-linguistic cochlear implantees]	y							1	language
quoidbach2014	Emodiversity and the Emotional Ecosystem	y		1					0
rabelo2018	Prevalence of mental health problems among isolated indigenous youth from Amazonian forest	y		1					0
radcliff2018	A Model for Measuring Ambulatory Access to Care Recovery after Disasters	y	1						0
ramchand2017	Suicide Prevention Hotlines in California: Diversity in Services, Structure, and Organization and the Potential Challenges Ahead	y		1					0
ramchand2019	Exposure to the Deepwater Horizon Oil Spill, Associated Resource Loss, and Long-Term Mental and Behavioral Outcomes	n							0																												1						1			1		1
rana2013	Faith herbal healer knowledge document of Nanda Devi Biosphere Reserve, Uttarakhand, India	y		1					0
rasolofoson2020	Forest Conservation: A Potential Nutrition-Sensitive Intervention in Low- and Middle-Income Countries	y		1					0
rawlett2019	Perceived Needs for Adolescent Mental Health in an Urban Community	y		1					0
razjouyan2020	Toward Using Wearables to Remotely Monitor Cognitive Frailty in Community-Living Older Adults: An Observational Study	y		1					0
redshaw2013	Potential changes in disease patterns and pharmaceutical use in response to climate change	y	1						0
reifels2014	Patterns and predictors of primary mental health service use following bushfire and flood disasters	n							0		1																																1			1
reifels2015	Patterns and Predictors of Primary Mental Health Service Use Following Bushfire and Flood Disasters	y							1	duplicate
reindl2016	Young children spontaneously invent wild great apes' tool-use behaviours	y		1					0
ren2019	Do cognitive and non-cognitive abilities mediate the relationship between air pollution exposure and mental health?	n							0																							1						1
rey2016	[Cost-effectiveness of a brief intervention to support indigenous women in Hidalgo (Mexico) who live with alcohol abusers]	y							1	language
rezaei2014	Understanding Data Collection Behaviour of Mental Health Practitioners	y		1					0
rhodes2017	A Case for Open Network Health Systems: Systems as Networks in Public Mental Health	y		1					0
rice2016	Climate change and mental health: Rationale for research and intervention planning	y			1				0
richardson2017	The role of public and private natural space in children's social, emotional and behavioural development in Scotland: A longitudinal study	n							0																1
rigby2011	If the land's sick, we're sick:* The impact of prolonged drought on the social and emotional well-being of Aboriginal communities in rural New South Wales	y		1					0
riley2018	Including Health in Environmental Assessments of Major Transport Infrastructure Projects: A Documentary Analysis	y		1					0
ritchie2020	Long-Term Mental Health Effects of a Devastating Wildfire Are Amplified by Sociodemographic and Clinical Antecedents in College Students	n							0															1																			1			1	1
rivas2019	Association between Early Life Exposure to Air Pollution and Working Memory and Attention	n							0																							1
rivers2011	Morbidity among bystanders of bullying behavior at school: concepts, concerns, and clinical/research issues	y		1					0
roberts2015	Structured community activity for forensic mental health - a feasibility study	y	1						0
roberts2018	Comment on "Using functional Magnetic Resonance Imaging (fMRI) to analyze brain region activity when viewing landscapes"	n							0																1													1
roberts2019	Exploration of NO(2) and PM(2.5) air pollution and mental health problems using high-resolution data in London-based children from a UK longitudinal cohort study	n							0																							1											1			1
robinson2020	Let Nature Be Thy Medicine: A Socioecological Exploration of Green Prescribing in the UK	y	1						0
robles2019	A Geospatial Analysis of Health, Mental Health, and Stressful Community Contexts in Los Angeles County	y	1						0
rock2020	Regional planning for meaningful person-centred care in mental health: context is the signal not the noise	y	1						0
rodr2020	Comparison of Night, Day and 24 h Motor Activity Data for the Classification of Depressive Episodes	y		1					0
rodrigues2016	Performance evaluation in teaching environments on climate change	y	1						0
rodriguez2015	Children's and adolescents' thoughts on pollution: cognitive abilities required to understand environmental systems	y		1					0
roe2011	The restorative benefits of walking in urban and rural settings in adults with good and poor mental health	n							0																1													1
roe2011a	The restorative outcomes of forest school and conventional school in young people with good and poor behaviour	n							0																				1
rogerson2017	Commentary: Environmental Influences on Elite Sport Athletes Well Being: From Gold, Silver, and Bronze to Blue, Green and Gold	y							1	commentary
rogerson2020	Regular Doses of Nature: The Efficacy of Green Exercise Interventions for Mental Wellbeing	n							0																1
rojas2019	Exposure to nanometric pollutants in primary schools: Environmental implications	y	1						0
rolin2019	Wellness Interventions in Psychiatrically Ill Patients: Impact of WILD 5 Wellness, a Five-Domain Mental Health Wellness Intervention on Depression, Anxiety, and Wellness	y		1					0
rose2019	Unsheltered Homelessness in Urban Parks: Perspectives on Environment, Health, and Justice in Salt Lake City, Utah	y	1						0
rosenberg2013	Making activity-based funding work for mental health	y		1					0
rossati2017	Global Warming and Its Health Impact	y	1						0
roswall2015	Residential exposure to traffic noise and health-related quality of life--a population-based study	n							0											1																		1
roy2015	Predictors of Neurocognitive Syndromes in Combat Veterans	y		1					0
roysden2015	Predicting Health Care Utilization After Behavioral Health Referral Using Natural Language Processing and Machine Learning	y		1					0
royuela2020	[Inbreeding and serious mental illness in the first Spanish Bourbons]	y							1	language
rozenblatt2018	Work: Disease, Cure, and National Ethos in Modern Italy	y		1					0
rubanovich2017	Health App Use Among Individuals With Symptoms of Depression and Anxiety: A Survey Study With Thematic Coding	y		1					0
rucci2012	Integration between Primary Care and Mental Health Services in Italy: Determinants of Referral and Stepped Care	y		1					0
rudolph2019	Environmental noise and sleep and mental health outcomes in a nationally representative sample of urban US adolescents	y	1						0
rudolphi2020	Farmers' Mental Health: Perceptions from a Farm Show	y		1					0
rugel2017	Beyond the Normalized Difference Vegetation Index (NDVI): Developing a Natural Space Index for population-level health research	y	1						0
rugel2019	Exposure to natural space, sense of community belonging, and adverse mental health outcomes across an urban region	n							0																1													1					1
ruiz2018	STUDY ABOUT NOISE LEVELS IN UNIVERSITY STUDENTS' LEISURE AREAS: A BARRIER AGAINST NOISE	y	1						0
rung2016	Depression, Mental Distress, and Domestic Conflict among Louisiana Women Exposed to the Deepwater Horizon Oil Spill in the WaTCH Study	n							0																												1	1					1
russell2017	The Adventure Therapy Experience Scale: The Psychometric Properties of a Scale to Measure the Unique Factors Moderating an Adventure Therapy Experience	n							0																1													1
ryan2019	Determining Key Influences on Patient Ability to Successfully Manage Noncommunicable Disease After Natural Disaster	n							0		1																											1
ryder2012	Depression in cultural context: "Chinese somatization," revisited	y		1					0
saeb2017	Mobile Phone Detection of Semantic Location and Its Relationship to Depression and Anxiety	y	1						0
sakano2018	Paving the way for the future of child and adolescent mental health in Japan	y		1					0
sakhnini2018	myCityMeter: Helping Older Adults Manage the Environmental Risk Factors for Cognitive Impairment	y	1						0
sakhnini2018a	myCityMeter Wearable: Measuring the Environmental Risk Factors for Cognitive Impairment in Older Adults	y	1						0
sakuma2015	Post-traumatic stress disorder and depression prevalence and associated risk factors among local disaster relief and reconstruction workers fourteen months after the Great East Japan Earthquake: a cross-sectional study	n							0								1																														1
salgado2018	Coping strategies for stress and pathological symptoms in university students in the face of a mudslide disaster	y							1	language
samele2015	Psychiatric inpatient care: where do we go from here?	y		1					0
sampson2017	Landscape care of urban vacant properties and implications for health and safety: Lessons from photovoice	y	1						0
sanguanklin2014	Effects of the 2011 flood in Thailand on birth outcomes and perceived social support	y	1						0
saniotis2010	Climate change and the possible health effects on older Australians	y		1					0
santillanes2019	Medical Clearance of Psychiatric Patients in the Emergency Department	y		1					0
sargent2020	Shared mechanisms for cognitive impairment and physical frailty: A model for complex systems	y		1					0
sarkar2013	Urban built environment configuration and psychological distress in older men: results from the Caerphilly study	n							0																					1								1
sarkar2018	Residential greenness and prevalence of major depressive disorders: a cross-sectional, observational, associational study of 94ÈÃÛ879 adult UK Biobank participants	n							0																1																		1
sass2017	The effects of air pollution on individual psychological distress	n							0																							1						1
satariano2019	Blue therapeutic spaces on islands: Coastal landscapes and their impact on the health and wellbeing of people in Malta	n							0																	1
sattler2017a	Climate Change and Extreme Weather Events: The Mental Health Impact	y							1	duplicate											1																	1
schalinski2016	Type and timing of adverse childhood experiences differentially affect severity of PTSD, dissociative and depressive symptoms in adult inpatients	y		1					0
schalinski2019	Environmental adversities and psychotic symptoms: The impact of timing of trauma, abuse, and neglect	y		1					0
scharte2012	[Children of single mothers: health risks and environmental stress]	y							1	language
schilling2015	Development of an intervention to reduce self-stigma in outpatient mental health service users in Chile	y		1					0
schmitz2019	A retrospective analysis of determinants of involuntary psychiatric in-patient treatment	y		1					0
schneider2014	Cognitive abilities in preterm and term-born adolescents	y		1					0
scholz2019	'There's just no flexibility': How space and time impact mental health consumer research	y	1	1					0
schrader2013	"Cultural cognition": what mental health researchers and clinicians might learn from the climate change debate	y	1						0
schreckenberg2010	The associations between noise sensitivity, reported physical and mental health, perceived environmental quality, and noise annoyance	n							0											1																		1
schultze2018	Psychopathology-a Precision Tool in Need of Re-sharpening	y		1					0
schulz2019	[Breathing: Ambient Air Pollution and Health - Part III]	y							1	language
schuurmans2020	A novel approach to improve stress regulation among traumatized youth in residential care: Feasibility study testing three game-based meditation interventions	y		1					0
schwartz2014	Looking at non-communicable diseases in Uganda through a local lens: an analysis using locally derived data	y	1						0
schwartz2017	Longitudinal Impact of Hurricane Sandy Exposure on Mental Health Symptoms	n							0										1																								1			1	1
schwartz2019	Examining Associations Between Hurricane Sandy Exposure and Posttraumatic Stress Disorder by Community of Residence	n							0										1																												1
schweitzer2014	Narratives of healing: A case study of a young Liberian refugee settled in Australia	y		1					0
schwenk2019	Outdoor Therapy: An Interpretative Phenomenological Analysis Examining the Lived-Experience, Embodied, and Therapeutic Process through Interpersonal Process Recall	y		1					0
scott2010a	Continuing the Discussion: A Commentary on "Wilderness Therapy: Ethical Considerations for Mental Health Professionals"	n							0																1													1
sea2018	Body Disposal: Spatial and Temporal Characteristics in Korean Homicide	y	1	1					0
seabrook2020	Understanding How Virtual Reality Can Support Mindfulness Practice: Mixed Methods Study	n							0																1
seaton2020	Pollution, Particles, and Dementia: A Hypothetical Causative Pathway	y		1					0
sebastian2012	Don't leave me out!	n							0
sebayang2019	Body Mass Index Is Associated with Mental Health Problems in Coastal Communities of Banyuwangi, Indonesia	y		1					0
seidel2014	Health adaptation policy for climate vulnerable groups: a 'critical computational linguistics' analysis	y	1	1					0
settineri2016	Metereological conditions and Psychiatric Emergency Visits in Messina, Italy	n							0												1																	1
shagdarsuren2017	Association between perceived neighborhood environment and health of middle-aged women living in rapidly changing urban Mongolia	n							0																1													1
shalev2013	Stress and telomere biology: a lifespan perspective	y		1					0
shapiro2014	Psychodynamic Formulation in the Age of Neuroscience: A Dynamical Systems Model	y		1					0
shapiro2015	Dynamical Systems Therapy (DST): Theory and Practical Applications	y		1					0
sharma2016	Impact of Globalisation on Mental Health in Low- and Middle-income Countries	y		1					0
sharma2017	Assessment of Mental Health Literacy in School-going Adolescents	y		1					0
shea2017	Ending Disparities and Achieving Justice for Individuals with Mental Disabilities	y		1					0
sheehan2016	Nursing's Critical Role in the Shifting Landscape of Mental Health	y		1					0
sheffield2018	Association between particulate air pollution exposure during pregnancy and postpartum maternal psychological functioning	n							0																							1						1
shehab2019	Effects of short-term exposure to particulate matter air pollution on cognitive performance	n							0																							1
shenesey2015	Perceived resilience: Examining impacts of the deepwater horizon oil spill one-year post-spill	n							0																												1	1					1				1
sheng2010	Prenatal Polycyclic Aromatic Hydrocarbon Exposure Leads to Behavioral Deficits and Downregulation of Receptor Tyrosine Kinase, MET	n							0																							1
shi2020	Reevaluating the subjective welfare loss of air pollution	n							0																							1
shih2020	Increased incidence of stress-associated illnesses among elderly after Typhoon Morakot	n							0										1																			1			1		1			1	1
shin2018	Long-term exposure to ambient air pollutants and mental health status: A nationwide population-based cross-sectional study	n							0																							1									1	1	1
shioda2020	Community integration and related factors among people with mental illness in Japan: Multiple regression analysis stratified by social isolation level	y		1					0
shiue2015	Neighborhood epidemiological monitoring and adult mental health: European Quality of Life Survey, 2007-2012	n							0											1															1	1		1
shiue2016	People with dyslexia and?ßheart, chest, skin, digestive, musculoskeletal, vision, learning, speech and mental disorders were more dissatisfied with neighbourhoods: Scottish Household Survey, 2007-2008	y	1						0
shojaie2018	Structural explanation and investigation of residential complexes using the sustainable development approach	y	1						0
shore2014	Marking time in the land of plenty: reflections on mental health in the United States	y		1					0
shrestha2018	Mental Health Risk Adjustment with Clinical Categories and Machine Learning	y		1					0
shrestha2019	Early Life Exposure to Air Pollution, Cognitive Development, and Labor Market Outcome	y			1				1	duplicate
shukor2018	Developing Community-Based Primary Health Care for Complex and Vulnerable Populations in the Vancouver Coastal Health Region: HealthConnection Clinic	y		1					0
shultz2015	The 2010 Deepwater Horizon oil spill: the trauma signature of an ecological disaster	n							0																												1	1
shultz2019	Public Health and Mental Health Implications of Environmentally Induced Forced Migration	y	1	1					0
sidandi2011	Mental health in Botswana	y		1					0
sidenius2017	"I look at my own forest and fields in a different way": the lived experience of nature-based therapy in a therapy garden when suffering from stress-related illness	n							0																1
signoretta2019	Mental wellbeing, air pollution and the ecological state	n							0																							1
silk2011	Daily emotional dynamics in depressed youth: a cell phone ecological momentary assessment study	y		1					0
silva2017	Memory's Intricate Web	y	1	1					0
silveira2019	Patterns and correlates of polysubstance use among US youth aged 15-17?ßyears: wave 1 of the Population Assessment of Tobacco and Health (PATH) Study	y		1					0
silveirinha2013	How effective is the Forestry Commission Scotland's woodland improvement programme--'Woods In and Around Towns' (WIAT)--at improving psychological well-being in deprived urban communities? A quasi-experimental study	n							0																				1												1
simkin2020	Restorative effects of mature and young commercial forests, pristine old-growth forest and urban recreation forest - A field experiment	n							0																				1
sinha2018	Is India ready for mental health apps (MHApps)? A quantitative-qualitative exploration of caregivers' perspective on smartphone-based solutions for managing severe mental illnesses in low resource settings	y		1					0
sipon2015	Spirituality among Flood Victims: A Comparison between Two States	y		1					0
sivarajah2018	Tree cover and species composition effects on academic performance of primary school students	n							0																1
skale2020	Factors Influencing Implementation of Evidence-Based Mental Health Interventions for Infants and Young Children	y		1					0
skovdal2012	Pathologising healthy children? A review of the literature exploring the mental health of HIV-affected children in sub-Saharan Africa	y		1					0
slekiene2018	Characterizing the Last Latrine Nonowners in Rural Malawi	y		1					0
smallman2010	Spirit Beings, Mental Illness, and Murder: Fur Traders and the Windigo in Canada's Boreal Forest, 1774 to 1935	y		1					0
snodgrass2017	Religious Ritual Is Good Medicine for Indigenous Indian Conservation Refugees Implications for Global Mental Health	y		1					0
soares2020	PERSPECTIVES: Insurance markets, labor markets, and the mental health services delivery system	y		1					0
soga2017	Health Benefits of Urban Allotment Gardening: Improved Physical and Psychological Well-Being and Social Integration	n							0																1													1
soleimani2020	An overview of bioaerosol load and health impacts associated with dust storms: A focus on the Middle East	y	1						0
song2014	Physiological and psychological responses of young males during spring-time walks in urban parks	n							0																1
song2015	Elucidation of a physiological adjustment effect in a forest environment: a pilot study	y	1						0
song2019	Assessing the effects of haze pollution on subjective well-being based on Chinese General Social Survey	n							0																										1
song2019a	Association between Urban Greenness and Depressive Symptoms: Evaluation of Greenness Using Various Indicators	n							0																1																		1
song2020	Effects of an Urban Forest-Based Health Promotion Program on Children Living in Group Homes	n							0																				1
sonntag2015	Can rehabilitation in boreal forests help recovery from exhaustion disorder? The randomised clinical trial ForRest	n							0																				1										1
sood2016	The Global Mental Health movement and its impact on traditional healing in India: A case study of the Balaji temple in Rajasthan	y		1					0
south2018	Effect of Greening Vacant Land on Mental Health of Community-Dwelling Adults: A Cluster Randomized Trial	n							0																1													1					1
sperry2018	Psychopathology, everyday behaviors, and autonomic activity in daily life: An ambulatory impedance cardiography study of depression, anxiety, and hypomanic traits	y		1					0
sprague2015	Youth Psychosocial Adjustment Following Wildfire: The Role of Family Resilience, Emotional Support, and Concrete Support	n							0															1																1			1			1
sprah2014	The wellbeing of Slovenia's population by region: comparison of indicators with an emphasis on health	y		1					0
stanley2015	Climate Change and Children's Health: A Commentary	y	1						0
stanley2018	Wildland firefighters and suicide risk: Examining the role of social disconnectedness	n							0															1																		1
stansfeld2015a	Noise sensitivity and future risk of illness and mortality	n							0											1																		1					1
staudt2016	In the shadow of a steel recycling plant in these neoliberal times: health disparities among Hispanics in a border colonia	n							0											1															1			1
stawarz2019	Use of Smartphone Apps, Social Media, and Web-Based Resources to Support Mental Health and Well-Being: Online Survey	y		1					0
stepleman2019	Health Needs and Experiences of a LGBT Population in Georgia and South Carolina	y		1					0
stevens2018	Designing the Correctional Landscape: An Invitation to Landscape Architecture Professionals	y		1					0
stewart2017	A multi-perspective examination of heat waves affecting Metro Vancouver: now into the future	y	1						0
stickley2017	Airborne pollen and suicide mortality in Tokyo, 2001-2011	n							0																										1							1
stoor2019	"If you do not birget [manage] then you don't belong here": a qualitative focus group study on the cultural meanings of suicide among Indigenous S?Ými in arctic Norway	y		1					0
stubbings2019	A Hierarchical Urban Forest Index Using Street-Level Imagery and Deep Learning	y	1						0
stylianidis2019	The impact of the long-lasting socioeconomic crisis in Greece	y		1					0
su2014	EmotionO plus : Physiological Signals Knowledge Representation and Emotion Reasoning Model for Mental Health Monitoring	y		1					0
sui2018	The association between ambient air pollution exposure and mental health status in Chinese female college students: a cross-sectional study	n							0																							1						1
sun2018	Negative Emotion under Haze: An Investigation Based on the Microblog and Weather Records of Tianjin, China	n							0																							1
sunyer2015	Association between traffic-related air pollution in schools and cognitive development in primary school children: a prospective cohort study	n							0																							1
syed2011	Mental health in Somalia	y		1					0
sygna2014	Road traffic noise, sleep and mental health	n							0											1
szyszkowicz2018	Ambient air pollution exposure and emergency department visits for substance abuse	n							0																							1																1
szyszkowicz2020	Air Pollution and Emergency Department Visits for Mental Disorders among Youth	n							0																							1						1
tacker2019	Belonging, Therapeutic Landscapes, and Networks: Implications for Mental Health Practice	y		1					0
tallman2019	Water insecurity and mental health in the Amazon: Economic and ecological drivers of distress	n							0					1																								1
tallon2017	Cognitive impacts of ambient air pollution in the National Social Health and Aging Project (NSHAP) cohort	n							0																							1
tally2013	The impact of the San Diego wildfires on a general mental health population residing in evacuation areas	n							0															1														1
tamasese2020	Asiasiga i A'oga ma Nu'u: a child and adolescent post-tsunami intervention based on Indigenous Samoan values	n							0									1																				1
tana2018	Diurnal Variations of Depression-Related Health Information Seeking: Case Study in Finland Using Google Trends Data	y		1					0
tanaka2014	[Persistent depression with minute schizophrenia-like symptoms--from the viewpoint of "pluridimensional psychiatry"]	y							1	language
tanielian2016	Supporting the Mental Health Needs of Veterans in the Metro Detroit Area	y		1					0
tapak2018	Investigating the effect of climatic parameters on mental disorder admissions	n							0												1																						1	1					1
tarsitano2020	A "Park to Live" between environmental education and social inclusion through a landsense ecology approach	n							0																1													1
tasdik2020	Exploring mental health needs and services among affected population in a cyclone affected area in costal Bangladesh: a qualitative case study	n							0										1																			1
tate2020	Predicting mental health problems in adolescence using machine learning techniques	y		1					0
taverna2020	Tracing culture in children's thinking: a socioecological framework in understanding nature (Rastreando la cultura en el pensamiento infantil: una socioecologia para comprender la naturaleza)	y		1					0
tawatsupa2010	The association between overall health, psychological distress, and occupational heat stress among a large national cohort of 40,913 Thai workers	n							0														1															1
tawatsupa2012	Heat stress, health and well-being: findings from a large national cohort of Thai adults	n							0														1
taylor2016	RECONSIDERING SAMUEL a mental health caretaker at a Ghanaian prayer camp	y		1					0
taylor2019a	Structures of Confinement: Power and Problems of Male Identity	y		1					0
tehrani2019	The Color of Health: Residential Segregation, Light Rail Transit Developments, and Gentrification in the United States	y		1					0
temple2011	Teen dating violence and substance use following a natural disaster: does evacuation status matter?	n							0										1																													1
temte2019	Correlation Between Climate Change and Dysphoria in Primary Care	n							0			1
tesfaye2020	Khat induced psychotic disorder: case report	y		1					0
thake2017	A Psychoevolutionary Approach to Identifying Preferred Nature Scenes With Potential to Provide Restoration From Stress	n							0																1
thielecke2020	Clinical and Cost-Effectiveness of Personalized Tele-Based Coaching for Farmers, Foresters and Gardeners to Prevent Depression: Study Protocol of an 18-Month Follow-Up Pragmatic Randomized Controlled Trial (TEC-A)	y		1					0
thielke2011	Health psychology in primary care: recent research and future directions	y		1					0
thilakaratne2020	Examining the relationship between ambient carbon monoxide, nitrogen dioxide, and mental health-related emergency department visits in California, USA	n							0																							1						1
thomas2015	The role of natural environments within women's everyday health and wellbeing in Copenhagen, Denmark	n							0																1	1
thompson2016	Northeast Passage PATH (TM) Program A Strengths-Based and Recovery-Oriented Approach for Veterans Who Experience Mental Health Disorders	y		1					0
thompson2019a	Enhancing Health Through Access to Nature: How Effective are Interventions in Woodlands in Deprived Urban Communities? A Quasi-experimental Study in Scotland, UK	n							0																				1												1
thomson2013	Housing improvements for health and associated socio-economic outcomes	y		1					0
tian2013	Fresh Air Exchange Method Research of Residential House Based on Natural Ventilation	y		1					0
tian2015	Effect of Air Pollution and Rural-Urban Difference on Mental Health of the Elderly in China	n							0																							1						1
tillmann2018	Children and Nature: Linking Accessibility of Natural Environments and Children's Health-Related Quality of Life	n							0																1
tiwari2013	The Indian concepts of lifestyle and mental health in old age	y		1					0
tobah2017	Constructing Mental Illness: Comparing Discourses on Mental Health, Illness, and Depression by Muslim Leaders with those found in Consumer Health Materials	y		1					0
tobin2011	The role of individual well-being in risk perception and evacuation for chronic vs. acute natural hazards in Mexico	n							0		1
todorow2018	The medical home for children with autism spectrum disorder: an essential element whose time has come	y		1					0
tom2016	Proceedings of the 3rd IPLeiria's International Health Congress : Leiria, Portugal. 6-7 May 2016	y		1					0
tomita2014	[Perspectives on researches in disaster psychiatry]	y							1	language
tomita2017	Green environment and incident depression in South Africa: a geospatial analysis and mental health implications in a resource-limited setting	n							0																1																		1
tomlin2020	The climate crisis and forensic mental healthcare: what are we doing?	y	1						0
tong2016	Climate change, food, water and population health in China	y	1						0
tong2019	World Mental Health Day 2018, but how aware are medical students?	y		1					0
torous2017	The Ethical Use of Mobile Health Technology in Clinical Psychiatry	y		1					0
tosone2015	Shared Traumatic Stress among Social Workers in the Aftermath of Hurricane Katrina	n							0										1
tozzi2020	The human connectome project for disordered emotional states: Protocol and rationale for a research domain criteria study of brain connectivity in young adult anxiety and depression	y		1					0
tran2020	Linked Sources of Neural Noise Contribute to Age-related Cognitive Decline	y		1					0
tremain2017	The PARENTED Outline for Observing Hospitalized Pediatric Patients and Their Families	y		1					0
tsai2018	Relationships between Characteristics of Urban Green Land Cover and Mental Health in U.S. Metropolitan Areas	n							0																1													1
tsamakis2020	COVID-19 related stress exacerbates common physical and mental pathologies and affects treatment (Review)	y		1					0
tseng2016	The Health Benefits of Children by Different Natural Landscape Contacting Level	n							0																1													1
tsurumi2018	Greenery and Subjective Well-being: Assessing the Monetary Value of Greenery by Type	n							0																1
tucker2015	The Role of Transport Use in Adolescent Wilderness Treatment: Its Relationship to Readiness to Change and Outcomes	y		1					0
tucker2016	The Impact of Wilderness Therapy: Utilizing an Integrated Care Approach	n							0																1													1
twomey2018	All the Right Noises: Background Variability Helps Early Word Learning	y		1					0
uijtdewilligen2019	The Park Prescription Study: Development of a community-based physical activity intervention for a multi-ethnic Asian population	y	1						0
ungar2015	Practitioner Review: Diagnosing childhood resilience--a systemic approach to the diagnosis of adaptation in adverse social and physical ecologies	y		1					0
unnikrishnan2012	Study of Depression and Its Associated Factors among Women Living with HIV/AIDS in Coastal South India	y		1					0
usami2018	Addressing challenges in children's mental health in disaster-affected areas in Japan and the Philippines - highlights of the training program by the National Center for Global Health and Medicine	y	1						0
uttervall2014	After the flood: resilience among tsunami-afflicted adolescents	n							0									1																				1
vaidyam2020	Patient Innovation in Investigating the Effects of Environmental Pollution in Schizophrenia: Case Report of Digital Phenotyping Beyond Apps	y		1					0
valcour2011	A LOSS OF COLOUR: MENTAL HEALTH IN SOUTH LABRADOR COASTAL COMMUNITIES	y		1					0
valenti2010	The role of air quality in perception of health of the local population	y	1						0
valois2016	The Health Impacts of Climate Change: A Continuing Medical Education Needs Assessment Framework	y		1					0
valois2017	Development and Validation of a Behavioural Index for Adaptation to High Summer Temperatures among Urban Dwellers	y	1						0
valois2019	Development and validation of five behavioral indices of flood adaptation	y	1						0
van2015c	Moving to Serene Nature May Prevent Poor Mental Health--Results from a Swedish Longitudinal Cohort Study	n							0																1													1
van2018	Quantifying the visual-sensory landscape qualities that contribute to cultural ecosystem services using social media and LiDAR	y	1						0
van2018a	'Mind the Gap' between ecosystem services classification and strategic decision making	y	1						0
van2019a	Using Computer Games to Support Mental Health Interventions: Naturalistic Deployment Study	y		1					0
van2019c	Prevention of mental health effects by climate change and environmental drivers	y		1					0
van2020b	Development of Prediction Models for Sickness Absence Due to Mental Disorders in the General Working Population	y		1					0
van't2020	Effectiveness of Group Problem Management Plus (Group-PM+) for adults affected by humanitarian crises in Nepal: study protocol for a cluster randomized controlled trial	y		1					0
vergara2018	How Coal Kept My Valley Green: Forest Conservation, State Intervention, and the Transition to Fossil Fuels in Mexico	y	1						0
verhey2013	Mild cognitive impairment is becoming more psychosocial	y		1					0
verplanken2013	"My worries are rational, climate change is not": habitual ecological worrying is an adaptive response	n							0			1																										1
vert2017	Effect of long-term exposure to air pollution on anxiety and depression in adults: A cross-sectional study	n							0																							1											1			1
vickery2010	Widening the Psychiatric gaze: reflections on PsychoDoctor, depression, and recent transitions in japanese mental health care	y		1					0
vida2011	[Vulnerability to environmental heat among persons with mental health problems]	y							1	language
vida2012	Relationship between ambient temperature and humidity and visits to mental health emergency departments in Qu?«bec	n							0														1															1
vincett2018	Researcher self-care in organizational ethnography: Lessons from overcoming compassion fatigue	y	1	1					0
visagie2017	Factors related to environmental barriers experienced by persons with and without disabilities in diverse African settings	y		1					0
vogel2018	Linking Marine Ecosystem Services to the North Sea's Energy Fields in Transnational Marine Spatial Planning	y	1	1					0
voltas2013	Socio-demographic and psychopathological risk factors in obsessive-compulsive disorder: Epidemiologic study of school population	y		1					0
von2013	Occupational engagement as a constraint on restoration during leisure time in forest settings	n							0																				1
vossoughi2015	The Roles Of Lung Function And Air Pollution On Cognitive Decline: Predictor And Mediator?	n							0																							1
vrotsou2017	A time-geographic approach for visualizing the paths of intervention for persons with severe mental illness	y		1					0
vujcic2017	Nature based solution for improving mental health and well-being in urban areas	n							0																1																1		1			1
wagner2016	A Structured Protocol Model of Depression Care versus Clinical Acumen: A Cluster Randomized Trial of the Effects on Depression Screening, Diagnostic Evaluation, and Treatment Uptake in Ugandan HIV Clinics	y		1					0
wagner2016a	A cluster randomized controlled trial of two task-shifting depression care models on depression alleviation and antidepressant response among HIV clients in Uganda	y		1					0
walsh2019	Relative importance of symptoms, cognition, and other multilevel variables for psychiatric disease classifications by machine learning	y		1					0
walters2014	Getting Active in the Gulf: Environmental Attitudes and Action Following Two Mississippi Coastal Disasters	y	1						0
wan2013	The Comparative Study of Tree Drawing Test on Chinese College Students and African Students	y		1					0
wang2010	Psychopathological, biological, and neuroimaging characterization of posttraumatic stress disorder in survivors of a severe coalmining disaster in China	y		1					0
wang2015	Social media as a sensor of air quality and public response in China	y		1					0
wang2015a	The influence of fan system and air conditioner on indoor particles in university dormitories	y		1					0
wang2016	Industrial water pollution, water environment treatment, and health risks in China	y	1						0
wang2017	Perceptions of human well-being across diverse respondents and landscapes in a mountain-basin system, China	y		1					0
wang2017a	Socioeconomic disparities and sexual dimorphism in neurotoxic effects of ambient fine particles on youth IQ: A longitudinal analysis	n							0																							1
wang2017b	Predicting Future High-Cost Schizophrenia Patients Using High-Dimensional Administrative Data	y		1					0
wang2018	Does chronic disease influence susceptibility to the effects of air pollution on depressive symptoms in China?	n							0																							1											1
wang2018a	The Relationship between Air Pollution and Depression in China: Is Neighbourhood Social Capital Protective?	n							0																							1											1
wang2018b	Analysis and Reference of the Public Hazards Prevention Agreement	y	1	1					0
wang2019	Urban greenery and mental wellbeing in adults: Cross-sectional mediation analyses on multiple pathways across different greenery measures	n							0																1
wang2019a	Cross-sectional associations between long-term exposure to particulate matter and depression in China: The mediating effects of sunlight, physical activity, and neighborly reciprocity	n							0																							1											1
wang2019d	Air Quality Forecasting Based on Gated Recurrent Long Short Term Memory Model in Internet of Things	y		1					0
wang2020	The longitudinal relationship between exposure to air pollution and depression in older adults	n							0																							1											1
wang2020a	Climate-change information, health-risk perception and residents' environmental complaint behavior: an empirical study in China	y	1						0
wang2020b	Residential greenness, air pollution and psychological well-being among urban residents in Guangzhou, China	n							0																1							1
wang2020c	Association of urban built environment and socioeconomic factors with suicide mortality in high-density cities: A case study of Hong Kong	y		1					0
wang2020d	Circulating Vitamin D Levels and Alzheimer's Disease: A Mendelian Randomization Study in the IGAP and UK Biobank	y		1					0
ward2019	Health impacts of environmental and social interventions designed to increase deprived communitiesÈÃÍ access to urban woodlands: a mixed-methods study	n							0																				1												1
warsini2014	Solastalgia: Living with the Environmental Damage Caused By Natural Disasters	n							0		1
wasiak2013	12-month generic health status and psychological distress outcomes following an Australian natural disaster experience: 2009 Black Saturday Wildfires	n							0															1														1
wass2019	Influences of environmental stressors on autonomic function in 12-month-old infants: understanding early common pathways to atypical emotion regulation and cognitive performance	n							0											1
watson2020	The association between natural outdoor environments and common somatic symptoms	n							0																1																1
weiss2020	Urbanization, and child mental health and life functioning in Vietnam: implications for global health disparities	y		1					0
weissler2018	Gender-Affirming Surgery in Persons with Gender Dysphoria	y		1					0
weisz2013	Evidence-based youth psychotherapy in the mental health ecosystem	y		1					0
weisz2019	Are Psychotherapies for Young People Growing Stronger? Tracking Trends Over Time for Youth Anxiety, Depression, Attention-Deficit/Hyperactivity Disorder, and Conduct Problems	y		1					0
weuve2012	Exposure to particulate air pollution and cognitive decline in older women	n							0																							1
weuve2012a	Polycyclic aromatic hydrocarbons, particulate air pollution, and cognitive decline-reply	y							1	reply
wheeler2018	Water torture: Unravelling the psychological distress of irrigators in Australia	n							0					1
white2013	Coastal proximity, health and well-being: results from a longitudinal panel survey	n							0																	1												1
white2020a	Mental wellbeing in the Anthropocene: Socio-ecological approaches to capability enhancement	n							0			1
wigger2013	What Do Invisible Friends Know? Imaginary Companions, God, and Theory of Mind	y		1					0
wildeman2010	Incarceration in fragile families	y		1					0
wilkinson2011	Current Trends in Remediating Adolescent Self-Injury: An Integrative Review	y		1					0
william2019	An actuarial investigation into maternal out-of-hospital cost risk factors	y		1					0
williams2012	Heat and health in Adelaide, South Australia: assessment of heat thresholds and temperature relationships	y	1						0
willis2016	Green space and health benefits: a QALY and CEA of a mental health programme	n							0																1
willox2013	Climate change and mental health: an exploratory case study from Rigolet, Nunatsiavut, Canada	n							0			1																										1
willox2015	Examining relationships between climate change and mental health in the Circumpolar North	n							0			1																										1
willox2016	Climate change: the next challenge for circumpolar mental health?	y							1	Conference
wilson2015	Rural Mental Health Ecology: A Framework for Engaging with Mental Health Social Capital in Rural Communities	y		1					0
wind2011	Social capital and post-disaster mental health	n							0		1																																1			1	1
windhorst2015	"It's like a different world": Natural places, post-secondary students, and mental health	n							0																1													1
windhorst2016	Bleeding at the roots: Post-secondary student mental health and nature affiliation	n							0																1													1
wingfield2020	A predictive model for paediatric autism screening	y		1					0
wolf2017	Is Variety the Spice of Life? An Experimental Investigation into the Effects of Species Richness on Self-Reported Mental Well-Being	n							0																						1
wolff2016	Determinants of per diem Hospital Costs in Mental Health	y		1					0
wong2012	Developments in early intervention for psychosis in Hong Kong	y		1					0
woodford2017	A Change of Scenery Wilderness Therapy Treatment for Inpatients in Acute Care	n							0																1
woodward2017	Preschool self regulation predicts later mental health and educational achievement in very preterm and typically developing children	y		1					0
wothge2017	The Combined Effects of Aircraft and Road Traffic Noise and Aircraft and Railway Noise on Noise Annoyance-An Analysis in the Context of the Joint Research Initiative NORAH	y	1						0
wright2018	Aircraft noise and self-assessed mental health around a regional urban airport: a population based record linkage study	n							0											1																		1
wshah2019	Predicting Posttraumatic Stress Disorder Risk: A Machine Learning Approach	y		1					0
wu2014	Linking student performance in Massachusetts elementary schools with the "greenness" of school surroundings using remote sensing	n							0																1
Wu2015a	Association between air pollutants and dementia risk in the elderly	n							0																							1
wu2015b	Older people, the natural environment and common mental disorders: cross-sectional results from the Cognitive Function and Ageing Study	n							0																1																		1			1
wu2019	Planned sheltering as an adaptation strategy to climate change: Lessons learned from the severe flooding in Anhui Province of China in 2016	y	1						0
wu2019b	[Application of Geospatial Information Technologies in Assessing Changes in Regional Health Risks Related to Climate Change]	y							1	language
wu2020	Attributable risk and economic cost of hospital admissions for mental disorders due to PM(2.5) in Beijing	n							0																							1						1
xie2015	Is occupation a good predictor of self-rated health in China?	y		1					0
xu2012	Investigation and Assessment on Perceive Air Quality of Dormitory Building	y		1					0
xu2018	Will boys' mental health fare worse under a hotter climate in Australia?	n							0														1															1
xue2019	Declines in mental health associated with air pollution and temperature variability in China	n							0														1		1										1			1
xue2019a	Author Correction: Declines in mental health associated with air pollution and temperature variability in China	y							1	correction
yackerson2014	The influence of air-suspended particulate concentration on the incidence of suicide attempts and exacerbation of schizophrenia	n							0																							1										1							1
yadiyal2020	Indian Mental Health Landscape :Where do women stand?	y							1	conference
yagi2016	Does social capital reduce child behavior problems? Results from the Great East Japan Earthquake follow-up for Children Study	n							0									1																				1									1
yang2010	Correlation Study between Indoor Air Pollution and Mental Health Status of Inhabitant	n							0
yang2019	The effect of urban green space on uncertainty stress and life stress: A nationwide study of university students in China	n							0																1																1
yau2018	Epidemiology of asphyxiation suicides in the United States, 2005-2014	y		1					0
yazd2019	Exploring the Drivers of Irrigator Mental Health in the Murray-Darling Basin, Australia	n							0					1	1																							1
yazd2020	Understanding the impacts of water scarcity and socio-economic demographics on farmer mental health in the Murray-Darling Basin	n							0					1							1																	1
yedlinsky2019	Care of the Military Veteran: Selected Health Issues	y		1					0
yi2018	Can Foster Care Interventions Diminish Justice System Inequality?	y		1					0
yim2013	The development of episodic memory: items, contexts, and relations	y		1					0
yim2020	The utility of smartphone-based, ecological momentary assessment for depressive symptoms	y		1					0
yoda2013	Mental health research for the 2011 flood affected people in Thailand	n							0
yohannessen2019	Health Assessment of Electronic Waste Workers in Chile: Participant Characterization	y		1					0
yolton2019	lifetime exposure to traffic-related air pollution and symptoms of depression and anxiety at age 12 years	n							0																							1											1			1
yoon2014	Occupational noise annoyance linked to depressive symptoms and suicidal ideation: a result from nationwide survey of Korea	n							0											1																						1	1
york2014	Social resources and disordered living conditions: evidence from a national sample of community-residing older adults	y		1					0
yu2016	Growing Pains: Changes in Psychological Well-Being in Urban China	y		1					0
yu2018	The effects of an activity-based lifestyle intervention on moderate sleep complaints among older adults: study protocol for a randomized controlled trial	y	1						0
yue2020	Association between ambient particulate matter and hospitalization for anxiety in China: A multicity case-crossover study	n							0																							1														1
zacks2020	Event Perception and Memory	y		1					0
zeller2015	Self-compassion in recovery following potentially traumatic stress: longitudinal study of at-risk youth	n							0															1																			1			1	1
zeng2017	The Application of Green Plants in the Interior Space	y	1	1					0
zenko2019	Linking Water Scarcity to Mental Health: Hydro-Social Interruptions in the Lake Urmia Basin, Iran	n							0					1																								1
zhang2016	The 'WikiGuidelines' smartphone application: Bridging the gaps in availability of evidence-based smartphone mental health applications	y		1					0
zhang2017a	Happiness in the Air: How Does a Dirty Sky Affect Mental Health and Subjective Well-being?	n							0																							1						1					1
zhang2018	The impact of exposure to air pollution on cognitive performance	n							0																							1
zhang2018b	The MJA-Lancet Countdown on health and climate change: Australian policy inaction threatens lives	y	1	1					0
zhang2019	Objectively-Measured Neighbourhood Attributes as Correlates and Moderators of Quality of Life in Older Adults with Different Living Arrangements: The ALECS Cross-Sectional Study	n							0																1
zhang2019a	Developmental changes in longitudinal associations between academic achievement and psychopathological symptoms from late childhood to middle adolescence	y		1					0
zhang2020b	Machine Learning Models for the Prediction of Postpartum Depression: Application and Comparison Based on a Cohort Study	y		1					0
zhao2020	Identification of risk factors for early psychiatric rehospitalization	y		1					0
zhou2019a	Mortality, morbidity, and risk factors in China and its provinces, 1990-2017: a systematic analysis for the Global Burden of Disease Study 2017	y		1					0
zhou2020a	Air Pollution and Mental Health of Older Adults in China	n							0																							1											1
zhu2020	Does the Presence of Birdsongs Improve Perceived Levels of Mental Restoration from Park Use? Experiments on Parkways of Harbin Sun Island in China	n							0											1					1
ziegler2017	Climate Change and Underserved Communities	y	1						0
ziegler2019	Climate Change and Underserved Communities	y							1	duplicate
zijlema2016	The association of air pollution and depressed mood in 70,928 individuals from four European cohorts	n							0											1												1											1
zijlema2017	The relationship between natural outdoor environments and cognitive functioning and its mediators	n							0																1
zock2018	The impact of social capital, land use, air pollution and noise on individual morbidity in Dutch neighbourhoods	n							0																1	1				1		1						1
zubaran2013	Aborigines, colonizers and newcomers: the landscape of transcultural psychiatry research in Australia	y		1					0
[truncated: 29 more columns]
