# Supplementary material for: The Contribution of Environmental Science to Mental Health Research: A Scoping Review
Source: Int J Environ Res Public Health. 2023 Mar 27;20(7):5278. doi: 10.3390/ijerph20075278 (PMC10094550; doi:10.3390/ijerph20075278)
Supplement: Supplementary file 1 [file ijerph-20-05278-s001.zip › Table S6 - Extraction Table - Supplementary Materials.xlsx]

## Sheet: Table S6
Full text screening and extraction of data for papers on contribution of environmental science to mental health research, carried out by MR, KI, MC and KC. Each line represents a single relationship between environmental science and mental health, therefore a single study may have multiple lines.
paper_id	study_type	population	sample_size	sample_recruitment	sample_recruitment_other	representative	geographical_location	disciplinary_field	study_design_lab	study_design_field	study_design_epidemiological	study_design_secondary	study_design_other	environmental_science_methods	environmental_science_measures	mental_health_methods	mental_health_measures	additional_variables	analysis_type	main_results	main_results_other	results_summary	future_research_methods	future_research_env_sci	future_research_mh	future_research_qu	interaction	Reject	Reject_reason	Comments
aerts2020	Quantiative	tree pollen allergy patients living in Flanders	88	Other	Unclear - sample is a geographic subset of that of a wider study. Link is provided but recruitment not detailed.	n	Flanders, Belgium	both	n	n	n	y	cross sectional survey design, mainly primary data but using some secondary environmental data	GIS Spatial databases - on plant distribution in region, on greenspace cover by vegetation height.	Greenspace area within 1 km of home (high vegetation and low vegetation)	Questionnaire based self report scale	psychological distress (GHQ-12)	gender, age, BMI, smoking status, freq of physical activity, commute distance, education level, health status (medication use, chronic respiritory disease), non-allergenic tree richness, cohort year	regression - GLM based on Poisson distribution with log-link function)	negative		psych distress was lower with increasing greenspace cover near home (both for low and high vegetation height greenspace) but perceived presence of allergenic tree species was associated with greater distress	Confirming allergy status using skin-prick or antibody tests				empirical	n		Also included a number of post-hoc comparison tests which I have not included as they don't add any more insights than that of the model
aerts2020	Quantiative	tree pollen allergy patients living in Flanders	88	Other	Unclear - sample is a geographic subset of that of a wider study. Link is provided but recruitment not detailed.	n	Flanders, Belgium	both	n	n	n	y	cross sectional survey design, mainly primary data but using some secondary environmental data	GIS Spatial databases - on plant distribution in region, on greenspace cover by vegetation height.	perceived presence of allergenic trees near residence (present/absent, proximity boundary undefined)	Questionnaire based self report scale	psychological distress (GHQ-12)	gender, age, BMI, smoking status, freq of physical activity, commute distance, education level, health status (medication use, chronic respiritory disease), non-allergenic tree richness, cohort year	regression - based on Poisson distribution with log-link function)	positive		psych distress was lower with increasing greenspace cover near home (both for low and high vegetation height greenspace) but perceived presence of allergenic tree species was associated with greater distress	Confirming allergy status using skin-prick or antibody tests				empirical	n		Also included a number of post-hoc comparison tests which I have not included as they don't add any more insights than that of the model
afifi2012	Quantiative	adult residents of the area	337	random		n	Santa Barbara, CA, USA	mh	n	y	n	n		natural disaster	experience of wildfire evacuation	phone survey	psychological distress Mental Health Inventory	communal coping, uncertainty, gender, age, ethnicity, language, primary support provider	Hierarchical regression	positive		Higher uncertainty in evacuated individuals. Higher uncertainty = higher distress in all individuals. Communal coping only reduced uncertainty, and therefore stress, in evacuated individuals.	Longtiudinal rather than cross sectional.	Split evacuation from trauma of wildfire.	Measure coping measures, including negatives. Measure chronic uncertainty rather than acute.		empirical	n
Agyapon2018	Quantiative	adult residents of the area	488	Other	residents randomly approached & invited to participate in study	n	Fort McMurray, Canada	mh	n	y	n	n	6-month post fire	natural disaster - wildfire	experience being evacuated	questionnaire	anxiety (GAD-7)	Socio: age, gender, employment status; Living situation: where live after fire, where live after fire relative to where lived before fire; Exposure: where located on day of evacuation, area of residence relative to destroyed prperties, witnessed burning of homse, fearful for their own/others lives, media watching/reading, home destroeyed, home got smoke damanged, suffered no loss of property/busi…	logistic regresssion	positive		Witness homes destroyed predicted greater likelihood of elevated anxiety	not discussed	not discussed	use doagnostic interview	not discussed	empirical	n
Agyapon2018	Quantiative	adult residents of the area	488	Other	residents randomly approached & invited to participate in study	n	Fort McMurray, Canada	mh	n	y	n	n	6-month post fire	natural disaster - wildfire	experience being evacuated	questionnaire	anxiety (GAD-7)	Socio: age, gender, employment status; Living situation: where live after fire, where live after fire relative to where lived before fire; Exposure: where located on day of evacuation, area of residence relative to destroyed prperties, witnessed burning of homse, fearful for their own/others lives, media watching/reading, home destroeyed, home got smoke damanged, suffered no loss of property/busi…	logistic regresssion	positive		Living in different home predicted greater likelihood of anxiety	not discussed	not discussed	use doagnostic interview	not discussed	empirical	n
Agyapon2018	Quantiative	adult residents of the area	488	Other	residents randomly approached & invited to participate in study	n	Fort McMurray, Canada	mh	n	y	n	n	6-month post fire	natural disaster - wildfire	experience being evacuated	questionnaire	anxiety (GAD-7)	Socio: age, gender, employment status; Living situation: where live after fire, where live after fire relative to where lived before fire; Exposure: where located on day of evacuation, area of residence relative to destroyed prperties, witnessed burning of homse, fearful for their own/others lives, media watching/reading, home destroeyed, home got smoke damanged, suffered no loss of property/busi…	logistic regresssion	positive		Pre-existing anxiety disorder predicted greater likelihood of elevated anxiety	not discussed	not discussed	use doagnostic interview	not discussed	empirical	n
Agyapon2018	Quantiative	adult residents of the area	488	Other	residents randomly approached & invited to participate in study	n	Fort McMurray, Canada	mh	n	y	n	n	6-month post fire	natural disaster - wildfire	experience being evacuated	questionnaire	anxiety (GAD-7)	Socio: age, gender, employment status; Living situation: where live after fire, where live after fire relative to where lived before fire; Exposure: where located on day of evacuation, area of residence relative to destroyed prperties, witnessed burning of homse, fearful for their own/others lives, media watching/reading, home destroeyed, home got smoke damanged, suffered no loss of property/busi…	logistic regresssion	negative		Perceived lower levels of support (govt/family) predicted greater likelihood of elevated anxiety	not discussed	not discussed	use doagnostic interview	not discussed	empirical	n
Agyapon2018	Quantiative	adult residents of the area	488	Other	residents randomly approached & invited to participate in study	n	Fort McMurray, Canada	mh	n	y	n	n	6-month post fire	natural disaster - wildfire	experience being evacuated	questionnaire	anxiety (GAD-7)	Socio: age, gender, employment status; Living situation: where live after fire, where live after fire relative to where lived before fire; Exposure: where located on day of evacuation, area of residence relative to destroyed prperties, witnessed burning of homse, fearful for their own/others lives, media watching/reading, home destroeyed, home got smoke damanged, suffered no loss of property/busi…	logistic regresssion	positive		Received counseling after wildfire predicted greater likelihood of elevated anxiety	not discussed	not discussed	use doagnostic interview	not discussed	empirical	n
Agyapon2018	Quantiative	adult residents of the area	488	Other	residents randomly approached & invited to participate in study	n	Fort McMurray, Canada	mh	n	y	n	n	6-month post fire	natural disaster - wildfire	experience being evacuated	questionnaire	Substance abuse - alcohol (Alcohol Use Disorder Identification Test (AUDIT)	Clinical History: pre-existing mental health condition, pre-existing use of psychotropic medication;	logistic regresssion			presence of GAD post-fire did not predict alcohol dependence	not discussed	not discussed	use doagnostic interview	not discussed	empirical	n
Agyapon2018	Quantiative	adult residents of the area	488	Other	residents randomly approached & invited to participate in study	n	Fort McMurray, Canada	mh	n	y	n	n	6-month post fire	natural disaster - wildfire	experience being evacuated	questionnaire	Substance abuse - drugs (Drug Use Diorder Identification Test (DUDIT)	Clinical History: pre-existing mental health condition, pre-existing use of psychotropic medication;	logistic regresssion			presence of GAD post-fire predicted drug-related problem	not discussed	not discussed	use doagnostic interview	not discussed	empirical	n
Agyapon2018	Quantiative	adult residents of the area	488	Other	residents randomly approached & invited to participate in study	n	Fort McMurray, Canada	mh	n	y	n	n	6-month post fire	natural disaster - wildfire	experience being evacuated	questionnaire	Substance abuse - cigaretts (Fagerstrom Test for Nicotine Dependence)	Clinical History: pre-existing mental health condition, pre-existing use of psychotropic medication;	logistic regresssion			presence of GAD post-fire did not predict nicotine dependence	not discussed	not discussed	use doagnostic interview	not discussed	empirical	n
Agyapon2018	Quantiative	adult residents of the area	486	random	check what we mean by random; possibly this is convenience?	n	Fort McMurray, Canada	mh	n	y	n	n		natural disaster	occurrence of wildfie	questionnaire	anxiety (GAD-7)											n
agyapong2020	quantitative	teaching staff	197	other	Its not a sample it is a census all 1466 staff sent questionnaire	n	Fort McMurray School District, Canada	mh	n	y	n	n	n	Presence of wildfire causing evacuation	Presence of wildfire causing evacuation	PHQ9	Major Depressive Disorder	sex, type of staff	statistical tests: p-values and Phi/Cramers V reported	positive		18 months after wildfires people presented with MDD if: they had been fearful for their lives and/or loved ones; receiving limited or no support from the Government; receiving counselling after Wildfires.	n/a	n/a	n/a	n/a	empirical	n
agyapong2020	quantitative	teaching staff	197	other	Its not a sample it is a census all 1466 staff sent questionnaire	n	Fort McMurray School District, Canada	mh	n	y	n	n	n	Presence of wildfire causing evacuation	Presence of wildfire causing evacuation	GAD-7	Generalised Anxiety Disorder		statistical tests: p-values and Phi/Cramers V reported	Positive		18 months after wildfires, people presented with GAD if they had a raised adverse childhood experience score, they witnessed their homes burning; they were fearful for their lives and/or those of loved ones; they had a high level of support from family/friends.	n/a	n/a	n/a	n/a	empirical	n
agyapong2020	quantitative	teaching staff	197	other	Its not a sample it is a census all 1466 staff sent questionnaire	n	Fort McMurray School District, Canada	mh	n	y	n	n	n	Presence of wildfire causing evacuation	Presence of wildfire causing evacuation	PTSD checklist for DSM-5	PTSD		statistical tests: p-values and Phi/Cramers V reported	Positive		18 months after wildfires people presented with PTSD if: the witnessed their homes burning; fearful for their lives and/or loved ones; receiving limited or no support from the Government; receiving counselling after Wildfires.	n/a	n/a	n/a	n/a	empirical	n
agyapong2020	quantitative	teaching staff	197	other	Its not a sample it is a census all 1466 staff sent questionnaire	n	Fort McMurray School District, Canada	mh	n	y	n	n	n	Presence of wildfire causing evacuation	Presence of wildfire causing evacuation	Alcohol User Disorder Identification Test		Men	statistical tests: p-values and Phi/Cramers V reported	Other		Men were found to drink more	n/a	n/a	n/a	n/a	empirical	n
agyapong2020	quantitative	teaching staff	197	other	Its not a sample it is a census all 1466 staff sent questionnaire	n	Fort McMurray School District, Canada	mh	n	y	n	n	n	Presence of wildfire causing evacuation	Presence of wildfire causing evacuation	Drug User Disorder Identification Test		Women	statistical tests: p-values and Phi/Cramers V reported	Other		Women were found to have "problematic drug use" not sure if this relates to legal or illegal drugs.	n/a	n/a	n/a	n/a	empirical	n
aiena2016	Quantiative	coastal residents (Mississippi, USA) directly affected by Deepwater Horizon oil spill and seeking MH support	1119	convenience (non-students)		n	Mississippi, USA	mh	n	y	n	n	cross sectional survey	None - pollution event (oil spill) as basis for sampling only	None - pollution event (oil spill) as basis for sampling only	Questionnaire based self report scale	PTSD (PCL-S version)	Resilience (RS-14); Purpose in Life (PIL-SF); perc. effect of the gulf oil spill (on financial situation, relationships, physical health);	regression - hierarchical linear regression	other	have put other because no env predictor variable	perceived effect of oil spill on individual +vely ass with PTSD scale; resilience -vely assoc with PTSD scale seemingly explained by purpose in life (-vely assoc with PTSD).	employ longitudinal design to better understand relationships and progression of distress and recovery		examine relationships in non-disaster affected samples too		composite	n		Also included a series of correlations and t-tests not included here as don't add anything extra
akhter2015	Qualitative	parents or teachers of children 0 to 8 years with experience of natural disaster. Children 5 to 10 years	4 interviews, 24 focus group, 17 children	Other	not stated, probably convience	n	Bhola, Shatkhira & Kurigram districts, Bangladesh	mh	n	y	n	n		flood, cyclone, waterlogging	experience of flood, cyclone, water logging	phenomeological and in-dpeth interviews, focus group discussions. Children via interview, short scripts and drawing	self reported trauma response		Analysis of trascripts and field notes, unclear exactly which approach taken	other	Descriptive, see results summary	Profound melancholy associated with disaster, as well as resulting from loss of life following disaster. Suggested as PTSD, but not measured					empirical	n
akter2019	Quantiative	children age 7-18 enrolled in school living in a houseold whose primary source of drinking water come from deep well	1035	Other	drawn from secondary data set that used multi-stage random sampling strategy to ensure representativeness of the population in 8 coastal districts; data collected through 3 waves (summer, wet and dry seaon) of 2014-2015 from households drawing water from deep well, shallow well, surface water, rain water and other	y	Bangladesh - southwest coastal region	mh	n	n	n	y	subsample from 3 wave study during 2014-2015	water sampling	salinity levels >1000 mg/l	cognitive development	likelihood to advance a grade in school	Child controls: age, gender, highest grade attained in 2014; Household controls: hh education, hh size, hh assets index, ag land size, size of homestead, weighted dietary diversity index, annual salt consumption, annual income, access to electricity, religion, distance from the minor river, distance frmo the school; Village controls: proportion adults ever enrolled in school, proportion of adults…	Linear probability regression model (an econometric model)	negative		on average, and all else constant, 7-18 yr old children exposed to salinity >100 mg/l were 12.2% points less likely to advance grade in 2015 than those who were exposed to salinity </= 1000 mg/l.	not discussed	not discussed	use indicators of cognitive ability such as IQ and proficiency gained at schoole (e.g. math, reading, writing test scores)	(i) Investigate if similar correlation between salinity & education outcome in southeastern coastal districts of Bangladesh?; (ii) test whether age and length of salinity expousre drive the difference in the effect of salinity across age groups	empirical	n		incluede effect modification results?
akter2019	Quantiative	children age 7-18 enrolled in school living in a houseold whose primary source of drinking water come from deep well	648	Other	drawn from secondary data set that used multi-stage random sampling strategy to ensure representativeness of the population in 8 coastal districts; data collected through 3 waves (summer, wet and dry seaon) of 2014-2015 from households drawing water from deep well, shallow well, surface water, rain water and other	y	Bangladesh - southwest coastal region	mh	n	n	n	y	subsample from 3 wave study during 2014-2015	water sampling	salinity levels >1000 mg/l	cognitive development	likelihood to advance a grade in school	Child controls: age, gender, highest grade attained in 2014; Household controls: hh education, hh size, hh assets index, ag land size, size of homestead, weighted dietary diversity index, annual salt consumption, annual income, access to electricity, religion, distance from the minor river, distance frmo the school; Village controls: proportion adults ever enrolled in school, proportion of adults…	Linear probability regression model (an econometric model)	negative		on average and all else equal, the adverse effect of salinity exposure on grade advancement is significant only for age group 7-12, i.e. children age 7-12 exposed to >1000 mg/l salinity less likely to advance than children of same age exposed to </= 1000 mg/l salinity	not discussed	not discussed	use indicators of cognitive ability such as IQ and proficiency gained at schoole (e.g. math, reading, writing test scores)	(i) Investigate if similar correlation between salinity & education outcome in southeastern coastal districts of Bangladesh?; (ii) test whether age and length of salinity expousre drive the difference in the effect of salinity across age groups	empirical	n
akter2019	Quantiative	children age 7-18 enrolled in school living in a houseold whose primary source of drinking water come from deep well	387	Other	drawn from secondary data set that used multi-stage random sampling strategy to ensure representativeness of the population in 8 coastal districts; data collected through 3 waves (summer, wet and dry seaon) of 2014-2015 from households drawing water from deep well, shallow well, surface water, rain water and other	y	Bangladesh - southwest coastal region	mh	n	n	n	y	subsample from 3 wave study during 2014-2015	water sampling	salinity levels >1000 mg/l	cognitive development	likelihood to advance a grade in school	Child controls: age, gender, highest grade attained in 2014; Household controls: hh education, hh size, hh assets index, ag land size, size of homestead, weighted dietary diversity index, annual salt consumption, annual income, access to electricity, religion, distance from the minor river, distance frmo the school; Village controls: proportion adults ever enrolled in school, proportion of adults…	Linear probability regression model (an econometric model)	null		no adverse effect of salinity exposure on grade advancement for 13-18 yr olds	not discussed	not discussed	use indicators of cognitive ability such as IQ and proficiency gained at schoole (e.g. math, reading, writing test scores)	(i) Investigate if similar correlation between salinity & education outcome in southeastern coastal districts of Bangladesh?; (ii) test whether age and length of salinity expousre drive the difference in the effect of salinity across age groups	empirical	n
al2011	quantitative	neighbourhoods in Kuwait	1467	random	volunteer distributors who were students of kuwait uni performed all surveys	y	Metropolitan Kuwait	both	n	y	n	n	n	measuring the equivalent sound level for local streets, collector streets, arterial roadways and freeways	noisy or quiet neighbourhoods	person-interview questionnaire survey including 36-item short-form health status	annoyance response	sex, age	multivariate statistical regression model	positive		Residents living in close proximity to noise streets showed a higher annoyance response rate, aas dudu residents experiencing higher levels of noise sensitivity.	n/a	n/a	n/a	n/a	empirical	n
al2011	quantitative	neighbourhoods in Kuwait	1467	random	volunteer distributors who were students of kuwait uni performed all surveys	y	Metropolitan Kuwait	both	n	y	n	n	n	measuring the equivalent sound level for local streets, collector streets, arterial roadways and freeways	noisy or quiet neighbourhoods	person-interview questionnaire survey including 36-item short-form health status	general health	sex, age	multivariate statistical regression model	positive		Residents living in quiet neighbourhoods scored higher for general health than those in noisy neighbourhoods	n/a	n/a	n/a	n/a	empirical	n
al2011	quantitative	neighbourhoods in Kuwait	1467	random	volunteer distributors who were students of kuwait uni performed all surveys	y	Metropolitan Kuwait	both	n	y	n	n	n	measuring the equivalent sound level for local streets, collector streets, arterial roadways and freeways	noisy or quiet neighbourhoods	person-interview questionnaire survey including 36-item short-form health status	sense of vitality	sex, age	multivariate statistical regression model	positive		Quiet neighbourhoods had higher scores for sense of vitality than noisy neighbourhoods	n/a	n/a	n/a	n/a	empirical	n
al2011	quantitative	neighbourhoods in Kuwait	1467	random	volunteer distributors who were students of kuwait uni performed all surveys	y	Metropolitan Kuwait	both	n	y	n	n	n	measuring the equivalent sound level for local streets, collector streets, arterial roadways and freeways	noisy or quiet neighbourhoods	person-interview questionnaire survey including 36-item short-form health status	mental health	sex, age	multivariate statistical regression model	positive		Quiet neighbourhoods had higher scores for mental health than noisy neighbourhoods	n/a	n/a	n/a	n/a	empirical	n
al2011	quantitative	neighbourhoods in Kuwait	1467	random	volunteer distributors who were students of kuwait uni performed all surveys	y	Metropolitan Kuwait	both	n	y	n	n	n	measuring the equivalent sound level for local streets, collector streets, arterial roadways and freeways	noisy or quiet neighbourhoods	person-interview questionnaire survey including 36-item short-form health status	stress	sex, age	multivariate statistical regression model	positive		Quiet neighbourhoods had lower scores for stress than noisy neighbourhoods	n/a	n/a	n/a	n/a	empirical	n
al2011	quantitative	neighbourhoods in Kuwait	1467	random	volunteer distributors who were students of kuwait uni performed all surveys	y	Metropolitan Kuwait	both	n	y	n	n	n	measuring the equivalent sound level for local streets, collector streets, arterial roadways and freeways	noisy or quiet neighbourhoods	person-interview questionnaire survey including 36-item short-form health status	role emotional	sex, age	multivariate statistical regression model	negative		There was no significant difference for role emotional in quieter or noisier neighbourhoods	n/a	n/a	n/a	n/a	empirical	n
al2011	quantitative	neighbourhoods in Kuwait	1467	random	volunteer distributors who were students of kuwait uni performed all surveys	y	Metropolitan Kuwait	both	n	y	n	n	n	measuring the equivalent sound level for local streets, collector streets, arterial roadways and freeways	noisy or quiet neighbourhoods	person-interview questionnaire survey including 36-item short-form health status	social functioning	sex, age	multivariate statistical regression model	negative		There was no significant difference for social functioning in quieter or noisier neighbourhoods	n/a	n/a	n/a	n/a	empirical	n
al2011	quantitative	neighbourhoods in Kuwait	1467	random	volunteer distributors who were students of kuwait uni performed all surveys	y	Metropolitan Kuwait	both	n	y	n	n	n	measuring the equivalent sound level for local streets, collector streets, arterial roadways and freeways	noisy or quiet neighbourhoods	person-interview questionnaire survey including 36-item short-form health status	bodily pain	sex, age	multivariate statistical regression model	negative		There was no significant difference for bodily pain in quieter or noisier neighbourhoods	n/a	n/a	n/a	n/a	empirical	n
al2011	quantitative	neighbourhoods in Kuwait	1467	random	volunteer distributors who were students of kuwait uni performed all surveys	y	Metropolitan Kuwait	both	n	y	n	n	n	measuring the equivalent sound level for local streets, collector streets, arterial roadways and freeways	noisy or quiet neighbourhoods	person-interview questionnaire survey including 36-item short-form health status	all health	sex, age	multivariate statistical regression model	positive		All health measures were significantly worse with lower mean scores for noisy than quieter neighbourhoods	n/a	n/a	n/a	n/a	empirical	n
alcock2015	Quantiative	Rural residents in England	2020	Other	Secondary analysis - doesn't detail sampling used in original survey (BHPS)	n	England	both	n	n	n	y	longitudinal panel survey	GIS database - land cover class, non-built (Land Cover Map 2007)	% broadleaved woodland cover	self report scales	GHQ-12 (reversed so = good mental health) between-individual effects	administrative region; area deprivation (vars for income, employment, education, crime inc separately); age; education; maritcal status; parenting status; household income; work-limiting health; labour market status; residental accommodation; commuting; fixed time effects.	regression - random effects	null		no sig relationships between % of land cover classes in area unit on GHQ between individuals		Use spatial data based on buffers around postcodes rather than LSOAs (which vary in size)			empirical	n
alcock2015	Quantiative	Rural residents in England	2020	Other	Secondary analysis - doesn't detail sampling used in original survey (BHPS)	n	England	both	n	n	n	y	longitudinal panel survey	GIS database - land cover class, non-built (Land Cover Map 2007)	% coniferious woodland cover	self report scales	GHQ-12 (reversed so = good mental health) between-individual effects	administrative region; area deprivation (vars for income, employment, education, crime inc separately); age; education; maritcal status; parenting status; household income; work-limiting health; labour market status; residental accommodation; commuting; fixed time effects.	regression - random effects	null		no sig relationships between % of land cover classes in area unit on GHQ between individuals		Use spatial data based on buffers around postcodes rather than LSOAs (which vary in size)			empirical	n
alcock2015	Quantiative	Rural residents in England	2020	Other	Secondary analysis - doesn't detail sampling used in original survey (BHPS)	n	England	both	n	n	n	y	longitudinal panel survey	GIS database - land cover class, non-built (Land Cover Map 2007)	% arable cover	self report scales	GHQ-12 (reversed so = good mental health) between-individual effects	administrative region; area deprivation (vars for income, employment, education, crime inc separately); age; education; maritcal status; parenting status; household income; work-limiting health; labour market status; residental accommodation; commuting; fixed time effects.	regression - random effects	null		no sig relationships between % of land cover classes in area unit on GHQ between individuals		Use spatial data based on buffers around postcodes rather than LSOAs (which vary in size)			empirical	n
alcock2015	Quantiative	Rural residents in England	2020	Other	Secondary analysis - doesn't detail sampling used in original survey (BHPS)	n	England	both	n	n	n	y	longitudinal panel survey	GIS database - land cover class, non-built (Land Cover Map 2007)	% improved grassland cover	self report scales	GHQ-12 (reversed so = good mental health) between-individual effects	administrative region; area deprivation (vars for income, employment, education, crime inc separately); age; education; maritcal status; parenting status; household income; work-limiting health; labour market status; residental accommodation; commuting; fixed time effects.	regression - random effects	null		no sig relationships between % of land cover classes in area unit on GHQ between individuals		Use spatial data based on buffers around postcodes rather than LSOAs (which vary in size)			empirical	n
alcock2015	Quantiative	Rural residents in England	2020	Other	Secondary analysis - doesn't detail sampling used in original survey (BHPS)	n	England	both	n	n	n	y	longitudinal panel survey	GIS database - land cover class, non-built (Land Cover Map 2007)	% semi-natural grassland cover	self report scales	GHQ-12 (reversed so = good mental health) between-individual effects	administrative region; area deprivation (vars for income, employment, education, crime inc separately); age; education; maritcal status; parenting status; household income; work-limiting health; labour market status; residental accommodation; commuting; fixed time effects.	regression - random effects	null		no sig relationships between % of land cover classes in area unit on GHQ between individuals		Use spatial data based on buffers around postcodes rather than LSOAs (which vary in size)			empirical	n
alcock2015	Quantiative	Rural residents in England	2020	Other	Secondary analysis - doesn't detail sampling used in original survey (BHPS)	n	England	both	n	n	n	y	longitudinal panel survey	GIS database - land cover class, non-built (Land Cover Map 2007)	% mountain, heath and bog cover	self report scales	GHQ-12 (reversed so = good mental health) between-individual effects	administrative region; area deprivation (vars for income, employment, education, crime inc separately); age; education; maritcal status; parenting status; household income; work-limiting health; labour market status; residental accommodation; commuting; fixed time effects.	regression - random effects	null		no sig relationships between % of land cover classes in area unit on GHQ between individuals		Use spatial data based on buffers around postcodes rather than LSOAs (which vary in size)			empirical	n
alcock2015	Quantiative	Rural residents in England	2020	Other	Secondary analysis - doesn't detail sampling used in original survey (BHPS)	n	England	both	n	n	n	y	longitudinal panel survey	GIS database - land cover class, non-built (Land Cover Map 2007)	% saltwater cover	self report scales	GHQ-12 (reversed so = good mental health) between-individual effects	administrative region; area deprivation (vars for income, employment, education, crime inc separately); age; education; maritcal status; parenting status; household income; work-limiting health; labour market status; residental accommodation; commuting; fixed time effects.	regression - random effects	null		no sig relationships between % of land cover classes in area unit on GHQ between individuals		Use spatial data based on buffers around postcodes rather than LSOAs (which vary in size)			empirical	n
alcock2015	Quantiative	Rural residents in England	2020	Other	Secondary analysis - doesn't detail sampling used in original survey (BHPS)	n	England	both	n	n	n	y	longitudinal panel survey	GIS database - land cover class, non-built (Land Cover Map 2007)	% freshwater cover	self report scales	GHQ-12 (reversed so = good mental health) between-individual effects	administrative region; area deprivation (vars for income, employment, education, crime inc separately); age; education; maritcal status; parenting status; household income; work-limiting health; labour market status; residental accommodation; commuting; fixed time effects.	regression - random effects	null		no sig relationships between % of land cover classes in area unit on GHQ between individuals		Use spatial data based on buffers around postcodes rather than LSOAs (which vary in size)			empirical	n
alcock2015	Quantiative	Rural residents in England	2020	Other	Secondary analysis - doesn't detail sampling used in original survey (BHPS)	n	England	both	n	n	n	y	longitudinal panel survey	GIS database - land cover class, non-built (Land Cover Map 2007)	% coastal cover	self report scales	GHQ-12 (reversed so = good mental health) between-individual effects	administrative region; area deprivation (vars for income, employment, education, crime inc separately); age; education; maritcal status; parenting status; household income; work-limiting health; labour market status; residental accommodation; commuting; fixed time effects.	regression - random effects	null		no sig relationships between % of land cover classes in area unit on GHQ between individuals		Use spatial data based on buffers around postcodes rather than LSOAs (which vary in size)			empirical	n
alcock2015	Quantiative	Rural residents in England who moved from one rural area to another during the study	214	Other	Secondary analysis - doesn't detail sampling used in original survey (BHPS)	n	England	both	n	n	n	y	longitudinal panel survey	GIS database - land cover class, non-built (Land Cover Map 2007)	% broadleaved woodland cover	self report scales	GHQ-12 (reversed so = good mental health) within-individual effects	administrative region; area deprivation (vars for income, employment, education, crime inc separately); age; education; maritcal status; parenting status; household income; work-limiting health; labour market status; residental accommodation; commuting; fixed time effects.	regression - random effects	null		no sig effect of moving to area with more broadleaved woodland		Use spatial data based on buffers around postcodes rather than LSOAs (which vary in size)			empirical	n
alcock2015	Quantiative	Rural residents in England who moved from one rural area to another during the study	214	Other	Secondary analysis - doesn't detail sampling used in original survey (BHPS)	n	England	both	n	n	n	y	longitudinal panel survey	GIS database - land cover class, non-built (Land Cover Map 2007)	% coniferious woodland cover	self report scales	GHQ-12 (reversed so = good mental health) within-individual effects	administrative region; area deprivation (vars for income, employment, education, crime inc separately); age; education; maritcal status; parenting status; household income; work-limiting health; labour market status; residental accommodation; commuting; fixed time effects.	regression - random effects	null		no sig effect of moving to area with more coniferous woodland		Use spatial data based on buffers around postcodes rather than LSOAs (which vary in size)			empirical	n
alcock2015	Quantiative	Rural residents in England who moved from one rural area to another during the study	214	Other	Secondary analysis - doesn't detail sampling used in original survey (BHPS)	n	England	both	n	n	n	y	longitudinal panel survey	GIS database - land cover class, non-built (Land Cover Map 2007)	% arable cover	self report scales	GHQ-12 (reversed so = good mental health) within-individual effects	administrative region; area deprivation (vars for income, employment, education, crime inc separately); age; education; maritcal status; parenting status; household income; work-limiting health; labour market status; residental accommodation; commuting; fixed time effects.	regression - random effects	positive		positive MH effect of moving to area with more arable		Use spatial data based on buffers around postcodes rather than LSOAs (which vary in size)			empirical	n
alcock2015	Quantiative	Rural residents in England who moved from one rural area to another during the study	214	Other	Secondary analysis - doesn't detail sampling used in original survey (BHPS)	n	England	both	n	n	n	y	longitudinal panel survey	GIS database - land cover class, non-built (Land Cover Map 2007)	% improved grassland cover	self report scales	GHQ-12 (reversed so = good mental health) within-individual effects	administrative region; area deprivation (vars for income, employment, education, crime inc separately); age; education; maritcal status; parenting status; household income; work-limiting health; labour market status; residental accommodation; commuting; fixed time effects.	regression - random effects	positive		positive MH effect of moving to area with more improved grassland		Use spatial data based on buffers around postcodes rather than LSOAs (which vary in size)			empirical	n
alcock2015	Quantiative	Rural residents in England who moved from one rural area to another during the study	214	Other	Secondary analysis - doesn't detail sampling used in original survey (BHPS)	n	England	both	n	n	n	y	longitudinal panel survey	GIS database - land cover class, non-built (Land Cover Map 2007)	% semi-natural grassland cover	self report scales	GHQ-12 (reversed so = good mental health) within-individual effects	administrative region; area deprivation (vars for income, employment, education, crime inc separately); age; education; maritcal status; parenting status; household income; work-limiting health; labour market status; residental accommodation; commuting; fixed time effects.	regression - random effects	positive		positive MH effect of moving to area with more seminatural grassland		Use spatial data based on buffers around postcodes rather than LSOAs (which vary in size)			empirical	n
alcock2015	Quantiative	Rural residents in England who moved from one rural area to another during the study	214	Other	Secondary analysis - doesn't detail sampling used in original survey (BHPS)	n	England	both	n	n	n	y	longitudinal panel survey	GIS database - land cover class, non-built (Land Cover Map 2007)	% mountain, heath and bog cover	self report scales	GHQ-12 (reversed so = good mental health) within-individual effects	administrative region; area deprivation (vars for income, employment, education, crime inc separately); age; education; maritcal status; parenting status; household income; work-limiting health; labour market status; residental accommodation; commuting; fixed time effects.	regression - random effects	positive		positive MH effect of moving to area with more mountain, heath and bog		Use spatial data based on buffers around postcodes rather than LSOAs (which vary in size)			empirical	n
alcock2015	Quantiative	Rural residents in England who moved from one rural area to another during the study	214	Other	Secondary analysis - doesn't detail sampling used in original survey (BHPS)	n	England	both	n	n	n	y	longitudinal panel survey	GIS database - land cover class, non-built (Land Cover Map 2007)	% saltwater cover	self report scales	GHQ-12 (reversed so = good mental health) within-individual effects	administrative region; area deprivation (vars for income, employment, education, crime inc separately); age; education; maritcal status; parenting status; household income; work-limiting health; labour market status; residental accommodation; commuting; fixed time effects.	regression - random effects	negative		negative MH effect of moving to area with more saltwater cover		Use spatial data based on buffers around postcodes rather than LSOAs (which vary in size)			empirical	n
alcock2015	Quantiative	Rural residents in England who moved from one rural area to another during the study	214	Other	Secondary analysis - doesn't detail sampling used in original survey (BHPS)	n	England	both	n	n	n	y	longitudinal panel survey	GIS database - land cover class, non-built (Land Cover Map 2007)	% freshwater cover	self report scales	GHQ-12 (reversed so = good mental health) within-individual effects	administrative region; area deprivation (vars for income, employment, education, crime inc separately); age; education; maritcal status; parenting status; household income; work-limiting health; labour market status; residental accommodation; commuting; fixed time effects.	regression - random effects	null		no sig effect of moving to area with more freshwater cover		Use spatial data based on buffers around postcodes rather than LSOAs (which vary in size)			empirical	n
alcock2015	Quantiative	Rural residents in England who moved from one rural area to another during the study	214	Other	Secondary analysis - doesn't detail sampling used in original survey (BHPS)	n	England	both	n	n	n	y	longitudinal panel survey	GIS database - land cover class, non-built (Land Cover Map 2007)	% coastal cover	self report scales	GHQ-12 (reversed so = good mental health) within-individual effects	administrative region; area deprivation (vars for income, employment, education, crime inc separately); age; education; maritcal status; parenting status; household income; work-limiting health; labour market status; residental accommodation; commuting; fixed time effects.	regression - random effects	positive		positive MH effect of moving to area with more mountain, heath and bog		Use spatial data based on buffers around postcodes rather than LSOAs (which vary in size)			empirical	n
almendra2019	Quantiative	hospital admissions	30139	Other	Hospital admissions	y	Lisbon, Portugal	mh	n	y	y	n		temperature (7 day lag)	National Climate data centre	Hospital admissions	mental health diagnosis	time, day of week, sex, age, humidity, PM10, Ozone	generalised additive model	positive		Increased admissions temp over 30 on day of exposure, and 27 degress with 0 to 2 day lag. Lower admissions for days in 1st percentile temp compared to 50th percentile. When stratified by sex higher admittance for women on days with 99th percentile temperature, with lag of 0 to 4 days, and lower admittance at 1st percentile temperatures with lag of 0 to 6 days.						n
aloufi2019																												y	Review
andreucci2019																												y	Discussion piece/review - no original research
aschengrau2016	Quantiative	People born (between 1969 and 1983) to women in towns with types of water pipes linked to contamination with tetrachloroethylene (PCE), plus some of their siblings	1689	systematic	Invited all 'exposed' residents to participate, plus a randomly sampled group of 'unexposed' matched to the exposed group on month and year of birth	n	Cape Cod, Massachusetts USA	both	n	y	y	n	retrospective cohort study	Historical maps of pipe distribution network; leaching and transport model to determine exposure designation.	Estimated PCE exposure during prenatal and childhood period (up to 5 years)	questionnaire	PTSD occurrence (how measured?)	demographic characteristics, key risk factors for behavioural and health outcomes, nondrinking water sources of solvent exposure (no more detail given on these)	Not stated what model used. Reports Risk Ratios	positive		Exposure to PCE during gestation and early childhood increased risk of PTSD					methodological	n		Review of findings within a large study - some details omitted in paper.
aschengrau2016	Quantiative	People born (between 1969 and 1983) to women in towns with types of water pipes linked to contamination with tetrachloroethylene (PCE), plus some of their siblings	1689	systematic	Invited all 'exposed' residents to participate, plus a randomly sampled group of 'unexposed' matched to the exposed group on month and year of birth	n	Cape Cod, Massachusetts USA	both	n	y	y	n	retrospective cohort study	Historical maps of pipe distribution network; leaching and transport model to determine exposure designation.	Estimated PCE exposure during prenatal and childhood period (up to 5 years)	questionnaire	Depression occurrence (how measured?)	demographic characteristics, key risk factors for behavioural and health outcomes, nondrinking water sources of solvent exposure (no more detail given on these)	Not stated what model used. Reports Risk Ratios	null		Exposure to PCE during gestation and early childhood not associated with risk of depression					methodological	n		Review of findings within a large study - some details omitted in paper.
aschengrau2016	Quantiative	People born (between 1969 and 1983) to women in towns with types of water pipes linked to contamination with tetrachloroethylene (PCE), plus some of their siblings	1689	systematic	Invited all 'exposed' residents to participate, plus a randomly sampled group of 'unexposed' matched to the exposed group on month and year of birth	n	Cape Cod, Massachusetts USA	both	n	y	y	n	retrospective cohort study	Historical maps of pipe distribution network; leaching and transport model to determine exposure designation.	Estimated PCE exposure during prenatal and childhood period (up to 5 years)	questionnaire	bipolar disorder occurrence (how measured?)	demographic characteristics, key risk factors for behavioural and health outcomes, nondrinking water sources of solvent exposure (no more detail given on these)	Not stated what model used. Reports Risk Ratios	positive		Exposure to PCE during gestation and early childhood increased risk of bipolar					methodological	n		Review of findings within a large study - some details omitted in paper.
aschengrau2016	Quantiative	People born (between 1969 and 1983) to women in towns with types of water pipes linked to contamination with tetrachloroethylene (PCE), plus some of their siblings	1689	systematic	Invited all 'exposed' residents to participate, plus a randomly sampled group of 'unexposed' matched to the exposed group on month and year of birth	n	Cape Cod, Massachusetts USA	both	n	y	y	n	retrospective cohort study	Historical maps of pipe distribution network; leaching and transport model to determine exposure designation.	Estimated PCE exposure during prenatal and childhood period (up to 5 years)	questionnaire	schizophrenia occurrence (how measured?)	demographic characteristics, key risk factors for behavioural and health outcomes, nondrinking water sources of solvent exposure (no more detail given on these)	Not stated what model used. Reports Risk Ratios	other	States that schizophrenia occurrence was too rare to produce reliable conclusions						methodological	n		Review of findings within a large study - some details omitted in paper.
aschengrau2016	Quantiative	People born (between 1969 and 1983) to women in towns with types of water pipes linked to contamination with tetrachloroethylene (PCE), plus some of their siblings	63	systematic	Subset of participants who returned questionnaire (results of which in separate lines)	n	Cape Cod, Massachusetts USA	both	y	n	y	n	retrospective cohort study	Historical maps of pipe distribution network; leaching and transport model to determine exposure designation.	Estimated PCE exposure during prenatal and childhood period (up to 5 years)	clinical neuropsychological testing	visuopatial function tasks	demographic characteristics, key risk factors for behavioural and health outcomes, nondrinking water sources of solvent exposure (no more detail given on these)	Not stated	negative		Higher exposure moderately associated with lower cognitive functioning on this measure					methodological	n		Review of findings within a large study - some details omitted in paper. Have included these measures because the focus is on cognitive testing so I'm thinking it fits within cognitive development and decline
aschengrau2016	Quantiative	People born (between 1969 and 1983) to women in towns with types of water pipes linked to contamination with tetrachloroethylene (PCE), plus some of their siblings	63	systematic	Subset of participants who returned questionnaire (results of which in separate lines)	n	Cape Cod, Massachusetts USA	both	y	n	y	n	retrospective cohort study	Historical maps of pipe distribution network; leaching and transport model to determine exposure designation.	Estimated PCE exposure during prenatal and childhood period (up to 5 years)	clinical neuropsychological testing	motor functioning (Neurobehvaioural Evalaution System finger tapping)	demographic characteristics, key risk factors for behavioural and health outcomes, nondrinking water sources of solvent exposure (no more detail given on these)	Not stated	negative		Higher exposure moderately associated with lower cognitive functioning on this measure					methodological	n		Review of findings within a large study - some details omitted in paper. Have included these measures because the focus is on cognitive testing so I'm thinking it fits within cognitive development and decline
aschengrau2016	Quantiative	People born (between 1969 and 1983) to women in towns with types of water pipes linked to contamination with tetrachloroethylene (PCE), plus some of their siblings	63	systematic	Subset of participants who returned questionnaire (results of which in separate lines)	n	Cape Cod, Massachusetts USA	both	y	n	y	n	retrospective cohort study	Historical maps of pipe distribution network; leaching and transport model to determine exposure designation.	Estimated PCE exposure during prenatal and childhood period (up to 5 years)	clinical neuropsychological testing	learning and memory	demographic characteristics, key risk factors for behavioural and health outcomes, nondrinking water sources of solvent exposure (no more detail given on these)	Not stated	negative		Higher exposure moderately associated with lower cognitive functioning on this measure					methodological	n		Review of findings within a large study - some details omitted in paper. Have included these measures because the focus is on cognitive testing so I'm thinking it fits within cognitive development and decline
aschengrau2016	Quantiative	People born (between 1969 and 1983) to women in towns with types of water pipes linked to contamination with tetrachloroethylene (PCE), plus some of their siblings	63	systematic	Subset of participants who returned questionnaire (results of which in separate lines)	n	Cape Cod, Massachusetts USA	both	y	n	y	n	retrospective cohort study	Historical maps of pipe distribution network; leaching and transport model to determine exposure designation.	Estimated PCE exposure during prenatal and childhood period (up to 5 years)	clinical neuropsychological testing	attention and executive function	demographic characteristics, key risk factors for behavioural and health outcomes, nondrinking water sources of solvent exposure (no more detail given on these)	Not stated	negative		Higher exposure moderately associated with lower cognitive functioning on this measure					methodological	n		Review of findings within a large study - some details omitted in paper. Have included these measures because the focus is on cognitive testing so I'm thinking it fits within cognitive development and decline
asnakew2019	Quantiative	survivors of Koshe landslide	830	random			Addis Ababa, Ethiopia	mh	n	y	n	n	n	Landslide	experience of landslide	interview	PTSD checklist	age, sex, maritial status, ethnicity, religion, educational, occupation, family and personal history of mental illness, childhood trauma, percived life threat, alcohol comsumption, smoking, khat chewing, social support, stressful life events	logistic regression	positive		High prevenlence of PTSD, but no comparator					empirical	n
austin2018	Quantiative	farmers (people who live or work on a farm)	235 who completed all 3 waves of survey	Other	cohort sample from Australian Rural Mental Health Study - all individuals who completed baseline (2007), yr 3 (2010) and yr 5 (2013)	n	Australia - New South Wales	mh	n	n	n	y	longitudinal cross sectional	experience of meteorological drought	Wet v Dry conditions (compare rainfall during 12 months preceding the month in which survey completed with the longterm average)	self report mental health	personal drought-related stress (PDS)	physical health, health service use, neuroticism, adverse life events, social support, marital status, sense of community, remoteness	multivariat linear regression in the generalised estimating equations (GEE) framework - a negative binomial model with log link and multivariate adjustments was applied	positive		incidence of PDS lower following mild wet periods	not discussed	impact of other types of drought (hydrological, agricultural)	not discussed	Investigation of modulators of drought-related stress could inform community-based strategies for allevieating stress, promote drought preparedness, guide community and government agencies providding support for people in rural areas	empirical	n
austin2018	Quantiative	individuals who live or work on a farm	236 who completed all 3 waves of survey	Other	cohort sample from secondary data who completed baseline (2007), yr 3 (2010) and yr 5 (2013)	n	Australia - New South Wales	mh	n	n	n	y	longitudinal cross sectional	spatial analysis of meteorological drought??	compare rainfall during 12 months preceding the month in which survey completed with the longterm average	self report mental health	community drought-related stress (CDS)	physical health, health service use, neuroticism, adverse life events, social support, marital status, sense of community, remoteness	multivariat linear regression in the generalised estimating equations (GEE) framework - a negative binomial model with log link and multivariate adjustments was applied	other	differs by drought condition	increased CDS following moderate dry and moderate wet weather; decreased following mild wet weather	not discussed	impact of other types of drought (hydrological, agricultural)	not discussed	Investigation of modulators of drought-related stress could inform community-based strategies for allevieating stress, promote drought preparedness, guide community and government agencies providding support for people in rural areas	empirical	n
austin2018	Quantiative	individuals who live or work on a farm	237 who completed all 3 waves of survey	Other	cohort sample from secondary data who completed baseline (2007), yr 3 (2010) and yr 5 (2013)	n	Australia - New South Wales	mh	n	n	n	y	longitudinal cross sectional	spatial analysis of meteorological drought??	compare rainfall during 12 months preceding the month in which survey completed with the longterm average	self report mental health	general psycholoigcal stress (K10)	physical health, health service use, neuroticism, adverse life events, social support, marital status, sense of community, remoteness	multivariat linear regression in the generalised estimating equations (GEE) framework - a negative binomial model with log link and multivariate adjustments was applied	positive		higher psyc stress following mild wet periods	not discussed	impact of other types of drought (hydrological, agricultural)	not discussed	Investigation of modulators of drought-related stress could inform community-based strategies for allevieating stress, promote drought preparedness, guide community and government agencies providding support for people in rural areas	empirical	n
ayer2019	Quantiative	Gulf of Mexico adults	2250	random		y	Gulf of Mexico	mh	n	y	n	n	n	Self reported oil spill exposure	Self reported oil spill exposure	Survey	Alcohol use disorders identification test	Gender, age, race, ethnicity, education, trauma history	linear regression	null					Include addtional exposure items		empirical	n
ayer2019	Quantiative	Gulf of Mexico adults	2250	random		y	Gulf of Mexico	mh	n	y	n	n	n	Self reported oil spill exposure	Self reported oil spill exposure	Survey	Depression - Patient health questionnaire	Gender, age, race, ethnicity, education, trauma history	linear regression	null					Include addtional exposure items		empirical	n
ayer2019	Quantiative	Gulf of Mexico adults	2250	random		y	Gulf of Mexico	mh	n	y	n	n	n	Self reported oil spill exposure	Self reported oil spill exposure	Survey	Generalised anxiety disorder screener	Gender, age, race, ethnicity, education, trauma history	linear regression	positive		More exposure to il spill related to more anxiety			Include addtional exposure items		empirical	n
ayer2019	Quantiative	Gulf of Mexico adults	2250	random		y	Gulf of Mexico	mh	n	y	n	n	n	Self reported oil spill exposure	Self reported oil spill exposure	Survey	Illness anxiety - Whiteley Index	Gender, age, race, ethnicity, education, trauma history	linear regression	positive		More exposure to il spill related to more anxiety			Include addtional exposure items		empirical	n
barreau2019	Quantiative	Households in 2 counties in California affected by drought	571	cluster	randomly selected clusters, systematic random sampling of households within selected clusters	n	California, USA	mh	n	y	n	n	cross sectional survey	None	None - only self report measures of perceived drought impacts (not exposure) e.g. household does not have running water, household had private well before drought, negative affected household finances, negatively affectived household property	questionnaire - CASPER (Community Assessments for Public Health Emergency Response)	Mental health outcomes - Negatively affected household peace of mind (no details on measure)		Logistic regression	other		No association between perceived impacts 'household does not have running water' on 'negatively affected peace of mind'. Those who reported 'household had private well before drought' 'negatively affected household finances' and 'negativity affected household property' were more likely to report outcome of 'negatively affected peace of mind'.					composite	n
barreau2019	Quantiative	Households in 2 counties in California affected by drought	571	cluster	randomly selected clusters, systematic random sampling of households within selected clusters	n	California, USA	mh	n	y	n	n	cross sectional survey	None	None - only self report measures of perceived drought impacts (not exposure) e.g. household does not have running water, household had private well before drought, negative affected household finances, negatively affectived household property	questionnaire - CASPER (Community Assessments for Public Health Emergency Response)	Mental health outcomes - worsening mental health condition (no details on measure)		Logistic regression	other		No association between any of the perceived impacts and 'worsening mental health condition'					composite	n
barreau2019	Quantiative	Households in 2 counties in California affected by drought	571	cluster	randomly selected clusters, systematic random sampling of households within selected clusters	n	California, USA	mh	n	y	n	n	cross sectional survey	None	None - only self report measures of perceived drought impacts (not exposure) e.g. household does not have running water, household had private well before drought, negative affected household finances, negatively affectived household property	questionnaire - CASPER (Community Assessments for Public Health Emergency Response)	Mental health outcomes - drought related acute stress in past 30 days (no details on measure)		Logistic regression	other		No association between perceived impacts 'household does not have running water' or 'household had private well before drought' on 'negatively affected peace of mind'. Those who reported 'household had 'negatively affected household finances' and 'negativity affected household property' were more likely to report outcome of 'drought related acute stress'.					composite	n
beecher2016	Quantiative	attendees at university counseling and psychological service centre		convenience (students)	Service users	n	Utah, USA	mh	n	n	n	y		weather station, EPA pollution reporting	Suntime 1 day average	Self report mental health	OQ-45 - psychological functioning		mixed models analysis	negative		Negative relationship to Q-45 indicates a negative relationship to mental distress, so better for mental health. Overall more sunlight is better.		Repeat in non-mountious area as this may have impacted pollution results. Differences in sun time due to latitude would be useful comparison			empirical	n
beecher2016	Quantiative	attendees at university counseling and psychological service centre		convenience (students)	Service users	n	Utah, USA	mh	n	n	n	y		weather station, EPA pollution reporting	Suntime 1 day average	Self report mental health	OQ-45 - sucicidal ideation only		mixed models analysis	negative	not significant	Negative relationship to Q-45 indicates a negative relationship to mental distress, so better for mental health. Overall more sunlight is better.		Repeat in non-mountious area as this may have impacted pollution results. Differences in sun time due to latitude would be useful comparison			empirical	n
beecher2016	Quantiative	attendees at university counseling and psychological service centre		convenience (students)	Service users	n	Utah, USA	mh	n	n	n	y		weather station, EPA pollution reporting	Suntime 7 day average	Self report mental health	OQ-45 - psychological functioning		mixed models analysis	negative		Negative relationship to Q-45 indicates a negative relationship to mental distress, so better for mental health. Overall more sunlight is better.		Repeat in non-mountious area as this may have impacted pollution results. Differences in sun time due to latitude would be useful comparison			empirical	n
beecher2016	Quantiative	attendees at university counseling and psychological service centre		convenience (students)	Service users	n	Utah, USA	mh	n	n	n	y		weather station, EPA pollution reporting	Suntime 7 day average	Self report mental health	OQ-45 - sucicidal ideation only		mixed models analysis	negative	not significant	Negative relationship to Q-45 indicates a negative relationship to mental distress, so better for mental health. Overall more sunlight is better.		Repeat in non-mountious area as this may have impacted pollution results. Differences in sun time due to latitude would be useful comparison			empirical	n
beecher2016	Quantiative	attendees at university counseling and psychological service centre		convenience (students)	Service users	n	Utah, USA	mh	n	n	n	y		weather station, EPA pollution reporting	Sunset hours (1 day average)	Self report mental health	OQ-45 - psychological functioning		mixed models analysis	negative		Negative relationship to Q-45 indicates a negative relationship to mental distress, so better for mental health. Overall more sunlight is better.		Repeat in non-mountious area as this may have impacted pollution results. Differences in sun time due to latitude would be useful comparison			empirical	n
beecher2016	Quantiative	attendees at university counseling and psychological service centre		convenience (students)	Service users	n	Utah, USA	mh	n	n	n	y		weather station, EPA pollution reporting	Sunset hours (1 day average)	Self report mental health	OQ-45 - sucicidal ideation only		mixed models analysis	negative	not significant	Negative relationship to Q-45 indicates a negative relationship to mental distress, so better for mental health. Overall more sunlight is better.		Repeat in non-mountious area as this may have impacted pollution results. Differences in sun time due to latitude would be useful comparison			empirical	n
beecher2016	Quantiative	attendees at university counseling and psychological service centre		convenience (students)	Service users	n	Utah, USA	mh	n	n	n	y		weather station, EPA pollution reporting	Sunset hours (7 day average)	Self report mental health	OQ-45 - psychological functioning		mixed models analysis	negative		Negative relationship to Q-45 indicates a negative relationship to mental distress, so better for mental health. Overall more sunlight is better.		Repeat in non-mountious area as this may have impacted pollution results. Differences in sun time due to latitude would be useful comparison			empirical	n
beecher2016	Quantiative	attendees at university counseling and psychological service centre		convenience (students)	Service users	n	Utah, USA	mh	n	n	n	y		weather station, EPA pollution reporting	Sunset hours (7 day average)	Self report mental health	OQ-45 - sucicidal ideation only		mixed models analysis	negative	not significant	Negative relationship to Q-45 indicates a negative relationship to mental distress, so better for mental health. Overall more sunlight is better.		Repeat in non-mountious area as this may have impacted pollution results. Differences in sun time due to latitude would be useful comparison			empirical	n
beecher2016	Quantiative	attendees at university counseling and psychological service centre		convenience (students)	Service users	n	Utah, USA	mh	n	n	n	y		weather station, EPA pollution reporting	Sunrise hours (1 day average)	Self report mental health	OQ-45 - psychological functioning		mixed models analysis	positive		Postive relationship to Q-45 indicates a postive relationship to mental distress, so worse for mental health. Overall more sunlight is better.		Repeat in non-mountious area as this may have impacted pollution results. Differences in sun time due to latitude would be useful comparison			empirical	n
beecher2016	Quantiative	attendees at university counseling and psychological service centre		convenience (students)	Service users	n	Utah, USA	mh	n	n	n	y		weather station, EPA pollution reporting	Sunrise hours (1 day average)	Self report mental health	OQ-45 - sucicidal ideation only		mixed models analysis	positive	not significant	Postive relationship to Q-45 indicates a postive relationship to mental distress, so worse for mental health. Overall more sunlight is better.		Repeat in non-mountious area as this may have impacted pollution results. Differences in sun time due to latitude would be useful comparison			empirical	n
beecher2016	Quantiative	attendees at university counseling and psychological service centre		convenience (students)	Service users	n	Utah, USA	mh	n	n	n	y		weather station, EPA pollution reporting	Sunrise hours (7 day average)	Self report mental health	OQ-45 - psychological functioning		mixed models analysis	positive		Postive relationship to Q-45 indicates a postive relationship to mental distress, so worse for mental health. Overall more sunlight is better.		Repeat in non-mountious area as this may have impacted pollution results. Differences in sun time due to latitude would be useful comparison			empirical	n
beecher2016	Quantiative	attendees at university counseling and psychological service centre		convenience (students)	Service users	n	Utah, USA	mh	n	n	n	y		weather station, EPA pollution reporting	Sunrise hours (7 day average)	Self report mental health	OQ-45 - sucicidal ideation only		mixed models analysis	positive	not significant	Postive relationship to Q-45 indicates a postive relationship to mental distress, so worse for mental health. Overall more sunlight is better.		Repeat in non-mountious area as this may have impacted pollution results. Differences in sun time due to latitude would be useful comparison			empirical	n
beecher2016	Quantiative	attendees at university counseling and psychological service centre		convenience (students)	Service users	n	Utah, USA	mh	n	n	n	y		weather station, EPA pollution reporting	Irradiance (1 day average)	Self report mental health	OQ-45 - psychological functioning		mixed models analysis	negative		Negative relationship to Q-45 indicates a negative relationship to mental distress, so better for mental health		Repeat in non-mountious area as this may have impacted pollution results. Differences in sun time due to latitude would be useful comparison			empirical	n
beecher2016	Quantiative	attendees at university counseling and psychological service centre		convenience (students)	Service users	n	Utah, USA	mh	n	n	n	y		weather station, EPA pollution reporting	Irradiance (1 day average)	Self report mental health	OQ-45 - sucicidal ideation only		mixed models analysis	negative	not significant	Negative relationship to Q-45 indicates a negative relationship to mental distress, so better for mental health		Repeat in non-mountious area as this may have impacted pollution results. Differences in sun time due to latitude would be useful comparison			empirical	n
beecher2016	Quantiative	attendees at university counseling and psychological service centre		convenience (students)	Service users	n	Utah, USA	mh	n	n	n	y		weather station, EPA pollution reporting	Irradiance (7 day average)	Self report mental health	OQ-45 - psychological functioning		mixed models analysis	negative		Negative relationship to Q-45 indicates a negative relationship to mental distress, so better for mental health		Repeat in non-mountious area as this may have impacted pollution results. Differences in sun time due to latitude would be useful comparison			empirical	n
beecher2016	Quantiative	attendees at university counseling and psychological service centre		convenience (students)	Service users	n	Utah, USA	mh	n	n	n	y		weather station, EPA pollution reporting	Irriadiance (7 day average)	Self report mental health	OQ-45 - sucicidal ideation only		mixed models analysis	negative	not significant	Negative relationship to Q-45 indicates a negative relationship to mental distress, so better for mental health		Repeat in non-mountious area as this may have impacted pollution results. Differences in sun time due to latitude would be useful comparison			empirical	n
beecher2016	Quantiative	attendees at university counseling and psychological service centre		convenience (students)	Service users	n	Utah, USA	mh	n	n	n	y		weather station, EPA pollution reporting	Ozone (1h average)	Self report mental health	OQ-45 - psychological functioning		mixed models analysis	negative		Negative relationship to Q-45 indicates a negative relationship to mental distress, so better for mental health		Repeat in non-mountious area as this may have impacted pollution results. Differences in sun time due to latitude would be useful comparison			empirical	n
beecher2016	Quantiative	attendees at university counseling and psychological service centre		convenience (students)	Service users	n	Utah, USA	mh	n	n	n	y		weather station, EPA pollution reporting	Ozone (1h average)	Self report mental health	OQ-45 - sucicidal ideation only		mixed models analysis	negative	not significant	Negative relationship to Q-45 indicates a negative relationship to mental distress, so better for mental health		Repeat in non-mountious area as this may have impacted pollution results. Differences in sun time due to latitude would be useful comparison			empirical	n
beecher2016	Quantiative	attendees at university counseling and psychological service centre		convenience (students)	Service users	n	Utah, USA	mh	n	n	n	y		weather station, EPA pollution reporting	Ozone (4h average)	Self report mental health	OQ-45 - psychological functioning		mixed models analysis	negative		Negative relationship to Q-45 indicates a negative relationship to mental distress, so better for mental health		Repeat in non-mountious area as this may have impacted pollution results. Differences in sun time due to latitude would be useful comparison			empirical	n
beecher2016	Quantiative	attendees at university counseling and psychological service centre		convenience (students)	Service users	n	Utah, USA	mh	n	n	n	y		weather station, EPA pollution reporting	Ozone (4h average)	Self report mental health	OQ-45 - sucicidal ideation only		mixed models analysis	negative	not significant	Negative relationship to Q-45 indicates a negative relationship to mental distress, so better for mental health		Repeat in non-mountious area as this may have impacted pollution results. Differences in sun time due to latitude would be useful comparison			empirical	n
beecher2016	Quantiative	attendees at university counseling and psychological service centre		convenience (students)	Service users	n	Utah, USA	mh	n	n	n	y		weather station, EPA pollution reporting	Ozone (1 day average)	Self report mental health	OQ-45 - psychological functioning		mixed models analysis	negative		Negative relationship to Q-45 indicates a negative relationship to mental distress, so better for mental health		Repeat in non-mountious area as this may have impacted pollution results. Differences in sun time due to latitude would be useful comparison			empirical	n
beecher2016	Quantiative	attendees at university counseling and psychological service centre		convenience (students)	Service users	n	Utah, USA	mh	n	n	n	y		weather station, EPA pollution reporting	Ozone (1 day average)	Self report mental health	OQ-45 - sucicidal ideation only		mixed models analysis	negative	not significant	Negative relationship to Q-45 indicates a negative relationship to mental distress, so better for mental health		Repeat in non-mountious area as this may have impacted pollution results. Differences in sun time due to latitude would be useful comparison			empirical	n
beecher2016	Quantiative	attendees at university counseling and psychological service centre		convenience (students)	Service users	n	Utah, USA	mh	n	n	n	y		weather station, EPA pollution reporting	Ozone (7 day average)	Self report mental health	OQ-45 - psychological functioning		mixed models analysis	negative		Negative relationship to Q-45 indicates a negative relationship to mental distress, so better for mental health		Repeat in non-mountious area as this may have impacted pollution results. Differences in sun time due to latitude would be useful comparison			empirical	n
beecher2016	Quantiative	attendees at university counseling and psychological service centre		convenience (students)	Service users	n	Utah, USA	mh	n	n	n	y		weather station, EPA pollution reporting	Ozone (7 day average)	Self report mental health	OQ-45 - sucicidal ideation only		mixed models analysis	negative	not significant	Negative relationship to Q-45 indicates a negative relationship to mental distress, so better for mental health		Repeat in non-mountious area as this may have impacted pollution results. Differences in sun time due to latitude would be useful comparison			empirical	n
belleville2019	Mixed	evacuees from 2016 Fort McMurray Wildfiles	379	Other	Recruited via: public places, distribution of invites on business cards, local radio broadcast; snowballing	n	Canada - Alberta	mh	n	y	n	n	cross secctionanal at 3 months post fire	natural disaster - wildfire	experience being evacuated	online questionnaire	PTSD symptom checklist (PCL-5)	gender, age, mental health disorders of depression, anxietiy, alcohol, eating, somatoform during past 4 weeks (Patient Health Questionnaire, Insomnia Severity Index, Pittsburgh Sleep Quality Index & its addendum for PTSD which assesses frequency of trauma related sleep disturbances, Post-Traumatic Cognitions Inventory (Negative thoughts about self, about the world/others, self-blame), Ways of Cop…	Hierarchical multiple regression with PTSD symptom severity (PCL-5) as the predicted variable	positive	no comparator	significant factors associated with PTSD included depressive symptoms, trauma-related sleep disturbances, post-traumatic cognitions (perceiving other people or the world as untrustworthy or dangerous), insomnia symptoms, avoidance-based coping strategies, problem-solving/reappraisal coping strategies	not discussed	not discussed	not discussed	longitudinal assessment of impact	empirical	n
belleville2019	Mixed	evacuees from 2016 Fort McMurray Wildfiles	55	Other	subsample of q'naire + snowball	n	Canada - Alberta	mh	n	y	n	n	cross secctionanal at 3 months post fire	natural disaster - wildfire	experience being evacuated	diagnostic interview - psychiatric/psychological	PTSD (Clinician-Administered PTSD Scale [CAPS])	gender, age, married, children, residence status, employment pre-fire, change in work since fire	descriptive	positive	no comparator	29% met clinical diagnostic criteria for PTSD	not discussed	not discussed	not discussed	longitudinal assessment of impact	empirical	n
belleville2019	Mixed	evacuees from 2016 Fort McMurray Wildfiles	55	Other	subsample of q'naire + snowball	n	Canada - Alberta	mh	n	y	n	n	cross secctionanal at 3 months post fire	natural disaster - wildfire	experience being evacuated	diagnostic interview - psychiatric/psychological	major depression disorder (Mini International Neuropsychiatric Interview [MINI])	gender, age, married, children, residence status, employment pre-fire, change in work since fire	descriptive	positive	no comparator	25.5% met clincial diagnostic criteria for major depression disorder	not discussed	not discussed	not discussed	longitudinal assessment of impact	empirical	n
belleville2019	Mixed	evacuees from 2016 Fort McMurray Wildfiles	55	Other	subsample of q'naire + snowball	n	Canada - Alberta	mh	n	y	n	n	cross secctionanal at 3 months post fire	natural disaster - wildfire	experience being evacuated	diagnostic interview - psychiatric/psychological	Anxiety disorders (MINI)	gender, age, married, children, residence status, employment pre-fire, change in work since fire	descriptive	positive	no comparator	panic and generalised most frequently diagnosed	not discussed	not discussed	not discussed	longitudinal assessment of impact	empirical	n
belleville2019	Mixed	evacuees from 2016 Fort McMurray Wildfiles	55	Other	subsample of q'naire + snowball	n	Canada - Alberta	mh	n	y	n	n	cross secctionanal at 3 months post fire	natural disaster - wildfire	experience being evacuated	diagnostic interview - psychiatric/psychological	Substance use disosrders (MINI)	gender, age, married, children, residence status, employment pre-fire, change in work since fire	descriptive	positive	no comparator	16.7% diagnosed with drug use disorder	not discussed	not discussed	not discussed	longitudinal assessment of impact	empirical	n
belleville2019	Mixed	evacuees from 2016 Fort McMurray Wildfiles	55	Other	subsample of q'naire + snowball	n	Canada - Alberta	mh	n	y	n	n	cross secctionanal at 3 months post fire	natural disaster - wildfire	experience being evacuated	diagnostic interview - psychiatric/psychological	Insomnia assessment	gender, age, married, children, residence status, employment pre-fire, change in work since fire	descriptive	positive	no comparator	44% diagnosed with insomnia disorder	not discussed	not discussed	not discussed	longitudinal assessment of impact	empirical	n
berk2014	Quantiative	Adults over 18 years.	15140	Other	Sampling method not stated. Refers to documentation on dataset NHANES (National Health and Nutrition Examination Survey)	n	USA? Doesn't state	both	n	n	y	y	national survey including physiological data	Measuring blood levels of heavy metals	Cadmium	questionnaire	Depressive symptoms (Patient Health Questionnaire PHQ-9) with cut off threshold of 9/10 to indicate depression	socioeconomic status, ethinicity, comorbid medical illnesses, relevant biological measurements, age, gender, country of birth, smoking exposure.	multivariate models	positive		Higher blood cadmium levels associated with higher prevalence of depression		This exploratory study suggests the need for further investigation of the role of various agents and classess of agents in the pathophysiology of depression			composite	n
berk2014	Quantiative	Adults over 18 years.	15140	Other	Sampling method not stated. Refers to documentation on dataset NHANES (National Health and Nutrition Examination Survey)	n	USA? Doesn't state	both	n	n	y	y	national survey including physiological data	Measuring blood levels of heavy metals	Lead	questionnaire	Depressive symptoms (Patient Health Questionnaire PHQ-9) with cut off threshold of 9/10 to indicate depression	socioeconomic status, ethinicity, comorbid medical illnesses, relevant biological measurements, age, gender, country of birth, smoking exposure.	multivariate models	null		no sig association		This exploratory study suggests the need for further investigation of the role of various agents and classess of agents in the pathophysiology of depression			composite	n
berk2014	Quantiative	Adults over 18 years.	15140	Other	Sampling method not stated. Refers to documentation on dataset NHANES (National Health and Nutrition Examination Survey)	n	USA? Doesn't state	both	n	n	y	y	national survey including physiological data	Measuring blood levels of heavy metals	Mercury	questionnaire	Depressive symptoms (Patient Health Questionnaire PHQ-9) with cut off threshold of 9/10 to indicate depression	socioeconomic status, ethinicity, comorbid medical illnesses, relevant biological measurements, age, gender, country of birth, smoking exposure.	multivariate models	negative		Higher blood mercury levels associated with lower prevalence of depression		This exploratory study suggests the need for further investigation of the role of various agents and classess of agents in the pathophysiology of depression			composite	n
berk2014	Quantiative	Adults over 18 years.	15140	Other	Sampling method not stated. Refers to documentation on dataset NHANES (National Health and Nutrition Examination Survey)	n	USA? Doesn't state	both	n	n	y	y	national survey including physiological data	Measuring blood levels of polyfluorinated compounds	Perfluoroctanoic acid	questionnaire	Depressive symptoms (Patient Health Questionnaire PHQ-9) with cut off threshold of 9/10 to indicate depression	socioeconomic status, ethinicity, comorbid medical illnesses, relevant biological measurements, age, gender, country of birth, smoking exposure.	multivariate models	negative		Higher levels of several polyfluorinated compounds were related to lower depression prevalence. Others not significantly associated.		This exploratory study suggests the need for further investigation of the role of various agents and classess of agents in the pathophysiology of depression			composite	n
berk2014	Quantiative	Adults over 18 years.	15140	Other	Sampling method not stated. Refers to documentation on dataset NHANES (National Health and Nutrition Examination Survey)	n	USA? Doesn't state	both	n	n	y	y	national survey including physiological data	Measuring blood levels of polyfluorinated compounds	Perfluoronexane sulfonic acid	questionnaire	Depressive symptoms (Patient Health Questionnaire PHQ-9) with cut off threshold of 9/10 to indicate depression	socioeconomic status, ethinicity, comorbid medical illnesses, relevant biological measurements, age, gender, country of birth, smoking exposure.	multivariate models	negative		Higher levels of several polyfluorinated compounds were related to lower depression prevalence. Others not significantly associated.		This exploratory study suggests the need for further investigation of the role of various agents and classess of agents in the pathophysiology of depression			composite	n
berk2014	Quantiative	Adults over 18 years.	15140	Other	Sampling method not stated. Refers to documentation on dataset NHANES (National Health and Nutrition Examination Survey)	n	USA? Doesn't state	both	n	n	y	y	national survey including physiological data	Measuring blood levels of polyfluorinated compounds	2-(N-ethyl-PFOSA) acetate	questionnaire	Depressive symptoms (Patient Health Questionnaire PHQ-9) with cut off threshold of 9/10 to indicate depression	socioeconomic status, ethinicity, comorbid medical illnesses, relevant biological measurements, age, gender, country of birth, smoking exposure.	multivariate models	null		Higher levels of several polyfluorinated compounds were related to lower depression prevalence. Others not significantly associated.		This exploratory study suggests the need for further investigation of the role of various agents and classess of agents in the pathophysiology of depression			composite	n
berk2014	Quantiative	Adults over 18 years.	15140	Other	Sampling method not stated. Refers to documentation on dataset NHANES (National Health and Nutrition Examination Survey)	n	USA? Doesn't state	both	n	n	y	y	national survey including physiological data	Measuring blood levels of polyfluorinated compounds	2-(N-methyl-PFOSA) acetate	questionnaire	Depressive symptoms (Patient Health Questionnaire PHQ-9) with cut off threshold of 9/10 to indicate depression	socioeconomic status, ethinicity, comorbid medical illnesses, relevant biological measurements, age, gender, country of birth, smoking exposure.	multivariate models	null		Higher levels of several polyfluorinated compounds were related to lower depression prevalence. Others not significantly associated.		This exploratory study suggests the need for further investigation of the role of various agents and classess of agents in the pathophysiology of depression			composite	n
berk2014	Quantiative	Adults over 18 years.	15140	Other	Sampling method not stated. Refers to documentation on dataset NHANES (National Health and Nutrition Examination Survey)	n	USA? Doesn't state	both	n	n	y	y	national survey including physiological data	Measuring blood levels of polyfluorinated compounds	Perfluorodecanoic acid	questionnaire	Depressive symptoms (Patient Health Questionnaire PHQ-9) with cut off threshold of 9/10 to indicate depression	socioeconomic status, ethinicity, comorbid medical illnesses, relevant biological measurements, age, gender, country of birth, smoking exposure.	multivariate models	negative		Higher levels of several polyfluorinated compounds were related to lower depression prevalence. Others not significantly associated.		This exploratory study suggests the need for further investigation of the role of various agents and classess of agents in the pathophysiology of depression			composite	n
berk2014	Quantiative	Adults over 18 years.	15140	Other	Sampling method not stated. Refers to documentation on dataset NHANES (National Health and Nutrition Examination Survey)	n	USA? Doesn't state	both	n	n	y	y	national survey including physiological data	Measuring blood levels of polyfluorinated compounds	Perfluoroburane sulfonic acid	questionnaire	Depressive symptoms (Patient Health Questionnaire PHQ-9) with cut off threshold of 9/10 to indicate depression	socioeconomic status, ethinicity, comorbid medical illnesses, relevant biological measurements, age, gender, country of birth, smoking exposure.	multivariate models	null		Higher levels of several polyfluorinated compounds were related to lower depression prevalence. Others not significantly associated.		This exploratory study suggests the need for further investigation of the role of various agents and classess of agents in the pathophysiology of depression			composite	n
berk2014	Quantiative	Adults over 18 years.	15140	Other	Sampling method not stated. Refers to documentation on dataset NHANES (National Health and Nutrition Examination Survey)	n	USA? Doesn't state	both	n	n	y	y	national survey including physiological data	Measuring blood levels of polyfluorinated compounds	Perfluoroheptanoic acid	questionnaire	Depressive symptoms (Patient Health Questionnaire PHQ-9) with cut off threshold of 9/10 to indicate depression	socioeconomic status, ethinicity, comorbid medical illnesses, relevant biological measurements, age, gender, country of birth, smoking exposure.	multivariate models	null		Higher levels of several polyfluorinated compounds were related to lower depression prevalence. Others not significantly associated.		This exploratory study suggests the need for further investigation of the role of various agents and classess of agents in the pathophysiology of depression			composite	n
berk2014	Quantiative	Adults over 18 years.	15140	Other	Sampling method not stated. Refers to documentation on dataset NHANES (National Health and Nutrition Examination Survey)	n	USA? Doesn't state	both	n	n	y	y	national survey including physiological data	Measuring blood levels of polyfluorinated compounds	Perfluorononanoic acid	questionnaire	Depressive symptoms (Patient Health Questionnaire PHQ-9) with cut off threshold of 9/10 to indicate depression	socioeconomic status, ethinicity, comorbid medical illnesses, relevant biological measurements, age, gender, country of birth, smoking exposure.	multivariate models	negative		Higher levels of several polyfluorinated compounds were related to lower depression prevalence. Others not significantly associated.		This exploratory study suggests the need for further investigation of the role of various agents and classess of agents in the pathophysiology of depression			composite	n
berk2014	Quantiative	Adults over 18 years.	15140	Other	Sampling method not stated. Refers to documentation on dataset NHANES (National Health and Nutrition Examination Survey)	n	USA? Doesn't state	both	n	n	y	y	national survey including physiological data	Measuring blood levels of polyfluorinated compounds	Perfluorooctane sulfonaminde	questionnaire	Depressive symptoms (Patient Health Questionnaire PHQ-9) with cut off threshold of 9/10 to indicate depression	socioeconomic status, ethinicity, comorbid medical illnesses, relevant biological measurements, age, gender, country of birth, smoking exposure.	multivariate models	null		Higher levels of several polyfluorinated compounds were related to lower depression prevalence. Others not significantly associated.		This exploratory study suggests the need for further investigation of the role of various agents and classess of agents in the pathophysiology of depression			composite	n
berk2014	Quantiative	Adults over 18 years.	15140	Other	Sampling method not stated. Refers to documentation on dataset NHANES (National Health and Nutrition Examination Survey)	n	USA? Doesn't state	both	n	n	y	y	national survey including physiological data	Measuring blood levels of polyfluorinated compounds	Perfluoroundecamoic acid	questionnaire	Depressive symptoms (Patient Health Questionnaire PHQ-9) with cut off threshold of 9/10 to indicate depression	socioeconomic status, ethinicity, comorbid medical illnesses, relevant biological measurements, age, gender, country of birth, smoking exposure.	multivariate models	null		Higher levels of several polyfluorinated compounds were related to lower depression prevalence. Others not significantly associated.		This exploratory study suggests the need for further investigation of the role of various agents and classess of agents in the pathophysiology of depression			composite	n
berk2014	Quantiative	Adults over 18 years.	15140	Other	Sampling method not stated. Refers to documentation on dataset NHANES (National Health and Nutrition Examination Survey)	n	USA? Doesn't state	both	n	n	y	y	national survey including physiological data	Measuring blood levels of polyfluorinated compounds	Perfluorododecamoic acid	questionnaire	Depressive symptoms (Patient Health Questionnaire PHQ-9) with cut off threshold of 9/10 to indicate depression	socioeconomic status, ethinicity, comorbid medical illnesses, relevant biological measurements, age, gender, country of birth, smoking exposure.	multivariate models	null		Higher levels of several polyfluorinated compounds were related to lower depression prevalence. Others not significantly associated.		This exploratory study suggests the need for further investigation of the role of various agents and classess of agents in the pathophysiology of depression			composite	n
berk2014	Quantiative	Adults over 18 years.	15140	Other	Sampling method not stated. Refers to documentation on dataset NHANES (National Health and Nutrition Examination Survey)	n	USA? Doesn't state	both	n	n	y	y	national survey including physiological data	Measuring blood levels of polyfluorinated compounds	Perfluorooctance sulfonic acid	questionnaire	Depressive symptoms (Patient Health Questionnaire PHQ-9) with cut off threshold of 9/10 to indicate depression	socioeconomic status, ethinicity, comorbid medical illnesses, relevant biological measurements, age, gender, country of birth, smoking exposure.	multivariate models	null		Higher levels of several polyfluorinated compounds were related to lower depression prevalence. Others not significantly associated.		This exploratory study suggests the need for further investigation of the role of various agents and classess of agents in the pathophysiology of depression			composite	n
berk2014	Quantiative	Adults over 18 years.	15140	Other	Sampling method not stated. Refers to documentation on dataset NHANES (National Health and Nutrition Examination Survey)	n	USA? Doesn't state	both	n	n	y	y	national survey including physiological data	Measuring urinary levels of phthalates	Monocarboxynonyl Phthalate	questionnaire	Depressive symptoms (Patient Health Questionnaire PHQ-9) with cut off threshold of 9/10 to indicate depression	socioeconomic status, ethinicity, comorbid medical illnesses, relevant biological measurements, age, gender, country of birth, smoking exposure.	multivariate models	null		Phthalate levels were not associated with depression prevalence		This exploratory study suggests the need for further investigation of the role of various agents and classess of agents in the pathophysiology of depression			composite	n
berk2014	Quantiative	Adults over 18 years.	15140	Other	Sampling method not stated. Refers to documentation on dataset NHANES (National Health and Nutrition Examination Survey)	n	USA? Doesn't state	both	n	n	y	y	national survey including physiological data	Measuring urinary levels of phthalates	Monocarboxyoctyl Phythalate	questionnaire	Depressive symptoms (Patient Health Questionnaire PHQ-9) with cut off threshold of 9/10 to indicate depression	socioeconomic status, ethinicity, comorbid medical illnesses, relevant biological measurements, age, gender, country of birth, smoking exposure.	multivariate models	null		Phthalate levels were not associated with depression prevalence		This exploratory study suggests the need for further investigation of the role of various agents and classess of agents in the pathophysiology of depression			composite	n
berk2014	Quantiative	Adults over 18 years.	15140	Other	Sampling method not stated. Refers to documentation on dataset NHANES (National Health and Nutrition Examination Survey)	n	USA? Doesn't state	both	n	n	y	y	national survey including physiological data	Measuring urinary levels of phthalates	Mono-2-ethyl-5-carboxypentyl phthalate	questionnaire	Depressive symptoms (Patient Health Questionnaire PHQ-9) with cut off threshold of 9/10 to indicate depression	socioeconomic status, ethinicity, comorbid medical illnesses, relevant biological measurements, age, gender, country of birth, smoking exposure.	multivariate models	null		Phthalate levels were not associated with depression prevalence		This exploratory study suggests the need for further investigation of the role of various agents and classess of agents in the pathophysiology of depression			composite	n
berk2014	Quantiative	Adults over 18 years.	15140	Other	Sampling method not stated. Refers to documentation on dataset NHANES (National Health and Nutrition Examination Survey)	n	USA? Doesn't state	both	n	n	y	y	national survey including physiological data	Measuring urinary levels of phthalates	Mono-N-butyl phthalate	questionnaire	Depressive symptoms (Patient Health Questionnaire PHQ-9) with cut off threshold of 9/10 to indicate depression	socioeconomic status, ethinicity, comorbid medical illnesses, relevant biological measurements, age, gender, country of birth, smoking exposure.	multivariate models	null		Phthalate levels were not associated with depression prevalence		This exploratory study suggests the need for further investigation of the role of various agents and classess of agents in the pathophysiology of depression			composite	n
berk2014	Quantiative	Adults over 18 years.	15140	Other	Sampling method not stated. Refers to documentation on dataset NHANES (National Health and Nutrition Examination Survey)	n	USA? Doesn't state	both	n	n	y	y	national survey including physiological data	Measuring urinary levels of phthalates	Mono-(3 carboxypropyl) phthalate	questionnaire	Depressive symptoms (Patient Health Questionnaire PHQ-9) with cut off threshold of 9/10 to indicate depression	socioeconomic status, ethinicity, comorbid medical illnesses, relevant biological measurements, age, gender, country of birth, smoking exposure.	multivariate models	null		Phthalate levels were not associated with depression prevalence		This exploratory study suggests the need for further investigation of the role of various agents and classess of agents in the pathophysiology of depression			composite	n
berk2014	Quantiative	Adults over 18 years.	15140	Other	Sampling method not stated. Refers to documentation on dataset NHANES (National Health and Nutrition Examination Survey)	n	USA? Doesn't state	both	n	n	y	y	national survey including physiological data	Measuring urinary levels of phthalates	Monoethyl phthalate	questionnaire	Depressive symptoms (Patient Health Questionnaire PHQ-9) with cut off threshold of 9/10 to indicate depression	socioeconomic status, ethinicity, comorbid medical illnesses, relevant biological measurements, age, gender, country of birth, smoking exposure.	multivariate models	null		Phthalate levels were not associated with depression prevalence		This exploratory study suggests the need for further investigation of the role of various agents and classess of agents in the pathophysiology of depression			composite	n
berk2014	Quantiative	Adults over 18 years.	15140	Other	Sampling method not stated. Refers to documentation on dataset NHANES (National Health and Nutrition Examination Survey)	n	USA? Doesn't state	both	n	n	y	y	national survey including physiological data	Measuring urinary levels of phthalates	Mono-(2-ethyl-5-hydroxyhexyl) phthalate	questionnaire	Depressive symptoms (Patient Health Questionnaire PHQ-9) with cut off threshold of 9/10 to indicate depression	socioeconomic status, ethinicity, comorbid medical illnesses, relevant biological measurements, age, gender, country of birth, smoking exposure.	multivariate models	null		Phthalate levels were not associated with depression prevalence		This exploratory study suggests the need for further investigation of the role of various agents and classess of agents in the pathophysiology of depression			composite	n
berk2014	Quantiative	Adults over 18 years.	15140	Other	Sampling method not stated. Refers to documentation on dataset NHANES (National Health and Nutrition Examination Survey)	n	USA? Doesn't state	both	n	n	y	y	national survey including physiological data	Measuring urinary levels of phthalates	Mono(2-ethyl)-hexyl phthalate	questionnaire	Depressive symptoms (Patient Health Questionnaire PHQ-9) with cut off threshold of 9/10 to indicate depression	socioeconomic status, ethinicity, comorbid medical illnesses, relevant biological measurements, age, gender, country of birth, smoking exposure.	multivariate models	null		Phthalate levels were not associated with depression prevalence		This exploratory study suggests the need for further investigation of the role of various agents and classess of agents in the pathophysiology of depression			composite	n
berk2014	Quantiative	Adults over 18 years.	15140	Other	Sampling method not stated. Refers to documentation on dataset NHANES (National Health and Nutrition Examination Survey)	n	USA? Doesn't state	both	n	n	y	y	national survey including physiological data	Measuring urinary levels of phthalates	Mono-N-methyl phthalate	questionnaire	Depressive symptoms (Patient Health Questionnaire PHQ-9) with cut off threshold of 9/10 to indicate depression	socioeconomic status, ethinicity, comorbid medical illnesses, relevant biological measurements, age, gender, country of birth, smoking exposure.	multivariate models	null		Phthalate levels were not associated with depression prevalence		This exploratory study suggests the need for further investigation of the role of various agents and classess of agents in the pathophysiology of depression			composite	n
berk2014	Quantiative	Adults over 18 years.	15140	Other	Sampling method not stated. Refers to documentation on dataset NHANES (National Health and Nutrition Examination Survey)	n	USA? Doesn't state	both	n	n	y	y	national survey including physiological data	Measuring urinary levels of phthalates	Mono-isononyl phthalate	questionnaire	Depressive symptoms (Patient Health Questionnaire PHQ-9) with cut off threshold of 9/10 to indicate depression	socioeconomic status, ethinicity, comorbid medical illnesses, relevant biological measurements, age, gender, country of birth, smoking exposure.	multivariate models	null		Phthalate levels were not associated with depression prevalence		This exploratory study suggests the need for further investigation of the role of various agents and classess of agents in the pathophysiology of depression			composite	n
berk2014	Quantiative	Adults over 18 years.	15140	Other	Sampling method not stated. Refers to documentation on dataset NHANES (National Health and Nutrition Examination Survey)	n	USA? Doesn't state	both	n	n	y	y	national survey including physiological data	Measuring urinary levels of phthalates	Mono-(2-ethyl-5-oxohyexyl) phthalate	questionnaire	Depressive symptoms (Patient Health Questionnaire PHQ-9) with cut off threshold of 9/10 to indicate depression	socioeconomic status, ethinicity, comorbid medical illnesses, relevant biological measurements, age, gender, country of birth, smoking exposure.	multivariate models	null		Phthalate levels were not associated with depression prevalence		This exploratory study suggests the need for further investigation of the role of various agents and classess of agents in the pathophysiology of depression			composite	n
berk2014	Quantiative	Adults over 18 years.	15140	Other	Sampling method not stated. Refers to documentation on dataset NHANES (National Health and Nutrition Examination Survey)	n	USA? Doesn't state	both	n	n	y	y	national survey including physiological data	Measuring urinary levels of phthalates	Mono-benzyl phthalate	questionnaire	Depressive symptoms (Patient Health Questionnaire PHQ-9) with cut off threshold of 9/10 to indicate depression	socioeconomic status, ethinicity, comorbid medical illnesses, relevant biological measurements, age, gender, country of birth, smoking exposure.	multivariate models	null		Phthalate levels were not associated with depression prevalence		This exploratory study suggests the need for further investigation of the role of various agents and classess of agents in the pathophysiology of depression			composite	n
berk2014	Quantiative	Adults over 18 years.	15140	Other	Sampling method not stated. Refers to documentation on dataset NHANES (National Health and Nutrition Examination Survey)	n	USA? Doesn't state	both	n	n	y	y	national survey including physiological data	Measuring urinary levels of phthalates	Moni-isobutyl phthalate	questionnaire	Depressive symptoms (Patient Health Questionnaire PHQ-9) with cut off threshold of 9/10 to indicate depression	socioeconomic status, ethinicity, comorbid medical illnesses, relevant biological measurements, age, gender, country of birth, smoking exposure.	multivariate models	null		Phthalate levels were not associated with depression prevalence		This exploratory study suggests the need for further investigation of the role of various agents and classess of agents in the pathophysiology of depression			composite	n
berk2014	Quantiative	Adults over 18 years.	15140	Other	Sampling method not stated. Refers to documentation on dataset NHANES (National Health and Nutrition Examination Survey)	n	USA? Doesn't state	both	n	n	y	y	national survey including physiological data	Measuring urinary levels of phenols	Bisphenol A	questionnaire	Depressive symptoms (Patient Health Questionnaire PHQ-9) with cut off threshold of 9/10 to indicate depression	socioeconomic status, ethinicity, comorbid medical illnesses, relevant biological measurements, age, gender, country of birth, smoking exposure.	multivariate models	null		With the exception of the phenols benophenon-3, triclosan, and ethyl paraben (each associated with lower depression prevalence, there were no associations etween the phthalates, pesticaides and organophosphates and depression		This exploratory study suggests the need for further investigation of the role of various agents and classess of agents in the pathophysiology of depression			composite	n
berk2014	Quantiative	Adults over 18 years.	15140	Other	Sampling method not stated. Refers to documentation on dataset NHANES (National Health and Nutrition Examination Survey)	n	USA? Doesn't state	both	n	n	y	y	national survey including physiological data	Measuring urinary levels of phenols	Benzophenone-3	questionnaire	Depressive symptoms (Patient Health Questionnaire PHQ-9) with cut off threshold of 9/10 to indicate depression	socioeconomic status, ethinicity, comorbid medical illnesses, relevant biological measurements, age, gender, country of birth, smoking exposure.	multivariate models	negative		With the exception of the phenols benophenon-3, triclosan, and ethyl paraben (each associated with lower depression prevalence, there were no associations etween the phthalates, pesticaides and organophosphates and depression		This exploratory study suggests the need for further investigation of the role of various agents and classess of agents in the pathophysiology of depression			composite	n
berk2014	Quantiative	Adults over 18 years.	15140	Other	Sampling method not stated. Refers to documentation on dataset NHANES (National Health and Nutrition Examination Survey)	n	USA? Doesn't state	both	n	n	y	y	national survey including physiological data	Measuring urinary levels of phenols	4-tert-octylphenol	questionnaire	Depressive symptoms (Patient Health Questionnaire PHQ-9) with cut off threshold of 9/10 to indicate depression	socioeconomic status, ethinicity, comorbid medical illnesses, relevant biological measurements, age, gender, country of birth, smoking exposure.	multivariate models	null		With the exception of the phenols benophenon-3, triclosan, and ethyl paraben (each associated with lower depression prevalence, there were no associations etween the phthalates, pesticaides and organophosphates and depression		This exploratory study suggests the need for further investigation of the role of various agents and classess of agents in the pathophysiology of depression			composite	n
berk2014	Quantiative	Adults over 18 years.	15140	Other	Sampling method not stated. Refers to documentation on dataset NHANES (National Health and Nutrition Examination Survey)	n	USA? Doesn't state	both	n	n	y	y	national survey including physiological data	Measuring urinary levels of phenols	Triclosan	questionnaire	Depressive symptoms (Patient Health Questionnaire PHQ-9) with cut off threshold of 9/10 to indicate depression	socioeconomic status, ethinicity, comorbid medical illnesses, relevant biological measurements, age, gender, country of birth, smoking exposure.	multivariate models	negative		With the exception of the phenols benophenon-3, triclosan, and ethyl paraben (each associated with lower depression prevalence, there were no associations etween the phthalates, pesticaides and organophosphates and depression		This exploratory study suggests the need for further investigation of the role of various agents and classess of agents in the pathophysiology of depression			composite	n
berk2014	Quantiative	Adults over 18 years.	15140	Other	Sampling method not stated. Refers to documentation on dataset NHANES (National Health and Nutrition Examination Survey)	n	USA? Doesn't state	both	n	n	y	y	national survey including physiological data	Measuring urinary levels of phenols	Butyl paraben	questionnaire	Depressive symptoms (Patient Health Questionnaire PHQ-9) with cut off threshold of 9/10 to indicate depression	socioeconomic status, ethinicity, comorbid medical illnesses, relevant biological measurements, age, gender, country of birth, smoking exposure.	multivariate models	null		With the exception of the phenols benophenon-3, triclosan, and ethyl paraben (each associated with lower depression prevalence, there were no associations etween the phthalates, pesticaides and organophosphates and depression		This exploratory study suggests the need for further investigation of the role of various agents and classess of agents in the pathophysiology of depression			composite	n
berk2014	Quantiative	Adults over 18 years.	15140	Other	Sampling method not stated. Refers to documentation on dataset NHANES (National Health and Nutrition Examination Survey)	n	USA? Doesn't state	both	n	n	y	y	national survey including physiological data	Measuring urinary levels of phenols	Ethyl paraben	questionnaire	Depressive symptoms (Patient Health Questionnaire PHQ-9) with cut off threshold of 9/10 to indicate depression	socioeconomic status, ethinicity, comorbid medical illnesses, relevant biological measurements, age, gender, country of birth, smoking exposure.	multivariate models	negative		With the exception of the phenols benophenon-3, triclosan, and ethyl paraben (each associated with lower depression prevalence, there were no associations etween the phthalates, pesticaides and organophosphates and depression		This exploratory study suggests the need for further investigation of the role of various agents and classess of agents in the pathophysiology of depression			composite	n
berk2014	Quantiative	Adults over 18 years.	15140	Other	Sampling method not stated. Refers to documentation on dataset NHANES (National Health and Nutrition Examination Survey)	n	USA? Doesn't state	both	n	n	y	y	national survey including physiological data	Measuring urinary levels of phenols	Methy paraben	questionnaire	Depressive symptoms (Patient Health Questionnaire PHQ-9) with cut off threshold of 9/10 to indicate depression	socioeconomic status, ethinicity, comorbid medical illnesses, relevant biological measurements, age, gender, country of birth, smoking exposure.	multivariate models	null		With the exception of the phenols benophenon-3, triclosan, and ethyl paraben (each associated with lower depression prevalence, there were no associations etween the phthalates, pesticaides and organophosphates and depression		This exploratory study suggests the need for further investigation of the role of various agents and classess of agents in the pathophysiology of depression			composite	n
berk2014	Quantiative	Adults over 18 years.	15140	Other	Sampling method not stated. Refers to documentation on dataset NHANES (National Health and Nutrition Examination Survey)	n	USA? Doesn't state	both	n	n	y	y	national survey including physiological data	Measuring urinary levels of phenols	Propyl paraben	questionnaire	Depressive symptoms (Patient Health Questionnaire PHQ-9) with cut off threshold of 9/10 to indicate depression	socioeconomic status, ethinicity, comorbid medical illnesses, relevant biological measurements, age, gender, country of birth, smoking exposure.	multivariate models	null		With the exception of the phenols benophenon-3, triclosan, and ethyl paraben (each associated with lower depression prevalence, there were no associations etween the phthalates, pesticaides and organophosphates and depression		This exploratory study suggests the need for further investigation of the role of various agents and classess of agents in the pathophysiology of depression			composite	n
berk2014	Quantiative	Adults over 18 years.	15140	Other	Sampling method not stated. Refers to documentation on dataset NHANES (National Health and Nutrition Examination Survey)	n	USA? Doesn't state	both	n	n	y	y	national survey including physiological data	Measuring urinary levels of organophosphate pesticides	2,5-dichlorophenol	questionnaire	Depressive symptoms (Patient Health Questionnaire PHQ-9) with cut off threshold of 9/10 to indicate depression	socioeconomic status, ethinicity, comorbid medical illnesses, relevant biological measurements, age, gender, country of birth, smoking exposure.	multivariate models	null		With the exception of the phenols benophenon-3, triclosan, and ethyl paraben (each associated with lower depression prevalence, there were no associations etween the phthalates, pesticaides and organophosphates and depression		This exploratory study suggests the need for further investigation of the role of various agents and classess of agents in the pathophysiology of depression			composite	n
berk2014	Quantiative	Adults over 18 years.	15140	Other	Sampling method not stated. Refers to documentation on dataset NHANES (National Health and Nutrition Examination Survey)	n	USA? Doesn't state	both	n	n	y	y	national survey including physiological data	Measuring urinary levels of organophosphate pesticides	O-phenyl phenol	questionnaire	Depressive symptoms (Patient Health Questionnaire PHQ-9) with cut off threshold of 9/10 to indicate depression	socioeconomic status, ethinicity, comorbid medical illnesses, relevant biological measurements, age, gender, country of birth, smoking exposure.	multivariate models	null		With the exception of the phenols benophenon-3, triclosan, and ethyl paraben (each associated with lower depression prevalence, there were no associations etween the phthalates, pesticaides and organophosphates and depression		This exploratory study suggests the need for further investigation of the role of various agents and classess of agents in the pathophysiology of depression			composite	n
berk2014	Quantiative	Adults over 18 years.	15140	Other	Sampling method not stated. Refers to documentation on dataset NHANES (National Health and Nutrition Examination Survey)	n	USA? Doesn't state	both	n	n	y	y	national survey including physiological data	Measuring urinary levels of organophosphate pesticides	2,4-dichlorophenol	questionnaire	Depressive symptoms (Patient Health Questionnaire PHQ-9) with cut off threshold of 9/10 to indicate depression	socioeconomic status, ethinicity, comorbid medical illnesses, relevant biological measurements, age, gender, country of birth, smoking exposure.	multivariate models	null		With the exception of the phenols benophenon-3, triclosan, and ethyl paraben (each associated with lower depression prevalence, there were no associations etween the phthalates, pesticaides and organophosphates and depression		This exploratory study suggests the need for further investigation of the role of various agents and classess of agents in the pathophysiology of depression			composite	n
berk2014	Quantiative	Adults over 18 years.	15140	Other	Sampling method not stated. Refers to documentation on dataset NHANES (National Health and Nutrition Examination Survey)	n	USA? Doesn't state	both	n	n	y	y	national survey including physiological data	Measuring urinary levels of organophosphate pesticides	2,4,5-trichlorophenol	questionnaire	Depressive symptoms (Patient Health Questionnaire PHQ-9) with cut off threshold of 9/10 to indicate depression	socioeconomic status, ethinicity, comorbid medical illnesses, relevant biological measurements, age, gender, country of birth, smoking exposure.	multivariate models	null		With the exception of the phenols benophenon-3, triclosan, and ethyl paraben (each associated with lower depression prevalence, there were no associations etween the phthalates, pesticaides and organophosphates and depression		This exploratory study suggests the need for further investigation of the role of various agents and classess of agents in the pathophysiology of depression			composite	n
berk2014	Quantiative	Adults over 18 years.	15140	Other	Sampling method not stated. Refers to documentation on dataset NHANES (National Health and Nutrition Examination Survey)	n	USA? Doesn't state	both	n	n	y	y	national survey including physiological data	Measuring urinary levels of organophosphate pesticides	2,4,6-trichlorophenol	questionnaire	Depressive symptoms (Patient Health Questionnaire PHQ-9) with cut off threshold of 9/10 to indicate depression	socioeconomic status, ethinicity, comorbid medical illnesses, relevant biological measurements, age, gender, country of birth, smoking exposure.	multivariate models	null		With the exception of the phenols benophenon-3, triclosan, and ethyl paraben (each associated with lower depression prevalence, there were no associations etween the phthalates, pesticaides and organophosphates and depression		This exploratory study suggests the need for further investigation of the role of various agents and classess of agents in the pathophysiology of depression			composite	n
berk2014	Quantiative	Adults over 18 years.	15140	Other	Sampling method not stated. Refers to documentation on dataset NHANES (National Health and Nutrition Examination Survey)	n	USA? Doesn't state	both	n	n	y	y	national survey including physiological data	Measuring urinary levels of organophosphate pesticides	Dimethylphosphate	questionnaire	Depressive symptoms (Patient Health Questionnaire PHQ-9) with cut off threshold of 9/10 to indicate depression	socioeconomic status, ethinicity, comorbid medical illnesses, relevant biological measurements, age, gender, country of birth, smoking exposure.	multivariate models	null		With the exception of the phenols benophenon-3, triclosan, and ethyl paraben (each associated with lower depression prevalence, there were no associations etween the phthalates, pesticaides and organophosphates and depression		This exploratory study suggests the need for further investigation of the role of various agents and classess of agents in the pathophysiology of depression			composite	n
berk2014	Quantiative	Adults over 18 years.	15140	Other	Sampling method not stated. Refers to documentation on dataset NHANES (National Health and Nutrition Examination Survey)	n	USA? Doesn't state	both	n	n	y	y	national survey including physiological data	Measuring urinary levels of organophosphate pesticides	Diethylphosphate	questionnaire	Depressive symptoms (Patient Health Questionnaire PHQ-9) with cut off threshold of 9/10 to indicate depression	socioeconomic status, ethinicity, comorbid medical illnesses, relevant biological measurements, age, gender, country of birth, smoking exposure.	multivariate models	null		With the exception of the phenols benophenon-3, triclosan, and ethyl paraben (each associated with lower depression prevalence, there were no associations etween the phthalates, pesticaides and organophosphates and depression		This exploratory study suggests the need for further investigation of the role of various agents and classess of agents in the pathophysiology of depression			composite	n
berk2014	Quantiative	Adults over 18 years.	15140	Other	Sampling method not stated. Refers to documentation on dataset NHANES (National Health and Nutrition Examination Survey)	n	USA? Doesn't state	both	n	n	y	y	national survey including physiological data	Measuring urinary levels of organophosphate pesticides	Dimethylthiophosphate	questionnaire	Depressive symptoms (Patient Health Questionnaire PHQ-9) with cut off threshold of 9/10 to indicate depression	socioeconomic status, ethinicity, comorbid medical illnesses, relevant biological measurements, age, gender, country of birth, smoking exposure.	multivariate models	null		With the exception of the phenols benophenon-3, triclosan, and ethyl paraben (each associated with lower depression prevalence, there were no associations etween the phthalates, pesticaides and organophosphates and depression		This exploratory study suggests the need for further investigation of the role of various agents and classess of agents in the pathophysiology of depression			composite	n
berk2014	Quantiative	Adults over 18 years.	15140	Other	Sampling method not stated. Refers to documentation on dataset NHANES (National Health and Nutrition Examination Survey)	n	USA? Doesn't state	both	n	n	y	y	national survey including physiological data	Measuring urinary levels of organophosphate pesticides	Diethylthiophosphate	questionnaire	Depressive symptoms (Patient Health Questionnaire PHQ-9) with cut off threshold of 9/10 to indicate depression	socioeconomic status, ethinicity, comorbid medical illnesses, relevant biological measurements, age, gender, country of birth, smoking exposure.	multivariate models	null		With the exception of the phenols benophenon-3, triclosan, and ethyl paraben (each associated with lower depression prevalence, there were no associations etween the phthalates, pesticaides and organophosphates and depression		This exploratory study suggests the need for further investigation of the role of various agents and classess of agents in the pathophysiology of depression			composite	n
berk2014	Quantiative	Adults over 18 years.	15140	Other	Sampling method not stated. Refers to documentation on dataset NHANES (National Health and Nutrition Examination Survey)	n	USA? Doesn't state	both	n	n	y	y	national survey including physiological data	Measuring urinary levels of organophosphate pesticides	Dimethyldithiophosphate	questionnaire	Depressive symptoms (Patient Health Questionnaire PHQ-9) with cut off threshold of 9/10 to indicate depression	socioeconomic status, ethinicity, comorbid medical illnesses, relevant biological measurements, age, gender, country of birth, smoking exposure.	multivariate models	null		With the exception of the phenols benophenon-3, triclosan, and ethyl paraben (each associated with lower depression prevalence, there were no associations etween the phthalates, pesticaides and organophosphates and depression		This exploratory study suggests the need for further investigation of the role of various agents and classess of agents in the pathophysiology of depression			composite	n
beutel2016	Quantiative	Adults age 35-74 in German study area	14635	stratified random	Sample stratified on gender, residence and age	y	City of Mainz and District of Mainz-Bingen, Germany	both	n	y	n	n	Cross-sectional data drawn from a cohort study	Questionnaire (Gutenberg Health Study)	self-reported noise annoyance - outcome variable was the highest scoring item of 12 items measuring noice annoyance from different sources (road traffic, aircraft, railways, industiral/comsturciton, neighbourhood indoor, neighbourhood outdoor) rated each for 'during the day' and 'in your sleep'	questionnaire - CAPI (computer assisted personal interview)	PHQ-9 (Patient Health Questionnaire, symptoms of depression), with cutoff of >/= 10 indicating depression	sex, age, socioeconomic status	Multiple regression w binominal distribution and log link fucntion	positive		Compared to the reference category of 'no annoyance', those reporting moderate, strong and extreme annoyance were significantly more likely to score above the threshold for depression, with the odds ratios increasing as expected with increasing noise annoyance		Further analysis to examine the contributions of specific sources of noie to annoyance during the day and in sleep;	Further analysis to address issues of causality		empirical	n
beutel2016	Quantiative	Adults age 35-74 in German study area	14635	stratified random	Sample stratified on gender, residence and age	y	City of Mainz and District of Mainz-Bingen, Germany	both	n	y	n	n	Cross-sectional data drawn from a cohort study	Questionnaire (Gutenberg Health Study)	self-reported noise annoyance - outcome variable was the highest scoring item of 12 items measuring noice annoyance from different sources (road traffic, aircraft, railways, industiral/comsturciton, neighbourhood indoor, neighbourhood outdoor) rated each for 'during the day' and 'in your sleep'	questionnaire - CAPI (computer assisted personal interview)	GAD-2 - 2 items from GAD-7 (Generalized Anxiety Disorder scale, symptoms of anxiety), with cutoff sum score of 3 indicating anxiety	sex, age, socioeconomic status	Multiple regression w binominal distribution and log link fucntion	positive		Compared to the reference category of 'no annoyance', those reporting moderate, strong and extreme annoyance were significantly more likely to score above the threshold for anxiety, with the odds ratios increasing as expected with increasing noise annoyance					empirical	n
beutel2020	Quantiative	35-74 years old, Mainz region, germany	9842	stratified random		y	Mainz region, Germany	mh	n	y	n	n		self reported noise annoyance	self reported noise annoyance	Survey	Depression - Patient health questionnaire	sex, age, employment, income, living with partner, socioeconomic status	poisson regression	positive		Night noise significant predictor of depression. Including air traffic, road, railway, industry		Specific noise sources			empirical	n
beutel2020	Quantiative	35-74 years old, Mainz region, germany	9842	stratified random		y	Mainz region, Germany	mh	n	y	n	n		self reported noise annoyance	self reported noise annoyance	Survey	Generalised anxiety disorder screener	sex, age, employment, income, living with partner, socioeconomic status	poisson regression	positive		Day and night noise a significant predictor of anxiety. Including air traffic, road, railway, industry		Specific noise sources			empirical	n
bevilacqua2020	Quantiative	Houston residents	161	convenience (non-students)		n	Houston, USA	mh	n	y	n	n		Hurricane exposure	Hurricane exposure tool	Survey	alcohol and substance misuse self report	age, gender, race, ethnicity, education, income	multiple liner regression	null		No impact			Psychosocial risk factor- particularly with women. Use of diagnoses rather than self report		empirical	n
bevilacqua2020	Quantiative	Houston residents	161	convenience (non-students)		n	Houston, USA	mh	n	y	n	n		Hurricane exposure	Hurricane exposure tool	Survey	PTSD checklist	age, gender, race, ethnicity, education, income	multiple liner regression	positive		Higher PTSD with higher hurricane exposure when accounting foir other variables			Psychosocial risk factor- particularly with women. Use of diagnoses rather than self report		empirical	n
bevilacqua2020	Quantiative	Houston residents	161	convenience (non-students)		n	Houston, USA	mh	n	y	n	n		Hurricane exposure	Hurricane exposure tool	Survey	Stress perceived stress scale	age, gender, race, ethnicity, education, income	multiple liner regression	positive		Higher stress with higher hurricane exposure when accounting foir other variables			Psychosocial risk factor- particularly with women. Use of diagnoses rather than self report		empirical	n
bevilacqua2020	Quantiative	Houston residents	161	convenience (non-students)		n	Houston, USA	mh	n	y	n	n		Hurricane exposure	Hurricane exposure tool	Survey	Generalised anxiety disorder screener	age, gender, race, ethnicity, education, income	multiple liner regression	positive		Higher anxiety with higher hurricane exposure when accounting foir other variables			Psychosocial risk factor- particularly with women. Use of diagnoses rather than self report		empirical	n
bevilacqua2020	Quantiative	Houston residents	161	convenience (non-students)		n	Houston, USA	mh	n	y	n	n		Hurricane exposure	Hurricane exposure tool	Survey	Depression - Patient health questionnaire	age, gender, race, ethnicity, education, income	multiple liner regression	positive		Higher depression with higher hurricane exposure when accounting foir other variables			Psychosocial risk factor- particularly with women. Use of diagnoses rather than self report		empirical	n
bezold2018	Quantiative	teenagers age 12-18	9385	Other	Drawn from 1999 Growing Up Today Study	n	United States	both	n	n	n	y	cross sectional	proximity to green space within 250m of residence	Normalised Difference Vegetation Index (NDVI)	self report	depression (McKnight Risk Factor Survey) - high = more symptoms	race/ethnicity, paternal education, maternal history of depression, census region / % white / median income / median home value / % college degree / urbanicity, participant gender, household income; estimated Pm2.5	logistic regression	null		no association between proximity of green space within 250m of residence and depressive symptoms	not discussed	incorporate viewshed analysis to capture blue/greenspace exposure; assess speciﬁc types of vegetation (e.g. using land-use data); assess exposure not just at residence	not discussed	longitudinal anals oyses / take advantage of natural experiments to understand relationship between blue/green and mental health in adolescents	empirical	n
bezold2018	Quantiative	teenagers age 12-18	9385	Other	Drawn from 1999 Growing Up Today Study	n	United States	both	n	n	n	y	cross sectional	proximity to green space within 1250m of residence	Normalised Difference Vegetation Index (NDVI)	self report	depression (McKnight Risk Factor Survey) - high = more symptoms	race/ethnicity, paternal education, maternal history of depression, census region / % white / median income / median home value / % college degree / urbanicity, participant gender, household income	logistic regression	negative		more greenspace within 1250m of residence assocaited with less depressive symptoms	not discussed	incorporate viewshed analysis to capture blue/greenspace exposure; assess speciﬁc types of vegetation (e.g. using land-use data); assess exposure not just at residence	not discussed	longitudinal anals oyses / take advantage of natural experiments to understand relationship between blue/green and mental health in adolescents	empirical	n
bezold2018	Quantiative	teenagers age 12-18	9385	Other	Drawn from 1999 Growing Up Today Study	n	United States	both	n	n	n	y	cross sectional	proximity to blue space within 250m of residence	National Hydrography Dataset (NHD_ for interior surface waters & data from National Oceanic & Atmospheric Administration's National Centers for Environemntal Information for coastlines	self report	depression (McKnight Risk Factor Survey) - high = more symptoms	race/ethnicity, paternal education, maternal history of depression, census region / % white / median income / median home value / % college degree / urbanicity, participant gender, household income	logistic regression	null		no association between proximity of blue space and depressive symptoms	not discussed	incorporate viewshed analysis to capture blue/greenspace exposure; assess speciﬁc types of vegetation (e.g. using land-use data); assess exposure not just at residence	not discussed	longitudinal anals oyses / take advantage of natural experiments to understand relationship between blue/green and mental health in adolescents	empirical	n
bezold2018	Quantiative	teenagers age 12-18	9385	Other	Drawn from 1999 Growing Up Today Study	n	United States	both	n	n	n	y	cross sectional	proximity to blue space within 1250m of residence	National Hydrography Dataset (NHD_ for interior surface waters & data from National Oceanic & Atmospheric Administration's National Centers for Environemntal Information for coastlines	self report	depression (McKnight Risk Factor Survey) - high = more symptoms	race/ethnicity, paternal education, maternal history of depression, census region / % white / median income / median home value / % college degree / urbanicity, participant gender, household income	logistic regression	null		no association between proximity of blue space and depressive symptoms	not discussed	incorporate viewshed analysis to capture blue/greenspace exposure; assess speciﬁc types of vegetation (e.g. using land-use data); assess exposure not just at residence	not discussed	longitudinal anals oyses / take advantage of natural experiments to understand relationship between blue/green and mental health in adolescents	empirical	n
bielinis2019	Quantiative	Psychiatric hospital patients	50	convenience (non-students)	23 patients with psychotic disorder and 27 with affective disorders recruited	n	Olsztyn, Poland	both	n	y	n	n	Quasi-experimental pre-post design, no control	Forest-therapy intervention (1 session x 1.75 hours, walking in forest, with some additional exercises)	Took part in forest therapy intervention	questionnaire	STAI-S (State anxiety)	Analysed also by type of psychiatric disorder										y	Measuring transient mood states specific to the moment of filling in questionnaire
bielinis2019	Quantiative	Psychiatric hospital patients	50	convenience (non-students)	23 patients with psychotic disorder and 27 with affective disorders recruited	n	Olsztyn, Poland	both	n	y	n	n	Quasi-experimental pre-post design, no control	Forest-therapy intervention (1 session x 1.75 hours, walking in forest, with some additional exercises)	Took part in forest therapy intervention	questionnaire	POMS (Profile of Mood States)	Analysed also by type of psychiatric disorder										y	Measuring transient mood states specific to the moment of filling in questionnaire
bistricky2019	Quantiative	adults who survived Hurricane Harvey	801	Other	convenience (via online adverts, email to Univ students/staff) & snowball electronic communications	n	USA - Louisiana	mh	n	y	n	n	cross sectional	self-report exposure to hurricane/flooding	immediate loss/disruption	self report	PTSD - measured as post-traumatic stress (IES-R scale)	psychosocial resoures (resilience, social support, total traumas), frequency of post-disaster behaviour responses as mediators (positive coping, avoidance coping, help given)	structural equation modelling	other	direction depends on mediator	indirect effect of loss on post-traumatic stress via avoidant coping behaviour (increased PTSS), via pos coping behaviour (reduced PTSS), Help given (reduced PTSS)	not discussed	not discussed	measure of PTSD tht assesses symptoms according to DSM-5 domains	investigate effectiveness of post-disaster behaviour as mediator; longitudinal design; different population	composite	n
bistricky2019	Quantiative	adults who survived Hurricane Harvey	801	Other	convenience (via online adverts, email to Univ students/staff) & snowball electronic communications	n	USA - Louisiana	mh	n	y	n	n	cross sectional	self-report exposure to hurricane/flooding	perceived threat to life	self report	PTSD - measured as post-traumatic stress (IES-R scale)	psychosocial resoures (resilience, social support, total traumas), post-disaster behaviour responses as mediators (positive coping, avoidance coping, help given)	structural equation modelling	positive		indirect effect of perceived threat to life and increased post-traumatic stress via avoidance coping behaviour	not discussed	not discussed	measure of PTSD tht assesses symptoms according to DSM-5 domains	investigate effectiveness of post-disaster behaviour as mediator; longitudinal design; different population	composite	n
bistricky2019	Quantiative	adults who survived Hurricane Harvey	801	Other	convenience (via online adverts, email to Univ students/staff) & snowball electronic communications	n	USA - Louisiana	mh	n	y	n	n	cross sectional	self-report exposure to hurricane/flooding	help needed	self report	PTSD - measured as post-traumatic stress (IES-R scale)	psychosocial resoures (resilience, social support, total traumas), post-disaster behaviour responses as mediators (positive coping, avoidance coping, help given)	structural equation modelling	null		no direct or indirect effect between need for help and post-traumatic stress symptoms	not discussed	not discussed	measure of PTSD tht assesses symptoms according to DSM-5 domains	investigate effectiveness of post-disaster behaviour as mediator; longitudinal design; different population	composite	n
bistricky2019	Quantiative	adults who survived Hurricane Harvey	801	Other	convenience (via online adverts, email to Univ students/staff) & snowball electronic communications	n	USA - Louisiana	mh	n	y	n	n	cross sectional	self-report exposure to hurricane/flooding	immediate loss/disruption	self report	depressive symptoms (PHQ-8)	psychosocial resoures (resilience, social support, total traumas), post-disaster behaviour responses as mediators (positive coping, avoidance coping, help given)	structural equation modelling	positive		indirect effect between experienced loss and increased depression via avoidant coping behaviours	not discussed	not discussed	measure of PTSD tht assesses symptoms according to DSM-5 domains	investigate effectiveness of post-disaster behaviour as mediator; longitudinal design; different population	composite	n
bistricky2019	Quantiative	adults who survived Hurricane Harvey	801	Other	convenience (via online adverts, email to Univ students/staff) & snowball electronic communications	n	USA - Louisiana	mh	n	y	n	n	cross sectional	self-report exposure to hurricane/flooding	perceived threat to life	self report	depressive symptoms (PHQ-8)	psychosocial resoures (resilience, social support, total traumas), post-disaster behaviour responses as mediators (positive coping, avoidance coping, help given)	structural equation modelling	positive		indirect effect between perceived threat to life and increased depression via avoidant coping behaviours	not discussed	not discussed	measure of PTSD tht assesses symptoms according to DSM-5 domains	investigate effectiveness of post-disaster behaviour as mediator; longitudinal design; different population	composite	n
bistricky2019	Quantiative	adults who survived Hurricane Harvey	801	Other	convenience (via online adverts, email to Univ students/staff) & snowball electronic communications	n	USA - Louisiana	mh	n	y	n	n	cross sectional	self-report exposure to hurricane/flooding	help needed	self report	depressive symptoms (PHQ-8)	psychosocial resoures (resilience, social support, total traumas), post-disaster behaviour responses as mediators (positive coping, avoidance coping, help given)	structural equation modelling	null		no direct or indirect effect between need for help and depressive symptoms	not discussed	not discussed	measure of PTSD tht assesses symptoms according to DSM-5 domains	investigate effectiveness of post-disaster behaviour as mediator; longitudinal design; different population	composite	n
block2019	mixed	7647	1056	other	saturation sampling from census, maildrops, phone calls, news and social media	n	Victoria, Australia	both	n	y	n	n	n	survey part of mixed method longitudinal	attachment to environment	survey part of mixed method longitudinal	psychological distress		latent profile analysis	positive		psychological distress was found to be greater in the group with weak attachment to the environment	n/a	n/a	n/a	n/a	empirical	n
block2019	mixed	7647	1056	other	saturation sampling from census, maildrops, phone calls, news and social media	n	Victoria, Australia	both	n	y	n	n	n	survey part of mixed method longitudinal	attachment to environment	survey part of mixed method longitudinal	symptoms of depression		latent profile analysis	positive		symptoms of depression were found to be greater in the group with weak attachment to the environment	n/a	n/a	n/a	n/a	empirical	n
block2019	mixed	7647	1056	other	saturation sampling from census, maildrops, phone calls, news and social media	n	Victoria, Australia	both	n	y	n	n	n	survey part of mixed method longitudinal	attachment to environment	survey part of mixed method longitudinal	fire-related PTSD		latent profile analysis	positive		fire-related PTSD was found to be greater in the group with weak attachment to the environment	n/a	n/a	n/a	n/a	empirical	n
block2019	mixed	7647	1056	other	saturation sampling from census, maildrops, phone calls, news and social media	n	Victoria, Australia	both	n	y	n	n	n	survey part of mixed method longitudinal	attachment to environment	survey part of mixed method longitudinal	levels of resilience		latent profile analysis	positive		levels of resilience were found to be lower in the group with weak attachment to the environment	n/a	n/a	n/a	n/a	empirical	n
block2019	mixed	7647	1056	other	saturation sampling from census, maildrops, phone calls, news and social media	n	Victoria, Australia	both	n	y	n	n	n	survey part of mixed method longitudinal	attachment to environment	survey part of mixed method longitudinal	current life satisfaction		latent profile analysis	positive		current levels of life satisfaction found to be lower in the group with weak attachment to the environment	n/a	n/a	n/a	n/a	empirical	n
block2019	mixed	7647	1056	other	saturation sampling from census, maildrops, phone calls, news and social media	n	Victoria, Australia	both	n	y	n	n	n	survey part of mixed method longitudinal	attachment to environment	survey part of mixed method longitudinal	anticipated life satisfaction		latent profile analysis	positive		anticipated life satisfaction found to be lower in the group with weak attachment to the environment	n/a	n/a	n/a	n/a	empirical	n
block2019	mixed	7647	1056	other	saturation sampling from census, maildrops, phone calls, news and social media	n	Victoria, Australia	both	n	y	n	n	n	survey part of mixed method longitudinal	attachment to environment	survey part of mixed method longitudinal	post-traumatic growth		latent profile analysis	positive		post-traumatic growth found to be lower in the group with weak attachment to the environment	n/a	n/a	n/a	n/a	empirical	n
block2019	mixed	7647	1056	other	saturation sampling from census, maildrops, phone calls, news and social media	n	Victoria, Australia	both	n	y	n	n	n	qualitative part of mixed method longitudinal	loss of natural environment	qualitative part of mixed method longitudinal	grief		latent profile analysis	other	qualitative results	loss of natural environment during wildfire caused grief	n/a	n/a	n/a	n/a	empirical	n
block2019	mixed	7647	1056	other	saturation sampling from census, maildrops, phone calls, news and social media	n	Victoria, Australia	both	n	y	n	n	n	qualitative part of mixed method longitudinal	renewal of natural environment	qualitative part of mixed method longitudinal	hope		latent profile analysis	other	qualitative results	renewal of natural environment after wildfire gave hope	n/a	n/a	n/a	n/a	empirical	n
brown2018b	Quantiative	adults 65 & over living in Miami-Dade County	249405	Other	drawn from US Centers for Medicare and Medicaid Services' beneficiary Summary File	y	US - Florida	both	n	n	y	y	cross sectional	exposure - vegetative presence	Census block level greeness (NDVI)	diagnosed (based on claim)	Alzheimer's disease	age, gender, race, neighbourhood income of individuals	three-level multilevel analysis (generalized linear model to the data by maximum likelihood estimation of the parameter)	negative		reduced risk of Alzheimer's disease for those living in blocks with more green compared to those with less		what types of greenery or vegation	not discussed	replicate across populations and locales; mediators (e.g. air/noise pollution) and moderators of the association	empirical	n
brown2018b	Quantiative	adults 65 & over living in Miami-Dade County	249405	Other	drawn from US Medicare beneficiaries	y	US - Florida	both	n	n	y	y	cross sectional	exposure - vegetative presence	Census block level greeness (NDVI)	diagnosed (based on claim)	depression	age, gender, race, neighbourhood income of individuals	three-level multilevel analysis (generalized linear model to the data by maximum likelihood estimation of the parameter)	negative		reduced risk of depression for those living in blocks with more green compared to those with less; there was a greater effect for those living in lower-income neighbourhoods		what types of greenery or vegation effects depression rates particularly amongst those in lower-income neighbourhoods	not discussed	not discussed	empirical	n
brown2019d	Quantiative	school students in grades 7-12	3070	convenience (students)	Data collected from whole classes (with opt out available), carried out by schools	n	Fort McMurray, Alberta, Canada	both	n	y	n	n	cross sectional survey 18 months after wildfire evacuation event	Wildfire and evacuation occurred; questionnaire 18 months later	Impacted by fire (vs. no impact). Presence of an impact determined by whether children were in area during the wildfire, evacuated because of it, saw the fire in person, or home destroyed.	questionnaire	PTSD score - Child PTSD Symptom Scale (CPSS, 19 items)		Permutation testing (non-parametric) for differences between groups	null		No difference between groups					empirical	n
brown2019d	Quantiative	school students in grades 7-12	3070	convenience (students)	Data collected from whole classes (with opt out available), carried out by schools	n	Fort McMurray, Alberta, Canada	both	n	y	n	n	cross sectional survey 18 months after wildfire evacuation event	Wildfire and evacuation occurred; questionnaire 18 months later	Impacted by fire (vs. no impact). Presence of an impact determined by whether children were in area during the wildfire, evacuated because of it, saw the fire in person, or home destroyed.	questionnaire	Probable PTSD diagnosis (Child PTSD Symptom Scale [CPSS, 19 items]), cutoff score applied to indicate PTSD		Permutation testing (non-parametric) for differences between groups	null		No difference between groups					empirical	n
brown2019d	Quantiative	school students in grades 7-12	3070	convenience (students)	Data collected from whole classes (with opt out available), carried out by schools	n	Fort McMurray, Alberta, Canada	both	n	y	n	n	cross sectional survey 18 months after wildfire evacuation event	Wildfire and evacuation occurred; questionnaire 18 months later	Impacted by fire (vs. no impact). Presence of an impact determined by whether children were in area during the wildfire, evacuated because of it, saw the fire in person, or home destroyed.	questionnaire	Depression mean score - PHQ-A (Patient Health Questionnaire, Adolescent version, 11 items) measuring symptoms of depression		Permutation testing (non-parametric) for differences between groups	null		No difference between groups					empirical	n		Included other mental health/wellbeing related outcomes - tobacco and substance use, resilience - but I have not included those as considering out of scope
brown2019d	Quantiative	school students in grades 7-12	3070	convenience (students)	Data collected from whole classes (with opt out available), carried out by schools	n	Fort McMurray, Alberta, Canada	both	n	y	n	n	cross sectional survey 18 months after wildfire evacuation event	Wildfire and evacuation occurred; questionnaire 18 months later	Impacted by fire (vs. no impact). Presence of an impact determined by whether children were in area during the wildfire, evacuated because of it, saw the fire in person, or home destroyed.	questionnaire	Probable depression diagnosis - PHQ-A (Patient Health Questionnaire, Adolescent version, 11 items) measuring symptoms of depression, cutoff score applied to indicate depression		Permutation testing (non-parametric) for differences between groups	null		No difference between groups					empirical	n
brown2019d	Quantiative	school students in grades 7-12	3070	convenience (students)	Data collected from whole classes (with opt out available), carried out by schools	n	Fort McMurray, Alberta, Canada	both	n	y	n	n	cross sectional survey 18 months after wildfire evacuation event	Wildfire and evacuation occurred; questionnaire 18 months later	Impacted by fire (vs. no impact). Presence of an impact determined by whether children were in area during the wildfire, evacuated because of it, saw the fire in person, or home destroyed.	questionnaire	Probable moderately severe depression diagnosis - PHQ-A (Patient Health Questionnaire, Adolescent version, 11 items) measuring symptoms of depression, cutoff score applied to indicate depression		Permutation testing (non-parametric) for differences between groups	null		No difference between groups					empirical	n
brown2019d	Quantiative	school students in grades 7-12	3070	convenience (students)	Data collected from whole classes (with opt out available), carried out by schools	n	Fort McMurray, Alberta, Canada	both	n	y	n	n	cross sectional survey 18 months after wildfire evacuation event	Wildfire and evacuation occurred; questionnaire 18 months later	Impacted by fire (vs. no impact). Presence of an impact determined by whether children were in area during the wildfire, evacuated because of it, saw the fire in person, or home destroyed.	questionnaire	Suicidal thinking (dichotomous measure, using 2 items of PHQ-A - Patient Health Questionnaire, Adolescent version)		Permutation testing (non-parametric) for differences between groups	null		No difference between groups					empirical	n
brown2019d	Quantiative	school students in grades 7-12	3070	convenience (students)	Data collected from whole classes (with opt out available), carried out by schools	n	Fort McMurray, Alberta, Canada	both	n	y	n	n	cross sectional survey 18 months after wildfire evacuation event	Wildfire and evacuation occurred; questionnaire 18 months later	Impacted by fire (vs. no impact). Presence of an impact determined by whether children were in area during the wildfire, evacuated because of it, saw the fire in person, or home destroyed.	questionnaire	Anxiety score - HADS (Hospital Anxiety and Depression Scale, 7 items anxiety subscale only) measuring symptoms of anxiety		Permutation testing (non-parametric) for differences between groups	null		No difference between groups					empirical	n		Included other mental health/wellbeing related outcomes - tobacco and substance use, resilience - but I have not included those as considering out of scope
brown2019d	Quantiative	school students in grades 7-12	3070	convenience (students)	Data collected from whole classes (with opt out available), carried out by schools	n	Fort McMurray, Alberta, Canada	both	n	y	n	n	cross sectional survey 18 months after wildfire evacuation event	Wildfire and evacuation occurred; questionnaire 18 months later	Impacted by fire (vs. no impact). Presence of an impact determined by whether children were in area during the wildfire, evacuated because of it, saw the fire in person, or home destroyed.	questionnaire	Probable anxiety diagnosis - HADS (Hospital Anxiety and Depression Scale, 7 items anxiety subscale only) measuring symptoms of anxiety, cutoff score applied to indicated anxiety		Permutation testing (non-parametric) for differences between groups	null		No difference between groups					empirical	n
brown2019d	Quantiative	school students in grades 7-12	3070	convenience (students)	Data collected from whole classes (with opt out available), carried out by schools	n	Fort McMurray, Alberta, Canada	both	n	y	n	n	cross sectional survey 18 months after wildfire evacuation event	Wildfire and evacuation occurred; questionnaire 18 months later	Impacted by fire (vs. no impact). Presence of an impact determined by whether children were in area during the wildfire, evacuated because of it, saw the fire in person, or home destroyed.	questionnaire	Rosenberg Self-Esteem scale score (10 items)		Permutation testing (non-parametric) for differences between groups	null		No difference between groups					empirical	n		Included other mental health/wellbeing related outcomes - tobacco and substance use, resilience - but I have not included those as considering out of scope
brown2019d	Quantiative	school students in grades 7-12	3070	convenience (students)	Data collected from whole classes (with opt out available), carried out by schools	n	Fort McMurray, Alberta, Canada	both	n	y	n	n	cross sectional survey 18 months after wildfire evacuation event	Wildfire and evacuation occurred; questionnaire 18 months later	Impacted by fire (vs. no impact). Presence of an impact determined by whether children were in area during the wildfire, evacuated because of it, saw the fire in person, or home destroyed.	questionnaire	Kidscreen Questionnaire - Quality of life score (11 items)		Permutation testing (non-parametric) for differences between groups	null		No difference between groups					empirical	n		Included other mental health/wellbeing related outcomes - tobacco and substance use, resilience - but I have not included those as considering out of scope
brown2019d	Quantiative	school students in grades 7-12	3070	convenience (students)	Data collected from whole classes (with opt out available), carried out by schools	n	Fort McMurray, Alberta, Canada	both	n	y	n	n	cross sectional survey 18 months after wildfire evacuation event	Wildfire and evacuation occurred; questionnaire 18 months later	Present during fire (vs not present)	questionnaire	PTSD score - Child PTSD Symptom Scale (CPSS, 19 items)		Permutation testing (non-parametric) for differences between groups	null		No difference between groups					empirical	n
brown2019d	Quantiative	school students in grades 7-12	3070	convenience (students)	Data collected from whole classes (with opt out available), carried out by schools	n	Fort McMurray, Alberta, Canada	both	n	y	n	n	cross sectional survey 18 months after wildfire evacuation event	Wildfire and evacuation occurred; questionnaire 18 months later	Present during fire (vs not present)	questionnaire	Probable PTSD diagnosis (Child PTSD Symptom Scale [CPSS, 19 items]), cutoff score applied to indicate PTSD		Permutation testing (non-parametric) for differences between groups	null		No difference between groups					empirical	n
brown2019d	Quantiative	school students in grades 7-12	3070	convenience (students)	Data collected from whole classes (with opt out available), carried out by schools	n	Fort McMurray, Alberta, Canada	both	n	y	n	n	cross sectional survey 18 months after wildfire evacuation event	Wildfire and evacuation occurred; questionnaire 18 months later	Present during fire (vs not present)	questionnaire	Depression mean score - PHQ-A (Patient Health Questionnaire, Adolescent version, 11 items) measuring symptoms of depression		Permutation testing (non-parametric) for differences between groups	null		No difference between groups					empirical	n		Included other mental health/wellbeing related outcomes - tobacco and substance use, resilience - but I have not included those as considering out of scope
brown2019d	Quantiative	school students in grades 7-12	3070	convenience (students)	Data collected from whole classes (with opt out available), carried out by schools	n	Fort McMurray, Alberta, Canada	both	n	y	n	n	cross sectional survey 18 months after wildfire evacuation event	Wildfire and evacuation occurred; questionnaire 18 months later	Present during fire (vs not present)	questionnaire	Probable depression diagnosis - PHQ-A (Patient Health Questionnaire, Adolescent version, 11 items) measuring symptoms of depression, cutoff score applied to indicate depression		Permutation testing (non-parametric) for differences between groups	null		No difference between groups					empirical	n
brown2019d	Quantiative	school students in grades 7-12	3070	convenience (students)	Data collected from whole classes (with opt out available), carried out by schools	n	Fort McMurray, Alberta, Canada	both	n	y	n	n	cross sectional survey 18 months after wildfire evacuation event	Wildfire and evacuation occurred; questionnaire 18 months later	Present during fire (vs not present)	questionnaire	Probable moderately severe depression diagnosis - PHQ-A (Patient Health Questionnaire, Adolescent version, 11 items) measuring symptoms of depression, cutoff score applied to indicate depression		Permutation testing (non-parametric) for differences between groups	null		No difference between groups					empirical	n
brown2019d	Quantiative	school students in grades 7-12	3070	convenience (students)	Data collected from whole classes (with opt out available), carried out by schools	n	Fort McMurray, Alberta, Canada	both	n	y	n	n	cross sectional survey 18 months after wildfire evacuation event	Wildfire and evacuation occurred; questionnaire 18 months later	Present during fire (vs not present)	questionnaire	Suicidal thinking (dichotomous measure, using 2 items of PHQ-A - Patient Health Questionnaire, Adolescent version)		Permutation testing (non-parametric) for differences between groups	positive		Children present in area during the wildfire were more likely to report suicidal thinking					empirical	n
brown2019d	Quantiative	school students in grades 7-12	3070	convenience (students)	Data collected from whole classes (with opt out available), carried out by schools	n	Fort McMurray, Alberta, Canada	both	n	y	n	n	cross sectional survey 18 months after wildfire evacuation event	Wildfire and evacuation occurred; questionnaire 18 months later	Present during fire (vs not present)	questionnaire	Anxiety score - HADS (Hospital Anxiety and Depression Scale, 7 items anxiety subscale only) measuring symptoms of anxiety		Permutation testing (non-parametric) for differences between groups	null		No difference between groups					empirical	n		Included other mental health/wellbeing related outcomes - tobacco and substance use, resilience - but I have not included those as considering out of scope
brown2019d	Quantiative	school students in grades 7-12	3070	convenience (students)	Data collected from whole classes (with opt out available), carried out by schools	n	Fort McMurray, Alberta, Canada	both	n	y	n	n	cross sectional survey 18 months after wildfire evacuation event	Wildfire and evacuation occurred; questionnaire 18 months later	Present during fire (vs not present)	questionnaire	Probable anxiety diagnosis - HADS (Hospital Anxiety and Depression Scale, 7 items anxiety subscale only) measuring symptoms of anxiety, cutoff score applied to indicated anxiety		Permutation testing (non-parametric) for differences between groups	null		No difference between groups					empirical	n
brown2019d	Quantiative	school students in grades 7-12	3070	convenience (students)	Data collected from whole classes (with opt out available), carried out by schools	n	Fort McMurray, Alberta, Canada	both	n	y	n	n	cross sectional survey 18 months after wildfire evacuation event	Wildfire and evacuation occurred; questionnaire 18 months later	Present during fire (vs not present)	questionnaire	Rosenberg Self-Esteem scale score (10 items)		Permutation testing (non-parametric) for differences between groups	null		No difference between groups					empirical	n		Included other mental health/wellbeing related outcomes - tobacco and substance use, resilience - but I have not included those as considering out of scope
brown2019d	Quantiative	school students in grades 7-12	3070	convenience (students)	Data collected from whole classes (with opt out available), carried out by schools	n	Fort McMurray, Alberta, Canada	both	n	y	n	n	cross sectional survey 18 months after wildfire evacuation event	Wildfire and evacuation occurred; questionnaire 18 months later	Present during fire (vs not present)	questionnaire	Kidscreen Questionnaire - Quality of life score (11 items)		Permutation testing (non-parametric) for differences between groups	null		No difference between groups					empirical	n		Included other mental health/wellbeing related outcomes - tobacco and substance use, resilience - but I have not included those as considering out of scope
brown2019d	Quantiative	school students in grades 7-12	3070	convenience (students)	Data collected from whole classes (with opt out available), carried out by schools	n	Fort McMurray, Alberta, Canada	both	n	y	n	n	cross sectional survey 18 months after wildfire evacuation event	Wildfire and evacuation occurred; questionnaire 18 months later	Personally witnessed fire (vs not personally witnessed)	questionnaire	PTSD score - Child PTSD Symptom Scale (CPSS, 19 items)		Permutation testing (non-parametric) for differences between groups	positive		Those who had witnessed the fire had significantly higher PTSD scale scores					empirical	n
brown2019d	Quantiative	school students in grades 7-12	3070	convenience (students)	Data collected from whole classes (with opt out available), carried out by schools	n	Fort McMurray, Alberta, Canada	both	n	y	n	n	cross sectional survey 18 months after wildfire evacuation event	Wildfire and evacuation occurred; questionnaire 18 months later	Personally witnessed fire (vs not personally witnessed)	questionnaire	Probable PTSD diagnosis (Child PTSD Symptom Scale [CPSS, 19 items]), cutoff score applied to indicate PTSD		Permutation testing (non-parametric) for differences between groups	positive		Those who had witnessed the fire were significantly more likely to score above threshold for PTSD diagnosis					empirical	n
brown2019d	Quantiative	school students in grades 7-12	3070	convenience (students)	Data collected from whole classes (with opt out available), carried out by schools	n	Fort McMurray, Alberta, Canada	both	n	y	n	n	cross sectional survey 18 months after wildfire evacuation event	Wildfire and evacuation occurred; questionnaire 18 months later	Personally witnessed fire (vs not personally witnessed)	questionnaire	Depression mean score - PHQ-A (Patient Health Questionnaire, Adolescent version, 11 items) measuring symptoms of depression		Permutation testing (non-parametric) for differences between groups	positive		Those who had witnessed the fire had signficantly higher depression scale scores					empirical	n		Included other mental health/wellbeing related outcomes - tobacco and substance use, resilience - but I have not included those as considering out of scope
brown2019d	Quantiative	school students in grades 7-12	3070	convenience (students)	Data collected from whole classes (with opt out available), carried out by schools	n	Fort McMurray, Alberta, Canada	both	n	y	n	n	cross sectional survey 18 months after wildfire evacuation event	Wildfire and evacuation occurred; questionnaire 18 months later	Personally witnessed fire (vs not personally witnessed)	questionnaire	Probable depression diagnosis - PHQ-A (Patient Health Questionnaire, Adolescent version, 11 items) measuring symptoms of depression, cutoff score applied to indicate depression		Permutation testing (non-parametric) for differences between groups	positive		Those who had witnessed the fire were significantly more likely to score above threshold for depression diagnosis					empirical	n
brown2019d	Quantiative	school students in grades 7-12	3070	convenience (students)	Data collected from whole classes (with opt out available), carried out by schools	n	Fort McMurray, Alberta, Canada	both	n	y	n	n	cross sectional survey 18 months after wildfire evacuation event	Wildfire and evacuation occurred; questionnaire 18 months later	Personally witnessed fire (vs not personally witnessed)	questionnaire	Probable moderately severe depression diagnosis - PHQ-A (Patient Health Questionnaire, Adolescent version, 11 items) measuring symptoms of depression, cutoff score applied to indicate depression		Permutation testing (non-parametric) for differences between groups	positive		Those who had witnessed the fire were significantly more likely to score above threshold for moderately severe depression diagnosis					empirical	n
brown2019d	Quantiative	school students in grades 7-12	3070	convenience (students)	Data collected from whole classes (with opt out available), carried out by schools	n	Fort McMurray, Alberta, Canada	both	n	y	n	n	cross sectional survey 18 months after wildfire evacuation event	Wildfire and evacuation occurred; questionnaire 18 months later	Personally witnessed fire (vs not personally witnessed)	questionnaire	Suicidal thinking (dichotomous measure, using 2 items of PHQ-A - Patient Health Questionnaire, Adolescent version)		Permutation testing (non-parametric) for differences between groups	positive		Those who had witnessed the fire were significantly more likely to report suidical thinking					empirical	n
brown2019d	Quantiative	school students in grades 7-12	3070	convenience (students)	Data collected from whole classes (with opt out available), carried out by schools	n	Fort McMurray, Alberta, Canada	both	n	y	n	n	cross sectional survey 18 months after wildfire evacuation event	Wildfire and evacuation occurred; questionnaire 18 months later	Personally witnessed fire (vs not personally witnessed)	questionnaire	Anxiety score - HADS (Hospital Anxiety and Depression Scale, 7 items anxiety subscale only) measuring symptoms of anxiety		Permutation testing (non-parametric) for differences between groups	positive		Those who had witnessed the fire had significantly higher anxiety scale scores					empirical	n		Included other mental health/wellbeing related outcomes - tobacco and substance use, resilience - but I have not included those as considering out of scope
brown2019d	Quantiative	school students in grades 7-12	3070	convenience (students)	Data collected from whole classes (with opt out available), carried out by schools	n	Fort McMurray, Alberta, Canada	both	n	y	n	n	cross sectional survey 18 months after wildfire evacuation event	Wildfire and evacuation occurred; questionnaire 18 months later	Personally witnessed fire (vs not personally witnessed)	questionnaire	Probable anxiety diagnosis - HADS (Hospital Anxiety and Depression Scale, 7 items anxiety subscale only) measuring symptoms of anxiety, cutoff score applied to indicated anxiety		Permutation testing (non-parametric) for differences between groups	positive		Those who had witnessed the fire were significantly more likely to score above threshold for anxiety diagnosis					empirical	n
brown2019d	Quantiative	school students in grades 7-12	3070	convenience (students)	Data collected from whole classes (with opt out available), carried out by schools	n	Fort McMurray, Alberta, Canada	both	n	y	n	n	cross sectional survey 18 months after wildfire evacuation event	Wildfire and evacuation occurred; questionnaire 18 months later	Personally witnessed fire (vs not personally witnessed)	questionnaire	Rosenberg Self-Esteem scale score (10 items)		Permutation testing (non-parametric) for differences between groups	null		No difference between groups in terms of self-esteem					empirical	n		Included other mental health/wellbeing related outcomes - tobacco and substance use, resilience - but I have not included those as considering out of scope
brown2019d	Quantiative	school students in grades 7-12	3070	convenience (students)	Data collected from whole classes (with opt out available), carried out by schools	n	Fort McMurray, Alberta, Canada	both	n	y	n	n	cross sectional survey 18 months after wildfire evacuation event	Wildfire and evacuation occurred; questionnaire 18 months later	Personally witnessed fire (vs not personally witnessed)	questionnaire	Kidscreen Questionnaire - Quality of life score (11 items)		Permutation testing (non-parametric) for differences between groups	negative		Those who had witnessed the fire had significantly lower quality of life scores					empirical	n		Included other mental health/wellbeing related outcomes - tobacco and substance use, resilience - but I have not included those as considering out of scope
brown2019d	Quantiative	school students in grades 7-12	3070	convenience (students)	Data collected from whole classes (with opt out available), carried out by schools	n	Fort McMurray, Alberta, Canada	both	n	y	n	n	cross sectional survey 18 months after wildfire evacuation event	Wildfire and evacuation occurred; questionnaire 18 months later	Home destroyed by fire (vs home not destroyed)	questionnaire	PTSD score - Child PTSD Symptom Scale (CPSS, 19 items)		Permutation testing (non-parametric) for differences between groups	positive		Those who hadhome destroyed had significantly higher PTSD scale scores					empirical	n
brown2019d	Quantiative	school students in grades 7-12	3070	convenience (students)	Data collected from whole classes (with opt out available), carried out by schools	n	Fort McMurray, Alberta, Canada	both	n	y	n	n	cross sectional survey 18 months after wildfire evacuation event	Wildfire and evacuation occurred; questionnaire 18 months later	Home destroyed by fire (vs home not destroyed)	questionnaire	Probable PTSD diagnosis (Child PTSD Symptom Scale [CPSS, 19 items]), cutoff score applied to indicate PTSD		Permutation testing (non-parametric) for differences between groups	positive		Those who had home destroyed were significantly more likely to score above threshold for PTSD diagnosis					empirical	n
brown2019d	Quantiative	school students in grades 7-12	3070	convenience (students)	Data collected from whole classes (with opt out available), carried out by schools	n	Fort McMurray, Alberta, Canada	both	n	y	n	n	cross sectional survey 18 months after wildfire evacuation event	Wildfire and evacuation occurred; questionnaire 18 months later	Home destroyed by fire (vs home not destroyed)	questionnaire	Depression mean score - PHQ-A (Patient Health Questionnaire, Adolescent version, 11 items) measuring symptoms of depression		Permutation testing (non-parametric) for differences between groups	positive		Those who had witnessed the fire had signficantly higher depression scale scores					empirical	n		Included other mental health/wellbeing related outcomes - tobacco and substance use, resilience - but I have not included those as considering out of scope
brown2019d	Quantiative	school students in grades 7-12	3070	convenience (students)	Data collected from whole classes (with opt out available), carried out by schools	n	Fort McMurray, Alberta, Canada	both	n	y	n	n	cross sectional survey 18 months after wildfire evacuation event	Wildfire and evacuation occurred; questionnaire 18 months later	Home destroyed by fire (vs home not destroyed)	questionnaire	Probable depression diagnosis - PHQ-A (Patient Health Questionnaire, Adolescent version, 11 items) measuring symptoms of depression, cutoff score applied to indicate depression		Permutation testing (non-parametric) for differences between groups	null		No difference between groups					empirical	n
brown2019d	Quantiative	school students in grades 7-12	3070	convenience (students)	Data collected from whole classes (with opt out available), carried out by schools	n	Fort McMurray, Alberta, Canada	both	n	y	n	n	cross sectional survey 18 months after wildfire evacuation event	Wildfire and evacuation occurred; questionnaire 18 months later	Home destroyed by fire (vs home not destroyed)	questionnaire	Probable moderately severe depression diagnosis - PHQ-A (Patient Health Questionnaire, Adolescent version, 11 items) measuring symptoms of depression, cutoff score applied to indicate depression		Permutation testing (non-parametric) for differences between groups	positive		Those who had home destroyed were significantly more likely to score above threshold for moderately severe depression diagnosis					empirical	n
brown2019d	Quantiative	school students in grades 7-12	3070	convenience (students)	Data collected from whole classes (with opt out available), carried out by schools	n	Fort McMurray, Alberta, Canada	both	n	y	n	n	cross sectional survey 18 months after wildfire evacuation event	Wildfire and evacuation occurred; questionnaire 18 months later	Home destroyed by fire (vs home not destroyed)	questionnaire	Suicidal thinking (dichotomous measure, using 2 items of PHQ-A - Patient Health Questionnaire, Adolescent version)		Permutation testing (non-parametric) for differences between groups	null		No difference between groups					empirical	n
brown2019d	Quantiative	school students in grades 7-12	3070	convenience (students)	Data collected from whole classes (with opt out available), carried out by schools	n	Fort McMurray, Alberta, Canada	both	n	y	n	n	cross sectional survey 18 months after wildfire evacuation event	Wildfire and evacuation occurred; questionnaire 18 months later	Home destroyed by fire (vs home not destroyed)	questionnaire	Anxiety score - HADS (Hospital Anxiety and Depression Scale, 7 items anxiety subscale only) measuring symptoms of anxiety		Permutation testing (non-parametric) for differences between groups	positive		Those who had home destroyed had significantly higher anxiety scale scores					empirical	n		Included other mental health/wellbeing related outcomes - tobacco and substance use, resilience - but I have not included those as considering out of scope
brown2019d	Quantiative	school students in grades 7-12	3070	convenience (students)	Data collected from whole classes (with opt out available), carried out by schools	n	Fort McMurray, Alberta, Canada	both	n	y	n	n	cross sectional survey 18 months after wildfire evacuation event	Wildfire and evacuation occurred; questionnaire 18 months later	Home destroyed by fire (vs home not destroyed)	questionnaire	Probable anxiety diagnosis - HADS (Hospital Anxiety and Depression Scale, 7 items anxiety subscale only) measuring symptoms of anxiety, cutoff score applied to indicated anxiety		Permutation testing (non-parametric) for differences between groups	positive		Those who had home destroyed were significantly more likely to score above threshold for anxiety diagnosis					empirical	n
brown2019d	Quantiative	school students in grades 7-12	3070	convenience (students)	Data collected from whole classes (with opt out available), carried out by schools	n	Fort McMurray, Alberta, Canada	both	n	y	n	n	cross sectional survey 18 months after wildfire evacuation event	Wildfire and evacuation occurred; questionnaire 18 months later	Home destroyed by fire (vs home not destroyed)	questionnaire	Rosenberg Self-Esteem scale score (10 items)		Permutation testing (non-parametric) for differences between groups	negative		Those who had home destroyed had significantly lower self esteem scores					empirical	n		Included other mental health/wellbeing related outcomes - tobacco and substance use, resilience - but I have not included those as considering out of scope
brown2019d	Quantiative	school students in grades 7-12	3070	convenience (students)	Data collected from whole classes (with opt out available), carried out by schools	n	Fort McMurray, Alberta, Canada	both	n	y	n	n	cross sectional survey 18 months after wildfire evacuation event	Wildfire and evacuation occurred; questionnaire 18 months later	Home destroyed by fire (vs home not destroyed)	questionnaire	Kidscreen Questionnaire - Quality of life score (11 items)		Permutation testing (non-parametric) for differences between groups	negative		Those who had home destroyed had significantly lower quality of life scores					empirical	n		Included other mental health/wellbeing related outcomes - tobacco and substance use, resilience - but I have not included those as considering out of scope
Buttke2012	Quantiative	households in counties considered affected by oil spill	208	cluster	2-stage probability cluster sampling to select sample of 210 households; 1st stage - 30 census blocks selected in each assessment area; 2nd stage - random selection of 7 households from each census block	y	USA - Mobile County Alabama	mh	n	y	n	n	1 year follow-up to survey conducted in 2010	Oil spill occurred 1 year prior (Deep Water Horizon)	presumed impact	household interview - Mobile	>/= 14 days mentally unhealthy days (from Behavioral Risk Factor Surveillance System (BRFSS)	social context, income following oil spill, economic impact of spill (i.e. change in income)	weighted cluster analysis & compared to 2010 initial survey following oil spill	other	decrease over time with income effect	proportion reporting >/= 14 mentally unhealthy days decreased from 22.8% in 2010 to 14.7% in 2011; those with decreased income 1-year on more likely to report mentally unhealthy days	not discussed	not discussed	not discussed	further investigation of factors contributing to decrease as current study cannot provide such insight	composite	n
buttke2012	Quantiative	Adults in Alabama and Mississippi	469	Other	Two stage, first selection of census block, then random within census block		Gulf coast, USA																					y	Paper only lists needs of people in affected counties, not analysis
Buttke2014	Quantiative	households in counties considered affected by oil spill	208	cluster	2-stage probability cluster sampling to select sample of 210 households; 1st stage - 30 census blocks selected in each assessment area; 2nd stage - random selection of 7 households from each census block	y	USA - Mobile County Alabama	both	n	y	n	n	1 year follow-up to survey conducted in 2010	Oil spill occurred 1 year prior (Deep Water Horizon)	presumed impact	household interview - Mobile	depressive symptoms (2 questions from Patient Health Q'anire [PHQ-2] module in BRFSS) [0-3 scale - higher is more depressed]	social context, income following oil spill	weighted cluster analysis & compared to 2010 initial survey following oil spill	other	decrease over time with income effect	proportion reporting depressive symptoms decreased from 24.2% in 2010 to 13.2% in 2011; those with decreased income 1-year on more likely to report depressive symptoms	not discussed	not discussed	not discussed	further investigation of factors contributing to decrease as current study cannot provide such insight	composite	n
Buttke2014	Quantiative	households in counties considered affected by oil spill	208	cluster	2-stage probability cluster sampling to select sample of 210 households; 1st stage - 30 census blocks selected in each assessment area; 2nd stage - random selection of 7 households from each census block	y	USA - Mobile County Alabama	mh	n	y	n	n	1 year follow-up to survey conducted in 2010	Oil spill occurred 1 year prior (Deep Water Horizon)	presumed impact	household interview - Mobile	Anxiety = 2 questions from Generalised Anxiety Disorder-2 (GAD-2) [0-3 scale; higher is more anxiety]	social context, income following oil spill	weighted cluster analysis & compared to 2010 initial survey following oil spill	other	decrease over time with income effect	proportion reporting anxiety decreased from 24.3% in 2010 to 20.3% in 2011; those with decreased income 1-year on more likely to report anxiety	not discussed	not discussed	not discussed	further investigation of factors contributing to decrease as current study cannot provide such insight	composite	n
Buttke2014	Quantiative	households in counties considered affected by oil spill	208	cluster	2-stage probability cluster sampling to select sample of 210 households; 1st stage - 30 census blocks selected in each assessment area; 2nd stage - random selection of 7 households from each census block	y	USA - Mobile County Alabama	mh	n	y	n	n	1 year follow-up to survey conducted in 2010	Oil spill occurred 1 year prior (Deep Water Horizon)	presumed impact	household interview - Mobile	money worries for rent / food (2 separate questions - combined here into single line for ease of reporting)	social context, income following oil spill	weighted cluster analysis & compared to 2010 initial survey following oil spill	other	decrease over time with income effect	non-sig decrease in proportion reporting always/usually worried/stressed about money for rent / food	not discussed	not discussed	not discussed	further investigation of factors contributing to decrease as current study cannot provide such insight	composite	n
Buttke2014	Quantiative	households in counties considered affected by oil spill	177	cluster	2-stage probability cluster sampling to select sample of 210 households; 1st stage - 30 census blocks selected in each assessment area; 2nd stage - random selection of 7 households from each census block	y	USA - Baldwin County Alabama	mh	n	y	n	n	1 year follow-up to survey conducted in 2010	Oil spill occurred 1 year prior (Deep Water Horizon)	presumed impact	household interview - Baldwin	>/= 14 days mentally unhealthy days (from Behavioral Risk Factor Surveillance System (BRFSS)	social context, income following oil spill	weighted cluster analysis & compared to 2010 initial survey following oil spill	other	decrease over time with income effect	proportion reporting >/= 14 mentally unhealthy days decreased from 16.3% in 2010 to 13.2% in 2011; those with decreased income 1-year on more likely to report mentally unhealthy days	not discussed	not discussed	not discussed	further investigation of factors contributing to decrease as current study cannot provide such insight	composite	n
Buttke2014	Quantiative	households in counties considered affected by oil spill	177	cluster	2-stage probability cluster sampling to select sample of 210 households; 1st stage - 30 census blocks selected in each assessment area; 2nd stage - random selection of 7 households from each census block	y	USA - Baldwin County Alabama	mh	n	y	n	n	1 year follow-up to survey conducted in 2010	Oil spill occurred 1 year prior (Deep Water Horizon)	presumed impact	household interview - Baldwin	depressive symptoms ( w questions from Patient Health Q'anire [PHQ-2] module in BRFSS) [0-3 scale - higher is more depressed]	social context, income following oil spill	weighted cluster analysis & compared to 2010 initial survey following oil spill	other	decrease over time with income effect	proportion depressive symptoms decreased from 15.4 in 2010 to 15.1 in 2011	not discussed	not discussed	not discussed	further investigation of factors contributing to decrease as current study cannot provide such insight	composite	n
Buttke2014	Quantiative	households in counties considered affected by oil spill	177	cluster	2-stage probability cluster sampling to select sample of 210 households; 1st stage - 30 census blocks selected in each assessment area; 2nd stage - random selection of 7 households from each census block	y	USA - Baldwin County Alabama	mh	n	y	n	n	1 year follow-up to survey conducted in 2010	Oil spill occurred 1 year prior (Deep Water Horizon)	presumed impact	household interview - Baldwin	Anxiety = 2 questions from Generalised Anxiety Disorder-2 (GAD-2) [0-3 scale; higher is more anxiety]	social context, income following oil spill	weighted cluster analysis & compared to 2010 initial survey following oil spill	other	decrease over time with income effect	proportion anxieity decreased from 21.4 in 2010 to 13.2 in 2011	not discussed	not discussed	not discussed	further investigation of factors contributing to decrease as current study cannot provide such insight	composite	n
Buttke2014	Quantiative	households in counties considered affected by oil spill	177	cluster	2-stage probability cluster sampling to select sample of 210 households; 1st stage - 30 census blocks selected in each assessment area; 2nd stage - random selection of 7 households from each census block	y	USA - Baldwin County Alabama	mh	n	y	n	n	1 year follow-up to survey conducted in 2010	Oil spill occurred 1 year prior (Deep Water Horizon)	presumed impact	household interview - Baldwin	money worries for rent / food (2 separate questions - combined here into single line for ease of reporting)	social context, income following oil spill	weighted cluster analysis & compared to 2010 initial survey following oil spill	other	decrease over time with income effect	non-sig decrease in proportion reporting always/usually worried/stressed about money for rent / food	not discussed	not discussed	not discussed	further investigation of factors contributing to decrease as current study cannot provide such insight	composite	n
Buttke2014	Quantiative	households in counties considered affected by oil spill	200	cluster	2-stage probability cluster sampling to select sample of 210 households; 1st stage - 30 census blocks selected in each assessment area; 2nd stage - random selection of 7 households from each census block	y	USA - Hancock, Harrison, Jackson Counties, Mississippi	mh	n	y	n	n	1 year follow-up to survey conducted in 2010	Oil spill occurred 1 year prior (Deep Water Horizon)	presumed impact	household interview - Mississippi	>/= 14 days mentally unhealthy days (from Behavioral Risk Factor Surveillance System (BRFSS)	social context, income following oil spill	weighted cluster analysis & compared to 2010 initial survey following oil spill	other	decrease over time with income effect	proportion >/= 14 mentally unhealthy days decreased from 22.1% in 2010 to 18.3% in 2011	not discussed	not discussed	not discussed	further investigation of factors contributing to decrease as current study cannot provide such insight	composite	n
Buttke2014	Quantiative	households in counties considered affected by oil spill	200	cluster	2-stage probability cluster sampling to select sample of 210 households; 1st stage - 30 census blocks selected in each assessment area; 2nd stage - random selection of 7 households from each census block	y	USA - Hancock, Harrison, Jackson Counties, Mississippi	mh	n	y	n	n	1 year follow-up to survey conducted in 2010	Oil spill occurred 1 year prior (Deep Water Horizon)	presumed impact	household interview - Mississippi	depressive symptoms ( w questions from Patient Health Q'anire [PHQ-2] module in BRFSS) [0-3 scale - higher is more depressed]	social context, income following oil spill	weighted cluster analysis & compared to 2010 initial survey following oil spill	other	decrease over time with income effect	proportion depressive symptoms decreased from 24.5% in 2010 to 15.1% in 2011; those with decreased income 1-year on more likely to report depresion	not discussed	not discussed	not discussed	further investigation of factors contributing to decrease as current study cannot provide such insight	composite	n
Buttke2014	Quantiative	households in counties considered affected by oil spill	200	cluster	2-stage probability cluster sampling to select sample of 210 households; 1st stage - 30 census blocks selected in each assessment area; 2nd stage - random selection of 7 households from each census block	y	USA - Hancock, Harrison, Jackson Counties, Mississippi	mh	n	y	n	n	1 year follow-up to survey conducted in 2010	Oil spill occurred 1 year prior (Deep Water Horizon)	presumed impact	household interview - Mississippi	Anxiety = 2 questions from Generalised Anxiety Disorder-2 (GAD-2) [0-3 scale; higher is more anxiety]	social context, income following oil spill	weighted cluster analysis & compared to 2010 initial survey following oil spill	other	decrease over time with income effect	proportion anxiety decreased from 31.5% in 2010 to 19.4% in 2011; those with decreased income 1-year on more likely to report anxiety	not discussed	not discussed	not discussed	further investigation of factors contributing to decrease as current study cannot provide such insight	composite	n
Buttke2014	Quantiative	households in counties considered affected by oil spill	200	cluster	2-stage probability cluster sampling to select sample of 210 households; 1st stage - 30 census blocks selected in each assessment area; 2nd stage - random selection of 7 households from each census block	y	USA - Hancock, Harrison, Jackson Counties, Mississippi	mh	n	y	n	n	1 year follow-up to survey conducted in 2010	Oil spill occurred 1 year prior (Deep Water Horizon)	presumed impact	household interview - Mississippi	money worries for rent / food (2 separate questions - combined here into single line for ease of reporting)	social context, income following oil spill	weighted cluster analysis & compared to 2010 initial survey following oil spill	other	decrease over time with income effect	non-sig decrease in proportion reporting always/usually worried/stressed about money for rent / food	not discussed	not discussed	not discussed	further investigation of factors contributing to decrease as current study cannot provide such insight	composite	n
caamano2011	quantitative	2066722	2066722	other	census	n - but it must be?	Corunna and Pontevedra, Gallicia, Spain	both	n	n	n	n	analytical, ecological, geographical temporal-cluster study	short-term exposure to wildfires	exposure to fire in municipality (no exposure, medium exposure, high exposure)	presence of anxiety	being prescribed anxiolytics hypnotics (NO5C and NO5B)	men, women, pensioners, non-pensioners	explorative analysis and additive models for time series	positive		There was found to be an increase in the number of men being prescribed anxiolytics-hypnotics in fire exposed municipalities	n/a	n/a	n/a	n/a	empirical	n
caamano2011	quantitative	2066722	2066722	other	census	n - but it must be?	Corunna and Pontevedra, Gallicia, Spain	both	n	n	n	n	analytical, ecological, geographical temporal-cluster study	short-term exposure to wildfires	exposure to fire in municipality (no exposure, medium exposure, high exposure)	presence of anxiety	being prescribed anxiolytics hypnotics (NO5C and NO5B)	men, women, pensioners, non-pensioners	explorative analysis and additive models for time series	null		There was found to be no significant change in the number of women being prescribed anxiolytics-hypnotics in fire exposed municipalities	n/a	n/a	n/a	n/a	empirical	n
cairnie2011	qualitative	45 in consultative forum, 45 students and 6 teachers		other	not reported	n	Rural schools in NSW, Australia	m/h	n	y	n	n	n	prolonged drought	affected by prolonged drought	interviews, consultative forum	worries about the future		not reported	positive	qualitative results	prolonged droughts lead children to worry about the future	n/a	n/a	n/a	n/a	empirical	n
cairnie2011	qualitative	45 in consultative forum, 45 students and 6 teachers		other	not reported	n	Rural schools in NSW, Australia	m/h	n	y	n	n	n	prolonged drought	affected by prolonged drought	interviews, consultative forum	worries about the community		not reported	positive	qualitative results	prolonged droughts lead children to worry about their communities	n/a	n/a	n/a	n/a	empirical	n
cairnie2011	qualitative	45 in consultative forum, 45 students and 6 teachers		other	not reported	n	Rural schools in NSW, Australia	m/h	n	y	n	n	n	prolonged drought	affected by prolonged drought	interviews, consultative forum	worries about money		not reported	positive	qualitative results	prolonged droughts lead children to worry about money	n/a	n/a	n/a	n/a	empirical	n
cairnie2011	qualitative	45 in consultative forum, 45 students and 6 teachers		other	not reported	n	Rural schools in NSW, Australia	m/h	n	y	n	n	n	prolonged drought	affected by prolonged drought	interviews, consultative forum	worries about family		not reported	positive	qualitative results	prolonged droughts lead children to worry about family	n/a	n/a	n/a	n/a	empirical	n
cairnie2011	qualitative	45 in consultative forum, 45 students and 6 teachers		other	not reported	n	Rural schools in NSW, Australia	m/h	n	y	n	n	n	prolonged drought	affected by prolonged drought	interviews, consultative forum	social isolation		not reported	positive	qualitative results	prolonged droughts lead children to be socially isolated	n/a	n/a	n/a	n/a	empirical	n
cairnie2011	qualitative	45 in consultative forum, 45 students and 6 teachers		other	not reported	n	Rural schools in NSW, Australia	m/h	n	y	n	n	n	prolonged drought	affected by prolonged drought	interviews, consultative forum	at risk of harm or abuse		not reported	positive	qualitative results	prolonged droughts lead children to be at risk of harm or abuse	n/a	n/a	n/a	n/a	empirical	n
cairnie2011	qualitative	45 in consultative forum, 45 students and 6 teachers		other	not reported	n	Rural schools in NSW, Australia	m/h	n	y	n	n	n	prolonged drought	affected by prolonged drought	interviews, consultative forum	unrecognised distress		not reported	positive	qualitative results	prolonged droughts lead children to face unrecognised distress	n/a	n/a	n/a	n/a	empirical	n
cairnie2011	qualitative	45 in consultative forum, 45 students and 6 teachers		other	not reported	n	Rural schools in NSW, Australia	m/h	n	y	n	n	n	prolonged drought	affected by prolonged drought	interviews, consultative forum	barriers to accessing services		not reported	positive	qualitative results	prolonged droughts lead children to face barriers to accessing (mental health) services	n/a	n/a	n/a	n/a	empirical	n
cairnie2011	qualitative	45 in consultative forum, 45 students and 6 teachers		other	not reported	n	Rural schools in NSW, Australia	m/h	n	y	n	n	n	prolonged drought	affected by prolonged drought	interviews, consultative forum	health and wellbeing		not reported	positive	qualitative results	prolonged droughts lead children to face harm to their health and wellbeing	n/a	n/a	n/a	n/a	empirical	n
canan2020																												y	Results grouped flooding with mass shootings, not presented sperately for different disaster types
caramanica2015	Quantiative	Adults experiencing 9/11 and Hurricane Sandy	4137	Other	Taken from other longtitudinal cohort study	n	New York, USA	mh	n	y	n	n	n	Hurricane exposure		questionnaire	PTSD checklist	knowledge of evacuation zone status, home evacuation, environmental exposures, loss of service, flood damage, cost of home repairs, activities related to storm clear up, physical and mental health, exposure to 9/11, psychosocial resources,	Adjusted odds ratio	positive		Odds of PTSD increased with increased exposures to Sandy related traumas from 1-2 to 5-7. Higher PTSD if histroy of 9/11 PTSD or low social support.					empirical	n
cerleti2020	Quantiative	adults	2035	Other	drawn from 2nd & 3rd wave of Swiss Cohort Study on Air Pollution and Lung/Heatr Diseases in adults	n	Switzerland	both	n	n	n	y		noise exposure - aircraft	air - annual mean noise levels at residence (modelled using standard Swiss noise models)	self report	mental health perception subscale of SF-36 - high score = better mental health	age, sex, education, smoking, alcohol, physical actvitiy, body mass index; neighborhood socio-economic status, greenness index (NDVI) within 500m buffer, outdoor nitrogen dioxide	multiple quantile regression	null		no association between aircraft noise exposure and perceived mental health	not discussed	not discussed	not discussed	inclusion of noise sensitivity at multiple time points in longitudinal study; mechanisms underlying the association	empirical	n
cerleti2020	Quantiative	adults	2035	Other	drawn from 2nd & 3rd wave of Swiss Cohort Study on Air Pollution and Lung/Heatr Diseases in adults	n	Switzerland	both	n	n	n	y		noise exposure - road	car - annual mean noise levels at residence (modelled using standard Swiss noise models)	self report	mental health perception subscale of SF-36 - high score = better mental health	age, sex, education, smoking, alcohol, physical actvitiy, body mass index; neighborhood socio-economic status, greenness index (NDVI) within 500m buffer, outdoor nitrogen dioxide	multiple quantile regression	null		no association between road noise levels and perceived mental health	not discussed	not discussed	not discussed	inclusion of noise sensitivity at multiple time points in longitudinal study; mechanisms underlying the association	empirical	n
cerleti2020	Quantiative	adults	2035	Other	drawn from 2nd & 3rd wave of Swiss Cohort Study on Air Pollution and Lung/Heatr Diseases in adults	n	Switzerland	both	n	n	n	y		noise exposure - train	train - annual mean noise levels at residence (modelled using standard Swiss noise models)	self report	mental health perception subscale of SF-36 - high score = better mental health	age, sex, education, smoking, alcohol, physical actvitiy, body mass index; neighborhood socio-economic status, greenness index (NDVI) within 500m buffer, outdoor nitrogen dioxide	multiple quantile regression	null		no association between rail noise levels and perceived mental health	not discussed	not discussed	not discussed	inclusion of noise sensitivity at multiple time points in longitudinal study; mechanisms underlying the association	empirical	n
cerleti2020	Quantiative	adults	2035	Other	drawn from 2nd & 3rd wave of Swiss Cohort Study on Air Pollution and Lung/Heatr Diseases in adults	n	Switzerland	both	n	n	n	y		self report	transportation noise annoyance (ICEBEN scale)	self report	mental health perception subscale of SF-36 - high score = better mental health	age, sex, education, smoking, alcohol, physical actvitiy, body mass index; neighborhood socio-economic status, greenness index (NDVI) within 500m buffer, outdoor nitrogen dioxide	multiple quantile regression	negative		higher reported tertile tranport noise annoyance associated with lower perceived mental health	not discussed	not discussed	not discussed	inclusion of noise sensitivity at multiple time points in longitudinal study; mechanisms underlying the association	empirical	n
cerleti2020	Quantiative	adults	2035	Other	drawn from 2nd & 3rd wave of Swiss Cohort Study on Air Pollution and Lung/Heatr Diseases in adults	n	Switzerland	both	n	n	n	y		self report	noise sensitivity (10 questions)	self report	mental health perception subscale of SF-36 - high score = better mental health	age, sex, education, smoking, alcohol, physical actvitiy, body mass index; neighborhood socio-economic status, greenness index (NDVI) within 500m buffer, outdoor nitrogen dioxide	multiple quantile regression	negative		higher reported noise sensitivity associated with lower mental health	not discussed	not discussed	not discussed	inclusion of noise sensitivity at multiple time points in longitudinal study; mechanisms underlying the association	empirical	n
cerleti2020	Quantiative	adults	2035	Other	drawn from 2nd & 3rd wave of Swiss Cohort Study on Air Pollution and Lung/Heatr Diseases in adults	n	Switzerland	both	n	n	n	y		noise exposure - aircraft	air - annual mean noise levels at residence (modelled using standard Swiss noise models)	self report	vitality subscale of SF-36 - high score = better mental health	age, sex, education, smoking, alcohol, physical actvitiy, body mass index; neighborhood socio-economic status, greenness index (NDVI) within 500m buffer, outdoor nitrogen dioxide	multiple quantile regression	null		no association between aircraft noise levels and vitality levels	not discussed	not discussed	not discussed	inclusion of noise sensitivity at multiple time points in longitudinal study; mechanisms underlying the association	empirical	n
cerleti2020	Quantiative	adults	2035	Other	drawn from 2nd & 3rd wave of Swiss Cohort Study on Air Pollution and Lung/Heatr Diseases in adults	n	Switzerland	both	n	n	n	y		noise exposure - road	car - annual mean noise levels at residence (modelled using standard Swiss noise models)	self report	vitality subscale of SF-36 - high score = better mental health	age, sex, education, smoking, alcohol, physical actvitiy, body mass index; neighborhood socio-economic status, greenness index (NDVI) within 500m buffer, outdoor nitrogen dioxide	multiple quantile regression	null		no association between road noise levels and vitality levels	not discussed	not discussed	not discussed	inclusion of noise sensitivity at multiple time points in longitudinal study; mechanisms underlying the association	empirical	n
cerleti2020	Quantiative	adults	2035	Other	drawn from 2nd & 3rd wave of Swiss Cohort Study on Air Pollution and Lung/Heatr Diseases in adults	n	Switzerland	both	n	n	n	y		noise exposure - train	train - annual mean noise levels at residence (modelled using standard Swiss noise models)	self report	vitality subscale of SF-36 - high score = better mental health	age, sex, education, smoking, alcohol, physical actvitiy, body mass index; neighborhood socio-economic status, greenness index (NDVI) within 500m buffer, outdoor nitrogen dioxide	multiple quantile regression	negative		higher rail noise assocaited with lower vitality which held when also accounting for noise sensitivity and noise annoyance	not discussed	not discussed	not discussed	inclusion of noise sensitivity at multiple time points in longitudinal study; mechanisms underlying the association	empirical	n
cerleti2020	Quantiative	adults	2035	Other	drawn from 2nd & 3rd wave of Swiss Cohort Study on Air Pollution and Lung/Heatr Diseases in adults	n	Switzerland	both	n	n	n	y		self report	transportation noise annoyance (ICEBEN scale)	self report	vitality subscale of SF-36 - high score = better mental health	age, sex, education, smoking, alcohol, physical actvitiy, body mass index; neighborhood socio-economic status, greenness index (NDVI) within 500m buffer, outdoor nitrogen dioxide	multiple quantile regression	negative		higher reported tertile tranport noise annoyance associated with lower vitality	not discussed	not discussed	not discussed	inclusion of noise sensitivity at multiple time points in longitudinal study; mechanisms underlying the association	empirical	n
cerleti2020	Quantiative	adults	2035	Other	drawn from 2nd & 3rd wave of Swiss Cohort Study on Air Pollution and Lung/Heatr Diseases in adults	n	Switzerland	both	n	n	n	y		self report	noise sensitivity (10 questions)	self report	vitality subscale of SF-36 - high score = better mental health	age, sex, education, smoking, alcohol, physical actvitiy, body mass index; neighborhood socio-economic status, greenness index (NDVI) within 500m buffer, outdoor nitrogen dioxide	multiple quantile regression	negative		higher reported noise sensitivity associated with lower vitality	not discussed	not discussed	not discussed	inclusion of noise sensitivity at multiple time points in longitudinal study; mechanisms underlying the association	empirical	n
chan2018	quantitative	7150288	44600	other	complete records for hospital admission	n - but it must be?	Hong Kong: Public hospital admissions	both	n	n	n	y	n	ambient temperature	mean temperature	Principle diagnosis of mental disorder on hospital admission	persistent mental disorder		generalised additive model	null	u-shaped	U-shaped relationship found between temperature and persistent mental disorder but not significant	Future studies for sub-diseases and understanding the biological mechanisms are warranted	Future studies for sub-diseases and understanding the biological mechanisms are warranted	Future studies for sub-diseases and understanding the biological mechanisms are warranted	Future studies for sub-diseases and understanding the biological mechanisms are warranted	empirical	n
chan2018	quantitative	7150288	44600	other	complete records for hospital admission	n - but it must be?	Hong Kong: Public hospital admissions	both	n	n	n	y	n	ambient temperature	mean temperature	Principle diagnosis of mental disorder on hospital admission	dementias		generalised additive model	null	u-shaped	U-shaped relationship found between temperature and dementias but not significant	Future studies for sub-diseases and understanding the biological mechanisms are warranted	Future studies for sub-diseases and understanding the biological mechanisms are warranted	Future studies for sub-diseases and understanding the biological mechanisms are warranted	Future studies for sub-diseases and understanding the biological mechanisms are warranted	empirical	n
chan2018	quantitative	7150288	44600	other	complete records for hospital admission	n - but it must be?	Hong Kong: Public hospital admissions	both	n	n	n	y	n	ambient temperature	mean temperature	Principle diagnosis of mental disorder on hospital admission	schizophrenic disorders		generalised additive model	negative		No relationship found between increased temperature and schizophrenic disorders	Future studies for sub-diseases and understanding the biological mechanisms are warranted	Future studies for sub-diseases and understanding the biological mechanisms are warranted	Future studies for sub-diseases and understanding the biological mechanisms are warranted	Future studies for sub-diseases and understanding the biological mechanisms are warranted	empirical	n
chan2018	quantitative	7150288	44600	other	complete records for hospital admission	n - but it must be?	Hong Kong: Public hospital admissions	both	n	n	n	y	n	ambient temperature	mean temperature	Principle diagnosis of mental disorder on hospital admission	episodic mood		generalised additive model	positive		Increased temperature found to increase patients presenting with episodic mood	Future studies for sub-diseases and understanding the biological mechanisms are warranted	Future studies for sub-diseases and understanding the biological mechanisms are warranted	Future studies for sub-diseases and understanding the biological mechanisms are warranted	Future studies for sub-diseases and understanding the biological mechanisms are warranted	empirical	n
chan2018	quantitative	7150288	44600	other	complete records for hospital admission	n - but it must be?	Hong Kong: Public hospital admissions	both	n	n	n	y	n	ambient temperature	mean temperature	Principle diagnosis of mental disorder on hospital admission	other non organic psychoses		generalised additive model	positive		Increased temperature found to increase patients presenting with other non organic psychoses	Future studies for sub-diseases and understanding the biological mechanisms are warranted	Future studies for sub-diseases and understanding the biological mechanisms are warranted	Future studies for sub-diseases and understanding the biological mechanisms are warranted	Future studies for sub-diseases and understanding the biological mechanisms are warranted	empirical	n
chan2018	quantitative	7150288	44600	other	complete records for hospital admission	n - but it must be?	Hong Kong: Public hospital admissions	both	n	n	n	y	n	ambient temperature	mean temperature	Principle diagnosis of mental disorder on hospital admission	anxiety		generalised additive model	negative		No relationship found between increased temperature and anxiety	Future studies for sub-diseases and understanding the biological mechanisms are warranted	Future studies for sub-diseases and understanding the biological mechanisms are warranted	Future studies for sub-diseases and understanding the biological mechanisms are warranted	Future studies for sub-diseases and understanding the biological mechanisms are warranted	empirical	n
chan2018	quantitative	7150288	44600	other	complete records for hospital admission	n - but it must be?	Hong Kong: Public hospital admissions	both	n	n	n	y	n	ambient temperature	mean temperature	Principle diagnosis of mental disorder on hospital admission	dissociative and somatoform disorder		generalised additive model	negative		No relationship found between increased temperature and dissociative somatoform disorder	Future studies for sub-diseases and understanding the biological mechanisms are warranted	Future studies for sub-diseases and understanding the biological mechanisms are warranted	Future studies for sub-diseases and understanding the biological mechanisms are warranted	Future studies for sub-diseases and understanding the biological mechanisms are warranted	empirical	n
chan2018	quantitative	7150288	44600	other	complete records for hospital admission	n - but it must be?	Hong Kong: Public hospital admissions	both	n	n	n	y	n	ambient temperature	mean temperature	Principle diagnosis of mental disorder on hospital admission	depressive disorder		generalised additive model	positive		Increased temperature found to increase patients presenting with despressive disorder	Future studies for sub-diseases and understanding the biological mechanisms are warranted	Future studies for sub-diseases and understanding the biological mechanisms are warranted	Future studies for sub-diseases and understanding the biological mechanisms are warranted	Future studies for sub-diseases and understanding the biological mechanisms are warranted	empirical	n
chan2018	quantitative	7150288	44600	other	complete records for hospital admission	n - but it must be?	Hong Kong: Public hospital admissions	both	n	n	n	y	n	ambient temperature	mean temperature	Principle diagnosis of mental disorder on hospital admission	not elsewhere classified mental disorder		generalised additive model	negative		No relationship found between increased temperature and not elsewhere classified mental disorder	Future studies for sub-diseases and understanding the biological mechanisms are warranted	Future studies for sub-diseases and understanding the biological mechanisms are warranted	Future studies for sub-diseases and understanding the biological mechanisms are warranted	Future studies for sub-diseases and understanding the biological mechanisms are warranted	empirical	n
chan2018	quantitative	7150288	44600	other	complete records for hospital admission	n - but it must be?	Hong Kong: Public hospital admissions	both	n	n	n	y	n	ambient temperature	mean temperature	Principle diagnosis of mental disorder on hospital admission	transient mental disorder due to conditions classified else where		generalised additive model	positive		Increased temperature found to increase patients presenting with transient mental disorders due to conditions classified elsewhere	Future studies for sub-diseases and understanding the biological mechanisms are warranted	Future studies for sub-diseases and understanding the biological mechanisms are warranted	Future studies for sub-diseases and understanding the biological mechanisms are warranted	Future studies for sub-diseases and understanding the biological mechanisms are warranted	empirical	n
chan2018	quantitative	7150288	44600	other	complete records for hospital admission	n - but it must be?	Hong Kong: Public hospital admissions	both	n	n	n	y	n	ambient temperature	mean temperature	Principle diagnosis of mental disorder on hospital admission	drug-related mental disroders		generalised additive model	positive		Increased temperature found to increase patients presenting with drug-realted mental disorders	Future studies for sub-diseases and understanding the biological mechanisms are warranted	Future studies for sub-diseases and understanding the biological mechanisms are warranted	Future studies for sub-diseases and understanding the biological mechanisms are warranted	Future studies for sub-diseases and understanding the biological mechanisms are warranted	empirical	n
chan2018	quantitative	7150288	44600	other	complete records for hospital admission	n - but it must be?	Hong Kong: Public hospital admissions	both	n	n	n	y	n	ambient temperature	mean temperature	Principle diagnosis of mental disorder on hospital admission	alcohol-related mental disorders		generalised additive model	negative		No relationship found between increased temperature and alcohol-related mental disorders	Future studies for sub-diseases and understanding the biological mechanisms are warranted	Future studies for sub-diseases and understanding the biological mechanisms are warranted	Future studies for sub-diseases and understanding the biological mechanisms are warranted	Future studies for sub-diseases and understanding the biological mechanisms are warranted	empirical	n
chase2017		Bhuthanese refugees	40	Other	Combination of strategic, convience and random	n	Nepal	mh	n	y	n	n	n															y	No environmental science componant
chen2013	Quantiative	adults	2866	systematic	Drawn from Wave II (2009) f Chinease Attitudes toward Inequality and Distributive ; designed to be nationally representative using spatial probability sampling technology	y	China	mh	n	n	n	y	cross-sectional	self-report	perceived water quality	interview	depressive symptoms during previous week (short form of Center of Epidemiological Studies Depression Scale [CES-D])	Demographics: age, gender, marital status, ethnicity; Socio-econ: education, work status; Migration & Residency status: urban, rural-to-urban migrants, rural; County-level socio-economics: population density, industrial ouptut; Municipal Environmental Hazards: annual average daily PM10, SO2, NO2; category (best/worst scale) of nearest surface water, % industrial solid waste not treated, physical …	ordered logistic regression	null		no significant association between perceived water quality and depressive symptoms amongst urban, rural-to-urban migrants, rural	use time series or event-history measures to examine causality	objective individual level exposure (currently pollution exposure is at aggregate);	non-self report assessment of mental health		empirical	n	n
chen2013	Quantiative	adults	2866	systematic	Drawn from Wave II (2009) f Chinease Attitudes toward Inequality and Distributive ; designed to be nationally representative using spatial probability sampling technology	y	China	mh	n	n	n	y	cross-sectional	self-report	perceived air quality	interview	depressive symptoms during previous week (short form of Center of Epidemiological Studies Depression Scale [CES-D])	Demographics: age, gender, marital status, ethnicity; Socio-econ: education, work status; Migration & Residency status: urban, rural-to-urban migrants, rural; County-level socio-economics: population density, industrial ouptut; Municipal Environmental Hazards: annual average daily PM10, SO2, NO2; category (best/worst scale) of nearest surface water, % industrial solid waste not treated, physical …	ordered logistic regression	null		no significant association between perceived air quality and depressive symptoms amongst urban, rural-to-urban migrants, rural	use time series or event-history measures to examine causality	objective individual level exposure (currently pollution exposure is at aggregate);	non-self report assessment of mental health	examine effect of indoor air quality exposure		n	n
chen2013	Quantiative	adults	2866	systematic	Drawn from Wave II (2009) f Chinease Attitudes toward Inequality and Distributive ; designed to be nationally representative using spatial probability sampling technology	y	China	mh	n	n	n	y	cross-sectional	self-report	perceived degree of danger to toxic waste (industrial waste metrc)	interview	depressive symptoms during previous week (short form of Center of Epidemiological Studies Depression Scale [CES-D])	Demographics: age, gender, marital status, ethnicity; Socio-econ: education, work status; Migration & Residency status: urban, rural-to-urban migrants, rural; County-level socio-economics: population density, industrial ouptut; Municipal Environmental Hazards: annual average daily PM10, SO2, NO2; category (best/worst scale) of nearest surface water, % industrial solid waste not treated, physical …	ordered logistic regression	positive		significant association between higher perceievd danger of toxic waste and depressive symptoms amongst urban; no significant for rural-to-urban migrants and rural	use time series or event-history measures to examine causality	objective individual level exposure (currently pollution exposure is at aggregate);	non-self report assessment of mental health		empirical	n	n
chen2013	Quantiative	adults	2866	systematic	Drawn from Wave II (2009) f Chinease Attitudes toward Inequality and Distributive ; designed to be nationally representative using spatial probability sampling technology	y	China	mh	n	n	n	y	cross-sectional	self-report	perceived overall environmental hazard - compilation of the individual questions	interview	depressive symptoms during previous week (short form of Center of Epidemiological Studies Depression Scale [CES-D])	Demographics: age, gender, marital status, ethnicity; Socio-econ: education, work status; Migration & Residency status: urban, rural-to-urban migrants, rural; County-level socio-economics: population density, industrial ouptut; Municipal Environmental Hazards: annual average daily PM10, SO2, NO2; category (best/worst scale) of nearest surface water, % industrial solid waste not treated, physical …		positive		sig positive association between perceived environmental hazards and more symptoms of deression among for urban but not for migrants or rural	use time series or event-history measures to examine causality	objective individual level exposure (currently pollution exposure is at aggregate);	non-self report assessment of mental health		empirical	n	n
chen2020a	quantitative	aged 60-90, resident for 6+ months, lived in 20 typical Guangzhou neighbourhoods	966	other	mutli-stage stratified probability proportionate to population size sampling technique	n	Guangzhou, China	both	n	y	n	n	n	exposure to bluespace	included visit characteristics, proximity to bluespcae, Normalised difference water index, landscape fragmentation	SF-36 questionnaire	mental health	hydrophilicity index, social contact	multi-linear regression modelling	null		Blue space exposure not significantly associated with mental health	n/a	Role of bluespace indicators and underlying mechanisms	n/a	n/a	empirical	n
chen2020a	quantitative	aged 60-90, resident for 6+ months, lived in 20 typical Guangzhou neighbourhoods	966	other	mutli-stage stratified probability proportionate to population size sampling technique	n	Guangzhou, China	both	n	y	n	n	n	exposure to bluespace	per capita water area	SF-36 questionnaire	mental health	hydrophilicity index, social contact	multi-linear regression modelling	positive		Per capita water area is positively associated with mental health	n/a	Role of bluespace indicators and underlying mechanisms	n/a	n/a	empirical	n
chen2020a	quantitative	aged 60-90, resident for 6+ months, lived in 20 typical Guangzhou neighbourhoods	966	other	mutli-stage stratified probability proportionate to population size sampling technique	n	Guangzhou, China	both	n	y	n	n	n	exposure to bluespace	per capita water area	SF-36 questionnaire	stress	hydrophilicity index, social contact	multi-linear regression modelling	negative		per car water area is negatively associated with stress	n/a	Role of bluespace indicators and underlying mechanisms	n/a	n/a	empirical	n
chen2020a	quantitative	aged 60-90, resident for 6+ months, lived in 20 typical Guangzhou neighbourhoods	966	other	mutli-stage stratified probability proportionate to population size sampling technique	n	Guangzhou, China	both	n	y	n	n	n	exposure to bluespace	environment pollution	SF-36 questionnaire	mental health	hydrophilicity index, social contact	multi-linear regression modelling	negative		Presence of environmental pollution negatively affects mental health	n/a	Role of bluespace indicators and underlying mechanisms	n/a	n/a	empirical	n
cherry2015	Quantiative	Residents of disaster-affected communities	219	convenience (non-students)	Residents with severe property damage (from Hurricanes Katrina and Rita, exposre to Deepwater Horizon Oil Spill) plus control group of non-coastal residents indirectly affected people	n	S. Louisiana, USA	mh	n	y	n	n	Includes 2 control group of non-disaster affected people. Disaster affected people grouped into 2 categories.	None	Whether in disaster affected group (2 groups - current residents, coastal fishers) or control groups (2 groups - non-coastal residents, former residents)	questionnaire	PTSD Checklist-Civilian Version. Cut off threshold applied (>=50 indicated PTSD)		ANOVA F-tests	null		No difference between groups on PTSD or GAD but sig diff for depression symptoms. Coastal fishers had higher prevalance of despression symptoms than other groups.			Future research guided by COR theory would be useful to identify personal characteristics associated with post-disater resilience and long-term recovery. Future research to address generality of findings of present study.	Do older persons with prior trauma exposure cope differently to younger people?	empirical	n
cherry2015	Quantiative	Residents of disaster-affected communities	219	convenience (non-students)	Residents with severe property damage (from Hurricanes Katrina and Rita, exposre to Deepwater Horizon Oil Spill) plus control group of non-coastal residents indirectly affected people	n	S. Louisiana, USA	mh	n	y	n	n	Includes 2 control group of non-disaster affected people. Disaster affected people grouped into 2 categories.	None	Whether in disaster affected group (2 groups - current residents, coastal fishers) or control groups (2 groups - non-coastal residents, former residents)	questionnaire	Self report depression symptoms scale adapted from PRIME-MD (Primary Care Evaluation of Mental Disorders). Score of 2 (0-3 scale) on at least symptom indicated depression.		ANOVA F-tests	other	Sig diff between groups	No difference between groups on PTSD or GAD but sig diff for depression symptoms. Coastal fishers had higher prevalance of despression symptoms than other groups.			Future research guided by COR theory would be useful to identify personal characteristics associated with post-disater resilience and long-term recovery. Future research to address generality of findings of present study.	Do older persons with prior trauma exposure cope differently to younger people?	empirical	n
cherry2015	Quantiative	Residents of disaster-affected communities	219	convenience (non-students)	Residents with severe property damage (from Hurricanes Katrina and Rita, exposre to Deepwater Horizon Oil Spill) plus control group of non-coastal residents indirectly affected people	n	S. Louisiana, USA	mh	n	y	n	n	Includes 2 control group of non-disaster affected people. Disaster affected people grouped into 2 categories.	None	Whether in disaster affected group (2 groups - current residents, coastal fishers) or control groups (2 groups - non-coastal residents, former residents)	questionnaire	GAD-7 generalised anxiety disorder symptoms scale. Threshold (>=10) over which GAD indicated.		ANOVA F-tests	null		No difference between groups on PTSD or GAD but sig diff for depression symptoms. Coastal fishers had higher prevalance of despression symptoms than other groups.			Future research guided by COR theory would be useful to identify personal characteristics associated with post-disater resilience and long-term recovery. Future research to address generality of findings of present study.	Do older persons with prior trauma exposure cope differently to younger people?	empirical	n
cherry2015	Quantiative	Residents of disaster-affected communities	219	convenience (non-students)	Residents with severe property damage (from Hurricanes Katrina and Rita, exposre to Deepwater Horizon Oil Spill) plus control group of non-coastal residents indirectly affected people	n	S. Louisiana, USA	mh	n	y	n	n	Includes 2 control group of non-disaster affected people. Disaster affected people grouped into 2 categories.	None	Whether in disaster affected group (2 groups - current residents, coastal fishers) or control groups (2 groups - non-coastal residents, former residents)	questionnaire	PTSD Checklist-Civilian Version. Cut off threshold applied (>=50 indicated PTSD)	gender, church membership, religiousity, perceived social support	Logistic regression	null		No difference between groups on PTSD or GAD but sig diff for depression symptoms. Coastal fishers had higher prevalance of despression symptoms than control groups.			Future research guided by COR theory would be useful to identify personal characteristics associated with post-disater resilience and long-term recovery. Future research to address generality of findings of present study.	Do older persons with prior trauma exposure cope differently to younger people?	empirical	n
cherry2015	Quantiative	Residents of disaster-affected communities	219	convenience (non-students)	Residents with severe property damage (from Hurricanes Katrina and Rita, exposre to Deepwater Horizon Oil Spill) plus control group of non-coastal residents indirectly affected people	n	S. Louisiana, USA	mh	n	y	n	n	Includes 2 control group of non-disaster affected people. Disaster affected people grouped into 2 categories.	None	Whether in disaster affected group (2 groups - current residents, coastal fishers) or control groups (2 groups - non-coastal residents, former residents)	questionnaire	Self report depression symptoms scale adapted from PRIME-MD (Primary Care Evaluation of Mental Disorders). Score of 2 (0-3 scale) on at least symptom indicated depression.	gender, church membership, religiousity, perceived social support	Logistic regression	positive		No difference between groups on PTSD or GAD but sig diff for depression symptoms. Coastal fishers had higher prevalance of despression symptoms than control groups.			Future research guided by COR theory would be useful to identify personal characteristics associated with post-disater resilience and long-term recovery. Future research to address generality of findings of present study.	Do older persons with prior trauma exposure cope differently to younger people?	empirical	n
cherry2015	Quantiative	Residents of disaster-affected communities	219	convenience (non-students)	Residents with severe property damage (from Hurricanes Katrina and Rita, exposre to Deepwater Horizon Oil Spill) plus control group of non-coastal residents indirectly affected people	n	S. Louisiana, USA	mh	n	y	n	n	Includes 2 control group of non-disaster affected people. Disaster affected people grouped into 2 categories.	None	Whether in disaster affected group (2 groups - current residents, coastal fishers) or control groups (2 groups - non-coastal residents, former residents)	questionnaire	GAD-7 generalised anxiety disorder symptoms scale. Threshold (>=10) over which GAD indicated.	gender, church membership, religiousity, perceived social support	Logistic regression	null		No difference between groups on PTSD or GAD but sig diff for depression symptoms. Coastal fishers had higher prevalance of despression symptoms than control groups.			Future research guided by COR theory would be useful to identify personal characteristics associated with post-disater resilience and long-term recovery. Future research to address generality of findings of present study.	Do older persons with prior trauma exposure cope differently to younger people?	empirical	n
cherry2017	Quantiative	Baton Rouge metropoliton area and coastal counties	219	Other	Self selected following advertisment	n	Baton Rouge, USA	mh	n	y	n	n		Experience of hurricane and oil spill		self report scales	mental health - Medical Outcomes Short form health survey	optimism (scale), hope (scale), gender, education, income, chronic conditions, health, lifetime trauma	bivariate logisitic regression									y	Study does not report mental health outcomes
cherry2017a	Quantiative	People working in Fort McMurray	112	convenience (non-students)	Data collected from participants who had been recruited into 2 occupational health cohort studies in advance of wildfire event	n	Fort McMurray, Alberta, Canada	both	n	y	n	y	Existing cohort study data used as baseline, then post-fire surveys conducted after wildfire event to assess its impact	Wildfire and evacuation occurred; surveyed 20-181 days after fire	Evacuated due to fire (vs no evacuated or not there at the time)	questionnaire	[Post-fire] anxiety score - from HADS (Hospital Anxiety and Depression Scale)		ANOVA	positive		Those who were evacuated due to the wildfire had significantly higher anxiety and depression scores					empirical	n
cherry2017a	Quantiative	People working in Fort McMurray	112	convenience (non-students)	Data collected from participants who had been recruited into 2 occupational health cohort studies in advance of wildfire event	n	Fort McMurray, Alberta, Canada	both	n	y	n	y	Existing cohort study data used as baseline, then post-fire surveys conducted after wildfire event to assess its impact	Wildfire and evacuation occurred; surveyed 20-181 days after fire	Evacuated due to fire (vs no evacuated or not there at the time)	questionnaire	[Post-fire] depression score - HADS (Hospital Anxiety and Depression Scale)		ANOVA	positive		Those who were evacuated due to the wildfire had significantly higher anxiety and depression scores					empirical	n
cherry2017a	Quantiative	People working in Fort McMurray	112	convenience (non-students)	Data collected from participants who had been recruited into 2 occupational health cohort studies in advance of wildfire event	n	Fort McMurray, Alberta, Canada	both	n	y	n	y	Existing cohort study data used as baseline, then post-fire surveys conducted after wildfire event to assess its impact	Wildfire and evacuation occurred; surveyed 20-181 days after fire	Evacuated to a reception centre (vs not)	questionnaire	[Post-fire] anxiety score - from HADS (Hospital Anxiety and Depression Scale)	sex, evauated to motel, neighbourhood damage, financial loss from work, health problem after fire, >90days since fire	Multivariate regression	null		Being evacuated to a reception centre was not significantly related to anxiety score					empirical	n
cherry2017a	Quantiative	People working in Fort McMurray	112	convenience (non-students)	Data collected from participants who had been recruited into 2 occupational health cohort studies in advance of wildfire event	n	Fort McMurray, Alberta, Canada	both	n	y	n	y	Existing cohort study data used as baseline, then post-fire surveys conducted after wildfire event to assess its impact	Wildfire and evacuation occurred; surveyed 20-181 days after fire	Evacuated to a motel (vs not)	questionnaire	[Post-fire] anxiety score - from HADS (Hospital Anxiety and Depression Scale)	sex, evauated to reception centre, neighbourhood damage, financial loss from work, health problem after fire, >90days since fire	Multivariate regression	positive		Being evacuated to a motel was associated with higher anxiety scores					empirical	n
cherry2017a	Quantiative	People working in Fort McMurray	112	convenience (non-students)	Data collected from participants who had been recruited into 2 occupational health cohort studies in advance of wildfire event	n	Fort McMurray, Alberta, Canada	both	n	y	n	y	Existing cohort study data used as baseline, then post-fire surveys conducted after wildfire event to assess its impact	Wildfire and evacuation occurred; surveyed 20-181 days after fire	Neighbourhood damaged by the fire (vs not)	questionnaire	[Post-fire] anxiety score - from HADS (Hospital Anxiety and Depression Scale)	sex, evauated to reception centre, evacuated to motel, financial loss from work, health problem after fire, >90days since fire	Multivariate regression	null		Neighbourhood damaged by fire was not significantly related to anxiety score					empirical	n
cherry2017a	Quantiative	People working in Fort McMurray	112	convenience (non-students)	Data collected from participants who had been recruited into 2 occupational health cohort studies in advance of wildfire event	n	Fort McMurray, Alberta, Canada	both	n	y	n	y	Existing cohort study data used as baseline, then post-fire surveys conducted after wildfire event to assess its impact	Wildfire and evacuation occurred; surveyed 20-181 days after fire	Evacuated to a reception centre (vs not)	questionnaire	[Post-fire] depression score - HADS (Hospital Anxiety and Depression Scale)	sex, evauated to motel, neighbourhood damage, financial loss from work, health problem after fire, >90days since fire	Multivariate regression	null		Being evacuated to a reception centre was not significantly related to depression score					empirical	n
cherry2017a	Quantiative	People working in Fort McMurray	112	convenience (non-students)	Data collected from participants who had been recruited into 2 occupational health cohort studies in advance of wildfire event	n	Fort McMurray, Alberta, Canada	both	n	y	n	y	Existing cohort study data used as baseline, then post-fire surveys conducted after wildfire event to assess its impact	Wildfire and evacuation occurred; surveyed 20-181 days after fire	Evacuated to a motel (vs not)	questionnaire	[Post-fire] depression score - HADS (Hospital Anxiety and Depression Scale)	sex, evauated to reception centre, neighbourhood damage, financial loss from work, health problem after fire, >90days since fire	Multivariate regression	null		Being evacuated to a motel was not significantly related to depression score					empirical	n
cherry2017a	Quantiative	People working in Fort McMurray	112	convenience (non-students)	Data collected from participants who had been recruited into 2 occupational health cohort studies in advance of wildfire event	n	Fort McMurray, Alberta, Canada	both	n	y	n	y	Existing cohort study data used as baseline, then post-fire surveys conducted after wildfire event to assess its impact	Wildfire and evacuation occurred; surveyed 20-181 days after fire	Neighbourhood damaged by the fire (vs not)	questionnaire	[Post-fire] depression score - HADS (Hospital Anxiety and Depression Scale)	sex, evauated to reception centre, evacuated to motel, financial loss from work, health problem after fire, >90days since fire	Multivariate regression	null		Neighbourhood damaged by fire was not significantly related to depression score					empirical	n
choi2016	Quantiative	Taean district residents	993	random		n	Taean, Korea	mh	n	y	n	n	n	Distance to oil spill	Oil spill exposure level	survey	PTSD self report scale	Occupation, education, participation in clean up, age, sex, income, marital status	Logistic regression	positive		Positive association in being closer to spill and prevelence of condition. Higher also in fishers or realted occupations					empirical	n
choi2016	Quantiative	Taean district residents	993	random		n	Taean, Korea	mh	n	y	n	n	n	Distance to oil spill	Oil spill exposure level	survey	Depressive symptoms		Logistic regression	positive		Positive association in being closer to spill and prevelence of condition. Higher also in fishers or realted occupations					empirical	n
choi2016	Quantiative	Taean district residents	993	random		n	Taean, Korea	mh	n	y	n	n	n	Distance to oil spill	Oil spill exposure level	survey	Suicidal ideation		Logistic regression	positive		Positive association in being closer to spill and prevelence of condition. Higher also in fishers or realted occupations					empirical	n
choi2016	Quantiative	Taean district residents	993	random		n	Taean, Korea	mh	n	y	n	n	n	Distance to oil spill	Oil spill exposure level	survey	Anxiety		Logistic regression	positive		Positive association in being closer to spill and prevelence of condition. Higher also in fishers or realted occupations					empirical	n
choi2018	Quantiative	students	114	convenience (students)		n	South Korea	mh	n	y	n	n		self report forest exposure	frequency of visit in last year	self report	happiness	motives for use; perceived benefits	student t-test	positive		those with more regular contact with forests reported higher levels of happiness	not discussed	not discussed	not discussed	other population subgroups	composite	n
choi2018	Quantiative	students	114	convenience (students)		n	South Korea	mh	n	y	n	n		self report forest exposure	why need forest contact	self report	mental health		descriptive	other		36% reported mental health as reason for forest contact	not discussed	not discussed	not discussed	other population subgroups	composite	n
Clemens2013	Quantiative	household adult over 16 in the Natural Disaster modules of Government's annual Self-reported health status survey	6104	random		y	Australia- Queensland	mh	n	y	n	n	cross sectional	weather related disasters in 2010-2011	exposure to flood, cyclone	survey - telephone based	thought might be badly injured or die	Remoteness, Index of socio-economic advantage/disadvangate, age, gender, employment	% with CI	other	3.9% (1 in 25 respondents) thought this during the disaster	retirees less likely to report thinking they might be badly injured; those in remote and outer regional areas more likely to report concern about being badly injured than those living in major cities.	not discussed	not discussed	not discussed	not discussed	empirical	n
Clemens2013	Quantiative	household adult over 16 in the Natural Disaster modules of Government's annual Self-reported health status survey	6104	random		y	Australia- Queensland	mh	n	y	n	n	cross sectional	weather related disasters in 2010-2012	exposure to flood, cyclone	survey - telephone based	felt terrified, helpless or hopeless after the disaster	Remoteness, Index of socio-economic advantage/disadvangate, age, gender, employment	% with CI	other	14.3% (1 in 7 respondents) reported feeling this way	those of working age, those in remote and outer regional areas (compared to than those living in major cities), woman, individuals living in most disadvantaged areas reported feeling terrified.	not discussed	not discussed	not discussed	not discussed	empirical	n
Clemens2013	Quantiative	household adult over 16 in the Natural Disaster modules of Government's annual Self-reported health status survey	6104	random		y	Australia- Queensland	mh	n	y	n	n	cross sectional	weather related disasters in 2010-2013	exposure to flood, cyclone	survey - telephone based	still currently distressed between 2-5 months after	Remoteness, Index of socio-economic advantage/disadvangate, age, gender, employment	% with CI	other	7.1% felt this way	Current stress more likely among women and those living in remote areas.	not discussed	not discussed	not discussed	not discussed	empirical	n
Clemens2013	Quantiative	household adult over 16 in the Natural Disaster modules of Government's annual Self-reported health status survey	6104	random		y	Australia- Queensland	mh	n	y	n	n	cross sectional	weather related disasters in 2010-2015	exposure to flood, cyclone	survey - telephone based	worried about how will manage	Remoteness, Index of socio-economic advantage/disadvangate, age, gender, employment	% with CI	other	8.6% felt this way	Higher prevalence of middle-aged adults, unemployed and those living in outer regional and remote areas more likely to report worried about how they would manage	not discussed	not discussed	not discussed	not discussed	empirical	n
cooper2019	Qualitative	farmers living in one of three villages selected to be along transect of avarying levels of access to water supply	48	Other	purposive	n	Ethiopia - Afar region	mh	n	y	n	n		water scarcity	selection of villages with varying levels of access to wter supply: improved water supply (i.e. motorised borehole) to unimproved (unprotected from faecal contamination)	interviews & focus groups	water security - how make them feel	age, gender, single with children	thematic	positive		greater water scarcity linked with increased feelings of anxiety and depression	not discussed	not discussed	not discussed	not discussed	empirical	n
cope2013	quantitative	6000	Residents of Plaquemines, Laforche, Terre-bonne parishes	random	not reported	n	Louisianna, United States	m/h	n	y	n	n	n	Exposure to Deepwater Horizon Oilspill	time after disaster (wave 1: during, wave 2 - 4 months following and wave 3 a year after)	Negative mental health symptoms	mental health (an index of how often respondents have experienced: worry; sadenss, nervousness, fear, depresson, anxiety, anger, in last week)	community attachment, proximity to coast, length of residence, employment status, educational achievement, ethinicity, race, religious affiliation, sex, age)	ordinal least sqaures regression models	positive		Negative mental health benefits were more signicantly present immediately following the disaster and improved with time.	a panel design that follows the same group of respondents over time would allow researchers to better track the dynamics of vulnerability and resilience over time.	n/a	future research should undertsand the unique contribution of social capital and community attachement to enhancing disaster resilience and peoples' psychological sense of community	n/a	empirical	n
cope2013	quantitative	6000	Residents of Plaquemines, Laforche, Terre-bonne parishes	random	not reported	n	Louisianna, United States	m/h	n	y	n	n	n	Employment in natural resource occupations	employment in fishing industry	Negative mental health symptoms	mental health (an index of how often respondents have experienced: worry; sadenss, nervousness, fear, depresson, anxiety, anger, in last week)	community attachment, proximity to coast, length of residence, employment status, educational achievement, ethinicity, race, religious affiliation, sex, age)	ordinal least sqaures regression models	negative		Households with a member emplyed in fishing industry demostrated lower mental health following the disaster	a panel design that follows the same group of respondents over time would allow researchers to better track the dynamics of vulnerability and resilience over time.	n/a	future research should undertsand the unique contribution of social capital and community attachement to enhancing disaster resilience and peoples' psychological sense of community	n/a	empirical	n
cope2013	quantitative	6000	Residents of Plaquemines, Laforche, Terre-bonne parishes	random	not reported	n	Louisianna, United States	m/h	n	y	n	n	n	Employment in natural resource occupations	employment in fishing industry	Negative mental health symptoms	mental health (an index of how often respondents have experienced: worry; sadenss, nervousness, fear, depresson, anxiety, anger, in last week)	community attachment, proximity to coast, length of residence, employment status, educational achievement, ethinicity, race, religious affiliation, sex, age)	ordinal least sqaures regression models	negative		Households with a member employed in fishing industry demostrated lower mental health following the disaster; and these symptoms got worse with time	a panel design that follows the same group of respondents over time would allow researchers to better track the dynamics of vulnerability and resilience over time.	n/a	future research should undertsand the unique contribution of social capital and community attachement to enhancing disaster resilience and peoples' psychological sense of community	n/a	empirical	n
costello2019	qualitative	17	17 (10 men, 7 women)	other	ethnographic participation in three swimming groups	n	Perth, Australia (Cottesloe, Sorrento, Mullaloo beaches)	m/h	n	y	n	n	n	Swimming in the sea	swimming in the sea	focused ethnography and in-person interviews	feeling calm	swimming in a group	focused ethnography employing theoretical framework	positive		Swimming in the sea made participant feel calm	n/a	n/a	n/a	n/a	empirical	n
costello2019	qualitative	17	17 (10 men, 7 women)	other	ethnographic participation in three swimming groups	n	Perth, Australia (Cottesloe, Sorrento, Mullaloo beaches)	m/h	n	y	n	n	n	swimming in the sea	swimming in the sea	focused ethnography and in-person interviews	helped grieving	swimming in a group	focused ethnography employing theoretical framework	positive		Swimming in the sea made participant switch off	n/a	n/a	n/a	n/a	empirical	n
costello2019	qualitative	17	17 (10 men, 7 women)	other	ethnographic participation in three swimming groups	n	Perth, Australia (Cottesloe, Sorrento, Mullaloo beaches)	m/h	n	y	n	n	n	swimming in the sea	swimming in the sea	focused ethnography and in-person interviews	swtiching off	swimming in a group	focused ethnography employing theoretical framework	positive		Swimming in the sea helped participant "swtich off"	n/a	n/a	n/a	n/a	empirical	n
costello2019	qualitative	17	17 (10 men, 7 women)	other	ethnographic participation in three swimming groups	n	Perth, Australia (Cottesloe, Sorrento, Mullaloo beaches)	m/h	n	y	n	n	n	swimming in the sea	swimming in the sea	focused ethnography and in-person interviews	sleeping better	swimming in a group	focused ethnography employing theoretical framework	positive		Swimming in the sea made participant sleep better	n/a	n/a	n/a	n/a	empirical	n
costello2019	qualitative	17	17 (10 men, 7 women)	other	ethnographic participation in three swimming groups	n	Perth, Australia (Cottesloe, Sorrento, Mullaloo beaches)	m/h	n	y	n	n	n	swimming in the sea	swimming in the sea	focused ethnography and in-person interviews	self confidence	swimming in a group	focused ethnography employing theoretical framework	positive		Swimming in the sea increased participant's self-confidence	n/a	n/a	n/a	n/a	empirical	n
costello2019	qualitative	17	17 (10 men, 7 women)	other	ethnographic participation in three swimming groups	n	Perth, Australia (Cottesloe, Sorrento, Mullaloo beaches)	m/h	n	y	n	n	n	wildswimming environment	Seeing wildlife	focused ethnography and in-person interviews	pleasure	swimming in a group	focused ethnography employing theoretical framework	positive		Seeing wildlife when swimming in the sea gave participant pleasure	n/a	n/a	n/a	n/a	empirical	n
costello2019	qualitative	17	17 (10 men, 7 women)	other	ethnographic participation in three swimming groups	n	Perth, Australia (Cottesloe, Sorrento, Mullaloo beaches)	m/h	n	y	n	n	n	wildswimming environment	presence of sharks	focused ethnography and in-person interviews	nervous	swimming in a group	focused ethnography employing theoretical framework	positive		Presence of sharks made participants feel worried	n/a	n/a	n/a	n/a	empirical	n
cowdhury2016	quantitative	4099 individuals	4500 households	other	quasi-randomly	n	Chandpur, Gopalgorj, Netrokona and Sunamgonj in Bangladesh	both	n	y	n	n	n	dataset on arsenic contamination	arsenicosis symptoms based on measures of arsenic contamination, darkening of skins or pals, dark spots on body, keratosis, cardivascular disorder, respiratory disorder)	GHQ12	mental health	sex, age, literacy, working or not, wage, relatives living nearby, BMI, recent illness	linear regressions, unconditional regressions	negative		A presence of arsenicosis symptoms leads to worsening mental health	n/a	future research should more thoroughly investigate whether arsenocosis symptoms might cause mental illhealth through worrying	future research should more thoroughly investigate whether arsenocosis symptoms might cause mental illhealth through worrying	future research should more thoroughly investigate whether arsenocosis symptoms might cause mental illhealth through worrying	empirical	n
cowdhury2016	quantitative	4099 individuals	4500 households	other	quasi-randomly	n	Chandpur, Gopalgorj, Netrokona and Sunamgonj in Bangladesh	both	n	y	n	n	n	dataset on arsenic contamination	drinking from untested water resouces	GHQ12	mental health	sex, age, literacy, working or not, wage, relatives living nearby, BMI, recent illness	linear regressions, unconditional regressions	negative		Drinking from untested water resources decreases mental health	n/a	future research should more thoroughly investigate whether arsenocosis symptoms might cause mental illhealth through worrying	future research should more thoroughly investigate whether arsenocosis symptoms might cause mental illhealth through worrying	future research should more thoroughly investigate whether arsenocosis symptoms might cause mental illhealth through worrying	empirical	n
cowdhury2016	quantitative	4099 individuals	4500 households	other	quasi-randomly	n	Chandpur, Gopalgorj, Netrokona and Sunamgonj in Bangladesh	both	n	y	n	n	n	dataset on arsenic contamination	distance to access drinking water	GHQ12	mental health	sex, age, literacy, working or not, wage, relatives living nearby, BMI, recent illness	linear regressions, unconditional regressions	negative		distance to access water decreases mental health	n/a	future research should more thoroughly investigate whether arsenocosis symptoms might cause mental illhealth through worrying	future research should more thoroughly investigate whether arsenocosis symptoms might cause mental illhealth through worrying	future research should more thoroughly investigate whether arsenocosis symptoms might cause mental illhealth through worrying	empirical	n
cowdhury2016	quantitative	4099 individuals	4500 households	other	quasi-randomly	n	Chandpur, Gopalgorj, Netrokona and Sunamgonj in Bangladesh	both	n	y	n	n	n	dataset on arsenic contamination	arsenocosis symptoms of someone else in household	GHQ12	mental health	sex, age, literacy, working or not, wage, relatives living nearby, BMI, recent illness	linear regressions, unconditional regressions	negative		household member has arsenocosis symptoms decreases mental health	n/a	future research should more thoroughly investigate whether arsenocosis symptoms might cause mental illhealth through worrying	future research should more thoroughly investigate whether arsenocosis symptoms might cause mental illhealth through worrying	future research should more thoroughly investigate whether arsenocosis symptoms might cause mental illhealth through worrying	empirical	n
crombie2011	Quantiative	children age 9-10	1900	Other	drawn from Children's Cognition and Health (RANCH) Study	n	UK, Netherlands, Spain	both	n	n	y	y		aircraft noise exposure at school	objective measurement - decibels	parent-rated	overall mental health (Strengths and Difficulties Questionnaire (SDQ)	Country; gender, age, employment statuts,, crowding at home, home ownership, mother's education, long-standing illness of child, main language spoken at home, parental support for school work, classroom glazing type; early biological risk	logistic regression	null		no significant increase in emotional symptoms for increase in aircraft noise	not discussed	develop individual level noise exposure measures	not discussed	longitudinal research to examine relationship	empirical	n
crombie2011	Quantiative	children age 9-10	1900	Other	drawn from Children's Cognition and Health (RANCH) Study	n	UK, Netherlands, Spain	both	n	n	y	y		aircraft noise exposure at school	objective measurement - decibels	parent-rated	conduct problems (subscale of SDQ)	Country; gender, age, employment statuts,, crowding at home, home ownership, mother's education, long-standing illness of child, main language spoken at home, parental support for school work, classroom glazing type; early biological risk	logistic regression	null		no significant increase in conduct problems for increase in aircraft noise	not discussed	develop individual level noise exposure measures	not discussed	longitudinal research to examine relationship	empirical	n
crombie2011	Quantiative	children age 9-10	1900	Other	drawn from Children's Cognition and Health (RANCH) Study	n	UK, Netherlands, Spain	both	n	n	y	y		aircraft noise exposure at school	objective measurement - decibels	parent-rated	hyperactivity/inattentionpeer relationship problems (subscale of SDQ)	Country; gender, age, employment statuts,, crowding at home, home ownership, mother's education, long-standing illness of child, main language spoken at home, parental support for school work, classroom glazing type; early biological risk	logistic regression	positive		increased hyperactivity as aircraft noise increased	not discussed	develop individual level noise exposure measures	not discussed	longitudinal research to examine relationship	empirical	n
crombie2011	Quantiative	children age 9-10	1900	Other	drawn from Children's Cognition and Health (RANCH) Study	n	UK, Netherlands, Spain	both	n	n	y	y		aircraft noise exposure at school	objective measurement - decibels	parent-rated	emotional symptoms (subscale of SDQ)	Country; gender, age, employment statuts,, crowding at home, home ownership, mother's education, long-standing illness of child, main language spoken at home, parental support for school work, classroom glazing type; early biological risk	logistic regression	null		no significant increase in overall mental health issues as aircraft noise increases	not discussed	develop individual level noise exposure measures	not discussed	longitudinal research to examine relationship	empirical	n
crombie2011	Quantiative	children age 9-10	1900	Other	drawn from Children's Cognition and Health (RANCH) Study	n	UK, Netherlands, Spain	both	n	n	y	y		road traffic noise at school	combination of objective measurement (decibels) and modelled data	parent-rated	overall mental health (Strengths and Difficulties Questionnaire (SDQ)	Country; gender, age, employment statuts,, crowding at home, home ownership, mother's education, long-standing illness of child, main language spoken at home, parental support for school work, classroom glazing type; early biological risk	logistic regression	null		no significant association in overall mental health status as traffic noise incrased	not discussed	develop individual level noise exposure measures	not discussed	longitudinal research to examine relationship	empirical	n
crombie2011	Quantiative	children age 9-10	1900	Other	drawn from Children's Cognition and Health (RANCH) Study	n	UK, Netherlands, Spain	both	n	n	y	y		road traffic noise at school	combination of objective measurement (decibels) and modelled data	parent-rated	conduct problems (subscale of SDQ)	Country; gender, age, employment statuts,, crowding at home, home ownership, mother's education, long-standing illness of child, main language spoken at home, parental support for school work, classroom glazing type; early biological risk	logistic regression	negative		decreased conduct disorder for increase in road traffic noise	not discussed	develop individual level noise exposure measures	not discussed	longitudinal research to examine relationship	empirical	n
crombie2011	Quantiative	children age 9-10	1900	Other	drawn from Children's Cognition and Health (RANCH) Study	n	UK, Netherlands, Spain	both	n	n	y	y		road traffic noise at school	combination of objective measurement (decibels) and modelled data	parent-rated	hyperactivity/inattention peer relationship problems (subscale of SDQ)	Country; gender, age, employment statuts,, crowding at home, home ownership, mother's education, long-standing illness of child, main language spoken at home, parental support for school work, classroom glazing type; early biological risk	logistic regression	null		no significant association in hyperactivity as road traffic noise increased	not discussed	develop individual level noise exposure measures	not discussed	longitudinal research to examine relationship	empirical	n
crombie2011	Quantiative	children age 9-10	1900	Other	drawn from Children's Cognition and Health (RANCH) Study	n	UK, Netherlands, Spain	both	n	n	y	y		road traffic noise at school	combination of objective measurement (decibels) and modelled data	parent-rated	emotional symptoms (subscale of SDQ)	Country; gender, age, employment statuts,, crowding at home, home ownership, mother's education, long-standing illness of child, main language spoken at home, parental support for school work, classroom glazing type; early biological risk	logistic regression	null		no significant association in emotional symptoms as road traffic noise increased	not discussed	develop individual level noise exposure measures	not discussed	longitudinal research to examine relationship	empirical	n
dean2010	mixed	111	111	other	re-recruited participants of previous study - perhaps this is convenience?	n	NSW, Australia	m/h	n	y	n	n	n	prolonged drought	drought and community survey for childrem	Negative mental health symptoms	strengths and difficulties questionnaire	age, time	regression	positive		worse mental health in sample than the general population 3 years after a prolonged drought in the area	n/a	n/a	Need to be increased understanding of increased levels of emotional difficulties for youth living in farms than towns	n/a	empirical	n
dean2010	mixed	111	111	other	re-recruited participants of previous study - perhaps this is convenience?	n	NSW, Australia	m/h	n	y	n	n	n	prolonged drought	drought and community survey for childrem	Negative mental health symptoms	strengths and difficulties questionnaire	age, time	regression	positive		emotional subscale in the sample worse than the general population three years after a prolonged drought in the area	n/a	n/a	Need to be increased understanding of increased levels of emotional difficulties for youth living in farms than towns	n/a	empirical	n
dean2010	mixed	111	111	other	re-recruited participants of previous study - perhaps this is convenience?	n	NSW, Australia	m/h	n	y	n	n	n	prolonged drought	drought and community survey for childrem	Negative mental health symptoms	strengths and difficulties questionnaire	age, time	regression	positive		risk of emotional difficulties increased with time following a prolonged drought	n/a	n/a	Need to be increased understanding of increased levels of emotional difficulties for youth living in farms than towns	n/a	empirical	n
dean2010	mixed	111	111	other	re-recruited participants of previous study - perhaps this is convenience?	n	NSW, Australia	m/h	n	y	n	n	n	prolonged drought	drought and community survey for childrem	Negative mental health symptoms	strengths and difficulties questionnaire	age, time	regression	positive		drought and community survey for children and the strengths and difficulties questiionnaire were positively correlated	n/a	n/a	Need to be increased understanding of increased levels of emotional difficulties for youth living in farms than towns	n/a	empirical	n
dean2010	mixed	111	111	other	re-recruited participants of previous study - perhaps this is convenience?	n	NSW, Australia	m/h	n	y	n	n	n	prolonged drought	interview and focus group questions about drought	Negative mental health symptoms			thematic	positive		the presence of a prolonged drought increases stress when making difficult decisions	n/a	n/a	Need to be increased understanding of increased levels of emotional difficulties for youth living in farms than towns	n/a	empirical	n
dean2010	mixed	111	111	other	re-recruited participants of previous study - perhaps this is convenience?	n	NSW, Australia	m/h	n	y	n	n	n	prolonged drought	interview and focus group questions about drought	Negative mental health symptoms			thematic	positive		The presence of a prolonged drought increases depression	n/a	n/a	Need to be increased understanding of increased levels of emotional difficulties for youth living in farms than towns	n/a	empirical	n
dean2010	mixed	111	111	other	re-recruited participants of previous study - perhaps this is convenience?	n	NSW, Australia	m/h	n	y	n	n	n	prolonged drought	interview and focus group questions about drought	Negative mental health symptoms			thematic	positive		The presence of a prolonged drought increases grief and loss	n/a	n/a	Need to be increased understanding of increased levels of emotional difficulties for youth living in farms than towns	n/a	empirical	n
dellaringa2018	Quantiative	Outpatients accessing mental health services	n/a	Other	No sampling - paper looks at monthly numbers of outpatient visits due to mental disorders	y	Serrana region, Brazil	both	n	n	n	y	Time-series analysis of administrative data at the region level	Major landslide event ocurred	Landslide event occurred	Secondary analysis of administrative data	Monthly average number of outpatient visits due to mental disorders		T-tests	positive		Comparing before and after the landslide, this measure of mental health service demand was significantly higher after the event. This was also the case in nonaffected (control) regions though.		Replicate method for other landslides and extreme weather events	Evaluate difference in mental health access between the population with access to private health services and those relying on state services		empirical	n
dellaringa2018	Quantiative	Outpatients accessing mental health services	n/a	Other	No sampling - paper looks at monthly numbers of outpatient visits due to mental disorders	y	Serrana region, Brazil	both	n	n	n	y	Time-series analysis of administrative data at the region level	Major landslide event ocurred	Landslide event occurred	Secondary analysis of administrative data	Montly average proportion of outpatient visits due to mental disorders		T-tests	positive		Comparing before and after the landslide, this measure of mental health service demand was significantly higher after the event. In nonaffected (control) regions there was a reduction in demand observed.		Replicate method for other landslides and extreme weather events	Evaluate difference in mental health access between the population with access to private health services and those relying on state services		empirical	n
dellaringa2018	Quantiative	Outpatients accessing mental health services	n/a	Other	No sampling - paper looks at monthly numbers of outpatient visits due to mental disorders	y	Serrana region, Brazil	both	n	n	n	y	Time-series analysis of administrative data at the region level	Major landslide event ocurred	Landslide event occurred	Secondary analysis of administrative data	Monthly average number of outpatient visits due to mental disorders per each health care unit specialized in mental care perh moth, rate		T-tests	positive		Comparing before and after the landslide, this measure of mental health service demand was significantly higher after the event. In non-affected (control) regions there was a reduction in demand.		Replicate method for other landslides and extreme weather events	Evaluate difference in mental health access between the population with access to private health services and those relying on state services		empirical	n
dellaringa2018	Quantiative	Outpatients accessing mental health services	n/a	Other	No sampling - paper looks at monthly numbers of outpatient visits due to mental disorders	y	Serrana region, Brazil	both	n	n	n	y	Time-series analysis of administrative data at the region level	Major landslide event ocurred	Landslide event occurred	Secondary analysis of administrative data	Number of health care units spacilaized in mental care		T-tests	positive		Comparing before and after the landslide, this measure of mental health service demand was significantly higher after the event. In nonaffected (control) regions there was also an increase in units.		Replicate method for other landslides and extreme weather events	Evaluate difference in mental health access between the population with access to private health services and those relying on state services		empirical	n
dempsey2018	Quantiative	adults over fifty	8504	Other	Drawn from Wave 1 Irish Longitudinal Study on Aging, nationally representative		Ireland	both	n	n	n	y	cross sectional	exposure to blue space	sea view - estimates of blue space visibility	self report	depression (Center for Epidemiologic Studies Depression Scale [CES-D]) - high value = more symptoms of depression	Covariates: vision, anti-depressant medication, age, gender, marital status, employment status, income, smoking status, alcohol problem, social connectedness, pupulation density of electoral division	negative binomial model	negative		those with highest share of sea vivew have lower depression; this association is independent of proximty to the coast (i.e. it remains significant when add proximity to cost into the model)	not discussed	not discussed	not discussed	replicate with other age groups to understand association across life course; research the mechanisms underpinning the association	empirical	n
dempsey2018	Quantiative	adults over fifty	8504	Other	Drawn from Wave 1 Irish Longitudinal Study on Aging, nationally representative		Ireland	both	n	n	n	y	cross sectional	proximity to blue space	distance to coast	self report	depression (Center for Epidemiologic Studies Depression Scale [CES-D]) - high value = more symptoms of depression	Covariates: vision, anti-depressant medication, age, gender, marital status, employment status, income, smoking status, alcohol problem, social connectedness, pupulation density of electoral division	negative binomial model	null		living close to coastline is associated with less depression; this is no longer significant when include sea view in the model	not discussed	apply viewshed methodology to other areas	not discussed	replicate with other age groups to understand association across life course; research the mechanisms underpinning the association	empirical	n
diaz2020	quantitative	3874	3.5 million	other	hospital admission data	n	Madrid, Spain	both	n	n	n	y	n	temperature	max and mean daily temperatures	Negative mental health symptoms	anxiety presented as hospital admission		ecological longitudinal study of time series using log linear models	negative		As temperature decreases hospital admissions for anxiety increases	n/a	n/a	Carrying out similar studies about traffic noise related to anxiety, depression and suicide are needed to corroborate findings	n/a	empirical	n
diaz2020	quantitative	3874	3.5 million	other	hospital admission data	n	Madrid, Spain	both	n	n	n	y	n	pollution	nitrogen dioxide levels	Negative mental health symptoms	suicide		ecological longitudinal study of time series using log linear models	null		There was found to be no association between suicide levels and NO2 levels.	n/a	n/a	Carrying out similar studies about traffic noise related to anxiety, depression and suicide are needed to corroborate findings	n/a	empirical	n
diaz2020	quantitative	3874	3.5 million	other	hospital admission data	n	Madrid, Spain	both	n	n	n	y	n	noise pollution	Leq day	Negative mental health symptoms	anxiety presented as hospital admission	time	ecological longitudinal study of time series using log linear models	positive		There was found to be an immediate effect between rates of anxiety when noise levels were high	n/a	n/a	Carrying out similar studies about traffic noise related to anxiety, depression and suicide are needed to corroborate findings	n/a	empirical	n
diaz2020	quantitative	3874	3.5 million	other	hospital admission data	n	Madrid, Spain	both	n	n	n	y	n	noise pollution	Leq day	Negative mental health symptoms	depression presented as hospital admission	time	ecological longitudinal study of time series using log linear models	positive		There was found to be an immediate effect between rates of depression when noise levels were high	n/a	n/a	Carrying out similar studies about traffic noise related to anxiety, depression and suicide are needed to corroborate findings	n/a	empirical	n
diaz2020	quantitative	3874	3.5 million	other	hospital admission data	n	Madrid, Spain	both	n	n	n	y	n	noise pollution	Leq day	Negative mental health symptoms	suicide	time	ecological longitudinal study of time series using log linear models	positive		There was found to be a delayed effect between rates of suicide when noise levels were high	n/a	n/a	Carrying out similar studies about traffic noise related to anxiety, depression and suicide are needed to corroborate findings	n/a	empirical	n
diaz2020	quantitative	3874	3.5 million	other	hospital admission data	n	Madrid, Spain	both	n	n	n	y	n	pollution	noise and air	Negative mental health symptoms	anxiety, depression and suicide		ecological longitudinal study of time series using log linear models	positive		Noise pollution has more effect on decreasing mental health than air does	n/a	n/a	Carrying out similar studies about traffic noise related to anxiety, depression and suicide are needed to corroborate findings	n/a	empirical	n
diaz2020	quantitative	3874	3.5 million	other	hospital admission data	n	Madrid, Spain	both	n	n	n	y	n	noise pollution	Leq day	Negative mental health symptoms	psychological impact		ecological longitudinal study of time series using log linear models	postiive		An increase in noise pollution increased psychological impact	n/a	n/a	Carrying out similar studies about traffic noise related to anxiety, depression and suicide are needed to corroborate findings	n/a	empirical	n
ding2016	Quantiative	Residents of New South Wales aged 45+	53144	Other	Recruitment for original cohort study data drawn from not described. This analysis based on a sub-study of the original cohort study.	n	New South Wales, Australia	both	n	n	y	y	Data linkage - data from env science and social science sources	Spatial/GIS meterological data on temperature	Average max daily temperature (degrees C) over 4 week period previous to questionnaire completion	Questionnaire	High or very high psychological distress (Kessler [K10] scale with cutoff applied)	history of physical and mental health (diagnoses), gender, age, educatino, relationship status, language used at home, personal income, reirement status, employment status, population dispersion in area.	Logistic regression/logit	other	Mixed, see summary	When entered into model alone (without vapour pressure), and with vapour pressure temp was sig positively related to reporting high/very high distress, however when a temperature X vapour pressure interaction term was added temp was significantly negatively related to distress.	Future studies will need to account for potential self-selection bas, greater variation in hot and cold weather conditions and younger age groups				empirical	n
ding2016	Quantiative	Residents of New South Wales aged 45+	53144	Other	Recruitment for original cohort study data drawn from not described. This analysis based on a sub-study of the original cohort study.	n	New South Wales, Australia	both	n	n	y	y	Data linkage - data from env science and social science sources	Spatial/GIS meterological data on temperature	Average vapour pressure at 3 pm (hPA) over 4 week period prior to questionnaire completion	Questionnaire	High or very high psychological distress (Kessler [K10] scale with cutoff applied)	history of physical and mental health (diagnoses), gender, age, educatino, relationship status, language used at home, personal income, reirement status, employment status, population dispersion in area.	Logistic regression/logit	other	Mixed, see summary	When entered into model alone (without temperature) vapour pressure was sig positively related to reporting high/very high distress. However when tempartue was added to the model the association between varpuor pressure and MH was not significant. When temperature X vapour pressure interaction term was added there was a significant negative main effect of vapour pressure	Future studies will need to account for potential self-selection bas, greater variation in hot and cold weather conditions and younger age groups				empirical	n
ding2016	Quantiative	Residents of New South Wales aged 45+	53144	Other	Recruitment for original cohort study data drawn from not described. This analysis based on a sub-study of the original cohort study.	n	New South Wales, Australia	both	n	n	y	y	Data linkage - data from env science and social science sources	Spatial/GIS meterological data on temperature	Interaction of average max daily temperature (deg C) x average vapour pressure (hPA)	Questionnaire	High or very high psychological distress (Kessler [K10] scale with cutoff applied)	history of physical and mental health (diagnoses), gender, age, educatino, relationship status, language used at home, personal income, reirement status, employment status, population dispersion in area.	Logistic regression/logit	positive		There was a significant interaction effect of temperature and vapour pressure on psychological distress. At high humidity, the effect of heat on mental health was amplified	Future studies will need to account for potential self-selection bas, greater variation in hot and cold weather conditions and younger age groups				empirical	n
ding2016	Quantiative	Residents of New South Wales aged 45+	53144	Other	Recruitment for original cohort study data drawn from not described. This analysis based on a sub-study of the original cohort study.	n	New South Wales, Australia	both	n	n	y	y	Data linkage - data from env science and social science sources	Spatial/GIS meterological data on temperature	Average max daily temperature (degrees C) over 4 week period previous to questionnaire completion	Questionnaire	Been treated for depression or anxiety over the past 4 weeks (y/n)	history of physical and mental health (diagnoses), gender, age, educatino, relationship status, language used at home, personal income, reirement status, employment status, population dispersion in area.	Logistic regression/logit	null		There were no significant relationships between having been treated for depression/anxiety and any of the temperature or humidity terms.	Future studies will need to account for potential self-selection bas, greater variation in hot and cold weather conditions and younger age groups				empirical	n
ding2016	Quantiative	Residents of New South Wales aged 45+	53144	Other	Recruitment for original cohort study data drawn from not described. This analysis based on a sub-study of the original cohort study.	n	New South Wales, Australia	both	n	n	y	y	Data linkage - data from env science and social science sources	Spatial/GIS meterological data on temperature	Average vapour pressure at 3 pm (hPA) over 4 week period prior to questionnaire completion	Questionnaire	Been treated for depression or anxiety over the past 4 weeks (y/n)	history of physical and mental health (diagnoses), gender, age, educatino, relationship status, language used at home, personal income, reirement status, employment status, population dispersion in area.	Logistic regression/logit	null		There were no significant relationships between having been treated for depression/anxiety and any of the temperature or humidity terms.	Future studies will need to account for potential self-selection bas, greater variation in hot and cold weather conditions and younger age groups				empirical	n
ding2016	Quantiative	Residents of New South Wales aged 45+	53144	Other	Recruitment for original cohort study data drawn from not described. This analysis based on a sub-study of the original cohort study.	n	New South Wales, Australia	both	n	n	y	y	Data linkage - data from env science and social science sources	Spatial/GIS meterological data on temperature	Interaction of average max daily temperature (deg C) x average vapour pressure (hPA)	Questionnaire	Been treated for depression or anxiety over the past 4 weeks (y/n)	history of physical and mental health (diagnoses), gender, age, educatino, relationship status, language used at home, personal income, reirement status, employment status, population dispersion in area.	Logistic regression/logit	null		There were no significant relationships between having been treated for depression/anxiety and any of the temperature or humidity terms.	Future studies will need to account for potential self-selection bas, greater variation in hot and cold weather conditions and younger age groups				empirical	n
dodd2018	qualitative	residents of communities affected by wildfires	30	other	purposive	N	North-west territories Canada	m/h	n	y	n	n	n	presence of wildfires	fire risk	Negative mental health symptoms	fear/stress	voluntary evacuation	iterative reflexive	positive		When there was a fire risk people felt fear and stress	n/a	n/a	Feelings of isolation related to extended periods indoors - need to understand the impacts in relation to stress and anxiety	n/a	empirical	n
dodd2018	qualitative	residents of communities affected by wildfires	30	other	purposive	N	North-west territories Canada	m/h	n	y	n	n	n	presence of wildfires	presence of smoke	Negative mental health symptoms	uncertainty	voluntary evacuation	iterative reflexive	positive		When smoke was present people felt uncertainty	n/a	n/a	Feelings of isolation related to extended periods indoors - need to understand the impacts in relation to stress and anxiety	n/a	empirical	n
dodd2018	qualitative	residents of communities affected by wildfires	30	other	purposive	N	North-west territories Canada	m/h	n	y	n	n	n	presence of wildfires	presence of smoke	Negative mental health symptoms	isolation	voluntary evacuation	iterative reflexive	positive		When smoke was present people felt isolated	n/a	n/a	Feelings of isolation related to extended periods indoors - need to understand the impacts in relation to stress and anxiety	n/a	empirical	n
dodd2018	qualitative	residents of communities affected by wildfires	30	other	purposive	N	North-west territories Canada	m/h	n	y	n	n	n	presence of wildfires	time since disaster	Negative mental health symptoms	worrying	voluntary evacuation	iterative reflexive	positive		As time from the disaster increased people still remained as worried about the fire	n/a	n/a	Feelings of isolation related to extended periods indoors - need to understand the impacts in relation to stress and anxiety	n/a	empirical	n
dodd2018	qualitative	residents of communities affected by wildfires	30	other	purposive	N	North-west territories Canada	m/h	n	y	n	n	n	presence of wildfires	access to land	Negative mental health symptoms	emotional difficulties	voluntary evacuation	iterative reflexive	negative		During the fire is access to land was decreased people felt they faced emotional difficulties	n/a	n/a	Feelings of isolation related to extended periods indoors - need to understand the impacts in relation to stress and anxiety	n/a	empirical	n
dodd2018	qualitative	residents of communities affected by wildfires	30	other	purposive	N	North-west territories Canada	m/h	n	y	n	n	n	presence of wildfires	ability to enjoy environment	Negative mental health symptoms	mental health and wellbeing	voluntary evacuation	iterative reflexive	negative		When wildfires were present people faced mental health and wellbeing difficulties	n/a	n/a	Feelings of isolation related to extended periods indoors - need to understand the impacts in relation to stress and anxiety	n/a	empirical	n
dodd2018	qualitative	residents of communities affected by wildfires	30	other	purposive	N	North-west territories Canada	m/h	n	y	n	n	n	presence of wildfires	presence of fires	Negative mental health symptoms	community wellbeing	voluntary evacuation	iterative reflexive	positive		When wildfires occurred community wellbeing increased	n/a	n/a	Feelings of isolation related to extended periods indoors - need to understand the impacts in relation to stress and anxiety	n/a	empirical	n
dolling2017	Quantiative	adults age 18-65 with high stress levels (as assessed on PSQ)	46 (27 forest setting; 19 handicraft environment)	Other	Mix of convenience (recruitment via advertisements, billboards, etc) and recommendations from HR at the University)	n	Sweden	mh	n	y	n	n	experimental design	comparison between indoor & outdoor environment	managed boreal mixed deciduos outwith the city vs indoor setting for hadicraft; mean light level objectively assessed	self report pre/post intervention	perceived stres (SPQ) - high = greater perceived stress	mood before/after each session; sleep	non-parametric design with 'before/after' and occasion as within-subject factors and environment as a between-subject factor	null		levels of stress reduced after both interventions; no significant difference in change between forest and indoor	not discussed	not discussed	not discussed	long-term studies on participants' health status in years following the interventions	composite	n
dolling2017	Quantiative	adults age 18-65 with high stress levels (as assessed on PSQ)	46 (27 forest setting; 19 handicraft environment)	Other	Mix of convenience (recruitment via advertisements, billboards, etc) and recommendations from HR at the University)	n	Sweden	mh	n	y	n	n	experimental design	comparison between indoor & outdoor environment	managed boreal mixed deciduos outwith the city vs indoor setting for hadicraft; mean light level objectively assessed	self report pre/post intervention	Burnout (Shirom-Melamed Burnout Q'naire)	mood before/after each session; sleep	non-parametric design with 'before/after' and occasion as within-subject factors and environment as a between-subject factor	null		levels of burnout reduced after both interventions; no significant difference in change between forest and indoor	not discussed	not discussed	not discussed	long-term studies on participants' health status in years following the interventions	composite	n
dolling2017	Quantiative	adults age 18-65 with high stress levels (as assessed on PSQ)	46 (27 forest setting; 19 handicraft environment)	Other	Mix of convenience (recruitment via advertisements, billboards, etc) and recommendations from HR at the University)	n	Sweden	mh	n	y	n	n	experimental design	comparison between indoor & outdoor environment	managed boreal mixed deciduos outwith the city vs indoor setting for hadicraft; mean light level objectively assessed	self report pre/post intervention	General mental health (SF-36)	mood before/after each session; sleep	non-parametric design with 'before/after' and occasion as within-subject factors and environment as a between-subject factor	null		mental health improved after both interventions; no significant difference between the two settings	not discussed	not discussed	not discussed	long-term studies on participants' health status in years following the interventions	composite	n
dolling2017	Quantiative	adults age 18-65 with high stress levels (as assessed on PSQ)	46 (27 forest setting; 19 handicraft environment)	Other	Mix of convenience (recruitment via advertisements, billboards, etc) and recommendations from HR at the University)	n	Sweden	mh	n	y	n	n	experimental design	comparison between indoor & outdoor environment	managed boreal mixed deciduos outwith the city vs indoor setting for hadicraft; mean light level objectively assessed	self report pre/post intervention	Self-esteem (Self-concept q'naire [SCQ]	mood before/after each session; sleep	non-parametric design with 'before/after' and occasion as within-subject factors and environment as a between-subject factor	null		no change in self esteem pre-post or between the two environments	not discussed	not discussed	not discussed	long-term studies on participants' health status in years following the interventions	composite	n
dolling2017	Quantiative	adults age 18-65 with high stress levels (as assessed on PSQ)	46 (27 forest setting; 19 handicraft environment)	Other	Mix of convenience (recruitment via advertisements, billboards, etc) and recommendations from HR at the University)	n	Sweden	mh	n	y	n	n	experimental design	comparison between indoor & outdoor environment	managed boreal mixed deciduos outwith the city vs indoor setting for hadicraft; mean light level objectively assessed	self report after each session	perceived restorativeness of environment; mean light level objectively assessed	mood before/after each session; sleep	ordinal logistic regression	positive		forests perceived as 'fitting together more naturally' and 'secretive and mysterious' compared to indoor setting	not discussed	not discussed	not discussed	what characteristics of environment promote restoration	composite	n
donnelly2016																												y	review
dreger2015	Quantiative	1st and 4th grade Primary school children in selected city and region in Germany	1185	Other	No sampling - All parents of children starting school in city of Ingolstadta nd rural district of Gunzberg were invited to participate; then parents of children in 4th grade invited in follow up 4 years later.	y	Bavaria, Germany	both	n	y	n	n	Longitudinal, Cohort study	Questionnaire on parental reports of noise annoyance at home from different sources, using standardised questions of the International Commission on Biological Effects of Noise	Road traffic noise (day) - increased noise exposure between t0 (1st grade) to t1 (4th grade) - i.e. negative change of at least one point on likert-type scale	Questionnaire filled out by parents	Negative change in emotional symptoms (from normal to borderline/abnormal or from borderline to abnormal), parental version of Strengths and Difficulties Questionnaire (SDQ)	no. of siblings, early bioligcal risk (premature/low birth weight), crowding, second hand smoke, physical activity, single parent, parental education, partenal unemployment, household income, migration background.	Regression (poisson)	null		No significant effect	More cohort studies are needed to confirm results in schildren.	Future cohort sutdies should incorporate objectively assessed noise exposure with additional data on annoyance and noise insulation			empirical	n
dreger2015	Quantiative	1st and 4th grade Primary school children in selected city and region in Germany	1185	Other	No sampling - All parents of children starting school in city of Ingolstadta nd rural district of Gunzberg were invited to participate; then parents of children in 4th grade invited in follow up 4 years later.	y	Bavaria, Germany	both	n	y	n	n	Longitudinal, Cohort study	Questionnaire on parental reports of noise annoyance at home from different sources, using standardised questions of the International Commission on Biological Effects of Noise	Road traffic noise (day) - increased noise exposure between t0 (1st grade) to t1 (4th grade) - i.e. negative change of at least one point on likert-type scale	Questionnaire filled out by parents	Negative change in conduct problems (from normal to borderline/abnormal or from borderline to abnormal), parental version of Strengths and Difficulties Questionnaire (SDQ)	no. of siblings, early bioligcal risk (premature/low birth weight), crowding, second hand smoke, physical activity, single parent, parental education, partenal unemployment, household income, migration background.	Regression (poisson)	null		No significant effect	More cohort studies are needed to confirm results in schildren.	Future cohort sutdies should incorporate objectively assessed noise exposure with additional data on annoyance and noise insulation			empirical	n
dreger2015	Quantiative	1st and 4th grade Primary school children in selected city and region in Germany	1185	Other	No sampling - All parents of children starting school in city of Ingolstadta nd rural district of Gunzberg were invited to participate; then parents of children in 4th grade invited in follow up 4 years later.	y	Bavaria, Germany	both	n	y	n	n	Longitudinal, Cohort study	Questionnaire on parental reports of noise annoyance at home from different sources, using standardised questions of the International Commission on Biological Effects of Noise	Road traffic noise (day) - increased noise exposure between t0 (1st grade) to t1 (4th grade) - i.e. negative change of at least one point on likert-type scale	Questionnaire filled out by parents	Negative change in hyperactivity (from normal to borderline/abnormal or from borderline to abnormal), parental version of Strengths and Difficulties Questionnaire (SDQ)	no. of siblings, early bioligcal risk (premature/low birth weight), crowding, second hand smoke, physical activity, single parent, parental education, partenal unemployment, household income, migration background.	Regression (poisson)	null		No significant effect	More cohort studies are needed to confirm results in schildren.	Future cohort sutdies should incorporate objectively assessed noise exposure with additional data on annoyance and noise insulation			empirical	n
dreger2015	Quantiative	1st and 4th grade Primary school children in selected city and region in Germany	1185	Other	No sampling - All parents of children starting school in city of Ingolstadta nd rural district of Gunzberg were invited to participate; then parents of children in 4th grade invited in follow up 4 years later.	y	Bavaria, Germany	both	n	y	n	n	Longitudinal, Cohort study	Questionnaire on parental reports of noise annoyance at home from different sources, using standardised questions of the International Commission on Biological Effects of Noise	Road traffic noise (day) - increased noise exposure between t0 (1st grade) to t1 (4th grade) - i.e. negative change of at least one point on likert-type scale	Questionnaire filled out by parents	Negative change in peer relationship problems (from normal to borderline/abnormal or from borderline to abnormal), parental version of Strengths and Difficulties Questionnaire (SDQ)	no. of siblings, early bioligcal risk (premature/low birth weight), crowding, second hand smoke, physical activity, single parent, parental education, partenal unemployment, household income, migration background.	Regression (poisson)	null		No significant effect	More cohort studies are needed to confirm results in schildren.	Future cohort sutdies should incorporate objectively assessed noise exposure with additional data on annoyance and noise insulation			empirical	n
dreger2015	Quantiative	1st and 4th grade Primary school children in selected city and region in Germany	1185	Other	No sampling - All parents of children starting school in city of Ingolstadta nd rural district of Gunzberg were invited to participate; then parents of children in 4th grade invited in follow up 4 years later.	y	Bavaria, Germany	both	n	y	n	n	Longitudinal, Cohort study	Questionnaire on parental reports of noise annoyance at home from different sources, using standardised questions of the International Commission on Biological Effects of Noise	Road traffic noise (day) - increased noise exposure between t0 (1st grade) to t1 (4th grade) - i.e. negative change of at least one point on likert-type scale	Questionnaire filled out by parents	Negative change in overall problem score (from normal to borderline/abnormal or from borderline to abnormal), parental version of Strengths and Difficulties Questionnaire (SDQ)	no. of siblings, early bioligcal risk (premature/low birth weight), crowding, second hand smoke, physical activity, single parent, parental education, partenal unemployment, household income, migration background.	Regression (poisson)	null		No significant effect	More cohort studies are needed to confirm results in schildren.	Future cohort sutdies should incorporate objectively assessed noise exposure with additional data on annoyance and noise insulation			empirical	n
dreger2015	Quantiative	1st and 4th grade Primary school children in selected city and region in Germany	1185	Other	No sampling - All parents of children starting school in city of Ingolstadta nd rural district of Gunzberg were invited to participate; then parents of children in 4th grade invited in follow up 4 years later.	y	Bavaria, Germany	both	n	y	n	n	Longitudinal, Cohort study	Questionnaire on parental reports of noise annoyance at home from different sources, using standardised questions of the International Commission on Biological Effects of Noise	Road traffic noise (night) - increased noise exposure between t0 (1st grade) to t1 (4th grade) - i.e. negative change of at least one point on likert-type scale	Questionnaire filled out by parents	Negative change in emotional symptoms (from normal to borderline/abnormal or from borderline to abnormal), parental version of Strengths and Difficulties Questionnaire (SDQ)	no. of siblings, early bioligcal risk (premature/low birth weight), crowding, second hand smoke, physical activity, single parent, parental education, partenal unemployment, household income, migration background.	Regression (poisson)	positive		Increased exposure to nightime traffic noise was associated with greater likelihood of reporting increased emotional problems	More cohort studies are needed to confirm results in schildren.	Future cohort sutdies should incorporate objectively assessed noise exposure with additional data on annoyance and noise insulation			empirical	n
dreger2015	Quantiative	1st and 4th grade Primary school children in selected city and region in Germany	1185	Other	No sampling - All parents of children starting school in city of Ingolstadta nd rural district of Gunzberg were invited to participate; then parents of children in 4th grade invited in follow up 4 years later.	y	Bavaria, Germany	both	n	y	n	n	Longitudinal, Cohort study	Questionnaire on parental reports of noise annoyance at home from different sources, using standardised questions of the International Commission on Biological Effects of Noise	Road traffic noise (night) - increased noise exposure between t0 (1st grade) to t1 (4th grade) - i.e. negative change of at least one point on likert-type scale	Questionnaire filled out by parents	Negative change in conduct problems (from normal to borderline/abnormal or from borderline to abnormal), parental version of Strengths and Difficulties Questionnaire (SDQ)	no. of siblings, early bioligcal risk (premature/low birth weight), crowding, second hand smoke, physical activity, single parent, parental education, partenal unemployment, household income, migration background.	Regression (poisson)	positive		Increased exposure to nightime traffic noise was associated with greater likelihood of reporting increased conduct problems	More cohort studies are needed to confirm results in schildren.	Future cohort sutdies should incorporate objectively assessed noise exposure with additional data on annoyance and noise insulation			empirical	n
dreger2015	Quantiative	1st and 4th grade Primary school children in selected city and region in Germany	1185	Other	No sampling - All parents of children starting school in city of Ingolstadta nd rural district of Gunzberg were invited to participate; then parents of children in 4th grade invited in follow up 4 years later.	y	Bavaria, Germany	both	n	y	n	n	Longitudinal, Cohort study	Questionnaire on parental reports of noise annoyance at home from different sources, using standardised questions of the International Commission on Biological Effects of Noise	Road traffic noise (night) - increased noise exposure between t0 (1st grade) to t1 (4th grade) - i.e. negative change of at least one point on likert-type scale	Questionnaire filled out by parents	Negative change in hyperactivity (from normal to borderline/abnormal or from borderline to abnormal), parental version of Strengths and Difficulties Questionnaire (SDQ)	no. of siblings, early bioligcal risk (premature/low birth weight), crowding, second hand smoke, physical activity, single parent, parental education, partenal unemployment, household income, migration background.	Regression (poisson)	null		No significant effect	More cohort studies are needed to confirm results in schildren.	Future cohort sutdies should incorporate objectively assessed noise exposure with additional data on annoyance and noise insulation			empirical	n
dreger2015	Quantiative	1st and 4th grade Primary school children in selected city and region in Germany	1185	Other	No sampling - All parents of children starting school in city of Ingolstadta nd rural district of Gunzberg were invited to participate; then parents of children in 4th grade invited in follow up 4 years later.	y	Bavaria, Germany	both	n	y	n	n	Longitudinal, Cohort study	Questionnaire on parental reports of noise annoyance at home from different sources, using standardised questions of the International Commission on Biological Effects of Noise	Road traffic noise (night) - increased noise exposure between t0 (1st grade) to t1 (4th grade) - i.e. negative change of at least one point on likert-type scale	Questionnaire filled out by parents	Negative change in peer relationship problems (from normal to borderline/abnormal or from borderline to abnormal), parental version of Strengths and Difficulties Questionnaire (SDQ)	no. of siblings, early bioligcal risk (premature/low birth weight), crowding, second hand smoke, physical activity, single parent, parental education, partenal unemployment, household income, migration background.	Regression (poisson)	null		No significant effect	More cohort studies are needed to confirm results in schildren.	Future cohort sutdies should incorporate objectively assessed noise exposure with additional data on annoyance and noise insulation			empirical	n
dreger2015	Quantiative	1st and 4th grade Primary school children in selected city and region in Germany	1185	Other	No sampling - All parents of children starting school in city of Ingolstadta nd rural district of Gunzberg were invited to participate; then parents of children in 4th grade invited in follow up 4 years later.	y	Bavaria, Germany	both	n	y	n	n	Longitudinal, Cohort study	Questionnaire on parental reports of noise annoyance at home from different sources, using standardised questions of the International Commission on Biological Effects of Noise	Road traffic noise (night) - increased noise exposure between t0 (1st grade) to t1 (4th grade) - i.e. negative change of at least one point on likert-type scale	Questionnaire filled out by parents	Negative change in overall problem score (from normal to borderline/abnormal or from borderline to abnormal), parental version of Strengths and Difficulties Questionnaire (SDQ)	no. of siblings, early bioligcal risk (premature/low birth weight), crowding, second hand smoke, physical activity, single parent, parental education, partenal unemployment, household income, migration background.	Regression (poisson)	positive		Increased exposure to nightime traffic noise was associated with greater likelihood of reporting a negative change in overall problems score	More cohort studies are needed to confirm results in schildren.	Future cohort sutdies should incorporate objectively assessed noise exposure with additional data on annoyance and noise insulation			empirical	n
dreger2015	Quantiative	1st and 4th grade Primary school children in selected city and region in Germany	1185	Other	No sampling - All parents of children starting school in city of Ingolstadta nd rural district of Gunzberg were invited to participate; then parents of children in 4th grade invited in follow up 4 years later.	y	Bavaria, Germany	both	n	y	n	n	Longitudinal, Cohort study	Questionnaire on parental reports of noise annoyance at home from different sources, using standardised questions of the International Commission on Biological Effects of Noise	Aircraft noise (day) - increased noise exposure between t0 (1st grade) to t1 (4th grade) - i.e. negative change of at least one point on likert-type scale	Questionnaire filled out by parents	Negative change in emotional symptoms (from normal to borderline/abnormal or from borderline to abnormal), parental version of Strengths and Difficulties Questionnaire (SDQ)	no. of siblings, early bioligcal risk (premature/low birth weight), crowding, second hand smoke, physical activity, single parent, parental education, partenal unemployment, household income, migration background.	Regression (poisson)	null		No significant effect	More cohort studies are needed to confirm results in schildren.	Future cohort sutdies should incorporate objectively assessed noise exposure with additional data on annoyance and noise insulation			empirical	n
dreger2015	Quantiative	1st and 4th grade Primary school children in selected city and region in Germany	1185	Other	No sampling - All parents of children starting school in city of Ingolstadta nd rural district of Gunzberg were invited to participate; then parents of children in 4th grade invited in follow up 4 years later.	y	Bavaria, Germany	both	n	y	n	n	Longitudinal, Cohort study	Questionnaire on parental reports of noise annoyance at home from different sources, using standardised questions of the International Commission on Biological Effects of Noise	Aircraft noise (day) - increased noise exposure between t0 (1st grade) to t1 (4th grade) - i.e. negative change of at least one point on likert-type scale	Questionnaire filled out by parents	Negative change in conduct problems (from normal to borderline/abnormal or from borderline to abnormal), parental version of Strengths and Difficulties Questionnaire (SDQ)	no. of siblings, early bioligcal risk (premature/low birth weight), crowding, second hand smoke, physical activity, single parent, parental education, partenal unemployment, household income, migration background.	Regression (poisson)	null		No significant effect	More cohort studies are needed to confirm results in schildren.	Future cohort sutdies should incorporate objectively assessed noise exposure with additional data on annoyance and noise insulation			empirical	n
dreger2015	Quantiative	1st and 4th grade Primary school children in selected city and region in Germany	1185	Other	No sampling - All parents of children starting school in city of Ingolstadta nd rural district of Gunzberg were invited to participate; then parents of children in 4th grade invited in follow up 4 years later.	y	Bavaria, Germany	both	n	y	n	n	Longitudinal, Cohort study	Questionnaire on parental reports of noise annoyance at home from different sources, using standardised questions of the International Commission on Biological Effects of Noise	Aircraft noise (day) - increased noise exposure between t0 (1st grade) to t1 (4th grade) - i.e. negative change of at least one point on likert-type scale	Questionnaire filled out by parents	Negative change in hyperactivity (from normal to borderline/abnormal or from borderline to abnormal), parental version of Strengths and Difficulties Questionnaire (SDQ)	no. of siblings, early bioligcal risk (premature/low birth weight), crowding, second hand smoke, physical activity, single parent, parental education, partenal unemployment, household income, migration background.	Regression (poisson)	null		No significant effect	More cohort studies are needed to confirm results in schildren.	Future cohort sutdies should incorporate objectively assessed noise exposure with additional data on annoyance and noise insulation			empirical	n
dreger2015	Quantiative	1st and 4th grade Primary school children in selected city and region in Germany	1185	Other	No sampling - All parents of children starting school in city of Ingolstadta nd rural district of Gunzberg were invited to participate; then parents of children in 4th grade invited in follow up 4 years later.	y	Bavaria, Germany	both	n	y	n	n	Longitudinal, Cohort study	Questionnaire on parental reports of noise annoyance at home from different sources, using standardised questions of the International Commission on Biological Effects of Noise	Aircraft noise (day) - increased noise exposure between t0 (1st grade) to t1 (4th grade) - i.e. negative change of at least one point on likert-type scale	Questionnaire filled out by parents	Negative change in peer relationship problems (from normal to borderline/abnormal or from borderline to abnormal), parental version of Strengths and Difficulties Questionnaire (SDQ)	no. of siblings, early bioligcal risk (premature/low birth weight), crowding, second hand smoke, physical activity, single parent, parental education, partenal unemployment, household income, migration background.	Regression (poisson)	null		No significant effect	More cohort studies are needed to confirm results in schildren.	Future cohort sutdies should incorporate objectively assessed noise exposure with additional data on annoyance and noise insulation			empirical	n
dreger2015	Quantiative	1st and 4th grade Primary school children in selected city and region in Germany	1185	Other	No sampling - All parents of children starting school in city of Ingolstadta nd rural district of Gunzberg were invited to participate; then parents of children in 4th grade invited in follow up 4 years later.	y	Bavaria, Germany	both	n	y	n	n	Longitudinal, Cohort study	Questionnaire on parental reports of noise annoyance at home from different sources, using standardised questions of the International Commission on Biological Effects of Noise	Aircraft noise (day) - increased noise exposure between t0 (1st grade) to t1 (4th grade) - i.e. negative change of at least one point on likert-type scale	Questionnaire filled out by parents	Negative change in overall problem score (from normal to borderline/abnormal or from borderline to abnormal), parental version of Strengths and Difficulties Questionnaire (SDQ)	no. of siblings, early bioligcal risk (premature/low birth weight), crowding, second hand smoke, physical activity, single parent, parental education, partenal unemployment, household income, migration background.	Regression (poisson)	null		No significant effect	More cohort studies are needed to confirm results in schildren.	Future cohort sutdies should incorporate objectively assessed noise exposure with additional data on annoyance and noise insulation			empirical	n
dreger2015	Quantiative	1st and 4th grade Primary school children in selected city and region in Germany	1185	Other	No sampling - All parents of children starting school in city of Ingolstadta nd rural district of Gunzberg were invited to participate; then parents of children in 4th grade invited in follow up 4 years later.	y	Bavaria, Germany	both	n	y	n	n	Longitudinal, Cohort study	Questionnaire on parental reports of noise annoyance at home from different sources, using standardised questions of the International Commission on Biological Effects of Noise	Construction work (day) - increased noise exposure between t0 (1st grade) to t1 (4th grade) - i.e. negative change of at least one point on likert-type scale	Questionnaire filled out by parents	Negative change in emotional symptoms (from normal to borderline/abnormal or from borderline to abnormal), parental version of Strengths and Difficulties Questionnaire (SDQ)	no. of siblings, early bioligcal risk (premature/low birth weight), crowding, second hand smoke, physical activity, single parent, parental education, partenal unemployment, household income, migration background.	Regression (poisson)	null		No significant effect	More cohort studies are needed to confirm results in schildren.	Future cohort sutdies should incorporate objectively assessed noise exposure with additional data on annoyance and noise insulation			empirical	n
dreger2015	Quantiative	1st and 4th grade Primary school children in selected city and region in Germany	1185	Other	No sampling - All parents of children starting school in city of Ingolstadta nd rural district of Gunzberg were invited to participate; then parents of children in 4th grade invited in follow up 4 years later.	y	Bavaria, Germany	both	n	y	n	n	Longitudinal, Cohort study	Questionnaire on parental reports of noise annoyance at home from different sources, using standardised questions of the International Commission on Biological Effects of Noise	Construction work (day) - increased noise exposure between t0 (1st grade) to t1 (4th grade) - i.e. negative change of at least one point on likert-type scale	Questionnaire filled out by parents	Negative change in conduct problems (from normal to borderline/abnormal or from borderline to abnormal), parental version of Strengths and Difficulties Questionnaire (SDQ)	no. of siblings, early bioligcal risk (premature/low birth weight), crowding, second hand smoke, physical activity, single parent, parental education, partenal unemployment, household income, migration background.	Regression (poisson)	null		No significant effect	More cohort studies are needed to confirm results in schildren.	Future cohort sutdies should incorporate objectively assessed noise exposure with additional data on annoyance and noise insulation			empirical	n
dreger2015	Quantiative	1st and 4th grade Primary school children in selected city and region in Germany	1185	Other	No sampling - All parents of children starting school in city of Ingolstadta nd rural district of Gunzberg were invited to participate; then parents of children in 4th grade invited in follow up 4 years later.	y	Bavaria, Germany	both	n	y	n	n	Longitudinal, Cohort study	Questionnaire on parental reports of noise annoyance at home from different sources, using standardised questions of the International Commission on Biological Effects of Noise	Construction work (day) - increased noise exposure between t0 (1st grade) to t1 (4th grade) - i.e. negative change of at least one point on likert-type scale	Questionnaire filled out by parents	Negative change in hyperactivity (from normal to borderline/abnormal or from borderline to abnormal), parental version of Strengths and Difficulties Questionnaire (SDQ)	no. of siblings, early bioligcal risk (premature/low birth weight), crowding, second hand smoke, physical activity, single parent, parental education, partenal unemployment, household income, migration background.	Regression (poisson)	null		No significant effect	More cohort studies are needed to confirm results in schildren.	Future cohort sutdies should incorporate objectively assessed noise exposure with additional data on annoyance and noise insulation			empirical	n
dreger2015	Quantiative	1st and 4th grade Primary school children in selected city and region in Germany	1185	Other	No sampling - All parents of children starting school in city of Ingolstadta nd rural district of Gunzberg were invited to participate; then parents of children in 4th grade invited in follow up 4 years later.	y	Bavaria, Germany	both	n	y	n	n	Longitudinal, Cohort study	Questionnaire on parental reports of noise annoyance at home from different sources, using standardised questions of the International Commission on Biological Effects of Noise	Construction work (day) - increased noise exposure between t0 (1st grade) to t1 (4th grade) - i.e. negative change of at least one point on likert-type scale	Questionnaire filled out by parents	Negative change in peer relationship problems (from normal to borderline/abnormal or from borderline to abnormal), parental version of Strengths and Difficulties Questionnaire (SDQ)	no. of siblings, early bioligcal risk (premature/low birth weight), crowding, second hand smoke, physical activity, single parent, parental education, partenal unemployment, household income, migration background.	Regression (poisson)	null		No significant effect	More cohort studies are needed to confirm results in schildren.	Future cohort sutdies should incorporate objectively assessed noise exposure with additional data on annoyance and noise insulation			empirical	n
dreger2015	Quantiative	1st and 4th grade Primary school children in selected city and region in Germany	1185	Other	No sampling - All parents of children starting school in city of Ingolstadta nd rural district of Gunzberg were invited to participate; then parents of children in 4th grade invited in follow up 4 years later.	y	Bavaria, Germany	both	n	y	n	n	Longitudinal, Cohort study	Questionnaire on parental reports of noise annoyance at home from different sources, using standardised questions of the International Commission on Biological Effects of Noise	Construction work (day) - increased noise exposure between t0 (1st grade) to t1 (4th grade) - i.e. negative change of at least one point on likert-type scale	Questionnaire filled out by parents	Negative change in overall problem score (from normal to borderline/abnormal or from borderline to abnormal), parental version of Strengths and Difficulties Questionnaire (SDQ)	no. of siblings, early bioligcal risk (premature/low birth weight), crowding, second hand smoke, physical activity, single parent, parental education, partenal unemployment, household income, migration background.	Regression (poisson)	null		No significant effect	More cohort studies are needed to confirm results in schildren.	Future cohort sutdies should incorporate objectively assessed noise exposure with additional data on annoyance and noise insulation			empirical	n
dreger2015	Quantiative	1st and 4th grade Primary school children in selected city and region in Germany	1185	Other	No sampling - All parents of children starting school in city of Ingolstadta nd rural district of Gunzberg were invited to participate; then parents of children in 4th grade invited in follow up 4 years later.	y	Bavaria, Germany	both	n	y	n	n	Longitudinal, Cohort study	Questionnaire on parental reports of noise annoyance at home from different sources, using standardised questions of the International Commission on Biological Effects of Noise	Neighbours noise (day) - increased noise exposure between t0 (1st grade) to t1 (4th grade) - i.e. negative change of at least one point on likert-type scale	Questionnaire filled out by parents	Negative change in emotional symptoms (from normal to borderline/abnormal or from borderline to abnormal), parental version of Strengths and Difficulties Questionnaire (SDQ)	no. of siblings, early bioligcal risk (premature/low birth weight), crowding, second hand smoke, physical activity, single parent, parental education, partenal unemployment, household income, migration background.	Regression (poisson)	null		No significant effect	More cohort studies are needed to confirm results in schildren.	Future cohort sutdies should incorporate objectively assessed noise exposure with additional data on annoyance and noise insulation			empirical	n
dreger2015	Quantiative	1st and 4th grade Primary school children in selected city and region in Germany	1185	Other	No sampling - All parents of children starting school in city of Ingolstadta nd rural district of Gunzberg were invited to participate; then parents of children in 4th grade invited in follow up 4 years later.	y	Bavaria, Germany	both	n	y	n	n	Longitudinal, Cohort study	Questionnaire on parental reports of noise annoyance at home from different sources, using standardised questions of the International Commission on Biological Effects of Noise	Neighbours noise (day) - increased noise exposure between t0 (1st grade) to t1 (4th grade) - i.e. negative change of at least one point on likert-type scale	Questionnaire filled out by parents	Negative change in conduct problems (from normal to borderline/abnormal or from borderline to abnormal), parental version of Strengths and Difficulties Questionnaire (SDQ)	no. of siblings, early bioligcal risk (premature/low birth weight), crowding, second hand smoke, physical activity, single parent, parental education, partenal unemployment, household income, migration background.	Regression (poisson)	positive		Increased exposure to daytime neighbour noise associated with greater likelihood of reporting increased conduct problems	More cohort studies are needed to confirm results in schildren.	Future cohort sutdies should incorporate objectively assessed noise exposure with additional data on annoyance and noise insulation			empirical	n
dreger2015	Quantiative	1st and 4th grade Primary school children in selected city and region in Germany	1185	Other	No sampling - All parents of children starting school in city of Ingolstadta nd rural district of Gunzberg were invited to participate; then parents of children in 4th grade invited in follow up 4 years later.	y	Bavaria, Germany	both	n	y	n	n	Longitudinal, Cohort study	Questionnaire on parental reports of noise annoyance at home from different sources, using standardised questions of the International Commission on Biological Effects of Noise	Neighbours noise (day) - increased noise exposure between t0 (1st grade) to t1 (4th grade) - i.e. negative change of at least one point on likert-type scale	Questionnaire filled out by parents	Negative change in hyperactivity (from normal to borderline/abnormal or from borderline to abnormal), parental version of Strengths and Difficulties Questionnaire (SDQ)	no. of siblings, early bioligcal risk (premature/low birth weight), crowding, second hand smoke, physical activity, single parent, parental education, partenal unemployment, household income, migration background.	Regression (poisson)	positive		Increased exposure to daytime neighbour noise associated with greater likelihood of reporting increased hyperactivity problems	More cohort studies are needed to confirm results in schildren.	Future cohort sutdies should incorporate objectively assessed noise exposure with additional data on annoyance and noise insulation			empirical	n
dreger2015	Quantiative	1st and 4th grade Primary school children in selected city and region in Germany	1185	Other	No sampling - All parents of children starting school in city of Ingolstadta nd rural district of Gunzberg were invited to participate; then parents of children in 4th grade invited in follow up 4 years later.	y	Bavaria, Germany	both	n	y	n	n	Longitudinal, Cohort study	Questionnaire on parental reports of noise annoyance at home from different sources, using standardised questions of the International Commission on Biological Effects of Noise	Neighbours noise (day) - increased noise exposure between t0 (1st grade) to t1 (4th grade) - i.e. negative change of at least one point on likert-type scale	Questionnaire filled out by parents	Negative change in peer relationship problems (from normal to borderline/abnormal or from borderline to abnormal), parental version of Strengths and Difficulties Questionnaire (SDQ)	no. of siblings, early bioligcal risk (premature/low birth weight), crowding, second hand smoke, physical activity, single parent, parental education, partenal unemployment, household income, migration background.	Regression (poisson)	null		No significant effect	More cohort studies are needed to confirm results in schildren.	Future cohort sutdies should incorporate objectively assessed noise exposure with additional data on annoyance and noise insulation			empirical	n
dreger2015	Quantiative	1st and 4th grade Primary school children in selected city and region in Germany	1185	Other	No sampling - All parents of children starting school in city of Ingolstadta nd rural district of Gunzberg were invited to participate; then parents of children in 4th grade invited in follow up 4 years later.	y	Bavaria, Germany	both	n	y	n	n	Longitudinal, Cohort study	Questionnaire on parental reports of noise annoyance at home from different sources, using standardised questions of the International Commission on Biological Effects of Noise	Neighbours noise (day) - increased noise exposure between t0 (1st grade) to t1 (4th grade) - i.e. negative change of at least one point on likert-type scale	Questionnaire filled out by parents	Negative change in overall problem score (from normal to borderline/abnormal or from borderline to abnormal), parental version of Strengths and Difficulties Questionnaire (SDQ)	no. of siblings, early bioligcal risk (premature/low birth weight), crowding, second hand smoke, physical activity, single parent, parental education, partenal unemployment, household income, migration background.	Regression (poisson)	null		No significant effect	More cohort studies are needed to confirm results in schildren.	Future cohort sutdies should incorporate objectively assessed noise exposure with additional data on annoyance and noise insulation			empirical	n
dreger2015	Quantiative	1st and 4th grade Primary school children in selected city and region in Germany	1185	Other	No sampling - All parents of children starting school in city of Ingolstadta nd rural district of Gunzberg were invited to participate; then parents of children in 4th grade invited in follow up 4 years later.	y	Bavaria, Germany	both	n	y	n	n	Longitudinal, Cohort study	Questionnaire on parental reports of noise annoyance at home from different sources, using standardised questions of the International Commission on Biological Effects of Noise	Neighbours noise (night) - increased noise exposure between t0 (1st grade) to t1 (4th grade) - i.e. negative change of at least one point on likert-type scale	Questionnaire filled out by parents	Negative change in emotional symptoms (from normal to borderline/abnormal or from borderline to abnormal), parental version of Strengths and Difficulties Questionnaire (SDQ)	no. of siblings, early bioligcal risk (premature/low birth weight), crowding, second hand smoke, physical activity, single parent, parental education, partenal unemployment, household income, migration background.	Regression (poisson)	null		No significant effect	More cohort studies are needed to confirm results in schildren.	Future cohort sutdies should incorporate objectively assessed noise exposure with additional data on annoyance and noise insulation			empirical	n
dreger2015	Quantiative	1st and 4th grade Primary school children in selected city and region in Germany	1185	Other	No sampling - All parents of children starting school in city of Ingolstadta nd rural district of Gunzberg were invited to participate; then parents of children in 4th grade invited in follow up 4 years later.	y	Bavaria, Germany	both	n	y	n	n	Longitudinal, Cohort study	Questionnaire on parental reports of noise annoyance at home from different sources, using standardised questions of the International Commission on Biological Effects of Noise	Neighbours noise (day) - increased noise exposure between t0 (1st grade) to t1 (4th grade) - i.e. negative change of at least one point on likert-type scale	Questionnaire filled out by parents	Negative change in conduct problems (from normal to borderline/abnormal or from borderline to abnormal), parental version of Strengths and Difficulties Questionnaire (SDQ)	no. of siblings, early bioligcal risk (premature/low birth weight), crowding, second hand smoke, physical activity, single parent, parental education, partenal unemployment, household income, migration background.	Regression (poisson)	null		No significant effect	More cohort studies are needed to confirm results in schildren.	Future cohort sutdies should incorporate objectively assessed noise exposure with additional data on annoyance and noise insulation			empirical	n
dreger2015	Quantiative	1st and 4th grade Primary school children in selected city and region in Germany	1185	Other	No sampling - All parents of children starting school in city of Ingolstadta nd rural district of Gunzberg were invited to participate; then parents of children in 4th grade invited in follow up 4 years later.	y	Bavaria, Germany	both	n	y	n	n	Longitudinal, Cohort study	Questionnaire on parental reports of noise annoyance at home from different sources, using standardised questions of the International Commission on Biological Effects of Noise	Neighbours noise (day) - increased noise exposure between t0 (1st grade) to t1 (4th grade) - i.e. negative change of at least one point on likert-type scale	Questionnaire filled out by parents	Negative change in hyperactivity (from normal to borderline/abnormal or from borderline to abnormal), parental version of Strengths and Difficulties Questionnaire (SDQ)	no. of siblings, early bioligcal risk (premature/low birth weight), crowding, second hand smoke, physical activity, single parent, parental education, partenal unemployment, household income, migration background.	Regression (poisson)	null		No significant effect	More cohort studies are needed to confirm results in schildren.	Future cohort sutdies should incorporate objectively assessed noise exposure with additional data on annoyance and noise insulation			empirical	n
dreger2015	Quantiative	1st and 4th grade Primary school children in selected city and region in Germany	1185	Other	No sampling - All parents of children starting school in city of Ingolstadta nd rural district of Gunzberg were invited to participate; then parents of children in 4th grade invited in follow up 4 years later.	y	Bavaria, Germany	both	n	y	n	n	Longitudinal, Cohort study	Questionnaire on parental reports of noise annoyance at home from different sources, using standardised questions of the International Commission on Biological Effects of Noise	Neighbours noise (day) - increased noise exposure between t0 (1st grade) to t1 (4th grade) - i.e. negative change of at least one point on likert-type scale	Questionnaire filled out by parents	Negative change in peer relationship problems (from normal to borderline/abnormal or from borderline to abnormal), parental version of Strengths and Difficulties Questionnaire (SDQ)	no. of siblings, early bioligcal risk (premature/low birth weight), crowding, second hand smoke, physical activity, single parent, parental education, partenal unemployment, household income, migration background.	Regression (poisson)	null		No significant effect	More cohort studies are needed to confirm results in schildren.	Future cohort sutdies should incorporate objectively assessed noise exposure with additional data on annoyance and noise insulation			empirical	n
dreger2015	Quantiative	1st and 4th grade Primary school children in selected city and region in Germany	1185	Other	No sampling - All parents of children starting school in city of Ingolstadta nd rural district of Gunzberg were invited to participate; then parents of children in 4th grade invited in follow up 4 years later.	y	Bavaria, Germany	both	n	y	n	n	Longitudinal, Cohort study	Questionnaire on parental reports of noise annoyance at home from different sources, using standardised questions of the International Commission on Biological Effects of Noise	Neighbours noise (day) - increased noise exposure between t0 (1st grade) to t1 (4th grade) - i.e. negative change of at least one point on likert-type scale	Questionnaire filled out by parents	Negative change in overall problem score (from normal to borderline/abnormal or from borderline to abnormal), parental version of Strengths and Difficulties Questionnaire (SDQ)	no. of siblings, early bioligcal risk (premature/low birth weight), crowding, second hand smoke, physical activity, single parent, parental education, partenal unemployment, household income, migration background.	Regression (poisson)	null		No significant effect	More cohort studies are needed to confirm results in schildren.	Future cohort sutdies should incorporate objectively assessed noise exposure with additional data on annoyance and noise insulation			empirical	n
drescher2014	Quantiative	Adult clients of mental health services	1119	Other	Not stated	n	Mississippi, USA	mh	n	y	n	n		Oil spill	Effects of oil spill on lives	Survey	Depression scale (DASS-21)	poverty	linear regression	other								y	Results for exposure to oil spill not reported, rather other socio demographic and economic factors
dzhambov2017	Quantiative	students age 15-25	399	convenience (students)	recruited from 2 highschools & 3 universities	n	Bulgaria	mh	n	y	n	n	cross sectional	measured noise exposure	road traffic derived from noise map	self report	mental health (General Health questionnaire [GHQ]) - highser score = worse mental health	Mediators: noise annoyance, social cohesion, physical activity, restorativeness of environment; Confounders: age, sex, ethnicity, noise sensitivity, orientation of rooms in home, duration of residence, average time spent at home per day; socioeconomic status; Area level: PM2.5 at residence, population density, surrounding vetation using NDVI	linear regression	positive	indirect effect	higher noise exposure indirectly associated with worse mental health through noise annoyance, social cohesion and physical activity pathways	use of statistical methods to account for both serial and parallel mediation components		diagnosis rather than self-report	sleep disturbance as a potential mediator between noise exposure and mental health	empirical	n
dzhambov2017	Quantiative	students age 15-25	399	convenience (students)	recruited from 2 highschools & 3 universities	n	Bulgaria	mh	n	y	n	n	cross sectional	measured noise exposure	road traffic derived from noise map	self report	mental health (General Health questionnaire [GHQ]) - highser score = worse mental health	Mediators: noise annoyance, social cohesion, physical activity, restorativeness of environment; Confounders: age, sex, ethnicity, noise sensitivity, orientation of rooms in home, duration of residence, average time spent at home per day; socioeconomic status; Area level: PM2.5 at residence, population density, surrounding vetation using NDVI	Structural Equation Modelling	positive	indirect effect	more noise annoyance associated with less cohesion and in turn with worse mental health	use of statistical methods to account for both serial and parallel mediation components	multi-faceted psychometric instrument to measure noise annoyance	diagnosis rather than self-report	sleep disturbance as a potential mediator between noise exposure and mental health	empirical	n
dzhambov2018b	Quantiative	Students 18-35 years in one university in Bulgaria	720	convenience (students)		n	Plovdiv, Bulgaria	both	n	y	y	y	cross sectional survey data linked to objective environmental data	Land use regression model using GIS data used to estimate residential noise at address	Day equivalent noise level LAeq	Questionnaire	General mental health score - using GHQ short 11 item version (GHQ12 minus sleep disturbance item). Higher score = worse mental health (/more mental distress)	Potential mediators examined: annoyance fro menvironmental pollution, sleep distrubance, restorative quality of the neighbourhood, neighbourhood social cohesion, commuting/leisure time physical activity. Confounders controlled: age, sex, ethnicity, duration of residence, average time spent at home/day, month of data collection, economic status, urbanicity	Structural Equation Modelling	other	SEM model too complex to summarise as +/- effect	Results indicated an indirect relationship between noise level and GHQ, mediated through 2 pathways (1: Laeq>annoyance>restorative quality>physical activity; 2: Laeq>annoyance>sleep disturbance					theoretical	n
dzhambov2018b	Quantiative	Students 18-35 years in one university in Bulgaria	720	convenience (students)		n	Plovdiv, Bulgaria	both	n	y	y	y	cross sectional survey data linked to objective environmental data	Land use regression model (using data from air quality monitoring stations, satellite-based No2 and other geographic variables related to air pollution) used to estimate air pollution at address	Air pollution NO2	Questionnaire	General mental health score - using GHQ short 11 item version (GHQ12 minus sleep disturbance item). Higher score = worse mental health (/more mental distress)	Potential mediators examined: annoyance fro menvironmental pollution, sleep distrubance, restorative quality of the neighbourhood, neighbourhood social cohesion, commuting/leisure time physical activity. Confounders controlled: age, sex, ethnicity, duration of residence, average time spent at home/day, month of data collection, economic status, urbanicity	Structural Equation Modelling	other	SEM model too complex to summarise as +/- effect	Results indicated an indirect reationship between NO2 and GHQ via a mediation pathway of NO2>annoyance>restorative quality>physical activity					theoretical	n
dzhambov2018c	Quantiative	Students 15-25 of Plovdiv, Bulgaria	399	Other	Unclear	n	Plovdiv, Bulgaria	mh	n	y	n	n	n	Use of existing Noise Map 50dB to 80dB	Road traffic noise	survey	General mental health (GHQ, higher=worse)	sex, age, ethnicity, noise sensitivity, socioeconomic status, educational institution, month of data collection, air pollution, presense of water bodies, time speat at home/day, duration of residence, population density	least squares linear regression	positive		Noiser neighbourhoods have poorer mental health, but interacts with tree cover. If tree cover over 5.84% noise no longer impacts. If greenspace close to home noise no longer impacts	Deep learning algorithums to assess noise at a 3 dimensional scale, accounting for vegetation	Include combined audio visual experiences of noise, positive as well as negative	Include noise perception		empirical	n
dzhambov2018c	Quantiative	Students 15-25 of Plovdiv, Bulgaria	400	Other	Unclear	n	Plovdiv, Bulgaria	mh	n	y	n	n	n	Satellite images	NDVI	survey	General mental health (GHQ, higher=worse)	sex, age, ethnicity, noise sensitivity, socioeconomic status, educational institution, month of data collection, air pollution, presense of water bodies, time speat at home/day, duration of residence, population density	least squares linear regression	negative		Higher NDVI better mental health.					empirical	n
dzhambov2018c	Quantiative	Students 15-25 of Plovdiv, Bulgaria	401	Other	Unclear	n	Plovdiv, Bulgaria	mh	n	y	n	n	n	Satellite images	Tree cover density	survey	General mental health (GHQ, higher=worse)	sex, age, ethnicity, noise sensitivity, socioeconomic status, educational institution, month of data collection, air pollution, presense of water bodies, time speat at home/day, duration of residence, population density	least squares linear regression	negative		closer greenspace better mental health. In areas with close greenspace noise no longer impacts mental health					empirical	n
dzhambov2018c	Quantiative	Students 15-25 of Plovdiv, Bulgaria	402	Other	Unclear	n	Plovdiv, Bulgaria	mh	n	y	n	n	n	Open greenspace map	Distance to nearest greenspace	survey	General mental health (GHQ, higher=worse)	sex, age, ethnicity, noise sensitivity, socioeconomic status, educational institution, month of data collection, air pollution, presense of water bodies, time speat at home/day, duration of residence, population density	least squares linear regression	negative		Higher tree density better mental health. When above 5.84% tree density reduced the impact of noise on mental health					empirical	n
dzhambov2018d	Quantiative	students	109	convenience (students)		n	Poland	both	n	y	n	n	begin/end of school year data points	exposure - residential greenspace	NDVI at 100m around the residence	self report	anxiety/depression (GHQ-12) - high score = poorer mental health	Mediators: residential noise, air pollution, environmental annoyance, perceived restorative quality, neighbourhood social cohesion, physical activity, sleep disturbance; Confounders: age, gender, ethnicity, duration of residence, average time spent at home per day, perceived economic status	cross-sectional single mediation model	negative		increased greenspace within 100m indirectly associated with lower anxiety through higher restorative quality and physical activity	account for potential reciprocal relationship between green/blue space and mental health	seasonal effect of vegetation; capturing exposure to vegetation in places other than residence	not discussed	replicate with other populations; longitudinal modelling with relevant mediators; assess appropriate follow-up time for effect (e.g. 1 week, 1 month, 3 month)	empirical	n
dzhambov2018d	Quantiative	students	109	convenience (students)		n	Poland	both	n	y	n	n	begin/end of school year data points	exposure - residential bluespace	presence of blue space in 100m buffer (data drawn from Urban Atlans 2012)	self report	anxiety/depression (GHQ-12) - high score = poorer mental health	Mediators: residential noise, air pollution, environmental annoyance, perceived restorative quality, neighbourhood social cohesion, physical activity, sleep disturbance; Confounders: age, gender, ethnicity, duration of residence, average time spent at home per day, perceived economic status	cross-sectional single mediation model	other		no bluespace within 100m thus no result for this buffer area	account for potential reciprocal relationship between green/blue space and mental health	capturing exposure to bluespace in places other than residence	not discussed	replicate with other populations; longitudinal modelling with relevant mediators; assess appropriate follow-up time for effect (e.g. 1 week, 1 month, 3 month)	empirical	n
dzhambov2018d	Quantiative	students	109	convenience (students)		n	Poland	both	n	y	n	n	begin/end of school year data points	modelled residential noise	diurnal average noise level	self report	anxiety/depression (GHQ-12) - high score = poorer mental health	This is one of the mediator variables pulled out because it is an environmental science type variable		null		no mediating role of noise level on association between greenspace within 100m and anxiety	account for potential reciprocal relationship between green/blue space and mental health	not discussed	not discussed	replicate with other populations; longitudinal modelling with relevant mediators; assess appropriate follow-up time for effect (e.g. 1 week, 1 month, 3 month)	empirical	n
dzhambov2018d	Quantiative	students	109	convenience (students)		n	Poland	both	n	y	n	n	begin/end of school year data points	modelled residential air pollution	nitrogen dioxide	self report	anxiety/depression (GHQ-12) - high score = poorer mental health	This is one of the mediator variables pulled out because it is an environmental science type variable		null		no mediating role of air pollution on association between greenspace within 100m and anxiety	account for potential reciprocal relationship between green/blue space and mental health	not discussed	not discussed	replicate with other populations; longitudinal modelling with relevant mediators; assess appropriate follow-up time for effect (e.g. 1 week, 1 month, 3 month)	empirical	n
dzhambov2018d	Quantiative	students	109	convenience (students)		n	Poland	both	n	y	n	n	begin/end of school year data points	self-report	perceived environmental annoyance (traffic, neighbours, air pollution, vibration)	self report	anxiety/depression (GHQ-12) - high score = poorer mental health	This is one of the mediator variables pulled out because it is an environmental science type variable		null		no mediating role of environmental annoyance on association between greenspace within 100m and anxiety	account for potential reciprocal relationship between green/blue space and mental health	not discussed	not discussed	replicate with other populations; longitudinal modelling with relevant mediators; assess appropriate follow-up time for effect (e.g. 1 week, 1 month, 3 month)	empirical	n
dzhambov2018d	Quantiative	students	109	convenience (students)		n	Poland	both	n	y	n	n	begin/end of school year data points	exposure - residential greenspace	NDVI at 300m around the residence	self report	anxiety/depression (GHQ-12) - high score = poorer mental health	Mediators: residential noise, air pollution, environmental annoyance, perceived restorative quality, neighbourhood social cohesion, physical activity, sleep disturbance; Confounders: age, gender, ethnicity, duration of residence, average time spent at home per day, perceived economic status	cross-sectional single mediation model	negative		increased greenspace within 300m indirectly associated with lower anxiety through higher restorative quality and physical activity	account for potential reciprocal relationship between green/blue space and mental health	seasonal effect of vegetation; capturing exposure to vegetation in places other than residence	not discussed	replicate with other populations; longitudinal modelling with relevant mediators; assess appropriate follow-up time for effect (e.g. 1 week, 1 month, 3 month)	empirical	n
dzhambov2018d	Quantiative	students	109	convenience (students)		n	Poland	both	n	y	n	n	begin/end of school year data points	exposure - residential bluespace	presence of blue space in 300 m buffer (data drawn from Urban Atlans 2012)	self report	anxiety/depression (GHQ-12) - high score = poorer mental health	Mediators: residential noise, air pollution, environmental annoyance, perceived restorative quality, neighbourhood social cohesion, physical activity, sleep disturbance; Confounders: age, gender, ethnicity, duration of residence, average time spent at home per day, perceived economic status	cross-sectional single mediation model	negative		increased bluespace within 300m indirectly associated with lower anxiety through higher restorative quality and physical activity	account for potential reciprocal relationship between green/blue space and mental health	capturing exposure to bluespace in places other than residence	not discussed	replicate with other populations; longitudinal modelling with relevant mediators; assess appropriate follow-up time for effect (e.g. 1 week, 1 month, 3 month)	empirical	n
dzhambov2018d	Quantiative	students	109	convenience (students)		n	Poland	both	n	y	n	n	begin/end of school year data points	modelled residential noise	diurnal average noise level	self report	anxiety/depression (GHQ-12) - high score = poorer mental health	This is one of the mediator variables pulled out because it is an environmental science type variable		null		no mediating role of noise level on association between greenspace or bluespace within 300m and anxiety	account for potential reciprocal relationship between green/blue space and mental health	not discussed	not discussed	replicate with other populations; longitudinal modelling with relevant mediators; assess appropriate follow-up time for effect (e.g. 1 week, 1 month, 3 month)	empirical	n
dzhambov2018d	Quantiative	students	109	convenience (students)		n	Poland	both	n	y	n	n	begin/end of school year data points	modelled residential air pollution	nitrogen dioxide	self report	anxiety/depression (GHQ-12) - high score = poorer mental health	This is one of the mediator variables pulled out because it is an environmental science type variable		null		no mediating role of air pollution on association between greenspace or bluespace within 300m and anxiety	account for potential reciprocal relationship between green/blue space and mental health	not discussed	not discussed	replicate with other populations; longitudinal modelling with relevant mediators; assess appropriate follow-up time for effect (e.g. 1 week, 1 month, 3 month)	empirical	n
dzhambov2018d	Quantiative	students	109	convenience (students)		n	Poland	both	n	y	n	n	begin/end of school year data points	self-report	perceived environmental annoyance (traffic, neighbours, air pollution, vibration)	self report	anxiety/depression (GHQ-12) - high score = poorer mental health	This is one of the mediator variables pulled out because it is an environmental science type variable		null		no mediating role of environmental annoyance on association between greenspace or bluespace within 300m and anxiety	account for potential reciprocal relationship between green/blue space and mental health	not discussed	not discussed	replicate with other populations; longitudinal modelling with relevant mediators; assess appropriate follow-up time for effect (e.g. 1 week, 1 month, 3 month)	empirical	n
dzhambov2018d	Quantiative	students	109	convenience (students)		n	Poland	both	n	y	n	n	begin/end of school year data points	exposure - residential greenspace	NDVI at 500m around the residence	self report	anxiety/depression (GHQ-12) - high score = poorer mental health	Mediators: residential noise, air pollution, environmental annoyance, perceived restorative quality, neighbourhood social cohesion, physical activity, sleep disturbance; Confounders: age, gender, ethnicity, duration of residence, average time spent at home per day, perceived economic status	cross-sectional single mediation model	negative		increased greenspace within 500m indirectly associated with lower anxiety through higher restorative quality	account for potential reciprocal relationship between green/blue space and mental health	seasonal effect of vegetation; capturing exposure to vegetation in places other than residence	not discussed	replicate with other populations; longitudinal modelling with relevant mediators; assess appropriate follow-up time for effect (e.g. 1 week, 1 month, 3 month)	empirical	n
dzhambov2018d	Quantiative	students	109	convenience (students)		n	Poland	both	n	y	n	n	begin/end of school year data points	exposure - residential bluespace	presence of blue space in 500 m buffer (data drawn from Urban Atlans 2012)	self report	anxiety/depression (GHQ-12) - high score = poorer mental health	Mediators: residential noise, air pollution, environmental annoyance, perceived restorative quality, neighbourhood social cohesion, physical activity, sleep disturbance; Confounders: age, gender, ethnicity, duration of residence, average time spent at home per day, perceived economic status	cross-sectional single mediation model	negative		increased bluespace within 500m indirectly associated with lower anxiety through higher restorative quality	account for potential reciprocal relationship between green/blue space and mental health	capturing exposure to bluespace in places other than residence	not discussed	replicate with other populations; longitudinal modelling with relevant mediators; assess appropriate follow-up time for effect (e.g. 1 week, 1 month, 3 month)	empirical	n
dzhambov2018d	Quantiative	students	109	convenience (students)		n	Poland	both	n	y	n	n	begin/end of school year data points	modelled residential noise	diurnal average noise level	self report	anxiety/depression (GHQ-12) - high score = poorer mental health	This is one of the mediator variables pulled out because it is an environmental science type variable		null		no mediating role of noise level on association between greenspace or bluespace within 500m and anxiety	account for potential reciprocal relationship between green/blue space and mental health	not discussed	not discussed	replicate with other populations; longitudinal modelling with relevant mediators; assess appropriate follow-up time for effect (e.g. 1 week, 1 month, 3 month)	empirical	n
dzhambov2018d	Quantiative	students	109	convenience (students)		n	Poland	both	n	y	n	n	begin/end of school year data points	modelled residential air pollution	nitrogen dioxide	self report	anxiety/depression (GHQ-12) - high score = poorer mental health	This is one of the mediator variables pulled out because it is an environmental science type variable		null		no mediating role of air pollution on association between greenspace or bluespace within 500m and anxiety	account for potential reciprocal relationship between green/blue space and mental health	not discussed	not discussed	replicate with other populations; longitudinal modelling with relevant mediators; assess appropriate follow-up time for effect (e.g. 1 week, 1 month, 3 month)	empirical	n
dzhambov2018d	Quantiative	students	109	convenience (students)		n	Poland	both	n	y	n	n	begin/end of school year data points	self-report	perceived environmental annoyance (traffic, neighbours, air pollution, vibration)	self report	anxiety/depression (GHQ-12) - high score = poorer mental health	This is one of the mediator variables pulled out because it is an environmental science type variable		null		no mediating role of environmental annoyance on association between greenspace or bluespace within 500m and anxiety	account for potential reciprocal relationship between green/blue space and mental health	not discussed	not discussed	replicate with other populations; longitudinal modelling with relevant mediators; assess appropriate follow-up time for effect (e.g. 1 week, 1 month, 3 month)	empirical	n
dzhambov2018d	Quantiative	students	109	convenience (students)		n	Poland	both	n	y	n	n	begin/end of school year data points	exposure - residential greenspace	NDVI at 100m around the residence	self report	anxiety/depression (GHQ-12) - high score = poorer mental health	Mediators: residential noise, air pollution, environmental annoyance, perceived restorative quality, neighbourhood social cohesion, physical activity, sleep disturbance; Confounders: age, gender, ethnicity, duration of residence, average time spent at home per day, perceived economic status; Baseline scores for GHQ-12 & mediators	cross lagged panel mediation (to assess longitudinal effect)	negative		increased greenspace within 100m associated directly with lower anxiety i.e. no evidence of mediation	account for potential reciprocal relationship between green/blue space and mental health	seasonal effect of vegetation; capturing exposure to vegetation in places other than residence	not discussed	replicate with other populations; longitudinal modelling with relevant mediators; assess appropriate follow-up time for effect (e.g. 1 week, 1 month, 3 month)	empirical	n
dzhambov2018d	Quantiative	students	109	convenience (students)		n	Poland	both	n	y	n	n	begin/end of school year data points	exposure - residential bluespace	presence of blue space in 100m buffer (data drawn from Urban Atlans 2012)	self report	anxiety/depression (GHQ-12) - high score = poorer mental health	Mediators: residential noise, air pollution, environmental annoyance, perceived restorative quality, neighbourhood social cohesion, physical activity, sleep disturbance; Confounders: age, gender, ethnicity, duration of residence, average time spent at home per day, perceived economic status; Baseline scores for GHQ-12 & mediators	cross lagged panel mediation (to assess longitudinal effect)	other		no bluespace within 100m thus no result for this buffer area	account for potential reciprocal relationship between green/blue space and mental health	capturing exposure to bluespace in places other than residence	not discussed	replicate with other populations; longitudinal modelling with relevant mediators; assess appropriate follow-up time for effect (e.g. 1 week, 1 month, 3 month)	empirical	n
dzhambov2018d	Quantiative	students	109	convenience (students)		n	Poland	both	n	y	n	n	begin/end of school year data points	exposure - residential greenspace	NDVI at 300m around the residence	self report	anxiety/depression (GHQ-12) - high score = poorer mental health	Mediators: residential noise, air pollution, environmental annoyance, perceived restorative quality, neighbourhood social cohesion, physical activity, sleep disturbance; Confounders: age, gender, ethnicity, duration of residence, average time spent at home per day, perceived economic status; Baseline scores for GHQ-12 & mediators		negative		increased greenspace within 300m associated directly with lower anxiety i.e. no evidence of mediation	account for potential reciprocal relationship between green/blue space and mental health	seasonal effect of vegetation; capturing exposure to vegetation in places other than residence	not discussed	replicate with other populations; longitudinal modelling with relevant mediators; assess appropriate follow-up time for effect (e.g. 1 week, 1 month, 3 month)	empirical	n
dzhambov2018d	Quantiative	students	109	convenience (students)		n	Poland	both	n	y	n	n	begin/end of school year data points	exposure - residential bluespace	presence of blue space in 300 m buffer (data drawn from Urban Atlans 2012)	self report	anxiety/depression (GHQ-12) - high score = poorer mental health	Mediators: residential noise, air pollution, environmental annoyance, perceived restorative quality, neighbourhood social cohesion, physical activity, sleep disturbance; Confounders: age, gender, ethnicity, duration of residence, average time spent at home per day, perceived economic status; Baseline scores for GHQ-12 & mediators		null		no association between increased blue space within 300m and anxiety levels over time	account for potential reciprocal relationship between green/blue space and mental health	capturing exposure to bluespace in places other than residence	not discussed	replicate with other populations; longitudinal modelling with relevant mediators; assess appropriate follow-up time for effect (e.g. 1 week, 1 month, 3 month)	empirical	n
dzhambov2018d	Quantiative	students	109	convenience (students)		n	Poland	both	n	y	n	n	begin/end of school year data points	exposure - residential greenspace	NDVI at 500m around the residence	self report	anxiety/depression (GHQ-12) - high score = poorer mental health	Mediators: residential noise, air pollution, environmental annoyance, perceived restorative quality, neighbourhood social cohesion, physical activity, sleep disturbance; Confounders: age, gender, ethnicity, duration of residence, average time spent at home per day, perceived economic status; Baseline scores for GHQ-12 & mediators		negative		increased greenspace within 500m associated directly with lower anxiety i.e. no evidence of mediation	account for potential reciprocal relationship between green/blue space and mental health	seasonal effect of vegetation; capturing exposure to vegetation in places other than residence	not discussed	replicate with other populations; longitudinal modelling with relevant mediators; assess appropriate follow-up time for effect (e.g. 1 week, 1 month, 3 month)	empirical	n
dzhambov2018d	Quantiative	students	109	convenience (students)		n	Poland	both	n	y	n	n	begin/end of school year data points	exposure - residential bluespace	presence of blue space in 500 m buffer (data drawn from Urban Atlans 2012)	self report	anxiety/depression (GHQ-12) - high score = poorer mental health	Mediators: residential noise, air pollution, environmental annoyance, perceived restorative quality, neighbourhood social cohesion, physical activity, sleep disturbance; Confounders: age, gender, ethnicity, duration of residence, average time spent at home per day, perceived economic status; Baseline scores for GHQ-12 & mediators		null		no association between increased blue space within 500m and anxiety levels over time	account for potential reciprocal relationship between green/blue space and mental health	capturing exposure to bluespace in places other than residence	not discussed	replicate with other populations; longitudinal modelling with relevant mediators; assess appropriate follow-up time for effect (e.g. 1 week, 1 month, 3 month)	empirical	n
eisenman2015	quantitative	416	1109	other	census	n	Arizona, United States	m/h	n	y	n	n	n	presence of wildfires	solastalgia measures (seeing the fire has been stressful, I have gone to the area affected by the fire less than I did before, I feel like I have been grieving for the loss of the forest, I feel sad when I look at landscapes damaged by the fire, I feel that apsects of living near the forest that I value were lost, unique aspects of nature that I value were lost.)	poor mental health	Kessler Psychological distress scale (KC-10)	education levels, fulltime residency, defending home from fire, negative financial impacts	principle components factor analysis	postiive		The presence of wildfires in the area were found to be significantly associated with solastalgia	replicated study elsewhere using the 6 point solastalgia measure	further examination of the concept of solastalgia	further examination of the concept of solastalgia	further examination of the concept of solastalgia, replicated study elsewhere using the 6 point solastalgia measure	empirical	n
espinel2019																												y	Opinion paper
eze2020	Quantiative	Swiss adults	4581	Other	Initial study random, this study sample to have no depression and data on noise	n	Switzerland	both	n	y	n	n	n	Modelled from road network, traffic stats, spped limit, bridges, noise barriers, aircraft noise, railway tracks	Road traffic noise, Lden	survey - reported diagnoses or score on mental health domain questionnaire	Depression	noise annoyance, age, sex, education, study area, neighbourhood socioeconomics, smoking, alcohol consumption, fruit and veg intake, family history of depression, residential greenness, air pollution, physical activity, BMI, chronic disease, daytime sleepiness	poisson regression model, generalised structural equation model	positive		Increase noise by 10dB more likely depressed. When split by noise type only held for road and aircraft, not railway. Maintained regardelss of confounders. Stronger effect for those with low physical acitivity					empirical	n
eze2020	Quantiative	Swiss adults	4581	Other	Initial study random, this study sample to have no depression and data on noise	n	Switzerland	both	n	y	n	n	n	Modelled from road network, traffic stats, spped limit, bridges, noise barriers, aircraft noise, railway tracks	Road traffic noise exposure level	survey - reported diagnoses or score on mental health domain questionnaire	Depression	noise annoyance, age, sex, education, study area, neighbourhood socioeconomics, smoking, alcohol consumption, fruit and veg intake, family history of depression, residential greenness, air pollution, physical activity, BMI, chronic disease, daytime sleepiness	poisson regression model, generalised structural equation model	positive		Increased noise sources more likely to be depressed. Stronger effect for those with low physical activity					empirical	n
felix2015	Quantiative	residents in 3 affected cities exposed to multiple fires in 1 year	402	random	random digit dial	n	USA - California; 3 cities affected by 3 fires in one yaer	mh	n	y	n	n	cross sectional	multiple natural disaster - 3 wildfires	number of evacuations experienced	questionnaire	MH - at time of fire (Mental Health Inventory - MHI)		analysis of variance	negative		if evacuated at all this increased, MH decreased at time of fire	not discussed	not discussed	pre-disaster MH data missing; future studies should screen for mental health not just psychopathology (e.g. depression, PTSD)	longitudinal impact on MH	empirical	n		Note: gender diff also found; women more negative MH than men
felix2015	Quantiative	residents in 3 affected cities exposed to multiple fires in 1 year	402	random	random digit dial	n	USA - California; 3 cities affected by 3 fires in one yaer	mh	n	y	n	n	cross sectional	multiple natural disaster - 3 wildfires	number of evacuations experienced	questionnaire	Current MH - over past month		analysis of variance	null		no association between being evacuated and current MH levels	not discussed	not discussed	pre-disaster MH data missing; future studies should screen for mental health not just psychopathology (e.g. depression, PTSD)	longitudinal impact on MH	empirical	n
felix2015	Quantiative	residents in 3 affected cities exposed to multiple fires in 1 year	402	random	random digit dial	n	USA - California; 3 cities affected by 3 fires in one yaer	mh	n	y	n	n	cross sectional	multiple natural disaster - 3 wildfires	subjective exposure assessment - perception of fire stress	questionnaire	MH - at time of fire (MHI)	perceived social support (Oslos Social Support Scale)	hierarchical regression analysis	negative	all participants together	increased fire stress decreased mental health at time of fire; no moderating effect of social support	not discussed	not discussed	pre-disaster MH data missing; future studies should screen for mental health not just psychopathology (e.g. depression, PTSD)	longitudinal impact on MH	empirical	n
felix2015	Quantiative	residents not evacuated	240	Other	subsample of larger random digit dial recruited group	n	USA - California; 3 cities affected by 3 fires in one yaer	mh	n	y	n	n	cross sectional	multiple natural disaster - 3 wildfires	subjective exposure assessment - perception of fire stress	questionnaire	MH - at time of fire (MHI)	perceived social support (Oslos Social Support Scale)	hierarchical regression analysis	negative	not evacuated subsample	increased fire stress decreased mental health at time of fire; no moderating effect of social support	not discussed	not discussed	pre-disaster MH data missing; future studies should screen for mental health not just psychopathology (e.g. depression, PTSD)	longitudinal impact on MH	empirical	n
felix2015	Quantiative	residents evacuated	254	Other	subsample of larger random digit dial recruited group	n	USA - California; 3 cities affected by 3 fires in one yaer	mh	n	y	n	n	cross sectional	multiple natural disaster - 3 wildfires	subjective exposure assessment - perception of fire stress	questionnaire	MH - at time of fire (MHI)	perceived social support (Oslos Social Support Scale)	hierarchical regression analysis	negative	evacuated subsample	increased fire stress decreased mental health at time of fire; moderating effect of social support - those with perceived low social support showed lower MH as level of fire stress increased	not discussed	not discussed	pre-disaster MH data missing; future studies should screen for mental health not just psychopathology (e.g. depression, PTSD)	longitudinal impact on MH	empirical	n
felix2015	Quantiative	all participants together	402	random	random digit dial	n	USA - California; 3 cities affected by 3 fires in one yaer	mh	n	y	n	n	cross sectional	multiple natural disaster - 3 wildfires	subjective exposure assessment - perception of fire stress	questionnaire	Current MH - over past month (Mental Health Inventory)	perceived social support (Oslos Social Support Scale); life stressors since disaster		negative	all participants together	increased fire stress decreased current mental health ; no moderating effect of social support; social support moderated effect of life stressors since fire, i.e. those who had life stressors & perceived low soc support had worse MH	not discussed	not discussed	pre-disaster MH data missing; future studies should screen for mental health not just psychopathology (e.g. depression, PTSD)	longitudinal impact on MH	empirical	n
felix2015	Quantiative	residents not evacuated	240	Other	subsample of larger random digit dial recruited group	n	USA - California; 3 cities affected by 3 fires in one yaer	mh	n	y	n	n	cross sectional	multiple natural disaster - 3 wildfires	subjective exposure assessment - perception of fire stress	questionnaire	Current MH - over past month (Mental Health Inventory)	perceived social support (Oslos Social Support Scale); life stressors since disaster	hierarchical regression analysis	negative	not evacuated subsample	increased fire stress decreased current mental health; no moderating effect of social support	not discussed	not discussed	pre-disaster MH data missing; future studies should screen for mental health not just psychopathology (e.g. depression, PTSD)	longitudinal impact on MH	empirical	n
felix2015a	quantitative	402	102967	other	random digital dial telepone survey	n	California, US	m/h	n	y	n	n	n	multiple wildfire exposures	number of evacuations, perceptions of fire stress	poor mental health	Mental Health inventory (MHI-5)	sex, Olso social support scale, life stressors since the fire	anova	positive		Fire stress was significantly negatively correlated with participants retrospective assessment of mental health	longitudinal research on how disasters erode mental health, testing the stress innoculation hypothesis.	n/a	n/a	n/a	empirical	n
felix2015a	quantitative	402	102967	other	random digital dial telepone survey	n	California, US	m/h	n	y	n	n	n	multiple wildfire exposures	number of evacuations, perceptions of fire stress	poor mental health	Mental Health inventory (MHI-5)	sex, Olso social support scale, life stressors since the fire	anova	positive		Number of times a participant was evacuated was related to negative mental health at the time of the fire	longitudinal research on how disasters erode mental health, testing the stress innoculation hypothesis.	n/a	n/a	n/a	empirical	n
felix2015a	quantitative	402	102967	other	random digital dial telepone survey	n	California, US	m/h	n	y	n	n	n	multiple wildfire exposures	number of evacuations, perceptions of fire stress	poor mental health	Mental Health inventory (MHI-5)	sex, Olso social support scale, life stressors since the fire	anova	null		Number of times a participant was evacuated was not related to negative current mental health	longitudinal research on how disasters erode mental health, testing the stress innoculation hypothesis.	n/a	n/a	n/a	empirical	n
felix2015a	quantitative	402	102967	other	random digital dial telepone survey	n	California, US	m/h	n	y	n	n	n	multiple wildfire exposures	number of evacuations, perceptions of fire stress	poor mental health	Mental Health inventory (MHI-5)	sex, Olso social support scale, life stressors since the fire	hierarchical multiple regression analysis	negative		Fire stress was negatively related with mental health	longitudinal research on how disasters erode mental health, testing the stress innoculation hypothesis.	n/a	n/a	n/a	empirical	n
felix2015a	quantitative	402	102967	other	random digital dial telepone survey	n	California, US	m/h	n	y	n	n	n	multiple wildfire exposures	number of evacuations, perceptions of fire stress	poor mental health	Mental Health inventory (MHI-5)	sex, Olso social support scale, life stressors since the fire	hierarchical multiple regression analysis	negative		Fire stress without being evacauted was negatively related to mental health	longitudinal research on how disasters erode mental health, testing the stress innoculation hypothesis.	n/a	n/a	n/a	empirical	n
felix2021	Quantiative	residents evacuated	154	Other	subsample of larger random digit dial recruited group	n	USA - California; 3 cities affected by 3 fires in one yaer	mh	n	y	n	n	cross sectional	multiple natural disaster - 3 wildfires	subjective exposure assessment - perception of fire stress	questionnaire	Current MH - over past month (Mental Health Inventory)	perceived social support (Oslos Social Support Scale); life stressors since disaster		negative	evacuated subsample	increased fire stress decreased current mental health; no moderating effect of social support; social support moderated effect of life stressors since fire, i.e. those who had life stressors & perceived low soc support had worse MH	not discussed	not discussed	pre-disaster MH data missing; future studies should screen for mental health not just psychopathology (e.g. depression, PTSD)	longitudinal impact on MH	empirical	n
fennell2016	mixed	South Australian Farmers Federation	309	purposive	All members of Federation sent questionnaire	n	South Australia	m/h	n	y	n	n	n	presence of drought	farming in a drought	Stress	Ways of coping questionnaire	illness,money, demographic information, other stressors	thematic		mixed	Farm related pressures put stress on farmers were related to drought (e.g. lack of water, poor harvest, having to fetch water etc).	n/a	n/a	n/a	n/a	empirical	n
flores2020	Quantiative	Houston metropolitan area residents	403	random		y	Houston, Texas, USA	mh	n	y	n	n	No control. Disaster (hurricane Harvey is part of context of study only)	GIS - flood maps	Flood extent - Proportion of area (100m buffer around home) flooded by Hurricane Harvey	questionnaire	Post-Traumatic Stress Disorder Checklist-S (PCL-S). Threshold applied to indicate high vs low PTS.	age, sex, race, nativity, household income, needed assistance to evacuate because of disablity, evacuated from home, job loss in household post-Harvey, unmet needs scale, personal event experiences, personal exposures, level of home damage, mold, helped clean up, received social support	Logistic regression	null		No effect of flood extent on PTSD. PTSD sig associated with age, race, job loss, adverse event experiences and mold.	Strengthen causal inferences by using pre-and postevent designs and/or control groups				empirical	n
forns2012	Quantiative	Children up to 2	1391	convenience (non-students)	Mother recruited	n	Spain		n	y	n	n	n	Blood tests 7th and 26th week of pregnancy	Poly-cholorinated biphenols	Survey and motor development	Bayley Scale of Infant Development - mental scores	parental education, social class, use of gas ooking, country of birth, age, parity, maternal alcohol intake, marital status.	multiple regression	null						Older children	empirical	n
forns2012	Quantiative	Children up to 3	1392	convenience (non-students)	Mother recruited	n	Spain		n	y	n	n	n	Blood tests 7th and 26th week of pregnancy	Poly-cholorinated biphenols		Bayley Scale of Infant Development - motor development		multiple regression	negative		Decrease in motor skills with 10 fold increased in PCBs				Older children	empirical	n
forns2012	Quantiative	Children up to 4	1393	convenience (non-students)	Mother recruited	n	Spain		n	y	n	n	n	Blood tests 7th and 26th week of pregnancy	dichlorodiphenyl dichloroethylene		Bayley Scale of Infant Development - motor development		multiple regression	null						Older children	empirical	n
forns2012	Quantiative	Children up to 5	1394	convenience (non-students)	Mother recruited	n	Spain		n	y	n	n	n	Blood tests 7th and 26th week of pregnancy	hexachlorobenzene		Bayley Scale of Infant Development - motor development		multiple regression	null						Older children	empirical	n
friel2014	Quantiative	individuals who had not moved location during 2001-2007 thus exposed to drought and for whom data had been provdied in Waves 1-7 of national survey	5012	Other	subsample drawn from Wave 7 of nationally representative annual panel survey (Household, Income and Labour Dynamics in Australia)	n	Australia	both	n	n	y	y	cross sectional data linkage b/w individual and rainfall data	annual rainfall data from 2001-2008 & Hutchinson Drought Index for Australia	drought exposure - 5 category (zero-to-moderate, very dry, recent long period, constant drought, constant drought with a recent long period)	survey - interviewer administered & self-complete	general psychological distress (Kessler 10-item measur [K10]) - high value = greater distress	Modifier: Rural/Urban; Demographcis: sex, age, relationship status, Aborginal/Torres Strait Islander status; Socio-economi: education, employment, household income); Health Behaviours (tobacco/alcohol use, physical activity levels)	F-test comparison	positive		drought related to increased psych distress for rural dwellers exposed to 'constant and long dry' drought	not discussed	not discussed	not discussed	not discussed	empirical	n
friel2014	Quantiative	individuals who had not moved location during 2001-2007 thus exposed to drought and for whom data had been provdied in Waves 1-7 of national survey	5012	Other	subsample drawn from Wave 7 of nationally representative annual panel survey (Household, Income and Labour Dynamics in Australia)	n	Australia	both	n	n	y	y	cross sectional data linkage b/w individual and rainfall data	annual rainfall data from 2001-2008 & Hutchinson Drought Index for Australia	drought exposure - 5 category (zero-to-moderate, very dry, recent long period, constant drought, constant drought with a recent long period)	survey - interviewer administered & self-complete	food insecurity (go without meal due to money shortage; lower-than-average regular consumption of core foods; higher-than-average consumption of discretionary (foods igh in fats, salt, simple sugars)	Modifier: Rural/Urban; Demographcis: sex, age, relationship status, Aborginal/Torres Strait Islander status; Socio-economi: education, employment, household income); Health Behaviours (tobacco/alcohol use, physical activity levels)	regression - maximum likelihood	positive		exposure to drought moderates the association between measures of food insecuirty and psych distress, geneally increasing the distress level	not discussed	not discussed	not discussed	not discussed	empirical	n
Furuyashiki2019	quantitative	219	155		convenience (non students)	n	Hiroshima Perfecture, Japan	m/h	n	y	n	n	n	participation in forest bathing	having forest bathed between health measurement	poor mental health	POMS (profile of mood scale), depressive tendencies (measured by Psychological distress scale (K6), SF-8, profile of mood scale)	physical comparison summary, systolic bood pressure, diastolic blood pressure, pulse rate, autnomous nervous activities, circulatory function)	bivariate, correlation, regression	positive		Forest bathing improved mood		future studies should validate forest bathing for working age people with depressive tendencies	future studies should validate forest bathing for working age people with depressive tendencies	future studies should validate forest bathing for working age people with depressive tendencies	empirical	n
Furuyashiki2019	quantitative	219	155		convenience (non students)	n	Hiroshima Perfecture, Japan	m/h	n	y	n	n	n	participation in forest bathing	having forest bathed between health measurement	poor mental health	POMS (profile of mood scale), depressive tendencies (measured by Psychological distress scale (K6), SF-8, profile of mood scale)	physical comparison summary, systolic bood pressure, diastolic blood pressure, pulse rate, autnomous nervous activities, circulatory function)	bivariate, correlation, regression	positive		Forest bathing improved moods for both depressive and non-depressive groups but the changes in the depressive tendencies groups were significantly larger		future studies should validate forest bathing for working age people with depressive tendencies	future studies should validate forest bathing for working age people with depressive tendencies	future studies should validate forest bathing for working age people with depressive tendencies	empirical	n
garrett2019	Quantiative	Adults living in urban areas in England	25963	Other	Sampling strategy not reported (secondary data)	y	England	both	n	n	n	y	data linkage - secondary analysis of cross sectional survey data, with spatial data	Spatial data/GIS	Coastal proximity 0-1 km (distance from area unit centroid to coast) (vs ref category of >50 km)	Questionnaire	High risk of common mental health disorders - GHQ12 (General Health questionnaire) with cutoff applied	Area level controls: deprivation, greenspace and freshwater coverage. Household/indiv level controls: household income, household deprivation, car access.	GLM	negative		Those living the closest to the coast were less likely than those living >50 km away to report GHQ scores indicating high risk of common mental health disorder. Stratifying the model by income quintile found that only in the lowest income quintile was this effect observed.					empirical	n
garrett2019	Quantiative	Adults living in urban areas in England	25963	Other	Sampling strategy not reported (secondary data)	y	England	both	n	n	n	y	data linkage - secondary analysis of cross sectional survey data, with spatial data	Spatial data/GIS	Coastal proximity 1-5 km (distance from area unit centroid to coast) (vs ref category of >50 km)	Questionnaire	High risk of common mental health disorders - GHQ12 (General Health questionnaire) with cutoff applied	Area level controls: deprivation, greenspace and freshwater coverage. Household/indiv level controls: household income, household deprivation, car access.	GLM	other		No significant effect in the main model however when model stratified by income quintiles, those in the lowest income quintile were significantly less likely to report high risk of common mental health disorder	Future work should examine potential mediators of link between coastal proximity and mental health. More longitudinal and experimental work also needed to examine causality.	Measure does not capture variations in accessibility and quality which can relate to visit frequency and mental health benefits.			empirical	n
garrett2019	Quantiative	Adults living in urban areas in England	25963	Other	Sampling strategy not reported (secondary data)	y	England	both	n	n	n	y	data linkage - secondary analysis of cross sectional survey data, with spatial data	Spatial data/GIS	Coastal proximity 5-20 km (distance from area unit centroid to coast) (vs ref category of >50 km)	Questionnaire	High risk of common mental health disorders - GHQ12 (General Health questionnaire) with cutoff applied	Area level controls: deprivation, greenspace and freshwater coverage. Household/indiv level controls: household income, household deprivation, car access.	GLM	null		No significant effect	Future work should examine potential mediators of link between coastal proximity and mental health	Measure does not capture variations in accessibility and quality which can relate to visit frequency and mental health benefits.			empirical	n
garrett2019	Quantiative	Adults living in urban areas in England	25963	Other	Sampling strategy not reported (secondary data)	y	England	both	n	n	n	y	data linkage - secondary analysis of cross sectional survey data, with spatial data	Spatial data/GIS	Coastal proximity 20- 50 km (distance from area unit centroid to coast) (vs ref category of >50 km)	Questionnaire	High risk of common mental health disorders - GHQ12 (General Health questionnaire) with cutoff applied	Area level controls: deprivation, greenspace and freshwater coverage. Household/indiv level controls: household income, household deprivation, car access.	GLM	null		No significant effect	Future work should examine potential mediators of link between coastal proximity and mental health	Measure does not capture variations in accessibility and quality which can relate to visit frequency and mental health benefits.			empirical	n
garrett2019	Quantiative	Adults living in urban areas in England	28723	Other	Sampling strategy not reported (secondary data)	y	England	both	n	n	n	y	data linkage - secondary analysis of cross sectional survey data, with spatial data	Spatial data/GIS	Coastal proximity 0-1 km (distance from area unit centroid to coast) (vs ref category of >50 km)	Questionnaire	At least moderately anxious/depressed - Health related quality of life scale (EQ5D), anxiety and depression subscale only, with cutoff	Area level controls: deprivation, greenspace and freshwater coverage. Household/indiv level controls: household income, household deprivation, car access.	GLM	other	see results summary	No significant effect in the main model however when model stratified by income quintiles, those in the lowest income quintile were significantly less likely to report at least moderately anxious or depressed	Future work should examine potential mediators of link between coastal proximity and mental health	Measure does not capture variations in accessibility and quality which can relate to visit frequency and mental health benefits.			empirical	n
garrett2019	Quantiative	Adults living in urban areas in England	28723	Other	Sampling strategy not reported (secondary data)	y	England	both	n	n	n	y	data linkage - secondary analysis of cross sectional survey data, with spatial data	Spatial data/GIS	Coastal proximity 1-5 km (distance from area unit centroid to coast) (vs ref category of >50 km)	Questionnaire	At least moderately anxious/depressed - Health related quality of life scale (EQ5D), anxiety and depression subscale only, with cutoff	Area level controls: deprivation, greenspace and freshwater coverage. Household/indiv level controls: household income, household deprivation, car access.	GLM	other	see results summary	No significant effect in the main model however when model stratified by income quintiles, those in the lowest income quintile were significantly less likely to report at least moderately anxious or depressed	Future work should examine potential mediators of link between coastal proximity and mental health	Measure does not capture variations in accessibility and quality which can relate to visit frequency and mental health benefits.			empirical	n
garrett2019	Quantiative	Adults living in urban areas in England	28723	Other	Sampling strategy not reported (secondary data)	y	England	both	n	n	n	y	data linkage - secondary analysis of cross sectional survey data, with spatial data	Spatial data/GIS	Coastal proximity 5-20 km (distance from area unit centroid to coast) (vs ref category of >50 km)	Questionnaire	At least moderately anxious/depressed - Health related quality of life scale (EQ5D), anxiety and depression subscale only, with cutoff	Area level controls: deprivation, greenspace and freshwater coverage. Household/indiv level controls: household income, household deprivation, car access.	GLM	null		No significant effect	Future work should examine potential mediators of link between coastal proximity and mental health	Measure does not capture variations in accessibility and quality which can relate to visit frequency and mental health benefits.			empirical	n
garrett2019	Quantiative	Adults living in urban areas in England	28723	Other	Sampling strategy not reported (secondary data)	y	England	both	n	n	n	y	data linkage - secondary analysis of cross sectional survey data, with spatial data	Spatial data/GIS	Coastal proximity 20- 50 km (distance from area unit centroid to coast) (vs ref category of >50 km)	Questionnaire	At least moderately anxious/depressed - Health related quality of life scale (EQ5D), anxiety and depression subscale only, with cutoff	Area level controls: deprivation, greenspace and freshwater coverage. Household/indiv level controls: household income, household deprivation, car access.	GLM	null		No significant effect	Future work should examine potential mediators of link between coastal proximity and mental health	Measure does not capture variations in accessibility and quality which can relate to visit frequency and mental health benefits.			empirical	n
gascon2018	Quantiative	Alzeimers families, 45-74, living in Barcelona	958	convenience (non-students)		n	Barcelona, Spain	mh	n	y	n	n	n	Landsat images	NDVI within 100m, 300m and 500m	Psychiatrist interviews	Depression or anxiety diagnoses/medication	age, gender, education, maritial status, living alone, work category, physical activity, smoking, sleep, social support, percieved social support, meditation, caregiver, familiy history of alzeimers or dementia, BMI, air pollution, noise	Logistic regression	negative		Higher greenness was related to lower depsression and anxiety, however only significant for use of benzodiazepines. Somewhat mediated by NO2, PM2.5, noise, physical acitivity and social support, but not entirely.	Longttitudianl studies needed	Include access beyond just presence			empirical	n
gascon2018	Quantiative	Alzeimers families, 45-74, living in Barcelona	958	convenience (non-students)		n	Barcelona, Spain	mh	n	y	n	n	n	Greenspace map	Ha greenspace within 100m, 300m and 500m	Psychiatrist interviews	Depression or anxiety diagnoses/medication	age, gender, education, maritial status, living alone, work category, physical activity, smoking, sleep, social support, percieved social support, meditation, caregiver, familiy history of alzeimers or dementia, BMI, air pollution, noise	Logistic regression	negative		More greenspace within 300m and 500m assoaicted with reduced anxiety and depression, but not significant. Mediated somewhat by NO2, PM2.5 and Noise.	Longttitudianl studies needed	Include access beyond just presence			empirical	n
gascon2018	Quantiative	Alzeimers families, 45-74, living in Barcelona	958	convenience (non-students)		n	Barcelona, Spain	mh	n	y	n	n	n	Greenspace map	Access to green (0.5ha within 300m)	Psychiatrist interviews	Depression or anxiety diagnoses/medication	age, gender, education, maritial status, living alone, work category, physical activity, smoking, sleep, social support, percieved social support, meditation, caregiver, familiy history of alzeimers or dementia, BMI, air pollution, noise	Logistic regression	negative		Access to greenspace reduced odds ratio of depsression or anxiety, but not significant	Longttitudianl studies needed	Include access beyond just presence			empirical	n
gascon2018	Quantiative	Alzeimers families, 45-74, living in Barcelona	958	convenience (non-students)		n	Barcelona, Spain	mh	n	y	n	n	n	Greenspace map	Access to blue (within 100m, 300m and 500m)	Psychiatrist interviews	Depression or anxiety diagnoses/medication	age, gender, education, maritial status, living alone, work category, physical activity, smoking, sleep, social support, percieved social support, meditation, caregiver, familiy history of alzeimers or dementia, BMI, air pollution, noise	Logistic regression	negative		Access to bluespace (and in combination to greenspace) reduced odds ratio of depsression or anxiety, but not significant	Longttitudianl studies needed	Include access beyond just presence			empirical	n
gaspar2015	Quantiative	children - 7 & 10.5 yrs of age	619	systematic	Mothers enrolled into Center for the Health Assessment of Mothers and Children of Salinas cohort study	n	USA - Salinas Vallye of California	mh	n	y	n	n	longitudinal mother-child cohort	blood sample - maternal prenatal (2nd trimester) or at delivery (if not able to collect prenatal) + maternal and or child at 9 yrs after delivery	DDT, DDE levels	neurdevelopment functioning test	Wechsler Intelligence Scale for Children (WISC) subtests: Block design, digit span, coding, letter-number sequencing, matrix reasoning, symbol search, similarities and vocabulary. Subtest results used to calculate: Full Sacle IQ score, scaled scores for Verbal Comprehension, Perceptual Reasoning, Processing Speed, Working Memory	Mother's: parity, education at delivery, time lived in US at time of child's birth, country of birth, age at delivery, cognitive functioning (intelligence), depression; language of neurodevelopmental assessment (English, Spanish), household poverty status at time of assessment, child's age, sex, home learning environment and quality of parent-child relationship)	Generalised Estimating Equation to test association between prenatal DDT / DDE & WISC scores for 7 & 10.5 year children combined	null		no significant association between prenatal DDT or DDE and IQ score or subscales for Verbal Comprehension, Perceptual Reasoning, Processing Speed, Working Memory for combined time points	not discussed	not discussed	not discussed		empirical	n		Include effect modification by gender for effect of DDE on cog dev at age 7 - i.e. prenatal DDE levesl inversely associated with Processing Speed and IQ at age 7 in girls but not boys.
gaspar2015	Quantiative	children - 7 yrs of age	316	systematic	subsample from Center for the Health Assessment of Mothers and Children of Salinas cohort study	n	USA - Salinas Vallye of California	mh	n	y	n	n	longitudinal mother-child cohort	blood sample - maternal prenatal (2nd trimester) or at delivery (if not able to collect prenatal) + maternal and or child at 9 yrs after delivery	DDT, DDE levels	neurdevelopment functioning test	Wechsler Intelligence Scale for Children (WISC) subtests: Block design, digit span, coding, letter-number sequencing, matrix reasoning, symbol search, similarities and vocabulary. Subtest results used to calculate: Full Sacle IQ score, scaled scores for Verbal Comprehension, Perceptual Reasoning, Processing Speed, Working Memory	Mother's: parity, education at delivery, time lived in US at time of child's birth, country of birth, age at delivery, cognitive functioning (intelligence), depression; language of neurodevelopmental assessment (English, Spanish), poverty status at time of assessment, child's age, sex, home learning environment and quality of parent-child relationship)	Linear regression to test association of DDT and age 7 Working memory	null		inverse (negative) association of pre-natal DDT levels and Working Memory in children age 7 but not significant	not discussed	not discussed	not discussed		empirical	n
gaspar2015	Quantiative	children - 7 yrs of age	316	systematic	subsample from Center for the Health Assessment of Mothers and Children of Salinas cohort study	n	USA - Salinas Vallye of California	mh	n	y	n	n	longitudinal mother-child cohort	blood sample - maternal prenatal (2nd trimester) or at delivery (if not able to collect prenatal) + maternal and or child at 9 yrs after delivery	DDT, DDE levels	neurdevelopment functioning test	Wechsler Intelligence Scale for Children (WISC) subtests: Block design, digit span, coding, letter-number sequencing, matrix reasoning, symbol search, similarities and vocabulary. Subtest results used to calculate: Full Sacle IQ score, scaled scores for Verbal Comprehension, Perceptual Reasoning, Processing Speed, Working Memory	Mother's: parity, education at delivery, time lived in US at time of child's birth, country of birth, age at delivery, cognitive functioning (intelligence), depression; language of neurodevelopmental assessment (English, Spanish), poverty status at time of assessment, child's age, sex, home learning environment and quality of parent-child relationship)	Linear regression to test association of DDT and age 7 Perceptual reasoning	null		inverse (negative) association of pre-natal DDT levels and Perceptual Reasoning in children age 7 but not significant	not discussed	not discussed	not discussed		empirical	n
gaspar2015	Quantiative	children - 7 yrs of age	316	systematic	subsample from Center for the Health Assessment of Mothers and Children of Salinas cohort study	n	USA - Salinas Vallye of California	mh	n	y	n	n	longitudinal mother-child cohort	blood sample - maternal prenatal (2nd trimester) or at delivery (if not able to collect prenatal) + maternal and or child at 9 yrs after delivery	DDT, DDE levels	neurdevelopment functioning test	Wechsler Intelligence Scale for Children (WISC) subtests: Block design, digit span, coding, letter-number sequencing, matrix reasoning, symbol search, similarities and vocabulary. Subtest results used to calculate: Full Sacle IQ score, scaled scores for Verbal Comprehension, Perceptual Reasoning, Processing Speed, Working Memory	Mother's: parity, education at delivery, time lived in US at time of child's birth, country of birth, age at delivery, cognitive functioning (intelligence), depression; language of neurodevelopmental assessment (English, Spanish), poverty status at time of assessment, child's age, sex, home learning environment and quality of parent-child relationship)	Linear regression to test association of DDT and age 7 Verbal comprehension	null		inverse (negative) association of pre-natal DDT on Verbal Comprehension in children age 7 approaching signficance (p=.08)	not discussed	not discussed	not discussed		empirical	n
gaspar2015	Quantiative	children - 7 yrs of age	316	systematic	subsample from Center for the Health Assessment of Mothers and Children of Salinas cohort study	n	USA - Salinas Vallye of California	mh	n	y	n	n	longitudinal mother-child cohort	blood sample - maternal prenatal (2nd trimester) or at delivery (if not able to collect prenatal) + maternal and or child at 9 yrs after delivery	DDT, DDE levels	neurdevelopment functioning test	Wechsler Intelligence Scale for Children (WISC) subtests: Block design, digit span, coding, letter-number sequencing, matrix reasoning, symbol search, similarities and vocabulary. Subtest results used to calculate: Full Sacle IQ score, scaled scores for Verbal Comprehension, Perceptual Reasoning, Processing Speed, Working Memory	Mother's: parity, education at delivery, time lived in US at time of child's birth, country of birth, age at delivery, cognitive functioning (intelligence), depression; language of neurodevelopmental assessment (English, Spanish), poverty status at time of assessment, child's age, sex, home learning environment and quality of parent-child relationship)	Linear regression to test association of DDT and age 7 Processing speed	negative		signficant inverse (negative) association of pre-natal DDT on Processing Speed in children age 7 (p=.03)	not discussed	not discussed	not discussed		empirical	n
gaspar2015	Quantiative	children - 7 yrs of age	316	systematic	subsample from Center for the Health Assessment of Mothers and Children of Salinas cohort study	n	USA - Salinas Vallye of California	mh	n	y	n	n	longitudinal mother-child cohort	blood sample - maternal prenatal (2nd trimester) or at delivery (if not able to collect prenatal) + maternal and or child at 9 yrs after delivery	DDT, DDE levels	neurdevelopment functioning test	Wechsler Intelligence Scale for Children (WISC) subtests: Block design, digit span, coding, letter-number sequencing, matrix reasoning, symbol search, similarities and vocabulary. Subtest results used to calculate: Full Sacle IQ score, scaled scores for Verbal Comprehension, Perceptual Reasoning, Processing Speed, Working Memory	Mother's: parity, education at delivery, time lived in US at time of child's birth, country of birth, age at delivery, cognitive functioning (intelligence), depression; language of neurodevelopmental assessment (English, Spanish), poverty status at time of assessment, child's age, sex, home learning environment and quality of parent-child relationship)	Linear regression to test association of DDT and age 7 IQ	null		inverse (negative) association of pre-natal DDT levels and IQ in children age 7 but not significant	not discussed	not discussed	not discussed		empirical	n
gaspar2015	Quantiative	children - 10.5 yrs of age	595	systematic	subsample from Center for the Health Assessment of Mothers and Children of Salinas cohort study	n	USA - Salinas Vallye of California	mh	n	y	n	n	longitudinal mother-child cohort	blood sample - maternal prenatal (2nd trimester) or at delivery (if not able to collect prenatal) + maternal and or child at 9 yrs after delivery	DDT, DDE levels	neurdevelopment functioning test	Wechsler Intelligence Scale for Children (WISC) subtests: Block design, digit span, coding, letter-number sequencing, matrix reasoning, symbol search, similarities and vocabulary. Subtest results used to calculate: Full Sacle IQ score, scaled scores for Verbal Comprehension, Perceptual Reasoning, Processing Speed, Working Memory	Mother's: parity, education at delivery, time lived in US at time of child's birth, country of birth, age at delivery, cognitive functioning (intelligence), depression; language of neurodevelopmental assessment (English, Spanish), poverty status at time of assessment, child's age, sex, home learning environment and quality of parent-child relationship)	Linear regression to test association of DDE and age 7 Working memory	null		no significant association between prenatal DDE Working Memory in 7 year olds	not discussed	not discussed	not discussed		empirical	n
gaspar2015	Quantiative	children - 10.5 yrs of age	595	systematic	subsample from Center for the Health Assessment of Mothers and Children of Salinas cohort study	n	USA - Salinas Vallye of California	mh	n	y	n	n	longitudinal mother-child cohort	blood sample - maternal prenatal (2nd trimester) or at delivery (if not able to collect prenatal) + maternal and or child at 9 yrs after delivery	DDT, DDE levels	neurdevelopment functioning test	Wechsler Intelligence Scale for Children (WISC) subtests: Block design, digit span, coding, letter-number sequencing, matrix reasoning, symbol search, similarities and vocabulary. Subtest results used to calculate: Full Sacle IQ score, scaled scores for Verbal Comprehension, Perceptual Reasoning, Processing Speed, Working Memory	Mother's: parity, education at delivery, time lived in US at time of child's birth, country of birth, age at delivery, cognitive functioning (intelligence), depression; language of neurodevelopmental assessment (English, Spanish), poverty status at time of assessment, child's age, sex, home learning environment and quality of parent-child relationship)	Linear regression to test association of DDE and age 7 Perceptual reasoning	null		no significant negative association between prenatal DDE and Perceptual Reasoning in 7 yr olds	not discussed	not discussed	not discussed		empirical	n
gaspar2015	Quantiative	children - 10.5 yrs of age	595	systematic	subsample from Center for the Health Assessment of Mothers and Children of Salinas cohort study	n	USA - Salinas Vallye of California	mh	n	y	n	n	longitudinal mother-child cohort	blood sample - maternal prenatal (2nd trimester) or at delivery (if not able to collect prenatal) + maternal and or child at 9 yrs after delivery	DDT, DDE levels	neurdevelopment functioning test	Wechsler Intelligence Scale for Children (WISC) subtests: Block design, digit span, coding, letter-number sequencing, matrix reasoning, symbol search, similarities and vocabulary. Subtest results used to calculate: Full Sacle IQ score, scaled scores for Verbal Comprehension, Perceptual Reasoning, Processing Speed, Working Memory	Mother's: parity, education at delivery, time lived in US at time of child's birth, country of birth, age at delivery, cognitive functioning (intelligence), depression; language of neurodevelopmental assessment (English, Spanish), poverty status at time of assessment, child's age, sex, home learning environment and quality of parent-child relationship)	Linear regression to test association of DDE and age 7 Verbal comprehension	null		no significant negative association between prenatal DDE and Verbal Comprehension in 7 yr olds	not discussed	not discussed	not discussed		empirical	n
gaspar2015	Quantiative	children - 10.5 yrs of age	595	systematic	subsample from Center for the Health Assessment of Mothers and Children of Salinas cohort study	n	USA - Salinas Vallye of California	mh	n	y	n	n	longitudinal mother-child cohort	blood sample - maternal prenatal (2nd trimester) or at delivery (if not able to collect prenatal) + maternal and or child at 9 yrs after delivery	DDT, DDE levels	neurdevelopment functioning test	Wechsler Intelligence Scale for Children (WISC) subtests: Block design, digit span, coding, letter-number sequencing, matrix reasoning, symbol search, similarities and vocabulary. Subtest results used to calculate: Full Sacle IQ score, scaled scores for Verbal Comprehension, Perceptual Reasoning, Processing Speed, Working Memory	Mother's: parity, education at delivery, time lived in US at time of child's birth, country of birth, age at delivery, cognitive functioning (intelligence), depression; language of neurodevelopmental assessment (English, Spanish), poverty status at time of assessment, child's age, sex, home learning environment and quality of parent-child relationship)	Linear regression to test association of DDE and age 7 Processing speed	null		no significant negative association between prenatal DDE and Processing Speed in 7 yr olds	not discussed	not discussed	not discussed	further investigate the effect modification by sex; adjust for puberty; assess whether effects are not long lasting	empirical	n
gaspar2015	Quantiative	children - 10.5 yrs of age	595	systematic	subsample from Center for the Health Assessment of Mothers and Children of Salinas cohort study	n	USA - Salinas Vallye of California	mh	n	y	n	n	longitudinal mother-child cohort	blood sample - maternal prenatal (2nd trimester) or at delivery (if not able to collect prenatal) + maternal and or child at 9 yrs after delivery	DDT, DDE levels	neurdevelopment functioning test	Wechsler Intelligence Scale for Children (WISC) subtests: Block design, digit span, coding, letter-number sequencing, matrix reasoning, symbol search, similarities and vocabulary. Subtest results used to calculate: Full Sacle IQ score, scaled scores for Verbal Comprehension, Perceptual Reasoning, Processing Speed, Working Memory	Mother's: parity, education at delivery, time lived in US at time of child's birth, country of birth, age at delivery, cognitive functioning (intelligence), depression; language of neurodevelopmental assessment (English, Spanish), poverty status at time of assessment, child's age, sex, home learning environment and quality of parent-child relationship)	Linear regression to test association of DDE and age 7 IQ	null		no significant negative association between prenatal DDE and IQ score in 7 yrs olds	not discussed	not discussed	not discussed	further investigate the effect modification by sex; adjust for puberty; assess whether effects are not long lasting	empirical	n
[truncated: 643 more rows]

## Sheet: Variable Descriptions
Variable	Description	Input data
paper_id	Unique ID comprising author+year+letter (if needed). This is consistent across all sheets, and the name of the PDF
study_type	Type of study from drop down list	Quantiative	Qualitative	Mixed
population	As described in the paper
sample_size	As decribed in paper
[truncated: 27 more rows]
