# Supplementary material for: The Contribution of Environmental Science to Mental Health Research: A Scoping Review
Source: Int J Environ Res Public Health. 2023 Mar 27;20(7):5278. doi: 10.3390/ijerph20075278 (PMC10094550; doi:10.3390/ijerph20075278)
Supplement: Supplementary file 1 [file ijerph-20-05278-s001.zip › Table S7 - Reviews - Supplementary Materials.xlsx]

## Sheet: Table S7
Classification of review papers for contribution of environmental science to mental health research. Carried out by MR.
Paper ID	Year	Search process?	Database searched?	Date range	Grey lit?	Geographical scope	climate change	flood	air pollution	temperature	greenspace	cyclone	drought	natural disaster	PM	pollution	weather	biodiversity	fire	noise	PM10	PM2.5	fracking	sealevel rise	bluespace	forest	landscape	tornado	landslide	water scarcity	wilderness therapy	NO2	Ozone	cognition	alzheimers	dementia	substance abuse	wellbeing	cognitive decline	mental health	psychiatric disorders	suicide	depression	anxiety	personality disorder	eating disorder	ADHD	OCD	bipolar
bangpan2019	2019	yes	yes	1980 - ?	yes	all								1																										1
barnes2019	2019	no
berry2010	2010	no
berry2011	2011	yes	yes	unknown	yes	all (maybe just Australia?)	1	1				1	1				1		1																								1	1
bhamani2012	2012	no
blashki2011	2011	no
boda2019	2019	no
bos2014	2014	yes	yes	2009-2013	no	all			1						1																			1
braithwaite2019	2019	yes	yes	1974 - 2017	no	all			1						1						1	1																			1		1	1					1
bratman2012	2012	yes	no
bratman2019	2019	no	no
buckley2017	2017	no
buoli2018	2018	yes	yes	1982-2017	no	all										1																										1	1	1	1	1	1	1	1
burke2018	2018	no
burton2016	2016	yes	yes	2005-2015	yes	Canada		1																																1
chan2019	2019	yes	yes	2000-2018	yes	China	1	1		1		1	1				1																							1
chen2018b	2018	no
cipiani2018	2018	yes	yes	-2017	yes	all			1																									1		1			1
clayton2018	2018	no
clayton2020	2020	no
cucurachi2012	2012	no
cunsolo2018	2018	no
cusack2011	2011	yes	yes	1995-2010	yes	all				1																											1			1
da2017	2017	no
dadvand2019(marselle2019)	2019	no
dangiulli2018	2018	no
dannenberg2019	2019	yes	yes		yes	all																		1																1
de2018	2018	yes	yes	-2017	yes	all			1						1						1	1										1	1
dean2011	2011	yes	yes	unknown	yes	all												1																						1
du2010	2010	yes	yes	1998 - ?	yes	all		1																																1
dunn2018	2018	no
dustun2010	2010	no
dyregrov2018	2018	no
eskanazi2020	2020	no
espinel2019	2019	no
every2016	2019	no
fitzgerald2019	2019	no
fleming2018a	2018	no
friel2011	2011	no
garcia2016	2016	yes	yes	-2015	yes	all		1		1		1	1						1									1	1											1
garza2019	2019	no
genc2012	2012	no
gifford2016	2016	no
gillis2016	2016	yes	yes	unknown	yes	all																									1									1
gladkikh2019	2019	yes	yes	-2018	yes	all					1														1	1	1													1
griffiths2013	2013	no
gruebner2017	2017	no
hanley2017	2017	yes	yes	unknown		all					1																													1
hayes2018	2018	no
hayes2018a	2018	yes	yes	2000-2017	yes	all	1																																	1
hayes2019	2019	yes	yes	2000-2017	yes	all	1																																	1
hirch2018	2018	yes	yes	1966-2016	yes	all																	1																	1
hoisington2019	2019	no
ingle2020	2020	no
jaakkola2018	2018	yes	yes	1990-2017	yes	Canada	1																															1
jevtic2017	2017	no
kabisch2019(marselle2019)	2019	yes	yes	2013 - ?	no	all					1																											1		1
kar2010	2010	yes	no
karjalainen2010	2010	no
kilian2018	2018	no
kinay2019	2019	yes	yes	2000 - ?	yes	China	1																																	1
kirch2018	2018	no
kjellstrom2013	2013	no
klatte2013	2013	no
klompmaker2019	2019	no
kousky2016	2016	no
krawisz2020	2020	no
kuo2015	2015	no
lanphear2015	2015	no
lapaige2010	2010	no
lederbogen2013	2013	no
leibold2018	2018	no
lerner2017	2017	no
lima2020a	2020	yes	yes		yes	all				1																														1
logan2012	2012	no
majeed2017	2017	no
mantler2015	2015	no
marselle2019	2019	no
marselle2019(marselle2019)	2019	no
marselle2019a(marselle2019)	2019	yes	yes	2013-2017	yes	all												1																						1
maughan2015	2015	no
mcmichael2011	2011	no
mcmichael2011a	2011	no
mcmichael2014	2014	no
moriyama2013	2013	no
mousavi2020	2020	yes	yes	-2017	yes	Iran	1																																	1
nahar2014	2014	no
negev2019	2019	no
nieuwenhuijsen2017	2017	no
nomikos2018	2018	no
nurse2010	2010	no
odeh2017	2017	no
olszewska2018	2018	no
padhy2015	2015	no
page2010	2010	no
palinkas2020	2020	no
parker2019a	2019	no
patz2014	2014	yes	yes	2009-2014	yes	all	1																																	1
paul2019a	2019	no
petkova2014	2014	no
pirrera2010	2010	no
powers2019	2019	no
prescott2016	2016	no
reichert2020	2020	no
sanson2019	2019	no
sarris2014	2014	no
sarris2019	2019	no
schikowski2020	2020	no
schneider2017	2017	no
schulte2016	2016	yes	yes	2008-2014	yes	all	1																																	1
seritan2020	2020	no
sharma2020	2020	no
shorthouse2018	2018	no
sinyor2017	2017	no
sjerp2019(marselle2019)	2019	no
stanke2012	2012	yes	yes	2004-2010	no	all		1																																1
stansfeld2015	2015	no
steinberg2016	2016	no
summers2018	2018	no
tischer2013	2013	no
tong2017	2017	no
torres2017	2017	no
trudel2016	2016	no
tzivian2015	2015	yes	yes		yes				1											1														1	1				1	1				1
van2017b	2017	no
van2019	2019	yes	yes				1		1		1			1		1				1																						1	1
veenema2017	2017	yes	yes		no	all	1	1				1		1																										1
verner2016	2016	yes	yes	1990-2014	no	all	1																																	1
vincent2018	2018	no
walton2018	2018	no
wiley2019	2019	no
yusa2015	2015	yes	yes	1993-2013	yes	Canada							1																	1										1
[truncated: 11 more columns]
