# Supplementary material for: The Contribution of Environmental Science to Mental Health Research: A Scoping Review
Source: Int J Environ Res Public Health. 2023 Mar 27;20(7):5278. doi: 10.3390/ijerph20075278 (PMC10094550; doi:10.3390/ijerph20075278)
Supplement: Supplementary file 1 [file ijerph-20-05278-s001.zip › Table S8 - Inaccessible Papers - Supplementary Materials.xlsx]

## Sheet: Sheet1
Inaccessible papers to the review team.
Paper ID code	Title	Publication	DOI	Reason
connerton2019	Building Community Resilience to Mitigate Mental Health Effects of Climate Change	Creat Nurs	10.1891/1078-4535.25.3.e9	Not found
kang2019	Comments on Early Life Exposure to Air Pollution,Cognitive Development, and Labor Market Outcome	ASIAN ECONOMIC PAPERS	10.1162/ASEP_a_00697	Not found
peng2015	Research on the Psychological Effect of Low-frequency Noise on People and its Evaluation Methods	2015 4TH INTERNATIONAL CONFERENCE ON ENERGY AND ENVIRONMENTAL PROTECTION (ICEEP 2015)		Conferecne abstract only
yoda2013	Mental health research for the 2011 flood affected people in Thailand	TROPICAL MEDICINE & INTERNATIONAL HEALTH		Not found
jernigan2018	Introduction			Not enough info for ILL
sebastian2012	Don't leave me out!	PSYCHOLOGIST		Not enough info for ILL
cole2015	Researching wellbeing in a woodland: participant and researcher occupational engagement	BRITISH JOURNAL OF OCCUPATIONAL THERAPY		Not found
demeniex2014	Losing our minds: How environmental pollution impairs human intellengence and mental health			Not able to borrow due to covid
yang2010	Correlation Study between Indoor Air Pollution and Mental Health Status of Inhabitant	CONFERENCE ON ENVIRONMENTAL POLLUTION AND PUBLIC HEALTH, VOL 1-2		Not enough info for ILL
hayashi2010	Citizen Education Programs at Awaji Landscape Planning & Horticulture Academy for the Improvement of the Landscape and the Environment	47TH INTERNATIONAL FEDERATION OF LANDSCAPE ARCHITECTS (IFLA) WORLD CONGRESS		Not enough info for ILL
